# Supplementary material for: Comprehensive analysis of MHC class II genes in teleost fish genomes reveals dispensability of the peptide-loading DM system in a large part of vertebrates
Source: PubMed Central journal article supplement (PMC4219347; doi:10.1186/1471-2148-13-260), 2013-11-26
Supplement: 1471-2148-13-260-S4.pdf [file 1471-2148-13-260-S4.pdf]

**Supplementary Table 1 (Table S1).** MHC class II loci and their syntenic regions in selected teleosts  
*( in most cases, the corresponding genomic regions in other teleosts do not harbor MHC class II genes)*

| <b>Table of Contents</b>                                                                    | <b>Page</b> |
|---------------------------------------------------------------------------------------------|-------------|
| Zebrafish MHC class II regions vs. Stickleback, Medaka, Fugu, Tetraodon and Tilapia         | 2           |
| Stickleback MHC class II regions vs. Zebrafish, Medaka, Fugu, Tetraodon and Tilapia         | 3           |
| Medaka MHC class II regions vs. Zebrafish, Stickleback, Fugu, Tetraodon and Tilapia         | 5           |
| Fugu MHC class II region vs. Zebrafish, Stickleback, Medaka, Tetraodon and Tilapia          | 6           |
| Tetraodon MHC class II regions vs. Zebrafish, Stickleback, Medaka, Fugu and Tilapia         | 6           |
| Tilapia MHC class II regions vs. Zebrafish, Stickleback, Medaka, Fugu and Tetraodon         | 8           |
| Atlantic salmon MHC class II regions vs. Zebrafish, Stickleback, Medaka, Fugu and Tetraodon | 10          |

| Zebrafish |                      | Stickleback      | Medaka           | Fugu              | Tetraodon        | Tilapia             |
|-----------|----------------------|------------------|------------------|-------------------|------------------|---------------------|
| D4        | NLRC3L               | n.d.             | Chr.18:2.629.600 | Scf.2447:4.113    | n.d.             | n.d.                |
|           | Unknown              | n.d.             | n.d.             | n.d.              | n.d.             | GL831209            |
|           | <b>D4A/B</b>         |                  |                  |                   |                  |                     |
|           | ZNFx4                | n.d.             | n.d.             | n.d.              | n.d.             | n.d.                |
| D8.35     | RBBP6_L              | n.d.             | n.d.             | Scf.53:898.327    | Chr.17:1.653.446 | GL831326            |
|           | HPDB                 | GXIII:13.290.215 | Chr.9:18.622.367 | n.d.              | n.d.             | GL831172: 1.294.114 |
|           | SETD1BB              | GXIII:13.282.445 | Chr.9:18.612.614 | Scf. 18: 453.778  | n.d.             | GL831172: 1.285.788 |
|           | <b>D8.35B1/B2</b>    |                  |                  |                   |                  |                     |
|           | TMEM132B             | GXIII:13.944.818 | Chr.9:19.618.387 | Scf.18:1.174.946  | UnR:31.307.781   | GL831172: 2.128.374 |
|           | <b>D8.35A1/A2/B3</b> |                  |                  |                   |                  |                     |
| D8.37     | SLC15A4              | GXIII:14.029.539 | Chr.9:19.755.023 | Scf.18:1.291.525  | UnR:31.279.716   | GL831172: 2.255.367 |
|           | GLT1D1               | GXIII:14.049.028 | Chr.9:19.792.739 | Scf.18: 1.311.022 | n.d.             | GL831172: 2.282.512 |
|           | <b>D8.37A1-A4</b>    |                  |                  |                   |                  |                     |
|           | SLC7A4               | GXIII:13.350.890 | Chr.9:18.704.026 | Scf.18:520.320    | UnR:32.008.291   | GL831172: 1.372.903 |
|           | CCDC157              | GXIII:13.346.373 | n.d.             | Scf.18:513.776    | n.d.             | GL831172:1.363.660  |
|           | SF3A1                | GXIII:13.339.590 | Chr.9:18.692.948 | Scf.18:508.693    | UnR:32.021.413   | GL831172:1.359.416  |
|           | POLD2                | GXIII:13.220.417 | Chr.9:18.518.461 | Scf.264:190.621   | UnR:31.222.302   | GL831172:1.189.044  |
|           | PQBP1                | GrXII:15.904.368 | Chr.7:21.756.808 | Scf.226:128.037   | Chr.9:9.051.292  | GL831137            |
| D8.45     | NCOR2                | GXIII:14.315.394 | Chr.9:20.215.207 | Scf.18:1.601.763  | UnR:38.312.941   | GL831172: 2.634.367 |
|           | <b>D8.45B1-A2</b>    |                  |                  |                   |                  |                     |
|           | PIWIL1               | GXIII:14.130.304 | Chr.9:19.921.196 | Scf.18:1.419.252  | UnR:31.156.268   | GL831172: 2.394.350 |
|           | FZD10                | GXIII:14.111.971 | Chr.9:19.890.541 | n.d.              | UnR:31.090.716   | GL831172: 2.371.011 |
|           | STX2                 | GXIII:14.211.776 | Chr.9:20.078.621 | Scf.18:1.500.768  | UnR:65.389.529   | GL831172: 2.507.123 |
|           | RIMBP2               | GXIII:14.143.110 | Chr.9:19.943.132 | Scf.18:1.436.544  | UnR:70.299.887   | GL831172: 2.408.450 |
|           | GPR133               | n.d.             | n.d.             | n.d.              | UnR:65.378.282   | GL831172: 2.513.990 |
| D8.46     | GPCR                 | GXIII:13.189.929 | Chr.9:18.468.058 | Scf.442:56.039    | n.d.             | GL831172: 1.120.343 |
|           | LSM1                 | GXIII:13.170.146 | Chr.9:18.440.734 | Scf.442:41.505    | UnR:65.942.413   | GL831172: 1.115.727 |
|           | BAG4                 | GXIII:13.167.467 | Chr.9:18.438.330 | Scf.442:38.830    | UnR:65.944.659   | GL831172: 1.112.594 |
|           | RTDR1                | Scf.150:112.809  | n.d.             | Scf.114: 604.297  | n.d.             | GL831312:66.763     |
|           | AFAP1_L              | n.d.             | n.d.             | n.d.              | n.d.             | GL831312:112,497    |
|           | <b>D8.46A</b>        |                  |                  |                   |                  |                     |
|           | PABPC1               | GXII:650.653     | Chr.7            | Scf. 75:1.035.824 | Chr.9: 6.330.537 | GL831137            |
|           | UBAP2                | GXIII:8.149.971  | Chr.9:11.395.215 | Scf. 50:58.566    | Chr.12:7.056.141 | GL831152            |
|           | ADAMTS13             | GXIII:13.880.401 | Chr.9:19.453.416 | n.d.              | UnR:31.470.879   | GL831172: 2.044.605 |
|           | ZMYM1_L              | Scf.167:64.533   | n.d.             | n.d.              | n.d.             | GL832525            |
|           |                      |                  |                  |                   |                  |                     |

Table S1 Syntenic MHC class II regions

| Zebrafish continued |                  | Stickleback       | Medaka            | Fugu              | Tetraodon        | Tilapia             |
|---------------------|------------------|-------------------|-------------------|-------------------|------------------|---------------------|
| D18                 | CMC2             | GI: 12.292.363    | n.d.              | Scf.14: 2.096.814 | Chr.5: 4.711.852 | GL831150: 1.596.536 |
|                     | CENPN            | GI: 12.288.560    | Chr.3: 21.254.929 | Scf.14: 2.095.145 | Chr.5: 4.713.882 | GL831150: 1.599.648 |
|                     | RBBP6_L          | n.d.              | n.d.              | Scf.53:898.327    | Chr.17:1.653.446 | GL831326            |
|                     | <b>D18A/B</b>    |                   |                   |                   |                  |                     |
|                     | ATMIN            | GI: 12.283.042    | Chr.3: 21.247.448 | Scf.14: 2.089.379 | Chr.5: 4.717.287 | GL831150: 1.604.447 |
|                     | PPP1R3E          | n.d.              | Chr.3: 21.241.354 | n.d.              | Chr.5: 4.724.982 | GL831150: 1.620.406 |
|                     | GOLGA4_L         | GrVI:6.358.824    | n.d.              | n.d.              | n.d.             | GL831252            |
|                     |                  |                   |                   |                   |                  |                     |
| Stickleback         |                  | Zebrafish         | Medaka            | Fugu              | Tetraodon        | Tilapia             |
| G129                | PSMB6            | Chr.23:44.652.957 | Chr.8:4.823.628   | Scf. 424:143.401  | UnR:40.621.744   | GL831342:278.199    |
|                     | EPHB4            | Zv9_NA779         | n.d.              | Scf. 402:5.474    | UnR:70.874.307   | GL831342:309.748    |
|                     | MEPCE            | Chr.23:44.402.392 | n.d.              | Scf. 424:147.998  | UnR:106.275.040  | GL831379:643.206    |
|                     | DLG4             | Chr.23:44.268.701 | Scf.1442:25.444   | Scf. 402:32.715   | UnR:70.843.659   | GL831774            |
|                     | TFR2             | Zv9_NA897         | n.d.              | Scf. 402:37.797   | UnR:70.838.346   | GL831845            |
| <b>S3</b>           | <b>G129B/A</b>   |                   |                   | <b>F402A</b>      | <b>T70B</b>      |                     |
|                     | CTC1             | Chr.23:45.325.889 | n.d.              | Scf. 402:64.273   | n.d.             | GL832020            |
|                     | HMGB2            | Chr.23:45.378.522 | Scf.1967:1.837    | Scf. 402:76.862   | UnR:71.999.816   | GL831518            |
|                     | ATP1B            | n.d.              | n.d.              | Scf. 402:82.016   | UnR:72.002.429   | GL831351            |
|                     |                  |                   |                   |                   |                  |                     |
| G131                | CNGA1            | Chr.23:44.017.505 | UC203:176.762     | Scf. 740:169      | UnR:56.732.984   | GL831493            |
|                     | WBP1             | Chr.23:45.997.451 | n.d.              | Scf.621:51.885    | n.d.             | GL831291:714.765    |
|                     | CYP17A2          | Chr.23:45.948.521 | Chr.18:279.057    | Scf.621:51.885    | UnR:98.346.022   | GL831291:701.015    |
|                     | <b>G131A1-B3</b> |                   |                   |                   |                  |                     |
|                     | SGMS2            | Chr.23:44.875.565 | Chr.18:555.231    | Scf. 6036:2.897   | UnR:54.726.952   | GL831291:570.396    |
|                     | AIMP1            | Chr.23:44.855.060 | Chr.18:564.126    | Scf. 2313:179     | UnR:48.006.042   | GL831291:536.611    |
|                     | DKK4             | n.d.              | n.d.              | n.d.              | n.d.             | GL831291:526.045    |
|                     |                  |                   |                   |                   |                  |                     |
| GIII                | AGAP3 x 2        | Chr.24:35.366.423 | Chr.17:28.440.606 | Scf.107:119.468   | 15_R:823.730     | GL831134:3.466.401  |
|                     | GBX1             | Chr.24:35.435.371 | Chr.17:28.522.709 | Scf.107:111.117   | 15_R:907.856     | GL831134:3.411.562  |
|                     | ASB10            | Chr.24:35.444.281 | Chr.17:28.526.083 | Scf. 107:105.296  | 15_R:911.579     | GL831134:3.404.685  |
|                     | H2B_L            | Chr.24:35.333.778 | n.d.              | Scf. 107:100.745  | 15_R:919.098     | GL831134:3.399.190  |
|                     | <b>GIIB</b>      |                   |                   |                   |                  |                     |
|                     | ACCN3            | Chr.24:35.130.485 | Chr.17:28.644.339 | Scf. 107:39.746   | 15_R:955.175     | GL831134:3.284.342  |
|                     | CD5K             | Chr.24:34.834.786 | Chr.17:28.671.879 | Scf.107:33.167    | 15_R:978.390     | GL831134:3.271.875  |
|                     | ABCB8            | Chr.24:35.043.861 | Chr.17:28.677.484 | Scf. 107:28.882   | 15_R:981.254     | GL831134:3.262.257  |
|                     | ATG9A-L          | Chr.24:35.064.904 | Chr.17:28.686.442 | Scf.107:22.479    | 15_R:986.079     | GL831134:3.254.863  |
|                     | STARD3NL         | Chr.2:31.556.322  | Chr.17:8.746.037  | Scf.468:74.384    | 15:695.986       | GL831411:585.257    |

Table S1 Syntenic MHC class II regions

| Stickleback continued |                 | Zebrafish         | Medaka            | Fugu             | Tetraodon          | Tilapia             |
|-----------------------|-----------------|-------------------|-------------------|------------------|--------------------|---------------------|
| GVII                  | SIX3-L          | Chr.7:8.229.740   | Chr.18:19.163.388 | Scf.330:59.482   | UnR:1.377.273      | GL831189:3.365.738  |
|                       | PFDN2           | Chr.7:8.305.446   | Chr.18:19.133.450 | Scf.330:47.191   | UnR:1.365.975      | GL831189:3.337.092  |
|                       | NIT1            | Chr.7:8.323.082   | Chr.18:19.074.805 | Scf. 330:45.113  | UnR:1.361.293      | GL831189:3.041.473  |
|                       | CLCN3           | Chr.7:8.339.962   | Chr.18:19.074.805 | Scf. 330:28.432  | UnR:1.349.314      | GL831189:3.001.419  |
|                       | <b>GVII B/A</b> |                   |                   |                  |                    |                     |
|                       | LITR-L          | n.d.              | n.d.              | n.d.             | n.d.               | n.d.                |
|                       | MFAP3L          | Chr.7:8.490.244   | Chr.18:19.068.970 | Scf. 330:22.705  | UnR:1.337.061      | GL831189:2.989.262  |
|                       | AADAT           | Chr.7:8.511.219   | Chr.18:19.044.703 | Scf.330:17.047   | UnR:1.331.803      | GL831189:2.973.033  |
|                       | INO80B          | Chr.7:8.529.938   | Chr.18:19.039.986 | Scf. 330:14.388  | UnR:1.329.331      | GL831189:2.967.875  |
|                       | INTU            | Chr.7:8.542.822   | Chr.18:19.019.460 | Scf.330:4.400    | UnR:1.321.556      | GL831189:2.942.331  |
| RG9MTD3               | Chr.7:8.604.057 | Chr.18:19.011.614 | Scf.421:112.617   | UnR:1.314.590    | GL831189:2.830.600 |                     |
|                       |                 |                   |                   |                  |                    |                     |
| GXVII                 | CYC1            | Chr.6:50.332.650  | Scf.1000:10.331   | Scf.617:6.363    | UnR:16.886.105     | GL831197:3.136.390  |
|                       | RALY            | Chr.6:49.973.818  | n.d.              | n.d.             | n.d.               | GL831197:3.359.158  |
|                       | AHCY            | Chr.6:49.877.781  | Chr.5:25.394.140  | Scf. 446:52.707  | UnR:16.949.188     | GL831197: 3.490.487 |
|                       | CHMP4B          | Chr.8:47.446.286  | Chr.5:25.384.960  | Scf. 446:47.360  | UnR:16.959.941     | GL831197: 3.515.710 |
| <b>S2</b>             | <b>GXVII B</b>  |                   | <b>M5A/B</b>      |                  | <b>O97A/B</b>      |                     |
|                       | PCK1            | Chr.6:59.719.127  | Chr.5:25.350.583  | Scf. 161:355.098 | UnR:14.099.792     | GL831197: 3.552.052 |
|                       | PMEP1A1         | Chr.6:59.740.415  | Chr.5:25.267.810  | n.d.             | n.d.               | GL831197:3.577.543  |
|                       | <b>GXVII A</b>  |                   |                   |                  |                    |                     |
|                       | CCNDBP1         | Chr.6:59.708.235  | n.d.              | n.d.             | Chr.11:11.854.054  | GL831197:3.657.642  |
|                       | EPB42           | n.d.              | n.d.              | n.d.             | Chr.11:11.848.823  | GL831197:3.671.186  |
|                       | TOMM34          | Chr.6:52.177.501  | Chr.5:27.351.471  | Scf. 6922:1.587  | Chr.11:11.844.548  | n.d.                |
|                       |                 |                   |                   |                  |                    |                     |
| GXX                   | EPB41L4B        | Chr.16:28.852.157 | Chr.16:14.708.369 | Scf.48:199.792   | Chr.8:7.617.425    | GL831229:808.045    |
|                       | PTPH1           | Chr.16:28.797.936 | Chr.16:14.720.036 | Scf.48:189.554   | Chr.8:7.638.302    | GL831229:824.818    |
|                       | L3MBTL3         | Chr.16:28.761.051 | Chr.16:14.750.967 | Scf. 48:172.685  | Chr.8:7.655.586    | GL831229: 863.071   |
|                       | MSH5            | Chr.15:38.575.684 | Chr.16:14.772.665 | Scf. 48:159.703  | Chr.8:7.668.232    | GL831229: 885.277   |
| <b>S1</b>             | <b>GXX B</b>    |                   | <b>M16A/B</b>     |                  | <b>O29A/B</b>      |                     |
|                       | Fam171A1        | Chr.16:30.750.192 | Chr.16:14.794.577 | Scf.48:143.031   | Chr.8:7.679.120    | GL831229: 943.374   |
|                       | NMT2            | Chr.16:30.806.591 | Chr.16:14.816.398 | Scf.48:136.977   | Chr.8:7.692.718    | GL831229: 970.929   |
|                       | RPP38           | Chr.16:30.820.734 | Chr.16:14.825.191 | Scf.48:133.649   | Chr.8:7.698.737    | GL831229: 980.495   |
|                       | CROT x 2        | Chr.16:30.830.213 | Chr.16:14.828.029 | Scf.48:124.127   | Chr.8:7.700.349    | GL831229:983.823    |
|                       | ABCB4           | Chr.16:30.856.980 | Chr.16:14.850.646 | Scf.48:103.925   | Chr.8:7.716.939    | GL831229:1.060.640  |
|                       |                 |                   |                   |                  |                    |                     |

Table S1 Syntenic MHC class II regions

| Medaka  |                   | Zebrafish         | Stickleback       | Fugu              | Tetraodon          | Tilapia             |
|---------|-------------------|-------------------|-------------------|-------------------|--------------------|---------------------|
| M3      | PTPLAD1           | Chr.18:18.762.788 | GII: 19.620.980   | Scf.1: 1.145.009  | Chr.5: 12.249.251  | GL831285:331.108    |
|         | SLC22A18          | Chr.7:40.930.516  | GII: 19.628.202   | Scf. 1: 1.150.247 | n.d.               | GL831285:346.180    |
|         | NR2E3             | n.d.              | GII: 19.644.637   | Scf.1: 1.163.408  | Chr.5: 12.235.809  | GL831285:385.728    |
|         | CUZD1             | Chr.18:4.356.366  | GII: 21.510.201   | n.d.              | Chr.5: 12.893.148  | GL831133            |
|         | <b>M3A/B</b>      |                   |                   |                   |                    |                     |
|         | PPF1A1            | n.d.              | GII: 22.859.068   | Scf.1: 288.852    | Chr.5: 12.899.435  | GL831252:2.078.984  |
|         | CTTN              | Chr.18:49.869.166 | n.d.              | Scf. 1: 279.900   | Chr.5: 12.916.554  | GL831252: 2.028.419 |
|         | SHANK2            | Chr.24:39.973.233 | GII: 22.895.911   | Scf. 1: 212.019   | Chr.5: 12.924.700  | GL831252: 1.976.473 |
|         | GOLGB1            | n.d.              | GII: 22.996.403   | Scf.1: 161.425    | Chr.5: 12.966.563  | GL831252:1.616.213  |
|         | GUCA1A            | n.d.              | GII: 23.020.314   | Scf.1: 158.175    | Chr.5: 12.986.897  | GL831252:1.580.982  |
| M5      | HDAC11            | Chr.11:28.072.424 | GXVII: 11.863.800 | n.d.              | n.d.               | GL831180:2.847.726  |
|         | IQSEC1            | Chr.11:27.637.741 | GXVII: 11.717.942 | Scf.445:97.361    | Chr.11:11.619.175  | GL831180:3.236.385  |
|         | AHCY              | Chr.6:49.877.781  | GXVII:1.107.153   | Scf.446:52.707    | UnR:16.949.188     | GL831197:3.490.487  |
|         | CHMP4B            | Chr.8:47.459.659  | GXVII:1.114.739   | Scf.446: 47.360   | UnR:16.959.941     | GL831197:3.515.710  |
|         | <b>S2</b>         | <b>M5B1/2</b>     | <b>GXVIIA/B</b>   |                   |                    | <b>O97A/B</b>       |
|         | PCK1              | Chr.6:59.719.127  | GXVII:1.121.929   | Scf. 161:355.098  | UnR:14.099.792     | GL831197: 3.552.052 |
|         | PMEPA1            | Chr.6:59.740.415  | GXVII:1.135.673   | n.d.              | n.d.               | GL831197:3.577.543  |
|         | <b>M5A</b>        |                   |                   |                   |                    |                     |
|         | ARL8B             | Chr.11:36.586.179 | GXVII:14.246.498  | Scf.79: 957.723   | Chr.11:10.309.119  | GL831152:2.681.750  |
|         | NAAA              | n.d.              | GXVII:14.241.699  | Scf.79: 961.076   | Chr.11:10.311.937  | GL831152:2.674.234  |
| BHLH_L  | Chr.11:36.600.441 | GXVII:14.235.937  | Scf.79: 966.481   | Chr.11:10.317.107 | GL831152:2.653.753 |                     |
| C1orf50 | Chr.11:40.340.778 | GXVII:11.660.012  | Scf.467: 45.344   | Chr.11:11.582.596 | GL831180:4.339.411 |                     |
| M16     | SGK1_L            | Chr.16:28.781.210 | n.d.              | Scf.48:182.956    | Chr.8:7.648.850    | GL831229:853.361    |
|         | .....             | Chr.16:28.761.051 | GXX: 10.781.656   | Scf.48:172.685    | Chr.8:7.655.586    | GL831229:863.080    |
|         | MSH5              | Chr.15:38.580.110 | GXX:10.800.083    | Scf. 48:159.703   | Chr.8:7.668.232    | GL831229: 885.277   |
|         | SPSB2             | Chr.23:44.581.024 | n.d.              | Scf. 48:157.643   | n.d.               | GL831229: 899.420   |
|         | <b>S1</b>         | <b>M16A/B</b>     | <b>GXXB</b>       |                   |                    | <b>O29A/B</b>       |
|         | FAM171A1          | Chr.16:30.750.192 | GXX:10.816.365    | Scf. 48:143.031   | Chr.8: 7.679.120   | GL831229: 943.374   |
|         | NMT2              | Chr.16:30.806.591 | GXX:10.834.107    | Scf. 48:136.977   | Chr.8: 7.692.718   | GL831229: 970.929   |
|         | RPP38             | Chr.16:30.820.734 | GXX:10.842.692    | Scf.48:133.649    | Chr.8:7.698.737    | GL831229:980.498    |
|         | CROT              | Chr.16:30.830.213 | GXX:10.855.978    | Scf.48:124.127    | Chr.8:7.700.349    | GL831229:983.823    |
|         | ABCB4             | Chr.16:30.856.980 | GXX:10.864.560    | Scf.48:103.925    | Chr.8:7.716.939    | GL831229:1.060.640  |

Table S1 Syntenic MHC class II regions

| Fugu      |               | Zebrafish         | Stickleback      | Medaka            | Tetraodon         | Tilapia             |
|-----------|---------------|-------------------|------------------|-------------------|-------------------|---------------------|
| F402      | EPHB4         | Zv9_NA779         | Scf.129:90.158   | n.d.              | UnR:70.880.142    | GL831342/ GL831183  |
|           | DLG4          | Chr.23:44.268.701 | Scf.129:118.581  | Scf.1442:26.444   | UnR:70.843.659    | GL831774            |
|           | TFR2          | Zv9_NA897         | Scf.129:135.238  | n.d.              | UnR:70.838.346    | GL831845            |
| <b>S3</b> | <b>F402A</b>  |                   | <b>G129A/B</b>   |                   | <b>T70B</b>       |                     |
|           | CTC1          | Chr.23:45.325.889 | Scf.129:147.088  | n.d.              | n.d.              | GL832020            |
|           | HMGB2         | Chr.23:45.378.522 | Scf.129:158.380  | Scf.1967:1.837    | UnR:71.999.816    | GL831518            |
|           | ATP1B2        | n.d.              | Scf.129:164.036  | n.d.              | UnR:72.002.429    | GL831351:515.715    |
|           | MOGAT1        | Chr23:45.618.635  | Scf.129:186.554  | n.d.              | UnR:35.821.686    | GL831520:131.917    |
|           | PIK3CA        | Chr23:44.356.963  | Scf.129:231.307  | n.d.              | UnR:35.807.769    | GL831520:153.849    |
|           | EIF4E2        | Chr23:44.555.187  | Scf.129:225.241  | n.d.              | UnR:35.802.864    | GL831520:166.250    |
|           | GUCY2D        | n.d.              | Scf.129:206.279  | Chr.22:22.666.268 | UnR:35.796.245    | GL831520:179.334    |
|           |               |                   |                  |                   |                   |                     |
| Tetraodon |               | Zebrafish         | Stickleback      | Medaka            | Fugu              | Tilapia             |
| T19       | NCCRP1        | Chr.5: 38.450.813 | GVII:12.647.467  | Chr.14:831.206    | Scf.188: 260.384  | GL831214:2.185.976  |
|           | INTS4         | Chr.18:47.303.990 | GI: 17.421.594   | n.d.              | Scf.188: 264.634  | GL831203:2.473.914  |
|           | C11orf67      | Chr.18:47.297.135 | n.d.             | Chr.13:1.586.522  | Scf.188: 273.726  | GL831203:2.484.650  |
|           | PANX1         | Chr.15 :2.466.960 | GI: 17.134.277   | Chr.13: 4.107.311 | Scf. 188:277.686  | GL831340: 1.018.422 |
|           | RSF1          | Chr.18:47.273.922 | n.d.             | Chr.13: 4.094.390 | Scf. 188:285.419  | GL831340: 1.041.560 |
|           | <b>T19A/B</b> |                   |                  |                   |                   |                     |
|           | RCE1          | Chr.7:19.450.362  | Scf.47:540.375   | n.d.              | Scf. 164:71.882   | GL831627            |
|           | FAT3          | Chr.15:39.318.576 | Scf.119: 101.294 | Chr.13:19.729.310 | Scf. 188: 375.455 | GL831537            |
|           | BLMH          | Chr.15:27.983.464 | GI: 2.798.666    | Chr.13:27.211.283 | Scf.188: 412.050  | GL831505:143.439    |
|           | SLC6A4        | Chr.15:27.957.909 | GI: 2.782.049    | Chr.13:27.183.908 | Scf.188: 430.670  | GL831505:116.870    |
|           | ANKRD13B      | Chr.15:27.832.122 | GI: 2.735.505    | Chr.13:26.072.772 | Scf.188: 450.147  | GL831505:35.528     |
|           |               |                   |                  |                   |                   |                     |
| T48       | HDAC6         | Chr.8:7.930.067   | Scf.237:44.323   | n.d.              | Scf.215:32.643    | GL831387            |
|           | TMEM161B      | Chr.5:49.810.772  | GXIII:10.349.815 | Chr.9:14.558.622  | Scf. 4:210.065    | GL831329            |
|           | DNMT3B        | Chr.23:17.131.889 | GXII:12.806.093  | n.d.              | Scf.215:437.938   | GL831175            |
|           | MYO1F         | n.d.              | n.d.             | n.d.              | n.d.              | GL831168            |
|           | WDR62         | Chr.15:5.473.526  | G I:217.115      | UC149:95.098      | Scf. 564:34.643   | GL831718            |
|           | <b>T48B</b>   |                   |                  |                   |                   |                     |
|           | Chr3orf32     | Chr.22:33.629.681 | n.d.             | n.d.              | n.d.              | GL831335            |
|           | CCDC106       | Chr.16:19.704.473 | G XX:12.120.567  | Chr.16:16.748.136 | Scf. 202:226.875  | GL831225            |
|           | C6            | Chr.21:19.623.347 | G XIV:10.371.247 | Chr.12:27.464.701 | Scf. 128:628.595  | GL831141            |
|           | PKC           | n.d.              | n.d.             | n.d.              | Scf.2649:11.948   | GL831260            |
|           | INTS4         | Chr.18:47.303.990 | GI:17.421.594    | Chr.13:1.577.031  | Scf.188:264.634   | GL831203            |

Table S1 Syntenic MHC class II regions

| Tetraodon continued |               | Zebrafish         | Stickleback       | Medaka            | Fugu              | Tilapia            |
|---------------------|---------------|-------------------|-------------------|-------------------|-------------------|--------------------|
| T55                 | RPS18         | Chr.19:18.309.668 | GX:15.061.664     | Chr.11:2.209.205  | Scf.69: 1.073.156 | GL831741:86.058    |
|                     | VPS52         | Chr.19:18.319.012 | GX:15.053.871     | Chr.11:2.196.487  | Scf.69: 1.076.609 | GL831741:71.383    |
|                     | ATF6B         | Chr.19:49.751.546 | GX:15.025.766     | n.d.              | Scf.69: 1.084.874 | GL831484:165.401   |
|                     | GOLGA1        | Chr.8:43.506.717  | GXIII:887.062     | Chr.9:28.086.400  | Scf.264:345.428   | GL831302:572.628   |
|                     | OLFML2A       | Chr.8:43.320.596  | GXIII:834.795     | Chr.9: 27.996.857 | Scf. 264:314.148  | GL831302:655.412   |
|                     | PPP1R8        | Chr.16:5.457.755  | GXX:17.783.601    | n.d.              | Scf. 196:28.838   | GL831224           |
|                     | <b>T55A</b>   |                   |                   |                   |                   |                    |
|                     | TTN           | Chr.9: 43.806.035 | n.d.              | n.d.              | Scf. 348:15.779   | GL831334           |
|                     | IRGC_L        | Chr.19:11.737.390 | n.d.              | n.d.              | Scf. 517:93.715   | GL831704           |
|                     | AKR1B10_L     | Chr.18:12.660.381 | Scf. 163 :112.139 | Chr.6:23.143.763  | Scf.241:247.650   | GL831139:1.860.773 |
|                     | EI24          | Chr.10:40.609.588 | n.d.              | Scf.817:62.204    | Scf.536:36.913    | GL831477:162.054   |
|                     | STT3A         | Chr.10:40.563.412 | GVII: 13.275.786  | Scf. 817:41.023   | Scf.536:42.568    | GL831477:175.674   |
|                     |               |                   |                   |                   |                   |                    |
| T61                 | CALHM3        | Chr.13:25.634.484 | GVI:4.004.487     | Chr.15:3.041.522  | Scf.52: 47.902    | GL831300:17.778    |
|                     | HELLS         | Chr.13:7.618.563  | GVI:3.992.608     | Chr.15:3.015.081  | Scf.52: 51.213    | GL831350:663.615   |
|                     | PITPNC1       | Chr.16:15.175.955 | GXX:12.254.945    | Chr.16:16.541.556 | Scf.202:98.250    | GL831225:326.753   |
|                     | LAMA5         | Chr.23:9.674.223  | GXII:13.049.591   | UC90:1.377.780    | Scf. 278:117.509  | GL831175           |
|                     | LRFN1_L       | Chr.18:48.265.500 | GI:17.961.864     | Chr.13:823.408    | Scf. 795:29.840   | GL831203           |
|                     | <b>T61A/B</b> |                   |                   |                   |                   |                    |
|                     | PLXNA1        | Zv9_NA907         | GXII:4.743.053    | Chr.7:1.999.714   | Scf. 118:774.981  | GL831205           |
|                     | DNER          | Chr.18:45.108.870 | GI:5.694.625      | Chr.13:22.196.384 | Scf. 144:225.973  | GL831147           |
|                     | GRID2_L       | n.d.              | n.d.              | n.d.              | n.d.              | GL831176:2.076.408 |
|                     | TPX2          | Chr.23:32.267.153 | GXII: 18.203.851  | UC90:938.627      | Scf.220:353.137   | GL831283:1.622.658 |
|                     | PLOD1_L       | Chr.8:50.009.104  | GXII: 18.206.113  | UC90:942.034      | Scf.220:339.048   | GL831283:1.627.683 |
|                     |               |                   |                   |                   |                   |                    |
| T70                 | EPHB_L x 3    | Zv9_NA779         | Scf.129: 90.158   | Scf.3830:2.187    | Scf.402: 5.474    | GL831342:309748    |
|                     | DLG4          | Chr.23:44.268.701 | Scf.129:118.581   | Scf. 1442:26.444  | Scf. 402:32.715   | GL831774           |
|                     | TFR2          | ZV9_NA897         | Scf.129:135.238   | n.d.              | Scf. 402:37.797   | GL831845           |
| <b>S3</b>           | <b>T70B</b>   |                   | <b>G129A/B</b>    |                   | <b>F402A</b>      |                    |
|                     | CUBN x 2      | Chr.24:33.276.866 | Scf.95: 388.665   | UC236:1.438.620   | Scf.547:85.662    | GL831320:423.828   |
|                     | ALG14         | Chr.24:31.321.583 | n.d.              | Chr.20:3.080.376  | Scf.547:47.819    | GL831383:725.870   |
|                     | PKC_L         | Chr.15:16.117.502 | Scf.95: 249.204   | n.d.              | Scf.5214/ 4004    | GL831383:704.291   |
|                     | HMGB2         | Chr.23:45.378.522 | Scf.129:158.380   | Scf.1967:1.837    | Scf.402:76.862    | GL831518           |
|                     |               |                   |                   |                   |                   |                    |

Table S1 Syntenic MHC class II regions

| Tilapia    |                 | Zebrafish                | Stickleback           | Medaka                   | Fugu                   | Tetraodon              |
|------------|-----------------|--------------------------|-----------------------|--------------------------|------------------------|------------------------|
| O1         | <b>O1A/B</b>    |                          |                       |                          |                        |                        |
|            | GAB1            | Chr.1:35.202.952         | GVII:966.526          | Chr.18:3.063.666         | Scf.376:60.687         | UnR:17.929.806         |
|            | TRPC5           | Chr.1:9.662.985          | GVII:20.270.942       | Chr.18:3.552.469         | n.d.                   | UnR:17.849.569         |
| O9         | PRKG1           | Chr.12: 6.897.537        | <b>GV:12.160.086</b>  | n.d.                     | scf.581                | <b>Chr.2:2.611.712</b> |
|            | ASAH2B          | Chr.12: 6.801.178        | n.d.                  | <b>UC.222:506.418</b>    | <b>Scf.59: 102.191</b> | Chr.18:4.051.504       |
|            | <b>O09A/B</b>   |                          |                       |                          |                        |                        |
|            | MFAP4x2         | Chr.1: 59.845.805        | n.d.                  | <b>UC.222:537.097</b>    | <b>Scf.59: 93.065</b>  | <b>Chr.2:2.740.410</b> |
|            | SLC16A12        | Chr.12: 18.034.721       | <b>GV:12: 216.057</b> | <b>UC.222:495.147</b>    | <b>Scf.59: 124.588</b> | <b>Chr.2:2.056.409</b> |
| O18        | <b>O18B1-A1</b> |                          |                       |                          |                        |                        |
| <b>S3?</b> | HMGB2           | Chr.23:45.378.522        | Scf.129:158.380       | Scf.1967:1.837           | Scf.402:76.862         | UnR:71.999.816         |
|            | <b>O18B2-B3</b> |                          |                       |                          |                        |                        |
| O22        | BTN1A1_L        | Chr.3: 10.134.571        | GVII:439.559          | n.d.                     | n.d.                   | n.d.                   |
|            | MRC2            | Chr.3: 19.619.398        | GXI:6.248.585         | Chr.8:5.646.506          | Scf.15: 1.761.632      | Chr.3:13.433.969       |
|            | <b>O22A1_A5</b> |                          |                       |                          |                        |                        |
|            | HSPA5           | Chr.5:2.513.293          | GXIV:5.312.943        | Chr.12:11.605.128        | Scf.44: 42.301         | Chr.4:8.303.158        |
| O29        | L3MBTL3         | <b>Chr.16:28.761.051</b> | <b>GXX:10.781.656</b> | <b>Chr.16:14.750.967</b> | <b>Scf.48:172.685</b>  | <b>Chr.8:7.655.586</b> |
|            | MSH5            | Chr.15: 38.575.684       | <b>GXX:10.800.083</b> | <b>Chr.16:14.772.665</b> | <b>Scf.48:159.703</b>  | <b>Chr.8:7.668.232</b> |
|            | SPSB2           | Chr.23: 44.581.024       | n.d.                  | <b>Chr.16:14.782.474</b> | <b>Scf.48:157.643</b>  | n.d.                   |
| <b>S1</b>  | <b>O29B1-A3</b> |                          | <b>GXXB</b>           | <b>M16A/B</b>            |                        |                        |
|            | FAM171A1        | <b>Chr.16:30.750.192</b> | <b>GXX:10.816.365</b> | <b>Chr.16:14.794.577</b> | <b>Scf.48:143.031</b>  | <b>Chr.8:7.679.120</b> |
|            | NMT2            | <b>Chr.16:30.806.591</b> | <b>GXX:10.834.107</b> | <b>Chr.16:14.816.398</b> | <b>Scf.48:136.977</b>  | <b>Chr.8:7.692.718</b> |
|            | RPP38           | <b>Chr.16:30.820.734</b> | <b>GXX:10.842.692</b> | <b>Chr.16:14.825.191</b> | <b>Scf.48:133.649</b>  | <b>Chr.8:7.698.737</b> |
|            | CROT            | <b>Chr.16:30.830.213</b> | <b>GXX:10.845.416</b> | <b>Chr.16:14.828.029</b> | <b>Scf.48:124.127</b>  | <b>Chr.8:7.700.349</b> |
|            | ABCB4           | <b>Chr.16:30.856.980</b> | <b>GXX:10.864.560</b> | <b>Chr.16:14.850.646</b> | <b>Scf.48:103.925</b>  | <b>Chr.8:7.707.197</b> |
| O33        | <b>O33A-B2</b>  |                          |                       |                          |                        |                        |
|            | TBK1            | Chr.19:46.929.677        | Scf.90:143.888        | Chr.5:28.682.754         | Scf.79:279.045         | UnR:58.576.752         |
|            | CNOT2           | Chr.25:29.545.555        | GXIX/ scf.231         | Chr.6:26.455.950         | Scf.119/ Scf.708       | Chr.13:6.807.528       |

Table S1 Syntenic MHC class II regions



| Tilapia continued |                 | Zebrafish                | Stickleback            | Medaka                  | Fugu                   | Tetraodon              |
|-------------------|-----------------|--------------------------|------------------------|-------------------------|------------------------|------------------------|
| O39               | OVGP1           | Chr.11/ Chr.23           | GXVII:12.535.457       | Chr.5:19.295.343        | Scf.463,Scf.634        | UnR:85.205.727         |
|                   | ST3GAL1         | Chr.19: 5.397.769        | GX/ Scf.299            | n.d.                    | n.d.                   | n.d.                   |
|                   | <b>O39A</b>     |                          |                        |                         |                        |                        |
|                   | STEAP4          | Chr.16: 29.963.111       | GXX:10.242.469         | Chr.16:14.020.716       | Scf.48:600.592         | Chr.8.:7.228.457       |
|                   |                 |                          |                        |                         |                        |                        |
| O57               | SLC25A19        | Chr.3: 13.530            | <b>GXI:11.348.540</b>  | <b>Chr.8:13.361.222</b> | <b>Scf.141:501.882</b> | <b>Chr.3:9.152.643</b> |
|                   | PITPNC1         | <b>Chr.3: 61457.723</b>  | <b>GXI:11.317.078</b>  | Chr.1:34.110.814        | Scf.345:13.813         | <b>Chr.3:9.155.523</b> |
|                   | <b>O57B/A</b>   |                          |                        |                         |                        |                        |
|                   | AIMP2           | <b>Chr.3: 61.536.570</b> | <b>GXI:11.276.414</b>  | <b>Chr.8:13.234.021</b> | <b>Scf.141:439.708</b> | <b>Chr.3:9.206.460</b> |
|                   | OCM2            | Chr.12:18.772.767        | n.d.                   | Chr.19:2.117.402        | Scf.3:2.170.256        | Chr.2:6.257.483        |
|                   |                 |                          |                        |                         |                        |                        |
| O79               | MRC2            | Chr.3: 19.619.398        | GXI:6.248.585          | Chr.8:5.646.506         | Scf.15:1.761.632       | Chr.3:13.433.969       |
|                   | <b>O79B1-A3</b> |                          |                        |                         |                        |                        |
|                   | MEPCE           | Chr.5:71.671.171         | GVII/ Scf.129          | Chr.14:14.838.942       | Scf.6:2.463.912        | Chr.7:5.229.705        |
|                   | <b>O79A4</b>    |                          |                        |                         |                        |                        |
|                   | SULT3           | Chr.8:48.713.195         | GXII:1.048.504         | Chr.7:17.232.422        | n.d.                   | Chr.9:6.550.211        |
|                   |                 |                          |                        |                         |                        |                        |
| O97               | CYC1            | Chr.6:50.332.650         | <b>GXVII:986.235</b>   | Scf.1000:10.331         | Scf.617:6,363          | UnR:16.886.105         |
|                   | AHCY            | Chr.6:49.877.781         | <b>GXVII:1.100.095</b> | <b>Chr.5:25.394.140</b> | Scf.446:52.707         | UnR:16.949.188         |
|                   | CHMP4B          | Chr.8 :47.446.286        | <b>GXVII:1.110.308</b> | <b>Chr.5:25.384.960</b> | Scf.446:47.360         | UnR:16.959.941         |
| <b>S2</b>         | <b>O97B1-B2</b> |                          | <b>GXVIIA/B</b>        | <b>M5A/B</b>            |                        |                        |
|                   | PCK1            | <b>Chr.6:59.719.127</b>  | <b>GXVII:1.121.929</b> | <b>Chr.5:25.350.583</b> | Scf. 161:355.098       | UnR:14.099.792         |
|                   | PMEPA1_L        | <b>Chr.6:59.740.415</b>  | <b>GXVII:1135673</b>   | <b>Chr.5:25.267.810</b> | n.d.                   | n.d.                   |
|                   | <b>O97A</b>     |                          |                        |                         |                        |                        |
|                   | CCNDP1          | <b>Chr.6:59.708.235</b>  | <b>GXVII:1.165.796</b> | n.d.                    | n.d.                   | Chr.11:11.854.054      |
|                   |                 |                          |                        |                         |                        |                        |
| O845              | <b>O845A-B</b>  |                          |                        |                         |                        |                        |
| <b>S3?</b>        | TFR2            | NA897:1.069              | Scf.129:135.238        | n.d.                    | Scf.402:37.797         | UnR:70.838.346         |
|                   |                 |                          |                        |                         |                        |                        |

Table S1 Syntenic MHC class II regions

| Salmon  |                 | Zebrafish         | Stickleback     | Medaka                               | Fugu             | Tetraodon                         |
|---------|-----------------|-------------------|-----------------|--------------------------------------|------------------|-----------------------------------|
| Chr.2/5 | <b>DEB/DFB</b>  |                   |                 |                                      |                  |                                   |
|         | <b>DEA/ DFA</b> |                   |                 |                                      |                  |                                   |
|         | BRD2            | Chr.16:52.047.628 | GXX:15.423.966  | Chr.16:26.286.443                    | Scf.523:14.385   | UnR:16.332.513                    |
|         | TAP1            | Chr.16:52.016.406 | GXX:15.435.937  | Chr.16:26.297.009                    | Scf.170:283.968  | UnR:51.424.050                    |
|         | Notch_L         | Chr.16:51.985.714 | GXX:15.444.113  | n.d.                                 | n.d.             | UnR:51.421.235                    |
|         | PBX2            | Chr.16:51.950.122 | GXX:15.465.731  | Chr.16:26.332.781                    | Scf.35:1.468.422 | Chr.8:1.647.368                   |
|         | GPSM2_L         | Chr.16:51.935.066 | GXX:15.471.440  | n.d.                                 | n.d.             | Chr.8:1.652.742                   |
|         | DNASE2_L        | Chr.16:48.401.686 | GXX:15.475.753  | Chr.16:26.344.217                    | Scf.35:1.474.634 | Chr.8:1.655.888                   |
|         | RGL2            | Chr.16:48.428.502 | GXX:15.483.091  | Chr.16:26.358.136                    | Scf.35:1.478.555 | Chr.8:1.659.325                   |
|         |                 |                   |                 |                                      |                  |                                   |
| Chr.13  | NRGN            | Chr.5:59.838.779  | n.d.            | Chr.13:15.288.355                    | Scf.9:1.826.292  | Chr.16:811.072                    |
|         | TIPRL           | Chr.10:95.633     | GVII:12.553.815 | Chr.14:13.130.762                    | Scf.99:625.880   | UnR:94.342.257                    |
|         | <b>DBB/DBA</b>  |                   |                 |                                      |                  |                                   |
|         | TBCEL           | Chr.5:66.448.092  | GVII:24.894.073 | Chr.14:30.375.487                    | Scf.82:990.257   | UnR:57.638.616                    |
|         | TECTA           | Chr.5:66.384.027  | GVII:24.910.348 | Chr.14:30.399.001                    | Scf.82:973.246   | UnR:52.884.328                    |
|         |                 |                   |                 |                                      |                  |                                   |
| S532    | <b>DCA/ DCB</b> |                   |                 |                                      |                  |                                   |
|         | DYNC1LI2        | Chr.19:18.591.795 | GX:8.704.088    | Chr.3:15.839.156<br>Chr.11:8.463.826 | Scf.45:483.586   | Chr.21:827.386<br>Chr.5:7.862.069 |

Pink and gray boxes indicate syntenic regions with matching genes on both ( red font) or only one side of the MHC class II genes, respectively. MHC class II genes are depicted in green font and S1-S3 syteny groups in blue. n.d.= no data, Scf.=scaffold, Chr.=chromosome, UnR= Unrandom, UC= ultracontig, R= random. Regions with MHC genes only or highly abundant genes were omitted from the analysis.

Table S1 Syntenic MHC class II regions
