# Supplementary material for: Comprehensive analysis of MHC class II genes in teleost fish genomes reveals dispensability of the peptide-loading DM system in a large part of vertebrates
Source: PubMed Central journal article supplement (PMC4219347; doi:10.1186/1471-2148-13-260), 2013-11-26
Supplement: 1471-2148-13-260-S5.pdf [file 1471-2148-13-260-S5.pdf]

**Supplementary Table 2 (Table S2).** MHC class II gene Ensembl IDs, Ensembl genomic locations, and number of matching cDNA reports in GenBank non-specific datasets, for zebrafish, stickleback, medaka, Fugu, Tetraodon, tilapia, and spotted gar

| Species/ Name                                      | MHC gene Ensembl ID    | Genomic location Ensembl          | EST match alpha 2 and beta 2 domain (Genbank) |
|----------------------------------------------------|------------------------|-----------------------------------|-----------------------------------------------|
| <b>Zebrafish (<i>Danio rerio</i>)</b>              |                        |                                   | <b>ESTs (#1.488.275)</b>                      |
| D4B                                                | ENSDARG00000054921     | Chr. 4: 61.874.514-61.880.599     | 1 EST 100% id 100% cov. (EB769231)            |
| D4A                                                | ENSDARG00000020286     | Chr. 4: 61.887.203-61.893.205     | 14 ESTs 100% id 100% cov. (e.g. CF996478)     |
| D8.35B1 $\psi$                                     | ENSDARG00000093706     | Chr. 8: 35.956.336-36.146.143     | 5' end missing Pseudogene                     |
| D8.35B2                                            | ENSDARG00000053738     | Chr. 8: 35.956.359-35.959.768     | 1 EST > 97% id 100% cov. (CK030151)           |
| D8.35A1                                            | ENSDARG00000053739     | Chr. 8: 36.131.728-36.140.054     | 1 EST > 97% id 100% cov. (DT880928)           |
| D8.35A2                                            | ENSDARG00000055441     | Chr. 8: 36.283.500-36.286.998     | 31 ESTs 100% id 100% cov. (e.g. EH498789)     |
| D8.35B3                                            | ENSDARG00000055447     | Chr. 8: 36.288.188-36.289.984     | 32 ESTs 100% id 100% cov. (e.g. DN896667)     |
| D8.37A1                                            | ENSDARG00000074816     | Chr. 8: 37.465.644-37.474.349     | <86% id 100% cov.                             |
| D8.37B1                                            | ENSDARG00000074510     | Chr. 8: 37.476.789-37.482.114     | 2 ESTs 100% id 100% cov. (e.g. CN023898)      |
| D8.37A2                                            | ENSDARG00000070206     | Chr. 8: 37.488.525-37.498.906     | 2 ESTs 100% id 100% cov. (e.g. EG576857)      |
| D8.37B2 $\psi$                                     | ENSDARG00000076307     | Chr. 8: 37.510.422-37.511.403     | 5' end missing Pseudogene                     |
| D8.37A3                                            | ENSDARG00000031745     | Chr. 8: 37.539.907-37.543.263     | 50 ESTs 100% id 100% cov. (e.g. EB979084)     |
| D8.37B3                                            | ENSDARG00000079105     | Chr. 8: 37.546.100-37.548.453     | 50 ESTs 100% id 100% cov. (e.g. DT061156)     |
| D8.37A4                                            | ENSDARG00000001832     | Chr. 8: 37.574.076-37.576.393     | 39 ESTs 100% id 100% cov. (e.g. CO353326)     |
| D8.45B1                                            | ENSDARG00000041705     | Chr. 8: 45.758,566-45.761.489     | 1 EST 100% id 100% cov. (CO798204)            |
| D8.45A1                                            | ENSDARG00000079593     | Chr. 8: 45.768.098-45.769.605     | <88% id 100% cov.                             |
| D8.45B2                                            | ENSDARG00000088872     | Chr. 8: 45.773.380-45.774.524     | <85% id 100% cov.                             |
| D8.45A2                                            | ENSDARG00000086294     | Chr. 8: 45.778.095-45.779.781     | <85% id 100% cov.                             |
| D8.46A                                             | ENSDARG00000075932     | Chr. 8: 47.078.720-47.080.882     | 2 ESTs 100% id 100% cov. (e.g. EH450259)      |
| D18B                                               | ENSDARG00000056330     | Chr. 18: 29.872.428-29.875.206    | 6 ESTs > 98% id 100% cov. (e.g. EH441901)     |
| D18A $\psi$                                        | ENSDARG00000093885     | Chr. 18: 29.867.551-29.868.594    | 5'+ 3' missing Pseudogene                     |
| <b>Stickleback (<i>Gasterosteus aculeatus</i>)</b> |                        |                                   | <b>ESTs (# 276.992)</b>                       |
| G129B $\psi$                                       | No Ensembl gene report | Scf.129 contig12675:25.778-25.611 | 5'+3' missing; Pseudogene                     |
| G129A $\psi$                                       | No Ensembl gene report | Scf.129 contig12675:26.484-26.221 | 5'+TM CYT missing Pseudogene                  |
| G131A1                                             | ENSGACG00000000330     | Scf. 131: 52.153-54.217           | 22 ESTs > 97% id 100% cov. (e.g. DW672198)    |
| G131B1                                             | ENSGACG00000000336     | Scf. 131: 56.853-59.742           | 3 ESTs 100% id 100% cov. (e.g. DV011001)      |

Table S2 MHC class II gene Ensembl IDs, Ensembl genomic locations, and number of matching cDNAs in GenBank

|                                        |                        |                                |                                            |
|----------------------------------------|------------------------|--------------------------------|--------------------------------------------|
| <b>G131A2</b>                          | ENSGACG00000000344     | Scf. 131: 78.913-81.169        | 5 ESTs > 97% id_ 100% cov. (e.g. DW672198) |
| G131B2 $\psi$                          | ENSGACG00000000346     | Scf. 131: 96.885-99.355        | ORF error Pseudogene                       |
| G131A3                                 | ENSGACG00000000348     | Scf.131: 118.613-120.538       | <99% id_ 97% cov.                          |
| <b>G131B3</b>                          | ENSGACG00000000350     | Scf. 131: 121.399-126.270      | 3 ESTs 100% id_ 100% cov. (e.g. DV011001)  |
| <b>GIIB</b>                            | ENSGACG00000017967     | Gr.III: 16.679.542-16.682.223  | 3 ESTs 100% id_ 100% cov. (e.g.DV011001)   |
| GVIIB                                  | ENSGACG00000019051     | Gr.VII: 2.444.693-2,447,881    | <88% id_ 100% cov.                         |
| GVIIA                                  | ENSGACG00000019052     | Gr.VII: 2.449.972-2,451,242    | <92% id_ 100% cov.                         |
| <b>GXVIIB</b>                          | ENSGACG00000003680     | Gr.XVII: 1.117.113-1.119.770   | 7 ESTs > 97% id_ 100% cov. (e.g. DW594610) |
| GXVIIA                                 | ENSGACG00000003731     | Gr.XVII: 1.163.942-1.165.035   | <46% id_ 93% cov.                          |
| GXXB $\psi$                            | No Ensembl gene report | Gr.XX: 10.813.73-10.814.066    | 5'+TM CYT missing Pseudogene               |
| <b>Medaka (<i>Oryzias latipes</i>)</b> |                        |                                | <b>ESTs (# 666.891)</b>                    |
| M3A                                    | ENSORLG00000000021     | Chr. 3: 554.841-556.227        | <90% id_ 100% cov.                         |
| M3B                                    | ENSORLG00000000025     | Chr. 3: 558.225-564.744        | <85% id_ 100% cov.                         |
| <b>M5A</b>                             | ENSORLG00000012794     | Chr. 5: 25.231.039-25.236.341  | 2 ESTS 100% id_ 100% cov. (e.g. BJ877464)  |
| M5B1                                   | ENSORLG00000012822     | Chr. 5: 25.371.618-25.375.673  | <38% id_ 100% cov.                         |
| M5B2                                   | ENSORLG00000012826     | Chr. 5: 25.378.549-25.379.616  | <38% id_ 100% cov.                         |
| M16B                                   | ENSORLG00000009164+    | Chr. 16: 14.786.594-14.790.902 | <57% id_ 100% cov.                         |
| M16A                                   | ENSORLP00000011499+    | Chr. 16: 14.790.903-14.792.142 | <50% id_ 100% cov.                         |
| M615B                                  | ENSORLG00000019376     | Scf.615: 38.464-43.568         | <88% id_ 100% cov.                         |
| M615A                                  | ENSORLG00000019409     | Scf.615: 87.448-89.094         | <90% id_ 100% cov.                         |
| <b>M873B</b>                           | ENSORLG00000018856     | Scf.873: 60.767-63.324         | 34 ESTs 100% id_ 100% cov. (e.g. FS518487) |
| <b>M873A</b>                           | ENSORLG00000018887     | Scf.873: 65.205-67.367         | 34 ESTs 100% id_ 100% cov. (e.g. BJ883759) |
| <b>Fugu (<i>Takifugu rubripes</i>)</b> |                        |                                | <b>ESTS (# 26.069)</b>                     |
| <b>F402A</b>                           | ENSTRUG00000004342     | Scf. 402: 55.188-57.563        | 1 ESTs >97% id 100% cov. (CA846902)        |
| F713A $\psi$                           | No Ensembl gene report | Scf. 713: 89-334               | L+3' end missing Pseudogene                |
| <b>F7533A</b>                          | ENSTRUG00000017444     | Scf. 7533: 430-1.814           | 1 EST > 97% id_ 100% cov. (CA846902)       |
| <b>F7533B</b>                          | ENSTRUG00000017449     | Scf. 7533: 2.656-4.187         | 2 ESTs > 97% id_ 100% cov. (e.g. CA846190) |
| F7721A                                 | ENSTRUG00000000833     | Scf. 7721: 158-1.461           | TM CYT missing <97% id_ 100% cov.          |
| F7721B $\psi$                          | No Ensembl gene report | Scf. 7721: 2.626-3.027         | 3' end missing Pseudogene                  |
| F8524B $\psi$                          | ENSTRUG00000002062     | Scf. 8524: 1.050-3.165         | ORF error_Pseudogene                       |
|                                        |                        |                                |                                            |

Table S2 MHC class II gene Ensembl IDs, Ensembl genomic locations, and number of matching cDNAs in GenBank

| <b>Tetraodon (<i>Tetraodon nigroviridis</i>)</b> |                           |                                 | <b>Nucleotide collection (nr/nt) (# 108.463)</b>          |
|--------------------------------------------------|---------------------------|---------------------------------|-----------------------------------------------------------|
| <b>T19A</b>                                      | ENSTNIG00000005593        | Chr UnR: 19.583.822-19.591.157  | TM CYT missing_3 cDNAs 100% id_100% cov. (e.g. CR731060)  |
| <b>T19B</b>                                      | ENSTNIG00000005592        | Chr UnR: 19.597.929-19.598.797  | 4 cDNAs > 97% id_100% cov. (e.g. CR727057)                |
| T48B $\psi$                                      | ENSTNIG00000002162        | Chr UnR: 48.695.828-48.696.540  | 5' end missing_Pseudogene                                 |
| <b>T55A</b>                                      | ENSTNIG00000000926        | Chr UnR: 55.779.303-55.780.575  | 3 cDNAs > 97% id_100% cov. (e.g. CR731060)                |
| <b>T61A</b>                                      | ENSTNIG00000000531        | Chr UnR: 61.617.277-61.620.814  | 12 cDNAs > 97% id_100% cov. (e.g. CR682088)               |
| T61B $\psi$                                      | ENSTNIG00000003745        | Chr UnR: 61.621.456-61.622.716  | ORF error_pseudogene                                      |
| T70B $\psi$                                      | ENSTNIG00000004611        | Chr UnR: 70.836.268-70.837.419  | 5'end missing_Pseudogene                                  |
| <b>Tilapia (<i>Oreochromis niloticus</i>)</b>    |                           |                                 | <b>ESTs (#120.991) or Nucleotide collection (#82.618)</b> |
| O1A                                              | ENSONIG00000006325        | GL831301.1: 1.431.629-1.433.771 | <77% id_100% cov.                                         |
| O1B                                              | ENSONIG00000006327        | GL831301.1: 1.435.653-1.439.547 | <88% id_100% cov.                                         |
| O9A                                              | ENSONIG00000019112        | GL831209.1: 2.227.167-2.229.515 | <45% id_97% cov.                                          |
| O9B                                              | ENSONIG00000019113        | GL831209.1: 2.230.917-2.233.060 | <46% id_94% cov.                                          |
| O18B1                                            | ENSONIG00000019932        | GL831518.1: 4.104-13.309        | <90%id_100% cov.                                          |
| O18B2                                            | ENSONIG00000019937        | GL831518.1: 312.391-316.936     | <95% id_100% cov.                                         |
| O18B3 $\psi$                                     | ENSONIG00000019944        | GL831518.1: 404.131-408.913     | ORF error_Pseudogene                                      |
| O18A1                                            | ENSONIG00000019933        | GL831518.1: 18.305-20.484       | <94% id_100% cov.                                         |
| O18A2                                            | ENSONIG00000019940        | GL831518.1: 317.998-320.025     | <92% id_100% cov.                                         |
| O18A3                                            | ENSONIG00000019943        | GL831518.1: 399.821-401.995     | <96% id_100% cov.                                         |
| O22A1                                            | ENSONIG00000012437        | GL831322.1: 920.733-935.169     | <91% id_100% cov.                                         |
| O22B1                                            | ENSONIG00000012441        | GL831322.1: 945.399-948.614     | <69% id_100% cov.                                         |
| O22A2 $\psi$                                     | No Ensembl gene report ID | GL831322.1: 1.002.299-1.002.538 | L+3' missing_Pseudogene                                   |
| O22A3 $\psi$                                     | No Ensembl gene report ID | GL831322.1: 1.234.580-1.234.813 | L+3' missing_Pseudogene                                   |
| O22A4 $\psi$                                     | No Ensembl gene report ID | GL831322.1: 1.279.567-1.279.812 | L+3' missing_Pseudogene                                   |
| O22A5 $\psi$                                     | No Ensembl gene report ID | GL831322.1: 1.359,006-1.361.338 | L+3' missing_Pseudogene                                   |
| O22A6 $\psi$                                     | No Ensembl gene report ID | GL831322.1: 1.368.491-1.368.730 | L+3' missing_Pseudogene                                   |
| O22B2 $\psi$                                     | No Ensembl gene report ID | GL831322.1: 1.369.583-1.369.858 | L+3' missing_Pseudogene                                   |
| O29B1                                            | ENSONIG00000006116        | GL831229.1: 905.654-908.009     | <54% id_100% cov.                                         |
| O29B2 $\psi$                                     | No Ensembl gene report ID | GL831229.1: 925.993-926.199     | L+3' missing_Pseudogene                                   |
| O29B3 $\psi$                                     | No Ensembl gene report ID | GL831229.1: 933.642-933.887     | L+3' missing_Pseudogene                                   |
| O29A1 $\psi$                                     | No Ensembl gene report ID | GL831229.1: 909.268-909.463     | 5'+TM CYT missing_Pseudogene                              |

Table S2 MHC class II gene Ensembl IDs, Ensembl genomic locations, and number of matching cDNAs in GenBank

|              |                           |                                 |                                           |
|--------------|---------------------------|---------------------------------|-------------------------------------------|
| O29A2 $\psi$ | No Ensembl gene report ID | GL831229.1: 920.028-920.170     | 5' +TM CYT missing Pseudogene             |
| <b>O29A3</b> | ENSONIG00000006121        | GL831229.1: 938.918-940.053     | 2 ESTs > 98% id 100% cov. (e.g. GR667686) |
| O31B1        | ENSONIG00000007425        | GL831231.1: 498.924-502.495     | <84% id 100% cov.                         |
| O31B2        | ENSONIG00000007445        | GL831231.1: 1.171.738-1.174.377 | L missing <84% id 100% cov.               |
| O31B3        | ENSONIG00000007449        | GL831231.1: 1.232.619-1.236.792 | <96% id 100% cov.                         |
| O31A1 $\psi$ | No Ensembl gene report ID | GL831231.1: 463.509-463.778     | 5' missing Pseudogene                     |
| O31A2 $\psi$ | No Ensembl gene report ID | GL831231.1: 505.586-505.849     | 5'+TM CYT missing Pseudogene              |
| O31A3        | ENSONIG00000007446        | GL831231.1: 1.175.562-1.178.887 | <80% id 100% cov.                         |
| O31A4        | ENSONIG00000007453        | GL831231.1: 1.242.793-1.244.465 | <78% id 100% cov.                         |
| O33A         | ENSONIG00000009902        | GL831433.1: 1.722-3.127         | <95% id 100% cov.                         |
| O33B1 $\psi$ | No Ensembl gene report ID | GL831433.1: 5.113-5.340         | 5' missing Pseudogene                     |
| O33B2 $\psi$ | No Ensembl gene report ID | GL831433.1: 16.120-16.443       | 5' missing Pseudogene                     |
| O39A $\psi$  | ENSONIG00000010744        | GL831439.1: 301.122-309.267     | 3' missing Pseudogene                     |
| O42A         | ENSONIG00000018452        | GL831842.1: 89.157-98.104       | <99% id 97% cov.                          |
| O49B $\psi$  | No Ensembl gene report ID | GL832249.1: 577-1.128           | 5' missing Pseudogene                     |
| O50B $\psi$  | No Ensembl gene report ID | GL831650.1: 197.860-198.901     | 5'+ 3' missing Pseudogene                 |
| <b>O57B</b>  | ENSONIG00000002259        | GL831257.1: 1.608.728-1.609.986 | 1 EST 100% id 100% cov. (GR627548)        |
| O57A         | ENSONIG00000002263        | GL831257.1: 1.611.410-1.612.511 | <73% id 100% cov.                         |
| O77B $\psi$  | No Ensembl gene report ID | GL831677: 200.297-200.562       | 5'+ 3' missing Pseudogene                 |
| O79B1 $\psi$ | No Ensembl gene report ID | GL831379.1: 603.325-604.139     | L+3' missing Pseudogene                   |
| <b>O79B2</b> | ENSONIG00000009129        | GL831379.1: 618.993-627.882     | 1 EST > 97% id 100% cov. (FF281534)       |
| O79A1        | ENSONIG00000009128        | GL831379.1: 610.569-612.303     | <95 % id 97% cov.                         |
| O79A2 $\psi$ | No Ensembl gene report ID | GL831379.1: 614.307-615.228     | 5' missing Pseudogene                     |
| <b>O79A3</b> | ENSONIG00000009132        | GL831379.1: 630.011-633.534     | 2 ESTs > 97% id 100% cov. (e.g. GR671091) |
| O79A4 $\psi$ | No Ensembl gene report ID | GL831379.1: 677.707:677.997     | 5' + TM CYT missing Pseudogene            |
| <b>O80B</b>  | ENSONIG00000005905        | GL832180.1: 12.190-16.972       | 1 EST > 97% id 100% cov. (GR702301)       |
| O97B1 $\psi$ | ENSONIG00000004432        | GL831197.1: 3.529.581-3.531.898 | L+3' missing Pseudogene                   |
| O97B2 $\psi$ | ENSONIG00000004434        | GL831197.1: 3.534.451-3.536.032 | Missing 24 aa b2 domain Pseudogene        |
| O97A         | ENSONIG00000004441        | GL831197.1: 3.645.982-3.653.566 | 1 EST without ORF (GR679428)              |
| O745B        | ENSONIG00000003902        | GL831745.1: 25.751-37.458       | <95% id 100% cov.                         |
| O745A        | ENSONIG00000003904        | GL831745.1: 44.977-46.516       | <95% id 100% cov.                         |
| O779B $\psi$ | No Ensembl gene report ID | GL831779: 69.741-70.530         | 5'+ 3' missing Pseudogene                 |

Table S2 MHC class II gene Ensembl IDs, Ensembl genomic locations, and number of matching cDNAs in GenBank

|                                                  |                           |                             |                                    |
|--------------------------------------------------|---------------------------|-----------------------------|------------------------------------|
| <b>O845A</b>                                     | ENSONIG00000019001        | GL831845.1: 36.104-40.196   | 1 EST 100% id 100% cov. (GR696948) |
| O845B                                            | ENSONIG00000019004        | GL831845.1: 41.863-44.745   | <69% id 100% cov.                  |
| OA35A $\psi$                                     | No Ensembl gene report ID | AERX01073735.2: 6-251       | L+ 3' missing Pseudogene           |
| OA35B $\psi$                                     | No Ensembl gene report ID | AERX01073735.2: 3.469-3.735 | 3' missing Pseudogene              |
| OA78B $\psi$                                     | ENSONIG00000008338        | AERX01073278.2: 2.515-4.762 | 3' missing Pseudogene              |
| OA78A $\psi$                                     | ENSONIG00000008336        | AERX01073278.2: 144-1.540   | 5'+3' missing Pseudogene           |
| <b>Spotted gar (<i>Lepisosteus oculatus</i>)</b> |                           |                             | <b>No Genbank ESTs</b>             |
| 501A1                                            | No ensembl gene ID        | JH591501: 64.610-66.685     | No data                            |
| 501B1                                            | No ensembl gene ID        | JH591501: 70.640-74.060     | No data                            |
| 501A2                                            | (ENSLACP00000000409)      | JH591501: 82.102-84.669     | No data                            |
| 501B2 $\psi$                                     | (ENSLACP00000000491)      | JH591501: 95.883-99.847     | 5'missing Pseudogene               |
| 501A3 $\psi$                                     | No ensembl gene ID        | JH591501: 120.683-125.781   | 5'+3'missing Pseudogene            |
| 615A                                             | (ENSLACP00000002396)      | JH591615: 5.333-9.156       | No data                            |
| 615B                                             | (ENSLACP00000000558)      | JH591615: 11.335-16.190     | No data                            |

+ both medaka alpha and beta transcripts are defined under ENSORLG00000009164. # = Number of ESTs available in NCBI EST Databases on 01.02.2012. id= amino acid identity of translated products, cov.= coverage, EST= expressed sequence tag, LG= linkage group, ORF= open reading frame, L= leader sequence; TM= transmembrane, CYT= cytoplasmic domain. Red font= bona fide gene with EST or cDNA support above 97% identity and 100% coverage in conserved alpha 2 or beta 2 domains. 5' and 3' missing referring to mature extracellular protein domain (ectodomain). For expressed genes GenBank accession numbers of one matching cDNA report are given between parentheses. Some genes encode very similar constant domains, which in our system leads to assignment of some cDNAs to more than one gene; future species-specific studies should make final assignments of transcript to locus by investigation of genomic DNA and cDNA of the same fish individual.

Table S2 MHC class II gene Ensembl IDs, Ensembl genomic locations, and number of matching cDNAs in GenBank
