# Supplementary material for: Comprehensive analysis of MHC class II genes in teleost fish genomes reveals dispensability of the peptide-loading DM system in a large part of vertebrates
Source: PubMed Central journal article supplement (PMC4219347; doi:10.1186/1471-2148-13-260), 2013-11-26
Supplement: 1471-2148-13-260-S6.pdf [file 1471-2148-13-260-S6.pdf]

### Supplementary Table 3 (Table S3). Conservation pattern of residues which contribute to the hydrogen-bond network between classical MHC class II molecules and the backbone of peptide ligands

The hydrogen-bond network by which the backbone of a peptide ligand is bound is structurally well conserved among investigated mammalian classical MHC class II structures [Painter CA, Stern LJ (2012) Conformational variation in structures of classical and non-classical MHCII proteins and functional implications. *Immunol Rev* 250:144-157]. This conserved network involves ten MHC class II residues, namely, five  $\alpha$  chain ( $\alpha 9$ ,  $\alpha 53$ ,  $\alpha 62$ ,  $\alpha 69$ ,  $\alpha 76$ ) and five  $\beta$  chain ( $\beta 57$ ,  $\beta 61$ ,  $\beta 71$ ,  $\beta 81$ ,  $\beta 82$ ) residues. Nine of these residues, all but  $\alpha 53$ , use their side-chain to interact with the peptide, and this table summarizes the residues found at those nine positions. Four of the residues have rather well conserved identities ( $\alpha 62N$ ,  $\alpha 69N$ ,  $\beta 81H$ ,  $\beta 82N$ ), and among these four  $\beta 82N$  was shown to be especially important [Zhou Z, et al. (2009) Cutting edge: HLA-DM functions through a mechanism that does not require specific conserved hydrogen bonds in class II MHC-peptide complexes. *J Immunol* 183(7):4187-4189].

In the table, residue distribution among (supposed) alleles is shown to allow a better estimation of the importance of particular residues. References are the IPD MHC database <http://www.ebi.ac.uk/ipd/mhc/> and articles listed below. Nx indicates the number of alleles compared followed by percentages of detected residues, with red and green fonts indicating representation in  $\geq 80\%$  and 50-80% of alleles, respectively. The residues  $\alpha 62N$ ,  $\alpha 69N$ ,  $\beta 81H$  and  $\beta 82N$  are rather specific for, and well conserved among, the classical class II molecules, and yellow shading highlights cases in which these consensus residues represent the majority among compared alleles. Residue  $\beta 61$  tends to be hydrophobic/aromatic in both classical and non-classical molecules, which is indicated by gray shading.

Tetrapod DM and teleost fish DB molecules tend to have hydrophobic residues at position  $\alpha 69$  which is very uncommon in the other class II lineages. Furthermore, at position  $\beta 81$  both lineages lack histidine which is the predominant residue throughout classical molecules. These shared features between tetrapod DM and teleost fish DB are highlighted by blue boxing. For teleost fish DE not many sequences are known yet and therefore we chose not to highlight their lack of  $\beta 81H$ .

Sequence references are as follows:

- (1) Ayane M, et al. (1986) *J Immunol* 137(3):948-952.
- (2) Chu ZT, et al. (1994) *Immunogenetics* 40(1):9-20.
- (3) Salomonson J, et al. (2003) *Immunogenetics* 55(9):605-614.
- (4) Liu Y, et al. (2002) *Dev Comp Immunol* 26(8):735-750.
- (5) Kasahara M, et al. (1993) *Eur J Immunol* 23(9):2160-2165.
- (6) Sultmann H, et al. (1993) *Immunogenetis* 38(6):408-420.
- (7) Hardee JJ, et al. (1995) *Immunogenetics* 41(4):229-238.
- (8) Karlsson L, et al. (1992) *J Exp Med* 176(2):477-483.
- (9) Wright H, et al. (1995) *Immunogenetics* 41(2-3):131-133.
- (10) Hermel E, et al (1995) *Immunogenetics* 42(2):136-142.
- (11) Chazara O, et al. (2011) *Mol Immunol* 48(9-10):1263-1271.
- (12) Ohta Y, et al. (2006) *J Immunol* 176(6):3674-3685.
- (13) Human DRB1 sequences analyzed are representatives listed in Table I in the article by Southwood S, et al. (1998) *J Immunol* 160(7):3363-3373.
- (14) Begovich AB, et al. (1990) *J Immunol* 144(5):1957-1964.
- (15) Estess P, et al. (1986) *Proc Natl Acad Sci USA* 83(11):3594-3598.
- (16) Alcaide M, et al. (2008) *Mol Ecol* 17(11):2652-2665.
- (17) Kobari F, et al. (1995) *Immunogenetics* 42(5): 376-385.
- (18) Bartl S, Weissman IL (1994) *Proc Natl Acad Sci USA* 91(1):262-266.
- (19) Wang DQ, He SP (2009) GenBank accessions ACZ26346-8.
- (20) Graser R, et al. (1996) *Immunogenetics* 44(1):36-48.
- (21) Ono H, et al. (1993) *Mol Biol Evolution* 10(5):1060-1072.
- (22) Karlsson L et al. (1991) *Nature* 351(6326):485-488.
- (23) Wright H, et al. (1996) *Immunogenetics* 43(1-2):76-79.

MHC class II  $\alpha$ 

| Classical                                              | alpha9 (various)                        | alpha62 (N)                                                     | alpha69 (N)                                                         | alpha76 (various)                                         |
|--------------------------------------------------------|-----------------------------------------|-----------------------------------------------------------------|---------------------------------------------------------------------|-----------------------------------------------------------|
| Ref.:                                                  |                                         |                                                                 |                                                                     |                                                           |
| <b>Mammalian classical</b>                             |                                         |                                                                 |                                                                     |                                                           |
| IPD Human DRA1                                         | 7x: Q 100%                              | 7x: N 100%                                                      | 7x: N 100%                                                          | 7x: R 100%                                                |
| 1 Mouse I-Ea                                           | 3x: Q 100%                              | 3x: N 100%                                                      | 3x: N 100%                                                          | 3x: R 100%                                                |
| IPD Rat Rt1-Da                                         | 3x: Q 100%                              | 3x: N 100%                                                      | 3x: N 100%                                                          | 3x: R 100%                                                |
| IPD Sheep DRA                                          | 3x: Q 100%                              | 3x: N 100%                                                      | 3x: N 100%                                                          | 3x: R 67%, Y 33%                                          |
| IPD Pig DRA                                            | 13x: Q 100%                             | 13x: N 100%                                                     | 13x: N 100%                                                         | 13x: R 100%                                               |
| IPD Human DPA1                                         | 30x: Y 100%                             | 36x: N 100%                                                     | 36x: N 97%, D 3%                                                    | 36x: R 97%, H 3%                                          |
| IPD Human DQA1                                         | 49x: G 100%                             | 49x: N 100%                                                     | 49x: N 100%                                                         | 49x: R 98%, C 2%                                          |
| 2 Mouse I-Aa                                           | 8x: G 100%                              | 8x: N 87%, E 13%                                                | 8x: N 87%, T 13%                                                    | 8x: R 100%                                                |
| IPD Rat Rt1-Ba                                         | 3x: G 100%                              | 3x: N 33%, E 33%, S 33%                                         | 3x: N 100%                                                          | 3x: R 67%, K 33%                                          |
| IPD Cattle DQA                                         | 58x: G 100%                             | 60x: N 63%, E 35%, D 2%                                         | 60x: N 83%, T 13%, H 2%, D 2%                                       | 60x: R 82%, L 7%, E 5%, G 2%, F 2%, Y 2%, C 1%            |
| IPD Pig DQA                                            | 20x: G 100%                             | 20x: N 95%, T 5%                                                | 20x: N 85%, T 15%                                                   | 20x: R 95%, C 5%                                          |
| IPD Dog DQA1                                           | 16x: G 100%                             | 16x: N 100%                                                     | 16x: N 100%                                                         | 16x: R 87%, S 13%                                         |
| <b>Bird classical</b>                                  |                                         |                                                                 |                                                                     |                                                           |
| 3 Chicken BLA                                          | 2x: Q 100%                              | 2x: N 100%                                                      | 2x: N 100%                                                          | 2x: N 100%                                                |
| <b>Amphibian classical</b>                             |                                         |                                                                 |                                                                     |                                                           |
| 4 Xenopus DAA                                          | 4x: G 100%                              | 4x: N 75%, Q 25%                                                | 4x: N 100%                                                          | 4x: S 100%                                                |
| 4 Xenopus DBA                                          | 4x: G 100%                              | 4x: D 50%, E 25%, N 25%                                         | 4x: N 100%                                                          | 4x: R 75%, V 25%                                          |
| <b>Elasmobranch classical</b>                          |                                         |                                                                 |                                                                     |                                                           |
| 5 Nurse shark DAA                                      | 6x: Q 100%                              | 6x: N 100%                                                      | 6x: N 100%                                                          | 6x: L 100%                                                |
| <b>Teleost fish classical</b>                          |                                         |                                                                 |                                                                     |                                                           |
| IPD Salmon DAA                                         | 18x: V 39%, A 39%, Y 11%, H 11%         | 21x: N 100%                                                     | 21x: N 100%                                                         | 21x: A 100%                                               |
| IPD Trout DAA                                          | 3x: Y 67%, A 33%                        | 3x: N 67%, D 33%                                                | 3x: N 67%, D 33%                                                    | 3x: A 100%                                                |
| 6 Zebrafish DAA                                        | 3x: D 67%, V 33%                        | 3x: N 33%, D 33%, Q 33%                                         | 3x: N 67%, D 33%                                                    | 3x: A 100%                                                |
| 7 Striped bass IIA                                     | 7x: H 42%, R 29%, A 29%                 | 7x: N 86%, Q 14%                                                | 7x: N 100%                                                          | 7x: A 100%                                                |
| Highly expressed DA group genes as indicated in Fig. 2 | 6x: A 50%, V 17%<br>G 17%, Q 17%        | 6x: N 50%, Q 34%, E 17%                                         | 6x: N 100%                                                          | 6x: A 83%, G 17%                                          |
| <b>Non-classical</b>                                   |                                         |                                                                 |                                                                     |                                                           |
| <b>Mammalian DO</b>                                    |                                         |                                                                 |                                                                     |                                                           |
| IPD Human DOA                                          | 11x: G 100%                             | 11x: G 100%                                                     | 11x: H 100%                                                         | 11x: R 100%                                               |
| 8 Mouse DOA                                            | 6x: G 100%                              | 6x: S 100%                                                      | 6x: H 100%                                                          | 6x: R 100%                                                |
| IPD Rat RT1-DOa                                        | 2x: G 100%                              | 2x: S 100%                                                      | 2x: H 100%                                                          | 2x: R 100%                                                |
| 9 Sheep DOA                                            | 1x: G 100%                              | 1x: S 100%                                                      | 1x: H 100%                                                          | 1x: R 100%                                                |
| <b>Tetrapod DM</b>                                     |                                         |                                                                 |                                                                     |                                                           |
| IPD Human DMA                                          | 5x: H 100%                              | 5x: D 100%                                                      | 5x: M 100%                                                          | 5x: K 100%                                                |
| IPD Rat DMA                                            | 2x: H 100%                              | 2x: D 100%                                                      | 2x: L 100%                                                          | 2x: R 100%                                                |
| 10 Mouse DMA                                           | 1x: H 100%                              | 1x: D 100%                                                      | 1x: L 100%                                                          | 1x: K 100%                                                |
| IPD Pig DMA                                            | 4x: Y 100%                              | 4x: D 100%                                                      | 4x: M 100%                                                          | 4x: L 100%                                                |
| 11 Chicken DMA                                         | 1x: E 100%                              | 1x: D 100%                                                      | 1x: L 100%                                                          | 1x: I 100%                                                |
| 12 Xenopus DMA                                         | 1x: Q 100%                              | 1x: D 100%                                                      | 1x: A 100%                                                          | 1x: A 100%                                                |
| Teleost fish nonclassical                              |                                         |                                                                 |                                                                     |                                                           |
| <b>Teleost DB group</b><br>all intact in Text S4.4     | 15x: Y 40%, L 27%,<br>F 20%, H 7%, V 7% | 15x: S 47%, N 14%, L 14%,<br>A 14%, Y 7%, I 7%, G 7%<br>(N=13%) | 15x: V 33%, Y 13%, I 13%,<br>F 13%, D 7%, C 7%, L 7%, A7%<br>(N=0%) | 15x: A 27%, L 27%, E 13%,<br>V 7%, S 7%, P 7%, Q 7%, F 7% |
| <b>Teleost DE group</b><br>all in Text S4.4            | 1x: F 100%                              | 2x: D 50%, S 50%<br>(N=0%)                                      | 2x: N 100%<br>(N=100%)                                              | 2x: G 50%, R 50%                                          |

Table S3 Conservation of peptide backbone binding residues

MHC class II  $\beta$ 

| Classical                                              | beta57 (various)                                         | beta61 (hydrophobic)                           | beta71 (various)                                     | beta81 (H)                                                                    | beta82 (N)                                                       |
|--------------------------------------------------------|----------------------------------------------------------|------------------------------------------------|------------------------------------------------------|-------------------------------------------------------------------------------|------------------------------------------------------------------|
| Ref:                                                   |                                                          |                                                |                                                      |                                                                               |                                                                  |
| <b>Mammalian classical</b>                             |                                                          |                                                |                                                      |                                                                               |                                                                  |
| 13 Human DRB1                                          | 10x: D 70%, V 30%                                        | 10x: W 100%                                    | 10x: R 60%, K 20%<br>E 10%, A 10%                    | 10x: H 100%                                                                   | 10x: N 100%                                                      |
| 14 Mouse I-Eb                                          | 8x: D 87%, E 13%                                         | 8x: W 100%                                     | 8x: K 50%, A 25%,<br>R 13%, T 13%                    | 8x: H 87%, Y 13%                                                              | 8x: N 100%                                                       |
| IPD Rat RT1-Db1                                        | 4x: S 50%, D 25%, I 25%                                  | 4x: Y 50%, L 25%, R 25%                        | 4x: E 25%, A 25%,<br>L 25%, R 25%                    | 4x: H 100%                                                                    | 4x: N 75%, D25%                                                  |
| IPD Cattle DRB3                                        | 130x: D 65%, V 15%,<br>S 10%, A 10%                      | 130x: W 91%, L 8%, C 2%                        | 130x: K 41%, R 29%,<br>E 22%, A 7%, G 1%             | 130x: H 93%, Y 7%                                                             | 130x: N 100%                                                     |
| IPD Sheep DRB1                                         | 77x: D 53%, S 36%,<br>E 6%, A 3%, G1%                    | 77x: W 100%                                    | 77x: R 44%, K 29%,<br>A 17%, T 10%                   | 77x: H 100%                                                                   | 77x: N 100%                                                      |
| IPD Pig DRB1                                           | 80x: D 74%, V 9%,<br>S 8%, E 6%, F 4%                    | 80x: W 86%, Y 11%, R 3%                        | 80x: R 55%, K 21%,<br>S 15%, M 8%                    | 60x: H 98%, Y 2%                                                              | 57x: N 98%, D 2%                                                 |
| IPD Dog DRB1                                           | 52x: D 81%, V 12%,<br>I 4%, S 4%                         | 52x: W 100%                                    | 52x: R 37%, K 27%,<br>E 25%, A 10%, G 2%             | 52x: H 100%                                                                   | 52x: N 100%                                                      |
| IPD Cat DRB                                            | 20x: D 65%, I 20%, T 15%                                 | 20x: W 70%, L 20%, M 10%                       | 20x: K 30%, T 20%, R 15%,<br>E 15%, S 15%, A 5%      | 20x: H 100%                                                                   | 20x: N 100%                                                      |
| IPD Human DPB1                                         | 155x: D 52%, A 36%, E12%                                 | 155x: W 100%                                   | 155x: K 64%, E 34%, R 4%                             | 155x: H 100%                                                                  | 155x: N 100%                                                     |
| IPD Human DQB1                                         | 177x: D 62%, V 17%,<br>A 16%, S 5%                       | 177x: W 100%                                   | 176x: T 69%, A 16%,<br>D 8%, K 7%                    | 173x: H 99%, P 1%                                                             | 173x: N 99%, S 1%                                                |
| 15 Mouse I-Ab                                          | 6x: D 100%                                               | 6x: W 50%, Y 50%                               | 6x: T 100%                                           | 6x: H 100%                                                                    | 6x: N 100%                                                       |
| IPD Rat RT1-Bb                                         | 3x: S 100%                                               | 3x: F 67%, Y 33%                               | 3x: T 100%                                           | 3x: H 100%                                                                    | 3x: N 100%                                                       |
| IPD Cattle DQB                                         | 82x: D 60%, A 23%, Q 6%,<br>S 5%, T 2%, H 1%, E 1%, P 1% | 82x: W 73%, F 27%                              | 82x: T 74%, V 13%,<br>R 10%, A 1%                    | 82x: H 70%, N 29%, Y 1%                                                       | 82x: N 100%                                                      |
| IPD Pig DQB1                                           | 44x: D 43%, E 25%,<br>T 16%, A 14%, G 2%                 | 44x: W 86%, L 14%                              | 44x: T 59%, K 36%,<br>M 9%, A 5%                     | 44x: H 100%                                                                   | 44x: N 100%                                                      |
| IPD Dog DQB1                                           | 36x: D 53%, S 19%,<br>V 17%, W 11%                       | 36x: W 100%                                    | 36x: V 50%, R 19%,<br>K 19%, E 11%                   | 36x: H 100%                                                                   | 36x: N 100%                                                      |
| <b>Bird classical</b>                                  |                                                          |                                                |                                                      |                                                                               |                                                                  |
| 16 Lesser kestrel DAB*1                                | 98x: T 79%, D 11%, A 10%                                 | 98x: W 56%, F 36%, L 7%                        | 98x: R 39%, A 34%,<br>K 27%, T 1%                    | 98x: H 100%                                                                   | 98x: N 100%                                                      |
| <b>Amphibian classical</b>                             |                                                          |                                                |                                                      |                                                                               |                                                                  |
| 17 Xenopus IIB                                         | 6x: Q 50%, D 33%, S 17%                                  | 6x: W 100%                                     | 6x: K50%, T 17%,<br>H 17%, Y 17%                     | 6x: H 67%, Y 33%                                                              | 6x: N 100%                                                       |
| <b>Elasmobranch classical</b>                          |                                                          |                                                |                                                      |                                                                               |                                                                  |
| 18 Nurse shark DAB                                     | 2x: N 100%                                               | 2x: W 100%                                     | 2x: Q 100%                                           | 2x: H 100%                                                                    | 2x: N 100%                                                       |
| <b>Primitive ray-finned fish (classical?)</b>          |                                                          |                                                |                                                      |                                                                               |                                                                  |
| 19 Paddlefish (DE-lineage)                             | 3x: N 100%                                               | 3x: W 100%                                     | 3x: L 100%                                           | 3x: H 67%, R 33%                                                              | 3x: N 100%                                                       |
| <b>Teleost fish classical</b>                          |                                                          |                                                |                                                      |                                                                               |                                                                  |
| IPD Salmon DAB                                         | 42x: N 100%                                              | 42x: W 98%, L 2%                               | 42x: E 93%, A 7%                                     | 42x: H 71%, L 19%,<br>F 7%, Q 2%                                              | 42x: N 100%                                                      |
| IPD Trout DAB                                          | 19x: N 100%                                              | 19x: W 79%, R 5%, L 16%                        | 19x: E 89%, M 11%                                    | 19x: H 68%, P 32%                                                             | 19x: N 95%, S 5%                                                 |
| 20 Zebrafish DAB                                       | 11x: F 82%, C 9%, S 9%                                   | 11x: F 91%, L 9%                               | 11x: L 73%, R 9%,<br>E 9%, W 9%                      | 11x: H 82%, N 18%                                                             | 11x: N 100%                                                      |
| 21 Tilapia zebra DAB                                   | 14x: N 57%, Q 21%,<br>Y 14%, T 7%                        | 14x: W 79%, F 21%                              | 14x: W 36%, M 14%, D 14%,<br>V 14%, E 7%, R 7%, L 7% | 14x: H 79%, P 14%, N 7%                                                       | 14x: N 100%                                                      |
| Highly expressed DA group genes as indicated in Fig. 2 | 4x: N 50%, F 25%, T 25%                                  | 4x: W 50%, F 25%, A 25%                        | 4x: E 50%, R25%, L 25%,                              | 4x: H 100%                                                                    | 4x: N 100%                                                       |
| <b>Non-classical</b>                                   |                                                          |                                                |                                                      |                                                                               |                                                                  |
| <b>Mammalian DO</b>                                    |                                                          |                                                |                                                      |                                                                               |                                                                  |
| IPD Human DOB                                          | 13x: D 100%                                              | 13x: W 100%                                    | 13x: S 100%                                          | 13x: H 100%                                                                   | 13x: N 100%                                                      |
| 22 Mouse DOB                                           | 3x: D 100%                                               | 3x: W 100%                                     | 3x: S 100%                                           | 3x: Q 100%                                                                    | 3x: K 100%                                                       |
| IPD Rat DOB                                            | 1x: D 100%                                               | 1x: W 100%                                     | 1x: S 100%                                           | 1x: Q 100%                                                                    | 1x: E 100%                                                       |
| 23 Sheep DOB                                           | 1x: D 100%                                               | 1x: W 100%                                     | 1x: S 100%                                           | 1x: R 100%                                                                    | 1x: N 100%                                                       |
| <b>Tetrapod DM</b>                                     |                                                          |                                                |                                                      |                                                                               |                                                                  |
| IPD Human DMB                                          | 11x: L 100%                                              | 11x: L 100%                                    | 11x: R 100%                                          | 11x: T 100%                                                                   | 11x: H 100%                                                      |
| 10 Mouse DMB (1+2)                                     | 7x: I 86%, N 14%                                         | 7x: I 100%                                     | 7x: R 100%                                           | 7x: T 86%, S 14%                                                              | 7x: H 100%                                                       |
| IPD Rat DMB                                            | 2x: I 100%                                               | 2x: L 100%                                     | 2x: R 100%                                           | 2x: T 100%                                                                    | 2x: H 100%                                                       |
| 11 Chicken DMB (1+2)                                   | 2x: L 100%                                               | 2x: L 100%                                     | 2x: R 100%                                           | 2x: E 50%, K 50%                                                              | 2x: L 100%                                                       |
| 12 Xenopus DMB                                         | 1x: I 100%                                               | 1x: L 100%                                     | 1x: R 100%                                           | 1x: A 100%                                                                    | 1x: Q 100%                                                       |
| Teleost fish nonclassical                              |                                                          |                                                |                                                      |                                                                               |                                                                  |
| <b>Teleost DB group</b><br>all intact in Text S4B      | 15x: F 33%, W 13%, S 13%,<br>I 13%, T 13%, L 7%, V 7%    | 15x: L 27%, F 27%, Y 20%,<br>W 13%, A 7%, V 7% | 15: R 40%, Q 20%,<br>H 13%, A 13%, L 13%             | 15x: T 20%, R 13%, K 13%,<br>L 13%, P 7%, D 7%,<br>S 7%, V 7%, E 7%<br>(H=0%) | 15x: N 33%, I 13%, L 13%,<br>F 13%, S 13%, Y 7%, H 7%<br>(N=33%) |
| <b>Teleost DE group</b><br>all in Text S4B             | 2x: N 100%                                               | 2x: Y 100%                                     | 2x: R 100%                                           | 2x: Y 50%, A 50%<br>(H=0%)                                                    | 2x: N 50%, S 50%<br>(N=50%)                                      |

Table S3 Conservation of peptide backbone binding residues
