# Supplementary material for: Comprehensive analysis of MHC class II genes in teleost fish genomes reveals dispensability of the peptide-loading DM system in a large part of vertebrates
Source: PubMed Central journal article supplement (PMC4219347; doi:10.1186/1471-2148-13-260), 2013-11-26
Supplement: 1471-2148-13-260-S7.pdf [file 1471-2148-13-260-S7.pdf]

**Supplementary Text 1 (Text S1).** Deduced MHC class II amino acid sequences of teleost fish and gar from Ensembl database<sup>a</sup> and matching GenBank cDNA reports<sup>b</sup>

| Table of Contents                                        | Page |
|----------------------------------------------------------|------|
| Zebrafish ( <i>Danio rerio</i> )                         |      |
| Ensembl sequences                                        | 2    |
| Translated Genbank cDNA report sequences                 | 4    |
| Stickleback ( <i>Gasterosteus aculeatus</i> )            |      |
| Ensembl sequences                                        | 5    |
| Translated Genbank cDNA report sequences                 | 7    |
| Medaka ( <i>Oryzias latipes</i> )                        |      |
| Ensembl sequences                                        | 7    |
| Translated Genbank cDNA report sequences                 | 8    |
| Fugu ( <i>Takifugu rubripes</i> )                        |      |
| Ensembl sequences                                        | 9    |
| Translated Genbank cDNA report sequences                 | 10   |
| Tetraodon ( <i>Tetraodon nigroviridis</i> )              |      |
| Ensembl sequences                                        | 10   |
| Translated Genbank cDNA report sequences                 | 11   |
| Tilapia ( <i>Oreochromis niloticus</i> )                 |      |
| Ensembl sequences                                        | 11   |
| Translated Genbank cDNA report sequences                 | 16   |
| Spotted gar ( <i>Lepisosteus oculatus</i> ) <sup>c</sup> |      |
| PreEnsembl sequences                                     | 17   |

<sup>a</sup>Deduced amino acid sequences of the MHC class II genes in the Ensembl database which were analyzed in the present study (as listed in Table S2, Fig. S2 and main text Fig. 2)

<sup>b</sup>Deduced amino acid sequences of GenBank cDNA reports, used for comparison and estimation whether the class II loci reported in the Ensembl database are expressed (see Table S2); not all matching cDNA reports are shown, but at least one match with above 97% constant domain sequence identity for each expressed gene and in a few cases additional matches suggestive of polymorphism

<sup>c</sup>For spotted gar no MHC class II cDNA reports were found in GenBank.

## Zebrafish (*Danio rerio*) MHC class II sequences

### Zebrafish Ensembl sequences:

>D4B\_DFB ENSDARG00000054921\_ENSDARP00000071675\_4:61874514-61880599  
MSPANLLMLSVFTGAADGYYFSTWSQCIYSYPDLSDMVFI LSFNFKWMFLQFNSTVGI  
FVGYTEQGVKFAENFNKNEAYLQQLRAEVDIFCRHNAEIIYESAVFDKAVMPKVNLSLVQK  
GDSRHPYLLRCSAYDFYPPQQIKMSWLRDGRVVSVDVTSSEQMPNGDWYYQSHSELVFSFKS  
GETISCMVEHSSLTGFPVVIDWKPPVHEFEWDFQLLSAAGDASAVLGII IATAGYIYYKTK  
TEKNLVAIY

>D4A ENSDARG00000020286\_ENSDARP00000018440\_4:61887203-61893205  
FVPASPAKMELLYLLLLLAFTVVLSTHARVKHNLFMFNGCSDTEKEALYGSEGEEMWHSDF  
KLKQGVATLPEFADPLSFPGAYEESVADQEVCKQNLATSIIKAYNSPPEEMEPETSIIYPR  
NEVLLGVDNVLICHVTGFFPPPVDVSWSRNNVKVTEGVDVVSQYRPRSDQTFHMFSSLKIR  
PAAGDIYGCTVNHAAALQEQPQTKLWVVPQGGVLSPLCLTPVLLSGLGFTVGLLGLATGIYF  
FIKGSTADVSDTAVSKKKLMQFYQ

>D8.35B1 ENSDARG00000093706\_ENSDARP00000104158\_8:35956336-36146143  
MCSAYDFYPPHINVFWRNGEVMTSEVTSTMEMADGDWYYQIHSELEYSKPKGERISCVI  
EHASSNKPMIYDWDPSLPVFERNKISIGVSALVVLGIIITAAAGI IYYKKKTTGRTSVPSR  
LITLPLMFGR

>D8.35B2 ENSDARG00000053738\_ENSDARP00000070311\_8:35956359-35959768  
MSQKKLYSSLILILALFFVGESANVYYMYRVSRCIFSSSNISAMVYFDRTYFNKNLFIQF  
NSNLGRFEGFNEYGLKLAEFWNNGTFFVDQEKDVVEFFCKYNSQIYENSILDKAVKPKVKL  
SSVTRAGGRQSTVLMCSAYDFYPPHINVFWRNGEVMTSEVTSTMEMADGDWYYQIHSEL  
EYSPKPKGERISCVIEHASSNKPMIYDWDPSLPVFERNKISIGVSALVVLGIIITAAAGI IY  
KKKTTGRTSVPSRLITLPLMFGR

>D8.35A1 ENSDARG00000053739\_ENSDARP00000070315\_8:36131728-36140054  
TLTLLSTHAEIVHDYFSIHGCSYTDDEEGMQAVDGEDMHGIDNEEMWHADYNLKTGVLSL  
PDFGDPITFPRFYETSVIEMTGCKANIVSLTKIFNSPPPEMDPPQTSIYPKDDVELGVQN  
TLVCHATGFYPPSIRILWMTMNNVNVTEGISLSQYRPRVDGTFNIFSTFRFTPAEGDIYSC  
RVIHEALLGQPQAKIYDVDVAIPSVGSPVFCGVALSLGLLGIIVTGTFFFIFKAFNYNDME  
VN

>D8.35A2 ENSDARG00000055441\_ENSDARP00000072260\_8:36283500-36286998  
MELYITTLVLTII LSAGAKVVHEDFAIRGCSDETEKEDTYGMDEEELWHADFNQKGVETL  
PDFGDPMTFPGFYEGSEGEEMAVCKSNLALRIKGFKSPPPEMDAPQTSIYPKDDVELGVQN  
TLVCHVTGFYPPSVSVSWTKNNINVEDITLSQYRPRIDGTFNIFSTLKFPTPAEGDIYSC  
MVKHRAIKDQPQTKTWDVDAVLPSVGPVFCGIGLTLGLLGVAVGTFFLVKGNNCN

>D8.35B3 DEB ENSDARG00000055447\_ENSDARP00000072268\_8:36288188-36289984  
MLPLKYFTCLMLTVSLFTGAESANVYYTYRWCRCIYSSPDLSDMVYIDSKYFNKYLFAQF  
NSTLGRYVGFSEYGIRNAEYWNNGTFVEQERNEVERFCKHNAQIRDSAVISKAVKPKVKL  
SSVTRAGGRHPAVLMCSAYDFYPPHIKISWLRDQVVTSDVTSSTEMADGDWYYQIHSEL  
EYSPKSGEKISCAVEHASSTKPIIYDWDPSFSESEKNKLVIGASGLVVLGIVLAAAGLIY  
KKKSTGRILVPH

>D8.37A1 ENSDARG00000074816\_ENSDARP00000100115\_8:37465644-37474349  
MELHIIILSLAIVLSTGTEFEHEVNQIQVCSNTEQEFFIGYDGEIWHADIAHRRGVKTT  
PSFAQYAVIPDIYERALAFDFCKYDLHAYIKYFNNPPPEMDAPQTSIYKGNVQLGIQN  
TLVCHVTGFYPPFVNISWTKNNVIVTEGMSLSQYHPRVDGTFNIFSTLKYTPAEGDIYSC  
TVNHRTLQGGPQTRIDVDVVLNPNFGPSVFCGVLTIGLLSVAIETFFLFKRKSN

>D8.37B1 ENSDARG00000074510\_ENSDARP00000116857\_8:37476789-37482114  
XDFWARFSRYSERVKMSLLRLFYGHILTLVSLIGAETANVYYRYTWIQCISSSKNLSDM  
VFIESLYFNKYLFTQFNSNIGKYVGFSEYGIRNAEFRNNDTNLLKKKA AVNKVCKNNAI  
NHDKFIRNKAVKPKVKLTLVKPAGGRHPAVLMCSAYEFYPPHIRVYWRNGEVITSDVTS  
TMEMADGDWYYQIHSELEYSKPKGERISCGIEHASSNKPIITEWDSRPASERNKIAIGA  
SG

>D8.37A2 ENSDARG00000070206\_ENSDARP00000093621\_8:37488525-37498906

MELVIVVLTFFIAFLSSNAEFVREELEIYVCSSESEAMVGADGEELWHADFKQKTGIITL  
 PDFADRIGFPGFYEISVDSIAGCRRNLANNIRGFKSPPPAMDAPHSSVYPKDDVELGVQN  
 SLICHATGFYPPSITISWKKNNNNVTEINLSQYRPRADGSFNIFSTLKFTPAEGDIYSC  
 TVNHEALQGQAQTKTWDVDVALPSAFPVAVCGVGVFGLLGIAAGTFLLVKGNCN  
 >D8.37B2\_DDB ENSDARG00000076307\_ENSDARP00000097822\_8:37510422-37511403  
 MLICSAYEFYPRHIKVSWLKGGKSVTSEVTSTEMADGDWYYQIHSELEYTPGPGEKISC  
 LVEHASSSEPMIYDWDPSLPESERNKIAVGASGLVMGFIIAAVGILYRKKSTGMIPHP  
 >D8.37A3 ENSDARG00000031745\_ENSDARP00000048447\_Chr8:37539907-37543263  
 MDLFGFLLIFTVIVSNGAQAEHKDFGFVGCSDMEKEFLFGFDGEELFHLDFIRKEGVATA  
 PDFADPLSFPGFYEAQVMEVCKQNLATDIRAYNSPQEQLDPPVTSIYSKDEVVLDKKN  
 TLICHVTGFFPPPVPVNSWTKNNDIVLEEISFSQYRENSDGTFMFSAKFTPAEGDIYSC  
 TVKHRSIQGQNTKTWEVDVELPSVGPVAVFCVGLVGLLGVAAAGTFFFLIKGNNCN  
 >D8.37B3\_DAB ENSDARG00000079105\_ENSDARP00000100252\_8:37546100-37548453  
 MYLLKPFLVILMLSTFTGTADGYDYIKQQCFYSTSDYSMDVYLASYFNKVVDTFQNSS  
 VGKFGVGYTEQGLIFAENFNKDQAYLHQLKAQVDTFCRHNAQIWDASAVRDKAVLPEVTIKS  
 VRQAEGRHPAVLLCSAYEFYPKKIKMSWLRDGGKEVTSVDTSTEMADGDWYYQIHSHLEY  
 TPKSGEKIQCLVEHASLTQPLTKDWNPHISESDRNKFAIGASGLVGLGIIIAIAGLIYYKK  
 KSTGRILVFN  
 >D8.37A4 ENSDARG0000001832\_ENSDARP00000043524\_8:37574076-37576393  
 MDLFGFLLIFTVIVSNGAQAEHRDFQFTGCSDETEKDDLNDFDGEVLYYTDFFIRKEGVVIA  
 PDFADPLSFPGGYETGVAQMEVCKQNLATDIKAYNSPQEQLDPPVTSIYSEDEVVLDKKN  
 TLICVYTGFFPPPVPVNSWTKNNDIVTEDISFSQYRDNDSGTFMFSAKFTPAEGDIYSC  
 TVKHRSIQGQNTKTWEVDVELPSVGPVAVFCVGLVGLLGVAAAGTFFFLIKGNNCN  
 >D8.45B1 ENSDARG00000041705\_ENSDARP00000088910\_8:45758566-45761489  
 MNKINYSLAAVFLSALFETVHAYTYAQIQCHVSDSLQKIEFIFSVTYNMIELVRYNST  
 EDTFFGYTAIGQKFAEYENKDKVLLAQHDFVLNQCRELGDVILPNAVWLVAVKPEVIIRSV  
 TEAKGNRKAVLVCSAYDFYPKGIKLTWMRDDKKTVAELTSSEVMADGHWHYQIHSYLEYF  
 PQTGEKISCVVDHASSLKPMIYYWDPSPLESERSKIILGAVGLLMGIFTAAAGVIYYKRK  
 QTGFYRLPVCLLPMETMNDTELQ  
 >D8.45A1 ENSDARG00000079593\_ENSDARP00000061131\_8:45768098-45769605  
 MFKTFSGITFFIFCLIHTEGQSYPEFGFIETCRGSSYDKIVFILDTEEAAYKDIEKEKLV  
 FTLPDMANPQYSLNLDRLNDVGIAPFCTEIIYHKILSLNVSEDETEPLEPPWTTVYSRNDVK  
 LNVKNTLICHVTGFFPPPVRVLWTKNNVNTDGSTISRYYPNKDGTMNVSRLSFIPEEG  
 DVYGCSEVHKALQQPQTRTWDVEVQQPSIGPSVFCVGLALGLGFATGVLFIAGKGLCK  
 >D8.45B2 DCB ENSDARG00000088872\_ENSDARP00000110668\_8:45773380-45774524  
 MQFSRVAACLAMILSALLEKVCNGYGLQSQCRVLSSTKKVELIFSFIENKIEYIRYNSTD  
 QKIVGYTEFGEKFVENYKNNTFVLVLAEFIDNCKKIAKALISDGMNLNHVTVKPEVIIRS  
 VTEAKGNQKAVLVCSAYDFYPKAIKLTWMRNDKKTADVMSEEMADGDWYYQIHSHLEY  
 FPQPGEKISCVVDHASFHKPMIYYWDPSPLETERSKIILGAVGLLMGIFTAAAGVIYYKR  
 KQTG  
 >D8.45A2 ENSDARG00000086294\_ENSDARP00000112102\_8:45778095-45779781  
 MLVYSSDHSIVELTQANMLELLCRIMLFIAIYWTCSSEGQMDLEYGLMESCTGSPDDEIVFT  
 FNTELAAYLVVVDGTLVLTVPNFIDYPGFYELPLLDASPATVGLTALCKVVYEKTLNLN  
 VSEPLEPPVLLYPRNDVKLNKNTLICHVTGFFPPPVRVLWTKNNVNTDGSTISRYYP  
 DNDRNFNVFSQLSFIPEEGDVYSCSVEHKALQQPQTRTWDVEVKQPSIGPSVFCVGLAF  
 GLLSFAAGIFFNAKGGKWM  
 >D8.46A ENSDARG00000075932\_ENSDARP00000010619\_8:47078720-47080882  
 MEALLRITLICVVCQAKDYHKYGLIGACGDADQEDFIVQFDDEQLAHVDFKEQKDVITLP  
 EFAGQAVLPPIYVDAKRAEFNCKAYLAVLREYVASSPEVLEPPWSSIYPKSDPQLNLKNT  
 LICHVTGFFPPPVRVLWTKNNVNTDGSTISRYYPNKDGTMNVSRLSFIPEEGDIYSCS  
 VEKALQQPQTRTWDVEVKQPSIGPSVFCVGLALGLLGFATGVFFTAAGNNCN  
 >D18B ENSDARG00000056330\_ENSDARP00000090055\_Chr18:29872428-29875206  
 MFNVLVIRLALLLPFLLETAGHYGFVQFTCHMLGSLQNVEVTYSIYFDTTELLRFNSTE  
 NKAVAYTEYAMKWANDLNKQPKWLHEQVEKNIADCKLFGETYFPLVAKTVKPEVFRSLR  
 EASGKRPALLSCSAYNFYPKHIKLTWMRDDKVVADVMSTKVMADGDWYYQIHSHLEYFP  
 QPGEKISCVVEHASSHKPMIYYWDSFLTESNKNKIITGAAGIVLGAIMAAGGLIYYKRKH  
 TVKSHVHVLIIY

>D18A ENSDARG0000093885\_ No ENSDARP\_18:29867551-29868594  
 DYHKYGLIGASGDADQEDFIVQFDDEQLAHVDFKEQKDVITLPEFADLAVFQPLYVDAKR  
 AFNGKAFLAVLREYVYASSPEVLEPPLSSIIYPKSDPQLNVKNTLICQVTGFFPPVVRVLWT  
 KNNVNVTDGSTISRYYPNKDGTMNVFS\*LSFIPEEGDIHSCSCLVEHKALQQPQTRTW

### Zebrafish translated Genbank cDNA report sequences:

>EH441901 FDR103-P00029-DEPE-F\_E20 FDR103 Danio rerio cDNA clone FDR103-  
 P00029-BR\_E20 5, mRNA sequence D18B match  
 MLGSLQNVEVTYSIYFDTELLRFNSTENKAVAYTEYAMKWANDLNKQPKWLHEQVEKNI  
 ADCKLFGETYFPLVAKTVKPEVVFVRSLEASGKRPAALLSCSAYNFYPKHILKLTWMRDDKV  
 VTADVMTKVMADGDWYQIHSLEYFPQPGEKISCVEHASSHKPMIYYWDSFLTESNK  
 NKIITGAAGIVLGAIMAAGGLIYYKRKHTVKSHVHVLIIY  
 >EB769231.1\_1 2026670 AG03 Danio rerio cDNA clone 770142, mRNA sequence D4B  
 match  
 FDKAVMPKVNLSLVQKGDSRHPYLLRCSAYDFYPQQIKMSWLRDGRVVS DVTSSSEQMPNG  
 DWYYQSHSELVFS PKSGETISCMVEHSSLTGPPVIDWKPPVHEFEWDFQLLSAAGDAXAX  
 LXXXIV  
 >DT061156.1\_3 AGENCOURT\_56110132 NIH\_ZGC\_10 Danio rerio cDNA clone  
 IMAGE:8000694 5', mRNA sequence D8.37B3 match  
 FLVILMLSTFTGTADGYDYDIKQQCFYSTSDYS DMVYLASYSFNKVVDTQFNSSVGKFGV  
 YTEQGLIFAENFNKDQAYLHQLKAQVDTFCRHNAQIWD SAVORDKAVLPEVTIKSVRQAEG  
 RHPAVLLCSAYEFYPPKIKMSWLRD GKEVTS DVTSTMEMADGDWYQIHSLEYTPKS GE  
 KIQCLVEHASLTQPLTKDWNPHISESDRNKFAIGASGLVLGIIIAIAGLIYYKKKSTGRI  
 LVQTDSSSESNT  
 >DN896667.1\_2 nap12d02.y1 Zebrafish anterior segment (minus lens).  
 Unnormalized (nap) Danio rerio cDNA clone nap12d02 5', mRNA sequence D8.35B3  
 match  
 MLTVSSFTGAESANVYYTYRWCRCIYSSPDLSDMVYIDSYYFNKYLFTQFNSTLGKCVGF  
 SEYGIRNAEYWNNGTFVDEQERNEVERFCKHNSQIRDSAVISKAVKPKVKLSSVTRAGGRH  
 PAVLMCSAYDFYPPHIKISWLRD GQVVTSDVTSTEEMADGDWYQIHSLEYSPKSGEKI  
 SCAVEHASSTKPIIYDWDPSFSESEKNKL VIGASGLVLGIVLAAAGLIYX  
 >CK030151 AGENCOURT\_16620967 NIH\_ZGC\_7 Danio rerio cDNA clone IMAGE:7052626 5,  
 mRNA sequence D8.35B2 match  
 MILALFFVGESANVYYMYRVSRCIFSSNISAMVYFDRTYFNKNLFIQFNSNLGRFEGFN  
 EYGLKLAEFWNNGTFFVDQEKDVVEFFCKYNSQIYENSILDKAVKPKVKLSSVTRAGGRQS  
 AVL MCSAYDFYPPHINVYWL RNGEVMTSEVTSTMEMADGDWYQIHSLEYSPKPGERIS  
 CVIEHASSNKPMIYDWDPSLPVFERNKISIGVSALVLGIIITAAAGIYYKKKLQGG LSTS  
 SR  
 >CO798204 AGENCOURT\_30342545 NIH\_ZGC\_14 Danio rerio cDNA clone IMAGE:7400349  
 5, mRNA sequence D8.45B1 match  
 MSALFETVHAYTYAQIQCHVSDSLQKIEFISVTYNMIELVRYNSTEDTFFGYTAIGQK  
 FAEEYNKDEVLLAQHDFVLNQCRELGDVILPNAVWLAVKPEVIIRSVTEAKGNRKA VLVC  
 SAYDFYPPKGIKLTWMRDDKKTAE L TSSEVMADGHWHYQIHSYLEYFPQTGEKISCVVDH  
 ASSLKPMIYYWDPSP LPESERSKIILGAVGLLMGDF TAAAGVIYYKRKQTGFYRLPVCLLP  
 METMNDTEM  
 >DT880928 AGENCOURT\_58686230 NIH\_ZGC\_22 Danio rerio cDNA clone IMAGE:7924885  
 5, mRNA sequence D8.35A1 match  
 MQAVDGEDMHGIDNEEMWHADYNLKTGVLSPDFGDPITFFPRFYETSVIEMTGCKANIVS  
 LTKIFNSPPPEMDPPQTSIYPKDDVELGVQNTLVCHATGFYPPSIRILWTKNNVNVTEGI  
 SLSQYRPKVDGTFNIFSTFRFTPAEGDIYSCRVIHEALLGQPQAKIYDVVVAIPSVGSPV  
 FCGVALSLG LLGIATG TFFFIKHSTTMEIWK  
 >EH498789.1\_1 FDR107-P00042-DEPE-F\_J13 FDR107 Danio rerio cDNA clone FDR107-  
 P00042-BR\_J13 5', mRNA sequence D8.35A2 match  
 DSISRPRIRRFNKMELYITTLVLTIIILSAGAKVVHEDFAIRGCS DTEKEDTYGMDEEELW  
 HADFNQKKGVETLPDFGDPMTFPGFYEGSEGE MAVCKSNLALRIKGFKSPPPEMDAPQTS

IYPKDDVELGVQNTLVCHVTGFYPPSVSVSWTKNNINVSEEDITLSQYRPRIDGTFNIFST  
 LKFTPAEGDIYSCMVKHRAIKDQPQTKTWDVDAVLPSVGPVAVFCGIGLTL  
 >CO353326.1\_2 DR\_ATE\_FL13\_G10 adult testis full-length (TLL) Danio rerio cDNA,  
 mRNA sequence D8.37A4 match  
 MGLKLTSTGXQFTGCSDEKDDLNGFDGEVLYYTDFFIRKEGVVIAPDFADPLSFPGGYET  
 GVAQMEVCKQNLATDIKAYNSPQEQLDPPVTSIYSEDEVVLDEKNTLICVYTGFFPPPVN  
 VSWTKNNDIVTEDISFSQYRDNSDGTFFNMFSALKFTPAEGDIYSCTVKHRSIQGQPNTKT  
 WEVDVELPSVGPXVFCGSGV  
 >EG576857 AGENCOURT\_88173786 NIH\_ZGC\_35 Danio rerio cDNA clone IMAGE:8756121  
 5, mRNA sequence D8.37A2 match  
 MELVIVLTFIAFLSSNAEFVREEFEIYVCSDETESEAMVGADGEELWHADFKQKTGIITL  
 PDFADRIGFPGFYEISVDSIAGCKRNLANNIRGFKSPPPAMDAPHSSVYPNDDVELGVQN  
 SLICHATGFYPPSITISWKKNNNNVTEINLSQYRPRADGSFNIFSTLKFPTAEGDIYSC  
 TVNHEALHGQAQTKTWDVVALPSAFPVAVVCGVGLVFGLLGIAAGTFLLVKGNCN  
 >EH450259 FDR103-P00052-DEPE-F\_F04 FDR103 Danio rerio cDNA clone FDR103-  
 P00052-BR\_F04 5, mRNA sequence D8.46A match  
 MEALLRITLICVVCQAKDYHKYGLIGACGDADQEDFIVQFDDEQLAHVDFKEQKDVITLP  
 EFAGQAVLPPYVDKRAEFNCKAYLAVLREYVASSPEVLEPPWSSIYPKSDPQLNLKNT  
 LICHVTGFFPPPVRVLWTKNNVNTDGSTISRYYPNKDGTMMNVFSRLSFIPEEGDIYSCS  
 VEKALQQPQTRTWDVEVKQPSIGPSVFCGVGLALGLLFATGVFFFTAKGNNCN  
 >EB979084.1\_2 15505312 ZF40 Danio rerio cDNA clone 4224518, mRNA sequence  
 D8.37A3 match  
 SFPGFYEAGVAQMEVCKQNLATDIRAYNSPQEQLDPPVTSIYSKDEVVLDDKNTLICHVT  
 GFFPPPNNVSWTKNNDIVLEEISFSQYRENSDGTFFNMFSALKFTPAEGDIYSCTVKHRSI  
 QGQTNTKTWEVDV  
 >CF996478 AGENCOURT\_16384897 NIH\_ZGC\_7 Danio rerio cDNA clone IMAGE:7037730 5,  
 mRNA sequence D4A match  
 MDLTVRSEFPGSAKMELLYLLLAFTVVLSTHARVKHNLFMFNGCSDEKEALYGESEEE  
 MWHSDFKLKHGVATLPEFADPLSFPGAYEESVAELEVCKQNLATSIAKAYNSPPEEMEPPE  
 TSIYPRNEVLLGVDNVLICHVTGFFPPPVDVSWSRNNVKVTEGVDVVSQYRPRSDQTFHMF  
 SSLKIRPAAGDIYGCTVNHAALQEQPQTKLWVVPQGDVLSPLCLTPVLLSGLGFTVXLLGL  
 ATGIYFFVXGSTADVSDTAVNKRKLMQFYHXET  
 >CN023898 AGENCOURT\_20187689 NIH\_ZGC\_14 Danio rerio cDNA clone IMAGE:7229870  
 5', mRNA sequence D8.37B1 match  
 MSLRLRFYGNLILTSLVLI GAETANVYRYTWTWICISSSKNLSDMVFIESLYFNKYLFTQ  
 FNSNIGKYVGFSEYGIRNAEFRNNDTNLLKIKAAVNKVCKINAINHDKFIRNKAVKPKV  
 KLTLVKPAGGRHPAVLMCSAYEFYPPHIRVYWLNRNGEVITSDVTSTMEMADGDWYYQIHS  
 ELEYSKSGERISCGIEHASSNKPIITEWGRNMLTVILALFCGTFDILLYPTDSSRPAS  
 ERNKIALGHLGVVLGSSSQLICFITTRKLAQVPL

## Stickleback (*Gasterosteus aculeatus*) MHC class II sequences

### Stickleback Ensembl sequences:

>G129B scf129\_contig12675:25778-25611  
 EPYVRLHSETPPGGGPLSMLVCSVYDFYPKKIIVRWTRDGRPETTGVSTDELAGGRSGE  
 KMSCVVEHISLSKPLVTDW  
 >G129A Scf.129\_contig12675:26484-26221  
 SHMIYRKHGVELGEKNCHVTGFFPAPVTFSWTKSQENVTEGTCKNVPFLNKDRFTFNQFST  
 LEFTPKLGDYSSRVEHLALDHPLVKFY  
 >G131A1 ENSGACG00000000330\_ENSGACP00000000421\_scf\_131:52153-54217  
 MKTKTMMKMMVVLVLSGVFCVSADGPHKDIAIVGCSDSDEEMVGLDGEVWYADFKHGK  
 GVRPQPSFVDPIDYREGTYETAVGNQOICRNLLKIDLKAFKDFPLEKDPSSHMIYPKDG  
 VELGEKNSLICHVTGFYAPVTFSWTKNQDNVTEGSSRNVPYLNNNDGTFNQFSTLEFTPK

LGDIYSCMVEHLALDHPLVKFYDVQVSQPSVGPVAVFCVGLTVGLLGVAAGTFFFLIKGNE  
 CS  
 >G131B1 ENSGACG00000000336\_ENSGACP00000000425\_scf\_131:56853-59742  
 MAPSFISVSLFLFIGLHAADGFMEFVATECVFNSTELKDIEYIQSYYYNKLEYTRFSSSVG  
 KFGVFTEKGVKNAANNNPSYLSRAKAQKEVYCLNHVPVYYNNMLTKSAEPYVRLHSET  
 PPGGGPLSMLVCSVYDFYPKKIIVRWTRDGRPETTGVTSTDELADGDWYYQTHSHLEYTP  
 SRSGEKISCVVEHISLSKPLVTDWTDPSMPESERNKVAIGASGLILGLTSLAGFIYYKR  
 KARGRILVPSH  
 >G131A2\_DAA ENSGACG00000000344\_ENSGACP00000000434\_scf\_131:78913-81169  
 MKTKTMMKMMVVLVLSGVFCVSADGPHKDIRVLGCSDSGDNMFGLDGEVWYADFKHGK  
 GVRPLPSFVDPIDYPPGGAYEQAVTDLQICRSNLKTHVKGLKDVPLEKDPSSSHMIYPKDG  
 VELGEKNSLICHVTGFYPAPVTFSWTKNQENVTEESSRNVPYLNNDGTFTNQFSTLKFSTPK  
 LGDIYSCMVEHLALDHPLVKFYDVQVSQPSVGPVAVFCVGLTVGLLGVAAGTFFFLIKGNE  
 CS  
 >G131B2\_DAB ENSGACG00000000346\_ENSGACP00000000437\_scf\_131:96885-99355  
 MAPSFISVSLFLFIGLHAADGFLEFMTDECVFNSTELKDIEYITSYYNKLELTRFXINVL  
 VPLLYYQQNLLQFVRSFYTQWEP CRTLLLVLILVPVSSQNKPSCHILSPAEPYVRLHSE  
 TTPGGGPLSMLVCSVYDFYPKKIIVRWTRDGRPETTGVTSTDELADGDWYYQTHSHLEYTP  
 PSRSGEKISCVVEHISLSKPLVTDWNPSPMPESERNKVAIGASGLILGLTSLAGFIYYKR  
 KARGRILVPSH  
 >G131A3\_DBA ENSGACG00000000348\_ENSGACP00000000439\_scf\_131:118613-120538  
 MKTKTMMKMMVVLVLSGVFCVSADGPHKDIAIDGCSDSGDKMYGLDGEVWYADFKHGK  
 GVKPQPSFVDPIDYPAGAYELAVANQOTCRNDLKTDL EAYKDVPLEKDPSSSHMIYPKDG  
 VELGEKNSLICHVTGFYPAPVTFSWTKNQENVTEGSSRNVPYPNNDGTFTNQFSTLEFTPK  
 LGDIYSCMVEHLALDHPLVKCVFLSPDVQVSQPSVGPVAVFCVGLTVGLLGVAAGTFFLI  
 KGNECS  
 >G131B3\_DBB ENSGACG00000000350\_ENSGACP00000000450\_scf\_131:121399-126270  
 MAPSFISVSLFLFIGLHAADGFMEFRTDECVFNSTELKDIEFIRSSYYNKLEDTRFSSSVG  
 KFGVFTEQGMKNAANWVKDASYSAMRAQKEVYCLNNVQIKYDNALTKSAEPYVRLHSET  
 PPGGGPLSMLVCSVYDFYPKKIIVRWTRDGRPETTGVTSTDELADGDWYYQTHSHLEYTP  
 SRSGEKISCVVEHISLSKPLVTDWNPSPMPESERNKVAIGASGLILGLTSLAGFIYYKR  
 ARGRIILVPSH  
 >GIIIB ENSGACG00000017967\_ENSGACP00000023736\_groupIII:16679542-16682223  
 MAPSFISVSLFLFIGLHAADGFLEFMTDECVFNSTELKDIEYIRSYYNKLELTRFSSSVG  
 KYVGFTEYGVRNAANWVKDASELIAMRAQKEVYCLNSIQIKYNNVLTLSAEPYVRLHSET  
 PPGGGPLSMLVCSVYDFYPKKIIVRWTRDGRPETTGVTSTDELADGDWYYQTHSHLEYTP  
 SRSGEKISCVVEHISLSKPLVTDWNPSPMPESERNKVAIGASGLILGLTSLAGFIYYKR  
 ARGRIILVPSH  
 >GVII B ENSGACG00000019051\_ENSGACP00000025189\_groupVII:2444693-2447881  
 MAPSFHVSLLFLIFLHAAGGFMEFVKDQCVFNSTDLKGI EFIRSTYFNKLQYTKFSSSVG  
 KFGVFTEQGMKNAANNNMYMASIRAAKETICQPNIQRMVDNILTSAQPYPVRLHSET  
 PLGGRTSSMLVCSVYDFYPQNIIVRWTRDGRPEATGVSSTDELADGDWYYQTHSYLEYTP  
 SRSGEKIACVVEHISLSKPLVTDWDPSPMPESERNKVAIGGSGILGLTSLAGFIYYKR  
 GRGRILVPSY  
 >GVIIA ENSGACG00000019052\_ENSGACP00000025193\_groupVII:2449972-2451242  
 MKTKM MMMI VVLVLSGVSAYVPHEAIRISGCSDSGDEEMFGLDGEELWYADFCLKGKVS  
 LLPSFLDPITYPGGYEVAVAEQQFCRNLRIDLEAYKFP LERDPSSSHMIFPKDAVELGE  
 KNSLICHVTGFYPAPVAFSWTKNQENATEGTSRNI PFPNNDGTFTNQFSTLEFTPELGDY  
 SCMVEHLALDHPLVRFYDVQMSQPSIGPAVFCVGLTVGLLGVAAGTFFLVKRNECS  
 >GXVII B ENSGACG0000003680\_ENSGACP0000004837\_groupXVII:1117113-1119770  
 MSSSTFLLLLLSSCSAADGNHGFYMFYADFWCNMQTARPPQVEYLV DWYFNKEFTMQYNST  
 VGKWTGFTAAGLVSAAVFNGHFDVLRKEERRLICVDNVGHALNATEDNMAAPSVRLAE  
 ASGSGHNTTLVCSAYDFYPRRIRLAWLRDGEVTSAGT FSEVTTNGNWTYAVHSLSFTP  
 GGRDRVSCKVEHAGLQEPALRTWAAHGARDWETGFLVGGVCALLLGAACLSSGLIVHRRK  
 YSNIS  
 >GXVIIA ENSGACG0000003731\_ENSGACP0000004896\_groupXVII:1163942-1165035  
 MAVTLM LALAAALCTSAAGSSHDFHYTYGYESGEVRVDVLLDGDVVAYADFGREEVVFL

IPRLPPFLRDLKLLGYEFAKSSFTHCRSVLAKAKRASPNVTIPQDAPVLSVYSRHEGRGG  
 AANTLFLCLADGFYPPSVNFTWTNGARVTGGVWDLPGHNRDGTFRHISTLSTTPREGDV  
 YSCSVEHRAARRPLASSWAEPKEGSPSRVSPAAGFFGASLVVCLIGVASGAYFFTKQPNFG  
 >GXXB Gr.XX: 1081373-10814066  
 EPSVRLRSVHAADSRHPRMLLCTGYGFYPKQIRVMWLRNGNNVTS DVTSTEELSNGNWLY  
 QIHSYLEFTPRSGGEISCVVEHASLTQPKVYDW

### Stickleback translated Genbank cDNA report sequences:

>DW594610 CGX114-A05.y1d-s SHGC-CGX2 Gasterosteus aculeatus cDNA clone CGX114-A05 5, mRNA sequence GXVIIIB match  
 MSSSTFLLLLLCLSSCSAADGHGYFMYADFWCNMQTARPQQVEYLVVDWYFNKEFTMQYNST  
 VGKWTGFTAAGLVSAAVFNGNHFDVLRKEERRLICVDNVGHALNATEDNMAAPSVRLAE  
 ASGSGHNTTLVCSAYDFYPGRIRLAWLRDQEVTS GATFSEVTTNGNWTYAVHSSLSFTP  
 GGRDRVSCKVEHAGLQKPALRTWAAHGARDWETGFLVGGVCALLLGAACLSSGLIVHRRK  
 YSNIS  
 >DV011001 CNB266-F02.y1d-s SHGC-CNB Gasterosteus aculeatus cDNA clone CNB266-F02 5, mRNA sequence G131B1, G131B3 and GIIIB match  
 MAPSFISVSLFLIGLHAADGFMEFWTDECVFNSTELKDIEFIRSYYFNKLEFTRFSSSVG  
 KYVGFTEYGVRNAEYWNKDASQLSAMRAQKEVYCLNNVQIDYNNILTKSAEPYVRLHSET  
 PPGGGPLSMLVCSVYDFYPKKIIIVRWTRDGRPETTGVSTDELDADGDWYQTHSHLEYTP  
 SRSGEKISCVVEHISLSKPLVTDWNPSPMESERNKVAIGASGLILGLTSLAGFIYYKRRK  
 ARGRIIVPSH  
 >DW672198.1\_3 CNB369-F02.y1d-s SHGC-CNB2 Gasterosteus aculeatus cDNA clone CNB369-F02 5', mRNA sequence G131A1 and G131A2 match  
 MKTKTMMKMMVVLVLSGVFCVSADGPHRDIAINGCSDSDGELMYGLDGEEIWIYADFKHGK  
 GVKAQPSFVDPIEFQGAQEAVANQQTCSRNLKNDLKAFKDVPLEKDPSSSHMIYPKDGV  
 ELGEKNSLICHVTGFYPAPVTFSWTKNQENVTEGSSRNVPYLNNDGTFNQFSTLEFTP  
 GDIYSCMVEHLALDHPLVKFYDVQVSQPSVGPVFCVGLTVGLLVAAGTFFLI XGNEC  
 S

### Medaka (*Oryzias latipes*) MHC class II sequences

#### Medaka Ensembl sequences:

>M3A ENSORLG0000000025\_ENSORLP0000000027\_Chr.3:558225-564744  
 LLSDLKVMKVKLLFLCEILCGILSGTAEVLHEDFGILGCSYDQEYMYALDGEEKWYAD  
 YKKETGVGPQLPLGGHFINPDGYQFAKVYEQVCRRLKALKKTTKGLQLEQDPPSNVMVY  
 SRDEVELGQQNTLICHVSGFYAPVNVSWTRNGEKVPGSINVPLPSSDGTLTQISRLQFV  
 PQLGDIYSCSVEHPALPEVQTKIWFDEKSQPSVGPALFCGLGLVGLLVGVAATGTFFLIKG  
 NECS  
 >M3B ENSORLG0000000021\_ENSORLP0000000030\_Chr.3:554841-556227  
 MDSSSLRVFLILITLYPADGFIHYILNRCLFNSSDLKDIENIYSSYYNKEEFLRFSSSSG  
 KFGYTEIGVKTAELANNDPEKMSRRRAEKETFCKPNIDNDYSTILTKSVQPRVRVQSLE  
 PSGGNHPAMLICSVYDFYPKKIKVSWLQDQEEVSSDVTSTAEMEDGDWYQIHSYLEYTP  
 RSGGKISCRVEHISLKDPLITDWDPSMPESEKNKIAIGASGLILGLVLSLAGFVYYKRRK  
 RGRILVPSH  
 >M5A ENSORLG00000012794\_ENSORLP00000016018\_Chr.5:25231039-25236341  
 MSLTSLLLITGAVCASSTTPRHMFFHYIGCYETDEVRVDLVVDDDTIGYADFTKQEMVWC  
 LPYVPPSGKDLEKEAFKFAKNSIANCHSVLAKAKKADHGTPLRQEPDLSIYTRYKAEEG  
 VLDTLFCSANHFYPTINFTWTNGAEVTEGLLNLRFSHNKDGTFRGISTLSFTFPQRGDV  
 YSCWVSHEALERPRIITWESRRRRSPARMFFCASLILCLAGIGTGLYFFIKKPNYCCGCQ  
 >M5B1 ENSORLG00000012822\_ENSORLP00000016051\_Chr.5:25371618-25375673

ILSSLIYFYLLFLTSYYSKQDHGYFMFSDFFCYIPSRNPKEVQYLIDWYFNMELTMQYNS  
 SVGGWTGFTPAGLITAAKFNADKYDVVQRILERELVCQRSVEMVYNGTEEAKVEPNVSLQ  
 TVEDNDSTLECSALDFYPKHIRLWTWFSNGQEVTEGVTFSDVLPNGDWTYQAHTYLTLTPG  
 KQDHISCMVQHTSLKEPKIYNWEPSPMNQTDYIIIGVCALLLGAVFLCVGLIHYKQK  
 >M5B2 modified from ENSORLG00000012826\_ENSORLP00000016062\_Chr5:25378453-  
 25379616  
 YSKDQHGXYFMFSDFLCYLPSRNPKEVQYLIDWYFNMELTMQYNSVGGWTGFTPAGLITA  
 AKFNADKHDVVQRILERELVCQRSVEIIYETTETAKVEPNVSLQTVEDNDSTLECSALDF  
 YPKHIRLWTWFSNGQEVTEGVTFSDVLPNGDWTYQAHTYLTLTPGKQDHISCMVQHTSLKE  
 PKIYNWVCALLLGAVFLCGGLIHYK  
 >M16B ENSORLG00000009164\_ENSORLP00000011497\_16:14786594-14792142  
 TGKSQNCISLGLPLFLFLFSSTNAFYGHGTLKQCFTSSHDLVYLEQVYFNKRLMVQYNSTL  
 GKYEYTKKAKDLADGFSKSKPFLEQAVKNREKCRTHMDLVFELQSHPVPEPSVRVTPVVR  
 QGSSHQAMLACSAYNFYPKQIRLTLWRNGEKVINYVTSTEELPDGNWLYQIHSYLEYTPS  
 PREEITCMVEHASPKPKLYNWEVLSPPMFGAVRNKIAVGTALLFGSFVAVGLFFYKRT  
 T  
 >M16A ENSORLG00000009164\_ENSORLP00000011499\_16:14790903-14792142  
 SRKQEGFKCSLIHFKTSFFCFVFSVEHEISYFIGCFAEGSTEVLLLEFDSEEIYVDFEKE  
 AVVFTGSPFFKANLSERIQGLTTYKNGKKNRIWCQLADQYFTAETEERDKDPPGEVLIYT  
 SAEVQPGVENTIICFVNGFYPPSIKVSWTKNGNPVSEGVSHSRYPNKDQTFHQFSTLSF  
 TPSWTDVYSCTVEHPALES PKTVLWEPEFHHPNLVDVFLAASLGLLGFVAVGTCLIII  
 ALKRS  
 >M615B ENSORLG00000019376\_ENSORLP00000024128\_scf.615:38464-43568  
 TDMDFSSICLLFLTLYSADGFLEYDMHRCLFNSSDMKDIEYIYSKHYNKEEVIRFSSSLG  
 KYVGYTKFGVMAAGYWNKDLEGLRERRADKERLCKTNIIDLNYLNILTKSVKPSVMIESVT  
 SSGGHPAMLVCSVYDFYPKYIKVSWLRDQEEVSSDVTSTTELEDGDWYYQIHSLEYTP  
 RSGEKISCRVEHASLKDPLITDWDPSMPESEKNKLAIGASGLILGLVLSLAGFIYYKRKA  
 LGRSSLNRF  
 >M615A ENSORLG00000019409\_ENSORLP00000024163\_scf.615:87448-89094  
 FLLPLSLIKVMKIKLLFLFCGILSGTAEVFHEDFQITGCSYDEEFMVNLDGEEIVYTD  
 KKGTEVDAQPSFVGHITYAGGYGATVLELQGCRNDLEVI RFTKDLPLKQDPPSNV VVYS  
 RNKVELGQONTLICHVSGFY PAVNVSWTRNGEKVSGSINVPRPSSDGTFSQISRLQFVP  
 QLGDYSCSVEHPALPEVQTM IWDVEKSQPGIGPAVFCGLGLVGLLVATGTFFLIKGN  
 ECS  
 >M873B ENSORLG00000018856\_ENSORLP00000023542\_scf.873:60767-63324  
 MDSSSLCCLFLTMCSADAFLRYDVDRCVFNSTDLKDIEYIYSMYNKKKEFTRFSSSLGKY  
 VGYTEYGVKTAERANKDTSELSARKAQKETYCKHNIDNWKYKMLSKSVQPRVRVQSLAPS  
 GGHPAMLVCSVYDFYPKTIRVSWLRGKEEVSSDVTSTAEMEDGDWYYQIHSLEYTPRS  
 GEKISCKVEHASLKDPLVTEWDPSPMPESEKRNKVAIGASGLILGLVLSLAGFIYYKRKARG  
 RILVPSS  
 >M873A ENSORLG00000018887\_ENSORLP00000023574\_scf.873:65205-67367  
 MKMKLLLFVCGILSGTAAVFHEDLAITGCSDSGDGEMDALDGEVWYADFVKQTGVEPQP  
 PFVDHVSYPGGYEQAVANQQICRSNLKISR IAMKDLPLERDPPSNV VVYSRDEVELGEQN  
 TLICHVSGFY PAVNVSWTKNGERVSGSINIPFPSSDGTFTQISRLPFVLPQLGDYSCSV  
 EHPALTEVQTKIWDVEKTQPGVGPVAVFCGVLAVGLLVAAGTFFLIKGNES

### Medaka translated Genbank cDNA report sequences:

>FS518487.1\_2 FS518487 OLTE *Oryzias latipes* cDNA clone olte28i23 5', mRNA sequence M873B match

SLTANTDMDSSSLCCLFLTMCSADAFLRYDVDRCVFNSTDLKDIEYIYSMYNKKKEFTRF  
 SSSLGKYVGYTEYGVKTAERANKDTSELSARKAQKETYCKHNIDNWKYKMLSKSVQPRVR  
 VQSLAPSGGHPAMLVCSVYDFYPKTIRVSWLRGKEEVSSDVTSTAEMEDGDWYYQIHS  
 LEYTPRSGEKISCKVEHASLKDPLVTEWGPVHAR

>BJ883759.1 BJ883759 MF01ASD cDNA *Oryzias latipes* cDNA clone MF01ASD033f06 5', mRNA sequence M873A match



MKMKLLLVFCGILSGTAAVFHEDLAITGCSDSDGEDMYALDGEVWYADFKKQTGVEPQPPFVDHVSYPGGYEQAVAN  
 QQICRSNLKISRIAMKDLPLERDPPSNVSVSRDEVELGEQNTLICHVSGFYAPVNVSWTKNGERVSGSINIPFPSS  
 DGTFTQISRLPFVFPQLGDIYSCSVEHPALTEVQTKIW

>BJ877464 MF01ASD cDNA *Oryzias latipes* cDNA clone MF01ASD014g19 5, mRNA  
 sequence M5A match

ADSLVQLLTVLGFKMSLTSLLLITGAVCASSTTPRHMFHFYGCYETDEVVRVDLVVDDDT  
 IGYADFTKQEMVWCLPYVPPSGKDLEKEAFKFAKNSIANCHSVLAKAKKADHGTPLRQEP  
 PDLISYTRYKAEEGVLDTLFCSANHFYPPTINFTWTKNGAEVTEGLLNLRFSHNKDGTFR  
 GISTLSFTPQRGDVYSCWVSHEALERPRIITWESR

>BJ891116 MF01ASD cDNA *Oryzias latipes* cDNA clone MF01ASD014g19 3, mRNA M5A  
 match

DDDTIGYADFTKQEMVWCLPYVPPSGKDLEKEAFKFAKNSIANCHSVLAKAKKADHGTP  
 RQEPDLISYTRYKAEEGVLDTLFCSANHFYPPTINFTWTKNGAEVTEGLLNLRFSHNK  
 GTFRGISTLSFTPQRGDVYSCWVSHEALERPRIITWESRRRRSPARMFFCASLIILCLAGI  
 GTGLYFFIKKPNYCCGCQ

## Fugu (*Takifugu rubripes*) MHC class II sequences

### Fugu Ensembl sequences:

>F402A ENSTRUG00000004342\_ENSTRUP00000010322\_scaffold\_402:55188-57563  
 MMKMLLLILCCVVGASADSQHEDIRILGCSDLDGEFMYGLDSEEVWYADFSKGEVDINP  
 PFIDPITYEAGAYSSAVADLQCTKTSLDITRKSCLKMPPERVAPTSPIYTKKEEVQLSQQ  
 NTLICFVTGFYPAPVNVSWTRNGEHVTQGT SINVPYPNKEGFTTQISRLAFVPPQQGDIYS  
 CRVQHPALSGQDTRMWTVEVQQPGVGPVFCGLGLTLGLLGVAAGTFFLIKGNECR

>F713A fuguDAA\_scf 713:89-334

QHKDINIVGCSDLDEGFMYGLDSEELWYADFSKGEVYGTTPPFIDPFYEEGVYSQAVTE  
 LQCTKNLDSERKAYKDMPPET

>F7533B ENSTRUG00000017449\_ENSTRUP00000044727\_scaffold\_7533:2656-4187  
 SRMSSSLRVFLLFISLYTAAGGFQSYVVDSCDFNSTDLKDIEYTRSLYINRVMYARFSS  
 RVGKFEGYTKYGLFQADYWNQSSILEGLRETKEASICQPNIKIDYSNLSKSVPEPTVRVH  
 SVVPPAGGHPAMLVCSVYDFYPRYIKVSWQRDGEVVSQDVTSTDELADGDWYQLHSHLE  
 YTPRSGEKISCVVEHASLKTPLVKDWGNHLSVCS

>F7533A ENSTRUG00000017444\_ENSTRUP00000044708\_scaffold\_7533:430-1814

MMKMLLLILCCVLGVSADSQHKDIGIVGCSDLDGEFMYGLDSEELWYADFSKGEVYGTTP  
 PFIDPFRTAAAVADLQCTKYNLDVDRKGNKDMPTETVAPTSPIYTKKEEVQLSQQNTLI  
 CFVTGFYPAPVNVSWTRNGEHVTQGT SINVPYPNKEGFTTQISRLAFVPPQQGDIYSCR  
 VQHPALSGLDTRMWTVEVQQPGVGPVFCGLGLTLGLLGVAAGTFFLIKGNECR

>F7721A ENSTRUG0000000833\_ENSTRUP00000002005\_scaffold\_7721:158-1461

MKMLLLILCCVLGVSADSQHKDIRITGCSDLDGEDMFGDLSEELWYADFSKGEVDGTPP  
 FIDPVRFEFGYSTAVTNLQICKSNMDVVRKGNKDMPPETVAPTSPIYTKKEEVQLSQQNT  
 LVCFVTGFYPAPVNVSWTRNGEHVTQGT SINVPYPNKEGFTTQISRLAFVPPQQGDIYSCR  
 VQHPALSGQDTRMWSRQADRQADRQAGR

>F7721B fuguDAB\_Scf 7721:2626-3027\_no enstrug name

MSSSSLRVFLFISLYTAGGFQSYRVDRCDFNSTDLKDIEYSRSHYINKLMYVRFRRSSVG  
 KFEGYTKDGLIQADYWNNISSYLEQMRDEKERYCEPNIKVWYSNLSKSVPEPTVRVH

>F8524B ENSTRUG00000002062\_ENSTRUP00000004737\_scaffold\_8524:1050-3165

MSSSSLRVFLFISLYTAGGFQSYRVDRCDFNSTDLKDIEYSRSHYINKLMYVRFRRSSVG  
 KFEGYTKDGLIQADYWNNISSYLEQMRDEKERYCEPNIKVWYSNLSKSVPEPTVRVH  
 PPAGGHPAMLVCSVYDFYPRYIKVSWQRDGEVVSQDVTSTDELADGDWYQLHSHLEYLP  
 ACLSALLSVCLSETHLSVPTCLPSPDPSMPESERNQIAIGASGLILGLLISLAGFIYFKRK  
 SRGRILVPPN

### Fugu translated Genbank cDNA report sequences:

>CA846190 haa10g02.y5 Fugu UT11 adult fin Takifugu rubripes cDNA clone  
 IMAGE:6343467 5 similar to TR:Q31462 Q31462 MHC CLASS II PROTEIN.mRNA F7533B  
 match  
 MSSSSLRVFLLFISLYTAGGFQYYVVSRCFSFNSTDLDKIEYSRSVYYNKLMYARFSSSVG  
 KFEQYTKYGLFQADYWNNQSSILEQVRDNKERYCQHNIKWNYSNILSKSVEPEVIVHSV  
 PPAGGHPAMLVCSVYDFYPRYIKVSWQRDGEVSDVSTDELADGDWDFYQLHSHLEYTP  
 RSGEKISCVVEHASLKTPLVKDWDPSMPESEARNQIAIGASGLLILGLILSLAGFIYFKRKS  
 RGRILVPNN

>CA846902 hab89d12.y1 Fugu hgmpC adult gill Takifugu rubripes cDNA clone  
 IMAGE:6355654 5 similar to TR:Q31465 Q31465 MHC CLASS II ALPHA. contains MSR1  
 repetitive element; mRNA sequence. F402A and F7533A match  
 RYEEGVYSQAVTELQTKTNLDSERKAYKDMPPETVAPTSPMIYTKEEVQLSQQNTLICF  
 VTGFYAPVNVSWTRNGEHVTQGT SINVPYPNKEGTFQTISR LAFVPPQQGDIYSCR VQHP  
 ALSGLDTRMWTVEVQQPGVGPVAVFCGLGLTLGLLGVAAAGTFFLIKGNECR

>AB453019 Takifugu rubripes mRNA for MHC class II alpha chain, complete cds  
 F7533A match  
 MMKMLLLILCCVVGASADSQHEDIRILGCSDLDGEFMYGLDSEEVWYADFSKGEVGINP  
 PFIDPITYEEGAYSSAVADLQTKTSLDITRKS LKDMPPERVAPTSPVIYTKEEVQLSQQ  
 NTLICFVTGFYAPVNVSWTRNGEHVTQGT SINVPHPNKEGTFQTISR LAFVPPQQGDIYS  
 CRVQHPALSGQDTRMWTVEVQQPGVGPVAVFCGLGLTLGLLGVAAAGTFFLIKGNECR

### Tetraodon (*Tetraodon nigroviridis*) MHC class II sequences

#### Tetraodon Ensembl sequences:

>T19A ENSTNIG00000005593\_ENSTNIP00000008293\_Un\_random:19583822-19591157  
 MKMLLLILCCILGVSADGQHEDIRIVGCSDFDGEYMHGLDGEELWYADFRREGVYAQPD  
 FIDPIKYEYGFYSTAVAVLQICKFNLGIFRKGKDMPPRELDPPTSPMVYTRNEVQLTEPNT  
 LVCLVTGFYAPVNVSWTRNGEEVTQGT SINVPYPNNEGTFQTISR LDFVPPQQGDIYSCR  
 VQHPALSEADTRMW

>T19B ENSTNIG00000005592\_ENSTNIP00000008294\_Un\_random:19597929-19598797  
 MASSALRVSLFLGLSAAGAFEHYGLRRCDFTS AEPKDM EYSLSVYYNKHLMARFSSSVG  
 KFGYDQYQADYWNNQSSFL EAMRSSKQRLCQHNIPLWYSHILSKSVLKDFVYSVA  
 PPAGGHPAMLVCSVYDFYPKKIKVSWRRDGEVSHDVTSTDELADGDWDFYQLHSHLEYTP  
 RSGEKISCVVEHASLKTPLVKDWDPSMPEAERNQIAIGASGLLILGLILSLAGFIYFQRKS  
 RGRILVPTN

>T48B ENSTNIT00000004743\_ENSTNIP00000004600\_Un\_random: 48,695,828-48,696,540  
 VLVYSVAPPAGGHAAMLVCSVYDFYPKKIKVSGRRDGEVSHDVTSTDELADGDWDFYQLH  
 SHLEYTPRSGEKISCVVEHASLKTPLVRDWDPSMPEAERNQYAIGASGLLILGLILSLAGF  
 IYFQRKSRGRILVPTN

>T55A ENSTNIG00000000926\_ENSTNIP00000001278\_Un\_random:55779303-55780575  
 MKMLLLILCCVLGVSADGQHEDIRIVGCSDFDGEYMYGLDGEELWYADFRREGVYAQPD  
 FIDPLKYAEDPYSLAVATLQMKFNLGIFRKGKDMPPRELVPPTSPMVYTRSEVQLTEPN  
 TLVCLVTGFYAPVNVSWTRNGEEVTQGT SINVPYPNNEGTFQTISR LDFVPPQQGDIYSC  
 RVQHPALSEADTRMWTVEVKQPGVGPVAVFCVGLTLGLLGVAAAGTFFLIKVNQCR

>T61A ENSTNIG00000003745\_ENSTNIP00000001966\_Un\_random:61621456-61622716  
 MKMLLLILCCVLGVSADGRHEDVHIRGCSDFDGEDMYGLDGEERWYADFKRGEVYALPD  
 FVDPLKFP EGTYSQAVADQQICKINLGISRKGKDMPPRELVPPTSPMVYPSSEVQLTEPN  
 TLVCLVTGFYAPVNVSWTRNGEVTQGT SINVPYPNNEGTFQTISR LDFVPPQQGDIYSCR

VQHPALSEADARMWTVEVKQPGVGPVAVFCGVGLTLGLLGVAAGTFFFLIKGNQCR  
 >T61B ENSTNIG0000000531\_ENSTNIP00000006345\_Un\_random:61617277-61620814  
 MASSALRVSLFLGLSAAGGFEHYEVDLDCDFTSAELKDIEYSRSLYLNKHLIYARFSSSVG  
 TFGVFTKYGLHQADYWNQSSYLDRLKKEEKQRYCHRNIQNWYSHILSKSSHVDVTSTDELA  
 DGDWIFYQLHSHLEYTPRSGEKISCVVEHASLKTPLVKDWDPSMPEAERNQIAIGASGLIL  
 GLILSLAGFIYFQRKSRGRILVPTN  
 >T70B ENSTNIG00000004611\_ENSTNIP00000007260\_Un\_random: 70,836,268-70,837,419  
 LKDPTRVRLVAPPAGGHAAMLVCSVYDFYPPKIKVSWRRDQGEVSHDVTSTDELAD  
 GDWIFYQLHSHLEYTPRSGEKISCVVEHASLKTPLVKDWDPSMPEAERNQIAIGASGLIIG  
 LILSLAGFIYFQRKSRGRILVPTN

### Tetraodon translated Genbank cDNA report sequences:

>CR731060.2 Tetraodon nigroviridis full-length cDNA T19A+T55A match  
 MKMLLLIILCVLGVSAADGQHQDIKISGCSDFDGEFMYGLDGEELWYADFRREGVYPLPD  
 FIDPFYDEGVYSLAVATLQVCKFNLGLFRKGYKDMPRELDPPTSPMVYTRNEVQLTEPN  
 TLVCLVTGFYPAPVNVSWTRNGEEVTQGT SINVPYPNNEGTFQTISRDLDFVPQQGDIYSC  
 RVQHPALSEADTRMWTVEVKQPGVGPVAVFCGVGLTLGLLGVAAGTFFFLIKGNRSR  
 >CR732064.2 Tetraodon nigroviridis full-length cDNA T19A+T55A match  
 MKMLLLIILCCVLGVSAADGQHQDIKISGCSDFDGEFMYGLDGEELWYADFRREGVYPLPD  
 FIDPFYDEGVYSLAVATLQVCKFNLGLFRKGYKDMPRELDPPTSPMVYTRNEVQLTEPN  
 TLVCLVTGFYPAPVNVSWTRNGEEVTQGT SINVPYPNNEGTFQTISRDLDFVPQQGDIYSC  
 RVQHPALSEADTRMWTVEVKQPGVGPVAVFCGVGLTLGLLGVAAGTFFFLIKGNQSR  
 >CR682088.2 Tetraodon nigroviridis full-length cDNA T61A match  
 MKMLLLIILCCVLGVSAADGQHEDVHIKCSDFGGEDMYGLDGEERWYADFKRGDGVYALPD  
 FVDPLKFVEGTYSAVADQVCKINLGISRKGNKDMPRELVPPTSPMVYPSSEVQLTEPN  
 TLVCLVTGFYPAPVNVSWTRNGEVTQGT SINVPYPNNEGTFQTISRDLDFVPQQGDIYSCR  
 VQHPALSEADTRMWTVEVKQPGVGPVAVFCGVGLTLGLLGVAAGTFFFLIKGNQCR  
 >CR727057.1 Tetraodon nigroviridis full-length cDNA T19B match  
 MASSALRVSLFLGLSAAGAFKHIEVDLDCDFTSAELKDIEFSRSVYLNKHLIYARFSSSLG  
 KFGVFTKWLRLVADYWNQSSYLDQLRGEKQRFCLHNIQVWYSNLSKSVLKDVLVYSVA  
 PPAGGHAAMLVCSVYDFYPPKIKVSWRRDQGEVSHDVTSTDELADGDWIFYQLHSHLEYTP  
 RSGEKISCVVEHASLKTPLVKDWDPSMPEAERNQIAIGASGLILGLILSLAGFIYFQRKF  
 RGRILVPTN  
 >CR697461.3 Tetraodon nigroviridis full-length cDNA T19B match  
 MASSALRVSLFLGLSAAGAFEHYWVSRCDFTSAELKDIEFSRSFYLNKHLNVRFSSSLG  
 KFGYDKFGQHQADYWNQTSFLEAMRDSKQRYCQHNIQNWYSNILT KSVLKDVLVYSVA  
 PPAGGHAAMLVCSVYDFYPPKIKVSWRRDQGEVSHDVTSTDELADGDWIFYQLHSHLEYTP  
 RSGEKISCVVEHASLKTPLVKDWEPSMPEAERNQIAIGASGLILGLILSLAGFIYFQRKS  
 RGRILVPTN  
 >CR726114.2 Tetraodon nigroviridis full-length cDNA T19B match  
 MASSALRVSLPFLGLSAAGAFKEYTVDRCDFTSAELKDIEFTRSEYYNQHLVRFSSSLG  
 KFGVFDKYGQYQADYNNQSSILEAMRGEKQRYCLNHIPVWYSNLSKSVLKDVLVHSVA  
 PPAGGHAAMLVCSVYDFYPPKIKVSWRRDQGEVSHDVTSTDELADGDWIFYQLHSHLEYTP  
 RSGEKISCVVEHASLKTPLVKDWDPSMPEAERNQYIAIGASGLILGLNLFLAGFIYFQRKS  
 RGRILVPTN

## Tilapia (*Oreochromis niloticus*) MHC class II sequences

### Tilapia Ensembl sequences:

>O1A ENSONIG00000006325 GL831301.1: 1,431,629-1,433,771  
 MKMKELLLFLSCVLCVSANFLHEDIHIVGCSESNGEVMFGLDGEELWYADFENKIGVSPQ

PSFVDPISFGDGAYETAVINLYICKTNMQVSQEGMKDYPLNHDAPSGVMIYTRNEVELRV  
 TNTLICHVTGFYPPGVKVSWTKNGQKLTGEGFSINVPYPNKDGTGFKQIARLQFIPQQGDIY  
 SCTVEHLALKEPLTKIYNVEAPEKPKPSVGPVFCGLGVIIGLLSAAGGTFILKANKCT  
 >O1B ENSONIG00000006327 GL831301.1: 1,435,653-1,439,547  
 MASSFLCFTLLFISIHADGFLEYIVDRCDFNSTELENMEYIYSHYINKMEYIRFSSNVG  
 QYVGFDFGVRLAEVWNNDTADLNLMLRLKIATYCHHNIDINDRAILTKSVQPSVRIKSMT  
 PPSGQHPAMLVCSVYDFFPISKIKVSWLRDQAVSSDITSTEEMPNGDWYYQTHSQLEYTP  
 RSGEKISCVVEHASLKEPLITDWDPPSSDKSTSESTLIAIGASILTGLLILLLAGFIFYR  
 WRARDPTLFSNE  
 >O9A ENSONIG00000019112 GL831209.1: 2,227,167-2,229,515  
 MDSSLMLLALASCVFTHAAVHEETLFYSCSESGDGQVQLHYDGDQITYADFKKHAVWT  
 APLLKDLTAILSWFFPLALDSRTRCFYLDRAVRLDNSSMTLKAPAVVIYPMDEAETGK  
 NNTIYCHIRHFYPPSNVNTWTRNGIRVTEGVNLSNPYPQTDGTFNQLASFQFPQSDDDVV  
 ECSVQHQALSRLITTWTLPMKPARSAAAWVCLSLGLLICALGVIIIFIISAKESLRHKLS  
 >O9B ENSONIG00000019113 GL831209.1: 2,230,917-2,233,060  
 AVCSLLLLLLLLLRSGVAEDEKDYFHILKTCQFIEKSSQSDVHYQVQYWYNGLLQAFYNSS  
 TEKVVGFTHYGKVFADVNKSPDYLVKVRNLDLNYFCKVLGAVLYKDIQVKAVPPVSRKLS  
 VTSNSSEDSEVLVCSAYNFYPPQIRLSWLRDGVVIPPDPGMMITEMPGGEWRQIHSYLQ  
 HKLNSGQNTICMIEHRGLQEPQLLKLKERSEVQSNSVTLAWEGAILATGLFVLLASVVFHC  
 RKTICIIFVGSF  
 >O18B1 ENSONIG00000019932 Scaffold GL831518.1: 4,104-13,309  
 MASSFLCLSLFLISLSTAGGFMHYSVDRCNFSNSSEPQDIEYIRSYFRKVEFTRFDSSVG  
 KYVGYTEYGVKNAEENKDKGNLAAMNAQKEVYCQKKIDNRYNAILPKSAKPYVKLHSTM  
 PLSHHHPAMLVCSVYDFFPSEIKVSWQRDQEVTSDDVTSTEEMADGDWYYQTHSHLEYTP  
 RSGEKISCVVEHASLEKPLITDWDPSMPESEKLAIGASGLILGVILSLAGFIYYKRKA  
 RGRILVPTN  
 >O18B2 ENSONIG00000019937 GL831518.1: 312,391-316,936  
 MASSFLCLSLFLISLSTADGFMEYHVDRCNFSNSTDLKDIEYIYSCYINKIEYARFSSSVG  
 KFGVFTKHGVYNADKWNNDPAELNNRRAQKERYCHNNIGVDYQVALTKSAKPYVKLHSM  
 PASSHHHPAMLVCSVYDFFPSEIKVSWQRDQEVSSDVTSTEEMADGDWYYQTHSHLEYTP  
 RSGEKISCCKVEHASLEKPLITDWDSSMPESEKLAIGASGLILGLILSLAGFIYYRKA  
 RGRILVPTN  
 >O18B3 ENSONIG00000019944 GL831518.1: 404,131-408,913  
 MASSFICLLFLISLSTADGFKMYVSRCDFNSTELKDIKIRSYYNKIEVTRFDSDVRKF  
 VGFTEGFGVKQAKHFNSQPGRALATLKAEKERYCQHNIGIWIYSNVLPKSDSEEADGDWYYQI  
 HSHLEYTPRSGEKISCCKVEHASLEKPLITDWDSSMPESEKLAIGASGLILGLILSLAG  
 FIYYRRKARGRILVPOH  
 >O18A1 ENSONIG00000019933 GL831518.1: 18,305-20,484  
 MKMKELLLFLSCVLSVSADVLHEDIGIVGCSDSGDGDMYGLDGEVRYADFKKQEDINSL  
 PPFADLITCPGQCYEQAVANQQVCKQNLQTLRKMMDYPLEHDAPSAMVIYTRDEVEFGEK  
 NTLICHVTGFYPPVNVSWTKNEQKVTERSSINVPYPNKDGTFTQISRLQFTPPQQGDIYS  
 CTVQHLALTQPATKIYDVQASASQSDPGFGPAAFCGVGLTVGLLGVAAAGTFFLIKNECS  
 >O18A2 ENSONIG00000019940 GL831518.1: 317,998-320,025  
 MKMKELFLFLSCVLCVSADALHSDIAINGCSDSGDGEFMYGLDGEKQYADFNKHTGVDAP  
 PDFIGSFNYQEGAYENAVANQQICRANLKVDSKGMKDFPLEHDAPSGVMIYTRDEVEFGE  
 ENTLICHVTGFYPPVNVSWTKNEQKVTOGSSINVPYPNKDGTFTQISRLEFTPQLGDIY  
 SCKVQHLALTQPLTKIYEVEASARSDDPGVPSVFCVGLTVGLFGVAAGTFFLIKNECS  
 >O18A3 ENSONIG00000019943 GL831518.1: 399,821-401,995  
 MKMKELLLFLSCVLCVSADPLHSDIAIGGCSESDGENMYGLDGEIAYADFNKQEFIYPQ  
 PPFIDPITVPGGYESSVAFQHSORENMKLFKGKMDYPPPEQDAPSAMVIYTRDEVEFGEK  
 NTLICHVTGFYPPVNVSWTKNEQKVTOGSSINVPYPNKDGTFTQISRLEFTPQQGDIYS  
 CAVQHLALTQPLTKIYEVEASAHSDPGVPSVFCVGLTVGLVGVAAAGTFFLVKNECS  
 >O22A1 ENSONIG00000012437 Scaffold GL831322.1: 920,733-935,169  
 MKMKVWVLLLVSSVPCVSADGLHETSSVSGCSDSGDGDLVLDDEVVWYADFYNQKQVD  
 SLPAFADHPHWKDGMYEQAVVNQQICRYNLKMARTAMKDFPKQRDAPSSVNIYTTLNVEI  
 GVQNTLICHVTGFYPPVNVSWTKNEQKVTOGSSINVPYPNKDGTFTQISRLEFTPQQGDIYS  
 VYACIVEHMALTOPIITKVYAVEDVEPIILGPILGPAIFCGVGVTVGVFGVAAGIFLFIIRGK

K

>O22B1 ENSONIG00000012441 Scaffold GL831322.1: 945,399-948,614  
MDSFYFCFSLFFIILCRADGYEYYTSSRCLFNSTELRDIEYIRSYYYNKTEYVRFSSSVG  
KFVGYTEYGVREADQWNKDQGGQGSWTRKGLAAMRAQKETYCKPKIDFWYQSVLTKAVKP  
SVRLHSIPPVYLNPAILVCSVYNFYFPEIKVSWLRNGQQVSPDITSTVEFANADWLYQTH  
SYMEYTPRSGEKISCMVEHASLKEPLVTDWVPSMSESKKLMIVGAFGLIILGLLFFLAGVI  
YTRMCSRGSSTHTK

>O22A2 GL831322.1:1.002.299-1.002.538  
LYEMNSVSGCSDTDGENVLILDDEVVWYADFNKQKGVDSLPAFADHPGFEGKYEEAVANQ  
QICRQNLKMARLAMKDFPKE

>O22A3 GL831322.1 GL831322.1:1.234.580-1.234.813  
LYEMNSVSGCSDTDGEDVLIILDDEVVWYADFNKQKGVDSLPAFADHPGFEGKYEEAVANQ  
QICRQNLKMARLAMKDFP

>O22A4 GL831322.1:1.279.567-1.279.812  
LHETNSISGCSDDTDGEDALILDDEVVWYADFNKHTGVDSLPAFADHPHWQEGMYEEAVAN  
QQICRQNLKMARLAMKDFPKE

>O22A5 GL831322.1: 1,359,006-1,361,338  
LSSVLCVSADGLHETNSISGCSDDTDGEDALILDDEVVWYADFNKHTGVDSLPAFADHPHW  
QEGMYEEAVANQQICRQNLKVARSAKDYKELDAPDSVEIYITIVNVEIGVQ

>O22A6 GL831322.1:1.368.491-1.368.730  
LYEMNSVSSCSDTDGEDVLIILDDEVVWYADFNKRKGVDSLPAFADHPSFEGKYEEAVANQ  
QVCRQNLKVARTAMKDFPKE

>O22B2 GL831322.1:1.369.583-1.369.858  
GYEYYTSSRCLFNSTELRDIEYIRSYYYNRIEYVRFSSSVGMFVGYTEYGVKEAEYFNND  
PGQLAAMRAQKETYCTPNIDLWYRSVLTKS

>O29B1 ENSONIG00000006116 GL831229.1: 905,654-908,009  
SLCEKIRLIATFIRDFVFMHTHNLILPHVLLIFSTADAYFGYGVVRCFLFTSKDDVVY  
LAQVYLNKMLLGGQYNSLQYVGYTEKTEKIADNLNKNKGFLEHEKKNKEKCRTNIPVLV  
DILSRPVPKPSVRLRLVESADSKHPGLFMC SAYNFYPKQIKLTWLRDGEATSNTVSTDEL  
PNGNWLYQIHSYIEISSKPEKISCVVEHASLTEPKVIDWVPITEAGKNKIAVGAAGLLL  
GLVFPPIIGVIFYKRKTTDEMIVTTN

>O29B2 GL831229.1:925.993-926.199  
LIRCLFTSKDDVVYLAQIYFNKVLVQYNSTLGKYVGYTEKLKEVADELNKNERFLEQEK  
KNEQECRTNIPLVFNVLSRP

>O29B3 GL831229.1:933.642-933.887  
EQFYFNKVLQYNSVGVVGYTKNGIEFADKLNKDFMKHEVWKS NLCKRNVQMFYD  
GL

>O29A1 GL831229: 909.268- 909.463  
DPPESILCLAEVEVELGVENSLICFVNHFYPPSINFS\*TKNGHPVSEVRSRYVFNKDQI  
FHQFSTLTFSLSEGDIYSCTAEH

>O29A2 GL831229.1:920028 - 920170  
DPPESMLYPADEVELGVENSLICFVNYFYPPSINVSWTNGHPVSEGVLSRYVFNKDQT  
FHQFSTLVFTPSEGDYISCTV

>O29A3 ENSONIG00000006121 GL831229.1: 938,918-940,053  
MKHAPLLILILNFCVFSQIPHEMTYVVGCFVQGLTEVQFEFDGEEFLYADFPKKEIYVT  
VPKFIFFDPSPHVLVGLSILKDALDNRDWCLIIITKIAAMEEKYPPEEKDPPEIVLFSDDKV  
ELGVENSLICLVNHFYPPSINVTWTKNGHPVSTGVLSRYVFNKDQTFHQLSTLTFPSE  
GDFYSCTVEHSALETPQTRIWEAEVNTSDQSLGPVIFCGVGLSLGLLGITVGVFFFVKGH  
QRQ

>O31B1 ENSONIG00000007425 GL831231.1: 498,924-502,495  
MASSFVCFTHLLISIHADGFLEYMVERCKFNSTELKMEYIYSHYYNKIEYIRFSSSVG  
KYVGVTEFGENLAKHWNNDTEELNSTRSKIVTYCLNNIDIHDRAILAKSVQPRVRIKSKT  
PLSGQHPAMLVCSVYDFPPTKIKVSWLRDGEVYSDVTSTEVMPNGDWYQTHSHLEYKP  
RSGEKISCVVEHVSLEPLITDWDPSDKSTSESTPLTAIGASILTTLGLILLVGYIFYR  
WKARGQTRTHTH

>O31B2 ENSONIG00000007445 GL831231.1: 1,171,738-1,174,377  
FLEYIVDRCEFSTELKMEYIYSHYYNKIEYIRFSSSVQYVGFTEYGVMLAEIILNNNT

ALLNSSRQMITTEYCYHNIDVHDQAIIAKSVRPRVRIKSKTPLSGQHPAMLVCSVYDFFPN  
 KIKVRWLRDEQEVTSDVTSTEVMPNGDWYYQTHSYLEYTPRSGEKISCVVEHVSLSEPLI  
 TDWESSDDKSTSESTPLTAIGASILTGLVLLLAGFIFYRWK  
 >O31B3 ENSONIG00000007449 GL831231.1: 1,232,619-1,236,792  
 MASSFLRFTFLFISIHADGFLEYIVDRCEFNSTELKEMEYIYSHYINKIEYIRFSSVVG  
 KYVGVTDGTVNLAKRWNNTALLNSTRSKIATYCLSNIGIHDRAI IAKSVRPSVRIKSKT  
 PLSGQHPAMLVCSVYNFFPRKIKVSWLRDQKVTSDVTSTQEMPNGDWYYQTHSHLEYTP  
 RSGENISCVVEHASLKEPLITDWAHSDPPSDKSTPESTTLIAIGASILTGLLILLLAGFF  
 LYRWKARARLVVKA  
 >O31A1 GL831231.1:463.509-463.778  
 VMIYTRNEVELRVKNTLICHVTGFYPAPVKVSWTKNGQITTTGGSSINTPYPNKDGTFTQI  
 ARLQFIPQQGDVYSCTVEHLALTKPLTKIY  
 >O31A2 GL831231.1:505.586-505-849  
 APSCVMIYTRNEVEFTVKNLICHVTGFYPAPVKVSWTKNGRITTTGGSSINNPYPNKNGT  
 FTQIARLKFILHCTVEHLALTDPLTKT  
 >O31A3 ENSONIG00000007446 GL831231.1: 1,175,562-1,178,887  
 MKMKELLLFLSCVLCVSADSLHTDIHIVGCSDFNGEVMFGLDREELWYADFEKQMDVYPO  
 PPFIDPISFGDGAYETAVSNLYTCRQLLQLSRQGMKDYPLRDAPSGVMIYTRDEVELTV  
 KNTLICHVTGFYPAPVKVSWTKNEQITTEGSSINTPYPNKDGTFTQIARLKFIPQQGDVY  
 SCTVEHLALTKPLTKIYNVETPETPETPETPKPSVGPVAVFCGLGVIIGLLSAAGGTFIL  
 KANKAADQSDLSPLSMVILSYWQ  
 >O31A4 ENSONIG00000007453 GL831231.1: 1,242,793-1,244,465  
 MKMKELLLFLSCVVCVSADALHTDIHIVGCSDFNGEVMFGLDREELWYADFEKQMGVSPQ  
 PSFIDPISFGAGAYKTAVSNLNTCRQNLQITREGIKDFPPLRDAPSGVMIYTRDEMELRV  
 NNTLICHVTGFYPAPVKVSWTKNGRITTEGSSINTPYPNKNGTFTQIARLKFIPQQGDVY  
 SCTVEHLALTKPLIKIYNVETPETPEKPKPSVGPVAVFCGLGVIIGLLSAAGGTFILKAN  
 KSI  
 >O33A ENSONIG00000009902 GL831433.1: 1,722-3,127  
 EKYRLNMFLLKIIILSTAACVEAEGRHTLCHIYGCFDSSDTQICAAFDGDEVYADFKKD  
 ELIWESKIPISFHLDPDAYKYAVFYRSMCKNDIYRWKPKDKSVIKKKEPPEFIIYPRDEVIT  
 GEDNTLICFINHFFPPSINIKWTKNDVEVTVEDPFIKTLSNPDGTAYVLSYLNFFVEKGD  
 IYCTVEHEALKEPQTRFEVETDEISKGPVAVFCGLGSLGLLGVFIGTYFFFKAGHSGP  
 AG  
 >O33B1 GL831433 5.113-5.340  
 STLVC SAYNFYPKQIRMMWNRNGQEVTTDVSYSVDVMPDGDWYYQTHSYLEYIPTSGEKIA  
 CMVEHLGLSEPMFVWV  
 >O33B2 GL831433.1:16.120-16.443  
 DWYYQTHSYLEYIPTSGEKIACMVEHLGLSEPMFVWVPSLPVAQRTQIAVGLCGLVIGFV  
 IASGFIYYNKKSAAYI  
 >O39A ENSONIG000000010744 GL831439.1: 301,122-309,267  
 MKMKELLLFLSCVLCVSAYGLHGDVHINGCSDFDAEDMYGLDGEVAYADFNHTEVYIL  
 PPFAEPMIYPGAYKQAVTELKVCRRHNLKALRAVMKDYPSNNHAPSAMVIYTRDEVEFGEE  
 NTLICHVTGFYPAPVNVSWTKNGQKVTESSTNVPYPNKD  
 >O42A ENSONIG00000018452 GL831842.1: 89,157-98,104  
 MKMKELLLFLSCVLCVSAYGLHGDVHINGCSDFDAEDMYGLDGEVAYADFNHTEVYIL  
 PPFAEPMIYPGAYKQAVTELKVCRRHNLKALSVMKDYPSNNHAPSAMVIYTRDEVEFGEE  
 NTLICHVTGFYPAPVNVSWTKNGQKVTESSTNVPYPNKNGPFTQISRLQFTAQLGDIYS  
 CTVQHLALTEPLTKIYKVEASAQPDGPGVPSVFCGVGLTLGLFGVAVGTFFLIKNECS.  
 >O49B GL832249.1: 577-1,128  
 MLVCSVYDFFPKYIKVSWLRDQGEVTSVDTSTEEMADGDWYYQTHSHLEHTPRSGEKISC  
 KVEHASLEKPLITDWDSSMPESERNKLAIGASGLILGLLISLAGFIYYRRKARG  
 >O50B GL831650 197.860-198.901  
 YQNI PSKIKVSWHRDQGEVTSVDTSTEEMEDGDWYYQTHCYLEYTPR  
 >O57B ENSONIG00000002259 GL831257.1: 1,608,728-1,609,986  
 LGVIAILLTINYNPCVTVSSDEYFQSRACCTFKGPHFEDMEYTRIISLNKIAVLEYNH  
 TRGSWIGFTPYTIEIAKFWNLNPFGTSEAKALCSTNLGYIQILSNVTDIPTIRVKSVKQH  
 SGGHPAMLVCSAFNFYPKQIRMIWLRNQKEVTTGVSYSSEVMPDGDWYYQIHSYLEYTPH

GEKITCVVEHLSVSEPI LAIWGLDPTLPVAARNKIIIVGICGLLLGFVIVSSSGFIYHKKK  
 SSGRVLIPV  
 >O57A ENSONIG00000002263 GL831257.1: 1,611,410-1,612,511  
 LYFFSQEHFASVHKIFLGSIKLCYTFGCFKSSDTQVCLTMDGDEVFYANFKNGSLIWDSK  
 IPTAFHVPIYAYSQALYSQRQCRDFVHDDWKQHKTIMNTKAPPEIIIIYPRDEVMKEEDNSL  
 ICLIKKFFPPSIKIKWTKNDIEVKVEDPFIKCLPNPDGTFYVFSHLDFVPEDGDIYSCSV  
 EHEALTEPLTKLWEVQTDEPSNGPDVFCGLGLSLGVIGVAVAGAFLYVKGRQYQSTQNS  
 >O77B GL831677 200.297-200.562  
 VKLHSTTPLSSHHPAMLVCSVDFDFPFSKIKVSWHRDGEVTSVDTSTEEMEDGDWYYQTH  
 CYLEYTPR  
 >O79B1 GL831379.1:603.285-604.145  
 DGYELYNDRCLFNSTELQDVEFIRSCYINKIEFVRFSSDVGKFGVGYTDFGMKNAEMWNK  
 DQGYLAAMRAQKETCYCKHNIDLWYTNVLSKSVTPSVRLHSTMAPGCHHPAMLVCSVYDFY  
 PKLIKVSWLRNGQEITSDITSTEEFANGDWLYQVHSHLEY  
 >O79B2 ENSONIG00000009129 GL831379.1: 618,993-627,882  
 MASKFLCFTLLFINICTADGYECYSSTRCLFNSTELKDIEFITSYYNKIEYVRFSSDVG  
 KFCVGYTEYGVKNAEYWNKNQALLAQMRAQKETCYCPNIGIWIYADVLSKSVTPSVRLHSTM  
 APGCHHPAMLVCSVYDFYPKLIKVSWLRNGQEITSDITSTEEFANGDWLYQVHSHLEYMP  
 RSGEKISCVVEHASLEKPLIINWVPPMPETERLIIIVGVVGLILGLILFLAGVIYRRRSGV  
 CAPGLMLVPSS  
 >O79A1 ENSONIG00000009128 GL831379.1: 610,349-612,847  
 MKVWVLLLLILSLVPCVSADDAHGSNFIIGCSADGENVLILDDEAVWYADFNKQTVGNAL  
 PAFVDPISFPGFYEEAVADQQICKQNLVTRKAMKDFPKELDPSSLIITYTVLNVELGVQ  
 NTLICHVTFGYFAPVNVWTWKNEQKVTEGTNTSVPFPNKDGSFKQTSRLQFIPKQGDVYS  
 CTVEHVALIQPMTKIFYGEKIQLSLFYIIQFHNSDLKLLYILR  
 >O79A2 GL831379.1: 614,307-615.228  
 PPSSLIITYTVLNVELGVQNFILICHVTFGYFAPVNVWTWKNEQKVTEGTNTSVPFPNKDGS  
 FKQTSRLDFIPKQGDVYSCTVEHVALIQPMTKIFYAVVNSDLILGPAMFCGVGLTVGVGLV  
 AAGIFLLIR  
 >O79A3 ENSONIG00000009132 GL831379.1: 630,011-633,534  
 MKMKLWVLLLVSSVLCVSADALHGDNWSGCSDDTGEAVLILDDEAVWYADFNKQEGYI  
 PLPPFVDPITFPQYEQAVANQQICRANLKVTRQAMKDVPELDPSSLIITYTVLNVELG  
 VPNILICHVTFGYFAPVNVWTWKNEQVTEGTSTSVFPNKDGSFKQTSRLNFIKQGDVY  
 SCTVEHVALTQPMTKFYDLVYSDLILGPAMFCGVGLTVGVGLVAAGIFLLIRATKCS  
 >O79A4 GL831379.1:677.714-677.994  
 DPPSCLVIYITLLHVELGVQNTLICHVTFGYFAPVNVITWNKNEQKVTEGTSTSIILFPNKDG  
 SFKQTSRLDLIPKRDVYSCTVEHVGLTQPTTKFDG  
 >O80B ENSONIG00000005905 GL832180.1: 12,190-16,972  
 MASSFLCLLFLISLSTVDGFMTYRLSRCDFNSTELKDIQFTDSYYNMIIEIRFDSNVGKF  
 VGFTDFGVKTAETWNNIPARLASMRAQKGTCKSNIDVRYHKLTSKSAQPTVKLHSTTPL  
 SSHHPAMLVCSVYDFPFSKIKVSWHRDGEVTSVDTSTEEMEDGDWYYQTHCYLEYTPRS  
 GEKISCVVEHASLEKPLITNWDPPSSSFFMPKIERKLAIGASGLILCLILSLAGFIYYRQ  
 RARGRILVPTN  
 >O97B1 ENSONIG00000004432 - GL831197.1: 3,529,581-3,531,898  
 EDGYFMFADFCVMHSRDPKTVEYLIDWYFNKEFTMQYNSTVGKWTGLTPAGLITASQFN  
 EDKFDVDQRKAQKQLTCVNNVDAVFNQVQENIAAPSMTLQEGDHTSTHDTILVCSVYDFY  
 PKHILVTWYLNQEV  
 >O97B2 ENSONIG00000004434 GL831197.1: 3,534,451-3,536,032  
 RCQFLINLFFSFLDCSINGDGYFMFADFWCAVHSRDREEVEYLIDWYFNKEFTMQYNSTV  
 GKWTGLTPAGLITASRFNEDSADILQRKVEKQLICVNNVDAVFNITVENMAAPSMTLQEG  
 DHTSSHDTILVCSVYDFYPKHILVTWYLNQEVTERVTCVEHVSLKEPKSSYWDSSLKQ  
 SDRSFLTGGLCALLLGLALILSLGLIYRRKTSDPFTSN  
 >O97A ENSONIG00000004441 GL831197.1: 3,645,982-3,653,566  
 MALSVIALILSAGAACYIQTQSHNFHYIYGYESDDVRVDAVDDDDVVAYADFNKEEVV  
 WVLPHLPQPAKDFKKMAYGVAKASTAHCHSVLGKAKNADPGAPLRQDPPDIYIYTRYEGE  
 ASVMNTLFCVANHFYPPINFTWTKNGVELTEGVANLRYRHRDGTFFHMISTLLFTPPQPG  
 DHYICTVEHQAAKVPVSKSWELKENMSRVSPFAVFFGVSVVLCCLIGFGTGVFFFIKQPN

ECLQI  
 >O745B ENSONIG00000003902 GL831745.1: 25,751-37,458  
 MASSFLCLLFIISLSTADGFKMYVLSRCDNFSTELKDMKYIRSYYNKKIEVTRFDSVDRKF  
 VGYTEYGVKKAETWNNDDQAHMAAFRVEKERYCYTNIWYRNILSKSAKPYVKLHSTPD  
 YSHHPAMLVCSVYDFFPSKIKVSWLRDQEVTSQVTSSTEEMADGDWYQTHSHLEYTPRS  
 GEKISCKVEHASLEKPLITDWDSSMPESERNKLAIGASGLILGLILSLAGFIYYRRKAQG  
 RILVPTN  
 >O745A ENSONIG00000003904 GL831745.1: 44,977-46,516  
 MKMKELLLFLSCVLCVSADPLHSDIAGGCSSESDEENMYGLDGEELAYTDFNKKEEYIPL  
 PPFIDPITYGEDAYESSVAFQKTCRKNMKQFGEKMDFFPEQDVPSAVMIYTRDEVEFGE  
 KNTLICHVTFGYFAPVNVSWTKNQKVTQGSINVPYLNKDGFTFTQISRLQFTPLGDIY  
 SCAVQHLALTQPLTKIYEVEASARSDPGVGPVFCVGLTGLLGLVAAGTFFLVKGNCS  
 >O779B GL831779 70180  
 YDFYFSEIKVSWHTDAQEVTSQVTSSTEEMTDGD\*YYQIHSLEYTPR  
 >O845A ENSONIG00000019001 GL831845.1: 36,104-40,196  
 MKMKVWVLLLVSSVICVSADGLYEMNSVSGCSDTDGEDVLILDDEVVWYADFNKQKQVD  
 SLPAPADHPSFEGKYEEAVANQLICRQNLKDMARTAMKDFPKQHEAPSSVAIYTTLNVEIG  
 VQNTLICHVTFGYFAPVNVSWTKNQKVTQGSINVPYLNKDGFTFTQISRLQFTPLGDIY  
 YACIVEHVALTQPLTKVYAVDNAEPIFGVGLTVGVGLVAAGIYLFIRGTRCD  
 >O845B ENSONIG00000019004 GL831845.1: 41,863-44,745  
 MDSSFLCFLSFFIILCRADGYEYTTSSRCLFNSTELRDIEYIRSYYNKKTEYVRFSSSVG  
 KFGVGYTEYGVREADQWNKQDQGSWTRKQGLAAMRAQKETYCKPKIDFWYQSVLTKAVKP  
 SVRLHSIPVYLNPAIILVCSVYNFYFPEIKVSWLRNGQVSPDITSTVEFANADWLYQTH  
 SYMEYTPRSGEKISCMVEHASLKEPLVTDWVPSMSESKKLMIVGAFGLILGLLFFLAGVI  
 YIRMSCSRGQSSTHTK  
 >OA35A AERX01073735.2:6-251  
 VEIGVQNTLICHVTFGYFAPVNVSWTKNQKVTQGSINVPYLNKDGFTFTQISRLQFTPLGDIY  
 GGDVYVCIVEHVSLTAPLTKIY  
 >OA35B AERX01073735.2:3.469-3.735  
 GYEYTTSSRCLFNSTELRDIEYIRSYYNRIEYVRFSSSLGMFVGYTEYGVKEADQWNNDD  
 PGQLAAMRAQKEIYCTPNIDLWYRSVLTK  
 >OA78B ENSONIG00000008338 AERX01073278.2: 2,515-4,762  
 MDSSFLCFLSFFIILCRADGYEYTTSSRCLFNSSSELRDIEYVRSYYNRIEYVRFSSSVG  
 MFVGYTEYGVREADQWNKQDQGLAVMRAQKETYCTPNIDLWYRSVLTKYVVPFVRLHWTK  
 PVDHHPAILACSIYDFYFPHYIKVTWLRNGQVTSNTTTTEELPDADWYQTHSYLEYTP  
 K  
 >OA78A ENSONIG00000008336 AERX01073278.2: 144-1,540  
 MCLCTDAPDSVEIYITVNVVEIGVQNTLICHVTFGYFAPVNVSWTKNQKVTQGSINVPYLNKDGFTFTQISRLQFTPLGDIY  
 SNKDGFTFTQISRLQFTPLGDIY  
 VGVGLVAAGIYLFIRGRK

### Tilapia translated Genbank cDNA report sequences:

>GR696948 cNonST1-012\_C05.ab1\_c Tilapia adult stomach library *Oreochromis niloticus* cDNA 5 similar to H-2 class II histocompatibility antigen, A-R alpha chain in *Mus musculus* (P14436), mRNA sequence O845A match  
 MKMKVWVLLLVSSVICVSADGLYEMNSVSGCSDTDGEDVLILDDEVVWYADFNKQKQVD  
 SLPAPADHPSFEGKYEEAVANQLICRQNLKDMARTAMKDFPKRHEAPSSVAIYTTLNVEIG  
 VQNTLICHVTFGYFAPVNVSWTKNQKVTQGSINVPYLNKDGFTFTQISRLQFTPLGDIY  
 YACIAEHVALTQPLTKVYAVDNVEPIFGVGLTVGVGLVAAGIYLFIRGRK  
 >GR667686 cNonOE1019\_D18.ab1\_c Tilapia adult olfactory epithelium library *Oreochromis niloticus* cDNA 5 similar to H-2 class II histocompatibility antigen, A-B alpha chain in *Mus musculus* (P14434), mRNA sequence O29A3 match  
 MMSHHTDMKHAPLLILILNFCVFSQIPHEMTYVVGCFVQGLTEVQFEFDGEEFLYADF  
 PKEEIVYTVPKFIFPDPShVLVGLSILKDALDNRDWCLIIITKIAAMEEKYPPEEKDPPEI  
 VLFSSDKVELGVENSLICLVNHFYPPSINVTWTKNGHPVSTGVSLSRYPNKDQTFHQLS



TLTFTPSEGDFYSCTVEHSALETPQTRIWEAEVTNSDQ  
 >GR671091 IIA cNonOE1\_014\_G17.ab1\_c Tilapia adult olfactory epithelium library  
 Oreochromis niloticus cDNA 5 similar to HLA class II histocompatibility  
 antigen, DP alpha chain in Homo sapiens (P20036), mRNA sequence O79A3 match  
 MKMKLWVLLLVSSVLCVSADALHGDNWISGCSDDTGEAVLILDDEAVWYADFNKQEGYI  
 PLPPFVDPTTFPGQYQAVADQQVCRANLKVTRQAMKDVPKELDPPSSLIIYTVLNVELG  
 VNILICHVTFGYFAPVNVWTWKNEQKVTEGTSISVFPFNKDGSKQTSRLNFIPKQGDV  
 YSCTVEHVALTQPMTKFYAVENSDDLILGPAM  
 >GR702301.1\_1 cNonTE2014\_G22.ab1\_c Tilapia adult testis library Oreochromis  
 niloticus cDNA 5' similar to RT1 class II histocompatibility antigen, A beta  
 chain in Rattus norvegicus (P06341), mRNA sequence O80B match  
 GGKREARGETRSGRRSACQVN\*TSARPTVKLHSTTPLSSHHPAMLVCSVYDFFPSKIKVS  
 WHRDGQEVTSDDVTSTEEMEDGDWYYQTHCYLEYTPRSGEKISCVVEHASLEKPLITNWIP  
 PHPHSCLRQRGTSLSAPQD  
 >GR627548 cNon16-40D022\_P07.ab1\_c Tilapia juveniles 16-40 days post-  
 fertilization library Oreochromis niloticus cDNA 5 similar to HLA class II  
 histocompatibility antigen, DQ(W1.1) beta chain in Homo sapiens (P01919), mRNA  
 sequence O57B match  
 XGGNMRIQNFYFYMFLSLFGLVSSDEDFYQSRACCTFKGPHFEDMEYTRIISLNKIAVLE  
 YNHTRGSWIGFTPYTIEIAKFWNLNPFPGTSEAKALCSTNLGYIQILSNVTDIPTIRVKS  
 KQHSGGHPAMLVCSAFNFYFKQIRMIWLRNQKEVTTGVSYSVEMPDGDWYYQIHSYLEY  
 PTHGEKITCVVEHLSVSEPIAIWDPTLPVAARNKIIIVGICGLLLGFV  
 >FF281534 AQAH-SP-0931 Spleen of Oreochromis niloticus infected with  
 Streptococcus agalactiae Oreochromis niloticus cDNA clone SP1179 5 similar to  
 MHC class II beta chain, mRNA sequence O79B2 match  
 MASKFLCFTLLFINICTADGYELYSSTRCLFNSTELKDIEFIRSYYNRMELIRFSDSDVG  
 KYVGYTEFGVKNAEMWNNDPGQLAAMRAQKETYCYQYVNGIWIYADVLSKSVTPSVRLHSTM  
 APGCHHPAMLVCSVYDFYFKWIKVSWVRNGQEITSDITSTEEFANGDWLYQVHSHLEYMP  
 RSGEKISCVVEHASLEKPLIINWVPPMPETERLIIVGAVGLILGLILFLAGVIYRRKSGD  
 TSLACRFSEKQAEWDKDAALSLWKPQKEMFFKPGSELCTNVLLKSV  
 >GR679428.1 cNonOV1024\_K05.ab1\_c Tilapia adult ovary library Oreochromis  
 niloticus cDNA 5' similar to HLA class II histocompatibility antigen, DQ(6)  
 alpha chain in Homo sapiens (P01906), mRNA sequence O97A match disrupted orf  
 MALSVIALILSAGAACGYIQTQSHNFHYIYGCEYSDDVRVDVAVDDDDVVAYADFNKKEEVV  
 WVLPHLPQPAKDFKKMAYGVAKASTAHCHSVLGKAKKC\*

## Spotted gar (*Lepisosteus oculatus*) MHC class II sequences:

### Spotted gar PreEnsembl sequences:

>501A1 MHCIIA JH591501: 64.610-66.685  
 MSVGWKCGLLVVMQGAATVAVEHTYEVAYFCQSENKGRNEVFDDDEMFIHDPDRKVD  
 EPRLPEFEKAWANDSSLIQGALANLGCENHLKGVMAIPDEPAVKVPPKPAVFPPEEPVE  
 LGWPNTLICALNDFTPTAQLRWLKNQGPVTSVSDVSDYIPLSSNKFAMFSYLSFTPQEG  
 DIYTCHVEHTALSEPVSFVWDAEVPTDSDASETAFCAIGLALGILGVVLGTVFLIKAIKF  
 HS  
 >501B1 MHCII B JH591501: 70.640-74.060  
 MRLVLLCSALVLCCLTSLGADDFVYFFRSECHFSASDLRDLVYVRSMTFNGKERVRFNSTV  
 GKYVGFDTWGEKQANYWNGQKDYIARLSADKDRFCKYVNVQLMASGMQDRKIKPEVKIYPA  
 KTASQGHTHMLVCHAHGFYPRQIAVSWLRNGQPVSDDLTSMSFASDGDWTYQTLLEYLEFT  
 PQGGETFECVADHVALDGTLLKLRWDPAAREAKRNKVMGASGLVGLVFAVIGVVYWKRK  
 TKGHRLVSSERLVSCVGVQVFSGLVSCPGCALPCAQCLLG  
 >501A2 MHCIIA JH591501: 82.102-84.669  
 TSHIDINVI GCKSDDPVAQDEAQLDGDDEMFIYADFDKEMILTLPAFADSFVDPGWVQGA

IANRQICINNLEVAIKAENPPENTDAPVNTIYPRDEVELGKPNLTLICLANNFFPPPVKV  
 RWTKNDVDVSEQATLSRYYPNSDATFYQFSTLSFTPLQGDVYSCSVEHKALPEPKTRIWG  
 EERSALTS DAN  
 >501B2 MHCII B JH591501: 95.883-99.847  
 MLMCSALGFYPKQIKVSWLRDQTVTSDVTSTEELADGDWYQI HSHLEYTPRAGESIVC  
 RVEHSSFATPKELTWDPSPMEADRNKIIIGASGLVLGLVIAAAGGIYYKKKSG  
 >501A3 MHCII A JH591501: 120.683-125.781  
 MHGIAVGSIACREISEWKPGRPCQGGDRDRAALGWIFRQDGDAPTAMVYPRDSVELGKPNL  
 LICSVTDFHPMGIGVTWTHNDRPVTEGVTQTTPLSGRDFSFVKVFSFLPFTPRLGDVYSCQ  
 VQHSALPEPLARLW  
 >615A MHCII A JH591615: 5.333-9.156  
 MLC AFLTAVLLGASGVLSQAQIRHLDRLLTFCVSNSTEAEELEKEHDEDEIFYVDLETKQS  
 VQRLPEFAEKWHVGPWFPPFAQQEVETCRLLYLA AKGEGFPPEEKLDPPISRLYSENEVELG  
 VPNALICFITDFHPAPVKVSWTRNTEPVTQGFNVTQYYSNKDYSRLFSYLSFTPOAGDV  
 YSCSVEHRALQEPLTRLWEVEVQSDSEAAETAVCGVGLTLGLLGVAAGTFFFLIKGNKCN  
 >615B MHCII B JH591615: 11.335-16.190  
 MDSPLHRLAVAVLVLGCTGSRRSVDGNMYQFVHDCEYNDHLEDFLYTRRDI FNKIEILRY  
 DSNIQTFVGYTPLGIKYAERFNQDKEYLAGLKDDLNYCKHNAGVYKSTMTDRKVPPSVK  
 VSATKLLSSKHPTMLVCHVTGFYPQRITVTWLRDGLEIKTDVTSTDLLANGDWTYQVHSH  
 LELTPRAGETVACRVEHSSLERPLEVTWDPSPMPESKKNKIVIGVSGLILGLIITAAGVIY  
 YKKKSSGRILVPSD

**For spotted gar MHC class II we could not find cDNA reports in GenBank.**
