# Supplementary material for: Comprehensive analysis of MHC class II genes in teleost fish genomes reveals dispensability of the peptide-loading DM system in a large part of vertebrates
Source: PubMed Central journal article supplement (PMC4219347; doi:10.1186/1471-2148-13-260), 2013-11-26
Supplement: 1471-2148-13-260-S8.pdf [file 1471-2148-13-260-S8.pdf]

## Supplementary Text 2 (Text S2): Atlantic salmon (*Salmo salar*) MHC class II sequences, transcripts and genomic regions

| Table of Contents |                                                                                                                                      | Page |
|-------------------|--------------------------------------------------------------------------------------------------------------------------------------|------|
| Table TS2-1       | Linkage group (LG) numbers, chromosome numbers, and GenBank contig sequence accession numbers of Atlantic salmon MHC class II loci   | 2    |
| Text S2-1         | Atlantic salmon MHC class II protein sequences used in this study                                                                    | 3    |
| Text S2-2A        | Expression pattern of Atlantic salmon MHC class II gene transcripts                                                                  | 5    |
| Table TS2-2A      | PKM values for Atlantic salmon MHC class II transcripts in various tissues                                                           | 5    |
| Table TS2-2B      | Tissue distribution of human MHC class II EST reads                                                                                  | 5    |
| Text S2-2B        | Atlantic salmon <i>DCB</i> , <i>DEA</i> and <i>DEB</i> tissue distribution analysis by RT-PCR experiments                            | 6    |
| Text S2-3         | Investigation of potential polymorphism of Atlantic salmon <i>DCB</i> , <i>DEA</i> and <i>DEB</i>                                    | 7    |
| Text S2-3A        | Sequence alignment of Atlantic salmon <i>DCB</i> alleles                                                                             | 8    |
| Text S2-3B        | Sequence alignment of Atlantic salmon <i>DEA</i> alleles                                                                             | 9    |
| Text S2-3C        | Sequence alignment of Atlantic salmon <i>DEB</i> alleles                                                                             | 12   |
| Table TS2-4       | Genes situated in Atlantic salmon <i>DEA/DEB</i> ( <i>Ssal_scf_10</i> ) and <i>DFAψ/DFBψ</i> ( <i>Ssal_scf_137</i> ) genomic regions | 14   |
| Text S2-4A        | <i>Ssa1_scf_10</i> : 411 kb scaffold sequence including <i>DEA/DEB</i> loci                                                          | 15   |
| Text S2-4B        | <i>Ssa1_scf_137</i> : 428 kb scaffold sequence including <i>DFAψ/DFBψ</i> loci                                                       | 89   |

**Table TS2-1. Linkage group (LG) numbers, chromosome numbers, and GenBank contig sequence accession numbers of Atlantic salmon MHC class II loci**

| Region                      | Chromosome    | Genbank ID Salmon genome contig              | MHCII genes                                       |
|-----------------------------|---------------|----------------------------------------------|---------------------------------------------------|
| LG6 <sup>1</sup>            | Chromosome 12 | AGKD01360529.1 Contig_360694                 | <i>DAA</i>                                        |
|                             | -“-           | AGKD01083185.1 Contig_083194                 | <i>DAA, DAB</i>                                   |
|                             | -“-           | AGKD01084552.1 Contig_084561                 | <i>DAB</i>                                        |
| LG5 <sup>2</sup>            | Chromosome 13 | AGKD01021571.1 Contig_021574                 | <i>DBA</i>                                        |
|                             | -“-           | AGKD01084147.1 Contig_084156                 | <i>DBB</i>                                        |
| <i>DCA/DCB</i> <sup>2</sup> | n.d.          | AGKD01037528.1 Contig_037532                 | <i>DCA, DCB</i>                                   |
|                             | n.d.          | AGKD01028197.1 Contig_028200                 | <i>DCB</i>                                        |
| <i>DDA</i> <sup>2</sup>     | n.d.          | AGKD01006140.1 Contig_006141                 | <i>DDA</i>                                        |
| LG1 <sup>3</sup>            | Chromosome 2  | Ssa1_scf_10<br>AGKD01038092.1 Contig_038096  | <i>DEA, DEB</i>                                   |
| LG12 <sup>3</sup>           | Chromosome 5  | Ssa1_scf_137<br>AGKD01017119.1 Contig_017120 | <i>DFA<math>\psi</math>, DFB<math>\psi</math></i> |

<sup>1</sup>First described by Moen et al. [(2008) A linkage map of the Atlantic salmon (*Salmo salar*) based on EST-derived SNP markers. *BMC Genomics* 9:223]

<sup>2</sup>First described by Harstad et al. [(2008) Multiple expressed MHC class II loci in salmonids; details of one non-classical region in Atlantic salmon (*Salmo salar*). *BMC Genomics* 9:193].

<sup>3</sup>A new Arachne (v3.9) assembly of 15,506,038 Sanger sequences ([www.ncbi.nlm.nih.gov/Traces](http://www.ncbi.nlm.nih.gov/Traces); as of June 2012; project\_name: International Cooperation to Sequence the Atlantic Salmon Genome [Davidson WS, Koop BF, Jones SJM, Iturra P, Vidal R, Maass A, Inge Jonassen I, Lien S, Omholt S (2010) Sequencing the genome of the Atlantic salmon (*Salmo salar*) *Genome Biol* 11(9):403] was constructed (BFK, unpublished) and scaffolds Ssa1\_scf\_10 and Ssa1\_scf\_137 were identified as containing *DEA/DEB* and *DFA $\psi$ /DFB $\psi$*  genes. Data from these scaffolds were matched contigs from a previous assembly (GenBank accession AGKD01000000) in which Contigs 360694-006141 were identified as corresponding to MHC class II genes *DAA, DAB, DBA, DBB, DCA, DCB* and *DDA* while contigs 038096 (AGKD01038092.1), 007503 (AGKD01007502.1), 085515 (AGKD01085506.1), 082232 (AGKD01082223.1), 163744 (AGKD01163719.1), 017120 (AGKD01017119.1), 057643 (AGKD01057639.1) and 000853 (AGKD01000853.1) were found to contain *DEA/DEB* and *DFA $\psi$ /DFB $\psi$*  genes. This assembly represents an intermediate assembly of an ongoing project of which AGKD01000000 is the first initial public assembly. As assembly AGKD01000000 is an initial assembly of an ongoing project, there are some discrepancies that remain to be resolved. For example there are two separate contigs with *DAA*. Our current improved assemblies identify only one contig containing *DAA* and *DAB*. Scaffolds were mapped to the salmon genome (chromosomes and linkage groups) by blasting the sequences against a list of SNP and extended source sequences [Lien et al. (2011) A dense SNP-based linkage map for Atlantic salmon (*Salmo salar*) reveals extended chromosome homeologies and striking differences in sex-specific recombination patterns. *BMC Genomics* 12:615] and identifying 100% matches.

## Text S2-1. Salmon MHC class II protein sequences used in this study

>Sasa-DAA\*0101 (GenBank L77086\_1) MHC class II alpha  
MKTSVIVLILCWQVYAEHKVLHIDLVTGCSDSGLDMYGLDGEEMWYADFNKQEGVVAL  
PPFADPFTFPGFYEQAVGNQGVCKGNLAKCIKAYKNPEEKIDPPHSSIIYPRDDVDLGVEN  
TLICHVSGFFPAPVRVRWTRNNQNLTGTVRLSTPYPNADFTLNQFSSLPFTPEEGDIYGC  
TVEHKGLAEPLTRIWPEPEVIQPSVGPVDFCGVGLTLGLLGVAAGTFFLIKGNQCN

>Sasa-DAB\*0101 (GenBank CAA49726) MHC class II beta  
MSMSIFCVSLTLVLSIFSGTDGYFEQVVRQCRYSSKDLQGIIEFIDSYVFNKAEYIRFNST  
VGKFBVGYTELGVKNAEAWNSDAAVLAVERGELERYCKHNADLHYSTILDKTVEPHVRLSS  
VAPPSGRHPAMLMCSAYDFYPKPIRVTWLRDGRVKSVDVTSTEELANGDWYQIHSLEY  
TPRSGEKISCMVEHISLTEPMVYHWDPSLPEAERNKIAIGASGLVLGAILALAGLIYYKK  
KSSGVL

>Sasa-DBA (GenBank EG757342, EU008541) MHC class II alpha  
MSFEMNYSVIIILITGAVCTSAAEIHHEIHFIFGCFESSDPAVGLEIDGDEVFYGFNKNS  
NTCLIADVFTLPKFISITPEDKERACEYATISRVWCKDCIAWKGQSEPKIPKIKDAPES  
TIYPRDEVELGVENTLICFVNDFFPPPVKVYWTKNEMEVTEGLSLSRYYPNKDGTTFHQFS  
SLSFTPQKEDVYICAVAHTALKEPKTREYKVSAGGPAVFCGVGLTLGLLGVATGIF  
LIYKGRATESQE

>Sasa-DBB (GenBank DY726096, EU008541) MHC class II beta  
MYVLNCFSIHLLLLLFSLSLEVVDSSDEDFAHDDAWCRFSSRDLHNMEYILEHHFNKILVA  
QYNSTTERWTGYTAWGVISA EKWNEDPDEIPRRRTDMGVLCCKPYANRIYNATEMFMVEPN  
VTLRLEGPSSDSSLVCSVHFFYPKHIRVTWLRNGEEVTSVDVTSTDVLANGLWSYQIQSYL  
KYTPTTGERITCMVEHISQTEPKLYYWDPSLPKSEKNKIVIGVCGLLLGVVFFVAGLIYW  
AKSTGRLLGLIGERYGTCD

>Sasa-DCA (GenBank DW549478, DY704572) MHC class II alpha  
MNLVVAIVVLTAVVCTSAAEIPHETVYVVLGCLEKTKVKAELQLDGEVVYADFQSGQEV  
WTLPEFLGPFSSSTVRNFYKNAVKGRRLCRDALALWIFEEKSPPEVKDAPESTIYPRAEE  
ELGVENTLICFANHFFPPPVKVNWTKNGLEVTEGTSLSRYYPNEDGTTFHQFSSLSFTPQE  
GDVYGGCTVVKHTALEDPKTRFWEYEVREVSAGGPAVFCGVGLTLGLLGVATGTFLYVVK  
QQFN

>Sasa-DCB (GenBank KC316031) MHC class II beta  
(the N-terminus indicated in small font derives from genomic sequence at  
GenBank AGKD01037528 and was confirmed by transcriptome reads)  
msvlnlssihLLLLLFSLSLGVGDGYFGHFEMRCRFSSDPRDIEYLLQVYGNKLLGQY  
NSTTEKCTVYTQWMKNFTETACKGPAFLSERREEMNKYCSSNVPVVYGYLLDKAVEPY  
IRLRVSEFSTRHPAMLVCSAYDFYPKPIRVTWLRDQEVTSNVTSTEELVNGDWTYQ  
IHSLEYTPTPGERITCMVEHFSLTPKLYDWDPSPGPERNKMVIGACGLLLGVVFI  
AAGLIYYRKKSTEGRVLEPTMALPESYGTI

>Sasa-DDA AGKD01006140.1\_Contig\_006141 (GenBank DW557800) MHC class II  
alpha  
MMALVFMILLFMLSSTQGGQEQHFVFNINTRSETEEFNMTIVVDDNEYLVHLYLNNKEGVVT  
LPEWGNVYDPCICVRVAESRRADLNNDIKLFNLETPEAKVPPEIKLYAKDEVKLGINNSL  
VCFVNNFFPPPQVQKWTKNDENVPKGVKVGQYATNSDYTFYRFSTLTFEPQEGDIYTCIV  
DHTALDEPLTRTWEFEVPPRASVGPVAVFCGLGLTLGLLGVATGTFFLVKGTQCQ

>Sasa-DEA (GenBank KC316032) MHC class II alpha  
MGRVFLAFILGVCLLSHCQSKHLLRFLTFCQKNVPSDEEYDVEFDGDELFFYVDSITY  
QVERRLSEFAQQWTPDPGLPHEVYVSLGTCQYNI PCIVGEKSPPEAIEVPTSHIYSQ  
REVELGVPNTLICRVSDHFPTPVDVTWTRNEQPVAERTIIQTQYYSNEDFSFRIFSYL  
SITPQEGDIYSCSVGHVSLQEPPLTRIWEEVHTDHQTVETA VCVGGVTLGVVGVATGV  
WFIKKAKRSGWALRT

>Sasa-DEB (GenBank KC316036) MHC class II beta  
(the N-terminus indicated in small font derives from genomic  
sequence at GenBank AGKD01038092 and was confirmed by  
transcriptome reads)  
malcwVYWMAGLSVIQTWATPAGGYQFQGI VDC EYDDTIDNMIYFVKNI F DQKLTTIY  
DSRVQKYVGFGEFGIRNADRYNSQAWKMAIRKAEVETICRYSAIFFKLSLTERIVPPI  
VKVRLTKPSRYGELSMLECSVLGFYPQEV RVSWLRDGL ETTTAVTSTD TLANGDWSYQ  
LHSYLEFRPQRGESVSCMVEHPSLDEPLEVVWDTSGLD AKWFKMAIGVCSLFIGVAMA  
IGGGVYYWKNRSGFRVNR

>Sasa-DFA $\psi$  (GenBank AGKD01017119) MHC class II alpha pseudogene  
(combination of encoded fragments)  
MGCRVFLALILGVCLLSHCQS-  
KHLRLFLTFQCQKNITH-  
KEYDVEFEDELFYVDPMTYRVERRLSAFAQQWTRDPGLPHEVNVSLGTCQYNI PCCIVGEN-  
EAPTSHIYSQREVELGDPNTLICRVSDFHPTSVDVTWTRNEQPVGEGTVSLTQYYSNENFSFRIFS YLSITPQEG  
DIYSCSVGHVSLQEPLTRIW-  
EVEVHTDHQTVETAVCVGGVTLGVVGVAT-  
KKAKRSGWALRT

>Sasa-DFB $\psi$  (GenBank AGKD01017119) MHC class II beta pseudogene  
(combination of encoded fragments)  
AGLPVIHTWETPA-  
GGYQFQGIVDCEYDTIDNMIYFVKNIFNQKLTIIYGARVQKYMGEY GIRNADHYNS  
QAWKMAIRKA\*VETICPYSARFFKLSTLERI-  
VPPTVKVCLTKTSRYGELSMLE-  
DTSGLHTKWFKMAIGVCSLFIGVAMAIGGVYYWKNR

### Text S2-2A. Expression pattern of Atlantic salmon MHC class II gene transcripts

Expression of Atlantic salmon class II genes was estimated by transcriptome analysis and by gene-specific RT-PCR analysis. The transcriptome data, using tissues of a one-year old salmon (Table TS2-2A), agree fully with our previous RT-PCR analyses on *DAA*, *DAB*, *DBA*, *DBB*, *DCA* and *DDA* [Harstad et al. (2008) *BMC Genomics* 9:193-209] and our present RT-PCR analyses on *DCB*, *DEA* and *DEB* (Text S2-2B). They show that the classical *DAA* and *DAB* genes are expressed abundantly and ubiquitously, whereas the nonclassical genes are expressed at much lower levels and in some cases, especially for *DCA*, *DCB* and *DEA*, in a more tissue-restricted manner. In comparison, the tissue distribution of human nonclassical *DM* and *DO* genes is relatively similar to that of human classical class II genes and the relative expression levels of *DM* and *DO* in comparison with classical genes tend to be higher than the low nonclassical/classical expression ratios found in salmon (compare Tables TS2-2A and -B).

Table TS2-2A. RPKM values for Atlantic salmon MHC class II transcripts in various tissues

| Tissues\ Gene      | DAA    | DAB    | DBA  | DBB  | DCA  | DCB   | DDA   | DEA  | DEB  | Total # reads |
|--------------------|--------|--------|------|------|------|-------|-------|------|------|---------------|
| Brain              | 5.99   | 3.54   | 0    | 0.04 | 0    | 0     | 0.29  | 0    | 0    | 58939250      |
| Eye                | 9.03   | 6.01   | 0    | 0    | 0.02 | 0     | 0.63  | 0    | 0.02 | 60380888      |
| Gills              | 394.69 | 234.79 | 0.52 | 0.04 | 0.36 | 0     | 6.50  | 0.45 | 0.05 | 59793962      |
| Gut                | 259.73 | 221.51 | 0.16 | 0.11 | 8.10 | 19.60 | 1.54  | 0    | 0.02 | 59806348      |
| Head kidney        | 238.07 | 155.41 | 1.67 | 0.99 | 0.23 | 0     | 8.28  | 0    | 0.07 | 59084708      |
| Kidney             | 104.31 | 61.50  | 0.89 | 0.25 | 0.29 | 0.04  | 4.25  | 0    | 0.05 | 61054936      |
| Heart              | 15.61  | 8.36   | 0.14 | 2.61 | 0.05 | 0     | 0.76  | 0    | 0    | 58163180      |
| Liver              | 15.11  | 9.22   | 0.25 | 2.28 | 0.02 | 0     | 0.43  | 0    | 0    | 58784272      |
| Muscle             | 20.56  | 12.18  | 0.09 | 0.04 | 0    | 0     | 0.60  | 0    | 0    | 61426586      |
| Nose               | 130.25 | 72.91  | 0.16 | 0.09 | 0.30 | 0     | 1.76  | 0.02 | 0.05 | 59545012      |
| Pyloric caecum     | 41.36  | 26.77  | 0.18 | 0.12 | 7.75 | 12.84 | 1.11  | 0.15 | 0    | 61602874      |
| Spleen             | 677.01 | 291.31 | 4.40 | 2.12 | 0.07 | 0.04  | 27.90 | 0.02 | 0.23 | 60203316      |
| Contig length (bp) | 708    | 738    | 740  | 783  | 735  | 789   | 705   | 744  | 708  |               |

RPKM = Reads Per Kilobase per Million mapped reads. Mapping reads back to our unpublished Atlantic salmon reference transcriptome was done with CLC v 5.1.5 software. Reads were mapped with high stringency i.e. greater than 95% identity over more than 90% of the total length of the query read. The transcriptome was based on analysis of tissues of a single one-year old individual and contained > 70,000 non-redundant contigs.

Table TS2-2B. Tissue distribution of human MHC class II EST reads

|            | DMA | DMB | DOA | DOB | DPA1 | DPB1 | DQA1 | DQB1 | DRA  | DRB1 |
|------------|-----|-----|-----|-----|------|------|------|------|------|------|
| Blood      | 89  | 16  | 40  | 24  | 49   | 106  | 237  | 204  | 343  | 220  |
| Brain      | 19  | 10  | 8   | 0   | 68   | 33   | 21   | 25   | 45   | 84   |
| Intestine  | 43  | 25  | 4   | 12  | 81   | 64   | 103  | 81   | 142  | 301  |
| Kidney     | 56  | 47  | 75  | 9   | 90   | 52   | 66   | 52   | 118  | 185  |
| Liver      | 14  | 9   | 4   | 0   | 19   | 19   | 38   | 9    | 112  | 38   |
| Lung       | 247 | 53  | 62  | 8   | 274  | 218  | 215  | 197  | 893  | 809  |
| lymph node | 178 | 156 | 200 | 133 | 468  | 791  | 601  | 390  | 1649 | 835  |
| Muscle     | 47  | 9   | 0   | 9   | 9    | 75   | 9    | 28   | 75   | 141  |
| Pharynx    | 834 | 761 | 0   | 49  | 1154 | 245  | 736  | 245  | 3167 | 687  |
| Skin       | 9   | 9   | 14  | 0   | 23   | 23   | 18   | 14   | 251  | 460  |
| Spleen     | 131 | 149 | 74  | 74  | 149  | 374  | 149  | 449  | 505  | 618  |
| Thymus     | 75  | 37  | 25  | 25  | 62   | 188  | 100  | 62   | 100  | 313  |
| Tonsil     | 646 | 176 | 58  | 352 | 2173 | 2350 | 1233 | 1527 | 2585 | 3466 |
| Uterus     | 129 | 103 | 8   | 0   | 176  | 236  | 103  | 103  | 715  | 349  |

EST numbers according to "EST Profile Viewer" at Unigene, NCBI <http://www.ncbi.nlm.nih.gov/unigene/>  
Numbers indicate gene-specific ESTs per million ESTs.

**Text S2-2B. Atlantic salmon *DCB*, *DEA* and *DEB* tissue distribution analysis by RT-PCR experiments**

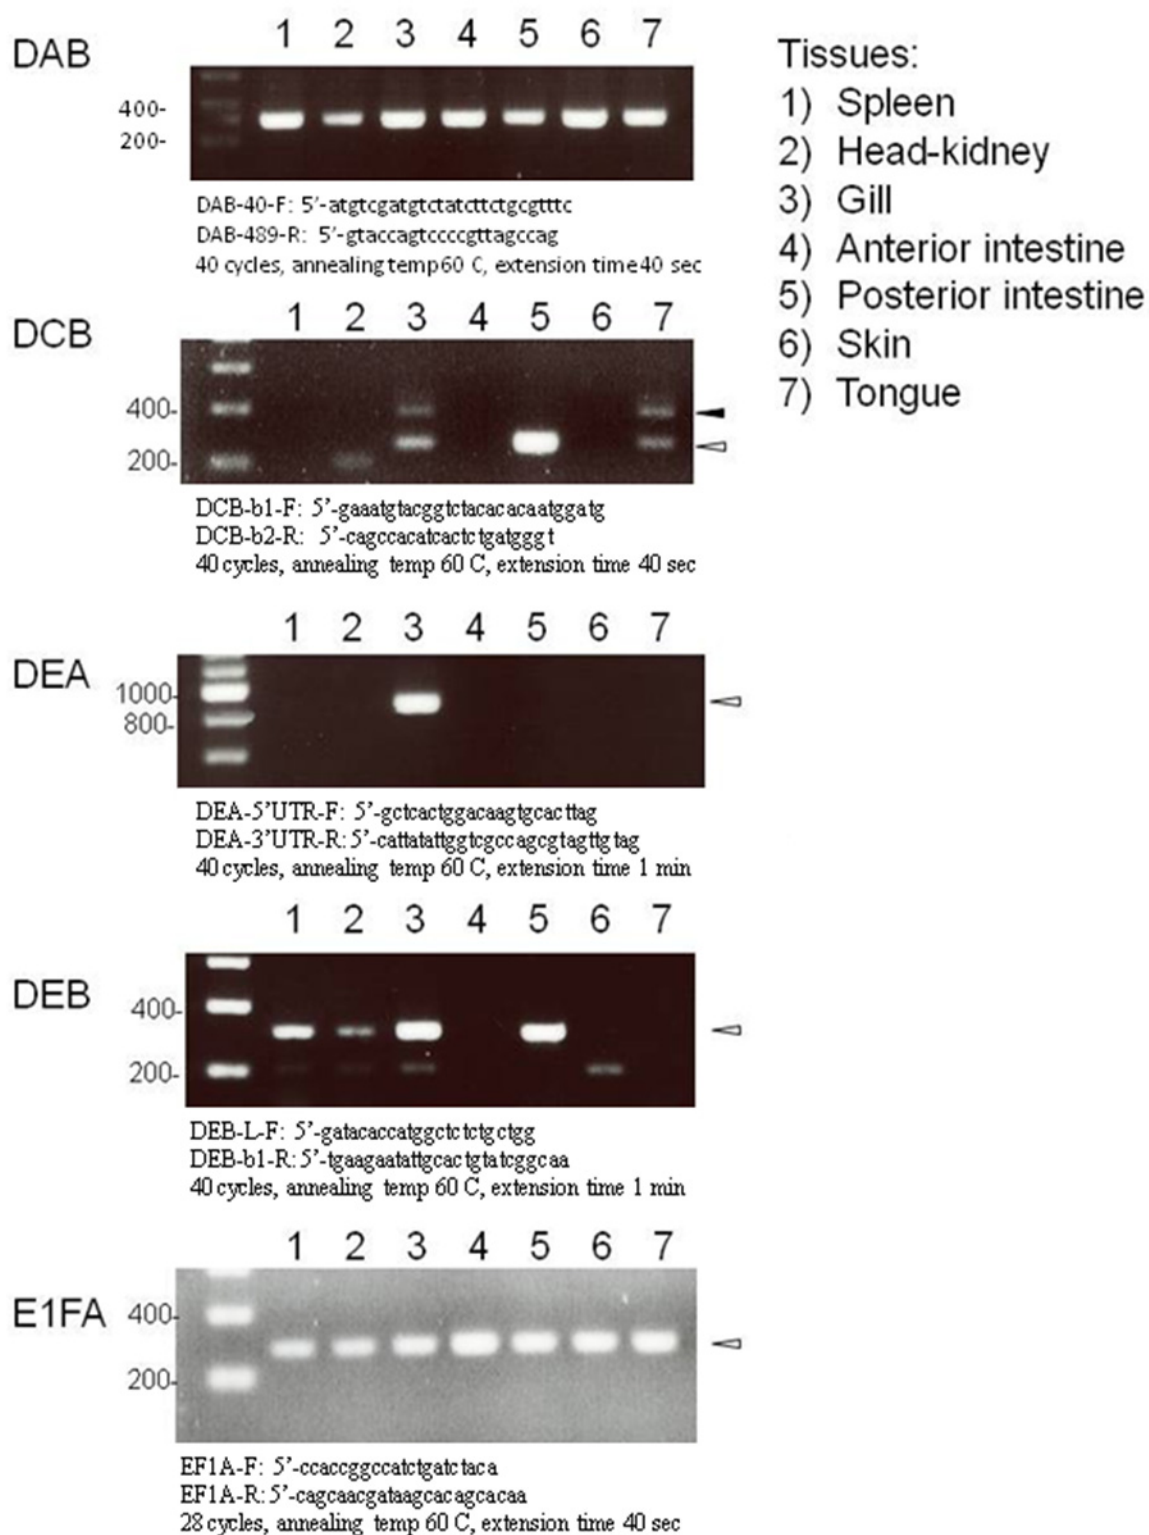

◄=probably genomic DNA

◄=cDNA

Tissues:

- 1) Spleen
- 2) Head-kidney
- 3) Gill
- 4) Anterior intestine
- 5) Posterior intestine
- 6) Skin
- 7) Tongue

For RT-PCR analysis, RNA samples from tissues of three adult Atlantic salmon individuals from a Norwegian fish-farm preserved in RNAlater (Qiagen) were isolated using two-fold purification by TRIzol (Gibco), after which equal amounts of RNA were transcribed into cDNA using random hexamer primers and Superscript (Invitrogen). For analysis of tissue distribution, PCR was then performed using equal amounts of cDNA solution, ExTaq polymerase (Takara) and the primers and cycle numbers indicated in the figures in this paragraph. RT-PCR analysis of *DAB* and “housekeeping gene” *EIFA* served as positive controls. The figures show representative data obtained for a single salmon.

### **Text S2-3. Investigation of potential polymorphism of salmon *DCB*, *DEA* and *DEB***

Except for the amplifications shown above (Text S2-2B), also other *DCB*, *DEA* and *DEB* fragments were amplified from cDNA of the Atlantic salmon individuals from Norway in order to obtain more sequence information. For these amplifications ExTaq polymerase (Takara) and the following primer combinations were used:

(1) DCB-L-F (5'-TGTGCTGAATCTCTCGTCCATCC) +  
DCB-3'UTR-R (5'-GTTTGTACATCTGAAAATACCTTACAAAATCA)

(2) DEA- $\alpha$ 1-F (5'-CAAACATTTGCTGCGGTTTTTGACC) +  
DEA-3'UTR-R (5'-CATTATATTGGTCGCCAGCGTAGTTGTAG)

(3) DEB-L-F (5'-GATACACCATGGCTCTCTGCTGG) +  
DEB-TM-R (5'-CTCCAATAGCCATGGCTACACCA)

(4) DEB- $\beta$ 2-F (5'-CTGTCCATGCTGGAGTGCAG) +  
DEB-3'UTR-R (5'-ACACGCTCCAGAAGGTATATTTCACTG)

Furthermore, from genomic DNA of six Atlantic salmon individuals farmed in Canada, but originally derived from Norwegian stock, PCR fragments of *DCB*, *DEA* and *DEB* were amplified using ExTaq polymerase (Takara) and the following primer sets of which the primers are indicated in the below figures (Text S2-3A-to-C) with arrows:

(5) DCB- $\beta$ 1-F (5'-GAAATGTACGGTCTACACACAATGGATG) +  
DCB- $\beta$ 2-R (5'-CAGCCACATCACTCTGATGGGT)

(6) DEA- $\alpha$ 1-F (5'-CAAACATTTGCTGCGGTTTTTGACC) +  
DEA- $\alpha$ 1-R (5'-CTATTGCCTCTGGCGGGCTCTT)

(7) DEB- $\beta$ 1-F (5'-GTGGGTACCAGTTCCAGGGGATAGTTGAC) +  
DEB- $\beta$ 1-R (5'-TGAAGAATATTGCACTGTATCGGCAA)

PCR fragments were cloned into plasmids, and for each individual multiple clones were sequenced. To account for possible PCR errors, sequences were only validated when obtained by independent amplifications.

In Texts S2-3A to-C the various (assembled) *DCB*, *DEA* and *DEB* sequences that we determined from the various Norwegian and Canadian salmon individuals are compared and provide an estimation of polymorphism. Only few different sequences were found, and they are not listed here per individual. Encoded amino acids are placed above the 2<sup>nd</sup> nucleotide of codons, and variable amino acids are shown below. Gen.=genomic; cDNA pred= cDNA sequence predicted from a genomic DNA sequence; TM= transmembrane domain; Cy= cytoplasmic tail. Polymorphic sites are marked orange. Alleles are numbered according to a nomenclature system described at <http://www.ebi.ac.uk/ipd/mhc/fish/index.html>. GenBank accession numbers are: *DCB*, KC316026-KC316031; *DEA*, KC316032-KC316035; *DEB*, KC316036.

Although there is some oligomorphism in *DCB*, this is highly different from the classical type polymorphism observed for the salmon *DAA* and *DAB* genes (<http://www.ebi.ac.uk/ipd/mhc/fish/index.html>). The *DEA* and *DEB* sequences are close to monomorphic, and their limited level of allelic variation is also found in many non-MHC molecules in fish [e.g., Guryev V, et al. (2006) Genetic variation in the zebrafish. *Genome Res* 16(4):491-497].

### Text S2-3A. Sequence alignment of Atlantic salmon *DCB* alleles

|                    |      |                                                               |                                         |          |     |
|--------------------|------|---------------------------------------------------------------|-----------------------------------------|----------|-----|
| Sasa-DCB*0103 cDNA | 1:   |                                                               | L L                                     | ACCTACTG | 8   |
|                    |      | beta1-domain >                                                |                                         |          |     |
|                    |      |                                                               | L L F S S L S G V D G Y F G H F E M R C |          |     |
| Sasa-DCB*0103 cDNA | 9:   | CTTCTCTTCTCTCTCTGTCTGGAGTAGATGGCTATTTTGGACACTTTGAGATGAGGTGT   |                                         |          | 68  |
|                    |      |                                                               | R F S S E D P R D I E Y L L Q V Y G N K |          |     |
| Sasa-DCB*0103 cDNA | 69:  | CGGTTTCAGCTCCGAGGATCCCCGAGATATTGAGTATCTGCTGCAGGTCTACGGCAACAAG |                                         |          | 128 |
|                    |      |                                                               |                                         |          |     |
|                    |      |                                                               | K L L G Q Y N S T T E K C T V Y T Q W M |          |     |
| Sasa-DCB*0103 cDNA | 129: | AAGTTACTGGGACAATACAACAGCACAAACAGAGAAATGTACGGTCTACACACAATGGATG |                                         |          | 188 |
|                    |      |                                                               |                                         |          |     |
|                    |      |                                                               | K N F T E T A C K G P A F L S E R R E E |          |     |
| Sasa-DCB*0101 gen. | 1:   | AAGAACTTCACTGAAACGGCCCTGCAAAGGCCCTGCTTTTCTGTCCGAAAGGAGAGAAGAA |                                         |          | 60  |
|                    |      |                                                               | K N F T E T A C K G P A F L A E R R E E |          |     |
| Sasa-DCB*0102 cDNA | 1:   | AAGAACTTCACTGAAACGGCCCTGCAAAGGCCCTGCTTTTCTGTCCGAAAGGAGAGAAGAA |                                         |          | 60  |
| Sasa-DCB*0102 gen. | 1:   | AAGAACTTCACTGAAACGGCCCTGCAAAGGCCCTGCTTTTCTGTCCGAAAGGAGAGAAGAA |                                         |          | 60  |
|                    |      |                                                               | K N F T E T A C K G P A F L S E R R E E |          |     |
| Sasa-DCB*0103 cDNA | 189: | AAGAACTTCACTGAAACGGCCCTGCAAAGGCCCTGCTTTTCTGTCCGAAAGGAGAGAAGAA |                                         |          | 248 |
| Sasa-DCB*0103 gen. | 1:   | AAGAACTTCACTGAAACGGCCCTGCAAAGGCCCTGCTTTTCTGTCCGAAAGGAGAGAAGAA |                                         |          | 60  |
|                    |      |                                                               | K N F T E T A C K G P A F L A D R R E E |          |     |
| Sasa-DCB*0201 gen. | 1:   | AAGAACTTCACTGAAACGGCCCTGCAAAGGCCCTGCTTTTCTGTCCGAAAGGAGAGAAGAA |                                         |          | 60  |
|                    |      |                                                               |                                         |          |     |
|                    |      |                                                               | M N K Y C S S N V P V V Y G Y L L D K A |          |     |
| Sasa-DCB*0101 gen. | 61:  | ATGAATAAATACTGCAGCAGCAACGTTCTGTGGTATATGGGTACTTACTAGATAAGGCA   |                                         |          | 120 |
|                    |      |                                                               | M N K Y C S S N V P V V Y G Y L L D K A |          |     |
| Sasa-DCB*0102 cDNA | 61:  | ATGAATAAATACTGCAGCAGCAACGTTCTGTGGTATATGGGTACTTACTAGATAAGGCA   |                                         |          | 120 |
| Sasa-DCB*0102 gen. | 61:  | ATGAATAAATACTGCAGCAGCAACGTTCTGTGGTATATGGGTACTTACTAGATAAGGCA   |                                         |          | 120 |
|                    |      |                                                               | M N K Y C S S N V P V V Y G Y L L D K A |          |     |
| Sasa-DCB*0103 cDNA | 249: | ATGAATAAATACTGCAGCAGCAACGTTCTGTGGTATATGGGTACTTACTAGATAAGGCA   |                                         |          | 308 |
| Sasa-DCB*0103 gen. | 61:  | ATGAATAAATACTGCAGCAGCAACGTTCTGTGGTATATGGGTACTTACTAGATAAGGCA   |                                         |          | 120 |
|                    |      |                                                               | M K Y C S S N V P V V Y G Y L D K A     |          |     |
| Sasa-DCB*0201 gen. | 61:  | ATGAAGAAATACTGCAGCAGCAACGTTCTGTGGTATATGGGTACTTACTAGATAAGGCA   |                                         |          | 120 |
|                    |      |                                                               |                                         |          |     |
|                    |      | Intron >                                                      |                                         |          |     |
| Sasa-DCB*0101 gen. | 121: | GGTAAGTGTATGAGTACATACTCAATGGTAGTGATAAGGAGGAGTACATACTAGATGAGA  |                                         |          | 180 |
| Sasa-DCB*0102 cDNA | 121: | G-----                                                        |                                         |          | 121 |
| Sasa-DCB*0102 gen. | 121: | GGTAAGTGTATGAGTACATACTCAATGGTAGTGATAAGGAGGAGTACATACTAGATGAGA  |                                         |          | 180 |
| Sasa-DCB*0103 cDNA | 309: | G-----                                                        |                                         |          | 309 |
| Sasa-DCB*0103 gen. | 121: | GGTAAGTGTATGAGTACATACTCAATGGTAGTGATAAGGAGGAGTACATACTAGATGAGA  |                                         |          | 180 |
| Sasa-DCB*0201 gen. | 121: | GGTAAGTGTATGAGTACATACTCAATGGTAGTGATAAGGAGGAGTACATACTAGATGAGA  |                                         |          | 180 |



Sasa-DCB\*0101 gen. 181:TAGATGAACATCATGAAAAGAGCACGAGGCAAGCCCTGAAGAACCCAGTATGTTCTTCCC 240  
Sasa-DCB\*0102 cDNA 121:-----TTGAGCCCTACATCAGGCTGAGATCAGTGGAGTCATTCAGTACCAGACACCCG 121  
Sasa-DCB\*0102 gen. 181:TAGATGAACATCATGAAAAGAGCACGAGGCAAGCCCTGAAGAACCCAGTATGTTCTTCCC 240  
Sasa-DCB\*0103 cDNA 309:-----TTGAGCCCTACATCAGGCTGAGATCAGTGGAGTCATTCAGTACCAGACACCCG 309  
Sasa-DCB\*0103 gen. 181:TAGATGAACATCATGAAAAGAGCACGAGGCAAGCCCTGAAGAACCCAGTATGTTCTTCCC 240  
Sasa-DCB\*0201 gen. 181:TAGATGAACATCATGAAAAGAGCACGAGGCAAGCCCTGAAGAACCCAGTATGTTCTTCCC 240

beta2 domain >

V E P Y I R L R S V E S F S T R H P  
Sasa-DCB\*0101 gen. 241:TCTCCAGTTGAGCCCTACATCAGGCTGAGATCAGTGGAGTCATTCAGTACCAGACACCCG 300  
V E P Y I R L R S V E S F S T R H P  
Sasa-DCB\*0102 cDNA 122:-----TTGAGCCCTACATCAGGCTGAGATCAGTGGAGTCATTCAGTACCAGACACCCG 174  
Sasa-DCB\*0102 gen. 241:TCTCCAGTTGAGCCCTACATCAGGCTGAGATCAGTGGAGTCATTCAGTACCAGACACCCG 300  
V E P Y I R L R S V E S F S T R H P  
Sasa-DCB\*0103 cDNA 310:-----TTGAGCCCTACATCAGGCTGAGATCAGTGGAGTCATTCAGTACCAGACACCCG 362  
Sasa-DCB\*0103 gen. 241:TCTCCAGTTGAGCCCTACATCAGGCTGAGATCAGTGGAGTCATTCAGTACCAGACACCCG 300  
V E P Y I S L R S V E P F S T R H P  
Sasa-DCB\*0201 gen. 241:TCTCCAGTTGAGCCCTACATCAGCTGAGATCAGTGGAGCCGTTTTCAGTACCAGACACCCG 300

A M L V C S A Y D F Y S  
Sasa-DCB\*0101 gen. 301:GCTATGCTCGTGTGCAGTGCCTACGACTTCTACTCCAA 338  
A M L V C S A Y D F Y P  
Sasa-DCB\*0102 cDNA 175:GCCATGCTCGTGTGCAGTGCCTACGACTTCTACTCCAA 212  
Sasa-DCB\*0102 gen. 301:GCCATGCTCGTGTGCAGTGCCTACGACTTCTACTCCAA 338  
A M L V C S A Y D F Y P K P I R V T W L  
Sasa-DCB\*0103 cDNA 363:GCCATGCTCGTGTGCAGTGCCTACGACTTCTACTCCAAACCCATCAGAGTACAGTGGCTG 422  
Sasa-DCB\*0103 gen. 301:GCCATGCTCGTGTGCAGTGCCTACGACTTCTACTCCAA 338  
A M L V C S A Y D F Y S  
Sasa-DCB\*0201 gen. 301:GCTATGCTCGTGTGCAGTGCCTACGACTTCTACTCCAA 338

R D G Q E V T S N V T S T E E L V N G D  
Sasa-DCB\*0103 cDNA 423:AGGGACGGACAGGAAGTACCTCAAATGTGACTTCCACAGAGGAGCTGGTCAATGGGGAC 482

W T Y Q I H S H L E Y T P T P G E R I T  
Sasa-DCB\*0103 cDNA 483:TGGACCTACCAGATCCACTCGCACCTGGAGTACACACCCACACCTGGAGAGAGAATCACC 542

Linker/TM/CY domains >

C M V E H F S L T E P K L Y D W D P S L  
Sasa-DCB\*0103 cDNA 543:TGTATGGTGGAGCACTTCAGCCTCACTGAGCCAAACTGTATGACTGGGACCCCTCCCTG 602

P G P E R N K M V I G A C G L L L G V V  
Sasa-DCB\*0103 cDNA 603:CCTGGGCTGAGAGGAATAAGATGGTATCGGGCCCTGTGGACTGCTGCTGGGGTGGTC 662

F I A A G L I Y Y R K K S T E G R V L E  
Sasa-DCB\*0103 cDNA 663:TTTATAGCAGCTGGACTGATCTACTACAGGAAGAAATCTACTGAAGGACGAGTGTGGAG 722

3' UTR >

P T M A L P E S Y G T I \*  
Sasa-DCB\*0103 cDNA 723:CCGACCATGGCGCTGCCAGAAAGTTATGGCACCATATAGTGGTTCACACCAGTCTGCCTT 782  
Sasa-DCB\*0103 cDNA 783:CTGAAGGTTGTGATCTGAACCCACTTAATTAGTCTGGGTGCCAGTCTTTTGTAGTAAACAT 842  
Sasa-DCB\*0103 cDNA 843:TCCACTCCTCGTAGCCTTTTCCGTGACATATGCCAAGCAGGTCGAGTAGTGGAGTGTGAG 902  
Sasa-DCB\*0103 cDNA 903:CTAAAAAGACTGGTACCCAGACTACCCACTTAATCATTCCAAGCATAATGTCCTCTGTCT 962  
Sasa-DCB\*0103 cDNA 963:CCCAGGCCTTTTGCATTGGAGGAGAGGAGGTTGCAGCCAGAAACTCCCAAGGCCCTTC 1022  
Sasa-DCB\*0103 cDNA 1023:TATAGGGATCACAATCACGACATTCAGATCAAGAGTTTACCACCGAGTGGCCAACGTGAT 1082  
Sasa-DCB\*0103 cDNA 1083:CAAATCTATGTCCACATCCTGTGCGTCTGAGACGTTAGATCTATGATA 1130

### **Text S2-3B. Sequence alignment of Atlantic salmon *DEA* alleles**

Sasa-DEA\*0101 cDNA pred is a sequence predicted from our Ssa1\_scf\_10 genomic sequence (Table TS2-1), while the Sasa-DEA\*0102 and \*0103 cDNA sequences were obtained from individuals from a Norwegian farm. In salmon individuals from a Canadian fish farm, for which genomic fragments between arrows were amplified and sequenced, sequences matching Sasa-DEA\*0101 and \*0102/\*0103 were found. Although not shown in Text S2-2B, also splicofoms without the  $\alpha 2$  exon were detected ( $\Delta\alpha 2$ ).

```

Leader >
      M G C R V F L A F I L G V C L L S H C Q
Sasa-DEA*0101 cDNA pred  1:-ATGGGGTGCAGAGTGTTCCTGGCTTTTATACTGGGTGTTTGTCTACTGTACACTGCCA 59
      M G C R V F L A F I L G V C L L S H C Q
Sasa-DEA*0102 cDNA      1:GATGGGGTGCAGAGTGTTCCTGGCTTTTATACTGGGTGTTTGTCTACTGTACACTGCCA 60
      M G C R V F L A F I L G V C L L S H C Q
Sasa-DEA*0102 cDNA  $\Delta\alpha 2$  1:GATGGGGTGCAGAGTGTTCCTGGCTTTTATACTGGGTGTTTGTCTACTGTACACTGCCA 60

      alpha1 domain >
      S K H L L R F L T F C Q K N V P S D E E
Sasa-DEA*0101 cDNA pred  60:AAGCAAACATTTGCTGCGGTTTTTGACCTTCTGCCAAAAAACGTCCCCAGCGACGAAGA 119
      S K H L L R F L T F C Q K N V P S D E E
Sasa-DEA*0102 cDNA      61:AAGCAAACATTTGCTGCGGTTTTTGACCTTCTGCCAAAAAACGTCCCCAGCGACGAAGA 120
      S K H L L R F L T F C Q K N V P S D E E
Sasa-DEA*0102 cDNA  $\Delta\alpha 2$  61:AAGCAAACATTTGCTGCGGTTTTTGACCTTCTGCCAAAAAACGTCCCCAGCGACGAAGA 120
      F C Q K N V P S D E E
Sasa-DEA*0103 cDNA      1:                                     TTCTGCCAAAAAACGTCCCCAGCGACGAAGA 32
      F C Q K N V P S D E E
Sasa-DEA*0103 cDNA  $\Delta\alpha 2$  1:                                     TTCTGCCAAAAAACGTCCCCAGCGACGAAGA 32

      Y D V E F D G D E L F Y V D P I T Y Q V
Sasa-DEA*0101 cDNA pred 120:GTATGACGTGGAGTTTGATGGAGATGAGCTCTTCTACGTTGACCCCATACCTACCAGGT 179
      Y D V E F D G D E L F Y V D S I T Y Q V
Sasa-DEA*0102 cDNA      121:GTATGACGTGGAGTTTGATGGAGATGAGCTCTTCTACGTTGACTCCATTACCTACCAGGT 180
      Y D V E F D G D E L F Y V D S I T Y Q V
Sasa-DEA*0102 cDNA  $\Delta\alpha 2$  121:GTATGACGTGGAGTTTGATGGAGATGAGCTCTTCTACGTTGACTCCATTACCTACCAGGT 180
      Y D V E F D G D E L F Y V D S I T Y Q V
Sasa-DEA*0103 cDNA      33:GTATGACGTGGAGTTTGATGGAGATGAGCTCTTCTACGTTGACTCCATTACCTACCAGGT 92
      Y D V E F D G D E L F Y V D S I T Y Q V
Sasa-DEA*0103 cDNA  $\Delta\alpha 2$  33:GTATGACGTGGAGTTTGATGGAGATGAGCTCTTCTACGTTGACTCCATTACCTACCAGGT 92

      E R R L S E F A Q Q W T P D P G L P H E
Sasa-DEA*0101 cDNA pred 180:AGAGCGGCGTCTGTCTCAGAGTTCGCCAGCAGTGGACCCCTGACCCAGGACTGCCTCACGA 239
      E R R L S E F A Q Q W T P D P G L P H E
Sasa-DEA*0102 cDNA      181:AGAGCGGCGTCTGTCTCAGAGTTCGCCAGCAGTGGACCCCTGACCCAGGACTGCCTCACGA 240
      E R R L S E F A Q Q W T P D P G L P H E
Sasa-DEA*0102 cDNA  $\Delta\alpha 2$  181:AGAGCGGCGTCTGTCTCAGAGTTCGCCAGCAGTGGACCCCTGACCCAGGACTGCCTCACGA 240
      E R R L S E F A Q Q W T P D P G L P H E
Sasa-DEA*0103 cDNA      93:AGAGCGGCGTCTGTCTCAGAGTTCGCCAGCAGTGGACCCCTGACCCAGGACTGCCTCACGA 152
      E R R L S E F A Q Q W T P D P G L P H E
Sasa-DEA*0103 cDNA  $\Delta\alpha 2$  93:AGAGCGGCGTCTGTCTCAGAGTTCGCCAGCAGTGGACCCCTGACCCAGGACTGCCTCACGA 152

      V Y V S L G T C Q Y N I P R C I V G E K
Sasa-DEA*0101 cDNA pred 240:AGTGTACGTGTCCTCGGAACCTGCCAGTACAACATCCCCCGCTGCATTGTGGGAGAAAA 299
      V Y V S L G T C Q Y N I P R C I V G E K
Sasa-DEA*0102 cDNA      241:AGTGTACGTGTCCTCGGAACCTGCCAGTACAACATCCCCCGCTGCATTGTGGGAGAAAA 300
      V Y V S L G T C Q Y N I P R C I V G E K
Sasa-DEA*0102 cDNA  $\Delta\alpha 2$  241:AGTGTACGTGTCCTCGGAACCTGCCAGTACAACATCCCCCGCTGCATTGTGGGAGAAAA 300
      V Y V S L G T C Q Y N I P R C I V G E K
Sasa-DEA*0103 cDNA      153:AGTGTACGTGTCCTCGGAACCTGCCAGTACAACATCCCCCGCTGCATTGTGGGAGAAAA 212
      V Y V S L G T C Q Y N I P R C I V G E K
Sasa-DEA*0103 cDNA  $\Delta\alpha 2$  153:AGTGTACGTGTCCTCGGAACCTGCCAGTACAACATCCCCCGCTGCATTGTGGGAGAAAA 212

```

## alpha2 domain &gt;

```

          S P P E A I E V P T S H I Y S Q R E V E
Sasa-DEA*0101 cDNA pred 300:GAGCCCGCCAGAGGCAATAGAGGTGCCACCTCCCACATATACTCCCAGAGAGAGGTGGA 359
          S P P E A I E V P T S H I Y S Q R E V E
Sasa-DEA*0102 cDNA      301:GAGCCCGCCAGAGGCAATAGAGGTGCCACCTCCCACATATACTCCCAGAGAGAGGTGGA 360
          S P P E A I
Sasa-DEA*0102 cDNA Δα2 301:GAGCCCGCCAGAGGCAATAG----- 320
          S P P E A I E V P T S H I Y S Q R E V E
Sasa-DEA*0103 cDNA      213:GAGCCCGCCAGAGGCAATAGAGGTGCCACCTCCCACATATACTCCCAGAGAGAGGTGGA 272
          S P P E A I
Sasa-DEA*0103 cDNA Δα2 213:GAGCCCGCCAGAGGCAATAG----- 232

          L G V P N T L I C R V S D F H P T P V D
Sasa-DEA*0101 cDNA pred 360:GCTGGGGTCCCAACACACTCATCTGCCGGTTCAGTGATTTCCACCAACACCCGTGGA 419
          L G V P N T L I C R V S D F H P T P V D
Sasa-DEA*0102 cDNA      361:GCTGGGGTCCCAACACACTCATCTGCCGGTTCAGTGATTTCCACCAACACCCGTGGA 420
Sasa-DEA*0102 cDNA Δα2 324:----- 324
          L G V P N T L I C R V S D F H P T P V D
Sasa-DEA*0103 cDNA      273:GCTGGGGTCCCAACACACTCATCTGCCGGTTCAGTGATTTCCACCAACACCCGTGGA 332
Sasa-DEA*0103 cDNA Δα2 232:----- 232

          V T W T R N E Q P V A E R T I I Q T Q Y
Sasa-DEA*0101 cDNA pred 420:TGTGACTTGGACCAGGAACGAGCAGCCGGTGGCAGAGAGGACCATCATTCAGACCCAGTA 479
          V T W T R N E Q P V A E R T I I Q T Q Y
Sasa-DEA*0102 cDNA      421:TGTGACTTGGACCAGGAACGAGCAGCCGGTGGCAGAGAGGACCATCATTCAGACCCAGTA 480
Sasa-DEA*0102 cDNA Δα2 320:----- 320
          V T W T R N E Q P V A E R T I I Q T Q Y
Sasa-DEA*0103 cDNA      333:TGTGACTTGGACCAGGAACGAGCAGCCGGTGGCAGAGAGGACCATCATTCAGACCCAGTA 392
Sasa-DEA*0103 cDNA Δα2 232:----- 232

          Y S N E D F S F R I F S Y L S I T P Q E
Sasa-DEA*0101 cDNA pred 480:CTACTCCAATGAAGACTTCAGCTTCAGGATCTTCTCCTACCTGAGCATCACACCTCAGGA 539
          Y S N E D F S F R I F S Y L S I T P Q E
Sasa-DEA*0102 cDNA      481:CTACTCCAATGAAGACTTCAGCTTCAGGATCTTCTCCTACCTGAGCATCACACCTCAGGA 540
Sasa-DEA*0102 cDNA Δα2 320:----- 320
          Y S N E D F S F R I F S Y L S I T P Q E
Sasa-DEA*0103 cDNA      393:CTACTCCAATGAAGACTTCAGCTTCAGGATCTTCTCCTACCTGAGCATCACACCTCAGGA 452
Sasa-DEA*0103 cDNA Δα2 232:----- 232

          G D I Y S C S V G H V S L Q E P L T R I
Sasa-DEA*0101 cDNA pred 540:GGGGGACATCTACTCCTGTAGTGTGGGTACAGTCAGCCTGCAGGAACCCCTCACCAGGAT 599
          G D I Y S C S V G H V S L Q E P L T R I
Sasa-DEA*0102 cDNA      541:GGGGGACATCTACTCCTGTAGTGTGGGTACAGTCAGCCTGCAGGAACCCCTCACCAGGAT 600
Sasa-DEA*0102 cDNA Δα2 320:----- 320
          G D I Y S C S V G H V S L Q E P L T R I
Sasa-DEA*0103 cDNA      453:GGGGGACATCTACTCCTGTAGTGTGGGTACAGTCAGCCTGCAGGAACCCCTCACCAGGAT 512
Sasa-DEA*0103 cDNA Δα2 236:----- 236

Linker/TM/CY domains >
          W E V E V H T D H Q T V E T A V C V G G
Sasa-DEA*0101 cDNA pred 600:CTGGGAGGTTGAAGTGCACACGGACCACCAGACTGTGGAGACAGCAGTGTGTGTTGGAGG 659
          W E V E V H T D H Q T V E T A V C V G G
Sasa-DEA*0102 cDNA      601:CTGGGAGGTTGAAGTGCACACGGACCACCAGACTGTGGAGACAGCAGTGTGTGTTGGAGG 660
          E V E V H T D H Q T V E T A V C V G G
Sasa-DEA*0102 cDNA Δα2 321:-----AGGTTGAAGTGCACACGGACCACCAGACTGTGGAGACAGCAGTGTGTGTTGGAGG 375
          W E V E V H T D H Q T V E T A V C V G G
Sasa-DEA*0103 cDNA      513:CTGGGAGGTTGAAGTGCACACGGACCACCAGACTGTGGAGACAGCAGTGTGTGTTGGAGG 572
          E V E V H T D H Q T V E T A V C V G G
Sasa-DEA*0103 cDNA Δα2 233:-----AGGTTGAAGTGCACACGGACCACCAGACTGTGGAGACAGCAGTGTGTGTTGGAGG 287

```

```

          V T L G V V G V A T G V W F I K K A K R
Sasa-DEA*0101 cDNA pred 660:TGTGACTCTAGGAGTGGTTGGAGTAGCAACAGGAGTCTGGTTTATCAAAAAAGCCAAGAG 719
          V T L G V V G V A T G V W F I K K A K R
Sasa-DEA*0102 cDNA      661:TGTGACTCTAGGAGTGGTGGGAGTAGCAACAGGAGTCTGGTTTATCAAAAAAGCCAAGAG 720
          V T L G V V G V A T G V W F I K K A K R
Sasa-DEA*0102 cDNA Δα2 376:TGTGACTCTAGGAGTGGTGGGAGTAGCAACAGGAGTCTGGTTTATCAAAAAAGCCAAGAG 435
          V T L G V V G V A T G V W F I K K A K R
Sasa-DEA*0103 cDNA      573:TGTGACTCTAGGAGTGGTTGGAGTAGCAACAGGAGTCTGGTTTATCAAAAAAGCCAAGAG 632
          V T L G V V G V A T G V W F I K K A K R
Sasa-DEA*0103 cDNA Δα2 288:TGTGACTCTAGGAGTGGTTGGAGTAGCAACAGGAGTCTGGTTTATCAAAAAAGCCAAGAG 347

          3' UTR >
          S G W A L R T *
Sasa-DEA*0101 cDNA pred 720:GTCTGGTTGGGCCTTAAGAACATAG          744
          S G W A L R T *
Sasa-DEA*0102 cDNA      721:GTCTGGTTGGGCCTTAAGAACATAGGCAACAATCAGCTATCAGCGATACAGCAAGGGCTC 780
          S G W A L R T *
Sasa-DEA*0102 cDNA Δα2 436:GTCTGGTTGGGCCTTAAGAACATAGGCAACAATCAGCTATCAGCGATACAGCAAGGGCTC 495
          S G W A L R T *
Sasa-DEA*0103 cDNA      633:GTCTGGTTGGGCCTTAAGAACATAGGCAACAATCAGCTATCAGCGATACAGCAAGGGCTC 692
          S G W A L R T *
Sasa-DEA*0103 cDNA Δα2 348:GTCTGGTTGGGCCTTAAGAACATAGGCAACAATCAGCTATCAGCGATACAGCAAGGGCTC 407

Sasa-DEA*0102 cDNA      781:CATGCAACAATACCAAGGACAATTCTCATATTTAGCAAC          819
Sasa-DEA*0102 cDNA Δα2 496:CATGCAACAATACCAAGGACAATTCTCATATTTAGCAAC          534
Sasa-DEA*0103 cDNA      693:CATGCAACAATACCAAGGACAATTATCATATTTAGCAAC          731
Sasa-DEA*0103 cDNA Δα2 408:CATGCAACAATACCAAGGACAATTATCATATTTAGCAAC          446

```

### **Text S2-3C. Sequence alignment of Atlantic salmon *DEB* alleles**

The *DEB\*0101* cDNA pred is a sequence predicted from our Ssa1\_scf\_10 genomic sequence (Table TS2-1), which was corrected (1 nt was deleted) at the site of the downward arrowhead to be in frame and consistent with the detected cDNA sequences. In six salmon individuals from a Canadian fish farm, for which genomic fragments between arrows were amplified and sequenced, only sequences matching *Sasa-DEB\*0101* were found.

```

          Leader >
          M A L C W V Y W M A G L S V I Q T W A T
Sasa-DEB*0101 cDNA pred  1:ATGGCTCTCTGCTGGGTCTATTGGATGGCTGGACTTTCTGTCAATTCAGACCTGGGCAACA 60
          V Y W M A G L S V I Q T W A T
Sasa-DEB*0102 cDNA      1:-----GTCTATTGGATGGCTGGACTTTCTGTCAATTCAGACCTGGGCAACA 45

          beta1 domain >
          P A G G Y Q F Q G I V D C E Y D D T I D
Sasa-DEB*0101 cDNA pred  61:CCAGCAGGTGGGTACCAGTTCAGGGGATAGTTGACTGTGAATATGATGACACCATTGAC 120
          P A G G Y Q F Q G I V D C E Y D D T I D
Sasa-DEB*0102 cDNA      46:CCAGCAGGTGGGTACCAGTTCAGGGGATAGTTGACTGTGAATATGATGACACCATTGAC 105

          N M I Y F V K N I F N Q K L T T I Y D S
Sasa-DEB*0101 cDNA pred 121:AATATGATCTACTTTGTGAAAAACATATTCACCAAAAAATTGACCACCATCTATGACTCC 180
          N M I Y F V K N I F D Q K L T T I Y D S
Sasa-DEB*0102 cDNA      106:AATATGATCTACTTTGTGAAAAACATATTCGACCAAAAAATTGACCACCATCTATGACTCC 165

          R V Q K Y V G F G E F G I R N A D R Y N
Sasa-DEB*0101 cDNA pred 181:AGGGTTCAGAAGTATGTGGGTTTTGGGGAGTTGGCATAACGCAATGCAGATCGCTACAAC 240
          R V Q K Y V G F G E F G I R N A D R Y N
Sasa-DEB*0102 cDNA      166:AGGGTTCAGAAGTATGTGGGTTTTGGGGAGTTGGCATAACGCAATGCAGATCGCTACAAC 225

```

←

S Q A W K M A I R K A E V E T I C R Y S

Sasa-DEB\*0101 cDNA pred 241:AGCCAAGCTTGGAAAATGGCTATAAGGAAAGCAGAAGTGGAGACTATTTGCCGATACAGT 300

S Q A W K M A I R K A E V E T I C R Y S

Sasa-DEB\*0102 cDNA 226:AGCCAAGCTTGGAAAATGGCTATAAGGAAAGCAGAAGTGGAGACTATTTGCCGATACAGT 285

beta2 domain >

A I F F K L S T L E R I V P P I V K V R

Sasa-DEB\*0101 cDNA pred 301:GCAATATTCTTCAAACCTGAGCACTTTGGAAAGAATAGTGCCTCCCATTGTCAAAGTCCGC 360

A I F F K L S T L E R I V P P I V K V R

Sasa-DEB\*0102 cDNA 286:GCAATATTCTTCAAACCTGAGCACTTTGGAAAGAATAGTGCCTCCCATTGTCAAAGTCCGC 345

L T K P S R Y G E L S M L E C S V L G F

Sasa-DEB\*0101 cDNA pred 361:CTGACCAAGCCCTCTCGCTACGGGGAGCTGTCCATGCTGGAGTGCAGCGTTCTAGGCTTC 420

L T K P S R Y G E L S M L E C S V L G F

Sasa-DEB\*0102 cDNA 346:CTGACCAAGCCCTCTCGCTACGGGGAGCTGTCCATGCTGGAGTGCAGCGTTCTAGGCTTC 405

Y P Q E V R V S W L R D G R E T T T A V

Sasa-DEB\*0101 cDNA pred 421:TACCCTCAGGAGGTGAGGGTGTAGCTGGCTGAGAGACGGGCGGGAGACCACCACAGCCGTG 480

Y P Q E V R V S W L R D G I E T T T A V

Sasa-DEB\*0102 cDNA 406:TACCCTCAGGAGGTGAGGGTGTAGCTGGCTGAGAGACGGGCTGGAGACCACCACAGCCGTG 465

T S T D T L A N G D W S Y Q L H S Y L E

Sasa-DEB\*0101 cDNA pred 481:ACCTCCACTGACACACTGGCTAACGGGGACTGGAGCTACCAGCTCCACTCCTACCTAGAG 540

T S T D T L A N G D W S Y Q L H S Y L E

Sasa-DEB\*0102 cDNA 466:ACCTCCACTGACACACTGGCTAACGGGGACTGGAGCTACCAGCTCCACTCCTACCTAGAG 525

F R P Q R G E S V S C M V E H P S L D E

Sasa-DEB\*0101 cDNA pred 541:TTCAGGCCTCAGAGAGGGGAGAGTGTAAAGCTGCATGGTTGAGCACCCAGCCTAGATGAA 600

F R P Q R G E S V S C M V E H P S L D E

Sasa-DEB\*0102 cDNA 526:TTCAGGCCTCAGAGAGGGGAGAGTGTAAAGCTGCATGGTTGAGCACCCAGCCTAGATGAA 585

Linker/TM/CY domains >

P L E V V W D T S G L D A K W F K M A I ▽

Sasa-DEB\*0101 cDNA pred 601:CCACTGGAGGTGGTCTGGGATACCTCAGGCCTGGATGCTAAATGGTTTAAATGGCAATA 660

P L E V V W D T S G L D A K W F K M A I

Sasa-DEB\*0102 cDNA 586:CCACTGGAGGTGGTCTGGGATACCTCAGGCCTGGATGCTAAATGGTTTAAATGGCAATA 645

G V C S L F I G V A M A I G G G V Y Y W

Sasa-DEB\*0101 cDNA pred 661:GGGGTGTGTTCCCTTTTCATTGGTGTAGCCATGGCTATTGGAGGAGGAGTTTACTACTGG 720

G V C S L F I G V A M A I G G G V Y Y W

Sasa-DEB\*0102 cDNA 646:GGGGTGTGTTCCCTTTTCATTGGTGTAGCCATGGCTATTGGAGGAGGAGTTTACTACTGG 705

3' UTR >

W K N R S G F R R V N R \*

Sasa-DEB\*0101 cDNA pred 721:TGGAAGAACAGGTCAGGCTTTAGGCGTGTGAATAGATAA 759

W K N R S G F R R V N R \*

Sasa-DEB\*0102 cDNA 706:TGGAAGAACAGGTCAGGCTTTAGGCGTGTGAATAGATAAGTCATTGGCAGCAGAGAACCG 765

GAAAGGAAAGCGGCCAAAGGAGGAATTGGCTTTGGGGGTGAC

Sasa-DEB\*0102 cDNA 766: 808

**Table TS2-4. Genes situated in Atlantic salmon *DEA/DEB* (Ssal\_scf\_10) and *DFA $\psi$ /DFB $\psi$*  (Ssal\_scf\_137) genomic regions.** Analyzed stretches of confirmed 411 and 428 kb regions of Ssal\_scf\_10 and Ssal\_scf\_137, respectively.

| Gene                                                    | Short name<br>Ssa1_scf-10<br>(Ssa1-scf-137) | Ssal_scf_10                | Ssal_scf_137               |
|---------------------------------------------------------|---------------------------------------------|----------------------------|----------------------------|
| Inactive phospholipase C-like protein 2                 | PLCL2                                       | 1.602 - 21.181             | 392.324 - 427.152          |
| Inactive phospholipase C-like protein 2                 | PLCL2                                       | 51.359 - 51.646 (pseudo)   | None                       |
| Cysteine-rich secretory protein-like                    | CRISP_L                                     | 58.675 - 62.766            | None                       |
| Raftilin -like                                          | RFTN                                        | 100.679 - 144.624 (pseudo) | None                       |
| Vitelline membrane outer layer protein 1                | VMO1                                        | 153.552 - 157.956          | None                       |
| MHCIIB                                                  | DEB (DFB)                                   | 158.800 - 160.528          | 258.882 - 259.877 (pseudo) |
| MHCIIA                                                  | DEA (DFA)                                   | 161.271 - 163.612          | 256.622 - 258.699 (pseudo) |
| Bromodomain containing 2                                | BRD2                                        | 171.995 - 177.278 (pseudo) | 246.571 - 251.554          |
| Transport-associated protein                            | TAP1                                        | 187.837 - 191.886 (pseudo) | 230.485 - 237.656          |
| NOTCH-like                                              | NOTCH_L                                     | 194.568 - 200.065          | 224.757 - 229.063          |
| Pre-B-cell leukemia homeobox 2                          | PBX2                                        | 200.909 - 206.709          | 218.364 - 223.704          |
| G-protein signaling modulator 2-like                    | GPSM2_L                                     | 212.558 - 214.789          | 209.865 - 212.282          |
| Deoxyribonuclease II-like                               | DNASE2_L                                    | 219.719 - 224.792          | 199.370 - 212.282          |
| Ral guanine nucleotide dissociation stimulator-like 2   | RGL2                                        | 227.464 - 240.837          | 184.391 - 196.696          |
| Ral guanine nucleotide dissociation stimulator-like 2   | RGL2                                        | None                       | 177.522 - 177.716 (pseudo) |
| PHD finger protein 1                                    | PHF1                                        | 253.681 - 258.313          | 156.501 - 168.470          |
| Synaptic Ras GTPase activating protein 1                | SYNGAP1                                     | 281.804 - 292.762 (pseudo) | 78.587 - 107.694           |
| Synaptic Ras GTPase activating protein 1                | SYNGAP1                                     | 325.393 - 352.011          | 64.244 - 74.707 (pseudo)   |
| Smg-5 homolog, nonsense mediated mRNA decay factor like | SMG5_L                                      | 381.349 - 409.641          | 4.075 - 32.512             |

Pseudo= obvious pseudogenes.



ATACACAGACGAACATTGCCGTGTGTTGATTTGAGTCAGGTTGCAGTCCACAACATAAGAGCAACAGCTGAGGGTCTGG  
 CCGTTAAGGTGCTCGGTAACGGGAGCTTGGTATACTACTAATAGCTTCACCAGACTCAGCTGATGGCACACACACACACA  
 CACACACACACACACACACAGCTGAAACGGTCAGACTGAGCATGCTCAGATCTATCACGGCGCTCTACAGCTTGGGT  
 CGGTTCCAGCCCTGTTGGTGTGTTTCCATGGCAACACCACATACATATGAGATATACGGTGGTGGTGGAT  
 GTTGATGATGATTTCTGAGGAGGTCTGTGATATTGGCACTCCAGCAGTTAGCACATACTGACCTAGATGAAGAGTCGAGA  
 CTGAGAAAACGGCCAAAGAAATGTTCAAAAATTAGGCCCTGGCTGAGGCTAGTATTGTATCTCTTACAGAGAATGCGTA  
 GGGCATAGATTTTTTTTTTAAATTGGACCATACACTGTGCTAATAATCTGTTACTCCCAGCCTTTTTGATTTTGTTCCT  
 GTGAAACATCGTAATGATTCCGGAATGATTATCCCCACCCTCAGGTGCTGTGCTGCTGTAACACTACAGTCACTGTTGTTG  
 TACTCATGAAGCATGACTGTGCTGGACGCACACACACACACAACCAACTCTCAGCAGGGGTGCTTAGCAACGCAG  
 TGTAGAGTTGGGGGTGTGTGGCGGGGCACTAATTCGTCACTTGTAGCAAGCCCTTCAAACCTCAATTCGGCAAGCTT  
 ATGCTCGCTGACAGAGACTGTATGAAGCCACCAAGTCTCAGTCACCTTTGACAGTCCATAACCGAGCGGCAGGTAGG  
 AAAGGGGTTTGGCGTGGCCAATGACAATACATCAGGGGTAAGCTTCTTTAGATGGTGTAAATTTTTTCCCTCGGATACCT  
 GGAGCTCAATAACTGTCAGTACAATGAACTTGGACCACAGTGCACAGGAAATATTCATGAAACCGTTTCCCAA  
 ACTGTATTGTAGCCGAGGCTAAATCCCTGTTGGTATCAAACGGTGGCATACTGTACATATGTTATAAAGATGATCTGC  
 CTGTTTACTAGCTTTATTAATAATGGATTGAAATCGCAAAAGCAACACATTGATGGATTGTCCCAATCCCTCTGAATAG  
 ATGATGCATTTGACCCGTGAGAATATCACCTACTGTATTTAATGGCCATAGGTCATTACTGTAATGGGGTTTTCCATTC  
 ATCTTATGTTCCACATTTTAGCTTGTTTCTAGGCACTTTGTAAAAGTTAACCTAGTCTGTTATAAGCATTACT  
 CTGTCCAGACTAGGTGCTTTTCTGTTAGCTATTGAGTGTCCCAGATGTTTGGTACCTGTGTGTAATGCAAGTATTG  
 CATTTGATCTGTGCACTTTCAGACAGTAAGTAGTGAGCTTTGTTTATTGTTACCCAGGGGGTCTTTTGGGCGGGTGTCT  
 TCTCTGAGTGGTTATGATGGATTACACAGAACTCCAGTAGCTGTTGCTGGAATGTTCTGCTCACTGTCCGAGGGAATAC  
 AGTTTGTATTGACCAATTTTCCACTCACACTCAAAATACGTATAGATGAAATTATAACATGAATTTCTCGTTGCTTAGTT  
 TACCATTTGCTGTGCTTATTTTGCAAAATGTTGGTGGTTGAATCCAGCCAGTAGATTTGATATGGTGCCTGGTAGTAA  
 CCAAAGGCCCTTGGCGAGCCATGTGGAAGTCCATGTTAACTGTTTAGTTGTGTCATGTGTGCCGATTAATAATAAAA  
 TAATACAAATTCATGAAGCAATTTCCCTACCTTCCAAGCTATCGTTTTGGCTAACTGAGTGGCCTAGTAGTACAATTTGA  
 AAGAAATTTCTGTATTTGAGTACTCATGAAATAATTGAGTGTAGCGTGAACATGTTAGCGTGAACAGTGTGTAAGGC  
 AAAAAAAGTTTGGCGTATGCTGGTGTTCAGATACACAATTGAAAACCAACTTAAAACATGTCCAATGCACTTCATAT  
 ACTCTCAAAGAACACACACCTTACCCGAGTTTGAATGTGAGTGTATAAATGTAACATAATAAATAGTCGCATTTGT  
 GAATTTGAGTACTTGTATTTCGAGTAATTAGTAAACGCAAACTTTAAAATCGAGTACTGTGTACGTGTGCCATCCCTAGTT  
 ACTTTCAAGTCTTATTTTATAGACATTTCAAAGACTAGAGAAAAAATACCATAACATTTGACAAAAGTGTGATGGGTTTCAT  
 CACTTTGAAGAGGAATGTTTTCAGACTATGGACACAATACTGTAATACTATAGATCTTACGAGCACCAAAAGTAGC  
 CCAATTTCCGATAGGCCCTTCTGCTTACAGTAAGAGATGTTTTTGTGTTCTTTTCCAGCACCCTTTTAGGCAAGTTTCC  
 ATCTTAACTCTCAGACTACCAACGGCTAATGTCTCGGGCAGCAGCTTGAAGGCAGGTGATGTTGGTGTGTGATGAATAC  
 TAAGAAGAGGAGATGACGGCAAGAAGCCATTGATTTGCGACACACACCTCAGTTAAAGAAGACACTCGTCCACCCCTTG  
 ATGAGCCAAGACAACAGACTATGAATATTTTATGTGTCATCCATCTGAAAAGCAATAAATCCAGCCCCCGGAACGATGG  
 CCTGTTTTTCTCACTCGGCCTCAAGCAAGTTACTCCATGATGAATGAAACATAAAACAATGCTTAGATGGGAAACGTT  
 GCTGAAATCGCGTGCATTAGATTAAGACAGACGCTCAAATGATCCCGTCACTGAATATGATTTTATTTGTACTGTAGTA  
 AATCTACAGGTCAAATTTTATGCTGCTTTTAAAGCACACAATTTGGTTTTTCAGAGGTTTGCACCTTAGGCTCTTTCTGG  
 AAAAAACCACTTGTGCGAGTTCCCTCATAATGGGGGAAGGAAGGAGAGGGTGAACATTTCTGAAAGATTCTCAAGCCAAG  
 ACTCTCCAACCTTGGAGTGAGATCTCTGCCAGCGTGTCCATTGATGAGCTGCCAATCACCCATCAAGGCTCCAAGCT  
 CCTCCGATCCCCCAGCCCCAGAGCAGAATGGATTAACTGCCCCCTGTTCAAGTCAAGTCAACACATTATGAGGGGCC  
 AGAAGGCTATTCTCAGAGACTCTCACCAGAGGAGCGGGATAAACAGTGTAAAGCGCACAGATATAATAAAATTGCAAG  
 AGCACACAAGCTGCAATATTCATATCAAAGTGCAAAACGCAAGATTCTAACAATGAGATCAATAATTTTCCAATCAATTTG  
 TCAGACAAAAAAGGAGGATATTTTATCCATTTCTGGTAAATATTCCCTTTCAATTGTTATTAGATGGGCTTG  
 ATCTCATTCTGCAGCTTGTGAGCGTTCGCTTCCCTGTTTGGAAACCGGGTATAAAAAAGAGACAGCAGCTTGGCAGTC  
 TTTGATGTTGTTCTGTTTCAAGACCTGGGTGTTTACCACCTCAGCTGCAACCCTCTAATTAGAGGAGCAGCAAGGCCGAC  
 GCCGTGAGAATCATAAAAACCAGGCAGAACCAAGCAGCGTTTCAAAGCAGCCGGGTACAGAAATGAGCATGAATCAA  
 ATGTTAATAACTTATGTAACAGGGCCGGCATAATCAGTCCATATTTTTTGTAGCTGTGCTCTCTATGGCATACTTCAG  
 ACAGGGGGGTGATTTGATATGAAAGGAAGATGGGAAGATCTGAGGGACAGTGGATCTTTGAGAGAAATGGGCTTTTCATG  
 CTAACATCGCTCTTAGTCACTCTTTCCCTCTTACCTGCTTTCTGGGTTAGCAGTATTCGGTCTGAGGCTCCCTCA  
 GAGTTCTCCAGCAGCCCTTGGTCTGGATCATCTGCAGGAGAGGAAAGCAGACAGTCCAGTTCACCTCTAGGCTTTT  
 CCCTTTACAGCAGCTTGGCATCTGCGGTAGTGAGCAATCTTCAATTTGTTTTGTTTTGAGAGTATGTAATTCAGTGGCG  
 GGGAGAAAGGAGCCTAGGCCCTTATTACAGAGATAGAGGGCAAGCAGCGGGAGTTGTGCTGAGGCACGGTAAAAACAG  
 AGGGAGGAGAGTGTATTCGTGTATGTTATTGAAATTTGCAAGACAACCTAGGGCATTGCATGTTACCATTATAAAATATGA  
 CGTCCAGTCTGTTTCAGAGTTGGTCTGAAACATGTGATTTCAAGAGTAGGTTATTTATGTTTATTACAGCAATCCGTT  
 GTAATAGGAGAGGTTCTGTTTCAAGGCGTAACACAGCCTTATCTGTGGCATCACAGCTGGATAGCGGACCCTAAATTT  
 AGCTCCCTGTCTTAATGAGTGCACACTCTTCTGCCCTCCATGACTGTGTTGAAACTGTCATGGTGGCTCTGGTACATA  
 TAGAGGCCCAATTTGCACTTCTAATGCTGGCCAAAAATAAAACACCCCAAAATACATCCCTGGTGCATCGGGGGTATTT  
 CGGGAGGTTAATGACGCGTGTGTTTACTGTGATGGATCCTGGTAAATACCCACTGCACGACCCAGGAGACGTACACACGG  
 ATACGACCATCTGGATCTTTCTCCCTTATTACCGTCTCTCGGAGTGAATTAATACGATCATCTGAAGGAAATGATATAA  
 CATGTTAAATTAGAATAGGCTTCTTAAATGCGATTCTGGGGCGAGATGACACAATTACGGCAGCCTTCCGTTTCAANNNNN  
 NNNNNNNNNNNNNNNNNNNNNNNNNNNNNNNNNNNNNNNNNNNNNNNNNNNNNNNNNNNNNNNNNNNNNNNNNNNNN  
 NNNNNNNNNNNNNNNNNNNNNNNNNNNNNNNNNNNNNNNNNNNNNNNNNNNNNNNNNNNNNNNNNNNNNNNNNNNNN  
 NNNNNNNNNNNNNNNNNNNNNNNNNNNNNNNNNNNNNNNNNNNNNNNNNNNNNNNNNNNNNNNNNNNNNNNNNNNNN  
 NNNNNNNNNNNNNNNNNNNNNNNNNNNNNNNNNNNNNNNNNNNNNNNNNNNNNNNNNNNNNNNNNNNNNNNNNNNNN  
 NNNNNNNNNNNNNNNNNNNNNNNNNNNNNNNNNNNNNNNNNNNNNNNNNNNNNNNNNNNNNNNNNNNNNNNNNNNNN  
 NNNNNNNNNNNNNNNNNNNNNNNNNNNNNNNNNNNNNNNNNNNNNNNNNNNNNNNNNNNNNNNNNNNNNNNNNNNNN  
 TGGGCTGGGCGTTCCTTACAGGCAAGTAAATGGAGAAGTCAAACAGTACTCCAGCCCTTACACCCAAGTGGGGATA  
 TTAGGAAATAAACCAATTAGAATATGTTCTTTGGTGTATACATCAATTTGAATATTAGGAGTGAATTTATACAATTTTCA  
 AAGCCCTGACAATTAACAATATGGCTATATATTTGAGGTGGGCATCAAACCTAGTTTTATGATGGCAATCCAGAGCATT  
 CCTACAGTCTGTGATGAGTGAACACGTCGTGACTAAGCTGAGGGAGGCGTGTGGGGTGTGTTGTGACAGTCCACAGCTGC  
 AGTAAACAGGGCTGGAGGCTGTCAGGCACACTGATTACTTTACTAATGGGTGAAGAAATTACAGCCTTGGGTGACAGACAC



AGCAACACGGGGAGATATTTATAGTGGATTGAGAGGTAAGTGGCTGAACTCAACGCTGGCTTTGCTCGTAAAGACTAGC  
 TGTGGTGATTTGTGTATTTAGTGGTGTACTGGGAGTGTTTTACAAGGCTTCAAAATGGTAATAGTTATCATTAACAAAC  
 TAGTACTTTGTGACACATTTGTTACTTCCCTACATTTTTCTAGAAAAATCGACACAATACATTTACAACACGAAGAACAG  
 CACATTCAAATTAAGATAATTTCTGCAGAGGAGCAGTGTGATGATCCTGGAAAGAGTCCACATTTACTTTTCCCTCTGCAAA  
 TAAAAAAGTAATGAATAGAAAAACAGACAACCCCATAGTAGAATTGTGTATATCTATTTACCTAGTCGGCTTGACGTT  
 GTGTGTTCTATGAGAGAAATGTTTCATCTCAAAGCGCATTCAGTTATGAGTGCCACAGGGACGGAAACGTGCAATCTGAC  
 AAGCAGTCAATGCACAACAATTCCTAATTCATAGTGGGGGAAAATCAAAGTTTTAAATGGCATTGTTAAAAAGAGGTG  
 GATCCCGGCTTTCCATTCATACTTATTTATTTCTGAAATGCACCATTTTAAACCCAGAGTTTTTAGCAGCGGCATGGTTG  
 AGCAGGATACCGCTCCGCAATTCACCTCGAGTGCCTGGGAGAGTGGACCAAACGTAAACACGGGTCAATTTAGGGTAAC  
 TTGGAGTGACCTAAATTTGTGATGAGACAGATTACATACAGTTGAAGTCAGAAGTTTACATACACTTATGTTGGAGTCAT  
 AAAACTCAATTTTTCAACCACTCCACAAATTTCTGTTAAACTATAGTCTGGCAAGTCGGTTAGGACATCTACTTTGTGC  
 ATGACAAGTAATGTTTCCAACAATGTTTACAGACAGATTATTTCACTTATAAATTCAGTGTATCACAATTCAGTGGGTG  
 AGAAGTTCACACACTGAGTTGACTGTGCCTTTAAACAGCTTGGAAAATTCAGAAAATGATGTCATTTAGAAGCTTCTGA  
 TAGGCTAATTGACATCATTTGAGTCAATTGGAGGTGTACCTGTGGATGCATTTCAAGGCTACCTTCAAACCTCAGTGCCT  
 CTTTGCTTGACATCATGTAATAATCCAAAGAAAATCAGCCAAAGACCTCAGAAAAAATAATGTTAGACCTCTACAAGTCT  
 GGTTCATCTTTGGGAGCAATTTCCAACACCTGAAGGTACCAGTTCATCTGTACAAAATAAGTACCCAAGTATAAGCA  
 CCATGGGACCACGAGCAGTCAACCGCTCAGGAAGGAGATGCGTTCCTCTAGACATGAACGTACTTTGGTGGCAGAA  
 AAATGCAAAATCAATCCAGAACAAACAAGGACCTTGTGAAGATGCTGGAGGAAACAGGTAGAAGGTTATCTATATCC  
 ACAGTAAAATGAGTCTATGCCGACATAACCTGAAAGGCCACTCAGTAAAGGAAGAACTGCTCCAAAACCTGCCATAAAAA  
 GCCAGACGGTTTGAACCTGCACATGGGACAAAGATAGTACTTTTTGTAGAAAATGTCCACTGGTCTGATGAAACAAAAAT  
 ATAACCTGTTTAGCCATAATGACCATCGTTATGTTTGGAGGAAAAAGGGGGAGACTTGCAGCCGAAGAACCATCCCAA  
 CCGTGAAGCAGGGGGTGGCAGCATCATGTTGTAGGGGCTCTTTCCCTCCAGGAGGGACTGGTGCATTCACAAAATAGAT  
 GGATCATGAGGAGGAAGACTATGTGATATATTGAAGCAACATCTCAAGACATCAGTCAGGAAGTTAAAGCTTGGTTAC  
 AAATGGCTCTTCCAATGGACAATGACCCCAAGCATACTTCCAAAGTTGTGGCAATTAAGGACAACAAAGCTCAAGGTATT  
 GGAGTGGCCATCACAAGCCCTGACCTCAATCCTATAGAACATTTGTGGCTGAACTGAAAAATTTGTGTGCGAGCAAGGA  
 GGCCTACAAACCTGACTCAGTTACACCAGCTCTGTGAGGAGGAATGGCTAAAATCCACCGTACTTGTGAAAGGCTACCC  
 AAAAGCTTTGACCTAAGTTAAACAATTTAAAGGCAATGCTACCAATACTAAGTGTATGTAACCTTCTGACCCACT  
 AGGAATGTGATGACAGAAATAAAGCTGAAATAAATCATTCTCTACTATTATTCTGACATTTACATTTCTAAAATAAAG  
 TGGTGATCCCTAAGTACATAAGCAGGGAATATTACTAGGATTAATGTGAGAAAATTTGTGAAAAACAGTTTAAATGTAT  
 TTGGCTAAGGTTTATGTAACCTTATGACTTCAACTGATTTGGTTGAGCAAGAATAGTGGCAACCAGGAAAATTTGGG  
 GGAATAAAATGTAACATGAAGTGGTTTCTGTGAGAAGCACAGGCAGGGGGCATGTGAGCGTTATTGTAATTTATTCATTTT  
 GGAGTAGAATGTCTTTTTAAAAGTCAACCAACTGAGCTTCTCAGTCTTCTACATAAAATGTACACGACTTGATCTTC  
 TTTCACTTCATATTTTCATCAGAATGCTGAGGACACACAAGAGTCAATGTCTAACACTTAACTCATGATCCAAACTTCA  
 CTGACGCCTGCCCATGACTCTCAATGAGAGACACTTTTGGAGTAAAGTTACACTACTCATCCGTTGGCAGGTTAGTTTGCA  
 CATTACCTTCATGCTCTGTGTGGGGTCTTAAAGTCAAGAGAATGAGACATTATGAATACATTAGGTAAATTACATGCAA  
 TGCTATGCTAATGTGTACTAATGCAGTCTGTAGCCTTTGACCTGTGTTCTACAGTGAATAATAAGCTTCAACATACTT  
 CTCAGGATTTATGCTTTGTGCAGCAGCACACTGCTGCAACATGTCTGCACAGAAAACAGCTGGTGTCAAATATAAAATATCA  
 AAGTATGAATATTTTAAAGCGTATTCAATACGTATTGAGGAAATATGCTAGATTTGAGGATGAAATATCAGATGCTCC  
 TAAAGTGTTTTTCCATGGCCACGTTGGATAACCTAGCAGAGCTTTTCAATGTTGTTTTTATCTTACTGGCTGTATTGTAGCA  
 AATACAGTAGATAAGTAATGAAATATTCAAAATGGGGGACAAAGGTAATCCTATAACACTCTTGTATTATTAAGGTACAT  
 TGATTACGGTGAGGTGAAGCGTAATAGGTCTGTATTGAAATAGCCTCAATGACACATTTATAAACTGGGTGTTTCCAGC  
 CCTGAATGCTGATTTGGCTGACAGCCGTGGTATATGAGACCGTATACCATGGGTATGACAAAACAGTTATTTTTGCTGTTC  
 TAATTACGTTGGTAACAGTTTATAATAGCAATAAGGCACCTCGGGAGTTTGTGGTATATGGCCAGTATACCACGGCTAA  
 GGTCTGTATCCAGGACTCTGCGATGTGTCGTGCAATAGAACAGCCCATAGCCGTTGTTATATTGGCCATATACAAAGCC  
 CCTCATGCCTTATTTGGTTAATTATATAAATTCAGTCCATTGTCAACATTGATTAAATGACTTCATAAAAAACAACCCACCC  
 CTGCCCTACTACCTAACCCCTTACCCTCATGTTACCATTCAAATCCACTAAACCCCTCTCTTGACTTGATTAGAGTCA  
 AACTCATTTTTCTAGTGTTTTTGAGGTGTTTTTACAACCAGCACATTTAGTAGTGGTCTAAAATCCCAGATTTTCAAGTCCCT  
 GGTCTTAAAAAAGAACGTCCTCTATCAACTAACCTTATAAAAAAAGAAAAAATAACCAAAACATGATACTGTTCAAAC  
 AAAAGTCTCTGACTCACCATGTCATAGGTGGTGACCACTTCTCAGGACATCTGGTAGCTGGCCCTGGGGCTCCAT  
 GGTGGGGTACTGGTCTTTGAGGTTGAACACAGGAGGGGGTGGTTGTGAGCCCTGACGGCCGAGGAGGAGGAGGAGGAGG  
 TGCCTGCTTACAGGTTGGCCACCGCGAGGACACAGTTCCTTGAAGGGCACTATGGCATTCTGCAAGGAAACATGGA  
 ACGCTTGGGTTGGTGTCTGATGATGAACTAAAGACTTAGCATGTTATTGATTGAAGACAAAGATCACTGGACAAAGTG  
 GAAGATAAAAAACAACCTCAAGCTTTTATAAATGGACAAGATGCAGAAATATTGTACTGCAGACTAGGGATGTGACAAATTA  
 AACAAATTTGTTAAACAGATAAGAAACATTATCAAAATTCATGTGAATTCACAATGCAGATGTGCTGCTGCCAGCAACG  
 GTTTGGGTCTCACGGTGCCTCCCTTTCAGATGGTTAAGCATTAATGTACCTCAATTCACCTCGCAATGTTTGCATTTCC  
 TTCTCAAAGTATGGCATAACAGGACTTCGCTGTCTGCTGCTTTCCTCAGCCATTTTTCCAAGTTTTAAACGCAATGA  
 CGTAGTGGTGGAGTAGACTTCAAATAAAGCTGTGCTGCTCCATTTCTGAGTGTCCAGATTCAATTCCTACATAGGAATCG  
 ACTCCTAAGATTGAGTATTTTGGGAATGGAGGAGACTGATGAGTTGCCGTACTTCCGAAAACACTTGCATCTTTTCATAGT  
 GAGCTAACGAGGGACGGAGAGAGAGGGGAGGGGCACAGTACAGGCAGGTGACCAACAGGCAGACAGAGTCAAGACTGTG  
 CACTTGGCCTAGGCTATTTATCGGCAATCAAAGCTCTATCTCGCAATGCAATATCTCGCAATTTCTTGGCCTGCAATGT  
 CTCAACTTCAGTAAAGCAGGGCCTATCATCAATGAATAGGCTAGGATATTGAGATGAGAGAGATGCAACACGTCACCTCTC  
 GCATCTGATCTGCACATATGCATGGGTTCACTTACCGCTGTTCACAGCGTGGTAGCCAGGGCAGAAAACAGTATGTAAG  
 TGCTGTGCTTCAAAGCTCTTAGTTGTTGAGGAAATGGACCAATATGCTGTTTACTTCTGAGTACATATAATTTCTT  
 TAACGTTAAACATTTACACCCCTATTTGCAGACAAAGTTGCAAAACAGTATTAGCCCTCAAGGGTACTAGGGCATGAATGA  
 CAAGTGAATTTATACAGTTCAGAGTTCACATTTGTTTTTCAATTTAGTTTGGTTTTTTGTCATTTAAGATAAAGCTAACTG  
 CTGTGACAAAGTTCACTTGTAGTAATTTATCTCATTACAGTGGTTCATTATGAATGAAGATCAGTGATTAGATGATTCCTAA  
 TGTTTTCAATTTATCTAACGTAGAAAATACCAACTGAGCTCTGTTAAGTTACCTAAGTTAATGTGGCCTATGTAGTTACTA  
 ATTAACAGGGCAGAAAGTACAAGTACAGAGAAACACCCCTGTGATAGGAAGTGGTTACGAGTACTTCTTACCTCCAAGAACC  
 TTTGTTGGTTTTTGTAGTATTGATCTCACACACACACACACACACACACACACACACACACACACACACACACACACACAC

ACACACACACACACACACACACACACACACACACACACACACACACACACACACACACACACACACACACACACACACATTCCTGTGAAAGGCCCAATTT  
 AAACAGTGTGTAACACCGGGGAGACAAACAGCCACAGAGAGAAGCCCAAGATGTGTTAGTCTCAGGGACAGTGGCCCT  
 GTTATCACATAATGACTGCAATGTAACAGAGCGACCAAAAATAAACCCTAATACACAATGCATAATGCACAAAAGAC  
 CAACCACACAGTGGGGAAACAATCGACTATGCAACTTCCTTCTGGCACATTTCTCAGTATTGCTTCAGACCAGAAAAGAC  
 CAGCTGTTTTGAAGTAGGCTAGCTCATGGGGGCCAGTGGGAACCTAGTGAGCACACAGGAATGCACAAAAGCAGATGTA  
 GGTGGATAGTCTGAACAGTCAAATGTCATGTGGGTAGTGGGTAACAATAGCCTACTGTTTCATCTTTTTGGTCGATATATC  
 TTTTCAAGTAATGCAAGTATGTTAAGCAATAAAAGATTTGATCATTGCTGCTAACAGTTCATAAGTGCAAAATTTGAAGTAAA  
 CACCATATCCGTTTTTGTATTTTTGAAAATTTGGTGACGCACTAGTCTCGTTTTCCACTCCACTTCGACATAAATTTGTGGT  
 AATCTGTCCCTTAGACAGCATAAGTAATCTCCTTCTAGAATTATTACTGACAAGCCATAAGCGCCACAGTGCAGTATT  
 ACGTAAACAGTTTTCCATTTTTCTATATTAGAAGGTATGCTCATAAGCCACTACCTGGATATCTGAATCAACCCAGGCCCT  
 CAGTGCTCCAGTGGGAATGTACCAGTCTGGCTCTGAGCTTCGAAGTCTCCTTGAGTCTGTCTCGACTGTTGTGCAATAC  
 ACATGGATTAGATCAAATCTGATTTAAATCAAGTTTGGTGGCTTTGTTTTCTCTTGCCAAAAAGGCCCTTTATTTAGATGC  
 TACACAGTCTTTGTTAGTAAATCTCAGTGTGATCCCCGCTTGACACTAGGGGTGAGTGTTCATATTCTAACAAAAACATTC  
 CTATGTAGGCGGGTGAGTAAATAAACTTGGAATCAACAGGTCATCCAGCACTTTATTTAAAGCATGCACATTCACCCCAA  
 AATAATGACATAATGTAGGCTAGCCTGGCCAATAGAACTTAGGAATAAATTTGGTGTGTTCTCAAGTCAATCTCTTAGGGA  
 TGGATCGAAAATTTACACCTAGGTTACTCAGGCTTACCTGTCTGACAGAGAAATTAGGCTGTAGGCGCAATAGCCATAG  
 ATTTGTCAGTCAATTTCCATCCCAATCATGCATTCTTAAATATCTTACCCTGTGTCAAGTGGGCTTTAAAGTAAAA  
 CCAACTCGAATTGAGAGGATATCTATTATTTTTTTTAAATGGCAAAAAGCACAGGCCACCCCTTGTGTAGCTTAAAGATT  
 TTGAAGAAAATTTAAATGGGATCCGATTATATAAAGTGTATGCATAACAGTGCCTTTGGTCCGCAATGTTTTATGCTAGAAAC  
 AAGCTGTAAAATACCAGGAAAGACGCTGACTCCGATGCATCCTTTCTTGACATTAAGAGGCTGAGCTACAACCTTCTAT  
 AGCCGATGAGACAAAACAGACTTTGATTGGGAAGTAATCTAATCTGTCACTATCAATCGATTAAGCTGTTCCACATGTA  
 CAATAGAAGATGATTAACCCAGACAGCTTTTAGGGAACACTTCTGACCATCTCTTGTGGTTAAGCCACAGAAGAAA  
 AGTAGCCAGCAGTTAAAGCTTACATTTGTATGTTGCTGAGCCTACTGTCTGGGGTGGAAAGGTAGGCCACTACTGTT  
 CTGGGGTGGAAAGGTAGGCCACTCTGTCTGGGGTGGAAAGGTAGGCCACTCTGTCTGGGGTGGAAAGGTAGGCCAAAC  
 TTTTAAAAGAACACGATCAGATTCCATTAATCATTGCAAAACAGGGACAGCTTTGTTGCAAAACCAAGTACACCGATTGGC  
 ATTTGAGAAAATATGATAAGATGAACACATAAGCTATCGCTCAGTCCATCTTGTAGCCTGCAATTTTGGTAATTTGTGTGGT  
 ATTTAAAAAGATTATGTAGAATTGTAGAATTGCCTGACATTTTTATAAAAAGGAAAATAAAATCTCAGACTGCAAAATAC  
 AATAATAGATTTCATGCAATGCTTTACTATAAAGGAGATCTTCCACTTCTACTGTTGTCCATGGTGTCTGTGAGCCCA  
 CACTTCTTGCCCTCAGCTTGTGCGCTATAAAGAATCTTGCCCTGCCATGTGATGCTCTGCTGCTGCTCAGCAAGCGTGA  
 GGTAAAACAGTAGACATGTTCTCTGCTATCCACTTTGTTTTAATTAATCTATTTTTGGGTATAGGGGATGGTCTATATAAAA  
 AATAAAAAATTACGTTACGTAAGGGATTAGGTCAAATATATTTTTTCAATTTAGAGAGGTCGATTTTCTCCATGTAACCC  
 TTATTACAAATAATGTTCACTCCCTTACCTGCATGTTTTCTCTGAGGTCGGTGGCTTCCCTCAGTGGCAGTATGGCTGTC  
 TTGAAGATGTGCTCCACAGCCTTGATGACCAGCACCTCATGGTGGCATACTCCCGACTTCTCTTGCCCTTACGCACAGA  
 CAGTCCCTTCTGTGAGGCTTGCCCCCGCCCGTGGTTGGTGTAGGGCACATGGACGAAATAGCCAGGCGTGGGGAAGGA  
 CTTCCCGCTTAGCGATTGTAAACGGTATGTGCCGAATCCCTGGCTGGAGACACTCGAAGGGGATTTGTACTGGCCGATG  
 AACTGCTCGCCAAATGTAGTCAATCATCAAGCACCAAGTCCGACACCCTAGCCACTGCCCAACTCAGGTAGGTTATCTTGA  
 ACTTTTCTGCAACAGTGGGTTCTCCCATTCTGATTGACAGTTTTAGTCTTTGCTCTGCACAATCAGCAGGGATGCCAT  
 GGATCTCCACATAGACATAAGGGTCAACAACATCTCTTGTGGAGCCTGAGCCTTTGGGTTTGGGGAAGTTTGTCCACTT  
 ATGATCTTTATGTGCAAGAGCTGAGGAGACACACCAGTACTGAGTCTTTGGTGTGGCACTGAAATATGACACCTGCTC  
 CCTATTATGGCTGTCGAGCACATAACCACAGTTCACATTCTGACCGAACCCAGCCAAATGTTTAGGTCCATCATCAGGC  
 CGGGGGTCTGTTAGTTCATTGCCCAGATCTGGCAACCACACTCCAGAAGTCCGAGGGTTTCACTGAGTGTACTGGAGTCTGC  
 CGCATGTTGGCTGGGTAGACTCTGCAATAATTTCTGTTGATTTAAACAAGTCGCCTGGGAAGTCATTTGGCACAGC  
 ACTGGCAAAGACCTATTGCAACAGAGCAAAGTTCCCACTGCTTGTGGCTTTGGAAAGCTGTGGGAAGTCTTTGAACGCAA  
 TCGATTACACAACGTTACCAGGTGAGAGAGTCTTGACAGCTGGAATTTTTTCAGTGGGATGCTCTGTGTTGTTCTGTCG  
 GCTTCAATGTTCAATCTTTGGGACATCTCAGCCCCCTCATCCTCATCAGTCACTTCGCCCTCTGAGCTAATGCAAGTCGT  
 GCCAGCTTCTTCCCCTTTCAGCAGGATCTTACACTTGAGGTCAAAGGTTGAGGGCAGGTAGCTGTCCCTCAGGTGAAGGTG  
 GATCCATGTAAATCTTATCACAAGAATCTTTTTCAAGTGTGAAACATGACCTTCTGCTGCTTTAAGGAGCAGTGGTTTC  
 TCCAGACCAATATCAGGGGAAGTCAAGTGAACAACAGGCATATTGTTGATGATGTCACAGACACTGCAGAAGACTAT  
 CTGCGAGGTCATTTGTGGCCAGTTAAATGACAGGCTCATTATCTGGCTATCCAGACACTAGTTCTFACACTACGAC  
 AGCCATTTTGGGGCACGGATGTACCCTGTAATGTGAGAGGGCCCTTAAACTGATCCTCGATCAGGTATGTGTTGTGG  
 GAAGCGTGTATGTAATAGTGGGACAAGGGCTGGTTCAATGTCTGCACACTGTTTTTTGTTCAAGGTCAAAAGATGTGGCA  
 CTCTGGGACATAAGATAATTTGGTAAAACCATCAAGGGAGAGCCAGCCCTTGAAGTGGCCCTCTTTGGAAGGTTTTCATACC  
 TCTGAATGACTCCAGACTGGTGTCTTCACTTACTTGTCATACCTTGCTCAGCCTCCAGAAACATAGTTAAGTCCCTG  
 GTATCTAGAAAATCTTTGTTGCTAGAGAACTGGACAAGAAGGAATACATTTCTGGTCTTGTGCAAAGGTGCTGAAAGAC  
 TCAATGAATCCTCTTAGTACACCACATCCCACCGTATCTTTAGATTTGTGAAACTCTTTAAACTTTGAGTTCAACTCT  
 TAACGTTTTTGTAGTCCAGGTTTAGGTTTTTAAATTAGCTGACCCGACACATAGACTGATGTGCTTGTGTTTTGCA  
 TCAGCCTGCTCAAAGAGGTCACCGAGCCAGGAGGAGCGCATGTTGTTCTGGTTGCTCTCAATCATATTCAGTGTGTGTTT  
 CCCATAGGATATCAGGTATCTAAGCCCGTCCACCATATGTTGGCCATATCGGCAGAGTTGCAACCAAGTCCAAAGACT  
 CATAGTTCTCCCATAGATGATTGAGAAGGCACAGTCCCTGATATCTGATCATATATCCGTTGGTCTTAAACGTTTCT  
 GTGTTTTTCCCCTGTCCGCACCTCTTTGATGGACTTGACATCAATTTTGGCTTTCTCTGACTCTTTTTTTGGAGGGTTC  
 CTTTAGAGACTGCATGTCCGATCCAGGAGGAAGTACGGTGGTAAACCGGGAGTTGGAGCGGACTTCTTCACTGTCTCAG  
 AGCCGTCACACTGGGCTTGTAGTCAGTGCCTCGACTGCATGCTCTTCTCTCAGTGGGCATGCTGCTGCAACGAACCCGTC  
 TTCTTCTCTCTTTGTCAGCCTCGAGCCATCCTGAGGAAAGAAAAGCAAAAACCTGAATACCTGTTCTGTAAACCCAGT  
 AGAAAATAAGTAAATCACTTTAGATTTAGAGGTAAGAAAGAGGGGCTGAATACTCTTCAATCACTTCTCTGAGCTGGAAG  
 CAAAATATTTAATTTATGAGATATACTATAGGCCAACTCAAAAAGTGGGAGTATCTTCTGACTGTATGACAAAAGCATTGTC  
 GCATGTGTCTGCCATTTGAAATGGGTGATTATTTCTACTACCTTTGCTATGAAATCTGTTTAAACAACCTTAGCATTCCCT  
 GATGATTTGGAGCTGCCTAATGTCACTGTTTACTTCACTGCAATTTCTTTGGAACAGCAGGTAGCCCTAGTGGTTAGAG  
 TGTGGGCGAGTGACAAAAGGTGCTGGATCGAATCCCCGAGCTGACAAGGTAAGAAAAAATAAAAAATCTGTCAATCT

GCCCCGGAACAAGACAGTTGGCCCTACAGTGGGTTGTAGTGTAAATAATATTTGGTTCTTAAGTACTGACTAGCTTAGTCAA  
TAAAGGTTAAATGGAAAAATAAAACATTTAAAATTTGTGAGCAATCTCTATTAACAGTATTTTACCTTTCAGGCTTAA  
CCCCAGGAAACTATGATTAACTAAGCACAGTTATGATTCATTAGTTTTCAGAAGGACCAAAAAAATTGATAATTTCTT  
AAAATAGCCACGAAGCATTGTTGAAGTATAAAAACATAATGTTCAAATCTGGGCATAAATGCAGTGGTATGGTAGCCTGC  
TAATTTCTCTTTGTCCATGTTGCTGCGAGGCTTTATGGTCTAGAGGTCATCAATGTTTCTCTTTTCAGCCCTACCTCTCAGA  
GCCAGAGGGGAGAGAATATCGAATCAAACCTGGCTCAATAAAAATAAAATAAATAAAACATTCCTGTGAAATGCGTGCTG  
TTAAATTTCTTACTCTGGGGAAGCAAGTCACACTCCGATCAAAGAGGAAGCGGCCAGTATATGGGATATAATCAGTTGGG  
ATAGGCAGTAGGGATGGGATTTGAAATAATTTCACTATATGAATAGTATCATGAATTTTTTTTTCATTTATTTGGATATTC  
TAAATACGTGTACGTTTTTAACTGAGCACTGCTGCTGCGCGAGGGAGAGAGGCTCAAACAACATTTTATTTGGTTGTGTA  
CACAGATTTGCAGATGTTATCGTAGGTGCAGCGGAATGCTTGCCTTCTAGCTCCAACAGTGCAGTAATACCTAGAAA  
AAAAATATAAAAAAGACAATCCGAAAAATAAAATATATCAGAACGAGCAATGTCAGAGACTGGAATATTAAGAAACTGGA  
GAGGAGAAAAGAGAGAGAGCGAGAGACATCTCGGCTACAGCCAAACTAGCTAACTTGTAGCAGCCACAATATTATT  
TATCATCCCATAACAACAGTACCTGTCTTACTGGAGTAGCCTAGAGAAGCTATAGTTAGCTAGGCTAAATGCCGGGCTTT  
CTCCCCAACCCCATTCGATAAAAACAAATCCTACTTGTGGTTGCTGCTGTTGTAGCCTACTCCTACTCCTTCTCATTTTG  
CAAAGTGTAAATCCATAATTTGATTTCCATCTTGCATTTGAATTTAGTGAACCTCTCACTCCACTTGGCTACATGTTGAGCCTC  
TTTGCCACTTTCGATTGGCCAACATAAAACAAGCTACACATGATACCTTGAAGGCTACCGGTCGGCTACCTGTCTTTTTA  
AATGGGGCGCAGCAGCACACCTTTTAAAGATGAATTAACATCCCTCGAAGGAATGTTGCCAAGTATGTTGCAAGCTAAATA  
ATTTGACCTTGGATAGTCTTCAAACCTGAAACTGAACTGTAGAGAGCTTAAAATAACTTTAGGGGGACATAAAACAA  
TTGTTAAAAGAGCATGTTTCAGCATGGGTTAATTAATGCATCATAATTTCTCACTCTAATATACAGTATCTACTGTGTA  
CATATCATTCTTAGTATATCTTGTTTAAATTCATCAAGTGTACATGCATATAAATTCATTTGGATTACTGTTACAGTGC  
TATTCAGGTTTCGTTCCGACATTTGTGATATCTTGTGTTTTTTGGAGGATTATTTGACATTTTACTGCATTTGTTAGGC  
GCTAGTAACATAAGCATTTCCTGAACTTCACTGAACTTATGATCTGCTAACTGTGTACGCATCCAATAAACTGGTTTGTATGAG  
ATGCTAACAAGAGGTCAAAGCAAAGTTGAGAGCAGCATACCATTTATGGTGCCTCACATGATGTGAAAAACACTGGTTG  
TTGACATATCTTGTGTATACGTTCTTCTAACTCCCAACCCCTTCTATTTTTTTCTTGAAGTATGAGACCTGAGCCGCTT  
GAAGGATCTCTTCAACAATTTGTGTGCTCGACTTAAGGTGCCTGTACAGTGCATTTATGGGTGAACCAATGAGTCCC  
CCCCATAAAAGGATCTAGTAGTGTATTTGGCCACGTGCGTGCATTTCCAAGTAGTCCGTGTCATTTGTGTCCAGCACC  
TTTATTTTCAACCTTTCACATTCAGCTGAACATAAAACATGAATTTCTGCATCAATTTACTAGCATCAGGTGAAGC  
CTTCAATGCATGCTGAAAGTGCCTGACTTATGAATGAATAGATTCCATTTCCATTTGCTGATGAAAAGATTCATGACATT  
ACTAAGCGGTTCCAAATTTGTTTTCCACCAATATTTGGATGCCTTTTTTAAAGGCAATTTGGAAGTTAAAAATGGGCATT  
AAAATACATAGACAAGCAGCTGCTGCTGCTCTGTTTACTGTAAGTTGTTTACTGAAATAAACAGCATGCTATGGCGCTATA  
GATGTTGGGGAAGCCTTCAGCGCCCATCGTCTGCAACGAACGCACCTGCCATTCCTGATCAAATGGCCTGCGATGTTCAAT  
GTCCCAAGGCTGCCATGTGATCTTGTCCACGCTTGTGTGCACTTACTAAGAGTAATGGCTCTCATGAAAGTCTATGTGC  
TTCACCCCCAGGGCAAAGTCCATTGAAAATGTATTACCTTTGGGTCAGAAAATCTGACTACCCTTTTTCTAGACAGAG  
TTGAATGACAGACATTAAGTCTGAAAATGTAAGTTTATGATTGACTATGAGCACCACCATAATATACGGAACAAAAAA  
TATAAAAACGCAACATGTAAGTGTGGTCCCATGTTTTCATGAGCCAAAACAAAAGATCCCAGAAATTTCCCATACACACA  
AGCTTATTTCCGTCAGATTTTGTGCACAAATTTGTTTATATCTCCTGTGAGCATTTCCTTTGCCAAGATAATCCATCCA  
CCTGCCAGGTGTTGGCATATTAAGCTGATTAACAGCATGATCATTACACAGGTTTCGTCACACAAACCAATGCCACAG  
ATGTCTCAAGTTGAGGGAGTGTGCAATTTGGCATGCTGACTGCAGGAATGTCCACCAGAGCTGTTGCCAGAGAATTTAATA  
TTAATTTCTCTACCATAAGTTGCCCTCAATGTCGTTTTAGAGAATTTGGTAGTACGTCCAACCGGCTTACAACCGCAGA  
CCAAGTGTATGACGTTGTGTGACGAGCGGTTTGCCGATGTCAACTTTATGAACAGAGTGGCCATGCTGGCGGTTGGGTT  
GTGGTATGGGCAAGCATAAGCTACAGATTGTATCAATGGTAATTTGAATGCACAGAGATACCGTGAAGAGATCCTGAGGC  
CCATTTGTTAGAATACTTAGAACATGTGAACAACATAAAATACCTAGGTGTCTGGTTAGACTGTAAACCCGCTTCCAGAC  
TCACATCAAACGCTCCAATCCAAGTTAAATCTAGAAATGGCTTCTTATTTTACAACAAGCATCTTCTACTCATGCTG  
CCAAACATACCCTGTAAACTGACCATCCTATCGATCCTGACTTCCGCGATGTCATTTACAATAAGCTCCAACACT  
CTACTCAAACAAGCTGGATGCAGTCTATCAGAGTCCATCCGTTTTGTCCACAAAGCTCCATATACTACCACCACTGCGA  
CCTGTACGCTCTCGTTGGCTGGCCCTCACTTCATACTCGTCCGCAAAACCCACTGGCTCCAGGTCATCATCATGCTAGGTA  
AAGTTCCCCCTTATCTCAGCTCGCTGGTCACCATAGAGCACCACCCTGTAGCACGCGCTCCAGCAGGTAGGTAGGTATA  
TATATATATATATATATATATATATATATATATATATATATATATATATATATATATATATATATATATATCTCTGATCACCCCCAAAGCCAATTCCT  
CCTTCGCGCCCTCTCCTTCTAGTTCTCTGCTGCCAATGATTGAACGAACATAAAAAATCTCTAAAACCTGAAACACTT  
ATCTCCCTCACTAGCTGTGAAGCACCAGCTGTGAGAGCAGCTACAGATACTGCAGCTGTACATAGGCCATCTATAAATTT  
AGCCCAAAACAACACTACCTCTTCCCCTACTGTATTTATTTATTTATTTATTTTGTCTCCCCTATTTTCTACTTTGCACTTTT  
TTCACCGCAAATCTACCATTCCAGTGTTTTACTTGCTATATTGTATTTACTTCCGCCACCATGGCCTTTTTTGCCTTTAC  
CTCCCTTATCTCACCTCATTACTCCTTTGCGAGCAGTACCTAGTGGTTAGAGCATGGACTAGTAACCGAAAGGTTG  
CTACATCGAATCCCCGAGCTGACAAGGTTAAAATATGTCGTTCTGCCCTGAACAAGGAGTTAACCCACTGTTCCCTAGG  
CCGTCATTGAAAATAAGAATTTGTTCTTAACTGACTTGCTAGTTAAATAAAGGTTAAAAAATAAATAAATAAATGTA  
AAACACTTATTTTTCTACTATATTATGACTGTATTTGTTTTACTCCATGTGTAACCTGTGTTGTTGTATGTGTCAA  
ACTGCTTGTCTTATCTTGCCAGGTCGCAATTTGAAATGAGAACCTTGTCTCAACTTGCTACCTGTTTAAATAAAGGTTG  
AAATAAAAAATAAATAAATAAATAAATAAATAAATAAATAAATAAATAAATAAATAAATAAATAAATAAATAAATAAATAA  
TATGTCAAGGATCTGTACACAATTCCTGGAAGCTGAAATGTCCAGTTCCTCCATGGCCAGCATACTACCACACATC  
ACCCTGAGCAGGTTTGGGATGCTTGGATAGACGTGTACGACAGCGTGTCCAGTTTCCGCAATTTCCAACAACCTTT  
GCACAGCCTGAAGAGTGGGACAACATTCACAATCAAGTCTGATCAACTCTATGCAAAGGAGATTTGTCACGTTGTGA  
GGCAATTTGGTGTGTCACCCAGTACTGACTGGTTTTCTGTATCCACCCCTTACCTTTGTTAAGGTTGCTGTGACCAACTG  
ATTCATATCTATATCCCAGTCACTGAAATCCATAGATTAGGGCTTAATAAATTCATTTCAAATGACTGATTTCCTTAT  
ATGAAGTGAATACTCAACAAAATCTTTGCATTTCTTTGCATTTATATATATATATATATTTTTTGAACAATGTATTTCTT  
ATGCCAAGCTAGTTTGTAGTAAATTTCAACATGCTTTGCTGATGAAGAAAATTGAAATCACATTTTGTCAAACAGTT  
GCATAGCCTAGAGTTTCAAGTTGATTTCGTTGTAACACTTGGGTTGTGGACCAAATCTATTATGCTATAAGATTTAGCT  
AAATAAGAATCACAGGCTGTGAGTACACTACAGCTTCATAGCCTACAAAATAAGTAGGCAAGGTCAAATATTTCTTT  
AGTACGGTATATGAAAGTGTGACCCGCTGATGCTGTGGTTCTCATCTGGTGAAGAATAAGCAACAGCATCTGACA  
TTTTATCTATTTAGTTCGGCTACTTCTGCCCCCTCATCTCATCTTGGAGTTGAAATGAGACAAAAGGAAGGCCACAT

TGAGCCATGAATGCACTTTAAAAGACAGACAAGCCTCTCTGCAGGCAGGGCTAGAGCTTTTCTTTTCATTCTATAGTCTGC  
 CGGTGTACACAGAGGATTAATAAAGGTACAACCTCAAGGATTTTCATGTTCAACACAGTGTCTGGGAGACATGTTTCAGAAAT  
 ATAGGACTTCGTCACAGAAATGAAAAGATCCTCCAATACACTCTATAGGCCTACAACCTCAATTGTATGACCGGATTC  
 AAAACGTAAACCATTGTAAACATGTCTGGGAGGTATGTTCCACAGATGTAGCCTATGAATCTTCTACCTTTGAGAAAGC  
 TTCAGTATTTTCATATGAATAAGTGGCGATTGTGATGAAGAAGTACTGGTGAGCTATTTTGTTTAACACCATTACTGGCAG  
 AGGTCTAAACTTCACTGTAACCCCCACTCGTCTGGTCTGTAGATAAATGAAATCAGCACATCTTTCTTTTACAACCTAT  
 ACATTAGCACATCTTTACACGTTATACATTAGCACATCTTTACACGTTATACATTAGCACATCTTTACACGTTATACATT  
 GCATAACAGCTCATATAGCTGTTTTAACAAAGCCAGTCAGAGAGAAATTAGTTGAAAGAAGAAAAAAAAAAAAAAAAAAAA  
 AAAAGAATATCCTGTCAATATAAATTTGGCTTGGCTTTGTGCGTAAAAAAAAAAAAAAAAAGAGGAGGACTGTTGCATCACTA  
 TTTGTTTCAAACGCCAAATTTCTAGATTGAGAAGCGCACTATAAAAAATTTGGCCAACACTGCATTAGATTTAAACAAAC  
 TCATCCACAAGCATAATGCTGTGGATAAGGAAAAAAAAACATTAATACAGTAGATTATCGCAATATTTTGGCATTTTATATTGA  
 AACTGTGACGCCAAGTATCGATTTGTAATGTGACGATCGCTAGTCAAGTTGTACCTGCCCCAAAACCTCTGGTATATCATC  
 CTATAACTAGTTCCCCATATTTTTCATTTGTTTAAATGGTGGCCAAACATGTTTTGTGTACTTTTACCTCTCATGGCTTT  
 CTACTGTCCCTCTGCAGCAGACATGTAGTGAGCAATGTGTTTGAACATCAAATCACATAAAATCACAGTATCGAATCA  
 CAACACATAGAAGTGTGATACATAGAATCGCAACACATCGGCACCTAAGTATTGTGATAATATCTACAGTGAGGGAAAA  
 GGTATATGATCCCCGCTGATTTGTACGTTTGGCCACTGACAAAGAAATATCAGTCTATAAATTTAATGGTAGGTTTA  
 TATGAACAGTGAGAGACAGAATAACAACCAAAAACAGAAAAACACATGTCAAATAATGTTATAAATTTGATTGCATTT  
 TAATGAGGGAAATAGTATTTGACCCCTCTGCAAAAACATGACTTAGTCTGGTGGCAAAAACCTTTGTTGGCAATCACAG  
 AGGTCTAGACGTTTCTGTAGTTGGCCACCAGGTTTGCACACATCTCAGGAGGGATTTTGTCCCCTCTCTTTGCAGATC  
 TTCTCAAGTCATTAAGGTTTTCGAGGCTGACGTTTGGCAACTCGAACCTCAGCTCCCTCCACAGATTTTCTATGGGATT  
 AAGTCTGGAGACTGCTAGGCCACTCCAGGACCTTAATGTGCTTCTCTTGGCCACTCCTTTTGTGCTTGGCCATGT  
 GTTTTGGGTCATTTGCATGTGGAATACCCATCCACGACCCATTTTCAATGCGCTGGCTGAGGGAAGGAGGTTCTCACCC  
 AAGATTTTACGGTACATGGCCCCGTCATCGTCCCTTTGATGCGGTGAAATTTGCTCTGCCCTTAGCAGAAAAACCC  
 CCAAAGCATAAATGTTTCCACCTCCATGTTTACCGTGGGATGGTGTACTTGGGGTCAATGGCAGACTTCCCTCCAAA  
 CACGGCGAGTTGAGTTGATGCCAAAGAGCTCCATTTTGGTCTCATTTGACCACAACACTTTCACCCGGTTGTCTCTGAA  
 TCATTAGATGTTTCAATGGCAAACCTCAGACGGGCATGTATACGTGCTTTCTTGGAGAAGGGGACCTTTCGGGGCGCTGCA  
 GGATTTAGTCCCTCAGGCGTAGTGTGTTACCAATGTTTTCTTGGTACTATGGTCCAGCTGCCTTAAGATCATTGA  
 CAAGACCTCCCGTGTATTTCTGGGCTGATTCGTACCGTCTCATGATCATTGCAACTCCACAAGGTGAGATCTTGCAT  
 GGAGCCCCAGGCGAGGGAGATTGACAGTTCTTTTGTGTTTCTTCCACTTTTGGGAGTAAATCGCACCAACTGTTGTACCT  
 CTCACCAAGCTGCTGGCGATGGTCTTATAGCCCCATCCAGCCTTGTGTAGGCTCAAAATCTTGTCCCTGACATCTGG  
 AGAGCTCTTTGGCTTTGGCCATGGTGGAGAGTTTGGAACTGATTGATTGATTGCTTCTGTGGACAGGTTCTTAATACA  
 GGTAAACAAGCTGAGATTAGGAGCACCCCTTTAAGAGTGTGCTCCTAATCGCAGATCGTTACCTGTATAAAAAGACACCTG  
 GGAGCAGGAAATCTTCTGATTGAGAGGGGTCAAATACTCATTTCCTCATTAAAATGCAAAACAATTTATAACATTTT  
 TGACATGGGTTTTTCTGGATTTGTGTTGCTGTTACTCTGTCTCCACTGTTCAAATAAACTTACCATTACAATATAGACC  
 GATCATTTCTTTGTGAGTGGGCAACGTACAAAAATCAGCAGGGGATCAAATACTTTTTTCCCTCACTGTAATCATGAGG  
 TCCCTGGGAATCCCAGCCTAGCTAGGAGAAACATTTGCTCGACATGAATAAACTTTAAAATGTTACTCGTGCCTC  
 AATCTTTTGGCATTTCCAGGAAAAGCCTTTATTTAAGTACTAGGCAAGTCAAGTAAAGAACAATTTTAAATTTACAATGATGA  
 CCTACCCCGGCCGAACCTTAACGACGCTGGGCCAATTTGTGCGCTGCCCTATGGAACCTCCAATCCTGGCCGGTTGTGATA  
 CAGCCTGGAATCGAACAGGGTCTGTAGAGCCCCAAGACATCTTTTGGAGAAGGAAAGGAAAAGTGGTAGTTTTTGTCTCTT  
 GGCAACTAGGATCATAGTCTGATACATCCCGCTAGCCTGGTTGTCATAAATGGTTAGTAACATTATAGCTTTGATACATCA  
 GGGCCTTTACATCTGCAAAATCTTAAAAGTCAAGCTTATCAGCAGGCAAAAGTCTGTGTGGAATTTACGAGTTAGATTTAA  
 CCTAGTCTACAAATGCAGGTGAAAGTCTCAACCATGACATTTATCAGGGTTTGGCAGCATGAAGCCATGAAAACCTGTATT  
 ATCTTTGAAGCCATGGCATCCAGAGACACATTCATCTTGTATCAACACGTCACATCTGGTAACAGGACTCTGGCCA  
 TGTAAATCGAACACTTTCTCACCTTCTGTGGTGTAAATGAAGAGAAGGCAGGCTGTACTTTAATGGTACTAATCA  
 ATCTCAGGGCCCCACCCTTCAATTTTACCCCTGCAGAGCCTAACCCAGAGTTTACACATACATCTCTGTGCTGTGAGGAA  
 GGATCTAATCTAAAAGTAAATTTATCAAATAAGTACATCACTCCAGACAGAAGTCTTCTGGAGGAGCTTTCCTGAGGC  
 TTAGAAAAAGCCAAAATGCATGACTGAAGATAATCCATGTGATCTGGACAAGAATTTTGAATTTATCTTTGGAAGGAGTT  
 TTCATTTGCTGTTGGCCTTTAGGTGTGGCTGCTAATCAGGATTTCTCTTGTGCGCTCAGTGAGGACTGGCTTCAGTCCCCA  
 AGCAAGAAAACGATAACACAGAACCCCCCCCCCTTCTGAAATAATAATTTCTGCGTCTTATGTAATGGCCAAAGTC  
 AGCAGGTTGTTTTTACTTACATACATGATTTTCAATTAAGACTCAAAATTTATCTGAAAGAGAACAATTTCTGTGATCTA  
 AAAGGAAATCCTCAAGAACATACTTTTTTAGGGATGATAACGACAACCATACAATCTCCAATGTTTTCAATTTGACTACTT  
 GCTCAGCAGAGATTTACTTTTATACCAGCATACTGGTCCACAATCCATTTTCAATTAATAGATTTTAACTGGATATTTAA  
 AATGTCCAATTTCTGAAGCAACACAAAATCAGTGTTTTGTATTCTACGATGATGCTGTATCCAGACAATCCCAGGAGTC  
 TGCTGATCTGAGGTGCTGTGTAATTAAGAATGACACAGGCCAATTTATCATCACGCTAGGCCTGCGTTGGTAAAGCAA  
 CCATGCTGAGAGGTCCACAACCTGACTCACTCTTGGCTGTTGGACAATTTGTGGAATCCAAATAGGTCATAAGTTGCGAC  
 GCCAACCTCACCAGTGTATGAGAAATGATATTGAAATTTCTCCCTTTATTTCCAGATACTGGATGTCCTGATTTCCCTTTC  
 AAATGTTTAGCCCTAATACATAGGCAGGTGAGATTTCTGCAAAAGTCTACACTGGAGTTCTTGTCACTTTGCACATAGAG  
 ATCGATTGTGGTTTTACTTTTCCCAGAAATACCCAGAGACATGATGTTTCGATAAATTTAATAACAATAGGCCTAGCTAAA  
 CCTGTGCAGGGCTTAGCGCATGGGAGATTTGGAGAGTATTTTTGTCTCCCTGCATTACATTTGAGTGTGTTTCAGCTGC  
 CAAAACCTCCCGTAGGATTTGAAATCCCTAATAGACTGAAACCCCTTTACTGGTTCAATGAGCAGTTTCAAGGACTGTCT  
 GTACGCTGAAGAATTCACAGGGGACCTATTACAGTCCAGACCAAGTGCATTGTATAGAGCATCACACAAGAGACCAACC  
 ACGACTGTGCATAATGTGATCATCAGTATTAGTCTACATCTATGCTAGGCTAAATACTATAGAATTTCTCAACACCGATA  
 TTTGACTTTATAAATTTATCATTCAAATGATAATGTTTCAAGGAGCATTCACACGACTCAAACCTCAGAGTGCAGATG  
 GTTGGCAGTAAATGTGTAATCTGAAATCTTATTATAGCATAAAGGGGATATTGCTCATCATTTTTGTCCCTTATCAGGCT  
 CTCGCTCAATAACATCAAACGCTCAAAGGGAAAAGAGCATTGGCTTTGATACCTGAGCCAGACTGAACTTTCCCCCG  
 ACTACAATGTGAAGAAGCCTCCCTATGTGGAGAAAGCTCGTGGCCCCACTCTGTGACTGCAACCTCATCTACCCTCTG  
 ACCTCAAACACCAGGTTTCAATTCACATCCACAGAGCAGATTGAGACCATAGTCACATTTTAAAGAGCAGATCTGAAAAC  
 AGCCATTAGGAGTCAGCCATGCTGGCTTAGGTTTTACTATATAAAAAGGGTAATTTAGATGCATTAATAGGCTAGGAGTCA  
 CAGCAAAATCATATATGTTTATGGTAGGCTATTTCCAGGTTGACCACATTGGCAAACAGTGTCTTCAAGGATATTTCA





GATTACTGAAATAGCAATCATAAAAAGCCTTCCCAATGATAAGTAATTATAGGATTAATGACGCATTGCTCCTGCAATC  
 CATTGATCCATGTTCACTTCATAGCTTTTAAAGGCTGACCCCATTAAGTCGACTGGTCGATTGTTTTGGTCGATAGGCTGT  
 TGGTCGACCAAGATTCTTTTAGTCAAGCAGTGGAAAAATAAAAAATATGTATGGCACACGAGACACTAGTCTGAT  
 TCACGCTGTCTGATGGACTAATCCATTGCAGAGCCGAGGGATGGCACACCAGTATCACCAGTAGTACATTTACCAT  
 TAATCCCACATTTCTAATCTACAATGTTTTGTTTTGGTTAAGGTAATTTCTGTTAATGCATTCAATATATATCACTACA  
 GTCCTTACCGTCGCTCTGTAGGAGTGGACACATTGTTTTGCAGAGCACACAACCTAGGCTACACTGATTTCTGATTTATTT  
 CATTCCATTTACAAGTTGTCAATTTATTAATTTGCTTTTTGTTTTGACTGTAGCGCTCCTGTCAATCTTGACTAAGGACAC  
 ACACCTAATTACACATAGAAGTAAGCCTATAGGCTACCTGGCCTGCACGCAATGCAGGCCTATAAATATGCCCTTTGT  
 CTGTTTTTACATCCATTGAAAATGCCAATAGTTCCTCAATGTAGCCTATTTGTGTCTCAGAAAAGGGGAAGAAAAAAAT  
 GTCATGCCCCGATCCGGTGGAAATATCATAAAATAGGCCTACCTGATTACTTCTTATCCCAGAAATCCCTACAGCTGTG  
 TGCTCTCCCGAGTCACTGGCACAGGAACTGAGGCCCCAGAAAATATAGGCAATGTTACTACTTCCCTAGCACGAGC  
 TTTGGGCCGGACCAAGCTAATAGTTGACAATGTTTTCAAGTTTCCTTGAGATAGGCCATGCGTAGCCAAGGATAGGATATC  
 ATAGGATATTTATTTTTTAGCTAAATGAGAATGAGTGAGCTACAACAAACAACCAACAGGTATGCTGATTAATCTGAATT  
 ATGATGTTAATTTGTTTACAAGGACAGGGAGCGCAGCATATTTAGCTCAATTAACCTAAATAGCTAGCTGGCTAACTTAG  
 CTAGCTGAGCAATCTTCTCTACATTTGATTTGATGCAGTCAAGTAGGACTGAGTGATATGGCCAAAATATATCACAGTATT  
 TAAAAAAATATCATCATACCGCCCAATTTTTATGTTTTGAATAATATGTATTATTTTGTGGATGCCATCATCCATTT  
 CGTATGATATGTTCCAATTTGCAATTTGTTGTGGCTAACGTTAGTTAGTTAAGTGGCTAGGGGTAGAGTTAGGCGTCAAGGTTA  
 GGGCTAGGAGTTAGCTCAGGGTTAGCTAAAAGAGTTAAGGTTAGGGGAAGGGTTAGATAACATGCTAAGGAAGTAAACAATG  
 CTGTTAATTAGCAAAAATGTCCTTGAGATTACACACAACCTTTGGATTGCTAGATGTTAGGGGTCAAGGTTAGGGTTA  
 GCTAAGAGGGTTAAGGTTAGAAGAAGGGTTCCTAACATGCTAAGTAGTTGCAAGTAGCTAAAAGTAGTTGCAAAAACA  
 GCACATTTTCTAAAATGCTAAACATGTCCATGAGATTGCAACACACAACCTTTGCGTTGCTAGACATTCACGTTATACA  
 CCCACCCGACCATACAAACCTTCCCTTAGTTTTGCTCAAGTAATCTTCCATCTTATGTAACCATGCAAAACATAACA  
 TATCATTAACAATTTCCAGGATTTACACTTACCATGTTACATCTAGTCTATGAGACCAGTGACATTTACATTTCAACAGGG  
 TTTGGTTAACGTTAGGGTGCAAGAAAGATCAGGCATCATAAAAACCTGGTGTAGGTATGTGTCATGTAACCTACTCAATAGA  
 CAAATAACCCTGATCTTGAGAAAAGGGGAAGAAAACCTAATTGCTGCAAGGGATTCCTAAGCTAACTAAGTAGAAGTATAAG  
 GCTCCCTTGAATAATGGAGCATCTGAATTGAAAGAGAACGATTGCTACTCCTGTTCTGCCCTTGACCAGATCAGAAGAT  
 CAATTTATTTGCAGTGGACAGTTGGAAAAATCCTAGGCTACATTTTGTGTTGGATGATCATTAAATCAGGGACATGCTCT  
 GAGCTGTGGTTTTGGCAACAAGATACAGAAGAGAATTGATAGCCATCAAACAATGGAGGGACCATGTTAAGGGAACTCTA  
 TGAAAAAATGATTTAGCTACAGGTTCAATCAAATAAGTCTTTCCAGTGGTTGGTCAAAAACGAACAGATCATTTTAA  
 AAATGTTAGGCCAAAGCTACATTTACATTCACATAATGTGTTAGGCGCTCATTGTAAATAAAGAAATTTGTTCAACGGTAT  
 GACTAATTAATAATAAATAAATCTGGATTTTGACACCTCAAGCAGTATGATACACAGTGGTTTTAATTTGAGAGTCTAC  
 TTTTGATTATATTTGAGCACATACTGTGACCTGACCCAAGCTAGGCCATCTCCCTCCACTCAGCAATACCACAACCTT  
 TGGAAAGCAAGTTTACAGCCACTGTGTGTGTGTTAATATGAGAAAGTGTATTTTTAAGTGCCAACCACAAGTTGTTTTTT  
 TGGGTATCTGTACTTCACTATTTATATTTTTGAAGACTTTTTACTTCACTACATTCCTAAAGAAAATATGTACTTTTTT  
 ACTCCATACATGTCTCCCGACACCCAAAATTAATTTGAATGGCTAGCAGGACAGGAAAATGTCAAATTCATGCACTTAT  
 CAAGAGAACATCCCTGGTCAATCCGATTTGCCTCTGATCTGGCAGATTCAGTGTTTACGTGTGCCCTGGCTATCTCTCAA  
 TAAAAAATAAAGCCAGCTGTCTGGTTGCAATTAATTAATTAAGTATATTTCAAGTAATTTCAAGTAATTCATTTACTTTTTG  
 ATACTTACGTATATTTCAAACCAAATACTTTTTACTCAAGCAGTATTTTAATAGGGGACTTTCACTTGAGTAGTTTTCTTT  
 ACTTTAACTCAAGTATGACAAATCGGGTACTTCTTCCACCGCTGCCGACCACATCCTCTCGTCACTGCAGAAAACTATT  
 CTGCTTTAGTAGAGAAATAGCTTATTTATATTAATCTCAGGGGTTGGAACCGTTTTTCAAAGAACATAAAAAAAGAACAACCA  
 TTTTTAGGAACAGAAACAAAAGTGATATCTAGTGTCCGGAACAGAACCATTAATTTCAAATCTTAAGAACAGTTTTCATG  
 TTTTTCTTTGTTCCAGAAAGATTACCATTCTAGTGCATCATTCTGTAATAATTCATGTGATATCTTAAACACATTCGG  
 ATTCATCTCATGTCAAGCCCTCCATCCCAACATCACAGGAGGCATAATAATGGCCGGAACGAAGCAAAATGGAATATCA  
 AACCTTGGAAACCACCGCTTTGATGATTTTGATACCAATTCACCTGATGGCAGTGTGGCATAATCAAGAAGCTAATTAACAGCATATTAT  
 ACAGAAATACAGTGCAGAGATCCTGAGGCCGATTGTGATGCCATTCATCCGCTGCCATCGCCTCATGTTTCAGCATGATG  
 ATGCACAGCCCCATATCGCAAGGATTTGTACACAATTCCTGGAAGCTGAAAATGTCCAGTTCCTCCATGGCCTGTATAC  
 TCACCAGACATGTCACCCATTGAGTATGTTTGGGATGCTCTAGATCGACATGTAGGACAGCGTGTTCAGTTCCTCCGCAAC  
 TTCGCACAGCCATTGATGAGTGGGACAACATTCACAGGCCACAATCAACACCCTGATCAACTCTATGCGAAGGAGATGT  
 GTCACACTGCATGAGGCAAAAATGGTGGTCAACCCAGATACTGACTGGTTTTCTGATCCATACGACTTCTTTTTTTAAT  
 TTTTTTATTAAGGTAAGTGTATCTGTGACCAACAGATGCATATCTGTATCCCAGTCAATAAAAACTTTGAAATTTGTTG  
 CATTATATATTTTTGTTCAAGTGTCAATTTCTAAAAAGCAGTGGTATCACTTTCTATTCACTGACATATCTGCAAGGCT  
 ACAGTGAAGGTGGAAGTGGAGTGGCGTAATATGGCAGCACAGGTCTAAGACCTGCAGCAGAACCCTGCTACTAATGG  
 GAGCTGTCCATTTTAGCTCTGGTCTGACAGGGCGAGCATGACTAGCCTGGAAATTTGCCAACGCTGATTTGCATATGGA  
 CCAGTGTGTGATTTATACCAACTTGTCAAGGCTGGCAGAGAAGGCTGTATTGTGTAGTCTTACAGTCCCATATTGCATTT  
 GGGACATTTGGTGGTAAAGCCAGTATCATTTTTCTGACTGGATCCTTTGGCAGTTCTAACACGACGTGTGCATTAAGCTTT  
 GTTCAATAGCAATGAGAAGTTTGTGACACAGAAGTTTCCCAAACTGTGGGCACCTGGACCTACCAAGAGCTTAGTGAG  
 TGAAGTATGTGACGCAAACTTTTTGGGGGAAATCAGAATTTCTGTCTCCAATACCTTTCAATAGACATAACTGAT  
 CTATTAATTTGTAGTTTTTTTTTAAACCGTGAAGTACAGAGGTGGACATCAGATGAAAATAAATAGTTCTTACAGCTGGGA  
 AGTGAGACAGGTCCTTGTGTGGTGGTGAAGATTACTTTACAAGGCAGAAAATGTCAATGTTACCTTCATCAATCTCCAGG  
 CAGAGAGAGCGTCAAAGTTCAACGCTTTCAATATGCCAAGAAAGTGTGCCACAAAACCTGGCTTGAAAAAGAGCTAAC  
 TGGAAAGAACCATGTTCAATTGCCGGCAATCAACAATACCACAATGAAAAGGCTCACATGAATAACATAGTTGATTGAG  
 ATTTTGGACAATAACAAGTACGAGCCTCATCTACAGTTGGTCCAGAAATAGCTGATCAAAAGATATTTGATGCAACTTCA  
 GTCACAGTGGGGACTATCCATTCATAAGGCTATACAGTTGACTTGCAGATATGATAAGAAGGCTAGAGCAGGGATGGCA

ACTCCAGTCCTCAGGGGCCAAAGTGGTTGTCTCCTTTTCCCCCAATCCCTAGCAAACACATTGATTAACCTAATTGCA  
 GTCTAAACTAAAATATCATTACTTGATTTATTGGAGTCAGTTGTGTAGCTGGGGCAAAGGACTGGAGTTGCCATCCCT  
 GGGCTAGAGTGAAGCCATAGCAGCTTAAAATCAAAGAAAGCATAAGAAATAAGGAAAAGACCTACATAAGCCCTTTCCA  
 TTAACCTGTGTCAGTATTTTGTGTGACATTTAGAAAGTTGCATAGAAATTTGTAACAATGCCTTTGTTCTTCTTGAA  
 CTGTCTTATGACAAACAGCAGGCTGTAATGATGTACCCCACTGCCCCAAAAAATGTAAACATTCGCAAAAAAAGCTTGAG  
 TGCCGAATAAAAAAATCAAGTGGTTGAACTGTTCCATAATCCATTTAGGGAAATGCACGTTAATAAATGTGACAGT  
 TTGTATGCCCTTCCCACCTAAAGTATGTTTCATGTCTCAGGTGGCCCAAAAGGCCAGCATGGATAGAATGCAAGAATTGA  
 CTCATATTTGCCATATCTAATAATCTCATGTGCCACATATCGCCATGGTCTGTGCCATTGTGCAACTTGCACCTCCTG  
 TAGATCTGAAATAATTTGGGTTGTGAACTTGCATCCAGCCAACCAGAAAAGCAAGGCCAAAACAATTCAGGCATTCTTGAA  
 AGTCAAGACAATCCTTGTCTGCAAAGAAACATTTTATTTTGAAGCAGTAGACATTTAGAATTAACCTGTAGTGGAG  
 CTTTATAGTTATGCAATGACATCACGTGCCAGAGTAACTTAAATTTATCGTCAATAATCATTGTCTGAAAAAAGCTGTT  
 CCATCATAATTCCTCACAATAAAGAACGTTTGCACAAATTAACAATCCACACATTGAATGGATAAAAAAATGTTGTCAAT  
 CTTTAGAACATTTCTCAATAGCTGCTGTTTCTATTACACATCGCAATGGTTTTCTTTGCGACATTGCTTTTATTGAATA  
 AACCTGGGTCAATGGAACCTGCCTAATGAGCAGCAATAAGCTAAATACAAAAATGTTGTGAGTTTAGCAATGTGATAGC  
 CTCAGTTTGAAGACCTAGGCTACACTTGAATGCAATTTATAGGCCATTTTAGGGATTGTAGCCTTCACTTTTAGGGAA  
 AACAGTCAAACGAACAACCTTGAACACAGTCAATATGAGGAAATAGGTGAATGCATCATTTCTTTCATGAGGCCATCT  
 GTTGTGTCTAATATAGAGCCCACTGACAACACTTATCGTAATGAGACAACGGAATACAAGCTGGGAAGTCTTAAGTA  
 GGAAAAGCCTTGTCTCGTGATGAACTGCTTACAAAACCAATGTGTTTACAGACAACAACGCCCAATTTAATTTGGAAC  
 GTTCTTAACCACAGGAATTTGGCCCCGACTTTTCCCAATGTGGAATGGCAACATATGGTAAAAGTCAAGCACTCAAGATT  
 GTTGTGTTGAAAGATGTGCAACAGATCACTTTGGTCTCCAAATTCAGTTTACGCAAAGCATTCAAGCAATGTTTTCCAA  
 CAGAACAGAACGTACTTGTAAACAACGCTGTAGCCTAGACATTGTTGCCATACTAACTCCCTGTGTCTTCATATTAAG  
 GTCCCATCTTCAATTCATAAATGAGTTAGTGAGGACTTGGCCTAGGATATTTTTAAACAATAGTATTCAAACTGATAAC  
 GGAGGTTTATCCCTCTAGTAGCTAGCCTAGCAGATACTGACTAAATCGCGCAGATATTTACCATGAGTTGCAACATA  
 GAAGTTACTTAATTTGCTCTGAATGTGAATGTAATTCGATGAAATTCAGACGAGACCTACTACTTCACTGACTGT  
 TTGCATTGTCAATGTGTGTAACAGTGGTTTTTGGATTGCAAGTGGTGTATGGTGTGAGGTTGCTGAACCAATCAATGTG  
 CATAACATGTTACACTTCGTGGAAAATTTAATCTAAGGATGCATCCACTATGCTAACCATCTATCCCTCTTCGCGTTTTT  
 AAATCCGTATACAAATATGATTTACCTTTATAATGTCTCTGCGTGGTATTTCCAGATTTGGAATCCAATCCGACAGAG  
 GAGTTGTTGGCTGTTTCAAGCCCTGGGCTGTGAGGTAACGTTACGGCGACAGATTGTGATCCAACCATGCTGCGCGTAT  
 CCCACAGTCCCACTGAAGACCGATACTTCGCACCTGCTCTCCCGTCTGTTTTATCACTGGGCAAGGCCACCGAATCC  
 CAGTATTCGATGGAGTGAAGCTGATCTCTCCAACTCCGCTAGGAACTCGACGACAGGCAACCAACCAAGCCTAG  
 CTGTCAAGCTGCAATGTAGGTGTTTTCACTTGAACGCTGTGTTATTTATCCAATGTCTCTGGCTTGTAGCTAGCTACCT  
 GTTATAACATCTGCACAAAACCGTTCCGTATCATCTTTCGGTCCATATTTGACTCGTACCTAATGTGCGGTGCTCCATGG  
 GTTGTGCTCTGTAACAAAACGCATCATTAAACCAGAGACTGAATACCAATAGATTCAACTGTTTAAATGCTAGACATT  
 GCATGCACACAAGAGGTCTAATAATGTGACTTTGAATGGTAGCTAACGTTAGTCAGCTAATTACATGCAACAGTGAAT  
 TGCATTGCAAAATTTGTTTTCACAAATGGATGCATCAGCTAACGTTAGCTACATCGTCTCATTTGAAATGATGTCTGGTTA  
 AGGCATTCGATAGTTAGCAGCTAGCTAAGCTTCGTTAGTCAACAAGTTAGCCATATTTACAATCGTCACGGATAGACGT  
 GGCTGTTTGTAGTCTGCTGTAGTCTAGACTAGCTTAAATTTAGTTATAGCTAGTTAACGTAACGTAACGTAACGCTTAC  
 TCGTTTCAATGTTACGTTAACTGACAAATTAGCCACATTTTCATACACTTGCCCATAGTTAGCTAACATTAACCTAACCTGGC  
 AAGCTAACACTACAGCCAAATATGTTCTAACTAACCTCATGTATCTGTGCTACAGCCACCCATGCCAACATAATTTCTGT  
 GTTATACACTTGCCTTGGCTTGATAAAGTCTTGTAGAAAAGAACAAGTTCCATTCTGCTGTGCTATCCAGCTGCAACG  
 ACTCGACTACTGTTCACTTTCATCACCACCAGTTGCTGCATTAGCTAACTTGAATGTAGCTAGCTTGTAGTACCCGA  
 CTAACCCAACTGTCAATACATTTGCTATCTAAATACAATTTATCTAGCGAGCTAACCGTTTAGGAAAAGTGAACGAAC  
 ACTTGTAAACAGGCGTAACGACAACGAACCTTCTGTCAATCAAACCTTACTCATAGAAAAGGTAATCGATCAAACCCG  
 TTCTCTATAATTACACTAGACTGACATGGGCAGTGTGTTGAAGCCAACGCGCTACGTCCTGGCTGCGCCCAACAC  
 AGTAAAAACAAAATCATTTTGAAGCTATAGAAATGCAATTTAATGTCTAAACAATTTTTTCCCAGCTTTATTCTATT  
 ACAGACACCTTAATGCATACTTTACATATATATATATGTTAGTTAAACATACTTTATATATATATATATATATATAT  
 ATATATATATATATATATATATATATATATATATATATATATATATATATATATATATATATATATATATATAT  
 TACAGCCTTATTCTAAAATTTGATTTGAATAATGTTTTTCCCTCATCAATCTACACACAGTACCCCAATGACAAAATTA  
 AACATGTTTGTAGAAATGTGTGCAATTTATTTAAACAAAACAAAACAGAAATCCTTATTTATATAAGTATTCAGACCTT  
 TGCTATGAGACTGAAATTTAGCTCAGGTGCATCTTTTCCATTTGATCATCTTGTAGATGTTTCTACACTGATTTGGA  
 GTCACCTGTGGTAAATTCAAATGATTGGACATGATTTGGAAAGACACAACTGTCTATATAAGGTTCAACAATTGACA  
 GTGCGTTCCAGAGCAAAAACCAACCATGAGGACAAAGGAATTTGGCCGTAGAGCTCCGAGACAGGGTGGTGTGAGGCAC  
 ATATCTGGAGAAGGTTGCCAAAAAATGCTGCGAGTATGAAGTCCCAAGAACACAGTGGCCTCCATCATCTGAAATG  
 TAAGAAGTTTGAACCAACAAGGCTTCTCCTAGAGCTGGCCGCCCCGCAAACTAAGCAATCAAGGGAGAAGGGCCTAGG  
 TCAGGAGGTTGAACAAGAACCAGTGGTCACTCTGGCAGAGCTCGAGAGTTCTTCTGTGGAGATGGGACAACCTTCCAGA  
 AGGACAACCATCTGTGACACTCCACCTTTATCGTAGTGTGGTGCAGACGAAGTCCCTGCTCAGTAAAAGGCACATGAC  
 AGCCCGCTTGGAGTTTGCACAAAAGTCAACAAAAGAACTCTCAGACCATGAGAAAACAACATATCTGTTGACACCATATA  
 GTCCCTGTGCCAATAAAGCTAGGTTAACCTGCCTAAATGACTACCGACCCGTAGCACTCACGTCTGTAGCCATGAAGTG  
 CTTTGAAGGCTAGTCATGGCTCACATCAACAACATTTATCCAGAAACCTTAGACCCACTCCATTTTGCATACCGCCCCA  
 ACAGATCCACAGATGCAATCTCTATTGCACTCCACACTGCTCTTTTACACCTAGACAAAATCAACACCTTATGTGAGAATG  
 CTATTCAATTGACTACATCTCAGCGTTCAACACCATAGTGCCCTCATAACTCATCACTAAGCTAAGGACCCCTGGGACTAAA  
 CCTCCCTCTGCAACTGGATCCTGGACTTCTGTACGGCCACCCCATGTTGGTAAGGGTAGGTAACAACACATCCGTCCAGCT  
 GATACTTAACACGGAGGCCCTCAGGGTGTGCTGCTAGTCCCTCTGACTTCCCTGTACTTCCCTGTTCACTACATCTGTGGCCA  
 GGCACGACTCCAACACCATCATTTAAGTTTGTGATGACACAACAGTGGCCTGATCACCACAATGACGAAAACAGCTATA  
 AGGAGGAGGTCAGAGACTGGCCGTGTGGTGCAGGTTCAACAACCTCGAGAGCATCCTGACTGGTTGCATCACTGCCTGG  
 TATAGCAACTGCTCGCCCTCCGACCGCAAGGCATATAGAGGTTAGTGTGATGGCCAGTACATCACTGGGGCTAAGCT  
 TCCTGCCATCAGGACTCTATACCAGCGGTGTCAAAGGAAGGCCCTAAAAATTTGCAAGGCTCCAGCTACCCTTGTC  
 TAGATTGTTCTCTGCTACTGCACGCAAGCAGTAGTGGAGCTCTAAGTCTAGGTCAAAAGAGGCTTCTAAACAGCTTCT  
 ACCCCAAGCCATAAGACTCCTTAACATCTAATCAAATGGATGGCTGAAAACACAACCATCGCGGATCTACGAATTTCC



GGCCAAGGGGGTCAATTTAAAAATCATCCCTTCCCTCCCTTGCCCTGCATGTGTATACTCGTCAGACGTCATGATACGTCA  
 TCAGAAGTGTCCATTTAATTTGAGGGCTGAGGGGATAGGGTGTGTCTTTTAAAGTGTGGACCGCAGTCAGTGTTCCTC  
 CAACACATTTGGTCCGGCTGGCTCCGGGTTAAGCAAGCAGTATGTCAAGAAGCAGTGCAGCTTGGCAGGGTGTGTTCG  
 GAGGACGCATGACTCTCGACCTTCCCTTCCCGAGTCCGTAACCTTGGCTGCATTTCCAACCTTGTCTGCAGGATATAC  
 TTTTCAAGGCAAGGGGCGAGGGAGGAATGATTTTAAATGGGCCACCCTTGCCTGGAAAATTTGTCACTTGTTCATCC  
 CGCAATTTGTGTTTTTACAGCATCGGTAGCTTGTGGGTGCTTTATATGCGCTACAGTCAATTTATGAGTGCATGTCTACTTAT  
 ATTAACATATGTAATTTATCATATACGCTCCTGTATGATAGCTTGCAAATTAATTTGGCTAATAAACGTTAGCCTGCCTTG  
 ATACTTCTGCCAAGCTACTTTCCAAAAGCTAACCAACAAAACATCATTACGTTTATGAGACCTGTTTGTGCATTAGTA  
 GCACAATTTGCAACTTATTTACTTTTCGTTTTTACTTTACACTTGTATATTTGACTCCATATTTGACGTTGAGGTTTTAAGTT  
 TTGGCAGACTTTTCTAGTGGATGAACAATCATCGCAATTTAATTTATGGGGCGTTTTCAGGCCCTGAAGTGAACATAAT  
 GAAAAACGAGGGCTGAGGGCTTACGTTGCAAACTTCCCTTGGCTTAATCATTGGACTGACGACAAATATGGCCAC  
 GGGGATTTCTCCAAGGCATAAGGTGAGGGTAAGTAGACGAGGGTGTGTCTTTTATAAGCCCTTGTCCAAGGTACTCCA  
 TACCGGAGTTGCAGCGATGGGACAAGACTGTAACCTACCAATTTGGATATCACGAAATTTGGGAGAAAAAGGTGTAATATA  
 TATATATATTATTAATCAACTTAAAAACAACCTCCAACCTGTATTTTGAATGAATATACAAAATTACAATTTAAAGCGTTT  
 CAAATTTGAAGTACAGTTTAAATGAGTGTGTTGAAATTTAAAGATGGTGAACATATACTGTAGTATACTTACTGAAAAAC  
 AATTAATTTAAAGTACACTTCTAATAAGTGTATTGAAGGTTGACGGTAGTATATTTATAGTATACTAAAAGCTTAAAAA  
 ACTATTAATTTAAAGTACACTAATTTAAAGTACACTATTAATTTAAAGTGTGTTAGTGTATATATATATATATATAAT  
 TACTTAAGATAAGAAAAATACATCTCGTATTTGAGGTATATTTTTTAAAAAATTTGATATTTAAGTATACTTGTAAATA  
 TATAAAAAAGATTACAAAATTTTCACTTGGGATGTTAATCAGCCAATATAAAAATGTTGGATTTAATTCAGTGTCTTGA  
 ATTTAATTTCAAGATGCTGGATTGTGTCAATCCAATTTTCTGGCTAAAAATATAGCATTACGGTCTGAAAAATGT  
 ATATGCTGTATTTATGTCAATTGTCAACAGATTGTCAACATAACTTGTAGAAGACTAATTTGTTCCCTTCAATAGCATAGCCT  
 ATCCAGTTATTTAAACAGATAACAGTATAATGCATTTGTTTTCTTGTAGCAGCTCTTATTTCTTTAGCTATTTAAAAAG  
 GATCCTTACAGTTTACGTTCTAATAATTTAGTCAAAGTAAATAATGTCTGAGTTTATGTGCAGGAAGGTATGCATTTGCTG  
 AAGTTTATATAGCCTACACATGAGACATGAACATAAACAGTTAAATTTGAACCTTTTTTTTAAATCAAAATCTAGACAATA  
 AATATACTACAGAATACCTTACCTCTATATCAGTGTGCCAGTTCCACCTTGTGTTGCCTTCTCAGGGTCTTATTAGAAG  
 TCATGTCTTTTTTCTGATTAAGGATCAGTTTACATAAAATCAATTTGTTAAAAATACATAATTTGATCAGTTCCAGGATGTTGT  
 AAGGGACAGGAGAAGGGACGGTGTACACTAAGTGTCAAAGTTTGGGTTCACTTAGAAAATTGCCTTGTTTTTTAAAGAA  
 AAGCACTTTTTTCTGGTCTTTAAAAATAACATCCAGGATGCNNNNNNNNNNNNNNNNNNNNNNNNNNNNNNNNNNNNNN  
 NNNNNNNNNNNNNNNNNNNNNNNNNNNNNNNNNNNNNNNNNNNNNNNNNNNNNNNNNNNNNNNNNNNNNNNNNNNNN  
 NNNNNNNNNNNNNNNNNNNNNNNNNNNNNNNNNNNNNNNNNNNNNNNNNNNNNNNNNNNNNNNNNNNNNNNNNNNNN  
 NNNNNNNNNNNNNNNNNNNNNNNNNNNNNNNNNNNNNNNNNNNNNNNNNNNNNNNNNNNNNNNNNNNNNNNNNNNNN  
 CCCCAGTTGCCTTCTCACTGTTGACGTTGAGACTGGTGTTTTTGCGGTACTATTTATGAAAGTCCAGATGAGGACTT  
 GTGAGGGCTGTGTTTCTCAAACTAGACACTCTAATGTACTTGTCTCTTGTCTCAGTTGTGCACCGGAGCCTCCCACTCCT  
 CTTTCTATTCTGGTTAAAGCCAGTTTGCCTGTTCGTGAAGGGAGTAGTACACAGCATTTGTACGAGATCTTCAAGTTTCT  
 TGGCAATTTCTCGCATGGAATAGCCTTCATTTTCTCAGGACAAGAATAGACTGACGAGTTTCATAAAGGAAGTTCTTTGTTT  
 CATGCTGTTTTGAGCCTGTAATCGAACCCACAAATGCTGATGTCCAGATACTCAACTAGTCTAAAGAAGGCCAGTTTTTA  
 TTGCTTCTTTCATCAGGACAGCAGTTTTCACTGTGTCTAACATAATTTGAAAAGGGTTTTCTAATGATCAATTTGCCTTT  
 TAAAAATGATAAAATTTGGATTAGCTAACACAACCTGCCATTTGAAACACAGGAGTATGTTGCTGATAATGGCCCTCTGTA  
 CCCTTATGTAGATATTTCCATTTAAAAATCAGCCGTTTTCCAGCTACAATAGTCAATTTACAACATTAACAATGTCTACACTGT  
 ATTTCTGGACAAAATTTGAGAAAAATGGACAAAATGTTTGTCTTTCTTTCAAAAACAAGGACATTTCTAAGTGACCCCA  
 AACTTTTGAACGGTAGTGTACATCAGGCTGCAGGCGTTCATGTTATTTCTGATACGGAATTTACTGTTGTACAACAGAGG  
 CATCTGGTGGTGACGCTGACTATCTGATAGTGAGTTGTAACCATTAAACGCAGAGTCCATGAATTAATCTTCGTGATCA  
 TTTAATGTGATTAAGGAAAAATAAAGGGTTATATATTTCTGTCAATGTGCAAAACATTTAATGTTGATAGAGCAAAATGGT  
 AGCAGCATGAATCAACTTAAAGTTAAATGTGTTGAGGTATTACAGTTCTGTATAACCATATTACTGTGTAGCAGAAAATG  
 AAATGATGATAAAATTTGCTGTTACTGTAACTGATGGAATATTGCTTCTCCAATGTTAGAGGATTTCTTATTCAACTT  
 CCATGAAAATCAAAAATGGATTTTCTTTGGTGAATGGGTATGAAGACATTGAAACCAATGAAAGGGAACAAAATAAAT  
 GCAACGCTTCAAACTAACATTAGTTACTGTAGGTTAGACACCTTATGTTACCCCTGGAGTAAGAATCATGTTTTATCTGT  
 AGCTTAGACCTACAGTGATAATTAAGATATTAGTGATAGTAAAAATTTTCAAATCAACTGACTTTACAGAAAGTACAGT  
 AGATAGATCAACCAGGTTGTATGTTTTTTTTTCTTCTCATAGACAAGGAAACAACAGAGGAATCATTTCAAAGTTATC  
 GTTCAGTGACACATTTTGGAGAGGCTGGTGGTTTCACTTCTTGTGCTATTGGGATGATTTGGAGTTGCACAGGACAGG  
 GTCGGACACAGGCTGACACCAAGGATTACTGCACCAGGCTTGTTTTTTTCATGCGCGGACACTGATTTGTTTAT  
 GTAAGGACAGGGATTGCTGAAATGACACATGAGAAGAAAACATTGGGAGTCAATTCATTGTATGTTGACAGTTTATATTT  
 GGTGATATTGTACATTGAACCGTGTGAACATGTTTTCAAAAGCTATCACTAACATTGAGTCAATTTGGTAAGATTTTATG  
 ACCGCATGATTTTTTCACTCCGCTGTACTTACTGCAAAGCTTATTTTTCGCACGAGTTGGGGCAGTCAGACATGTAGCT  
 CCTTCTTGTATGGAGCCACTCCTCTGTAGTTTCCCTGTAGCCAAAGTATTGAAATGATCGCTGGATGATGCCTACCT  
 TCCACTACCAGTTACAGTAAATAGGGTGAATTTGTACACAGGTTAGGTGCATTTTGTAGTGTGATTTGGTGCAACATACG  
 CTCTGTAATACTGGCATCCATAGAAAGTAGACTGAGCCAGGACAGGGCCACACCACAGCCAACTTGTATGAACATGTTT  
 CAAACCACCTATATGAAAGGAAACACAGTTTAGTGTTTTTTCAGAGTTTTTCTGTTGGCGAATAACATAATGAGACTTGTGCGT  
 AACTACACACAACCTTACTACCATACAGCAAAGCAAAATCAAAATCACATTTTACTTGTGCGCATACTCATATTTAGCAGAT  
 GTTATTTCAAGGTGTAGCAGGATGGTCCATAACAATATACACTGAGTATACAAAATGTTAAGAACTAAGAACACCGTCTTT  
 TTCCATGACACAGACTGACCAGGTGAATCCAGGTGAAAGTATGATCTCTTATTTATGTCATTTGTTAAATCCACTTCAA  
 TCAGTGTAGATGAAGGAAAGGAGACAGGTTAAAGAAATGATTTTTAAGCCCTTGAAGATTGAGACCTGGATTGTGTATGTGT  
 GCTATTCAGAGGGTGAATGGACAAGACAAAATTTAAGTGCCTTTGAACCTGAGTATGGTAGTGGTCCAGGCACACCG  
 GGTGCAACTCAATATTAGGAAGGTGTTCCATGTTTGTATATACACTCAGTGTATGCATAATACATAATGATGAAATTTGCTA  
 CCAAAAAAATTTGTAATAAGTTAGTAACTATTTTTTAAAGTATACTCCTTTGGTGTCAATAGGATATGATGATTAATAT  
 CCCTGAACATGACAGAATAGGAAGTGTAGTTTTAGTGTGTGTTTCCATCTGACCCTAATTAGTGTGGACATATAAAAA  
 ATACCCCATAGTCCATTCGGGGTCTTTTGTACCTAAAGGTCCAGTGTAAAGATTGTATAGTGTGGACATGCTATCTTT  
 AGCAACTGTTTTGGTGTGGTCAATCTGTTTCAAGGATGTTTTATTTCCATATCGGTTTGTATTCAAATTTGACAG  
 CATGTGTATTACTTTGAAAGTTATGCCACTGCAGTTGTCTTTGATGTGTTTGGAGAGATGTTTATGAGGGTCCAAGCAGT  
 ATATTTGAAACTGCCCTCCTTTAAGGTGACTGTTTAAAGTTAACACATTTTGTATTTCTAAAATAGTTACTGTTGCTGTAGA

TATAGTGGCTAACCGTCTTTTCATGCAGAAGTTGTTGTCACTGTTTTCGGTTGTGAACATGGTTCAGTGTGCACTGGAA  
GCACTGTAGATATTGAAAAATGATACAGCCATCCAGTGAAAGGAACTGAGGTGCGTTTTTCGCTTTGTTTACTGTACATT  
TTTTAAACAAGCAAACCTTTAGCTGATTCATTCACCTTTTGTGCTTTTTTTTTATATCCACCTCAGACTGTTTCTCTAT  
AAATGGGCTATGAAACCTGTAATTTGATCAGATTACACGGTGCATTTGGAAAGTATTCACACCCCCTGACCTTTTCCC  
ACATTTTGTTATGTTACAGCCTTATCTAAAATGATAAAAATATTTTTTCCCTCATCAATCTACACACAATACCCATAA  
TGGCAAATTATTAGCAACTTTATAAAAATAAGAACTGATATGACCTTACATAAGTATTAGACCCCTTTAGTCAGTACTT  
AGTTGAAGCACCTTTGGAAGCGATTACAGCGTTGCTGCACAGCTATTTTCAGGTCTCTCAGAGATGTTTCGATCGGGTTC  
AAGTGCAGCCTCTGGCTAGGCCACTCAAGGACATTAGAGACTTGTCGCGAAGCCACTCTCGCTTGTCTTGGCTGTGTG  
GTTTTCATTAAGGATCTCTCTGTACTTTGCTCCGTTTCATCTTTGCCTTGATCCTGACTAGTCTCCGAGTCTCCCTGACACTG  
AAAAACCCCCACAGCATGATGCTGACACCACAGCATGCTTACCCTAGGGATGGTGCAGATTTCCTCCAGATGTGA  
CGCTTAGCATTACAGCCAAAGAGTTCAATCTTGGTTTCATCAGACCAGAGAATCTTGTCTCATGGCCTGAGAGTCTTT  
GGGTGCTTTTGGCAAACCTCATAGCGGGCTGTCTGCTTTTTATAAGGAGTGGCTTTTGTCTGGCCACTCTACCACA  
AAGGCCTAATTGGTGGAGTGTGTCAGAGATGGGAGAACCTTCCAGAAGGACAACCATCTCCACAGAGGAACTCTGGAGCT  
CTGTAGATTGACCACTGGGTTCTTGGTCACTCTCTGACCAAGGCCCTTCTCTGGGTGCCAGCTCTAGGAAGGGTCTT  
GGTGGTTCAAACCTCTTCCATTTAAGAAATGATGGAGNNNNNNNNNNNNNNNNNNNNNNNNNNNNNNNNNNNNNNN  
NNNNNNNNNNNNNNNNNNNNNNNNNNNNNNNNNNNNNNNNNNNNNNNNNNNNNNNNNNNNNNNNNNNNNNNNNN  
NNNNNNNNNNNNNNNNNNNNNNNNNNNNNNNNNNNNNNNNNNNNNNNNNNNNNNNNNNNNNNNNNNNNNNNNNN  
NNNNNNNNNNNNNNNNNNNNNNNNNNNNNNNNNNNNNNNNNNNNNNNNNNNNNNNNNNNNNNNNNNNNNNNNNN  
NNNNNNNNNNNNNNNNNNNNNNNNNNNNNNNNNNNNNNNNNNNNNNNNNNNNNNNNNNNNNNNNNNNNNNNNNN  
NNNNNNNNNNNNNNNNNNNNNNNNNNNNNNNNNNNNNNNNNNNNNNNNNNNNNNNNNNNNNNNNNNNNNNNNNN  
NNNNNNNNNNNNNNNNNNNNNNNNNNNNNNNNNNNNNNNNNNNNNNNNNNNNNNNNNNNNNNNNNNNNNNNNNA  
CATCTCATGGATCTCCAGTGGAAACAGGATGCATCTCAATTTTCGAGTCTCATAGCGAAGGGTCTGAATACTTATGTA  
AAGTATTTCTGTTTTGGTTTTAATCACTTAGCTATATGCGGTATTTGTTGTAGATTTGGTGAGGAAATGTTTTAT  
TCATCCATTTTAGAAGGCTGTAACGTAAACATGTGAAAGGCTCAAGGGGCTGAATACTATCTGAAGCCACTCATGTC  
ATAATGTATCTGCATGTAAGATGAATGTTACCTGTGTGATGAGTGGCCGATGCATTTACCATTGATAGATCCATTGGGATAG  
GAGTAATCTATGACCTCACTGTCCAGGCTGTAACATTTTCAGTCCAATCTTAGAAGCGGAGGACATGAACAGGTTCTC  
ACCAATTTTCGTAGTCTGTTCAGAAGTAAAGCATGCATGAAAAATTTACTAAATAGGTGTGTAACAGTGAAATCAGACTG  
GAACAGTTGACTAAAATGTCTTGAATGCAGGATTTAAGATGTCAACAAATGTAAGCTACCATAGAGAGTCACTGGTGAT  
AAGAAATCAATGACATTCAAAATATATTTGAGCTTAAGATCATGCTCACAATGATAACCAATGCAGCGAAGTCTTGAGTTG  
CATGAATCATAAAAATATATTGCTTGGTTGCTACAGCAGGGGAAAACAGGAGATGCAAGGAGAGCAACAAGGGG  
AAACCGTACCGCCAAGCATTGCGACTGTGGTGGCCACTGAGCCATGGAGCAGGTGTCAACCAAGCCGTAACAGCTGGCC  
GCTGCCTCCTCGCTCAAATCTGTCAGATCCAATACTAACAGTTTTAGAAATAAGCCATCCACAAGACTGACATCCACATA  
CTAGTGTCCAAGGAGTATTTTGTGGCCACTGTATTTCTCTACCTGTACATAGACTAACCATATAGGCCTACCATAGGGC  
TGCTCTATGAATTACATATCAGGGATTATATTTCTTATGACGATTAGGGGGATACTATGTTGGAAACATTGATTGTGA  
GGTTTTGATACTGATGAAAGTATATGAATCATGAAAGTGTACCATTGAGCATGTCTCTAGCAGTTGGCATAACCGCT  
CTCCGGAAGGCCTTGTGTGGTTAAGGATCTCAGCTGAAGTGTGGTGTCTGGGCAAATTTCTATACATATATACAC  
ACACACACACTTATTTTGGAATTTGATGACACTTACTTCCACGTGTAATACTTCACTAACCAATAATAACAAG  
CAACTATTTACTCCTAATATCTTTGCCAACATCTGGACAATGAGTCCCATAATCCACTTTCTTTTGTAAAAACAACA  
CGTGATGAATTAACATTTGTGTGTGATGACTAAATCCAGTTTAATTCATTTATAATCATGTTGGTAGAGGATAGTGAAG  
TGGACACACCCTTTGGGAAGTCTTACATTTTGTGCTCACAATTTGAAAGGATTACATTTTTTTTCCACAGTACAGATC  
TACACAACCTACTCCACCTTTTTGAAAGTAAAAGAAAGTATAGAAAATGTAACATACAACAACAACAACAAGATGTT  
TTATTTTTGCGTGTGCTTACACCCCAGAGTTAATACTTGGTGGAGCAGCCATTACAGATGTAATCATTTAGAATCAT  
ATCTACCAACTTTACAAACTCTTAGGCAGCATATGCCAATTTTTGTCAAGATTGCTCAAGAGCAGTAAATTTGGG  
TTGAGAATCAATTGTAAGTAAATTTTAAACCTTTTCAAGCAAATTTGTCTNNNNNNNNNNNNNNNNNNNNNNNN  
NNNNNNNNNNNNNNNNNNNNNNNNNNNNNNNNNNNNNNNNNNNNNNNNNNNNNNNNNNNNNNNNNNNNNNNN  
NNNNNNNNNNNNNNNNNNNNNNNNNNNNNNNNNNNNNNNNNNNNNNNNNNNNNNNNNNNNNNNNNNNNNNNN



GGTGTGACAGACTCAGGACAACCTGAGCTTTGGAGGAATACGCAGATTTAAAGAGGAGTCCGTAATTTGCTTTCTAATGAT  
 CATGATCTTTTCCCTCAAAGAAGTTAATGAATTCATCACTGCTGAAGTCAGAGCCATCCTCTCCTGGGGAATGCTGCTTTT  
 TAGTTAACTTTGGCAGCATCAAAAAGAAATTTCCGATTTGTTCTATTTTCTCAATTAAGTTGAAAAATAGGATGAT  
 CGAGCAGCAGTGGAGGCTCTTCGATACCTGCACGGTACTGTTCTTTCCAAAGCTAGTCGGAGACTTCCAGTTTGGTGTGGCG  
 CCATTTCCGTTCCAAATTTTCTGGAAGTTTGTCTCAGAGCTCGTGTATTTTCTGTATACCAGGGAGCTAGTTTCTTATGAC  
 AAATGTTTTTAGTTTTTAGGGGTGCAACTGCATCTAGGGTATTGCGCAAGGTTCAATGTAGAGTAGCATAGTGTCTTAC  
 TGTATGTACTGTAACCCATGTTAACATGTAGAGTAGCATAGTGTCTTACTGTATGTACTGTAACCCATGTTAACATGTAG  
 AGTAGCATAGTGTCTTACTGTATGTACTGTAACCCATGTTTACATGTAGAGTAGCATAGTGTCTTACTGTATGTACTGTA  
 ACCCATGTTTACATGTAGAGTAGCATAGTGTCTTACTGTATGTACTGTAACCCATGTTTACATGTAGAGTAGCATAGTGT  
 CCTACTGTATGCACTGTAATCCATGTCTACATGTAGAGTAGCATAGTGTAAAACCTACTGTAGAACAAGACATATGGAT  
 AGACACCATAACCTGGACGTATTGGTGCCGGAGTTTCCCTGACCCGCTCACTGTTCCCTTTCAAAGGAACCTGTGTACAACCTG  
 TTTCAATTTCAACTCTGTGTTTGGTTCAGAGTCCGAGAAATGGTAGTCAGGCTGATGCTTTCCACATTTGTGAAATACCAGGT  
 TGTCTCTACAATTTCTGGTCTGAATTTCTCTCAGTTTTATTGCATTTGTGAGCAATGACCAATCTTACAATGGCATGCTCT  
 TGGTCTTCAATGAGGAGCTTTCCCTCTCCCAAGAGGGAGGAAGACATTTGTGTCTTCAATAGGAACAAAATACAACATA  
 TGTATTTGTATTGGCACTGGTGGTCTACAGTTACAGTGGGACATAGCAACAGTAATGATAGAAAAAGCCCTTGTGAAATG  
 CATTACTTACCTGTTGGTGTGTTGAAAATTTCTGGATAATGGAAGCCAGGTTGACCGTCTGAGATTAGGCTGGACTCTTT  
 CACAGTCTCTCAGTATAGAACATGGTATTAGGCTGGACTCTTCCAGCCCTCTCTCAGCCCTCTCTCAGTATAGCCATGGTAT  
 AGGTTGGACTCTTTACCAGTCTCTGTGTAGACCATGGTATTAGGCTGGACTCTTTACCAGCCCTCTCTCAGTATAGCCATGG  
 GACCATGGTATTAGGCTGGACTCTTTACCAGCCCTCTCTCAGTATAGACCATGGTATTAGGCTGGACTCTTTACCAGC  
 CTCTCAAGTATAGACCATGGTATTAGGCTGGACTCTTTACCAGCTCTCTCTCAGTATAGACCATGGTATTAGACTGG  
 ACTCTTTACCAGTTTCTCTCAGTATAGACCATGGTATTAGGCTGGACTCTTTACCAGCCCTCTCTCAGTATAGACCATGG  
 TGGTTTATCACATGGTCTTTGATGGTGGATCTTATTTCAATCAATGACAACAGCTCTTACTCTCCTTTGAAACACCACCAG  
 CATTCTTACTCTCTCCCTTACTCTCTCTCTCTCTCTCTCTCTCTCTCTCTCTCTCTCTCTCTCTCTCTCTCTCTCTCTCTCT  
 TGCCGTTCAACTACTCTCTCTGCTTCCCTGCTTCCAACTACTCTCTCTCTCTCTCTCTCTCTCTCTCTCTCTCTCTCTCTCT  
 TGTGTGTTCTGTTTCCACATTAACAACAAAATTAATCCAAAGAGTCCCTTTTTAGATCATGCATTTCTGTTTTACAGGTT  
 AGAAATGAAAGCACTTTATCTAGTTCTGAACGAATCCAGATAATACCATGATTTATTTTAAATGAATAATGGTGAGTGA  
 GGTGGTTTGGAGCTATAACAACAAACATGCTAACCTCTCACTTTCTTTTTATCTGCAACACATTTATAATGCAATGAGAGAAT  
 ATGCCGAAACCAAGCACCCACGTCTATGTTTGTATGTCATATACCTTACCCTCATTCACTTCTGTCAAGAACACTTGT  
 GAAGTTTGTATATTTAACTAGGTTGTTCTCTTACATACTATACATGTTTGGGTGAAGCAAAATACGATGTATCTCACTG  
 ACTTAAATATACTGACAACAAAAGTATAAAGCAACGCAACGCAACAATTTCAAAGATTTTACTGAGTTACAGTTACATATAAGGA  
 AATCAGTCAATTTGAAGTAAATTCATTAGACCTTGTCTATGGATTTCAATGACTGGGAATACAGATATGCATCTGTGGG  
 TCATAGATTCCATTTAAAAAAAAGTAGGGGTGTGGATCAGAACCAGTCAAGTATCTGTTGTGACCACCATTTGCCTCATGC  
 AGCAGCACACATCTCTTCGCATAAAGGGGATCAGGCTGTTGATTGTGGCCGTCGAATGTTCTCCACTCCTCTTCAAT  
 GGCTGTGTGAAGTTGCTGGATATTGGCGGGAACCTGGAACACGCTGTAATACGTGTGCAATTCAGAGCATCCCAAACATGCT  
 CAATGGGTGACATGCTGGAGAGTATGTAGGCCATTTTATAGTATTTTTTATTTAACTTTTATTTAACTAGGCAAGTC  
 AGTTAAAAACAAATTTATTTTCAATGACAGCTAAAGTCTCTGCAAGGACGGGGGCTGGGATTAACATTTAAATA  
 AATATAGGAAAAAACACATTTTCAAACGAGAGAGACACACACAGCATACATAAAGAGAGACCTAAGACAAACAACAT  
 ACAACACACCATGGTCGCAACACAACATGACAATAACATGGTAGCAGTACAAAAACACAGGTCAAACGTTAATCTTTTTTAT  
 AAGTAGGCAAGTCAGTTAAGAACAATTTCCAATAACAGCGGTTACCTGCCTTGGTCAAGGGCAGAACGACAGATTTTTTA  
 CCTTGTGAGCTCGGGGATTTGATCTTGAACCTTTTCGGTTACTAGTCCAATGCACCTAACCACTAGGCTACTTGTGCGCCC  
 TTTATGTGAAATACCAGGTTGTCTCTACAATTTCTGGTCTGAATTTCTCTCAGCTGTATTGCATTTGTGAGCAATGACCA  
 ATCTTACAATGGCATGCTCTTGGTCTTCAATGAGGAGCTTTCTCTTCCCAAGAGGGAGGAAGAGATTTGTGTCTTCTCAT  
 AGGAACAAAATAACAACATATGTATTTGTATTGGCATTGGTGGTCTACAGTTACAATTAATCTCTCTCTCTCTCTCTCTCT  
 GATAACAGGTGGCGAATCGCATCTCTGCATGCTGCAGACATATCAGTGTGGATGACGGATCACCCCTCAAGCTGAA  
 CCTCGGAACAGCGGAGCTGCTCTTCTCCCGGGGAAGGACTGCCCGTTCCATGATCTCGCAATCACGGTTGACAACCTCCA  
 TTGTGTCTCTCTCCAGAGTGTAGAACCTTGGCGTGACCCTAGACAACACCCTGTGCTTCTCCGCTAACATCAAGGCG  
 GTGACCCGATCCGTTAGGTTTATGCTCTACAACATTCGCAGAGTACGACCCTGCCTTACACAGGAAGCGCGCAGGTCCT  
 AATCCAGGCACTTGTATCTCCCGTCTGGATTACTGCAACTCGCTGTTGGTGGGCTCCCTGCCTGAGCCATTAACCCCT  
 TACAACCTACCCGAGACCGCGGAGCCGCTCTGGTGTCAACCTTCCCAAGTTCTCTCAGTCACTCCCACTCTCCGCGACA  
 CTCCACTGGCTTCCAGTTGAAGCTCGTATCTGCTCAGAACCATGCTGTGCTTGCCTACGAGGCTGTGAGGGAGCCGACAC  
 TCCGTACCTTACGGCTCTGATCAGTCCCTACACCCAGAACAGGGCACTGCGTTTATCCACCTCTGGCTGCTGGCCTCCC  
 TACCTCTGCGGAAGCACAGTTTCTGCTCAGCTCAAACTGTTGCTGCTCTGGCACCCCAATGGTGGAAACAAGCTCCCTC  
 ACGACGCCAGGACAGCGGAGTCAATCACTGCCTTCCGAGACACCTGAAACCCACCTCTTAAAGGAATACCTGGGATAG  
 GATAAAGTAATCTTCTAACCCCCCCCCCCCCCCCCCAAGGATGTGTGTGCTTTGGGACCTTTAAACAGAATGTGACTG  
 GCAGAATGGGTGTTGTATGTGGAGGATGAGGGCTGCAGTATATATCTCAGATAGGGGGAGTAAGGCCTAAGAGGGTTTTTA  
 GAAATAAGCATCAACAGTGGGCTTTCGACGAGTATAAAGAGATGACCAGTTTACAGAGAAGTATATACTGCAGTGACG  
 TGCTCTATAAAGGACATTGGTGGCAATCTGATGGCCGAATGGTAAAGAACATCTAGCCCTTGAGAGCACCCCTTACAGTA  
 CCTGCCGATCTATATATTATGTTTCTGTAATCTAGCATGGGTAGGATAGTCACTGAATCAGGGTTAGTTTGGCAGCTGG  
 GGTGAAAGAGGAGCGATTACGATAGAGGAAACCAAGTCTAGATTTAACATTAGCCTGCAGCTTTGATATGTGCTGAGAAA  
 AGGACAGTGTACCCTTAGCCATATCCCAAGTACTTGCATGAGGTGACTACCTCAAGCTCTAAAACCATCAGAGTTAGT  
 AATCACACCTGTGGGGAGAGGGGCAATCTTCTTACCGAACCACTTGACCTTTGTTTTGGAGGTATTGAGAAACAAGGTTAA  
 GGGTAGAGAAAGCTTGTGAAACCAAGAAACTTTGTTGTAGAGCAATTTAACACAACATCCGGGGAGGGGCGCAGCTGAG  
 TATAAGACTGTATCTGTCATATAAATGGATGAGAGATTTCTTACTGCTTGGAGTATGTTGTTGATGTTAAATTTAGAA  
 GAGGCTGGGGCTTAGGATTGAGCCTTGGGGTACTCCCTTGATGACAGGCAGTTACTGAGACAGCAGATTTTCTGACTTTTA  
 CACACTACACTATTTGAAATGGTTAGTTAGCAAACAGGACAAAGGCCCTCAGAGACACCAATACTCCTTAGCTGGCCC  
 ACAGGAACGGAATGGTCTACCCTATCAAAGCTTTGGCCAAGTCAATACAAATAGCAGCACAAACATTGCTACGAATCAAG  
 GGCAATGGTGACATTTATTGAGGACCTTTAAGGTTGCAGTGACACATCCATAACCTAAGCAGAGCAATTCCTCTTTTGGCC  
 GCTTTTCCCTCCAGTTCTCTGCTGCCAATGACTGGAATGAATTGCAAAAATCACTGAAGCTGGAGACTCTTACCTCCCTC  
 ACTAGCTTTAAGCACCAGCTGTCTGAGCAGCTCACAGATCACTGCACCTGTACATAGCCCATCTGTAATATCCCATCCA

ACTACCTCATCCCCACTGTATTTATTTATTTATCTTGCTCCTTTGACCCCTGTATCTCTACTTGCACATTCATCTTC  
 TGCACATCAATCTCTCCAGTGTCTAATTTGGTATATTGTAATTACTTCGCCACTATGGCCTATTTATTTGCCTTACCTCCCT  
 TTTCTTACTATATAGATATAGATTTCTTCAACTGTATTATGACTGTGAGTTTTGTTTATTTCAATGTCTAACTCTGT  
 GTTGTGTATGTGCGAAGCTTTTGTCTTTTCTTGGTAGGTCGACAGTTGTAATGAGAAGTTGTTCTCAACTGGCCT  
 ACCTGGCTAAATAAAGGTGAAATAAAATTAATAAATAAATAAAGAAACCAGATTGCATACCAGACAGAATACTGTA  
 GCGACCCGCACAGACAGCTGTGGTTATGTGTTAGGCTATTAGTGGGTTGTGTTTACTTACCAGTGTGTTGCTGGGTCATG  
 CCAATCAACCTGCTATCTGCCAATCACGGGAATGCCAGGAATGTTCTGATGCCGGGCATCCTGGTGGTTGGCGGAGTGGC  
 GTGGAGGGGGGTTGGGCAGGGGGATGGAGCATTGGAAGTTAAGACCGGGTTAGCCATGTTTCGCTCTCTACGTCTGGG  
 CTTCAAGAGAAGGTCACGGTTGGTTGTAGGGTACCTTTTCAATTTATTTGGCGTGGGCTACGGCCAAACAGTAGCCTGT  
 GTTAAGTTGGGTTAAATAACCGTCAATTCGTTAACCCTCCTCTGTCTGGACAATTGTTCTTTTATGATCTAGTCAGG  
 CATTACAATACTATAGACATCAAGAAAGCCAGTCAGTTGACAGGGCAAAATAGAAATAGGCCTCAACAGTTAGGATCAG  
 CTTGATCTCTCCCTTAAATAAAGGACGAACCGTGGCTGCCTTCCAAGCAATGGGAACCTCCCAGAAAGGAGAGACAGG  
 TTAATAAGGTTGGAGATAGGCTTGGCAATGATAGGGGCAGCAACCTTAACTGTTGAGGACAGACGTTCTGCTAGCGGAA  
 CCCGTTCCGCCTGGGAACCCCTAGCCAACAGCCAATGGCATCGCATGGCGGAAATACAAAACCAACTAAAATACCAC  
 AATTCATTTTCTCAAACAATCAACTATTTTACACCATTTTAAAGATAAGACTCTCGTTAATCTAACCCATTGTCCGAT  
 TTCAAAAGGCTTTTTCAGCGAAAGCAAAACATTAGATTATGTTAGGAGAGTACCCAGCCAGAAATAATCACACAGCCATT  
 TTCAAAAGCAGCATAATGTCAAATAAACCCAAACACAGCTAAATGCAGCACTAACCTTTGATGATCTTCATCAGATGA  
 CACTCCTAGGACATATGTTATACAATACATGCATGTTTTGTTCAATCAACTTCATATTTATATCAAAAACAGCTTTTTC  
 ACATTAGCATGTGATGTTTCAAGACTAGCATACCCACCGAAAACCTCCGGTGAATTTACTAAATTTACTCATGATAAACGTT  
 CACAAAAACATAACAATTTATTTAAGAATTATAGATACAGAACCTTCATGCAATCGCGGTGTCAGATTTTAAATAG  
 CTTTTTCGGCGAAAGCATGTTTTGCAATATTCTGAGTACATAGCTCGGCCATCACGGCTAGCTATTTTGACACCCACCAAG  
 TTTGGGGCTCACAAACTCAGAATTACTATTAGAAAAATTTGGATTACCTTTGCTGTTCTTCGTCAGAATGCACCTCCAGG  
 ACTTCTACTTCAACAACAAATGTTGTTTTGGTTCCAAATAATCCATAGTTATATTCAAATAGCTCCGTTTTGTTTACTCGG  
 TTCAGGTCACTATCCGAAGGTTGACGCGCGAGCGCTTTCTGTGACCAAAAAATTCAAAATATTTCCATTACCGTACTTCGA  
 AGCATGTCAAACGCTGTTTAAATCCATTTTTATGCTATTTTTCTCATAAAAATAGCGCTAATATTCCAACCGGGCAACGT  
 TGTATTCATTCAAAGGCTGAAAGAAAAAATTTAGTAGTCTCGTGACCGGCATCTCCAGTGTCACTGTCCCAGGCTGA  
 CCCTTACAAATTTCTCTGCTGTTCTTCGCCAGAGACAGCAGACACCCATTCCACTTTCTGGCGGCTTTAGAGAGCCA  
 ATGGAAGCCTTAGAAAATGTCATGTTACAGCACATATGCTGTATTTTCGATAGAGATGCAACAGAAGGCAACAAATTTGT  
 CAGACAGGGCATTCTCTGTATGGAATCTTCTCAGGTTTTGGCCTGCCATATGAGTTCTGTTATACTCACAGACACCATTC  
 AAACAGTTTTAGAAATTTAGATTGTTTTCTATCCAAATCCACTAATATTTATGCAGATTCTAGTTTCTGGCAGAGTAG  
 TAACCAGATTAATCCGGTATGTTTTTTATCCGGCTGTGAAAATACCTGCCACCTATCCCAAAGAAAGTTAAAGAAAGAAAGG  
 GTCTAAGCCATCTGACCCAGATGTTTTTTTTGGGTCAAGTTTCAGGAGCACCTCGGACTCAGTGACTGCCAGCAGGGAGA  
 AACTTTGTCAAGGGGCAGGGGAAAAAGAGGAGAAGCATCGGGAATAGTCCGATCAGAAGAGGTGGGAGAGGAGGACATT  
 TTGGACGGTCAAGGAGGCATGGCTGAGTCAAATAGGAATCCTGACTTAATAAAGTGGTGAATAAAGAGCTCAGCAATGTG  
 CTCCTTGTGAGTAAAAACCATCATCAACATTAAGGGACATGGGCATCTGTGAAGAGGAGGGTTTTATTTCTCCAGGCTCT  
 TAACCTTTTCCAGAATCTTCTGGGGTTAGACCCACAGAGAGAGCAACTGCTCCTTAAAGTAACTTTGGCCTTAGTGTACT  
 TATTACTATTTGGCTGAACAGAGCCAGTCAAGCTGAGTATGCAAGTGTGCCGAGCCTTTTGCCAAATGCAATTTCTTGAGA  
 TGGAGTAACTCTGCAAGATCATGGTACAACCAGACCTTGAAGTGTTTTTAATTTCTCATTTTCTTAAATGGGGCGTGTGTTG  
 TTAACAATACCCTGAAAATATAAAAAATAAAGGTCCAAGTGTCTGACAGAGGGGATCAAGCTGATTCTATACAATTTTAA  
 CAGAGCCAGTTTCATGAAGGAAGGCTTGTCTTAAAGTTTTTTAGCAAGTGTCTATGACAAATCAGGACAGGTTGTTTC  
 ACTAAGCAGCCATTACAAACACAGGCCAGCAATTCAAATGTTTTTCGGACAGACTTGGTGGAGACAACCAGCACTGAAG  
 GTGATTTCTGGTAAAGATTGCAACTTCCCACATTTGGAAGATCTGTCTTGGCGAAAAGGTTATAACCAGAAAGGTCAG  
 TATTCAAACACTCTTCTTAAACCACTCTCAGTAATGACCAACACATCTGGATTGGAGCTGTGAACCCACACTTTCAAT  
 TGATCCATTTTGGCTAATAAGCTTCTAGCGTTAATGTGAGAAAACCCAGGCTTTTACGAGAGCAGAAAATCAGTGAAGCA  
 GATATCAGAGCACAAGTCAAGATTGGGGCTAGCAACAGTAGATGGGCCAGGGTGTACATGCACATTTACAGATATCATCA  
 ACAGTAATACAATCAAGGCACGGCAGTACAGGGAGAGCTCTGCAGTGTGATTTATGACATCTGAATGTGCATCAGGT  
 GGCAACAAGATCATATATACATCAGGTAACATGAATACAAAGCCAGTGAGAGGTGGTTAGAATAGGATGGGAGGCCAAA  
 AGTCTGTGTAACCAATAGAGAGTCACTCCCAAGTGTGGGAACAAACAGTCTGTCCCACGGTTGGGTAAGAAAAGTTTCGTA  
 GTTAAACAAGCATGCAGGAGTCAAGGAAAATAGCAAAATGCATAAGAAAAAATTTATATATAAACCATCTGGGACTA  
 GCCATTTGAAGTTAAGAGTCAATCCACCCACAGTGTACCATGGAAGAACTGGGTCATTTTCAGTCTCGAAAATTTGTTA  
 TATTTTTGGTGTGATGTGGTAAGACAGTTTAAATAAAATCACAAGCCATTTTATAAGTTATATACAAGTCTTAAATGG  
 ATGTACCAATCCCTGATTTCCCTTTTAAATAATATTTCTCCCTGACCCCCACCCCTCTCACACATAGTTGTATG  
 ACTAGATATTAACCTATCCTCAGACTCTCAGACTGTACAGTTCCATTTGTCCAGTGTCTCTTGAACATTTTACCCATGTG  
 ATGCTGTACCTTCAGTAATAAACACTAGAGGGCATTCTCACTTATAAAAAGGATGAGGCAGCTACACTCTCCTCCATATG  
 TATTTGGACAGCGAAGCCGAAATGTAATAATTTGGCTCTACATTTGTATTTTAGATTAATGTTAATGAGGCAACAGAAG  
 AGGATGTACCTTTTTGAGGGTATTTTCATGCATATCTGCATGAAATATCTGCATATTACAGTTTAGAAATGAAAGTACT  
 TTGTCTAGTCGCTGAACACTTCTAAATGAATCCTGATAATGCCATGATTTCTTTTGAATGAATAGTGGTGTGAGTGAAGG  
 TTAGAGGCTATAACACCCAATAATGGGAGTTTAGCAACAACAAAAATGTGTGTTTGTGTGTGTGTGTGTGTGTGTGTGT  
 GTGTGTGTGTGTGTGTGGGGGGGGGGGGGGGGGGTGTCTTTGTGCCCTGTATCCTTCTCACATAATTTAACAATA  
 ATTCCTGATTATTCATAATCATGGTAGCATCCACGTTAATGTAGAAGTGTTCAGAAAATTTTTATATTTCTACTTACAAT  
 GAAAGTGACTCCAAAATGGCAATACATTTATTCACCAATCGACAACAGTATATCTTCTACTGCTACTTAAAGCTATTTTGA  
 CTCACATATACTGTACACTTGAATCTTAAATCCAACCCCTCAGATGTCACATGCTAAGCCATCTTTCCAGAACACTACA  
 ATTTTCTTTTCTTTTGTCAATACATCCATCTTACTGTGATGATTAATGCGTCAATTTTCTTTGATATCAGTTTCT  
 ATAAATTCGATGCCATGGTATTTGGGACATCAAATCTCTTCCAACCTTGAATTTTATGTGGCAGTGTGTCAAACCT  
 CTTGACCTTAAAGTAAACTGATACATTTTACGATTTTACTAGTCAATTTTAAACCATGCATGGCTTTTCTTTGAGACAG  
 ACAAACCAATTCATTCCTATCTCTTTTGTAGTAATGCTTCTTCCATTTTGTGGCAGAGATGTGATGAGTTGTTTTACTT  
 TTGTATTGAACATACTGTACATTTCCATACAACCTTTGTAAATGTTATGTGCCAATTTTACTGTCTTATTTACAATAT  
 CATTACATAATGATACCTTCTTATACATTTTTTTCCAATAAATGGGTCTTCTCTATCGGTATAATGGAATTTAGCTGT  
 AATATTTGTTCTGCCTCTTCTGGAGGGTGAATTTGGAATTTGAACCAACTCTGTATGGCTTCATTTAAAAGGAGGATAC



CAATTTAAAGGCAATGCTACCAAATACACTCCATTAGTATGTAACCTTCTGACCCACTGGGAATGTGATGAAAGAAATAA  
 AGCTGAAATAAATCATTTCTACTATTATTCTAACATTTTCACATTTCTTAAAATAAAGTGGTGATCCTAACTGACCTAAGA  
 CAGGGAATTTTGTACTAGGATTAATGTGAGGAATTTGAAAAACGGAGTTAAATGTATATGGCTAAGGTGTATGTAA  
 CTTCTGACTTCAACTGTATGTAATGTATTTCTATAAATGTTCTTCTGGGATGGAAGTATGCTGTCATGGATGCTTTTCA  
 TGCGGTTTTTCAAATGTCAGGCCATGATCAAAGGTAACACAAGCTATTTTTAACAACAATTTGAGAGAGTTCTGACATGTTT  
 ATAAGCTTGTATGACCAAGAGAATCATGAGGCTATCATCTGCACAGCATGCAGGGCAAGGAAAATACATGTGTTTATTG  
 ATAACATTTCCAATGAGTAACGCAAAGGACATTTTAGAGCAGAATCTTGAATGCCAAATTTGTCATCTAGTTGGACAAAG  
 GAATGCTTCTCAGCCAATTTGTCAGCTCAAATGTGATGACTCACTTGTGATAAACGTGAGATTCTTGTGATTTCTGCCT  
 TCAATGTAAGCTCCCTTTTCTACTGACTTCTCCAGGGCAATGGCATCTTTCTCAAGGCATTGCCTCTGGTCTTTATTT  
 CAGCAATTAGGCCAGACACACTGAGACACACAAATACGGATGGAATCGTACATGACGTACATCATTTGCCGTCAAAAG  
 TACAACCTCAAGACAACATATTTTCAGACGATTCGCCGCCATCAAAGATGGACCATCTCATTTCGTTAATGATGACTCCTA  
 TTGGAAAAGCATTGGTTTCATCTCAAATACTCAGACACAAAATACTCAGACAACAGTGTGTAGCCAATTTCTGGTGGCAAT  
 ATCTGAACTGTCCAGCAATGTTTTTGTGCTCCAGGAGAAAATAGTTTCTCAATGATGCAAGAGCCCACATGTACCCAG  
 CAGACCCGATGCTGACCTCCATAATGATCTGTCCATCCACCTGCACAGTGGTGTAAAGTACTTAAAGTAAATATGCTT  
 TAAAGTACTACTTCAGTCGTTTTTGGGGGTATCTGTACTTTACTATTTATATTTTTGGACAACCTTTTATTTTTACTTCACT  
 ACACTCCTAAAGAATACGATGTACTTTTTACTCCGTACATTTTACCTGACACCTAAAAGTACTCGTTACATTTTGAATGC  
 TTAGCTGGACAGAAAATTTGTCAAAATTCACACACTTATCAACAGAACACGCTGGTCACTCTACTGCCTGATCTGCTGGC  
 GGACTCACTGAACACAAATGCTTTATTTGCAAAGTGAAGTGTGTTGTTGTTGAGTATCTGGCTATCTGTAATAATAAAAAACA  
 CATTGTGCCATCTGGTTTTTATAAGGAATTTGAAATTTATTTATACTTTTACTTTTGATACTTAAAGTATAATTTAGCAACA  
 TTTAATGTTGATACTTAAAGTATAAAAAACAAATACTTTTAGACTTTTACCAAAGTAATATTTTACTGGGTGACTCACTTT  
 TTTCTATTAATGAGCTTTACTTTTACTCAAGTTTTGACAATTTGGGTACTTATTCCACCACTGCACCTACATGAAGAATGA  
 CTTCCATGTTATGTTGCAATCACTTCCAGTGTGTTTTGCTTCAATGTTCCGTACTGTGAAAATCATGGGTTTCTGTGT  
 CAGTCACTTATCTCAGAGCAGTGGTCCCTCTCAGACTGGTGTGAATAATGCATATGCAGCTATAGGGGGCCTCGACA  
 GGGCCGTATTAATAATGATATAGTCAACACAGAAGTGTGACACAACCTTACCACCAAAAACATCCTCACCCCTGTACCCCT  
 ACCCATAGTCAACCCACCAAATTCCTCAAGGAATATACTAGTATGTATAATATATATATCTCTCTTTTAAATTACAAT  
 TTTATTTTCCATCCTTCTGTCTCTTTTTCCACTTTTACTCCTTGTACACCCGTTCTTGTCTCCTCACCTCTTCATTTCCG  
 TCTCTCTCCCTGGCATTTCCACTTCTCCCTCCTTCCCTTTTCGCCCTCTGTCTTTCCCCAGCCACATGCTCAGATGGAT  
 TCTTCAGTCACTAGACTGGAAGTGGTGGGCTCTCGGAGAAGCCTTGAAGTGAAGAGAGAGAGAGAGAGAGAGAGAGAGG  
 GGGTGGAGGGGCTGCGCCGAACAGAGGTTGGGTGAGACATCACAGAGAGAGAGAGAGAGAGAGAGAGAGAGAGAGG  
 TGATATGTGACAGGATGTGGTTTTCCCTGAGCTTGCATACATAGCCGATGCATACTTTGACACTTAAACAGCAGCAGC  
 CTCTTAGTGTGTTGCTGCGCACGGTTAGCTAGTGTCTAGCGAGGATAGAAACAAGCCGGCAGAGCTACTGATCCCATCCAGA  
 TTTGTGTCTTCTCGCTGTCTTTTTTCCCCTCTTTGACCTGAAAGCCTCAGTTAGAGCTGTATCGGCAGGACCTGAGTGA  
 AGAATCGCAGAGGATCTGAGCGTGGACTGTTGCGCTGTCTCCTGTGCTAGAGTGTGTGTGTTGTTGAGGAGCCGTT  
 CCAGTGGCTTTCTCTGATCTCAATAGCGAAGCTTTCCAACCTCCTGTAGTCAACAGCTTCTGATCAGGTAACCTCCTCTTC  
 TTTCTACTTTAACTTGCATGTGTTTACCGCTAGTCTACATCCTTATTTCTTAAAGGCTTGAAGAAAATAAATATGTAGCCGA  
 TAGGAAAAGACACTGATAAAGACAGACTGTACAACCTTTGGACAGAAGTACAGACAACCTAGTGTCTAGTTGTTTAT  
 AGCGTAAACCCGTTCAAGGACAGATTAATGAGGATGCTGTATCAAGGATGCCACAAGTTGGCTTGTGTGCA  
 TGTCTTACAAGAACTCCTGATCACCAACCCACACTCCTCCTATACACACACACACATAAAACCCCGTTTCATGCTCAG  
 AGCAGTAATCATGCAGATCAATGAGCTGGTTGGTTTGAAGTACATGTGCGGCACCAGAGGGGTGAGAAATGCCAGAAATG  
 TCTACTGGCTCCAATCACTGAACCCTGATGGTAATCAAGATGTGCTTGACATACAGTATTTAACCTTAGCCTCTACTG  
 GAGAGAGAGAGTGAAGTGTGTTGCCAGTGTGAGGGAGGGACAAAGTGAAGGATGTGAGAAGGGATAAGAGGT  
 TGGGAGAAAAGAGGGCATGAGAGAAATGCACACAGACAGGAAGAGTAAGAAGGAATGAGAGAGAGAGAGAGAGAGAGG  
 GAGGAGGGAGTGAAGAGAGAGAGAGAGGAGGGAGTGAAGAGAGAGAGAGAGTCTGTGAGTGTGTTGAGTGAAT  
 GTTAACTATTACCAGCTGGTGGGTTGAGGGCTGGGCTGTAAACCCCTTTATTGTTGCTGGGTACAGCAGTACACAC  
 ACACACACACACACACACACAGGAAAACACTTTTACCAGGAACCCCAAATTTACTGCATCAGACTAGCCACAACC  
 CAAATATAACTTGCCAGCTCTGAATGGGAAAGTCAATGTGGTAAATGCTCCATACTGTAGGCCTAATTTGAAACAGAAAA  
 TAATAGATGGGGCAAAGGTGAAGCGAGGGAGCCGGAGCAGAAACAGCTTCATGATATAGTTACGTTGTACATTTGAATA  
 CTCGCTGATATAATCTATAAGGCTACATAGTAGGAACTCACTATTGTGTGATTCATAAAGTTGTTTCATGTTTACAGAA  
 TTTCTGAAAATGACTTCACTGCTCCAGCTGCGTTGAAGTTCAAACCTTCCATTTTAAATCCAGTTCCTCATAGTTTGTCTAC  
 CGGACCAAGGTGTATAGATTTCTCTGCTACTGAGTTGAATTTGAATTTGAATTTGCTTGAATTTGAGAGTCTTGTCT  
 TGATTTTAAACCTTCAATGATGTTCTACTCTCCACAGCATGTACAGTGCAAAACATTCACAGAGGGAAAAGGGAAAACGTT  
 GACCACTAGTCTACAAGTTTACTGCATTTTACAGTAAAGTACTTGAACCTAGTTCTATCTCCAATAAAAACATAGTTTAA  
 ACAAGAACCAAAACTGAGAATTACTGAAATAATATTTCCATATTGAAAGATTCTACACACACAATCCCACACATACCGTA  
 TTTATCCCTATGTGCTCCCTACAAGTACCTACCCACTGTATTTTAGGCCTTTTGGGTAAACAGCTTAGCCTGATTACTT  
 GCTGAAAAGATGACAGGTAATCTTTGCACTTCTCCTGACAGCGATGACAGTCTAAGTGGATTATACTCTTGCAATAAGCAT  
 CACATCTATATCTTTGAAATGCTTGGGTACATGATCTGTGGCAAGATTGTTCCCTTTTCTTTCTTTAGGGATGAGCTT  
 TTGAAGAGACCAATTTATTCAAGCCTTTGGCATAGCCTTAAATGACTAAGAATGGATATTAAGAGAAGTCCCTTTGCTAG  
 AAGGAAAACATGGTGGTATCCAGTATTTCACTTGTTTTGCAGTGGCTAAGCGAGGAAGAAAACCTCCCTTTGATACTGTAT  
 TTCTCAAAGGAAAATGACTGGGTGGTCAAGAATTCAGCAGTATTGATCAAGTGTGTTCAAGGACTTGTGATACTGT  
 ATCTGAAAAGCAAACTTTGGCTTCAGTTGGCTGTAAATAAAAAAAATGCCCTGCCCTCAGAAAAGTTCCGATGAAAACCAA  
 TGAATCGTTCTTGAATCTTTATCCCTATGTTTTGAGAAAATAGAATATGACCAAATAATTCATGTTTCTATTATCAACC  
 GCGGTTCTCTTTCACATAGTTATTTTCTTCTGCTGTGCTGATTTCACTTTGGCCATGATCGGACTCATCATTGCT  
 TATGTTTACCAGGATAGATTGAAAATGTGTTGAGTTCAGAGTATTGATAAAGCCCGTGTGAATAGATCAGATTATAC  
 ATACTTTTATCAAGATAATGACTGTCAAACACAGCAAATGCAAAAATACAGAAGTGAAGTCAAGGATGGGAGGAAATTAG  
 AGAGAAGACCTTACAGGCAGTGAAGAAAAGAGAAGGGAGAAGGGAGAGATGAGAGCTTAGCCCTGGAGAGAGGAAAATA  
 GAGATATTGGTGTCTATTATTTCTCTGAGAGGGGAAGTGTCTAAAGGGGCTGGTCCCATGGCAATAGCTCCCTACAG  
 TATGTGTGTCTGGGTGCAGCATGTGTAGCCGGCTGTGCCAGGCCTTGAAGCACTGGAGAGGCTCAAGCAGACGCTTGT  
 TACTACGC  
 TCTGTTTTTACCAGCACTTATCTCCCTCATCTTTAGCAAGGCTCTTTCTTTATATGTGTGTCATTATGTCCTTGTCTTGG

AGATTTC AATTGAATGTAATAAACTGTGTCTAGCTGTGGGTTTTCAA AAAAGCTATTCAGT TTTTCAGAGAAGGCCAGT  
 ATTTGGGAATACGTTATAGGTCATGTTTTTCATCTTA ACTACAGGGCTTTCAAGCTATGTAATATTAGCACTGGTCTAATT  
 GTTTTTGTGTGTAGTATGGTCACCAACAACCTAAATCCCAGCCACCTCTGTTTTCTCTGTTGGGCCCTTGCT  
 CCTATCCTCCTGTCTACTGTCCCAGGTGAGGAGCCAAGGAAGGATGTCCAAACAGGGAATGCCCTTCTCCG  
 GGCCCTGAGAGCACTCTCCCTCCTGAGTGGACAACAACAGCTGCCAGGAACTGTGCCTTGTGCAAGAAGTCTTTA  
 TTTGTACATTGAAGAACCGGTGTAATCGGAGTTAATGTGGTAGACACAGGCAGAAAGTCCGGGGCAGAGACGGGGGCAA  
 TGTAAGAGATGGCCGTGTTTTAAAGAGCGACTGCCCTGAAAAGCAACTTGAAAAGTCCATGTGGCATCGATGGGAGT  
 CAAACATTTATTTGATGTGAAAATGACTACAAAGTGAATGGGATCATTTTGGTCGTAAAGTCAGTCTCGTCCAAAA  
 CAGAGATTTGTGAGATGATAGGAAAAAATGGTACGTCATGGAATGAAGGGTACTGTCAATCTCCTTTGGGTTGGATACA  
 TTTCAACCTGCCACAGCTGGCAGCACCAAGTAATCATCATTTTGAGGCACAGTCGATGTGATCTGATCGTAATGCC  
 CTTGGTCAATTTGGTTGACGTTTCGATATCCCTATGGGCTAGTTAGGACCCGTAGTAAATACCCAATTTACTGTACA  
 TGGGACAATATTTTAAAATGTCAACTATACATTTTAAAAATACAAAAATTGAAAGCATTTAATGAGAATAAAAATTTTG  
 CAACATTAATAATTTGTAACATTTGCATTGCGTAAGTTATTGACAGTCCCTAACTAGCCCAGAGCTAGGCTGTCCAATG  
 TCAACTTTGCCACAGTTGCAAACAGCCGGCTGAAGCTAATTGGCGAAAGAAGTTAGCTAGCACTAGCTAGCCTAGGCGA  
 CTTCAAGACAGAAGACCTGATTAGACTATTTCAAGTTATTTAGACGGATGAGTGACTAACTGTGCAGTGT TTTGGCAGAG  
 TGAATGTACATAAACTTGCCACATGCGAACAAACAGAAAGAGACACCCCCCAAGACAACCTCTGTTTGCCTTCACTGC  
 ATTTCTTAATGACCAGCTGAAAAACAAGGCCAAATCAGGAAGTTACGCCCCCTTTAAGTTTGGAGATGGCTAATCTT  
 CCTCAAATCCAGTGGTCACCAACCTTTTCTGAGTCAAGTCACTTTCTAAGTCAAAAATACAAGCCGAGATCTACCCTCA  
 GATTATTTTTTTTTTAAAACATGACTTAAATAATGTAAGCCTATGCAACATTACCCAATTA AAAACAGTCTCTGAGCATCGA  
 GTTTTGTGCAGTAAGCTATAGGCCCAATACATTTGCTACTGCATATTGGCTATGCTTGAATTACCCTGCCAATGTTGTTCT  
 TCTCAGACCATTTTGAATGATATTTAAAATTAGGTATATGATCACACTGGTAGTAGATCATTTGTTGTGTTACTTATGA  
 GGCACAGCAAAGTGAGCATGATCATTTGTTTATATTTTAAATATTTTTTAAATTA CTGGACTGAAGGTCAGTCAAAGGG  
 GAGGGAGGGAAGGAGCAGCGGTGATGCTGCCTCACCCGACTCATCGACCTCTGCTCCATCCCTCCACTGAGAAAAGGA  
 GACAGTCTTCCAGCTGATGGCGAAAACCTCAAGTCCACACTGCATTATTTTTGCCTCATACACCAATTCATGTTATCTTAT  
 GACCAGAGAAAAGTGAATATTTCCCTCGTATTA AAAACGCAAGCCGCTAATAATAACAACAAGCTTATTGGAACACTTT  
 TCTAACATTATACTCATTCAATTGCAGCTGCAGTGTGGTTGTAGCATGAGTGGAAGTATGGAACACGCGCATGTGACAAA  
 AGTGTGAAACAAAGTTTTGACAGTGTGAATAAACATGAACCTTAGTCAGCAGCTCTTTGCTGTATTTGTTGGTTTTGAAA  
 GTTTTGAAATCTCAAGAGTACCAACTTTGCTGCTTGTTCGAGGCTTCTTTTTACAGTCTATGGCTCGAGGAAACTGTGCA  
 GACACGGTTATCTGAGTACTGTGATTGGTCAGCGATTAGGCTATAGGTCAGTGTGATTTCTACCTCAGACTTCCCGGC  
 ACTAGGCTGTCTGAATCACTGTGCGCTACCGGCAACGCGCAAAAACACATGTAGAAAAATAGGAACACAAGGCTTTAGTG  
 TTGGTCTTTTTACAGAAATGTTTGGTGATCAACTTAGAATCCGATCGACCGGTTGGTGACCAGTCTCTAATCCTTTCTT  
 GTCCAAAAGAGATCTTTTCATAACAAGCTGAGCTTTGCTCAAGATTTGTATCTTTATATGACACTTCCAAGAAGACAAA  
 TTATTTTATTATTAGATAGCATTATGAAAGACAATGAATCATCACTCTTGTATTTTGTGACCATATTTGGCAATATC  
 CAACCAAATAGTTTTTTACAGAATCATACATATTATAGCTCATGTAAGATGTTTCCCTCCCATGCAGATATAACATAAAA  
 TCCTGTGCTAAGCAACTGTGGAGAAGCTGGTGGTTATGAAGGATGTTTAACTATTGAATTTGATATTTATTAAGGATCCA  
 TCTTAGCTGTCTTGGCAGCAGTTACTCTTCCCTGGGCTCCAGCCATTAAGACAACATACATAGTAAAAAATAC  
 ATTTTCATAACACTTTACCCAATACATTTAGTGTGTTTCTCTCAGCCAGTGTCCACTATACATATTTACAATAACA  
 TCCATGTGTACATGAAAAGTATCTTTGTGAGGCTGAAATTTGGGTAGAAGATACAAAATAGGTCCGTTT TAGGAACCAAACAG  
 GTTCATGGCTAACAAACGTGACCTTCTACACTGAACAAAAATATAAATAACAACATGTAAAGTGTGGTCCCATGTTTCAT  
 GAGCTGAAATAAAAATATCCTAGAAATGTTCCATACGCACAAAAGCTTATTTCCCTGTAGTGAGTGT TATCCTTTGCT  
 AAGATAATCCATCCACCTGACAGGTGTGACATATCAAGAAGCTGATCAAACAGCATGATCATTACACAGGTGCACCTTGT  
 GCTGGGGACAATAAAAAGGCCACTCTAAAATGTGCAGTTTTGTGCACAAACAATGCCACAGATGTCTCAAGTTTTTTAGG  
 GAGTGTGCAATTTGGCTTGTGACTGCAGAAATGTCCACCAGAGCTGTTGCCAGATAATTGAATGTTTCTCTTTCCGT  
 AAGCCGCTCAATGTCTTTTTATAGAATTTGGCAGTACGTTCCACCCGCTCACAACCCGACAGACATTTGTAACCAGCC  
 AGCCAGGACCTCCACATCCGGCTTCTTTGTATCAAAATTTTATTTGTACATGCGCCGAAGGTGTAGATCAGGGGTGGGA  
 AACTTCAGGCCTCGGGGGCTGATTTGGTGTACACTTTTTCCACCTCCATAGCAAACGCAGCTGATTTAATCAAATGCA  
 TTCTAAATGAAGATCATGATTAGGTGATTACTGGAATCAGGTGTGTAGCTGGGCCCTGGGGCAAACCTGTGACACAAAT  
 CAGGCCCTCGAGGACTGGACCCTGGTGTAGACCTTACTGTGCAATGTTTACTTACAAGACCTTAACCAACAATGCATGGT  
 CTGAGACCCAGCCACCCGGACAGCTGATGAAACTGTTGGTTTGCATAACCAATAAATTTCTGCTCAAACCTGTGCAAAACCG  
 TCTCAGGGAAGCTCAACTGCGTGCACATCTTCTCAGCAGGCTTGAACCTGACTGCAGTGGGCACTCTCACCATCGA  
 TAGCCACTGGCATGCTGGAGAAGTGTGCTCTTTGTGGATGAATCCCGGTTTCAACTGTACCGGGCAGTTGGCAGTATGGC  
 GTGGTGTGAGCCAGCGATATTTGCTGATGTCAACGTTGTGATCAGAGTGTCCAATGATGGAGGTGGGGTTATGGTATAGG  
 CAGGCATAAGCTACGGACAATGAACACAATTGCATTTTATCGATGGCAATTTGAATGCACAGAGGTACGGTACAAGATC  
 CCAAGGCCCATTTGCTGTCATATATCTGCCGCCATCACTCCAATTAATTTATGGTCTGCATACTCACCAGACATGTCAC  
 CCATTTAGCATGTTTGGGATGCTCTGGATCGACATTTACCACAGCGTGTCCAGACCACAATCAACAGCCTGATCAACTC  
 TATGCCAAGGAGATGCGCTGTATGAAAACAATGGTGTACACCATAATAATGACTGGTTTTCTGATCCACGCCCTATCT  
 TTTTTTTATTAAGTATCTGTGACCAACAGATGCATATGTATTTCCCGTCAATGTGAAATCCATAGTTAGGGCCCTAATGA  
 ATTTATTTTAGTTGACTGATTTCCCTACATGAACGTGAAAATCATGAAATTTGTTGCAGGTTGCGTTTTATATTTGTTCA  
 GTATAATCTGTCTATAAAAAGTACAACCTGTAACAACAACCCCTTTGACTTCTAACATCTTGCTTACAAGTCTTAT  
 CGAGTAAAACCTCAAATGACATTAACCTCAAACAAGAAAGAAAGAAACGGTGAACCGATCGTTACTAATTCAGCAAAG  
 GATCAATGCCTTTCTGTTTTTCTGTTTAGACTGTTGGTGTAAACCAAACTCCCTCGCTGTGAGTCTAAAACCTCAGAGGAG  
 ATTAACCAAAACGGCCCTGTGGAGTCAGAGCTCAGACAGCGTGTCCAGAACATGCACCTCGACTCTGAGGAGAAGTTT  
 GAGAGGAAAACGCTCACTCTGAAAATCATAAACATCAGACTTCCGCTGTCAACTTAAAAATACCCGCGCTCGCTC  
 GCTCCCCCGCTCGGCTCCAGGACTATACAAAATAAGAGCCCTCCGTTTTTCTAAAATGTTTCAAGCCATTTGTTTTCTC  
 TCTTATACTTTTGTTCAGACTTCTGCCTCTCCTGTACACTACATCGTGGAGCCTCTCTCCGGAGTTCACTGGAACCTAAA  
 CAGAGCAGACATCTGAGGTGAAAGAGAGAATATTA AAAACTATGGATATTTTACTGTAGTATTTGCTGTTTTCTTT  
 GATGACAGAAAATGTTGATGTCATTGAGCCGAGTTGCTTTAGTCCAGTCTGGGGGGCTGTTTAGGAGAAATGAAACAC  
 TTTTAGGGAAATGGAAGATCAGTTTTTTGTTGTTGTTCTTTTGGCTTTGAAATGTGTGCTCTTGATTTGAGAAGTGGG  
 CAGAAATACACAATTTCCAGAGATGACTCACTGAGCTCATTTTTAAACATTTAAATCCAATTTTAAAACGCTTTGAAA



CATATTTTCAAAAATACAAAACATCAGATCCTGTTCCTTGTATTCACTGGCGTACTACACGCCCTGCAGCCCCGCAAGG  
 CAGGTCATAAGCCATGGCAAAATGGTTTGAAGATGACAGGAAATAAGCTGTA AAAACTGCTGAATTTCTGACTCATGGCAA  
 AATGTGTAGAATAGCAGGACATTTGCTTAAAAAATGCTAAATTTCTCTCAGCCTCATTGCAACATTTGTAGAATAGTATGA  
 GATGGTCTATAAAAATGCAGTATGCGCTGCTTGTATTGACTTGAAAGCCATTGGCTTGTAAATGTTATAAATATACATTT  
 TATGCACACTCATGAAATGATCAAAAAGAGACATGAAGATTATAGATGATATGCACATTTTCGTTCCATAATACAAAAC  
 GGATATCTATGTAGGTGTGTGCATGAGAGCCACTGTCTCCACAACACGTTTGAATCTCTGCCATCTCCCCCTTCTTGTC  
 ACTTCTATTCAACAGGGTCTAATTACAGTGGCCTCTCTCTCCAGACTCTACTTGCCATGCATTACCTAACTCGTCTCTCT  
 AACGAACAATCTCCAACCCGCTACCCATTTCTCTTTTTCCCTTGATGATTCTCACCTTTTTATTCTCTCTGCTCACCT  
 CATTAACAGAGCACCGGTTACCCCCCCCCCCCCANNNNNNNNNNNNNNNNNNNNNNNNNNNNNNNNNNNNNNNNNNNNN  
 NNNNNNNNNNNNNNNNNNNNNNNNNNNNNNNNNNNNNNNNNNNNNNNNNNNNNNNNNNNNNNNNNNNNNNNNNNNNN  
 CCCCCCCCCCCCCCTCTATCTC  
 CACCACGGCCTCTTGATTAGTACGAGCGGAGCCGGAACCGTGTATAATTAGAGGGGAACATAATAAAGTGCCTTCC  
 TCATCAGCTGGGGGGCCGTTGCCCTGGACCACCTCCCACCCTCCCGGGTTAATCAGCAGAGTACAATGGGATATTA  
 CCTGTGCCAGCCTGAGCAATGGAGATGCAGCACCCTGTCAAGCAATTTGGGTGACGCCCGGTGCACAGGCTCTTTA  
 GAGGCTCTTTCCCGTAGTCTTTTCATGGTTGTCTCTGTTAATTTGTCCCCAGGGAAAGAGGGCTCCGGAACCCATGAAAA  
 ATCAAGCTCATTATGCCCCTTTTTATTTATTTATTTATTTATTTGGAGCCACTTATCCAGCATGTTTTTCTTTATTGGTT  
 TTCCCTCTGAGACTCCCTTGGGGCCCCGTACGTGAGGGGTGTGTGTGTGATCGAGAGATTAATCCATCTCTCCCTAAAT  
 GGACATGTTCTATGCTTTGGGACTGGTGTCCAGTTTACACACACACAGGGTATCAGGTAGCCTAGCATTAGAGCATTTG  
 GGCTAGTAACCAAAAGGTTGCTAGTTTAAATCTGAGCCCAAGGTGATAGCAGACCTGGCCATGACCCCACTCTTCGA  
 GGGTGTCTCAGGGGGAGTTGGGATATGCAAAAAACACATTTCCAATTCACACGTGTATTAATTAACACTAGTACATGTG  
 TGAATAGGACAAATATAAGAACCACATTATTAATATATTGTTATTTATTTATTTACACACATACACACACACACACA  
 CACACACACACACACACACACACACACACACACACACACACACACACAGATTCTTACAGAACCTCATTCTGCCCA  
 TCTATTTCCCTATGTAGGGTCCATACACACTCTGGGGAGATGGGCTGTGGACTGAGGAAGCTGAAGCCATCCGAGGAGAGC  
 AGTCCAGGGAAGATCTACTCCACCCTGAAGAGACCACAGGTGGAGACCAAGTTGGCGTAGCCTACACATACCAATAACGT  
 TGACTTTCCCTCGTAGGAAAGCGGTAGACATGCAACTTTTCAGAGAATTTACTGGTTATTTTCAAGCCATTTGAAAAATG  
 TATTAGTCACTGTTACAGTAAGAATACAAAATTATAATGTTCTCCAACCTCTCTTTTTTACACACCAAAGATATCCCTAACT  
 ATCATATTTATAGGGTGGCAGGTAGCCTAGTGGTTAGAGCATTGGGCCAGTAAACGAAAGGTTGCTAGATCGAATCCCC  
 GAGCTGACAAGGTACAAATCTGTGCTTCTGCCCTGAACAAGGCAGTTAACCCACTGTTCCCTAGGCCGTATTGTAATA  
 AGGATTTGTTCTTAACTGACTTGCTACTTAAATAAAGGTAAAAAATAATATATATTTGTTTAAAGTTCAGTACCAGAC  
 AAAAACTGACAAACACAGAACACGTTCTCCACCCTCACATCGTTAGATGGAAATACATTTCCCCACCATAATAGACTC  
 CCTCACACACACACAGAGCCCTTTCTTGTGCAATTTGAGGTGTTTATGAGATGCAAGGTGGTGTATGCTTCC  
 TGAGACCTGCTCTGCTCATTGCTCAGGGGCGGGACCTATGGAAGCTGGGGCTAAATATAGGCATCACTTTTATTTCCCTT  
 CAAGAGAAGTTACAGTTCAAACAGTATGAATGGGGGTGGGCTGGTGGGAGATGCAGTCTCTGGAGCTGGGAGAAGCTGG  
 GAGATGTAGTGTGCTGTGCGTGCCTGTGACAGTCCATTAGCGAGTCACTCTGACGGGGAGAGAATGGGTACTAAGATAC  
 ACCATCTGGGTGTCTGGGCTGTATGCGTGCCTCTCTCTCTTTCTGTCTCTCCCCTGCTCTTGTCTCTCCACTGTG  
 TCTGTCACTCTCTCTGCTCTTTCTCAGTTCTCTGCTCGCTCTTTTTTTTTAAAGCTGTGCTGTTTGTCTCTTAGGACT  
 ATATTGAGTCTGTAGTTGCGTCCCTGTAGTGTTTGGGACTGCTGAAAAATCCTTACATTACCGAAACAGTTTCCAGGGT  
 AACTGTTGGGGATAACTTACTGTATTGTAATTTGATGACACTGTTGACTAGGCTACAGGTAAGTTCCACTTGTCC  
 TGCCACTGTTAGTGTGTTTCTTAGAAAATACACAACATTTAATATGATCACAGAAGTGCCTATACTACTCATGGCTG  
 TATACTAACTAGCCTGTTTATTTCCAAGTTGTAATGTAAATGTGGCCTCTGTGTATCCAGGTTTCATGCTTTATTGTTCT  
 AAAAAGTGTTTTGGTCTCAGCAACAGGCTCTAACAAAATCTTTCAACTAATCAAATCGTTTATAGATAACTATGAGAATTG  
 AGGAGAAAATTAGGACATTAGGAAGATGTAATGTTCTTGTGTTATTTGTTTCCAATCATGTCCATAGCTCAATGTATCTC  
 TAAAAAGTGTAGCATATAGCGCCCGCAGTTACTTTTAGGGGGTTTTACATATGAAATTTGGTACCCTGGTTCGGTGTCC  
 TGGAGCATTTGGTAAGAGTTCTACAGAATGCGTTTTGCTTTTCAACAAGCCTGAAAAAACAAGTTTCAAGATGCACATTTT  
 ACATAACGTTAGCGAAGTGTGCTAACCGGTGTGGAAAGAACCCATCTACACAACTCACGCTGCCGTGCCATATCTGA  
 TACTCTGGTCTGGGCTTGGACCCGCTACTCACACAGGTCCAGGATCTTTTGGGTTTACACATGCTTTATAGCGCGGA  
 TCAGGATACCAATGCTCCAGAATCAGGATAATAAGGGATATGTGAAGCGGCCCTTAGATAAATGACCAATGATAGG  
 GGGCCATGTTGAACCACATAAAGACCCGACCAAGATATGAAGAGCAATGTGTATGAGCTTTAATAAACTGCCACTGTA  
 AATACCAGGCAGCCTTAGCTAGCAAGCTATAACCCCATGTTTTATGTCAAGTTTATGACACATTCACGAACACGGCCAT  
 GTTGTACATTTCACTTACCTCAGAAAATGGCTTTGAAACAGAGAATGATTTGATATTAACCACTGACCCCATAGGGAA  
 AGGATAAGCCGAGGCTGTGCTAACCGGTGTGGAAAGAACCCATCTACCGTACATACAGAGAAAGGTTTCGGAGTGTCT  
 TGGCACGTATTTTTATTTCCAAAATGTGATTTCAAATTTAAAATGTCAAGAGGATGAAAAATGAAAAACACACTTATG  
 TTAGTCTTGAATCAAATCCAGCTGACAGACACACACGACACACACACACTTTGATTTTCACTCTGGCTCCAGACACATT  
 ATTTATATGCAAAACCCAGAGCCTGAAGTCTCTTGTAAATATAAGCTTTTCTCACCGCTCCGTGTGACTGACGTGTA  
 GAAGCAGCGGCTTCCGCTGTGCTCTGATCGGAAGCAGGAATATGGAGCAGGAAATGAGAGGTGAGTGAATTTTTTGA  
 ACACCGTAGTGTGTTCTGAGTGGAGATTAACCCCTGGATGTGGGAGCCAGAATTTATCCAGTTTCAACTCCGAGAGG  
 GAGAATTAACCCCGGTCGGTCTCGGGAAACGACATTAAGTGAATTCACGGTCACTCAGGTTTATACATGATGATTTCA  
 TTATATTCTCACTGCATGGGTGAGGTGTTGATGCTCGATTCCATCAACATATTTGTTTATAATGTAGAAAACAGAAAA  
 GACACGCTTAGGGTAGAAGTTGACACCAACCACAGATCTAGGATCAGATGACTTTATACCCCTAACCGTAACATTAGAG  
 GTATAACAAATGAATGAGCCTGTAGGCCTAATGATTTATGGATATTTTCTATTCCAAGACATGCACATGTAGGATGCACAT  
 CCGCTTAAAGTGTGAATGTAGATGATAGCGATGGAACCTCTGGTGTAAATGGTCCGATTAGCATACTCTATCAATCAA  
 TGAACCACGGATGGCTTTGGGTAGCAAGTTGAATCTCGGTAACCAATACACTGAGTGTACGAAACATGAAGAACACCTT  
 CTTAATATTTGATTTGACCCCTGTTGCCCTCAGAACAGCTTCAACTCAGCGGGGCATGGACTCTACAAGGTGTGCGAA  
 GTGTTCCACAGGATGCTGGCCATGTTGATGCAATGCTTCCACAGTGTGTCAAGTTGGCTGGATGCTTTGGGTG  
 GTGGAACTTTGATCCACACAGGAACTGTTGAGCATGAAAAACCCAGCAGCTTGCAGTTCTTGACGCAAAACCGGTG  
 CGCTTGCACCTACTACATAGCCGTTTATAGGCACTTAAATATTTTGTCTAGCCCATTAACCTCTGAATGGCACACA  
 TACACAAATCCATGTCTCAGTTGTCTCAAGGCTTTAAAATCCCTATTTAACCTGTCACTCCCTTAATCTACACTGATTG  
 AAGTGATTTAACAATTTGCAAAATTAAGGGATCATAGCATTACCTGGTCACTATGTATGGAAGAGCAGGTTGTT  
 CATAATGTTTTGTACTCAGTGTATGTCATAAACTGTAAGTTTAACTATTCTGTAATACTTACATGTAAAATACCTTT  
 TGAGGTTTCTCGACACAGGAGGCATAAGTGTACAGGTGTCATACAGCAACAGATGATTGCTACTATGTAGTGTGAATG



ATTTTCCCTCCATCAAGTCGCCGAGCGCCTTTTCATTTAGCCGTCGTAACGTACAGAGTTTAGACATTTAAAGAGGGTGC  
 TTTTGATTAACCTCTTTGTGCTTTTCCACTCTTTTATAGGCTTATGTGTGGTTGTGCTGAGATTGAAAGTAGCAGGGGATG  
 CATATGTACATGGTGATCTACAGATGGACGCTTAAATGCATGTCTAGACTTAAAAGTACAATTAATGAGCATTTTTCAG  
 AGTCTTGGAGACTCTAGCTAGTCAACGACACACTAAACCTAAGCTCCTCATCGATTATGCTGCTTCAGACGGGTC  
 CAGTCTCTTGATGACCGCCTCCTCTCTCATGATGCAGTCTGTTACGGTGCCACCGTGTAAAGCTGCCATAAGACTGACAT  
 AACCTGTAACAACATCTAGCAGGCTAGCAGTACTCTTCTCCCTCTGGAACATGACCCCTGGCAGTAGTTCAGTTTTAA  
 ATGATTAGAATGTGTATCTGTATCTGAGAAGGGAACAGGAGCAGCTTGTCTCCAGGTTATCTCCACTTCGCTGGAGCA  
 CAAGGTGTGAATGCCGTGTGTGTGCGCGTGAGCGAGCGAGCGCTACGTGTGTGCGTGTCTGTCTCTGCTGTGTGT  
 TTGAGAGATTGTGTGCTTACCTTGGATGGTGTGCCTAAGTCTTAGAGAGTGTGCATTTTGTCTTACCTCTGAGCGAGTGG  
 CGGCCAATGCATGGCACCAGCAGGCCCTCTCACAATGACTCATTAGTTAGGTAATTAAGGCGCAAGGCTGTGCCCGGGG  
 CTCACGCGCGGAGCCTGTGAGCTAGGACTGCTAATGATACTGCTAGGCCAGAGCAGAGTGATGTAGGAAAAGTATGGT  
 CCATAGGTTCTGCTCTCAACAACGGAGGGTGGTGGGGGGAAGAAAGGAGGAGAGGTGCGGACAGGGGACCTGTGCGCATT  
 TTCATTTATGCGTCTATGAAAGCTAATGGCACAGGGCAGGGCCTGGAGAGGGGAGACGGGTCCAGAGGTTGTGCTCAGTGG  
 AAAGAGGGTTTAGGGAGNNNNNNNNNNNNNNNNNNNNNNNNNNNNNNNNNNNNNNNNNNNNNNNNNNNNNNNNNNNNNN  
 NNNNNNNNNNNNNNNNNNNNNNNNNNNNNNNNNNNNNNNNNNNNNNNNNNNNNNNNNNNNNNNNNNNNNNNNNNN  
 TGCCGTAGACACCAGGTATTTCCACAATACACAACCATGTACTCCCGTTAGGGGAGAAGTAGAGAAAATAGTGAAGGGGTG  
 CGGGCTATTGTCAATTTTGGACACAGTGTACATTAGTCAATTGTGATTTGGATGACATATGTAGTATCTTAATCAAATTA  
 CAAGATGGGCGTCCCTTCTGTATGGTTCAGGATATATACTACAGTATGCATCTTGTGTTTGTGATGCAAAAACCA  
 CTTCCATAACCCTGAACCTAAAGCAGCTAACGTTTTTCAGTTGAATGATAATAATCTTCAAGTTGTTTGAATATGATATT  
 GTCATAAGCAAAATGAGTTATTAGTGTGGTAGGAAAATAAACAGCGCTTAAATTGTGATGAGGGAAAATGATGCTGAAC  
 AGCAGATATCAGGAAGAATGTTAATTTTTCCCTGAGTACTAATAGCTAATTTATTTCTGGGTCTATTTTTTTCACCATGC  
 TCAAAGGAATATCAATGTCTGCTTTTTTTTTTACCATCTACCAATATACGCCCTTGTGTTGCCAAGCATTTGAAAACCTC  
 CTGGTCTTTTGTGTTGAATCTGTGTTTGAATTCACCGTTCGACTGAGGGACCTTACAGATAATTTCCACTTTGACAGTA  
 TGGGTATTGTGTGTGGCCAGTGACAAAACTACATTTAATTTCAATTTAAAATTCAGGATGTAAGCAACAAAATGTG  
 AAAAGTCTAGGGGTGTGGATGGCCAGGTGAAATATACAGCCAGGTGAAATATACAGCGCATTACAGAAAGTATTCGGACC  
 CCTTTCCACATTTTGTACGTTACAGCCTTATTTCAAATGGATTAATTCATTTTTCTCATCAATCTACACACAATAC  
 ACAATAATGACAAAGCAAAAACAGGTTTTTGGACATTTTTGCAAATTGATAAATAAAAAACACTATCACATTTACACAA  
 GTACTCAGACCCCTTACTCAGTACTTTGTTGAAACACCTTTGACAGTATTACAGCCTTGAGTCTTCTTGGGTATGATGC  
 AACAAAGTTTGGCACACCTGTATTTGGCGAGTTTCTCCCATCTCTGCTGAGATCCTCTCAAGCTTTGTGAGTTGGATG  
 GGGAGTTCGCTGCACAGCTATTTTCAGGTCCTCCACAGAGATGTTTAGATCGGGTTCAAGTAAAATAAAAATTTTAT  
 TTTTCACATGCGCCGAATAACAACCGGTACAGACCTTTACCGTGAATGCTTACCAAGCCATGAGGTGAAAGGAATTTGCC  
 GTAGAGCTATTCAAGGACATTCAGAGACTTGTCCCGAAGCCACTCCTGTATTGTCTTGGCTGTGTGCTGAGGGTTGTGT  
 CCTGTGGAAGGTGAACCTTACCCAGTCTGAGGTCCAGAGTGTCTGAGCAGGTTTTCATCAAGGATCTCTCTGTAC  
 TTTGCTCCGTTTCATCTTCCCTCGATCCTAAGTGTCTCCAGTCCCTGCCGCTGAATAACATCCCCACAGCATGATGCT  
 GCCACCACCATGCTTACCGTAGGAATGGTGCACGTTCTCCAGACATGATGCTTGGCATTACAGGCCATAGGGTTCAAT  
 CTGGGTTTCATCAGACCAAGAATCTGTTTTTTCATGTTGAGAGTCCCTTTAGGTACCTTTTGGCAAACCTCAAGCAGG  
 CTGTGATGCCCTTTTACTGAGGAGTGGCTTCCATCTGGCCACTTACCACAAAGGCCATGATGGTGGAGTCCCGCAGAG  
 ATGGTTGTCTTCTGGAAGGTTCTCCCATCTCCACAGAGGAACCTCTGGAGCTCTGTGAGAGTGGCAACGGGTTCTTGGT  
 CACCTCCCTGACCTAGGCCCTTCTCCACGATTGCTCAGTTTGGCCGGGCGCCAGCTCTAGGAGGAGTCTTGGTGGTTC  
 CAACTTCTTTAATAATAAGAATGATGGATGCCACTTGGGGACCATCAATGCTGCAGAAATGTTTTGCTAACCTTCCCCAG  
 ATCTGTGCTTGGACAAATCCTGTCTCGGAGCTCTACGGACAATTTTCGACCTCATGGCTTGGTTTTGCTCTGACATT  
 CACTGTGAGTGTGGGACCTTATATGGACAGGTGTGTGCTTTCCAAATCATGTCCAATCAATTGAATTTACCACAGGTG  
 GACTCGTGTCAAGTTGTAGACACATCTCATGGATGATCAATGGAACAGGATGCACCTGAGCTCAATTTCAAGCCCTATA  
 GCAAAGGTCTGATACCTTATGTAATACGTTTTTTAATATACATTTGCAAAGATTTAATAACAAAAAATTTACTTGG  
 TCATTATGGAGTATTTGTGTAGATTGATGAGGATTTTATTATTTTAAATACATTTTAGAATAAGTCAAGGGGTCTGAA  
 TACTTTCCGAAAGCACTGTATATCACTATAATGGTTGTGTAGTAGGACCAAGATGATTGAAAAGTATTTGAACTTGT  
 TGGATCTGTACGCTCTGACCAGTATAGAGGATTATTTGTATTGTAGTTTGGTCCAGGACGTGGCAGAGGGTAGTTAGTT  
 TATGTATTCCGGGGTTTTGGGTTTCTTTCTATGGGTTTTCTATCTGTTCTGTTTCTATGTTAGTTAATTTGGGGTATGGA  
 CTCTCAATTTGAAGGCAAGTGTTTCTAGTTGCCTTTGATTTGGGAGTCCATATATTTAGGGTGTGTTTGGTCTTGTGTTT  
 GTGGTAGTTTGTAGCTGTATACGTGTGTAGCTGCTACTGTTTCTGCTGCGTGTGTTTTCTGTTTTGTTTTGTTTCT  
 GTGGTGTTCACATTTAATAAATTAATGATGAGCAGCAATCCGCTGCATATTGGTCCACTTGTCCGACAGCGATTTCAA  
 CATATCTTCTGACGAAGAGGAACGTGACAGGATCATCATGTTCTTGAGGATGACTCTCACACACAAGAAAATGCATTCAT  
 GTGGTCAATGTGAGGACGTTGCCATGTAAGAAGATCAACTAAACACATTTTTTTTTTAAATAGTATCCAACAGTTAAAC  
 TTATTTTACCTAATATGGCCTGTGTGTGAACATAACCTGGAGAAGCAGATCATTTTTTTTTTTTTTATTTCCACATTTTGT  
 TTTCTCCTCATTATTAATGGGAGTCTTTTTTTTTTGTGTTGGCTCTGTGCTAACAGAAATGTTACAGAAAACCAATTTAT  
 GCCTGTGAGCCAGGAGCCTTTTCTTATTATTTGTCAAGGATGATTTTCTTCTCTGTTTATGTAAAGTTAAAAA  
 AAATCTGGGTAACCAAAAAGGAAAAGTAATGGCTTCTATTGTTGATAACGTTAACAGACTGCTCAGTCTGACT  
 ATGGGCTTTTCAAACAAGGGCCCTCACATTTACGATATTAACGCAACATTGACTTGAGATATATACAGTGTGCTCCAA  
 AATTACTGGCACCCCTGACTGGCAATGAACAAACAATAACTTAAAAAATAAACAATATAATTATAGAGAGAAACTC  
 AAAATACCAACATGTGAGAAATACTGTACTTTATTCATGTTTCAATGGAACCAACCAACCAATACAAATTTAATTTCA  
 AAATACATTTCCCCAAAATCAAGGTTTCATAATTTATGGCACCCCTCATTTAGTACAACCCACTCTGGCAAGGATAACAA  
 CATGGAGTCTTTCCCTGTAATGTTTGAACAAGTTAAGGTACACATTTGGAGGGATTTTGGACTACTCTCTATGCAAAATC  
 CTTTCAAGATCTTTCATTTGGGTTTGGCTTATCAACTGCCCTCTTCAACTCAGCCACAGGTTTTCGATTGGATT  
 CCGGTCCAGCACTGAGATGGCCATGGCACAACATTTGATTTGTTGTAACAGAACCATTCTGTGTGGATCTTGAGGTAT  
 GTTTTGGGTCAATTGCTTGTGGAAGTCCACCTACGGCCAAGTCCAGCCTTCTGGCAGAGGCAACCCAGATTGTCAACA  
 AATTGCTGTACTTGGTGAATTCATTATGCCAACAATCTTAACCAGTGGCCCTGGACATCTGGAATTAACAGCCCC  
 AAAACATCACTGACCTCCACCATCTTACCGTGGGTATGAGGTGCCTCTCCTTGTATGCATCTCTGTTTCGACGCCAA  
 ACACGCCGATGCTGTATCTGACCAAAACGTTCAATGTTGGTCTCATCTGACCAGAGCACCTTCTCCAGTCATAATTTAA  
 ATGACGTTTGGCAAACCTCAAGCCCTTGGCTTTCTGATTGAGAGGGGGTCAAATACTTATTTCCCTCATTTAAATGCA



AGAGACTGGGAGTCTAGTCGGGATCAAGGGAAAGATGAACGGAGCAAAGTACAGAGAGATCCTTGATGAAAACCTACTC  
 CAGAGTGCTCAGGACCTCAGACTGGGGTGAAGGTTACCTTCCAACAGGACAACGACCCTAAGCACACAGCCAAGACAAC  
 GCAGGAGTGGCTCAGGAAAAGTCTCCCCCCCCCCCCAGAACCGTAGTGCCTGGAGCCCCCAGGTGACGTTTTGTT  
 TTTTGCCTAGCCTACAGAGCAGATCAAAATAATCAAAGCTTGATGACTTGGTTATTTCAGAACTGACTTTGGGAAA  
 CCCTGATGTACTGTAAACATACTATTGTGTTACAGTAGTGTACTATAGACTGGTAGAACAATTGAGTTATTATATTAAT  
 TCACAGACATGCACAGTTAAAAGGGAAATATATCAACCAAAGTAATTGGTCAATAGAAACGGGCACAGTACGTCTTTTTG  
 ATTTGTAGTTTGTACTGGGAAAACACTGTAACCTCATCATTTTATTGAGTGAACCCGTGTATATACCACCATCGATTCAA  
 CCACACATGCTAAAGTGAGAGTTACGCTAATATTGTCAATTAGCATTTATTTGTTGATGTATTATACAGTGTATGAAGCT  
 GTGAGTATTTCTCTATGACCAAATGATCCTGACCTGACCTGACCGTGACCTCTCATATACTTTCCGTCCGACGTTCCCA  
 TGGACTTTGCCTTTTTCTTCCCCTTTATGCCGACTGATTTCCAATTACCAGCAGTGACATTTGCCAAACCATTTTTTACA  
 TGTGACGGATCAAACAGACAGACAGCCAGACTCTGCACCCCTCCTTCCACCTCCTTCCCTCCATCCTGCTTTTTGCTT  
 GACTGTTTTCCACGCGGGCCAGCTGTTTTGGACCGCTTAAATGTGCGCTCATAGTGCCTTCTGGGAGCTGTGGATGGCTT  
 GGCTGAGCTGCTTGGATTGTGCTGATACGACTAGGCTTAAAGACAAAAGAAGAGAAAATACCCCCCCCCCTTCTTATC  
 CCCCCAGTCAAATAATCTGGTCACTCAGCGAGTCTACTATCTTGTAAATTCCAAGCGTCTGTCTTCCACTCCTATTG  
 GGAGGTTAAGCCCTGTCGAGAAGGCATCAAAGCTCTCCTCAGAAAGCGGCTCGTATCATAGAGCTAAACAATCAGCTTTG  
 ATTTGATTTTTATCCTGTCTTATTAACCTCTCAGACCAGGGAGCCAAAGCCAAAGGCATGATGTAATTGCCAAAACAAC  
 TGAATAATCTCCGTGGATCAACACTGACATCCGGCTCTGTTACGTTTTGGTTGTTGTACTGCAGTAAAGTATTATGACA  
 TTTGATAGGATGTTTCTGTTTGGCAATAGGTTGACCTCCTGGTCAATGGATGAGTTCAACTAGATTCCATTTGAATGT  
 AACCTTTTTGTGAGACTTTTTCTGGTTGTACATGATAATTCCCTGTGTATGTTTTAAAGTCTAAAGAAATCCAAAAGCC  
 GAAACGCTTTGGTTCTACTTTTTAAACAATAAGAAGCTTTTTATTTATGAATTCCATTGTCTCCAAAAGTGCCTGAATCC  
 CCTCTCTGTTTATCAGTTTACCTGAATTTGAGTATCATTCACTGGACTGGACTACTACTACTGCAGTCATTACTAT  
 CACTACCATGACAAAACACCTGAACCAATCACACACGTTTCTTCAGAAAAGTGTACCTTGTCTCGTTCCCTGTCTTTCC  
 ATGGCTCATCTACACTGTGTCTTTCGCTGTGCGGGAGCTCCAGCCAGCTCCAGGACCTGTACCAGGCTTCCAGGCTTCC  
 CTGTTTGCCTTACCCTTCACTTCCCTGTGGTTCCAACGCAGTCAAGCTCCAGCACCAGCTCAGAGGCGCTGTCT  
 GATCCGACTCGATGATGGGTACGAGTACATACACATTGCACTTATTCAGAGCTCCTACATTGACATAATTAGCGTAAGCC  
 TTATCCAGGGTCAATACATTTGTGTTTACGTAATATGTCATTACGTAATATGTATAGCAAATCAAATGTATATTACCAC  
 ATGGATGTAGACATTGGTATTACAGAGGTTGTTTTGGGCTAGCTGTACAGGGCTGTTGTTTTGGACGTTAGCAAGCAAA  
 TAATCTCTTTCCAAGCTTTTGTATGCTCCGGCCAACATCTGGAATGGGCCAAAGTCACAGCTGCACCCCACTCTGCCCTC  
 CACCCGGGCCCCGTGTCAGTGTGCAAAACCTGGGTGAGAGTTAGTTGGATCAGGGCATGGTTTTTCAAGTGTATGT  
 GAAGGCGCTGGCGGTTGAGGCTGGTGGTGGTGCAGGCTGAAGCCCTGGCTGGCTTGCCTCGCTGCCCGTGTCTTCC  
 TACCAGCTGGCTGTATGAAGAACAGCGGTTTCATGCTGTTTACTGAGAGTGTAGGCCACATGCAGTCTGTCTCTGG  
 GAATGACTGCCTGTGTGAAGTAGAACCAGACCCTCACTAGTCACTTTCCACAGAGAGGTTAGAGGGGCAGCAGTTAAA  
 CCTCTCACCTCCCTCTTAACAGTGTTTATGGCTGGTCTGTTCTCTCTTGTGGATCCAGAGCCCTGGGGTCCGGACAG  
 TGACACCAGACTCCATAAATTACCAGACTCTCCCTCGTTGAATTATGATCCAGGAATTCACCTCGAGATTCCATAAATAA  
 GTAATTCAAAACATGGACAAATAATTCCTGCACATTCCTCAGTATATTGGGGTTTTAGACTCTTTGCCCTGTGTCTTGT  
 TTAACGCTTCTGGTTGCCTAGTGTGTCTTGAAGGATCAAACCATTTGGCTGGTACAGGTGGAGGTTTAGTTAGTTG  
 TAAAGCACAACAATCCATCCACTCAGGTGGCTTTCCTTTTAAAGACAGTCTGTGCCATTAAGCTGATCCCTTAGG  
 GTCTAGGGAAATACATCACACCTCTCTCCACTGTCTCTACACAAAACCCACTCACAAAACAGTTCCAGACCGTAATCC  
 TATGCTGGGAGCGCATAAATATTGATCTGTATGAAAAGGGATGGATGAATGGGCAGCAGCATGGGGTTTTTACACACCG  
 ACATGGTTGCCTTCTCTGGAGGAAAAATAGAATATGAGGAGAGGACTAGAAAGCGATAGAGAGAGAAAACAAGATCAC  
 AGCTGGAGTGTGAAGAGCAGGAGTTAGAAAGGGGAAAGGGCTGCCATCCTTTGATGGCTCTGGCCAAACCGTCTGCTT  
 TATCACAGTGTCTGTACCGTGGAGACGGCTGTCTGCATAAAGCACAGCCCGGGGAAGGGGGGGGGGGGTAAAAAA  
 AATAAAAAAATCAACAGGTAGCATCTTCTTCCATTTCCCTTGTCTAGTCCCTTGAATCAGGGAGCAAAAAGTGCAGAT  
 GACGCGCAACCAATTCATCACTCTCCCAACGCAAACAGACCCAAAGTGTCTTCTTCCGCTCTGCAGTGCCTGATGCCTCAG  
 CTGGAGACAGACAGAAGGAGAGACAGACAGAGGGGGAGAGAGAGAGTGTGTGTGTGAGAGAGAGAGAGAGATGGAACA  
 TGGACCAGAACAAGAACAGCAGCTAGGCTATGCTTAGCAGCATCTGGATGTGCTGTGTTTCGTATGCACACAATGTCTCT  
 TTGGATACAATCCCAGACAATTTTCTACAGTATTAGCTCAATTTGTAAGCATCAGTGAACAAGGATATAGCTGCACAGT  
 AGTGTGACATTGCAAAAAGCTTCTAGAGCCAGGAATTACACAGGGGCAGGTAGTCTATATAGAGCTGGGAGCCAGTATTGT  
 TCATGTTAAACACTGTCACCTGGAACGACTATTCAGTTAAAGATACACTCAAACCTTTGTATCATTTCCAGCCGTTAGT  
 TTTGAAAGTAGCCTCAGCAGGCAATTAGTGGTCCCTTTTATTGTTACTATGTCACTCAAATTTGTACTACAGTACA  
 TCATTCATTTTTGTATGATATTTTTATGCTCTGCAATGTTTTTTTTTGAATGATATGTTTTCAATCCAATTTGTACTAT  
 ACGTTACAAATTTGTGTGCTTAAGATCTGGAGTGCATCTTAAAGTAGGCCATAACTTTAAAAGCCTGTTGTCTCTGACT  
 GTGATTTGTGCGGTGGTGACCGTGGTAACTGCTCAAATCTGCGGAACAGAGAGAATGGATAGGACCATTTTAATTTTCAA  
 ATGTCAACTGTCAAATTTCCAATGTTCAATTTGGTTGCGGCGTAGCCGGTTACAGTTCAGCAGGCAGTGTCTGATGGG  
 ATATATTCATCATCTATTGGATAATTGTAGAATTCACATGCGCTCGGGGAGAGAGCTGTATGGACCAGAAAACATTACAG  
 GGGATTCGTCCAATGAAATATTTCATGACTCTGTGAAATCTGCATATAGAAAAGATGTGCTATATTTAAAGGCCAGGG  
 ATGAAAGATTGCTAATCACAGGTTTCGATGGTGGATCCTGACCGAGCCGTTGTCTGAGGATTTGATTTTTGAATTGCAC  
 TTTTGGCGCCCAATGTGCGGGCTTCTGGGTTTAAAGCTACATTCTGGGATTCAACAAACTTCCACACGCCCCACCATATC  
 AAGAAATAAAATAACCATTCCCAGATTCCAAACCCAGACTGTGCCTTTTAATACTCCCTGTGGTCCGGGACACAGAAC  
 CTTGAACGGTTGAACCTGACTGACAGTGCAGCTGAATAGATAGCAGCAGCAGCAGCAGCAGCAGCAGCAGCAGCAGCAGC  
 AGTCTACATAGAGAGTGGGAAGTCTGGGAGACGTACACCCAGGAGGAGGCTGCAGTCAAGCCAGCTGCAGGCTGGAGCCA  
 GGCATGCGGTTGACACTTACTCTAGCCACATGTGGCCTGAGGAAATGACAGCAGAGCTGTGGGTTGAATGCAAGTTACCT  
 GTTTCACACCCGAAAATGACTGCAGGTGATTTTTCTAAGAAATCCGCTGCTTAGAGAGCCGATGGGAGACTTTTTTGA  
 ATGTAATTTTTCTCCACTTTTGTCTTTTATGGATTTAAAGCCCTTCTCAGGTATACAGATCCAATCTGCTTTTTCATGATT  
 TCCAATAACAGAACGTGGAACGAATAGCAAGAATTCAGCGTTTTTCTTTATATTGAGGCTTCACGGTGTGTGAATTT  
 GCACAGTAAGTTTGAAAAACCTCTACCTGATTCAGAGCATCCAATGTGCAGATTTTCTTGCACAGTTTGTACTGAC  
 ATTTGATCTGGGATAAGTTGAATAATGATGGGGACTGGTGTGACAGTGTGTGCTGACTTCTGTGGGTTGTGTTGACTG  
 TGAGATGACTCAGGTTCCCGCTGTGTTGTGAAGCCAGTGTGACAGAGAGAGAGCTAGGCTGGGCTGCATGTAATAATGT  
 TTCAAGTCTCCTTACACACACACACATACACACAAAATACAAGTATGTACTGTACACACACACACACACACGCGCAC

ACACGCTGTGGCGAGGGTGAAGAGCCCCATCCGTGTTGTCAACAGGATGAGAAGTGAAGCAGAGCGATGGAAGCTGGGG  
 CATTGGCCTCCTCCAGGGCTAGCTGTGGGATTTCCCTCCAGAGAAAATAGAAAATACATATAAAATAGATTCCATCCACCC  
 ACAATACTGCTAAGTGGAAAAACAAGACCAGATTTGTATATCATTTGGGTTTCCATATCGCACCCCTAACGTGCCCTTTTCAA  
 CCCTGATTTGTGTCTACGTTAAGTGCCTTTTTTTTGTGTATCATACAGGGCAACAATTACATTAACAGGGCTCATATGTGAG  
 TTATTTCATATGGATGGGCATAGATTCTTTGCATAAAATCCATAAAATACATTTTCCAAGGATTTTCGATGTGCAACCATTT  
 CAGATATGTATTACTGAATGTGGTGAATGTCTGTGTGCTGTAAGACTGAAATGACTGTGGCTGAAATGTGTGTTCTCTCT  
 CTCTCCCGCCGTGTGGCTGTACCCGAGGTTGGAGAAGAGCCAGTCGAGCTGTGCTCCCTACCGTCTGCAGCTGGAGCA  
 GTGTCTGTCTACCCAGCAGGTGCCACCCCTGAGCTCATCCAGGGCTATGTCAAGAAGGTGAGCCTCAGATAAGGCCCTG  
 TCACACTACTGAGACGAGCTGAGCCAAGCCAAGCCGTACTGAGCTTGGCCTGGTTAGTGGTTAGGCATCCACAACCTGTGC  
 TGAAAAGGACATCGACGTGAACGGAAAATATTAAGTCGGCACATTTTTTGTTCGGGTGGCATGATAGTGTGAAAAGGGTAT  
 AGTGGACTCAGATCACAGGCACATCTGACCTTCCATAGGTCTAAAGACCCTGTGGGCAAAAACATCTTTGTGTCTTT  
 ATCNNNNNNNNNNNNNNNNNNNNNNNNNNNNNNNNNNNNNNNNNNNNNNNNNNNNNNNNNNNNNNNNNNNNNNNNNNNN  
 NNNNNNNNNNNNNNNNNNNNNNTGGAAAACAGGGAAACAGGGTCACACGCCAAACAGTCAGAAAGTGAAAAGTGGGACAT  
 GAAACCGACATGCTCTAAAATAGCATCAAAGAGCGTTGAGGTTATTTAAACTTAGCGCTGAGAACATTCCTGTGGGATCA  
 CAGGTGTGAGAGGAGGAAGTGTATGTTATATAAAAAGACAGAGATTGGACAGACATCACAATGGTCAGTGAATGAAGCAG  
 TATGAAGCTAACACTCTCCAACATAAAATCATGTTGCAGAGGAAGCTGGCCAACATGTTGGTTGAGCATGTATTTATTT  
 ATGAAATGTTAGTCTGATTTAAATCGGTGTTGAGGAGGGTGGATTAGCAGAACAGATGCTGTATGTTCAACAGGGT  
 TGTGCACAGTGCACATTTATCATTAGGATTAAGGGGCTGACCTTGTCTCTTGGACAGGCATCCATCAGGCCAGACTTTAA  
 AGGGACCATTTGGAATGTGTAATTCGTTTCAGGCGCTCGTTTACTCGTTAGTGTCAATTTTCTCAAATGATTGGACC  
 ATACAAGGTATCGTCTCATAGCAGGCTGTACCTGATATTTCCATGTGACTGTGGCCCGCAGGTACACACACCCTA  
 CCGTGTGTTATCGCCATCCAATTTCTCAGGGTAAGTCAAGGGCGACCCATAAATATTTGTTAACCTGATGCCCTGATG  
 CTAAGTGTGCGAGTCAGTTGCGTTGTGAAGTGGTTATCATGTGGGAATGATCTGATAGGTATGAATCCCTGGATTATC  
 TTTAACTCCAGGTTATAACTCACCTTTAACCTTTGCGTACAAGCTAGCTGTCAAATGGATAAACAATGTCACAAAT  
 TGTTCAAAGTGTGTTATAAAAATGTATGTTATACAATTTACCACGATTTGTCTTCTCTTTAAATGCGTTACCATTGAGCT  
 GTCTGGTTTAGTTCGGATGCATTAGTGCAGGGTCTCTGTGCTGATGATAAAATTAACAACGGTCTGTGACACATTGCAGA  
 CGCAGAGCATTTAGTGAATGGTGAAGCTAGCAGTTCCTCAAACCGCTGGCCTTGAACGAGTAAACATCACCTTTTAAAT  
 ATTTAGTGAACCTCATTTTAAATTCAGTCTTTTTTGGGGGAAAACAAACAGAAAAATGAAGATTAGTGGAGCGACTTT  
 GTTGTAAATGACTTGGCTTGGTTTTCAATACGTTTTTGTACTTTCTCCAACGTATGCAGGGAGAGTTGTGATGCATTATTGT  
 CATTCAAGTGTGATTCTGGAGCTTTGAAGAGTGAACAAACGACAACTTGGGGAATTTTGGGCACTGTGCACATCAGT  
 CAGATGTGGGAGAAAGGAAATGGTTATGAATGATTCATTTCCCTGGGTGCTGACTGAATGACTGACGAGAACACGAG  
 CAACTGAACCATGGTCCCTCTGATGTAGTGTGTGTGTGTGTGTGTGTGTGTGTGTGTGTGTGTGTGTGTGTGTGTGT  
 GTGTGTGTGTGTGTGTGTGTGTGTGTGTGTGTGTGTGTGTGTGTGTGTGTGTGTGTGTGTGTGTGTGTGTGTGTGT  
 TCTAACACATTTCTGGCCCTCCGTCTGGTTCACATGGGGATGGCAGATATTAGCATTAAAAAGAGAAGATTATGCAGCTCT  
 TGATTTAAATGGCTGCTGCCGAAACACAGTCCATCCAATGTGTATGCATTGGTCCATATTAAGGAGGACCATTTCAA  
 TTGAGGCACAAGCCTTTGGTAGGGGATTTGGGGAAATGATGAGTCAACTCTGTTATGTGTTATTAATCACCTCCGTTGT  
 GGGGAATGAGTCAACTCTGTTATGTGTGCATAAATCACCTCTGTATGGGGATCAACTCTGTCCAGATAAATCTCTGT  
 CCGTGACATGTTTTCATGTCCGCACAATCTATAGCGATTGAGATTGAGTGTCTGTGTTCTCAGGGGTGAGCTGTACGCC  
 CTGTTCAACCACCCAAATTGACCGTGAAGGGCAACTGAAGTACTACACTGGGAAGGTACCCTGAGGGTTCAACTCCGTGA  
 CGAGGGGGTGAAGGGGTGGAGGCCAACTGGCTGGATCACATGACCCAGCACTTCAACAACGGGGCCTCACTCGTTGATG  
 GATACTTCCACCTGGGCAACGACAACGGTAAACAACCTATCCAATGTCCACTTCATGTTTTTACACGCAGTACTTTTTAA  
 TGTAAACATCTGTTCTGCTGTGGTATAGTACTAGCAAAGTAATTGGCCTCTTCACAATATCTCAGTACTTTTTTCATCCGT  
 CTGGCAAACCTCTTATTTTGTCCACGTAAGTAAATAATGTAATAAATAAATAAATAAATAAAGACAAGGAAATGATGA  
 CTTAGCTATTGCCAAAATATCTGTCCCCTTTTCAAACGGTTCATTTCTGTGCTGTTGTTGTTCTAGTAGTACTCTGTGCT  
 ACTCTCTACTGCACATTTGCACCTCCAGCTCTAGCCCTGGGGCATGACACTTATTCTGATGGTGACGAAAACCCCGC  
 CTGAGTAAATAAGAGTCATAATTCATCTCCTAAAGTGAACGCATCAGCGCCTCTGAAAACACAGATAAATAACCTGA  
 TGGCAAATGAGTGCCTCCTTGCATATTTATCTCTTTAGAATGGGGTAAATGAACCGCTTATTATAATTCCTTATTTTCT  
 ATTAGGTTATTGTAATATATTTACCATTTTTATGTGTGGTAAAGATATGCATCTTATATTAACAGCAAGAGCGTATTATAA  
 AAATTCATATTGGCCAGGCCGTGTTCTGTATTGATCTGAAATGTGAGCTCTGTATCAGAAAATAGCTTGTCAAGTGTACT  
 GTATAGGGAACGGCTGTCAATGCATGCCTGCCAACCTTTTCAAACAGACAAGTTTGGCAGATGAACCTTGTGTCTC  
 GTGTGACCTCTTGGGAAGTGAACGGTAGGATATAAAGCAAGACAACATCACGTGTTTGTGATTAATTCATCAAAA  
 CGGAGGAGCGTCTGGTTTTAACAAGCCTGAGAACCCTAGGCCGTGCAGATAAAATTTAGCACCTCTTTGAGACTCCATTTCT  
 GTATACGTTTCGAGCATGAGAAGAACTCTAGAGCAATGAGAAGAGACGCTTGAACCGCTCTCCTCTCTGTAACATCAAG  
 GGCATCTGGAACGTGAAGCAGCACAATAAAGATGGAGCGTGTGAGTGGCGATGACACTCGGTTTTGATTGGAGATTATA  
 ATGACAGTCACAGCAGAGCACCAGAAGTGAAAATAAGTGTCTCTGATTGTGCATCATGCTCTGTCTCGGATGTAGTGT  
 AATTCAACTGTGTATCAATACTCTGCATGGTCCCTGTTATGCCTTGTTCCTGAAAGAGGTCTTGTCTTCTTGTGCTTAA  
 GCTCTTCTCTGAECTGTTTGGTAGTGCCTACTTTCCCAATGCTCCCACTTTACATGACATCACAGGCCATCCGAA  
 GTAACCGCCAGTGGAAATAACCTATATATGTAACAACCTTAAACAAGCCAAAGCAAAATGTGGTTACCGGTAGCCAGTTACC  
 CCTTTTAGGTTCTCTTTCAAACAGAAATTAACAATGCTAATAACTATGTCTGCCCTGTACCTTCTAGTTACAGAGGAAT  
 CATCTCTCTGCGATGTAAAGTTTCCCTTCATTGTTCTGACTTGTTCGCTGTTGTTTACTCCTACAGTCCGACGCCCTCT  
 TCGAATACATATTCATGAATTCCTCTGCTCGGCTGGCCTTTTGTAAACCCGGCGCTACCTTCCGACTGTGGCTGGCTG  
 TCGACAGCCTGCCTGGTATGGTCCAGGGGAATACCACACATGCTGTCTCTCCTCTGCTCCTCTGCCCCCGCCCCGAAG  
 AGATGGGTTCCATGGTGAAGCTCACTGAGGAGTGGGGAGGGGGATAAGTCTGTTTAAATATCCGGCGTGGCTAGGTG  
 GGATGGAGGCGGGAGCTGGTGGGAGTGGCTTCAGAGAGACTCGCCGACGGAGGGTCCGATATTAGTTTATTATTG  
 AATTTGCGGATCGTGGCACTGGTAGCGGCTCCTATGTAACGTTAACCGCCCCGCCACCTGCAGCGTATGAGAGGGGC  
 ATTAAGATTAATACCAGGCCAGCGTGTACGGCGCCATGCCGCCAACGCCACGGCTGGAGTCTTAGGGGGAGCAG  
 TTTGTTTACTGGTGAATGATACTAATGGTGTGATGGGGAGTTTTTCTTTGTTACGCTTAGCTTACGCTACCTCCGCCG  
 CAACAATGAGGATTTGAAGCTGGCGTGTGAAACATTTGAGCTATTCATATGCATGACAACCTAGCATAGTGTGGCTTT  
 CTATATTCAGGCAAAGCCGGTAGAGAGAGAGAGTTCCCAGAATGAAATCCAATAAGGTATTACTTACAGTGAACA  
 GAATGAGGAAAGTTTTGCTGGCAATTTTTATGGCCAAAGATTGGTTGTGAAATAGGGCTTGAAGGCCCTGTGTGCGTGTG

TGTGTGTGTGTGTGTGTGTGTGGGTGTGCGTGATTGTGAGCAGTGGAGCAACAAAAAAGATACCTTAATAGAAAA  
 TGAICTCAAGTTAAAGTCAACCAGATAAAAACTACTTGAGAAAAATCTAATATTTGGTTTTAAATATACTCAAGTATCA  
 AAATAAATGTAATTTGCTCAAATATACTTAAGTATACTAAGTAAAGTATACATCATTTCAAGTTCCTTATATAAGCAA  
 ACCAGACAGAACAGATGTCAGTAGCGATGACCAGGGATTTCTCTTGATAAGTATGTGTAATTTGGAGTCTGTCAAGAA  
 TAAAAATTGTAACGAGTACTTTTTGAAATGTCCGGGAAAAATTGATGGAGTAAAAAAATTTGTCAAAAAATTGAAATAGTAATGT  
 ACATAATTGAGGAAGATAACCCACAGATATCCCATGTGCAGATACCCCACTTAAGTAGTACTTTAAAGTATTTTTACTTTA  
 AGTACTTTACACCCTGACTGTGAGTGTGATTTTTGGGTGAACATGCCTTTGTGTAAGGCAGGGTACAGTATTCATGTCAT  
 ATTCCTTAAACCCCTAGCTATAACCAGAACTGTGCCGGTAAGCACAGGTACGTGGACCCCTAGCCTCCGAACCTTTGGCT  
 CATAGGAGGAAAGCCTTGGCCAATTCACACTAGAGGTGACCCGATTAATGATTTTTATTTTTTACGCCGATACCGA  
 TTATTTGGAGGACAAAAAAGCCGATCTGATTAATCGGCCAATTTTTTTAATTATTTATTTATTTATTTATTTATTTATTT  
 TTTTTTTTTTATATATATTTGTAATAATGACAATTAACAACAATACTGAATGAACAATGAACCCCTTTTGTTTAAATTAAT  
 ACATCAATAAAATCAATTTAGTCTCAAATAAATAATGAAACATGTTCAATTTGGTTTTAAAAAATGCAAAAAACAAAGTGT  
 TGGAGAAGAAAGTAAAAGTGCAATATAAAAAGCTAACGTGTAAGTTCCTTGCTCAGAACATGAGAACATATGAAGCTGGT  
 GGTTCCTTTAACATGAGTCTTCAATATTTCCAGGTACGAAGTTTTAGGTTGTAGTTATATAGGACTATTTCTCTCTATA  
 CCATTTGTATTTTATATACCTTTGACTATTTGGATGTTCTAATAGGTACTTTAGTATTTGCCAGCCTAATCTCGGGAGTTGA  
 TGGGCTTGAAGTCATAAACAGCGCAATGCTTCAAGCATGCGAAGAGCTGCTGGCAATGCAGTAAAGTGTGTTTGAAT  
 GAATGCTTACGAGCCTGCTGCTGCCCTACCACCGCTCAGTCAGACTGCTCTATCGAATATCAAATCATAGACTTAATATA  
 ATATAAATAACACACACAAATACGAGCCTTAGGTCATTAATATGGTCAAATCCGTAAACTATCATTTAAAAACAAATGT  
 TTATTTCTTTTCAAGTAAATATGAAACCATTTCCGTATTTTATCTAACGGGTGGCATCCCTAAGTCTAAATATTTGCTGTTACA  
 TTGCACAACCTTCAATGTTATGTCATAATTACGTAACATTTCTGGCAAATTAGTTCCGCAACGAGGCAGGTGGCCCAAATG  
 TTGCATATACCCCTGACTGCGTGCAATGAACGCAAGAGAAGTGACACAATTTACCTAGTTAATATTGCCTGCTAACATGA  
 ATTTCTTTAAAAATAAATATGCAGGTTTAAATACACTTCTGTGTATTGATTTTTAAGAAAGGCATTGATGTTTATGGTTAGA  
 TACAGTCGTGCAACGATTTGTGCTTTTTTCGCAAAATTCGCTTTTGTAAATCATCCCCGTTTGGCGAAGTGTGGCTGTCTT  
 TGTTAGGAAGAAATGGTCTTACACAGTTTGAACGAGCCAGCCAGCCGAGACTGCTGCATATACCCCTGACTCTGTGTCGA  
 CAGAAGAGAAGTGACACAATTTCCCTAGTTAAAAGAAATTCATGTTAGCAGGCATTATTAATAAATATGCAGGTTTTAAA  
 AATATATACTTTGTGTATTGATTTTTAAGAAAGGCGTTGATGTTTATGGTTAGGTACACATTTGGTGAACGACAGTGTCTTT  
 TTCGTGAATGCGCTTGTAAATCATACCCATTTGGCGAAGTAGGCTGTGATTTCAATGATAAATTAACCGGCACCGCATT  
 GATTATATGCAACGACAGGACAAGCGTGTGTAGTTAACTAGTGATTATGTTAAGATGATTTGTTTTTTATAAGATACGTTT  
 AATGCTAGCTAGCACCTTACCTTGGCTCCTTGCTGCACTGCGGTAGCAGGTAGTCAGCCTGCCACGAGTCTCCTCGTGG  
 AGTGCAATGTAATCGGCCATGATCGGTGTCCAAAATCCGATTAACCGATTGTTATGAAAACCTGAAATCGGCCATTTCCG  
 ATTAATTGGTGCAGCTCTAATCCACACACATTAGTAACCCCACTCTTTCTATATCTCTCCTTCTCTCTGGATTCTCTGT  
 CTGTCCCGTTTTGAAAATATAGATAAGCTGTACAGCCCCGTCTCCTGTTCTCCCCGGCAGTGCTAAGCATACATGTTTAA  
 TTCATGTGAGTAACAGACAGGACTTTGGGGCAGGGTCATTCGGTTGCTTCTGCGGTCAACAAGGCTTTAGATTCCCCTCCG  
 TTTTTTTACTCCTCTGTGCTCTCCTTCAAAGTCTATGTCAACCTAGCATCAGTCTCTTTGTCACTTAGTGCCCTGTCTTC  
 AGTCCACTTCCCTGTCACTGGGCCCCAATTAGGTTGGTGTCTCCGTGTCACTGCGGTGTCAAGACTCACGCCGCCATTGTTA  
 CTATCTCTCAGTACATCTGTGTCACTCTTTCGTCTTTCAGTTCAGTCTCTCTGTGTGTCAGAGATGGTATGCGCACATCTCA  
 TCAGTATGTTTCAACCTCAGGTGCCCTGGAGAGGGTAGGCTAGCTAGCATGAGATTACATTTGCCATTGCGAATCAACCGT  
 TTTCCCTCCAAGCTTCTGTTTCACTCACTACATTTGTGAGTAAAGACTCAACTCAAATGTTATGCTGTTCTTTGTGTTGG  
 CACTACATATCCTCCAAACCTCTCAACTCCACGGTAACTCAGTGTCTGGCAGCATCGTGCCAGGAGGCAGCGTGTTCCTC  
 CTAAGCAAAGGGACTCGATCCCTGTGTGCATCTCACTGAGTGATCCAGTGCATCGGCAGGCCAACCAATCTCCAAG  
 AGGGCTTTCCAATTAAGTCAAGCAGGAGGACATCTGATGAACAATGGATGGGGGGGGTGTAAAGGAGGGGTAGGGTG  
 GAGAGAGGGCGGGAGAGGGGGGAATGAACAACGACAATGTCTGTATTTGAAAGGAGCCAAATAGATGTCGAAAGATGTCT  
 TCAATFGAGCACCTCAGCAGCCTTAAATGGGTTTTCTGGGGGAAATAAAGGACCCTGTATCCCTCCCTTTCCAGCCA  
 GCCCTCGTTCCCAATTAATAGGGCAGAGTAATGAAATGTGGAGTGTCTCATGGTGGAGCCTGGGCCCACTAACTCTAT  
 TAGTGTGTAATGGTACAGGAGTAATGAGAAAGCACTCAGGCCAAGTGAAGGCCCTGGTCTGAAGGGCAAGAGGTTCTGG  
 GACTGCTCAATGGAATCAAAGAAATGCGGGATGGAGAAGAAGCTCACAGCTCGTAATGTTCCCTATCCCAATAATG  
 CCCAAACTGGGAATGTTACCCTTGTCCATGGGGTTCAAATGAAATGGAGTCTATAGAAAAGCTATTTTTATGGTACCATGG  
 CCCTGTCTTTGTGTATTAGTCTTACATGTAAATATCTACAATATGTAAGCATAATCATTTGTTTTAGATGAATCGTGT  
 ATGCTTCAACAATAGTCTCCATAATGTCGGTCTGTTCACTATAAATCTCTCAAGCTTCTTCCCTGAAGGAAACACTCTCT  
 CTTGTTCTGTGATAGTACATAATCCATATCTGGCCCTTGTCTACAGAAATGGTCCATGCTGCAGCCCTGCCCTGGTAATA  
 AATGTCCAGTGTCTGTGGGTTGCTGGTTGGGTGCGTAATGTCATTAACCTCCCTCTCCTCTTTGCACGGCCTAGAGGCC  
 TGGGAGCCAGAGAAACAGACACCCCTCCATTCTGTAAACTCCTTACATGACCTTCCCTCTCCATTTTCTACAGATTTGCAGCC  
 TAAGTCCGTGGAAAGCGTCTTCACTTCCAGGAGGGGACGGAGGGCGTGCACCAGAGTGTGACCACCACGTACGATGCCA  
 TCGTGTGGAGCAGTGGACTGTCTGACGTGAGTGGGATTTTTACATGGCTCGGAGCGTTTCAGTGTTAATGTGAGAG  
 TCGTCACATGGAATATTTCCCTCTGACCATGGTGGCTATGGCACATGTGTACGGTGGCTTGATGGCTTATCTTATCTGC  
 AGCAAAACAGCCCTTATCTGGCCAGCATTAAAGTCCCAGTTTGGCCAAATCCAAGTTGAAATGGATTTCTGTCTACCT  
 CTGAAGGGTTTTAGGCTTTTCTCTCTGTGTGTGTGTGTGTGTGTGTGTGTGTGTGTGTGTGTGTGTGTGTGTGTGTGT  
 GTGTGTGTGTGTGTGTGTGTGTGTGTGTGTGTGTGTGTGTGTGTGTGTGTGTGTGTGTGTGTGTGTGTGTGTGTGTGT  
 GTGACTGGAAAATTGTCCAGTTCAGAGAGGAAGTCCGCTCACAAACACAGAATTTAACCTTGAATAAAAAATGCTCTTA  
 ACCCTTTAAATTACTTACAAAAATTGAGACTACACAATATTCGCTGCCTTAAATGTGATGTTTGTTCAGCGTCCCACAC  
 CACAAAAAACCTAGGCGCTTGTGTCTTGTGAAGTTATACACTGTACGAGTATGTAGGCATATTTATGCTAATACTGTG  
 GTAAGATACTGCAATAATGTCTTTATTAAGACCAGCAATATTTTATCAACTGCTGAGAAATAAATGATTTGATTTATAT  
 ACTTTTTTATGCACTTTTGAAGTTAATTGAAGGCAAGCAACAATGTTTAAACAATTTAGATGTTTCAATTTATAGTT  
 CCAATGAATCCAATCAAATGTGCTGGCCAGGACTTATCAAAGCAATTTTGTCTAGACTAATCTCTCTCTCTCTCTCTCTCT  
 ATAACACTATTTTACAAAGGATGATCAGACTTCATACCCGGCACATTCATTATGATAACTGCTTAAATGTATATGCAAA  
 TTATCCTCACCGCTCATTGTGTTTTGGTGGCCAGAAATAATTACTTAAATATTTATGCAGAAATTTGATTTGGGATTTTTTC  
 CCCAGCTCTCTTGTCCCATCTGTGAAAGACTGACAGGTGGTTGGATTTATGAGCAGCGAAACAGAAAACAGGCTGGT  
 TCACTGAGAATTCATCAATATTGTTGTGTTGAAGCAGGAAGTGCAGCTTTTCTCAGAGATTTTGTTTTTCGTATGGCACA  
 GAACATGTCAAACTTCTGTTTTAATTGATAGCAAACCTGCTAAAACGAATCTGACTTTTAAACATAAATGAGGAGTTATTA





AGACGACAGAAAGGGAAGAAAGCAAGGTTGACCAC TGCTATGTAAC TCACTTCTCACTGTGGTAGATGT CAGCTATTAGT ATGGCATCAGGACTGACCATACTAGTCACACAAACCATTATAAGGTTACCCCTGGAGTGTGGATCGCTCCCCTTCAAGT G GAAC TGGAGCAATTATAATAACAACTGCATTTCCATTCCTCTCCTCTGCTCTGAAATGACCCCAAGTATTCTTAAAG AGCTGTGGCAATGTGATTTGTGTGCATGGATTTCTTATCGATGGTFACAGGCATTTGTCTCTACAAATAAAGTAAC T ATGAAGAAAATAGAAATGGTTTCCAAGT TATTTGTATTTT CAGTGTAAATATATTCTCTACCTCCCCTCTCTCCATAT TCACCTCTGCCTTTTTATCTCTCCGTCTCCCATCTCTCCCTCTGCCCTAGTGATGGAAGT TTTGGCCACCAAGCAGGTCCT TTTTCTGCAGAGACCTGTCTTCCCAGGAGGGGGAATCCAAGTACGTGACCTCTCATTCCCTCCAGTGTGTTGTCT TGGCACATGTGGGTTCGCTTGCAGCTTGTTCACTAGCCAGAGCAGAGCTCCAAGGCCAACATCACCCCTCACCACCCCGG CCCATACCACTTGTCTTGTGTTCACATAGATAAATATGCACACTGCCGGTCAAATGTGAATGAACCCCTTTCTTCTT GAGATATGAGCCATTTCTGTGTAAC TACGGCAATGCATGTTGAGAAAGTACTTTCCATTTGACCCCTAGATAGTACTGTCTA TAACCTCTAGATTTGACCTTTGTCTTTGTGGAAGGAATCAATGCTGATATTGCCTGTGACCTGAATTTAAACTCTGGTC ACCATTTGGCAACCAAACTGATGGGCAATAACCCCTGGCAGAGATGAGCAGAGAACGATAATGTGGATGTTGTGTGCTGGT AACATGCTGTTTACCTCAGTATACTGTAAGTCTCAGCTAAAAGAGGGTCAATGGAGGCAATCTCAGAAATATTACCAGCC ATATTTCTTGTGTTGGTCTGTACCCCTGAAGGCACCAATCAATTCCTTTGAAATTTACCATTTTCATTTCCCCACAATGACAA TCATTTTAATTTGTCTTTCCTTGTGTGCTATTATGTCATTTTTCAACGGTCTGTCTGTCCGTCTGTAACATGGCCAATA GAACAGCAGTTTAGAAATGTTCTTACACAAACATCTGTCTTTCAGAACTGATATTTAAAAGCAAGTCTAACAAGAAC TCTGTTAAAGATGCATCAAAAACAAGAAGAAGAAAAACAAGCAATCGGCAGCAGAGAAAGATCTGGAAGATTCCCAAG ATTTCTTGCAGCAGGGGAAAAGGTTGTTCAAAGAGAGCAAGGAACTGCGAGAAAAACAAGGGGAACGAAGAGAGACAGTGAA AGAGACGGAGGTAGAGACTGTGTGTAAAAGAGGCGGAGGCTCCCTGTGAAGTGGACGGAGAGTAAAAGGTTGAGNNNNNNN NNNNNNNNNNNNNNNNNNNNNNNNNNNNNNNNNNNNNNNNNNNNNNNNNNNNNNNNNNNNNNNNNNNNNNNNNNNNNNN NNNNNNNNNNNNNNNNNNNNNNNNNNNNNNNNNNNNNNNNNNNNNNNNNNNNNNNNNNNNNNNNNNNNNNNNNNNNNN NNNNNNNNNNNNNNNNNNNNNNNNNNNNNNNNNNNNNNNNNNNNNNNNNNNNNNNNNNNNNNNNNNNNNNNNNNNNN NNNNNNNNNNNNNNNNNNNNNNNNNNNNNNNNNNNNNNNNNNNNNNNNNNNNNNNNNNNNNNNNNNNNNNNNNNNNN NNNAACGGAGAATGTTGCCATGCAACAAGACCC ACCTGACCAGGAAGAACAGGTAGTGCAAAAAGGCAGTAAAAGATAATGGACAGGTCAAATGACCAATCAATGCCCTGAAG AGAGTCAAAGGTCGGATGTGTAACCTCTGCAGACATCACACCTAAGGGTTCCTTACCATCATTCATCTACCACCAA ACATAACCTGAGATAGGGGCTCCACAAGTCAACATTTGAACAGCCTATATTGCTGCAACATCTCTTACCATGTAATCACT CTATCTCTGCAGCAGACATCTCTCCACAATGGACACATCTTACCACAGATGGACACGCAACAGTCTCTCTCACAGCCT CAGACTGATCCTATACCTACACATAGTGAATGTACATAACTGAGAATGATGCGGAGGAGACTAATGTACAGGGTCACTG GATATAATGGACAAGTTGATGGGACCAATGGGGCTTGGGCTGAAGAAACAGACTTTAACCAGGCAAACTCGCTTGTCTT TATTTGTACAGTACATATAGTGTGACAGT TACTGTATGCCACATGGGTTTAGATGAGGAGCAGTGTGGGAAAATGTAGTGGC TGTGTTGCTACACGCAATCCAATGAAGGTAAGTAACTGTTTACTTTTACCCCGTAATGTAAAGTACTACAGATG ATGCTGATAATCACTCTGATTTCTTATAGTAGGTATGATACATTCGCCTTGCATTCCGTATGTGTCCATATCCAAGCCAA G TAAAGTGTTTGATAATGGAGTAAATCTCCATTTGAATGAATGTGTGTGGGTTGAGTGGAAAGTGAAGTGTGATGAGAACC AA ACTTGAAATGTTGAGTCAACTTTGAGAGTTTACACACGTTTGATTTTAATAGCTTTTCCAATCAATGGTCATTTAAAAG TACTTGGCAAGGTTTATGGGCTGGGCTGACTGGATGTTCAAGATAGAAACGGCGCACAGAGGAAGTAGAAAAACAAAAA TTATTTAGCATTGGAATAGCTGTGTTGCAATTTGCCATTTTCCATTTGACATTTGGCTTAAATATTTACCTCAAGCTTTTT AAAGCCCTCTTGACGGTGCTATTTCTGACAATAACAAAAATCATAATGTAGTCTTTCAAGGTATCATGTTGCTTTCCAT TTTAAAGTGGTGTCTGCTGATTTCTGTGTGGGAAATCTTAACCCGCTAAATGGACTTTTGTGACGCGGGCTGACGCAAG T CATACATTTATAATGGGGCTCACTTATGTGGCTATTGACAGTGGAAAATCTCACCTCTCAAAAATAACAAAATAGCACTTCA TCTGGATTGTGATTTTATAGGATTGATTCTTCTTGTGCTGCAGTTGGTAAGCAAAGTCTGTAGAAAACCTGTATGTTTA CAGATGAATATAGGCTGTGCTGCTATTTCTAAATGTGGTATTTTAAATGAATAACCGACTGTTGGTAATGTTTCATCTCAAT GGCAGATGTATTTGATAAGAAATCCAACCTGTGACCAGGATAGCCTTATATGATACTGGGCTAAATCGTCAAGTACAAA TGTGAGAAGTTTGACAAAATATCAAGGTGGTTCAGTGTATAGCCTGAGAGGGTGTGATAAATCAAGTGTGTTGAAGGTAAT ATGAAGGTAAGTTCAGTGTCTCTGTGTTTAGACTTGAACAGAAGGTAAGGGATTTGGCTTTACAAGGTGCTTTTTGATTTG AAGTTAGGCTCAGTGTATTTCTGCTGCTGTAACGCTAGCTGAACGCTGCTTTTCAACGCTCATACTGGAGTACCTC CTTAGGCATATTGGGGATTTGTAGCTATGGGGTCAATTCATTTGCCAATTTTTCCACCATATGGTCCATGCTGTGGGCTGGA GGTCACTACTAATGGCCAAGTGGTCAAGGGTCTGTTTGAACCATGTTTGTATGGATTTTCCACAGCTGCTACTTGTTCGA GTACAAAAGGTGTTTGGCCACATGTCAAATAGCAGATTTGATATGAAGTCAGGATATTTTTTATTTTGTGATATATCTGT GGTATTTGTTTTTCCAGCGACACTTCGCGTTAGGCGATTATGAGCTTAAATAAGCACTTGTTTTTATTCACATATTTTA TTTAGCTTTGGGGTCAACGCTAGAGAGAGAATAGAAATGACTGTGCTGTTTAAATATTTGTGAGACTAGGACAAAATATG AATAAGAAATGGAATCTTAAAACACCCCTCTGTGATAAATGAAAGATAATTCTGGAACCTGAGACAGATTTCCCATTGG CTTCTTATCAAGTCAATTTTTTTCTCTTTAGATTTAACTAATCGCTTTCTGCCAGATATAAGATCATGTAGGACTGTCT ATATTTCCCTTATTCATACATTTGTTTATATGATTCATCAGTTCGTTGTTTCATACCAATTTGAGTCTTTTTTTTAAAT ATATCTGTGATCCTTTGTTCTTGTATATTATTTTACTGAGATAACTGCCTCTTCAAGTACAATGTACATTAAGTT GTGGTAGGAAAAGTGTGGGAAAATACAGCCAGGAATATCAGGTTGATCTCATGCATTTGATTTTAACCTTACAGCATTCC GGTAGGACACCATTAACATGGACAACGTGAACCTCCGCGGAGTGGGTCATATGACACCAGGTCCTGTATCCGTTGTAT TACCTGAGGTCGTGAACCTCCATGCCCTCATCTCTGATAGAGATGATTTGTACATTCGCTCAGCTTTGACATAAGT AGACTCTGGGGAGAGTGGGTAGACTACATTTTTCCCTGATACTGAAAAGCAAAGGATATAGAGAGAAAAGTGAAGCGGGAT CTGGCACTTCATCAGTTAAATATGCTGAATGTTGTTTACTTACCCTTCCGTGACGAGGGAGACCTGTGACTAACGTAGA CCAACCTCAGCCTTGCTAGAACAAAAGCCTCCAACCCACTCGTAAAAAAGGTAATCTACTGTTTCCCTGTCTTTATGT AACCATAATTGCTAAAGCTCAGCAGTCAGTGGCAGTGAATTTGTTCTGATAATGCTGTGCAAAAATGTGTGTTCCAGGG TTCATTTCTGTGTGTTATGATGTGAAATGGACAGATTAGAAATGACAGAAAACATGATACAGTAGGATGGCAATCTCTTT ATGTTGTCACTTTAGCTTTGCTGTCGGCTCTGGAATTTGATTTGTTAGGTTTCATCACCAGTGTACTGTTTATCAGCTGC GCTGCCATTTTTGAATGTTGAGTGTCTTTGATCAATCGGCTACCCTCAGCAGTGTGTTGTAAGAAACAAAGGTAATCT TTTGTTCCTCACTTTTTCATGGAAATGTCCACGTCCTCATGTTTTCATGACTGTACAATTTGTATATTATAAAATATTATTAT TTAATGTGCACCTGTGGTGTGTTTCTTTTTAGATGAATTTTAAAACCAATGCATTTTGCCATGTTTGGGGTCAATCTTA AACTCAATCATTACCAACTACACATTTCACTCATCAGTGGTCTTTCAATTTTTCAAGTCTCTGTAAAGATTTATGTG CAACCTTCAATGCTTAGATTCCGTAAACACAAAATGTTCCATTAGATAGTAGAATCACATGGATGGTTGAACATGACA TTGGCCAGTGTGAAAAACAAGTGTGAGACATGTTTTGTTCAAGTTCAGCTCAAGGGTCAAATTCAGACTCAGAAAATCTA TTCCTGTTTGAATTTAAGCACTTCTCTGTAGTTGGTATTACACTTCCCCTGATGCAGGTTGTAACAGGCTTTGCAG

GTGTGGCTACCTTGCACGCACTGAATAAATGTAATTCAACTGCTGAAAACCCCTCTCACTTGCTGTCCAACAGATTTTCTC  
ATGGAGTTHTTTCATTCAAAGGGTTHTTTTCAGTACATTTATCTAAAACCCATTAATAACGGTGACCTTTTAATTCAAATTTT  
CTCAACAGACACTGAGTTTGCAAAACATTGGGAACACCTTCTAATACTAGTTCACCTCCTTTTACCCTCAGAACAGC  
TTCATTTTGTCAGGGCATGGACTTTACAAGGTGTCAAGCGTTCACAGGGATGCTGGCCCATGACTCCAATTCTTTCCAC  
AGTTGTGTCAAGTTGGCTGGATGTCTTTGGGTGGTGACCATTCTTGATACACACGGGAAAACATTTGTGCGTGAAAAAC  
CCAGCAGCGTTGCAGTTCTTGACACACTCAAACCGGTGCGCCTGGCACCTACTACCATAACCGGTCAAAGGCACTTAA  
TCTTTTTGGTCTTGCCATTTCAGCTCTGAATGGCACACATACACAATCCATGTCTCGATTGTCTCAAGGCTTAAAAATC  
CTTCTTAACTGTCTCCTCCCTCATCAACACTGATTTTAGTGGATTTAACAAATTCATCAGTAAGGGATCATAGCT  
TTCACCTGGTCACTCTGTGATGAAAGAGCAGGTGTCTCAATGTTTTGTACACTCGGTGTATATTGAGAGAATTGGTTC  
AGAATGGGAATTAATGAAAGAACCATCTAATACACACATATTTATCTCCTTTCCGCCACCAGTTGGTGCATTTTAAAT  
ACTCGATCTTGTATATTATTTAGGTCATTTTATTCACAATCCCTTATCCAAACGGCTTGCTCATTTACCTAGCTCT  
TATCAATGTGTAATTAACAGTGCATGGAGAACGGTGTATTTCTATCGGGGAAAAGAAAGTAGATGTTGTTCCACTTGG  
AACCGACAGGTTGTTGGACCTTATTCATCGTTTTATCATGTGTAAGGTGGCGTAATTTAGAGGGAAAATAATCAAGGT  
AGAATTCGGCATATCTGTAGACACCTCCACCACCTTCATTTCTTACATCTTCACCCAAAACGAATAGCGGTTGAAT  
AACATGCTATTCTCAAGTTCAAGGTGAGAATACCCGTAGAGCTAAAGGTGCATAAAAAGGGAATTACATTTTATTACAC  
ATGCTTAACCTCGGTCGGAATCGGCCCCAAGTGAAGGGTCTTGTAGGTGGCTTGGAGTGCTGAAAGAATGTAAGA  
GGTAATGCAGAAAACATTAAGCCCTCACAGCTACAGTATAAGGACTCCATTGTTGGATCGACCTGAGTGTGAAATG  
TAGCCATGCGCTTACGACAATGTCATTTTTAGGCGGCACAGGGGTAAAAAACGAACTATTGTTTAAAATCTGTC  
ATATCTGCTTATTACATTTTCAATTACAGTTGATCAATGTATAGGCATTATGCTGTGTAATTGAAATACATTACGTGGGC  
CCCATGTGTTACAAAAATCATGGTAATGAAAGCAAGCGTATTTCCGTAGAGTTTACGGTCAGGGGTGATCTATACATCA  
TGAGAGCTAGGAGCCTGGGGAGAACAGGGTCATTTAATGTGGGCTATGAAACAACACCACATTATTTCCATGTTGT  
CACTACAGGAAACGTTAATAGATCTTAAATGACCAAGGGGACGAGGTGGACCCTAGAGTGCAAAAATCTCTCATTTC  
GCCGTCAGTTATAGTATTGAAACAAATGACTTTCGGCTTAAAGCGCTGTGGCCCATGGGGTTACCACCTAAGACCTGAAC  
TGATGTTGGGTTTGGGATAAAACCTGCTGAATGTGGCATACTGAATGTCTGGAGAATTTGGTGTATTTGCATTAAGATGG  
GAATTTATCAGACTAAATCTTTATATTTGTAATGATACGCCAAGGTTAATTTAAGGAATATCATTCTGTGCACAGAGG  
GCCATAAAGGTTAATTTGATTTACTGCAAACTGTAGAGGATACCCAACTGTCTACGCAACCAGATCACTTCATCATTTC  
TGTCTCTACATTTGTGTACTGTTATTTTTACTGTTTTTCTCATTAGTTTGTCTGTATACCCTCAAACCTCACTCT  
GGACCTCGCAGCCAGCACCATTTGCTTTTTTTCTCCATTGTTCCCTCTAACTAGGAACTGATTTAGACCTAGGACACCA  
GTTGGATGCAATTAATTTACAGTAGAACAGAAAGCCAGCAGCGCTGGACCTCATAGGGTAAGATTGAATACCGCTGT  
GTCATACACTCCATCAGAAACATGTCAATTCACCTCAAGTAACACTGATAGATCCTAGTGGTGTGATGTGATCACTTGC  
TCATCTGGTTGGATGTACCTACCTCTGATGCTGCTGATGACTCAGCAAGAAATGCATATTTGTCTGCATTAACACT  
TCATGGTCTTATAAGGACCTTTCAAAGTATCAACATACATAAATCAGCAAAAAAGAAACGTCCTCTCACTGTCAACT  
GCGTTTATTTTTCAGCAAGCTTATGTGTAATATTTGTATGAACATAAGATTCAACAACCTGAGACACAAACCGAACAGTT  
CCACAGACGTGACTAACAGAATGGAATAATGTGTCTCTGAAACAAAGGGGGGTTCAAAAATCAAAGTCAAGTATCTGGTGT  
GCCACAGCTGCATTAAGTACTGCAGTACTCCTTTTTTATTTAATCAGGCAAAATCAGTTAAGAACAAATCTTATTTTCAA  
TGAAGACCTAGGAACAGTGGGTTACTGCTTTGGTCAGGGGCAGAACGACAGATTTTTTTTTTACCTTGTGACTCAGG  
ATTCGATCTTGGCCTTTCGTTTTACTAGTCCAAGCTCTGATTAACCATTAGGCTACCCTGTCCTCTTATGACTGAC  
CAGATTTGCCAGTCTTACTGTGAGATGTTACCCCACTCTTCCACCAAGGCATCTGCCGGACATTTCTGGGGGAATGGC  
CCAAACCTCACCTCCGATCCAACAGGTCCAGACGTGCTCAATGGGATTGAGATCAGGGCTCTTCGCTGGCCATGGCA  
GAACACTGACATTCCTGTCTTGGCAAGAAATCACGCACAGAACGAGCAGTATGGCTGGTGGCATTGTCATGCTGGAAGGT  
ATGTCAGGATGAGCCTGCAGGAAGGTACCACATGAGGGAGGAGGATGCTTCCACACGGTTTCAGATTGCTGCAATGA  
CAACAAGCTCAGTCCGATGATGCTGTGACACACCGCCAGACCATGACGGACCCCTCCACTCCAATCGATCCTGCTCC  
ATAGTACAGGCTCAGTGTACGCTCATCTCCTCGACGATAAACACGAATCCGACCATCACCCCTGGTGAGACAAAACCG  
CGACTCGTCAGTGAAGAGCATTTTTGCCAGTCTTCTGTCAGCCAGCCAGCGGTGGGTTTGTGCCCATGTTAGTTGTT  
GCCGGTGATGTCGTTGAGGACCTGCCTTACAACAGGCCCTACAAGCCCTCAGTCCAGCATCTCTCAGCCTATTGTGGACA  
GTCGTGAGCACTGATGGAGGATTGTGCGTTTCTGGTGTAACTTGGGCAGTGTGTTGTGCCATCTGTACCTGTCCCGCAG  
GTGTGATGTTCCGATGATCAATCTCTGTCATGTGTTGTACACGTAATGTCGACCATGCGAGGATGATCAGCTGTCCG  
CCCTGTAGCGCTGTCTTAGGCCTCTCAGATACGGACATTGCAATTTATGCCCCTGGCCACATCTGCAGTCCTCATGCT  
CCTTGACAGCATACCTAAGGCAGTTCACGCAGATGAGCAGGGACCTGGGCATCTTTCTTTTGGTGTTTTTCAGAGTCA  
TAGAAAGCAGCATCTTGTGTCCTAAGTTTTCATAACTGTGACTGTAATTTGCTTCCATGCTGTAGGCTGTAGTGTGTA  
CGACCGTTCCACAGGTTTCATTAATTGTTTGTGGTTTCAATGAACAAGCATGGGGAACCTGTTTAAACCTTTACAATGAAGA  
TCTGTGAAGTTATTTGGATTTTACAATGATCTTTGAAGACAGGGTCTGAAAAAGGGATGTTTATTTTGTGAGTTT  
TATAGATGACCTATGTCATCACTCTTACTATCACTCCAATCTAACCACACTAAATGAAAGTATTGCGTACCAAGAGGC  
AATAAGTTTGAATTAATGATTGATTCACCAGAAGTCTACTCATTAGCATGAAAGAGAACTCCAGAGCAGTGAATATGG  
CTCATTATCAGTATGCCTCATGTTTGTGAGTGGTGTATAACCATTTGCTGCGCTGTGTATAAGTCAACAGGCTCTTT  
TCTCCACTTACACTGCGTTTTGAGATTAACCACATCAACATAAACAATTAACCTGTGTACGCCAACTCACCCCTTA  
TCGGACCGCTCAGGCTTTAAACTGTAAATTAATTAATAACCTTGTCAATTTCTAATTAGCTCCTTTCCAGGAGGAC  
AAATGCGTGTGTCAGCACCTCCATTTTGTGCACACTTGTATGACTTTTGTCTTTGAGTTTATTGGTTCATTAGAGACGCTC  
TATGAAAACATGCTGTCTCATGCTGATGAGGATGTCAGTGCATTTGTGGAGTGATCTAGAGGGTCTTTCAGCTCTGG  
TGAGTGGGTTTATATTCAGTCAAGCTAATGTCAATTTGTTCAGCCTCACTGAACAAAGGAGCCATAAAGAGACAGTTGAA  
TGATTTATTAGGTTTAAACAGTGGTAGATTCAGATATTTGGGTGTAGATTGGATTGAAGGACCATGGGTCAGAGCCTGT  
GTGTTGACAGGTTGGGCTGGTGGTGGTGGTGGTAGATTGGTCCAGAGAGGATCTCCCTCAGATGATTAAGTGTAGGATA  
AGACAAACAAAACACAGAGGTTAGAAAATGTGTATACCTAGTGTGTTCCATAGCTGCATGATCAATGATCAATGATA  
CAGAAGACCAACTCACTCAGCCCTCAGATAAATGATCCGATGATGACAACCTATTTATCTCACCTGAGGATTTGAC  
GCAACAGTGAAGCGCACGTCATTGAGAGATGTGTCATCCAGGCCGACTGGTATTCTCCCATCTTTGGTCTCGATGCCAC  
AGATTCCTCCATCACCACAATCCTGGTCCAGAGGCTGACTCGCCATAGTCCAGGCCGGGCTGTGAGGGTGGGGTTG  
CTGCTGACGCGAAGCTGATGTTGTTGGCGGCTGTGTCGTCACCGAACGACTCTGGTGGGGCTCCACACGACGCTGGAA  
GGAAGTCAGCACACCCCTGGGGCAATAGTGAGGGTCCGACAGTCCAAAGCTGGGAGAGGAAGAGAGAGAGGCATA  
GAGGGAAGACGTCAGATGGAATAATTTACAGTACAGCAGTCTGGAATGAGGTTTGACCATAGCTTTGAGACAGAGA

AAAGAGGCACATTATGTAGAGTGTAGAAAATGGGACATGGAATAACATCTCACTGCAGTTTGAAGATGCAGGGTTTAAAGTC  
 AATTTGTGTCTACCTTGAGCAATGAAATAGGACTGTTTTGTGTGCTGTTTGTCTATACAAGACCAAGGTAATGTTACTT  
 AAGCATCAACTCGGTAGCATGCATACAGTGCATAGTAAGTAACTGGCTCGCTAGTACTATATAGTATCATACT  
 CAGATACAAAATAACAGCAGCCATCTATTGGCTGGGCATCTCGTAACAAGGACGATAAAGAAGCATGTTGTTAAGGA  
 TGACATCAGGATGCATTACAGCTTTGATTTTGTTCACAGGTAAGCAACATTTACACCTTTATACTGATTAAGGACATAG  
 ATGGATAGATATACACAACAAAAAACGATATATATGGGAGGCAGGCAAAATACCTTTCAGTGCAGATGTGTAAGACAGAT  
 TGACAGGGTTGAGACAATTAATTGTAATTTATCTTAATGTTATTTTTGTGTTTGCAGGTGCAGTATCCTGACTCTATGCA  
 GCCAGGTCCCATCTACTTTTTAACTCCTCGCAAGTGTGGCTTGTGTTGGTGTCTGCTGTGAAGGAATATCACAGGTCAACT  
 ACTTGATTGATGAAGGCTTGTATCCAGCAAAGGCAGCAGCGCAGTCACTCAACTACATGCACCGTTTTCTTTACCAACTAT  
 CGAGTTGGGAAAACACATGTGGACCTGAATTGTGATAACTGCAGTGGCCAAAACAAGAACAAGTTTGTGCTCTGGTATTTG  
 TACCAGGCAGACCATGCACAAGCTCCACCACAGTCTGGACCCAGACTGGTGTCTTTGGCCTCATCAAGCAGCGCTTCAAAA  
 AGACCAGAATGAACACTGAGATTGCTGCTGTTGTGAAGGACAGCACTGTGACAGGGGTCAACATCCCAAAGTGGTTGGAC  
 TGGAGGATGGTACGGTGTGGTGGAAAGCTATGGCTGGCAACAACACCTGACTCAGATCAAGCAGTACCGGCACCTCAGG  
 TGAATATCATTTTTCAATTGCATTGTATGAGGTTATTTCTATCTAAACTGGGAGGTGAATTGATGTTGTGAAGGTTGTAA  
 TGTATTTTTAGTTATTTCTTGTGTTTACAGCTTTGATGCTCTGGAGCCTGGTGTGTCGCCAAGGAGAGTTTCAGACTCAGT  
 CGGGACCAGGTTTACAGTGTGCGCAACGCTGCATCTTCTCCATAGATGGTCTGACTGTACAAGCAGCACCTGGAC  
 TGGACACAGCTAGCAAACTATATTTTTGAGAAGTACAGGGTGTGTTGCGACAAAGAGGCTATGGACATCATATGTTGCTT  
 GCACAAAAGTCAAGGACAGGACAGAAACAGACTCTCGAATATAGATTTCCCTTGTTCATGCGTGGTTCGGATGGTCCAGT  
 CATCAGCACTATCTGCAGTTCCTCTATTCAAATGACTCTCTCCTAACACTGCTGCTACTATTTTTTATATCTGCT  
 GCTCAGCCACTTTACCCTGATTGTATGCATATACTACCTCGTCTATCACTTTTCGTTATGATATGGTTTGTGTACATAC  
 TGTATATTTTTATTGATATTGACACTATCCATTTATGCTATTGCAAGTAACCATTTGGCTGTACCTTTTACACCTTCTGTA  
 GAGACCCATCCACTTAGTAAAATATGATATATATCATGTGTAACATGATTTTTGTGACATACAACAATATCATGTGGCC  
 GTATCATGTGTCACCACAAAATATATGGAGCATGCATGTTTATGACTGTACATGTGCAGTCACTCAGTGTGCAT  
 GGCCTTAACTTATGATGGAATACATGTGATAAGTCCGCTGTGTAACAGTATATAAAGTATGCTAATGTTACTGGTGTAA  
 GGCATTTTTGGCAGTGGTGTAAAGTCTTTAAAGTATTTTTTGGGGGTATCTGTACATTACTTTATCATTTATATTTTTGG  
 AAATTTTACTTCACTACATTTCCATAAAGAAAATAATGTACTTTTTACTCCATACATTTTTCTGATACCCAAAAGTACTC  
 GTTACATTTTTTACAGGAAAATTTGTCCAATTCACACACTTATCAAGAGAACATCCCTAGTCACTCCCTACTGCATTTGATCT  
 GGCAGACTCACTAAACATAAATGCTTCGTTTGTAAATTTGTCTGAGTGTGCCCTCTGGCTATCTGTCAAAAATAAATTACAA  
 ATTTGGGCCATCTGGTTTAAATATAAGGAATTTGAAATTTATTTATTTTACTTTTGTACTTAAAGTACATTTTAGCATTT  
 AATTTACTTGACATTAAGTATTTTTAAACTAAATCTTTTGTCAAGTAATATTTTTACTGGATGACTTACCTTAAATAG  
 AAAATGACTGAAGTAAAAGTATGTTTACATTTACTCAAGTATGACAAATTTGTACTTTTTATCACCACCTGGATGGCTGG  
 GGGTTATAGAATTTATTTACATGACCATCAATTTAGACAAGTGTGATCTAACACTTATAAAAATATTTTTATCTAGACA  
 CTTTGTTTACCTGGAAATTTTCCCTTATGTAGGCTACTACTTTTTGGTCTTTACTACACTACACACTGTTTAGCACATGAC  
 CTCACATGTGAATCCTTAAAGAGATGGGTGGGGCTGATTTAAAGGGGTGTGAACAATGCTGAATGGGTGTAGACAAAGGA  
 GAGCTCTCCAGTAGCACAAAACATTTATAGGCCCTTTTCTCAAAAGTGAGTTTATCAACTATCAAAGCAGAATTCCTTT  
 CCCATGTTTCTCAAAAATGTAGTGTATGATATACCATTTTTGTAGCTCTGAGTCTCTACTTTTTACTCATGTAAAAAAA  
 ACATTTCAAATGTTGCTACATAGAAGCAGAATCTAGGTTGTGAGTCACTTTTATCATCACTATAGTTGAAATGCGCTTTTAC  
 AGTTAAACCTGGGAAATATGATTATTTCCAATTTGTCTACATTGAGCAATGTGATAAGCCGATATGAGGCATGTTGTTT  
 TAGTCTGTACATACAATCCAGTGTGAGACTCAATGGTGTACAAGAAGCTCCTATCTTCGTCCTTAGCGCAGATCAAGCGA  
 ATGCCATTCAGGGCAGTATCATCCATACCGTACTGTTCCGACTCCACCTGAGAGAAGGTTAATGGACATATGCTAGCATT  
 AGCTCAAACAGAAGATGGTCTCGTAATACAAAATGTGTTGATCATGTTTGGTAACGGATCAACACCACAAGTACATTT  
 TGATTACATCAAATTTAGGATTTGAATTTGTGTAGAAAAAATTTCAAATAAATGGGCTATTTGAAAATAGGCTTTTTGGCC  
 ACAGGGGACTGGAATTTAATCCCTGAATTTGACTAAATGAAAGAAATGCTTTCCAACCTGGTAGATGTTGAAATGTATGA  
 AGGACCCCTTGTTCCTGCGGAGCATGAACCCACGGCGAAGAACTTACCCGGAGCATGAACCCACGGCAAAGAACTTAC  
 CCGGAGCATGAACCCACGGCAAAGAACTTACCCGGAGCATGAACCCACGGCAAAGAACTTGTGCGGACACATCTCAGG  
 CCAGTCCAGTTCCCAAACCTGCTCTCCATTGGGCACGGTGAAGGAGGAGGTGTAAGGCCTAGCGCTGTATGGATACCAG  
 CACGCTCCACATAGGCTGCTCCTCGGGCAATATAGCAAGGCATGACCCAAGGGCCAGCACAGCCAGGAAGGACAGAGCA  
 GTGAACAGAGGGGTAGTCATGTTGACAGAAAGTCACTCTCATCCACAGAAGGGATGGAACAAAAGGCAGTGAACCTTTATAG  
 CCTTCTCACTACGCTCCAAAATGGTGTCTCCACTGTTATCAGTATTAATCATTTACAACACTGTGGTCTGGCCAT  
 GGAAGAGGCAGGTTGATAGGACTAGAGTTAAAAATAAATACTGTCAGTACTTCAAAGCAGTGGTATGCTGCTCACT  
 CAATGAAGTGTCAATAATTTGCTCTACCAAAGTATGACCCATGTTGTATATTAGTAATTTGACTGTTTACATGCTATGAC  
 GTAAAGAAAACGTTAATTTGTCAGAAACCAGGTCCAAAGCTGATTTTTTTTTTGGCGCGACAGAGTGAACCAAAAAATAA  
 GGAACATATGTTAATAGTGGTCTTTATATCAAAAATAGATCAGTTAATTTACAATGATTTCAAATGTCAATTTTCTTAC  
 ACCTCATATAAAGAGCCTTTCTGTTATCGCTGTGCATGTGCAGTCCCAAGGCAACTGAAGTGAATGTTTTCATTTGACA  
 GGACTTGCAATGAGTAGCTTTTTCTCENNENNNNNNNNNNNNNNNNNNNNNNNNNNNNNNNNNNNNNNNNNNNNNNNNN  
 NNNNNNNNNNNNNNNNNNNNNNNNNNNNNNNNNNNNNNNNNNNNNNNNNNNNNNNNNNNNNNNNNNNNNNNNNNN  
 ATGCAGTCTATCACAATGCCATCCGTTTTGTCTACTAAAGCCCATATACTACTACATCACTGCAACCTGCATGCTCTCGTTG  
 GCTGGCCCTCACTTCAATTCGTTGCCAAACCCACTGGCTACAGGTCACTATAAGTCCCTGCTAGGTAAGCCCCGCCCT  
 TATCGCAGCTCACTGGTACCATAGCAGCACCCACCGTAGAACACGCTCCAGAAGGTATATTTCACTGGTCACCCCCAA  
 AGCCAATTCCTCCTTTGGCCGCCTTTCCTTTCCGGTCTCTGCTGCCAATGACTGGAACGAAGTCAAAAATCACTGAAG  
 CTGTAATTTGTAATTACTTCGCCACTACGGCCTATTTATGCTTACCTCCCTAATCTTACCTCATTTGCACACACTGTA  
 TTTTTTTGCAAAAATATGTCAAACACAATATAGAAAAATGCCTTAGCCTTATCTATTTACACAGCCTAAAGCCTGCACCTGAA  
 ACAGTAAAATATGCTACATATGAACTTCTTGAAGTGGAAAATACAATACATACATAAAAATCTCTGCTCAATTTGTGTGA  
 TAATGTTGTGACTTACTGTTTCTTCCACCAGTAGTAAACTCTCCTCCAATAGCCATGGCTACACCAATGAAAAGGGAAAC  
 ACACCCCATATTTGCCATTTTAAACCATTTAGCATCCAGGCTGAGGTATCTGGGAATGGAATTTATGTAACAAGACATC  
 AACTCTACCACAAGGCTGCTACCAATCCAGTAACTTCAAATCTATTGACATTTTTCATGAAAACACTACTATAAGCAGAA  
 TGTTCCTCCCTCTTCTGTACCCCTCTCCCTACATTTCCATTTCAACTGTCTCCCTCCCTCCAGACCACAACACTCT  
 CTCTCTTCCCCAGGCTCTCACCACAGACCCTCCAGTGGTTCATCTAGGCTGGGGTGTCAACCATGCAGCTTACA  
 CTCTCCCTCTCTGAGGCTGAACCTTAGGTAGGAGTGGAGCTGGTAGCTCCAGTCCCGTTAGCCAGTGTGTGCTGGA

GGTCACGGCTGTGGTGGTCTCCCGCCCGTCTCTCAGCCAGCTCACCCCTACCTCCTGAGGGTAGAAGCCTAGAACGCTGC  
 ACTCCAGCATGGACAGCTCCCCGTAGCGAGAGGGCTTGGTCAGGCGGACTTTGACAATGGGAGGCACCTGGGACATAGGAT  
 GACGTAGAAAAGAACTGTGTCTGTCTGATGAAAGTCCCGCGCTGAAACATCAACATTTTAAATAATGTTGCAAAATCTACTA  
 AGAAAAGAAAGAAACATAAAAATGACTTACCTATTTCCAAAGTGCCTAGTTTGAAGAATATTGCACTGTATCGGC  
 ATAGTCTCCACTTCTGCTTTCTTATAGCCATTTTCCAAAGCTTGGCTGTTGTAGCGATCTGCATTGCGTATGCCAAACTC  
 CCCCCAACCCACATACTTCTGAACCTGGAGTCATAGATGGTGGTCAATTTTGGTTGAATATGTTTTTACAAAAGTAGA  
 TCATATTGTCAATGGTGTCTATCATATTACAGTCAACTATCCCCGGAAGTGGTACCCACCTGAAAAAATAATATATAT  
 AATTTGGACCGTTGTATCCCTTTCCATGTAGTTATGCAATGAGGTACTCAAAAAATATGTTGTTGCTTATTGATTCAG  
 GTAATCTCCTTATCATTTGCCTTTGTGGAGTCGTTATACTGTATTGTTACAAAAGATCTGTCAACTTAATTTGATACATT  
 CTTCAATAATAGAGTATGTTAGACACATCATGCATTTTCATCAAAAAATAGACTGACTCACCTGCTGGTGTGGCCAGGT  
 CTGAAATGACAGAAAAGTCCAGCCATCCAATAGACCCAGCAGAGCCATGGTGTATCCAGTCACTCAGATAGAGACAAAATA  
 ACTACACTGAAGTCTACCAGTTGAAGCAGCTATCATTGACAGGTACATCCCAATGTGTGACGAACAAAATAAGCTCCAC  
 CTTGGTATCCAATAAGGTCCCCCTTGCTATACTGCTGTAACCTGTTTCTGATATTGAGTGAAAATGGTGTGTTTTCCCT  
 CACCCTCAATTTTTTTTATATGTTTTGTACGGTAAGTGATAATCTGTGGAATGAGTTGAAGTTAATATCAGCCCTCACA  
 TGGACAGAATGAGATATTTCTGGTTCCGGTGGTGTGTAGCAAAAATATACATTTCTCATATGGTTGCCCTGAGTCACTG  
 CATTATCTTTGTGCAACAGTAACCAACCCTTCTTTTATACAAAAGTATAATAGCCAGGGCTAACCATGTGGCAGGTTT  
 ACAAATGAGAAGTACACCTAAGGGAAGAAATCACCACCAAGAATAATAGTAAACAAGTATTTCTTATTTTTCATGTAATAC  
 AGAAATGTGACATTTAAATAAATGTTAGTGCCTCATTTGCCAAAGCAAAAAAGAAATGTCCCAATCTGAAAAACAATAAG  
 GAGTATTTTATTAAGATTATTGATCAAAATGTAGGAAATAGTGAACCTGCATTATATTGGTCGCCAGCGTAGTTGTAGGTTG  
 CTAATATGATAAATGTCCTTGGTATTGTTGCATGGAGCCCTTGCTGTATCGCTGATAGCTGATTGTTGCCTATGTTCTT  
 AAGGCCAACCCAGACTCTTGGCTTTTTTGATAAACAGACTCCTGTGCTACTCCAACCACTCCTAGAGTCAACCTCC  
 AACACACTGCTGTCTCCACAGTCTGGTGGTCCGTGTGCATTTCAACCTCTGTGGACATATAGTGAAGAAAACAATTCAT  
 TTGTTAGTGTCCCTAATACAGTATCAATAACATCCCACCTTCTCTGCGTCCGTACCCCTACAGTATAAGTTCACACCCAGCA  
 GTGACTCACCCAGATCCTGGTGGAGGGTTCCTGACCCGCTGACGTGACCCACACTACAGGAGTAGATGTCCTCCCTCTGGA  
 GGTGTGATGCTCAGGTAGGAGAAGATCCTGAAGCTGAAGTCTTCAATGGAGTAGTACTGGGTCTGAATGATGGTCTCTC  
 TGCCACCGGCTGCTCGTTCCTGGTCCAAGTCACATCCACGGGTGTTGGGTGGAATCACTGACCCGGCAGATGAGTGTGT  
 TGGGACCCCGAGCTCCACCTCTCTCTGGGAGTATATGTTGGGAGGTGGGCACCTCTGTGGGGGGGGGATTCTAATTTG  
 GGCCTCCTTCATCTCTCACCTCGGTGACCCGCAACCGATGAGTGGTAGAGTGATCGAGGAGAGTGTCAATTCGTTAT  
 TATGCTGCATGAATTTTCATCAATAACCTGCACCTTTTTTGTCCATTTGTTGTGCGCTCCCGAGTGGCGATCAATCA  
 AAGTTATTTGTAGTGTGCCGAATACAACAGGTGTAGACCTTAAAGTTAAATGCTTACTTAAAAATGCACTGTGGTT  
 AGGGCTTGTAAGTAAAAAATAAATTTTTTTTTTAAAAATAGGTTATAGTTAAACAATAGATAAGAAAAAATAAACAATAAATG  
 ACTGAAAATAACAGTAGCGAGGCTATATACAGGTGGTACCAGTACAGAGTCAATGTGCAGGGGCACCGGTTAGTCGGGCT  
 AATTGAGGTAATATGTACATGTAGGATAGTGTTCACACCAGTCCAAACGAAGTGAACTAAGGGCTAAATGCACCAGAG  
 TTCGAAAAAACCGCACCAACCAATTTGTTATATAAGACACCTTAGTCCACTGCGCCACCAGGATGGAGCTAGCATTTTA  
 AGGCATACAAAGCTGTTAATTTTAGTCTACTCAACAGACCCCATTTCAAAGAAAACAAGTACTCATTAAGATCAGGTGT  
 GGTCAATTAATGGGCATGGCCATAACACCTGAACACACTTAACAAGATAGAGGATAGAGTGTTTTATGACGCTGAGAAC  
 AGAATGTATATGTTTCTAAATAACATTTATAGAACGTAAACATTTTCTGTGGTTTTTAAATGGAATGTTTAAACAT  
 TCTCTGTACAATGAGAACGTGGCAAAAATAGAACCATGAGGAAAAGTTATACTGAAGTACTGAAATTTCCACACAGGAATG  
 TTGTTTCTTAACCTTCTCTGAACATTTTGAAGACATTTCCCAATATCAAACCACTTTGTCAAGTCTTTTAAATGTGCTGAG  
 AATGTTCCAAAGCCAAAGCAACTATCCTGCACCATTCCAGAAAGTGTGGGAAGGTTGTATGCAAAAATAACCATAGGACA  
 ACCACACTCTCACCGAGCTTAAGAAACATTTCTCAGAAATGGTTCTCAGATAATGTGTAGCTGGGGTGTGACTTTGCAG  
 AAACAGCACTCACCTATTGCCTCTGGCGGGCTCTTTTCTCCACAATGCAGCGGGGATGTTGTACTGGCAAGTTCGGAG  
 GGACCGTACACTCTCGTGAGGCAGTCTGGGTCAAGGGTCCACTCTGGGCGAAGTCTGACAGACCGGCTCTACCTGGT  
 AGGTAATGGGGTCAACGTAGAAGCTCATCTCCATCAAACCTCCAGTCAATACTCTCGTCTGGGACGTTTTTTTTGG  
 CAGAAGGTCAAAAACCGCAGCAAAATGTTTGCCTGTGTTCAATAACAGAAGTTGAGATGGAAAATGGCACATCTGACTGTC  
 TAGTACCATGCTTTGCCAAAAGGTACAAGAGATGTGAACGCAATATAAATTAATTTGGTTAGGCTTTTCTGTAAAATGTT  
 GTTTTAATAACAATGGGAACGTATATAAAGCAGCTGCTGCATCTATGGGTTTACGGAATAGAATAACGGAAACGCAGTAT  
 GGGTTAGCACTGCTAAAGGGATTCTTCCAAGCAAAAATAATTTCCAGTCTGGTTCTTTCTCTCTCTCTCTCTCTCTCTCTCT  
 TCTCATATGAAAAGAGTAAAAGTGGACTTACTTTGGCAGTGTGACAGTAGACAAAACCCAGTATAAAGCCAGGAACAC  
 TCTGCACCCCACTCAAGTGCATTTGCCAGTGGCCTTATCAGTAATGTTCCTGTTTCTGTGTTGACTTCCAAACAGTG  
 CTGCTGAAGGTGACTTCTCAATATCATCAGCCAATCATATCTTTTTATCTGGATGACACTGACGTTATTACTAGAGGTCG  
 ACCGATTAATCGGAATGGTCCATTAATTAGGGCCGATTTCAAGTTTTTCAATAACAATCGGAAATCGGTATTTTTGGACACC  
 TTTATTTAACTAGGCAAGTCAAGTAAAGAACACATTTCTATTTTCAATGTCCGCTTAGGAACGGTGGGTTAACTGCCTTGT  
 TCAGGGGCAGAATGACAGATTTTTACCTTGTGAGCTGGGGATTCAATCTTGCAACCTTACGGTTAACTAGTCCAACGCT  
 CTAACCACCTGCTTTACATTACACTCCACGAGGAGCCTGCCTGTTACGCAAAATGCAGTAAAAAGCCAAGGTAAGTTGCTA  
 GCTAGCATTAACCTTATCTTATAAAAAACAATCAATCAATCATAACTACTAGTTAACTACACATGGTTGATGATATTACT  
 AGTTTATCAGCCCTGCTGCGTTGCATATAAATCGTTAGGTTACGTTGGTCCAACGTTGATCCTAACCAATAAACATCAAT  
 GCCTCTCTTAAATCAATACACAAGTATATATTTTTTAAACCTGCATATTTAGTTAATATTTGCCTGCTAACATTAATTTCT  
 TTTAACTAGGGAATAATGTGTCATTTCTCTTGCACAGAGTCAAGGTTATATGCAGAAGTTTGGGCCGCTGGCTCGTTGGC  
 AACTGTGAAGACTATTTCTTCTTAAACAAGACAGCCGACTTTGCCAAACGGGGGATGATTTAAACAAAAGCGCATTTGCCGA  
 AAAAAACACAATCGTTGCACGACTGTATCTAACCATAAACATCAATGCCTTTCTTAAATCAATACACAGAAGTATATAT  
 TTTTAACTTGCATATTTAGCTAAAAGAAATCCAGTTAGCAGGCAATATAACCAGGTGAAATTTGTGCAAAACAGGGC  
 ACTGCGTTTCACTCCACCTGGCTGGCCCTTCTCTGAGGAAAGCAGTTCCTGCTGAGGAAAGCAGTTCCCGCTCAGCCACTG  
 TCGCTGCTTGGCACCCTAATGGTGAACAAGCTCCTCAGCAGCCAGGACAGCGGAGTCAATCACCACCTTCCGGAGA  
 CACCTGAAACCCCACTCTTTAAGGAATACCTAGGATAGGATAAAGTAAATCCTTCTAACCCTCCCTTAAATAT  
 TTAGATGCACTATTGTAAGTGGTGTCCACTGGATATCATAAGGTGAATGCACCATTTGTAAAGTGCCTCTGGATAAG  
 AGCTCTGCTAAATGACTTAAATGTAATGTAATGTGCACTTCTCTGCGTTTATTGCATGCAGAGTCAAGGATATATA  
 TGCAACAGTTTGGGCCGCTGACTTGTGCGAATAATTTGCCAGAAATTTACGTAATTTATGACATAACATGAAGGTTG  
 TGCAATGTAACAGGAATATTTAGACTTAGGGATGCCACCCATTAGATAAAAATATAGGACGGTTCCTGATTTCACTAAAAG

GAAAAATGTCACGTCCTGACCATAGTAAAGTTGTTATTTTCTATGGTAGAGTAGGTCAGAGCGTGACAGGGGGTGTGGTCT  
 GTTTTTGTATTTCTATGTTTCAGTTTCTAGTTTGTATTTCTATGTTGGTGTGGTGGGTTGATCTCCAATTGGAGGCAG  
 CTGATCTTTGTTACCTCTAATTTGGAGGTCATATTTATGTTGATGTTTTGCCACCTGTGTTGTGGGTGATATCTTTTG  
 AGTAGTGTGTTTTCTGTCTGCGTCACGGTTTTGTTGTTTTGCGTTTCAAGTATTTATGTTATTGATTTACGTTTACGGA  
 AATAATAAATATGTAGAACTACGAACACGCTGCATTTTGGTCCAATCCTTCAGACAGCCGTGACAGAAAAACGTTTTGT  
 ATCGAGATAAATGTTTCTGGATTCCGACCATATTAATGACCTAAGGCTCGTATTTCTGTGTGTTTATTATATATAAATTA  
 GTCTATGATTTGATAGAGCAGTCTGACTGAGCGGTGGTAGGCACCAGCAGGCTCGTAAGCATTCAATCAACAGCACTTT  
 CGTGCCTTTTGGCAGCAGCTCTTCGCTGTGCTTCAAGCATTGCGCTGTTATGACTTCAAGCCTATCAACTCCCAAGATT  
 AGGCTGGTGAACCGATGTGAAATGGCTAGCTAGTTAGCGGGGTGCGCGCTAATAGCGTTTCAAACATCACTCGCTCTGA  
 GACTTGGAGTAGTTGTTTCGCTTGCCTGCATGGGTAAACGCTGCTTCGAGGGTGGCTGTGTGCGATGTGTGCTGGTTCG  
 AGCCAGGTAGGAACGAGGAGAGGGACAGAAAGCTATACTGTTACACTGGCAATACTAAAGTGCCTATAAGAACATCCAAT  
 AGTCAAAGGTATATGAAATACAAATCGTATAGAGAGAAATAGTCCTATAAATCCTATAAATACTACAACCTAAAACTTCT  
 TACCTGGGAATATTGAAGACTCATGTTAAAAAGAACCACCAGCTTTCATATGTTCTCATGTTCTGAGCAAGGAACCTTACA  
 CGTTAGCTTTTTTACATGGCACATATGCACTTTTACTTCTCCAACACTTTGTTTTTGCATTATTTAAACCAAATTTGAAC  
 ATGTTTCATTAATTTATTTGAGGCTAAATTTGATTTTTATTGATGATTTATATTAAGTTAAAAAAGTGTAAATTCAGTATTG  
 TTGTAATTTGTCATTATTAACAATTTTTTTTTTTTTTTTTTTTTTAAATCGGCCGATTAATCGGTATCGGCTTTTTTGGTCTC  
 CAATAATCGGTATCGGCGTTGAAAAATCATAATCGGTGACCTCTAGTTATTACCATATCTATGGTTATTACATAGAAAA  
 CATAAGGCATTCTGAGCATGCATGGCACACCTTTTACACAACTAGGGTGTATCAAAGAGGTGAAACATGACAACTTTGC  
 AGATAGAACTCAATAAATAGCGCTGAGACATGACTCCCTATTCTGCATTCTACACAATACATTTCTATCTGAATGATCA  
 GCATCGCCCTGACATAGCCACGCTGACTGCTGCCACCTACTGTTGAGTCATGATCATTACAGTGTCTGCCCTTTATTG  
 TTCGTTAAACTGTACATCCAACCGGCTCACAACCGGACAGCCAGGGTAACCACGCCAGCCAGGACCTCCACATCCGGC  
 TTCTTCACTGCGGGATCGTCTTAGACCAGCCACCCGGACATTTGATAAAACTGTGGGTTTGCACAACCAAAGTATTTCTG  
 CAAAACTGTCAAGAACCTTCTCAGGTAAGTCTGCTGCTGCTGCTGCTGCTGCTGCTGCTGCTGCTGCTGCTGCTGCTGCTG  
 TGGCTCATCACCCTTTCAGTGGGCAAAATGTTACCTTTCATGATGGCCACTGGCAGCTGGAGAAGTGTCTTCTTACGGA  
 TTAATCCAGTTTCAACTGTACCAGGCAGACAGCATGTATGGTGTGTTGTGGGCGAGCGGTTTGTGTTGTGAAAAGAGT  
 GCCGGTGGTGGCAGTGGGGTTATGGTATGGGCAGTCATAAATACGGATAACGAACACAATTGCATTTTATCGATAGCA  
 ATTTGAATGCACAGCAGGAGGTTGGTGGTACCTTAATTGGGGAGAACGGGCTCGTGGTAATGACTGGAGCGGAATCAG  
 TGGAACGGTATCGAATACACCAAACACATGGTTTTCCAGCTGTTTGTATGCCATTTTCATTTTTTCAGTTCCGCTAATTATTA  
 TGAGCTGTCTCCCTCAGCAGTCTTCCATTCAATCAACAGCCATCACCTCCTGTTTTTCCAGCAGATAATGCACAGTCCCA  
 TGTCGAAGTTCTGCACATAAATTTCTGGAAGCTGAAATGACCCAGTCTTCCATGGCCTGCATACTCAGGATCCAGATGTC  
 CCCATTGAGCATGTTTGGGATGCTCAGATCGAGTGTACAACAGAGTGTTCAGTTCCCGCCAGTATCCAGAACTTCG  
 CACAGCCATTGAAGTGGAGTGGGACTACATTTCCACAGGCCACAATCAACAGCCTGAAAACGCGGGCATGAGGCAAATG  
 GTGGACACACCAGATACGGACTTGTTTCTGACCCATACCAACATATGCATATCTGTATTTCCAGTGAAATCCATAGGCT  
 AGGGCTAATTTATTTAAATGACTGATTTTTCAATTGACTGACTCCCTTATGTGAACGTAACTCAGTAAAACTTTTGAA  
 ATTTGTTGCATTCGGTGTGATATATATATATATATATATATATATATATATATATATATATATATATATATATATATAT  
 TTAATACTCAACAACTTACACACAATACCTCATAAATGACAACGCAAAAACAGGTTTATCAATTTTTACCAAATTTATAA  
 AATAAAAAAATACCTTATTTACATAAGTATTCAGACCTTTGCTATGAGACTCAAAATGAGCTCAGGTGCATCCTGTTTT  
 CCATTGATCATCCTTGAGATGTTTCTACTCCTTGATTTGGAGTCCACCTGTGGTAAATTCATTTGATTTGGACATGATTTA  
 GAAAAGCACACCTGTCTATATAAGGTCACAGTTGACAGTGCATGTGAGAGCAAAAACCAAGCCATGAGGTCCGAGGAA  
 TTGCTGTAGAGCTCCGAGATAGGATTTGTGTCGAGGCACAGATCTGGGGATTGGTACCAAAACATTTCTGCAGCATTGAA  
 GGTCTCCAAGAACACAGTGGCCTCCCTCATTTCTAAATGGAAGAAGTTTGAACCACCATGACTCTTCTTAGCGCTGGCC  
 GCCCGGCAACTGAGCATTTCAGGGAAGAAGGGCCTTGGTCAGAACCCGATGGTCACTCTGACAGTGTCTAGAGTTGTC  
 TGTGGAGATGGGAACTTCCAGAAGGACAACCTCTCTGCAGCACTCCACCAATCAGGCCTTTATGCTCGAGTGGCCA  
 GACAGAAGCCACTCTCAAAAGGCATGACAGCCGTTTGCAAAAGGGCCTTAGCGACTCTCAGACCATGAGAAAACAGAT  
 ATACCTTATTTACGTAAGTATTCAGACCTTTGCTATGAGACTCGAAATGAGCTCAGGTGCATCCTGTTTCCATTGATC  
 ATCCTTGATGTTTTCTACTCCTTGATTTGGAGTCCACCTGTGGCAAATTCATTTGATTGGACATGATTTAGAAAAGCACAC  
 CTGCTATATAAGGTCACAGTTGACAGTGCATGTGAGAGCAAAAACCAAGCCATGAGGTGCAAGGAATTTGTCGCTAGA  
 GCTTCGAGACAGGATTTGTGTCGAGGCACAGATATGGGGGAGAGTACCAAAAAGAAATATGCAGCATTTGAAGGTCCACAAG  
 AACAGTGCCTCCATCATTCTTACATAGGAGTTTGGAGTATCAAGGCTCTAACTAGAGCTGGCCCGGCCCAACTGTA  
 ACAATCAAGGGGAGAAATAGCCGTGGTCAAGGATGTGACCAAGATCCCAAAGGTCACCTCTGACAGAACTCTAGAGCTCCTC  
 TGTGAGATGGGAGAACCTTCCAGAAGTACAACCATCTGTGCAGCACCCCAACAATCAGTCTTTGTGGTAGAGTGGCCA  
 GATGGAAGGCACCTCTTAGTAAAAGGTACATGACAGCCTGCTTGGAGTTTGCAAAAGGCACCTAAAGACTCTGACCATA  
 AGAAACCAGATTCTCTGGTCTGATGACACTAAGATTGAACTCTTTGGCCTGAATGCCAAGTATCACATCTGGAGGAAACA  
 GGCACCATCCATACGGTGAAGCATGGTGGTGGCAGCATCATGCTGTGGGGATGTTTTTTCAGCGGCACAGAATGGGACACT  
 AGTTAGGATCAAGGCAAGATCAAAGTACAGAGTTCCTGGATGAAAACCTGCTCCAGAGCACTCTGGACCTCAGACTGGG  
 GAAAAGGTTACCTTCCAACAGGACAACCCCTAAGCATACAGCCAAGACAACGCAAGGACTGGCTTCCAGGACAAGTCTC  
 AATGCCCTTGAGTGGCCAGCAAGAGCCTGGACTTGAACCCGATCGAACATCTCTGGAGACTGAAAATAGCTGTGCAGC  
 AACGCTCCCCATCCAACCTAACAGAACTTGAAGGATCTGCAAAGAATAGGGAAAAACTCCAATACAGGTGTGCTAAGC  
 TTGTAGCGTCATACCAATAAGACTCGACTGTATTCATTGCCAAAGTTCTTCTAAGTACTGAGTCTAGGGTCTGAATAC  
 TTATGTAAATGTGACATTTTAAAAATATAAATTAGCAAATATTTCTAAAAAGCTGTTTTTGTCTTTGTCAATATGGGGTAT  
 TGTGTGTAGATTAAATTTGTTTCTCATCAATTTTCAAACGATGCTAACGTAACAAAATGTGCAAAAGGTCAAGGG  
 TCCGAATACTTTCCATAGGCATGTATAAATAGGGGTGACTGTGTATACATATTACAAACAAATAGAAAAGGCTTTATA  
 GAAGTCTCATTTTTAATATACAGTTTTTCAAATGACTGGCATCTTCTGAGCAGCAATCCAGTCAACCAGGAGGCAAAA  
 CAATGTTTCAAGACATGTTCTGGAATAAATAAGCATGACTAAGTGGAGGATAAATAGAGTATAAAAAGAAAAGCAAGACAGG  
 AAAATAGACTCACTGGTAGAAAGAAACATGATCATTGACCCTGAAATACAGTACTATACATCTATATACACACACTTT  
 CCTTAAAGAGATCTACAGCCTAGCTTCTATACATCTCATCTGGTGTATCTCTTGGTCCAAACTTCAACGTAGGATGTCT  
 GCTCTGTATTACCGTGATTTAACATCTAACACCAGGTTAGCTTACAAAGCGCATCATACTGTGACACTTTCTGTATTT  
 TGAAGTTCTATGTTGAAAACCTTGATGGCTGACATGCAAAACATTTGTGAACTGTATCAACAGTGGACTAACGAAACAAA

TACCAAATGATTGAGTGGAACTTCCTTTAAGCACAAACAGAATTGCAGACTGATCAGTTTCTATGACTGCTGTGATTAA  
GACTGCAGTGTCCACATCAAGAAACCTACTCCTTTCTGAGAAATGACAACTGGGCTGTTTCTTAATGGTAAGTGCCATA  
CATGTATGACAAATCTCACTGTCAAGAAAAAGAGTTTCAGTAGTTAGATCTCTTAAGAGGAACATATGGAATGAAATAA  
AATCTCCTGCTTGAACCTTTATGTCCAGCTGAATGTTGGTCTGTTAGCAGTAAGAACAGATGTAATAAATGAAACACAGA  
AAGCAACAACAAAAAGTACTGACTCGTGAACCTGCAGCTATAAGACTTGCAGAAAAGACATAACTACCGATCTGAAAAAT  
CAACCACTAGACAGTGACGGCCTCGTAGTGAGAGAACAGATAAGTGTAAAGCATTACAATTTCTCACTCCACATAGCTTTCT  
GGGAGGGCAAGTGGGTTTCTGCCATACTGCTTATACCCATTCAGTTCTTATCAATCTATGATTGCACATCAAGAAGTGT  
CCAACATGGGGCTGGGCAAACTCTCCACATCCTTTCTACTGCTCCTCAGTCTCCCTCTTTGGGGGATCGCCATAAAATTC  
TTCTTTATAAAAAGAAACGTAGATAAAATTTGACAAGTATTTACACAGGGAGGAGAGGGGATAACAAGGCATTTGTGTTGGGG  
GTCTTGAGCAGAGTCAGAGAGAGTTGGTCCGATCGGTTTCTGTCTGAACATTCGAGAGTGCCTTCTCTCCATAG  
CCATTGTAAGTGATAATTTGACGCTTCTGCGCTGTTTATTTCTGATAGTTTCAAAGCTATGAAGATGTCAGTGAAGCA  
GATATGCAATTTGTTGACACCACAACACAGTAAAGACTTGGATATACATTATCCTGAATGGTCATTTTCATAGGGAACGT  
CAGAGGCTCTCTCGTATTGTTACATTACCAACATTTTCGAGAATAAAGGCTCTAACATGGCAGCTGTTCTTAAACCTGGCT  
GAACCTCAATATGTTCTGGTCTTTCAGTATCCTTAGTGACCTTCACCGCTCCTCCACCTGCACACAAATCCACCATC  
ATCATTCATCTTGGGAGTGTTCGTGCTGGGGTGCCTTTTCGAGGGAGGGGCACTTTTTCCCTCCCTTGACTGCCCCAGGA  
GACGTCGTCTGGGGCTGCCGATGTCCTGAGCTCGACGGGGTTCCTCCCTCTCCACTGTCTCATCAACCCGAGTC  
TGATTCAGTGGTGTACAGAGGAGGAGTACGAGGAGGAGGAAGACTGAGCTGGAGCTGCTGCCCTGAGCGGGAGG  
GCTGGCGTGAAGCTCCACGCCACTGAGCTTCTCCGCTGCAAGAGAGACAAAGGGGTAATAGTCTTAGCATGTATCTCA  
ATGCTACATGCTACATGTGCAACAGCAGTTCTGCGAGCGTGTGGCTCTCACCTTGGGTTTCTGGGGTTTCTTGGCAGAG  
TTGAGCTGTCCGCTGACATCCTGCAACCTCCTCTCCAGCTCACTCTTCTCTCCAGGGCCAGTTCCTCTCTGGACTTGC  
GGGCCCCCTTTCTTCACTGTTACACACAGACAGGAAGACCGGTTCAAGGTTATATACTCAGCCACACATACATATCCT  
AACATTCATAGTAAAGACTGGTTACATTTGTATGGTATTAGTCAACCAGAGCGGTAGCATGTAGCGTTTATCACCAC  
AGCACCAGCTTGTAGCATCAGTTCTTTGTAGCATAACAAGGCATTAGCAAGTGTCTGCAGTGACAACATGATGCATTTAC  
ACCATACTAGTAAACCACAGCTAGCATCAGTATCATTGTTTCCCTCACCATAGGGCTTACGGGCTTCTTCCCTC  
AGGCACGTCATGACGTAGCGCTCCAGCTCGCGCAGCGTTCGACGGCTTGGAGCTCTCAAAGTCGATCTCGATCTCCTCGGG  
GTTGGTGTGCGCAGCGAGGGCTCGCGGGACTGGATGATGTGGACGACGCGGCCAGCTTTTCGCCAGGACGCTTGTGGA  
TGCCAGGCTCAGCTGGCGCTTCTCGTCTGACATGGGAGACGCTCCTCCTCCTCCTCGGAGTCATAGTGGGGCAGC  
ATGGAGAAGGCAGGCGGGGCGTAGTAGGGCATGGTAGCAGCTGGGACTTTTTGGTGTCTTAGGGAGAGGGAAAGCTGTT  
AGAGGCCATTCATAGTACTAGAGAAAATGTATGCAAACTTTCCAGCATGGAGCCCATTTTTTTCACGCCAACACTTGT  
GGGAACCAATATACATTTTGGAAATCATTCTTTCGACCCACCAATATAATGACAACATGACACTTACACTTACACTTTA  
CATCAACAAATCACCTTCAATTCATTACATATTCATCTCTTATCAAAATGAACTTGATATACTGCCCATACAATAATCT  
GTACTCTGCAAACCCACTGCAGTTTCTAGAGAGACACATGCAGGTCAAGTTGGAATTTGGATTGTGATGAAAGAGAGGAA  
GTAGAGAATAGTGTAAAGAACTTTAAAAAAGCGAAGCGAGGAAACAGAAAAGGTGGAAGGGAAGCAATGTGAAAGTCTA  
CAAAATGAGACTGAAACAAACAAGTAGAAGAAAGAAGACATGGATGACCGATGGAAGGATGAGTAAAGCAAAAGAGAA  
AGGTCGTGTTTGGGTCAGTGTGTGCTTACTTGTCTGCCCTTCTTCTTCCCGGGCCTCTCTTGCCTGTGAGGAGGCGGG  
AGCTGAGCTCCTGGATTTACTCTTCGTAGTCTCACCAGCTTGGCGGTGACGATCTCCAGTCTCCACCTCACCCTCAGGCG  
CGTGGGCGCTCCGCTTCGCTTCTCCGCTTCTTCTTCTTCTTCTTCTTCTTCTTCTTCTTCTTCTTCTTCTTCTTCTTCT  
TTGTTCTTGACGATTTGGGCCCTGGGAGAGGGCTGCCAGCTGCTCGTGTACGGCTCGGAGCTGTACCCGGGGGCGAGACCA  
GAGGTGGAGTGTCAACTGGACAACACACTTCACTTATATGGCTAGATCATGAAGGAATACTGTGATATTTATTTAAC  
CTTTATTTAACTAGGCAAGTCAGTTAACCTGTTAGGGCTAGGGGGCAGTATTGACACGGCTGGATAAAAAAACATACCC  
GATTTAATCTGGTTACCACCTCCTACCCAGTAACTAGAAATATGCATATACTTATTACATATGGATAGAAAACACCCTAAAT  
TTTTTAAACTGTTTGAATGGTGTCTGTGAGTATAACAGAATCATTTGGCAGGCAAAACCTGAGACATTTTCTGACAG  
GAAGTGGATACCTGATGTGTTGTATTACCTTTAAACCTATCCCATTGAAAAACACAGGGGCTGAGGAATATTTTGGCAGT  
TCTTATTGCTTCCACTAGATGTCACCAGCCTTTACAAGTGTGTTTGGAGTCTTCTGGAGGGAGATCTGACCGAACAAGAGC  
CATGGAACGATGATGGCCATTAGACACCTGGCGCGCAGTTCATGTTGGGTACCCCTCGTTCCAATACGTTATTAAGAG  
TATGCATTCGTCCACCTTGAATATTTATTCATGTTCTGGTTAAAAAAGGCCCTAATGATTTATGCTATACAACGTTTGACA  
TGTTTGAACGAACGTAATAATATTTTTTCCCTCGTTCATGACGAGAAGTCCGGCTGGCTTAGATCATGTGCTAACAAGA  
CGGAGATTTTGGACATAAATGATGAGCTTTTTTGAACAAAACACTACATTCGTTATGGACCTGTGATACCTGGAAGTGACA  
TCTGATGAAGAGCAATCAAAGGTAATGGATTATTTACATAGTATTTTCGATTTTAGATCTCCCCAACATGACGTCTAGTCT  
GTATTGCAACGCGTATTTTTCTGGGCGCAGTGTCTCAGATTTAGCAAGTGTGATTTCCAGTAAGTTATTTTTAAATC  
TGGCAAGTTGATTGCGTTCAAGAGATGTAATAATATAAATCTTTAAATGACAATAATAATATTTTACCAATGTTTTCTAAT  
TTTTAATATTTAATTTGTGACGCTGACTTGACTGCCGTTATTGGAGGGAAACGATTTCTCAACATCAATGCCATAGTA  
AAACGCTGTTTTTGGATATAAATATGAACTTGTAGAACTAAAAATGCATGCATTGTCTAACATAATGTCTAGGAGTGT  
CATCTGATGGAGATTGTAAGGTTAGTGCATATTTTAGCTGGTTTTATGGTTTTGGTGACCCTGTCTTTGAATTGACA  
AAACATTACACAACTCTTGTAAATGACTGTCTTAACATACTCTAAATTTATGCTTTCGCCGTAACCTTTTTGAAA  
TCGTAAAACGTGGTTAGATTAAAGGAGATGTTATCTTTCAAAGGTTGTAATAAGTTGATGTTTTGAAAAATTTGAATTT  
TGACATTTATTTGGATTTCAAATTTGCCGCTCTTGAATGCACCTGTGTTGATGGAGTGCACACGGGTGCGCAGCTAGC  
GTCCACCTAGCCCATAGAGGTTAAGAACAATTTCTTATTTACAATGACGGCTACCATAGAGTGTAAACAGTGAGAAAAAT  
ACAGCAAATAGCAGGCTTGTGAAAATACATGTTTGAACACAGAGACTTGTATACCAATGAGTGAAAGTATGCATAC  
TAGCATGGATTTGTCTGAATATTAGAAAACCTGTGTTGGAGAGAAATCTAAAACCTTGTATGCAGTCTGTGCTTGTGAT  
GTGTAGATAAAAGCTGGCCTGTGTAAGGTATGTGGTGCAGTGTGTTCCGGTGTGTGTTGGTGCAGTGTGTTCCGGTGAACGGG  
GGGGTTGAGTCTACCTGTGTACACACCTGGTCTGTAACCTCGGCCAGGCGGTGTGCTCGCTCCTCCTCGCTGCTCCGAGC  
TGCTCTCGCTCTGCTGCTGGCTCGTCTCCGACGAGGAGGAGGACGATGACGACGAGGAAGAGCAGGAGGAGTCTG  
CCGCCCGGTGAGCGTGAAGTCCCCATGCCCGCCCATGCCACGGGACTTGGGAGGAGCCTGTGAAGGGGCTCGTCCGG  
CATCTTGGCGAAGCGAACTCAAACACGTCCTGGATGGACAGATGGACAAAACGGAGTGAAGTGTGTTTTTTACTTCA  
TTGTGGATCATGTCCCTTTTGTGTTTGTACACAATAATAACAGTTATACAAGAAATAAAGTTGTAGGGACAGAACAGAG  
AAATGGAGACCAAAACAATTTATAGATTAGTCATTAAGTAGACTTATCCAGTGACTTGCAGTCATTGCCTTCTGCCAAGG  
TAGACTACCACATATCGCAGTCATTGCAAGTAAAAACCCCTGAGCATGCAGTGGACAGAGGTCAAGCAACAAGGTGAAC  
TAAGGTTCCAGGGTGAATTTGTGGTACAGAACCGAGCTCACCTGCAGCTTGCGGGCCATGCCACTACGTCATGGTCCG



CCACACCCTGCAAGAAGAACATCCTGTTCCCTTTAGCTTCAGACGGCTAGTCTAGCTAGTTAGATAAAAAACAACAGATTTT  
 TTGTTTATATAATCGTCATCATCTTTACGTTTACGAAACCGAATGGTTATTAAGAGCTACTCTGAATTAATAATACAAAA  
 CAATTATTAACCGGTGGTAGGCTTCCCTCATGTCATGACTGGGTACTATTTTCTAATGGTTAGCCCCAAGTAGCTAACCGT  
 AGCTAGCTAAAATAGCCAGAAAATCACCAGCCTTTTAGGCACACTGGCACCTAATGTATTTGTCCTCCACCTTTCATTCT  
 CCTTCCGTTCCGCTTTTGGGGTTACTATGGGCAGTTTTACTTGTGGGTATATCAGCTGTATCCAATGATTTATATATAC  
 ACACACACATCATTGGCTGTATCAGCCTCAGTTATAGGTTTTATTTCAGTCACTTGGTTGGAGCATAACTCCGTTTTTTTT  
 ATTTGAAGTGAAGTTATGCAATCTGTCACATCAGTGGGAGTTTGGGGCAGTTCAGCCGTAACATGATGATGCCGACATT  
 TAAATAAATTGTTGTCAACATCTTGTGTCATGACATGGCAAATTTTTTCAGACAGCTTGATTTTCTCAATTTGTTTCACATCA  
 TTA AAAAGGGATAGGCACTAGGCCACTTGATGGGTCAATTTATGACAAAACCTTTTCGATATTTGCCAGTCATTTCAATGA  
 CTGTTTCACTAGTAAAGTGGAAAACTCAGAAGTGAATTAATAATTTGATCAGTGAACCATCATATTTTGAATAAAAT  
 ATATAAGAATGAAAGAGAAGGATGGCTGTTTTGAATTTGGTCAAGTTAGTGTGGGAGAGGTGGGAAAACTATTGTTATCC  
 ATCAATAATGATGTGGGGCGGCAGGTAGCCTTGTGGTTAGAGCGTTGGACTAGTAACCGAAAAGTTGCAAGATTGAATCC  
 CTGAGCTGACAAGGTA AAAATCTGTTGTTCTGCCCTGAACAAGGCATGTAACCTGCTGTAGTAGGCTGTCATTGAAAA  
 TAAGAATTTGTTCTTAACTGACTTGCCCTAGTAAAATAATAATGATAAGTCAACTGGTAAAGAAAACCTTGATGGGAACT  
 ATTTGAGAATGGTAGCAGAATGATTTGCCACCCCTATTTGCTATATCTTTTGCCAAAGCCTAAAGTAGTGTGCAACAGGT  
 GTAGAAGGAAGCTAAAGTAATCCACTGCCTAATAATAGTAAAGCACCTTTGTTGGCTCAACAGCCACCACCACAGT  
 TTTGCTGCCTGCTTAGTACTGATTGAGAGAATTTGTTGTTGACCTAATACTACTATGCTATTTTTCAGAGAACAAGTTAA  
 CTACTGACTTTTTCAGATGATATAGAGAAGGAACTCAACTTGTACTGCACATGCTCAGATGACAGATGATTTCTTAAAA  
 TAAATGGATAATAAGATGATAGTTGGAGCTGTATTGTTAGATTTTCAGTGCAGCCTTTGATGTTATTGATCATAAATAGTT  
 ATTTGAAGAACTAATTTGCTTTGGCTTTAAATCACCTGCCAGCACATGGTTGGAGAGTTATTTATTCAATAGAACCAGAG  
 GAGTATTCTTCAATGGAAGCTTCTCTAGCATCAGATATGCACAGTACCGTGTACCTTAGGGCAGTTGCCTTGGGCCGTTA  
 CTCTTCTCTATTTAAAAAATATTTTGCCACTGGTCTTCCACATGATGTCTGTTATAAAAACGATGTTCTGTGTTTTTGA  
 CAAAAAATCAACTGACTAGTTGTTTCAGACTCTGGCTAGTCTTATCTGATTAGTGTTCGGTAATATGGTCAAGTGCA  
 CGAAGCCACAGCTGGCTCAAAAACAGCAGCAGCAGCAATCCAGATTTGCTGCAATTAACAATAACATTCAGCTCAGAC  
 ACCATACATACCTCACAACATTTACATTTAAGTCAATTTAGCAGACGCTCTTATCCAGAGCGACTTACA AATTTGGTGCAT  
 TCACCTTATGATATCCAGTGAACAACCACCTTTAGAATAGTGCATCTAAATCTTTTAAAGGGGGGGGGGGTTAGAAGGA  
 TTACTTTATCCTATCCTAGGTATTCCTTAAAGAGGTGGGGTTTCAGGTGCTCCGGAAGGTGGTGAATTGACTCCGCTGTC  
 CTGGCGTCTGAGGGAGCTTGTTCACCATTGGGGTCCAGAGCAGCGAACAGTTTTGACTGGGCTGAGCGGGAACCTGTG  
 CTCTCCAGAGGTAGGGGGCCAGCGCCAGGCTGGATGGAACGAGTGCCTTGTTTGGGTGAGGGCTGATCAGAG  
 CCTGAAGTATGGAGGTGCCGCTTCCCTTCACAGCTCCGTAGGCAATCACCATGGTCTGTAGCGGATCGGAGCTTCACT  
 GGAAGCCAGTGGAGAGGAGCAAGGAGCGGGGTGACAAGACATGCCACCAACATGACACCAAATTCACGCAATGCACAGT  
 GTTATACAGAGCCAGTATTGCATGGAACCTCCCATTCCTCAATTAAGTCAAGTCAACAGCAAAATGACCTTTAACCTTCAT  
 GGTTTTGTATTACCCAATGTTTGCAGGTCTGATGGACCACAACATTAATGGGTTTTTAAACAATACAGCCATAATA  
 ATTTGCGTAAAAATACCTTAATACTTAGATGTTGACATTTCAATTACAACAATATAGACAGCATAACATGGTTAATATTTG  
 CCATTTACCTCTGCTAGATCACATTTATCAATAAAAAGCACTATTTGTTTTTAAAAATATATAATCCAGACATGGGTGGAAT  
 AAATCATGTTTATCTTGAACAATAATAAATGAAACAAGGTTTTTCATCACTATTGATGTTTATTGCTTTGAATGAACAAA  
 TTTGGAAGCAAAATTTTACATACAGTAAAGCCGGTCTCACACACATGAGGACAGAGTTTTACTGTTTTGTGTTGCA  
 AATGTATTTCTTGCCTTGTATGCATGTGACTGTGTCTTCTGCTCTTCTTGGGTCCACACACATCACAGCGCTTCTTGT  
 TGCTACCGGCTGCAATCTAGAATGAGGAAAACACTTAGTTTCCAGGAATTTTACTAACATCTCACTCACTCACTCACATATA  
 TAGTTACAGCAGGCCAGGTAGGAGAGTTCAGACACACACATGCAACAACATCACTCACTTACTTCCAGTATTGGAG  
 ATGTTGGTCTGTGGGTTTTGGCGGATGGGGCACCAGCATCCTCCTAAATCCTCCTCATGATGGCTGCAGAAGCTGGGGT  
 CTTGGGATATGTTGCCCTAGATTTGAGGTCTTACCAATGCCTTGCCAGCACCTTGAGAAAAGAGCTGTCTCTCTGGAG  
 CTCCCTCTGTTCCAATCTGGGTTCAACGCCATCCAGATGACAAAACGTGTTGTACGCCAAGATGTTGAAGAATATCACA  
 AGTGCCAGCGTGGGTTCTTATTTTTCAGTGTGAGCCAGTCTTCAATATTTTGGGGTTTAGACAGTATGCTGTCTGAAGG  
 CATAAGCTGCTCATCAACAGTAACGTTGGGCCAGGGTTGTAAAACAGGGAAAGGTGGTCCACCAATACAATAATGTAT  
 TGTAATAACATTGTGAAGGCACACAGCAAACTTGTTTTCAATTTTACTTGTTTTACCACACAGCTTTTCCACACTTATC  
 CTCTGGTCCAGTGGACCTGAACACCACACAATGTAATAAATGTGTAGAGGGGTGCACAGTGTACACTCAATGAAAATG  
 TGTATTTTACATGTTTATCACAGAAAATGAGCCAAGGCCATTGAGTCTCAGGTAGAAAAATAATGAATGTATAATTT  
 ATTTTAGTAAACATTGAAAATGGGTTCACACAGACCCAAAACACCACACAAGGGTTAAAAAATAGATTAACAACATGGCAT  
 GGATCAGCGGGGACTTTAAGGGGACAAGCACATGCAGACAAAACATTAATTTGTTTTACTTGAAGTGAAGGAAAGCATCTTC  
 ACTCATGCTGCCAAACATAACCTCATAAAAACACTGACTATGCTACCGATCTTGACTTCGGCGATGTCAATTTACAAAATAGC  
 CTCCAACACTTTACTCAGCAAAATGGATGCAGTCTATCACAGTGCCATCCGTTTTGTCAACAAAGCCCAATATACTACCC  
 ACCACTGCGACCTGTATGCTCTCGTTGGCTGGCCCTCGCTTCATATTTGTCGCCAAACCCACTGGCTCCAGGTCACTAT  
 AAGTCTTTGCTAGGTAATCCCGCCTTATCTCAGTCACTGGTACCATAGCAGCACCACCCTGATGCGCTCCAG  
 ATGGTATATTTCACTGGTCAACCCCAAGCCAATTCCTCCTTTGGCCGCTTTCTTCCAGTTCTCTGTGCTGCAATGACT  
 GGAACGAATGCAAAAATCACTGAAGCTGAGACTCATATCCCTCACTAATTTAAGCATCAGTGTTCAGAGCAGCTCACA  
 GAGCATTGACCTGTACATAGTCCATCTGTAATAGCCCAACCTACCTCATCCCAATGTTATTTATTTTTTTGATCC  
 TTTGCAACCCAGTATCTTACTTGCACATTCATCTTGCACATCTATCACTCCAATGTTTAAATGCTAAATGTAATTA  
 CTTCGCCACTACAGTCTATTTTTTGCCTTACCTACCTAATCTTACCTCATTTGCCACACTGTATATAGATTTTGTCTA  
 TTGTGTTATTGACTGTACGTTTGTTTATTCATGTGTAACCTCTGGTGTTTGTGTGCGACTGCTTTGCTTATCTTGGCCA  
 GGTCCGAGTTGTAATGAGAAGTGTCTCAACTGGCTACCTGGTTAAATAAAGGTGAAAAAATGTAATAATAATAAT  
 GGCCTTTAATGTTTACATATCTGGCATTACTCCTCCTCATATGTATATACCGTACTTTATACCATCTATTGCATCTTGCC  
 TATGCTGCTCTGTCAATGCTCATCCATATATTTATATGTATATATTTTATTCCATTCCTTACTTAGATTTGTGTGTAT



TAGGTAGTGTGTTGTTGGAATTGTTAGATTACATGTTAGTTATTGCTGCACTGTCGGAAC TAGAAGCACAAGCATTTCGCGA  
CACTCGCAATAACATCTGCTAACCATGTGTATGTGATTTTTCCCATGACTGGACTTCCTCTCATTAAACATATTTTCATGGT  
GAGAAAAACGGTCTAAACAGATGCTTCAGCTTTATAGCCCTGTGACGCTGTGTGGGTTACCCCTTGTCTGTGCTGCTACTG  
CAGTATCTGGCTGCTCAGACAGTGTACGTTTGTGGACCTAAAACATACTATTGAAATTTGTTATGAAATGCCTGTGT  
TAAGCATCGTATTGCCTTCATTGGAAATACCCTCTAAACACTAACAGTATTGCTGGTGGTCAATGTATGCGATTTCGGCTT  
GGCTTTAGCATCATTATCTAGGCCGTAGTAAAGGAAAGAATAAGTAAAAGCATGACATAGGCGTTTTCCACAATAAT  
ACAGATCAACTGCAAAACGTACACATCATGTGTTATATGTAACCATTCCCCACATTCAGATACTAAATGAAGAAAT  
ATTTTAGAGAGCAGAAATGTTTATTGTCAATTAACACAGAACAGAAAAGGGCTCCTGTATTGTACTCCCTGAAAGACAATGT  
ACACAGAAAAACAAACATTTCTTTGGGATCCCTATTTATATATACTGCTCAAAAAAATAAAGGGAACACTTAAACAACACA  
TCCTAGATCTGAATGAAAGAAATACTTTATTAATACTTTTTCTTTACATAGTTGAATGTGCTGACAACAAAATCACA  
CAAAAATAATCAATGAAATCCAATTTATCAACCCATGGAGGTCGATTGGAGTCACACTCAAAATTAAGTGGAAAA  
CCACACTACAGGCTGATCCAACCTTTGATGTAATGTCCTTAAACAAGTCAAAATGAGGCTCAGTAGTGTGTGTGGCCTCC  
ACGTGCCTGTATGACCTCCCTACAACGCCCTGGGCATGCTCCTGATGAGGTGGCGGATGGTCTCCTGAGGGATCTCCTCCC  
AGCCTGGACTAAAGCATCCGCCAATCCTGGACAGTCTGTGGTGCACCTGGCGTTGGTGGATGGAGCGAGACATGATG  
TCCCAGATGTGCTCAATTGGATTCAGGTCGCTGGGGAACGGGCAAGCCAGTCCATAGCATCAATGCCTTCCTCTTGCCAGGAA  
CTGCTGACACACTCCAGCCACATGAGGTCTAGCATGCTTGCATTAGGAGGAACCCAGGGAACCCGACCAGGCATATG  
GTCTACAAGGGGTCTGAGCATCTCATCTCGGTACCTAATGGCAGTCAGGTACCTCTGGCAGCACATGAGGAGGCTGTG  
CGGCCCCCAAGAAATGCCACCCCAACCATGACTGACACACCCGCAACCCGATGCTGTGGAGGATGTTGCAGGCAGC  
AGAATGTTTCTCCACGGCTCTCCAGACTCTGTACGCTCTGTACGCTGCTGACTGTGAACCTGCTTTTCATCTGTAAGAGC  
ACAGGGGCCAGTGGCGAATTTGCCAATCTTGGTGTCTCTGGCAAATGCCAAACGTCTGCACGGTGTGGGCTGTAAG  
CACACCCCCACCTGTGGACGTGGGCGCTCATACCACCTCATGGAGTCTGTTTTCTGACCGTTTGAGCAGACACATGCA  
CATTGTTGGCTGTGTTGGAGTCAATTTGCAAGGCTCTGGCAGTGTCTCTCTGCTCCCTTGACAAAAGCGGAGGTGAC  
CGGTCTGCTGTGGTGGTGTGTGCTCCTACGGCTCCCTCCAGTCCTCTGATGTACTGGCTGTCTCTGGTAGCACC  
CCATGCTGTGACACTAGCTGACAGACACAGCAAACTCTTGCCACAGCTCGCATTGATGTGCCATCCCTGGATGAGCT  
GCACTACCTGAGCCACTTGTGTGGGTTGTAGACTCCATCTCATGCTACCACTAGAGTGAAAGCAGCCAGCATTCAAAA  
GTGACCAAAACATCAGCCAGGAAGCATAGGAAGTGGTCTGTGGTCCCACTGCAGAACCCTCCTTTATTGG  
GGGTGCTTGTCTAATGTCTATAATTTCCACCTGTTGCTATTCCATTGCACAACAGCATGTGAAATGTATTGTCAATC  
AGTGTGCTTCTTAAAGTGGACAGTTGATTGACAGAAATGTGATGACTTGGAGTTACATTGTGTTGTTAAGTGTTC  
CTTTATTTTTTGGAGCAGTGTAGTTAGAACAACAATGTGGGAGAACAAATTAACAATAAATGTAAAAATAAATACAA  
AATGCTTTTGGGCAATAAGAATACTTAAGTTACACTATAGTGCAAATAGAAAGTTGAACAAGCACATATACATGACCA  
TCTGAAGTTTGGCAATGAACATCTGAATGATTTAGAGTACAACTGGGTTGAAAGTGTGGTGGTGGTGGTGGTGGTGGTGG  
AGCTCTTTAGCATCAACTCAACTCACCGTGTGGGAGGAGGGAATGCTGCCTATGACCCCAAGAACCACATCCCCACC  
GTCAAACATGGAGGTGAAACATTTATGCTTTGGGGTGTTTTCTGCTAAGAGGACAGGACAACCTTCACCGCATCAAAGG  
GACGATGGACGGGGCCATGTACCGTCAAACTTTGGGTGAGAACATCTTCCCTCAGCCAGGGCATGAAATGGGTGCTA  
GATGGGTATTCCAGCATGACAATGACCCAAAACACAGGCCAAGGCAACAAAGGAGTGGCTCAAGAAGAAGCACATTAAG  
GTCTGGATGGCTAGCCAGTCTCCAGACCTTAATCCCATGAAAATCTGTGGAGGGAGCTGAAGGTTGATGTTGCCAAA  
CGTACGCCCTGAACCTAATGACTTGGAGAAAGCTGCAAAAGAGGAGTGTGACAAAATCCCTCCTGAGATGTGTGCAAAA  
CCTGGTGGCCAACTACAAGAAACGTCTGACCTCTGTGATTCCCAACAAAGGTTTGGCCACCAAGTACTAAGTCATGTTTT  
GCAGAGGGGTCAAATACTTATTTCCCTCATTAAAATGCAAATTAATTTATAACATTTTGGAGTGTGTTTTCTGGATTTTT  
TTGTTGTTATTCTGTCTCTCACTGTTCAAATAAACCTACCATTAAAAATATAGACTAATATTTCTTGTGTCAGTGGGCAA  
ACGTACAAAATCAGCAGGGGATCAAAAACCTTTTTCCCTCACTGTACTCTCCTTTTCACGTCACTTTGGACATACAGTA  
TGTGTTTATCAGTTAGTATAATCAATTAGTAAGCCAGCAACTGTATAAAAAATATATTTAAGAAAGGTGAAGTACAGGTA  
ACTGCCAAAATAAGAAATCACTTGAGTAAATGAGGATACATAATAATTTAAAGCAGGTGCTTCCACCCAGGTGCTGTG  
TCCTGAGTTAAATGAACAATGAACATCCCATCATGCTTAGGGTCATGTAATAAATATGTCAGTGGCCCATTTTGGCT  
ACCATGGCTAGAAGAGATCTCAGTGACTTTGAAAGAGGGGCTCAAAGCAGTATAGGGGGTAAATGGTGTGTGTGCT  
CAGTACCAGATCTCAACCAATGAACAATTTAGGGGATTCTGGAGCAGCACCTAAGACAGCATTTTCCACCACCATC  
AACAAAACAAGAAATATTCAATTTCTCGTAAAAGAAAGTGGTGTCAATCCCTCCAATAAAGTTCAGACACTGTAGAATC  
TATGTATATCACATTAAGCTATTTCTGGCGGTAGTGGTGGCCAAAGCCCTATTAAGACACTTTATGTTGGTATTTAA  
TTTATTTAGGCAGTTACCTGTAGATTGCAATGAGATGTGACTCACCTGTCTGAGCTTTGTCAAAGAAAGGGATCTCCTGC  
TTCAGCACCAGCTGGAAGACTAGGCCAGGATGGAGTGGGATGGGATGGGATGGGATGGGATGGGATGGGATGGGATGGGAT  
ACACACAGCACTGAAATGATAGAGATGGGAGAAGGAGAACAATAAACACGTTACTACAGTTTCATTACATAAATGCCCTA  
TGAAAGTGATTAGGACACTTGACCTCAAAAATAAACAGGAGTATCAAACGTGAGCATCAATGGAAAGGACTCAAAAGTATC  
ATATCCCAATTTAGATATATGCTGTACTATACCTCATGACTGTAATCAGAGACATGACCGTGAAGGCTTCAGGCTTGT  
CTTCAATTCATAATCAAGTCAATCCTGGCCCGGTGAGTGGGGAATAGCCATCTTACCAAGGGAAGAGATGACAAGACTC  
AGCATGGCTCCAAAGTGTATGATATAAGGCTTCATGATATCCATCAGTTTCTCTAGAGAGGGCCCGAGTCTTCTGTGG  
TTCTTGGTGGGCTGGTAAGAAGAGAAGAGACGTAGCGTGTCCAGTACAACCATGCTACGACTACGCAGTAGCCCTGA  
AGTAGCTGAAAAACAAGTGAATTTAGTCTGTGTTGGTTTATCAATTTTTTAAAAACAAAAGGGTATATATAAATACACAC  
ACACACACACACACACACATAGCAATATAAACTTGTCAACCCACCCTGCCAGGAGTGGCCTCCCATAGCTGCCCA  
GGATGGACTGGCCACATGCCAGAGAAGGCTGTAGTATGGGAGTAAAAGCAGAGGACACCCATGCTCTGGAGCCCC  
TCGAAGCTGCTCATCCATAGGGGACTTCCAGGGAACGTTAAAGGTGAGAAAGAGGTGGAGGCCGGCATGGAGCAGGCTTCC  
ACCCCAAGGTGATGAGGGGATGGGGGATGNNNNNNNNNNNNNNNNNNNNNNNNNNNNNNNNNNNNNNNNNNNNNNNNNNNN  
NNNNNNNNNNNNNNNNNNNNNNNNNNNNNNNNNNNNNNNNNNNNNNNNNNNNNNNNNNNNNNNNNNNNNNNNNNNNNN  
NNNNNNNNNNNNNNNNNNNNNNNNNNNNNNNNNNNNNNNNNNNNNNNNNNNNNNNNNNNNNNNNNNNNNNNNNNNNNN  
NNNNNNNNNNNNNNNNNNNNNNNNNNNNNNNNNNNNNNNNNNNNNNNNNNNNNNNNNNNNNNNNNNNNNNNNNNNNNN  
NNNNNNNNNNNNNNNNNNNNNNNNNNNNNNNNNNNNNNNNNNNNNNNNNNNNNNNNNNNNNNNNNNNNNNNNNNNNNN  
NNNNNNNNNNNNNNNNNNNNNNNNNNNNNNNNNNNNNNNNNNNNNNNNNNNNNNNNNNNNNNNNNNNNNNNNNNNNNN  
NNNNNNNNNNNNNNNNNNNNNNNNNNNNNNNNNNNNNNNNNNNNNNNNNNNNNNNNNNNNNNNNNNNNNNNNNNNNNN  
NNNNNNNNNNNNNNNNNNNNNNNNNNNNNNNNNNNNNNNNNNNNNNNNNNNNNNNNNNNNNNNNNNNNNNNNNNNNNN  
NNNNNNNNNNNNNNNNNNNNNNNNNNNNNNNNNNNNNNNNNNNNNNNNNNNNNNNNNNNNNNNNNNNNNNNNNNNNNN



TGAGTAACCAGTGTAACTGACCCCATCTCTCTGGTCCCTCCCATGTCGCGTCCCCTTTTGTGTCCCTTCTCTTCTCT
CTGTTCTGGTAAAACCTCCATGGCTCCCCTCTCCCTTCCATTCTCTCTACAGCACCCCTGTGCTCCCTCTCAAA
CCGATACAGAAGTAAATGTGCCCTAGTGCCCAGGCGGATGTACCATATTAGCCTTCCCTGCTCTTCTCTCTCT
CTCAGTCTCTCTCTCTCTCTCTCTCTCTCTCTCTCTCTCACACACCATCTCGGGTGATTCCTTCCCTCACCA
TCATTTGCATTTCTCATTTTCTCCCTTTCAAATCTCCCTTCCCGTCTTTCACCCCTTTGGGCTTGACTCTGTTGTATA
ATGTTTTGTTCAGTGGTCACTTACTCCCTCTCTTCTGTACTGAACTCCCACCTTCCCTCCCTCACCTTCTCCACTTGA
AATGACTCTCTCTCCAGGGGATCAGCCCTCCACTGGGCATGCTCAGTTAACCCCTCTCCTTGACAAGAACCCTCAC
TCGCTACGGTGCTGCGGTGGACCTACAGGACAACAAGGTACCAAGGCCAGCAGAAGCCTCTGCTTTTATGATTCTTACG
TACTAGTATGAAGATTTAGGAAGAGAAATTCGAAGAACTATATTTCTGTGTAGAATTGTTAACTTTAAGGTACTCCCT
ATTATGCTTCGCACTCCCATTCTCTGATATATACCATCCCATTATCTGATAGGGTGAGACTGCTCTGTTCCCTCCG
CCCTCCACGGTTGCTACGACACCGCCCGGTTCCGTCTCTGAACGGTGCCAATCAGGATCTGTCTGATCCGACAGGACGC
CGGCACTGGATGTTGCCGAGAGGGCATAACATCAAGTCCCTGGAGCTCCTATTGGCTCACAGGGTTACAGAGGGCC
TATTCCTATGGAGCAAGCCAATGATATGCTGTGGGATGAGCGTGCCCTGCTGTATAGCCAATGGGTGAATTCCCCTGGG
TCCCCTGGGAGAAGTGCTCTCTTCTGTGTGTATAGGGCATCGGGATATGTTCTCCCTCCACCAAGGTAAAGTCTTGTTG
GCATTTGGCACATCTACTCAATAACATTTAACAATTTACTAATCTTGATAAGGCAAAATTCATCAGCTACTCATAT
GATCGCCCTCTTCTTTGACAGTGATTGGTCAATGGGCAGAGTGCAGTGCCTTCCCCTCAGAACTGGCGGCCACAGCTC
AACCAATCAGTGACCGCATTTGGTCCACCAAGATCATGGGGCTCCCCACGGCCAATCAGACTCTGCAGGAAGTTAC
CTCAGAGGACGAAGATCGTGAAAGGCCAGGAAGTCCGAGAGCAGGACACCGCACTTCTGTTACCAGCCTGCTC
CTCGACAGCGGTCTTCTCTGTACCCAGAATGCACTGCAGCGTCCGCTCCAGTTCACAGCAGCCCAGCAACTTATGTT
GCCTTATCGGAGAAAATTTGCCAATGAGCCCATAGAAAAGTGTAGTGTGCTCTTCCCTTACAGATGCTCCCAACCAATCAA
TCGTAGATCAATAGTCAATAGTAGCGATAACCCCAAGGCGGCCACAGAGATTGAGACAGCAAGTTTAAAAGGCGAG
ACCAAAAAGCCCAGTGAAGAAGCTAAAATAACCACATGCCTGACTTAAACAAAACAGCTTTGTAAGGGAGAGGGCTCTGC
TAAAATTAACCCAAATACCAATGTCAATCAGTGTGTTTACATTTTCTGTAAACAGGCTCCCTGCCCTAAAATACCCGAG
ATTGACAGACGGGATATAAACTCAGTCAATAAAATGAGTCACTTAAATTTACTCTAAATATCTAAATCAATAAACTATGAAA
TAATTCATGTGCAATTGTTTTCTTCTGCCATATTAGGCACTGACCTGTCTCTGCTGATATCAACCAATCAAGACAGACCA
ACTGACTGTGAATACAGAGTCTTTATTTGTAAGAAGGTTAGAGAGAATACAGGTGTTTTTCACTACTGTACAGAATGACA
GCCTGTTGATATACTCATTCAAACGGTAAATATAACCAGCACACACTTCATTTCATGATATAGACACACAGACAAAACA
AGCCAGTAGAAAAGAGAAAACACACACATTAATCTTTGGATTTTCTCTATTGCCCCATATCCTCTAAATGCAACTAT
ATCTGAGCTTTAAACGAAAATCTAAAATATTTGTAATAACAGCATTAAATAATATAGCCTAAATAAAACAATGGTAATGCA
ATTTCCCAAGCCTCCCTCCCTACATACTACAGTAACTATAAAGTATGTGAAAACAAAACCCCATGATCCCAATACAAA
CATCACACACACTGACACAAAAATCACACATTCAGTCTACATAAACATAAATGAACAGTATCATTGGACAGTAAGA AAC
AGAAAAAGACATAAAAAACTGCAGCCAAGTAAGAGTATATCTTTTCTGCTTTTCCGGTGTCAATCTTTCCATCTA
GGTCATTGACCCAAAGGGGGCGGGCCATCAGTCAGAGTCCCCGAGTGGTCCGTTTCCCGGGGAAAGTGGCAGAGGGGGG
GTGTTTTGCCCTTGCAGTTCACATAGTCTGCAAAAACAGAAAAGACATGGTGACTTGTAGTGGCATTAACTTACATTA
ACCGTCTCCAACCAACTCCTCCCAAGATTGTTGTTGTGAATGAGAATGTGCTCTCAATAGCTACGAGCTAAAATAA
AGATGATATGTAACAATGAAGTGAATGACAGTGAAGTCCACTACTTGTGCTCCCATGTAGACAGGCTGCTCTCCATTATT
GGTGGAACACGAGAAAAGGTTGTCAGTGAAGTGAAGACCCCGACCTGTGGAGGAACAAAATGGGAGATGTCTTT
TTAATAAGGGCTACGAGGCCTACAACACCAGTCTGGTCCCAGATCTGATCTGTGGAGGAACAAAATGGGAGATGTCTTT
AATAAAGGCTACTAGGCTACAACATCAGCCTGGTCCCAGATCTGATTTGTGCTATAAAGCCGACTTCTATTGTTGGTCAA
GGAGTTGGCAGCACAGCAGCAAAAAGCCAATTCAGAAATTAGGAAATTACGACAGGCTTTTCTTACGAAATTACGCAGGCC
TCTTACGCACTTCTCAGTAGTTGGTGTTCAGACGCATCTTATTAGTTCGTAACGGGCTTTGACAGACATAGTTCCCTTG
TGTGCTGATTAAGTGAATTTCACTGCTGAAAACCCCTCCACTTGTGGTCAATAGATTTTCTCGTGGAGTTTTACAGCA
ATTTATTTAAGCCATCCCTTTAAAATGTTGATACATTTAAGTTAGAATTTGTTGACAGACTCGACAGAATATATACGA
GAGAAGGGGTTGAGAAATAGGGATCAATCAAAGAAAGTCACTATAAATATGCAATTCGCTCCGTTTCAGAACCAA
TTGGTAGAATTAATAAATAGAAAAGCTGATAGACTGCAGATTATTTAGGGTTAGGAAAGTATTTATGAAAAACAGTGTGGGA
GAGCCTTTACACACGAAAAGAAAACGGTGTGTGATTCTGAAAATCACCAAATTCAGTTTTTAACCAATGGTTATGT
TGGAGATCAGCGTACGCAGAATTATAATAGGGAGAATAGTGTACAAATAGTAGACTATATCCTCCTCTATTCTGCAAT
AACCATGAACTGTGTGATGACACAGCCAAGTATTCGCCATGCGTTGGGTTCAAACGTGTACGGCATGAGCTGCGCTAC
GTTCCAGTACGATTTAATTAATTAATGATGATGATGCTTTGTAGAGGTAAGTTTGGGGATGGGGGTCAAGAGACC
AGAGGTGGCAGAGCAGGTGGAGTGAAGTTGGAGCATAGTCTGAAGTACGGAGGGCAGTTCCCTTGTCTGCTCCGT
AACCAAAAAACACTAACCAACCCATCCATTTCTATTACCAATTTGAACCAAAAACCTCAAACAGTGGCGTGTATCACTAGGC
CTGGCTTCTTTCCCTCAACTCTTACCTGTGAGTTGGGCGTGTGTGATGAGTCCCTGTTCTGTGTCGCCACGATGGCCGT
CTTCATGGCATAGATGTTGGCCTCCTTTGGAACCTCCCGATGTTCTTCTTGTAGCGGATCTCTTGTGTTGCCAAACCAGT
TGCAACCTGTTTCACTAAGGAGCCAGGAAAGGGTGGTCAATGGAGTCAACTGTATATGGACGATCAATGGGTGAGCT
AATAGTAAGTATATGACGCAAGGTTACCTGAGAGACAGTGTGCTACTGTTGGCTAGCTCTTCTTTGGCCTCTTTC
TGGGTAAGGTTGGGAGATGGGAGTGAATAACTCGTTACAGACTCCGTCGCCCTGCTGCTGAAGTACGTTCTCTTA
CGCTGACAACCAAAAGGTGAGGGTGTGAGAGTGGCATAACACCCAGCAGAAAGTGTACATTTCAAACTACAGTTAT
AACACACAATAGTCAATTCACAACCTGCACTGTAATAACATGACTTTGCATTTGGTATGTGACTGGTATGACCATGAACCAC
TCTTAATTTATGGAAATGATTTATTTCTCATATAAAAAACTACCTGTACATGAATTGCATTACGATCATGGCAAGTTT
TGACAGGTGTTGTGTACCACAATAACAGTGTACACGCTGACTGGCGTGCAGGAAGCGGGACCTCAGGATCATGACGG
CCTCGCAGGTGCTCTGCTTGGTGTGCTGAGTGGAGCTGAACTTGCAGTGGATGATGGCCACCATGCGTTCGATCTCC
CGCGGTGACACAGGGTCTGTACCGGACTGCTCCCTCAGCAGGTTTCACAGTGGTGTAGTGAACCTACATACCTACAG
GAGACACGGAGAGAGGGGGAATTGGAGACAGATATGACAGTCACTGGGCTCAAAGGATGGAAGTCAACACTGACCC
CAGCACACANNNNNNNNNNNNNNNNNNNNNNNNNNNNNNNNNNNNNNNNNNNNNNNNNNNNNNNNNNNNNNNNNNNN
NNNNNNNNNNNNNNNNNNNNNNNNNNNNNNNNNNNNNNNNNNNNNNNNNNNNNNNNNNNNNNNNNNNNNNNNNNNN
NNNNNNNNNNNNNNNNNNNNNNNNNNNNNNNNNNNNNNNNNNNNNNNNNNNNNNNNNNNNNNNNNNNNNNNNNNNN
NNNNNNNAAGTACCTGGTCAATTTCCATCTCAGTGTGATAGATGTTGCGAATCTGGCTCAACTTGCTTTTGTAGTCTG
AGTGTTCAGTGTGCTGGCGACATCCCTCCAGAGCTGGTGGCTGCGGACACCGCCGCTGCCGCCCGCCACCTTTC
TCCGGCCAGCCACACCCCTCCGCCAGCAGCATGTTGCCAATCGCACCAGCTGTGGGCTCTGTGATTTCTTCTCTGAGC

Text S2 Atlantic salmon MHC class II sequences, transcripts and genomic regions

ATTTTCGCATTGATAGGCTGCAACAAGAGAGGCTCTGTCATCTGATTTCATGGTAAATTAAGAGTTACAATGTCTCCTATT  
 AACTGAAACAAAAATATCAATGCAGCATGCAACAGTTTCAAAGATATTACTGAGTTACAGTTCATATAAGATAATTAGTC  
 AATTGAAATAAATTAATTAGGCCAACTCTATGGATTTCACTAGCTAGGAATACAGATAAGCATCTGTTGGTGCAGAGT  
 ACCTTTAAAAAAGTAGAGGCTTTGATCGGAAACTAGTCAGTACTGTTGGTGTGACCACCATTTGCCCTATGCAGCGC  
 CACACATCTTCTCACATTGAGTTGATCAGGCTATTTATTGTGGCCTCTGGAATGTTGTCCCACTCCTCTCAATGGCTGT  
 GCGAAGTTGCTGGATATGCTGGGAACTGGAAGACACTGTGTACATGTCGATCCAGAGCATCCAAACATGCTCAATGG  
 GTGACATTGTGCAGGCCATGGAAGAACTGGGACATTTTCAGCTTCCAGGAAGTGTGTACAGATCCTTGCATTATCATACT  
 AAAACGTGATGATGGCGGAGATGAAATGGCACGACAATTCATTGCATCAAATTTCCATAGATATAATATAAAACAATT  
 AAAAAATATAATTTGTTTGTCCGTAGCTTATGCCTGCCATTCCATAATCCCACCGCCACCATAGGACGCGCAGTT  
 CACAACGCTGACATCAGCAAACCATCGCCCCACAGACACACTTACACACTGTCTGCCATCTGCCCCGAACTGGGATTC  
 TCTGTGAAGAGCACACTTCTCCAGCGTCCATATCCATCGAAGGTGAGCATTTGCCCACTGAAGTTGATTACGCCGCTTA  
 ACTGCAGTCAGGTCAAGACCCTGGTGAGGACGACGAGCAGCAAATCAGCTTCCCTGAGACAGTTTTGACATTTTTGTTGGA  
 GAGATTATTCTGTTTTCCACAGTTTCATACCAGTCCGGTGGCTGTTCTCAGTCGATCCCGCAGGTGAAGAAGCCGGAT  
 GGTCTGCTTTGTGAGGCAAGTTGGATGTACAGCCAAATTCCTAAAACAACATTCGAGGTGGCTTATGGTAGCAACAGCT  
 CTGGTGGACATTTCTGCAGTCAGCATACCAATTTGCATGCTACCTAAAAAAGATATCTGTGGCATTGTGTTGTGTGACAT  
 AACTGCACATTTTAGAGTGGCCTTTTATTCTCCCCGCAAGGTGCACCTGTGTAATGATCATGCTGTTAATCAGCTT  
 CTTGATATGCCACACTGTCCAGGTGATTGATTGCTTGGCAAAGGAGAAATGCTCATTAAACAGGGATGTAACACATT  
 GTGCACAAAAAAGATGAAATTTTCAAGGATATTTTACCTCATGAAACCAACATTTACATGTTGCATTTTTCG  
 TTCAGTGATATTAATAATTCTCCCTCTGAGGTACAGACTTTGGAGAAGCACTATGTGGATGAAACAAATACTGGAAGGC  
 TCATCTTGGCGCAAAATTTGAAAAGTCATCATACACAATAACAATTTGTGAAAATTAATAATAGCTAGAGAATTTTCTA  
 ACTGTCATCTAAGTGGTGGATCATGCGCAACTCATTTATGATGGAGCCAACATCTGCTTTCGTACAGATGGCCAGA  
 AACTTTTAAACGAATTAGCAACAAGTTTAAATCAAACAAGGGTTTCAATTAGTGAAAAATAACTTACCTGTTTTCTCT  
 TTGATCTCGCATAGACGCTGAACAAGCTGGTTTTCATTCGATGGCAATTCATGCGTGTGTTTCTGACGATGAAAAAAA  
 AAGATCATTGTTATTAGCTAGCTAACCTAGCTACTGTAGCTGTATCTAGTTTTATCTAGCCAGCTATTAGCAACGAGCC  
 ATTAGCACCAACAATAATTTGTTAAGTTAGCTAGCTCCCTGCTTTCACACGCTTGTATATAGCTAGCTAACGTTAACGAG  
 ATGACATTCATAACAACAACATCCGGTGTGTTTCATGACCTTTTGGACGAGTTCACCTGCAGCCTGCTATGCTAGCGTTAG  
 CTACGCAATGGTATAGCTAGCTAGCTAGCAGCAGCTACAATATGTAGCTAATATGTTTACATTTTATTCGTAGAACAAATGTA  
 CATGAAATGGATAATGTCGAAGATTATGGCCACAGTCCTGTTATAATATATTGCTATTACATACTACTAACGGTTATATT  
 TGCTATGTAACCATTAGTACTAGTATTAGCAAACAATAAAGCAATAGAGCGTAGCTAACCTGGTAGTTTTTAGCTAGCAA  
 GAATTCACCCCTTACCTGCAGTTAGCCACAAAACATTTTCGTTTTAATAAATTTCAAATAACAACAGCGGTGTA  
 AGGCCAGGGGAAAGAGTGATAAACCATTTAATAAGGCCGTGCAAAATGGCTTTTATCATGAAACAAACCTAGTTAGCTTGCAG  
 CAACGTTGTCTACCTAGCTAGCTTATTAACAACTTCAAAGTTGAAGAAAAAAAAAAAACTTCTGAAACTTTAGCTAACT  
 CTTGGCCATTGAGCAACTTTGCAGTAAAGTGAGCTAAATCTGAATACGTTAGAAACAATATGACTAACTTTGCTTGTG  
 CTTCCGTCAAACCTTTGGTCCGGTGTGCTCATGATTTTGTGCAATATGTCACCAATGTCTCTGCGGCTTTTCATGTCCATTT  
 TCTGCGCCTTTCGTGGCCGTGTCTCCGTCGGAGCCGTTGGTGGGAAGATGGATGAACCGAGTTTAGAGGGTGCATACCGGG  
 GTGAGAGCTCAGGCCAAGGCCCCCGGCTTAGAGGGCCCGTTGCCAGTGAGAGGCTGCTGCTGCAACATCTCTGAGCGCCCA  
 CACAGTGGCGGCGGAGTAACTACAGTCATACACCTTCAAAGCTCAAACACTAGAGCAGGCCACGCTAGAGCTCCCT  
 AGCGATTGACAAAGAAAAAGTAAAGAACAAGATGTTTCATACAAATTCGAATTTGTACTCCAGACAGACCCCATAGGCTACT  
 GTACTAGGGATATTCATAGCTATGACTTTTTAAACTAAGTAAGTCTTCTGAACAATCAGGTAGATGGATATAAGTATAAGG  
 CACTGTGTGTGTTAGGCCATGTGTGTTAAGAGAGAAAGAGAAACAACAGTATTCGCAAGTAGCCTAATACATTGAA  
 CATTTGCATCAATGATGGGGGAGGATCATCTTCTGATTTTCATGTGAGTAAATTAATAATGATCAGCTTCATTTCTTAA  
 AATGTTTTATTTACCTTTATTTAACCAGGTAGGCTAGTTGAGAACAAAGTTCTCATTTGCAACTGCAACCTGGCCAAGAT  
 AAAGCGTAGCAATTCGACACATACAACAACACAGAGTTACACATGGAATAAACAACAACATACAGTCAATAATACAGTAGA  
 ACAAAGAAAAAAGGATCATAATACAGTGAAGTCACAAATAGGTAAGTAAAGGCAATAAATAGGCCATGGTGGCGAAGT  
 AATTAACAATATAGCAATTAACACTGGAATGGTAGATGTGCGAAGATGAATGTGCAACTAGAGATACTGGGGTGCAAAG  
 GAGCAGGATAAATAAATAAATAACAGTATGGGGATGAGGTAGATGGGCTGTTTACAGATGGGCTATGTACAGGTGAGTGA  
 TCTGTGAGCTGCTCTGACAGCTGGTGTGAAGCTAGTGAGGGAGATATGAGTCTCCAGCTTCCAGAGTTTGTGAATTC  
 GTTCCAGTCAATGGCAGCAGAGAACTGGAAGGAAGGCCGCAAAAGGAGGAATTTGGCTTTGGGGGTGACCAGTGAGATAT  
 ACCGTCTGGAGCGCATGCTACGAGTGGGTTGCTGCTATGGTACAGTGAGCTGCGATAAAGCGGGGCTTACCTAGCATGA  
 GACTTGTAGATAACCTGTAGCCAGTGGTGGCTGGCGAGGAGTATGAGCAGGAGGCCAACCAACAGAGAGCCTACAGGTCGCA  
 AAACAAAAACTGTTGATAGACTGCATCCAGTTTGTGTGAGTAGAGTTGGTGGCTATCGAGGATCCGGTAGGATGGTCAAGT  
 TTTACGAGGGTGTGTTTTGTCAGCATGAGTGAAGGATGCTTTGTGCGAAATAGGAAGCTGATTCTAGATTAAATTTGGA  
 TTGGAGATGCTTAAATGTGAGTCTGGAAGGAGAGTTTACAATCTAACCCAGACACCCAGGTATTTGTAGTTGTCACGATTT  
 CTAAGTCAGAGCCCTCCAGAGTAGTGTGCTGGACGGCGGAGCAGGTGCGGGCAGTGTGCATTGAATAGCATGCATTTA  
 GTTTTACCTGCGTTAAGAGCAGTTGGAGGCCACGGAAGGAGAGTTGTATGGCATTGAAGCTCGTCTGGAGGTTAGTTAA  
 CACAGTGTCACAAAGAGGGGCCAGAAGTATACAGAATGGTGTGCTGCTAGAGGTTGGATCAGAGATCACCAGCAACA  
 GAGCAACATTTGATGTATACAGAGAAGAGAGTGGCCCGGAAATTTGAACCCTGTGGCCACACATAGAGACTGCCAGA  
 GGTCCGGACAACAGGCCCTCCGATTTGACACACTGAACTCTATCAGAGAAGTAGTTGGTAAACCAGGCCAGGCAATCAT  
 TGAGAAACAAGGCTGTCAGCTGTTCCAATATAAGAATGTTGGTGAATTGACAGAGTCCGAAGCCTTGCCAGGTTGATGAATA  
 CGGCTGTACAGTAATGCTCTTATCGATGGCGGTTATGATGTCGTTTAGGACCCTGAGCGTGGCTGAGGTGCACCCATGA  
 CCAGCTCTGAAACCAGATTGCATAGCGGAGAAGGTACGGTGGGATTCGAAATGGTCCGTAATCTGTTGTTTAACTGGTT  
 TTCGAAGACCTTAGAAAGCAGGGTAGGATAGATAAGGTCTGTAGCAGTTTGGGTCAGAGTGTACCCTTGTAAAGA  
 GAGGATGACCATTGGCAGCTTTCCAACCTTTGGAACTCAGACATACGAAAGAGAGGTTGAACAGGCTAGTAATAGGG  
 GTTGCACAATTTCCGCAGATAAATTTAGAAAGAGAGGGTCCAGATTGCTAGCCCCGGCTGATTTGTATGGGTCAGATT  
 TTGCAGCTCTTTTCAGAACATCAGCTATCTGGATTTGGGTGAAAGAGAAATGGTGGAGGCTTTGGCGGGTGGCTGTGGAGG  
 GTCCGGGCGAGTTGACCGTGGTAGGGTAGCCAGGTGGAAGCATGGCCAGCCGTAGAGAATGCTTATGAAATTCTCA  
 ATTTACGTTGATTTTCGGTGGTAAACAGTGTTCCTAGCCTCAGAGCAGTGGGCAGCTGGGAGGAGGTCTCTTATTCTC  
 CATGGACTTTACAGTGTCCAGAACTTTTTTGTGATTAGTACTACAGGATGCAAATTTCTGTTGAAAAAGCTAGCCTTAG  
 CTTTTCTAACTGCTGTGATATTTGTTTCTAACTCCCTGAAAAGTTGCATATCAGGGGGCTATTCAATGCTAATGCA

GAACGCCACAGGATATTTTTGTGCTGGTCAAGGGCAGACAGGCTCGGAGTGAACCAAGGACTATATCTATTCTAGTTCA  
 ACATTTTTTTGAGTGGGCGATGCTTATTTAAGATGGTGAGGAAGGCACTTTTAAAGAATAGCCAGGCACTCATCTACTGACC  
 GGATGAGGTCAATGTCATTCAGGTAACCCCGGCCAGGTCTGATTAGAAAAGGCTGCTCGCAGAAGTGTTTAGGGAGCGT  
 TTGACAGTGTAGGGGTGGTCGTTTTGGTCGCCACCATTACGGATGCGAGCAATGACAGATGATCGGATGATATCTTTG  
 ATTGAAAAACAGCAGAGGTGTATTTGGAGGGCGAGTTAGTTAGGATGACATCTATGAGGTTGCCCGTGTTTATGGATTTGG  
 AGTTGTACTCTGGTAGGTTTCATTGATAATTTGTGTGAGATTGAGGGCATCAAGCTTAGATTGTAGGATGGCCGGGTGTTA  
 AGCATGTCCAAGTTTAGGTCACCTAGTAGCACAGCTCAGAAGATAGATGGGGGGCAATCAATTCACATATGGTATCGAG  
 GGCACAGCTGGGGCAGAGGGAGGCTATAGCAAGCGCAACAGTGAGAGACTTGTCTGGAAAGGTGAATTTTTTAGAA  
 GTAGAAGCTCGAATTGTTTAGGTACGGACCTGGATAGTAGGACAGAACTCTGCAGGCTATCTTTGCAGTAGATTGCAACA  
 CCGCCCCCTTTGGCAGTTCATCTTTGGCGGAAAATGTATCGTTAGCGATGGAGATTTACGGGAATTTGGTGGTTTTCTT  
 AAGCCAGGATTCAGCACGGCTAAGACATCCGGGTGGCAGAGTGTGCTAAAGCAGTGAAGTAAACAAAACCTTTGGGAGTA  
 GGCTTCTAATGTTAACATGCATGAAACCAAGGCTTTTACGGTTACAGAAGTCAACAAATGAGAGCACCTGGGGAGTGGGA  
 GTAGAGCTAGGGCACTGCAGGACCTGGATTAACCTCCACATCACCAGAGGAAACAGAGGAGAAGTAGGATAAGGATACGGC  
 TAAAGGCTATACGAACTGGCCGTCTAGCACGTTTGGACAGAGAGTAAAAGGAGCAGGTTTCTGGGCATGATAGCATAGA  
 TTCAAGGCATAGTGTACAGACAAAGGTAAGGTAGGTTGTGAGTACATTTGGAGGTAAACCTAGGCATTTAGTAATGATGAG  
 AGAGATATAGTCTCTAGAGACGTTTAAACAGGTGTGTCATCGCATATGTAGGAGGTGGAACAACATGGTGGTTAAGG  
 CATATTGAGCAGGGCTAGAGGCTCTACAGTGAAATAAGACAGTAATCTACTAACAGGACAGTAATGGACGAGGATTTT  
 ATATTAGAGAGGCAATCGTAGCCAGTGAACATATGGGTCAGTGAATTTGGTTGGCTGACTGGGACAGGGCATTCAG  
 ACAGTTAGCAGGCCGATGCTAACAGTTAGTAGGCCGGGGCTAAACAAGCTAGCAATTAGCAGACTGGGTAGCAAGCAGG  
 CAGTTGGCAGACCAGGGCAGGCAAACTAGCAGTTAGCAGACCAGGACTAGCAAGTTAGCTTTGGGGGACGTCGCGATGG  
 GGTAAAGTCTGTTTTGCTCCTCTCGTGCAGTGCATGATAGACCAGTCGTGGAATTAGTGGGTGCATATTCATAATAA  
 GGTACAGGTCTTTACCAATCAAATCATAAAAAATTCATCACATTTTATTTGTACATGCTTCGTGAACAAACAGGTGCAG  
 ACTAACAGTGAAAGTCTTACTTTTGTGCTTTCCAGCAATTTAGAGAGAAAAATAAAAAATAAACACAATGAATA  
 ATACACCATGAGTAACGATAAATGGCTATATACATCGGTTACCAGTACCAGATTCAGATTGACATGCAGGGTCTAGGAGGTA  
 TTGAGGTAGATTTACATATAGGTAGGGTAAAGTGAATAGGCAAAAGGGTAGATAATAAGCAGTAGCAGCTGTGTATGTG  
 ATGAGTCAAAAGAGTTTGTGTGTCAGCATGGTGGATGTGTGTGCTACTCTCACCATGGGACAATACAGACAATAT  
 AAGCACTCCATAATATAACAGATTTGACAAATTAATTCACAGTGATAAAGTTTCATACATCAATGGGTGATACACAGCA  
 GAACACTTTTTAGAACTACAGAAATAGTTCAGACAAGTCATATATGATCATAACAAATGAACAATACCTCCCTCTGT  
 TTTCTCACTTCAACAAAAATAACAACATCTCACATCTGACTATATCTCTCTCCCTCTCTCTCACACACTTTGTCTACTT  
 CTCTTTAGTCGAAGTCAACAGGAAGTATGCCAAACACAGTCCCTGTGAGAAATAACAGACTACCTGTTTCAACATGTT  
 GCTGTTTCTGACTGTATGCTGTTCTGCTGAAAATGCAACATGAGCAGAGCAAACTTCCTAGTCAATTTCCCCTTTCTGA  
 TGTTTCATCTCAAATATGAGTTTTGGCTTTGTTAAAAACAAGGCTATTTGATAACATTCACCACCTTCACTTTTTACAGC  
 AATATTTATAATGCCATGATGCAGAGTATAGGGGACAAATAAATAGGGGTGGGTGGGTAAGAGGAACAGGAAGAGA  
 CTAGAGGGCTGACAGGCAGGAGAGAGAGCGAAAGCGAGAGAGGCTCGTCACGGTGATATGTGAAGCATAACTGATAGC  
 AATTAGTTGTGATGAAGAAAAGTCCATGTGAATCAGTGATGCCATACCTAATCAATGTGGACACAAGAAGATGATGTTT  
 ATCAGAAAAGTGAATCCAGAAAACACAGGTACGATAGCAATTATTTAGAGTGTTGGGTGGGTAAGGTAATGATGGCAGGC  
 GGGCAAGTACAATCAGGATGAGAAATTCAGTGCCCTGAGGAAGTGAGCAGGAAACCAGTCTGGTTTTTCAAGAAACCCCT  
 TCTTGAGATTATACCATATTATGCTTACAGTGGCTGTTCAGTCTGTATCACGCTAGAAAGTCTTCTACATGTGTGTTGGG  
 AGTTAACATTTTGATCAACTCTATTTGATTACCTAATACATTTTCTTGAACCAGTTCACAAATCTTCATAATGTACAAT  
 AGAACATCAGTTGATATATTTGTCTTATCTAATTTTTGTCTAGGTTTACTGAGACAGACGTAAATGGATGTTGTATG  
 GAATACCAGAGGGCAAAAGTTGAAACAGCTGAAGAGGAGCACTTTGGAGGATCTAATCATATTAAAGAGGGGGATGTTG  
 GGGAGGGATAGAGCAATAACAGGCAAGAGCAACAGTGAAGACTCCAGTGGGAAGAGGATGTCTGACCAGATATGGAC  
 AGACTGGAAAAGCAACTGAAAGTGGAGATGGGACAAAAGAAAAAGGATAACCTTATAAATCAAGCAAAAGGAGGAG  
 ACTGGAGCAGAGAGGGGGTTAGCACAATTAAGGGATGGATGAATTAAGTAAATGGATGGACCAGGAAAATACATGGCAAGAA  
 AGAGGGGATGGCGATGGTGGATAAAAACAGAAAAATACAAAACAGCAGAAACAAGATTTGGAGACGGACAACCATCACAA  
 GATTACAAGTTGGCACAATAAGACATCTTCCCTTTGACCAGTTGCCAAAGATACGCTGAGCCAGAGCATGCCCCAAA  
 CAGTTTATAACATTTGCTTTTCACTAAAAAGTACAGCAATTTCCCTTGTGCCACAATTAACAATAATCCGTTTTTGGG  
 TTTTCTTTCACATATAGAAAAAGAACAAACAACATCCAGTGGTGGAAAGATGAGGGGTGATTTTTGTGGTACAGAATT  
 TGTAGGTGTGAAATGTCCAGCGTGTGTTGAAATGAGTGTGATACCCCCCATTTTAAAGTCTTGTAGATAATAACTACTCTTT  
 CTGCCACTGTCTTTCCAGGCTCAACGGTTAACCCCTTACTTCCCAGACCGCTGTATAGACTGCTTTTACTCTGCAA  
 GAAGGAAGACGACTCAATGACCAGCGGTGCTCGTTCCAGGGGAGGAGAGGTGCCATTTGAACCAACACCTACATTCC  
 GGCCCCACAGAGCCCCACAGAGGTGATAGAATGTGAAACAACCTCCCTGTAATGATAACTAATAAGTACTGTGGTAAACA  
 TAACAAGTGTGCAATTAGCTTCCCTTGTTCACCATTGACACGCTGACTCACTTCAATGACAGAAGGGGAAAGCCGT  
 AAATAACTGTACGGTACTAATCCATTTGAAGCTCTCTATCATATAACTGTGGCAGGGACAGATATTAGGATGCTCTCT  
 GTACATTAGTAAAAATATTGAAATAATATTGCTTGAATGATTAACTAGGACACTAAATGAAGACTAGGCCACTAAATGAACTA  
 GGCACTAAATGAAGTACACTGACTAAATGAAGTACTAGGACACTAAATGACTGACTGCTCCACTCTCTTTTCTCCCTTCCAT  
 TCCCACAGTGCATTTCTCCTCAATGACCTCGCTGCAGAAAGATGATTTCTTTGACTTTGGTGGCTACTTCCCAAAAGCCGT  
 CGGCTTGACGACCAGCGGGTGGAACTACATGACGTCCCACCCCTTAAGCCGAAAGCCAATAAGAAGAGGAGCAGCGTAAA  
 AGATACAAAGCCTAAAAAGTCTGCTCCAATTGCAGTGCAGAACGAGGACTTGATACAATATGATTCTCATCTCGCAAGTAA  
 GTAACGTGAATCACCAGGCTGCAATTTGACAAAACATTTATTTGTCTTGTGATGATGAGAAAAATATCATGT  
 AGGCATCATGTATATGGTGTACGTTGATATCATGTTTACAGTGTACATTTGGCATAACAGATGAAGGATCTTAATTTTC  
 CTGCACACTAGCAAAATGCAATGACTTGTCTTTACATAAAATAACGGAAAACCCGCACTAACACAGTTATATTAACAGTA  
 TTTCCCTTTTCAAGTAGCTTAAATTTGGTTCAGTTTATAGCCCTAACCAGGATCATGCAACATCATGGAATAAACGTTCAA  
 ATGCTGTTGCTGCAGGATTAATTTACTGCAACAATACTGGTCAAATGATTTATCTTACAGCTATGTCATGTCTGTAACAT  
 GGGCATTTGGGTATTATGTTGTATGGTGAACAACATATCATGTCATATGGGGTATAAGCATCATGTTATGTGATGTTACC  
 TAGGTGTAATGTTTCATCTCCGTACTCAGGTCAGTGTAAAATAGGCATCAAACCAGTGTGTTTCTGACTGCTCTGT  
 TACTTCAGGCCAGGGTAGACTGGAGGAGCAGCGCAGTGTGGCCCCAGGCCTATGGATGATGAGGACTTCTTTTCCTT  
 CTGCTGAGTGTCCAGGGAGGACGCATGGAGGACGAGGACTGAGTTGCCTGGGATTTGGAACCTGAGAGATACACAT  
 GCTGTAGAGATAGGCTCAATGGCTGAGAGCATGGTGTAGTCTATAGAGCAATGGCTTTTGCTTATTACCTGG



CCTGTTTCAACCAGAAGAGGCAGGCTCCTCACCTATCTCCTGTTACAATGATCAAGGGGAAGCTGTTGACTGGTGAGAAA  
 ACGGTTCTGGGCAGACTGAAGATTGAGCTGATATAACTTCCTTCTCCCTTAGGTCTGTTAGCTACTTAGTCACAGACAG  
 TGTGCATAGCAAGGTTGAGGGTTCAGGTAGCCTAGTGGTTACAGCAATGGGCAGCTAACCAAAAAGTTGCTAGATCGAA  
 TCCCTGAGCTGACAAGTAAACATTTTCGTTCTGCCCTGAAACAAGGCAGTTGAGGGCAGCTGTTCTAGGCCGTCAT  
 TGTAAATAAGAGTTTGTTCTTAACTGACTTGCCTGGTTAAATAAATAAAAAATGCTAAAAACAACACACAGTACTGAGAAT  
 CAAATACTTTCTCAGGTTCTATCTCACAACCTCCCCATGTTGATCGTGGACTTCTCAACGCGGACAGAGTTATCT  
 ACTGATGGACAAAGGGAGCGAGGGATGGACGGATGGAAACGTGTTGGTGAATGACAGCACTGGAGCCCTGGGGAGGACAG  
 TGGGCCAGCTGTATGAGCAGGGGAAGGTCTGGTTCCCTCTATTATTAAATATCAGACCACATTTGAATGAACTGTGAAACT  
 TAAAGGGAAAATCCAACCAAAAAAGATTAATAAATAAATAAATAAATATGAGTTGTCTGTTGATAACAGACCCAGAATGTT  
 TTTTATGATGATGTTGGCCGGTGACACGTTGTTTCTTGAATTTAAATATCTTGAAAGTTGACTGCTGACTGCAAACCA  
 TTTTGGGACTGAATCAGAAGTGGATTAATTAATAAAAAAATACAAAAGATAGTTTTTTGAGTGGATTTTTCCCTTTAAAGTTT  
 CACTTGCAACACATAGCAGTATTTACCACTGCTGAGGTTTTATTTTTGGTAGCTGGCCATCCCTTTTTTCTTTGTCACAG  
 TGGAATGAGACAGAATGACACAACAAAATCGAATGTGGATCTATAACTTTTTTGTTGGGTTGTTTCTTTACTGTTTAAAT  
 TTTCTACTAAGGTGGAATTGGAGTTTTCTTTTACCCAGACAGCCATGATAAATAAATACAGCATATTACATGTTATCAA  
 GAACAAAACAATGGCAGTATAACCTTGGTTGTTTCTGAGTTTAGAGTGTGCAATATGCATGAAAGTGTATATCTTCT  
 GACGATGAGTGTGTACTTTCTTTTCAGAAATGATGACATATGCATACATCCTGTACAATGACCAGAGACCACCCGAGGA  
 GGGAGAAGAGGATTTGGTTTCTTAGTAGCCGAGGTGCCACACAATAAGGTCAGGACAATGTAACCTCAGCTGTATAC  
 TGTATACAGGCATTACATTATAATGTTAACTCAGCAGCCAGGCCCTGACCAGCTACTCCATTTGTAGCATGTTTCAAT  
 TTTATGTCTGACAAGAGATGACTGTTGTGAAATGACTCAGTTTTCAATGAGTGTGTTATCTCCCTCTCTCCATCT  
 CAGGTGTTGTCTTATGGACAAGACACAGGGCTATTGGTTGGTCCACAGCACCCCTCATTTCCTCCCTGTAAGGAATA  
 GGCAATATTTCCTACCAGGTAGTGGTGTACAGAACGACAGAACCTTCACTGTGTGACTACCACCTGGAACGCTTTCA  
 GGCCATTTGGTGAGACTGTAATCCTGTAAGGTCATTTGAATACATAAATTTACCTTAGAATTTGAAAAAGTATCTTG  
 GATTATCCACCTGTTATAATGCATGAACTGTCAATGTTTTCATGAGACACAATAATGTGTTCTGTTTACTGCTGAGACA  
 GACTGCTGTGCGTACAACCCGAGCCGACAAGGTGGAGAACTGTTGACTGCCCTTGAGCAAGGCATTACACCTAATA  
 TTCTCCAGGGGTGCCGTACTACTATTGCTGACCCTACAAAATAAGTGCATATGTCATAGTCATTCTCCACAGTAATAGTGG  
 GTCTCTGATGATAAAGTACTGCTGCCCTATCACTGAAAACCTGCATGCAATGAACTAAAAATGACAATTAACCTCATT  
 ATTAGCAACAGTTAATAAAGCCACATTAATGTTGACACAACAATGTTGAACCAAAAATAACATTTGCATAAACAATTTA  
 GGTCAATTAGCATTTTAGCATATTGTAGTAGCAAGTGCCACTACAACCTGGCTAGGAAATGGTGCTGTTACCATAGTGACA  
 GATGGGGTTATCCCTATATGGCATTGTAACCATAGAGACCATACTCTCCCGCTGTGAGATGTTTGCTCTATAAAGTTGAT  
 GTCCTCTGTTGGTTATGACTGAACAAAATAAACAACATACACACATGTTTGTTGGTGAAGTAGTGCAGCCATGGAAGA  
 TGGGACATTTTTAGCTTTCCAGGAATTGTTTACAGATCTGTTGACTGTGGCCGTGCATTATCATGTTGAAACATGAGGT  
 GATGGCGACGGATGAATGGCATGACAATCGGCCTCAGGATCCCATTTGTTGGTATCTCTGTGCATTCAAATTTGCCATTGTT  
 AAAATGCAATTTGTGTTGTTGTTGCCGTAGCTTATGCCGTCCGATACCATAACCCACCGCCACCATGGGACACTATGTTCA  
 CAACGTTGACATCAGCAACCGCTCGTCCACACAACGCCATACATGTGGTTTGCAGTTGTGAGGCTGGTTGGACGTAATG  
 CCAAATTTCTTAATAATACGTTGGATGCAGCTTATGGTAGAGAAATGAAACATTCAGTTTACTGGAACAGCTTTGGTGG  
 CATTCTTGCGACTGAGCATGCAAAATGCACACGCCCTCAAACCTGAGACATTTGTGGCATTTTGTGTTGACAAAAGAG  
 AGGCATTTTATTGTCCTCCAGCACAAGGTGCACCTGTGAACATGATCGTCTGTTTAAATCAGATTTAATAATGCAACCT  
 GTCAGGTTGATGGATTATCTTGGCAAAAGGAGAAATGCTCACTAACAGGGATGTAACAAAATTTGTGCACAAAATTTGAGA  
 TTGAAAAAGCTTTTTGTGCATATGGAACATTTCTGGGGTCTTTTTATTTTCACTCATGAAACATGGGACCAACACTTCAG  
 TGTGTGTTTATATTTTGTTCAGCTTAAGATGAGTGTCTAATTTGATGTTGGAGTCTCAGTGGAGGCCAAGTTCAATC  
 GTCCTCAAAGCATTTCTTGTCTTAAAACATTTTCGATCTCAGCCACAGTCACTGGTCTTGTATGTACAGGGCCTTGTCT  
 GCTACTCTGTATGAAAATGTGAAAAGTCATCATACTAATAAGTCATGTTCTAGATTAAAGATAGTACTTGTCTTGAACCT  
 TGGTGCCATTTTTTTATTTTATTTAACTTTTAACTAGGCAAGTCAGTTAAGAACAATTTCTTATTTACAATGACT  
 GCCAAACCCGAGCAGCTATTGAAATCACAAGCAGACAGCAAGACAGACAGATTGATCAGTCAATTTAATGCTT  
 TACTTTTGCACAATTCCTTGAATGAAATGTTTGAAGTGTTCAGTTGAAGTGTTCAGTTGACATGTATTATGTTTAAAT  
 TGCAGCGGAGCAGTTGCAGATCAACCAGCCCAATGTGTATGACTGTGGTGTCCCTGCTTCCCTTGGCCTCTCTGGTGCCCG  
 CACTGGCTGACGCTGTAACAACAGCAAGGGCAGATGGCCTATAGCAGCTTACCACACACCAACCTGCATCCAATCGC  
 AGTGTGCCTCTCACCCTCATTGGGTGGAACCGAGTTCACTCAGCTTTGCCAAGGGGAGATCATTCAATAATGGTAAGGAACA  
 ATTTTGAACATATTAATTTGTCAATTTTTTGTACTGTAAAGATGACTATTGATGTCATTACCGTTTGTTCATTTGTGATTT  
 ACCCAACATTTAAACCAATATCCCAATTTCCCTCCCTCCTGTCTCCCAATGATCTGTGACTCTGACTCTCCCTGGGCTCCCT  
 CCTCCAGTTCAGACTTCTAGTCCAGTTCTGGATCCGCTCCACTGGCATCTGCCCCTGACTGCTCCCTGGGCTGGAAG  
 GTCCTGGACATCCAGCTTATCTCCCAGGCGGCAGGATCACTTCAAGGCCCTCAACGACCCTCAAGTGGGCCGTGAG  
 TACCACGGGGGTGGGTTGGATGGAGCTGCTGGCTGGGTGTGTGTGGGGCAGATCAACCGCAACGAGGCTGAGGAGAAGA  
 GAGGGGGCGGGACGGTGTGTCTGCAGGACGCCACGGTGTGGAAGGCCATCGGACAGCGCGCTGGAGTGTGAGATGTGC  
 GGGGGTGGGACTAGCGGGTGTGATGTTGGCGTAGAGGATGCAAGGCACTACCAGGGAGATGAAATCAGTAAGCATCAGT  
 GTGGCACCAGTGAAGTTACTAGTATGCACACAGTTTCACTGAGCAGCTAGGTTTTATTAGCATTATTGAGCTCCGTGAAC  
 AAGGTACCCCATAGAATGTTGATTAATAAAGTACCGGCAATAAATTCACTTTTTTTTTTATGCAAGTTTTGGAGTGTTCAT  
 AAATTGCCATGAATAGAAACATACTTGAAGGGAAGTGGCACTCCTATAATCATTAACAATGAGCATTTTGATACATTC  
 GATGTAGTTCATAAGTTGCTAATGACTGTAGGCAATGTTGATTGTGATCTCAGGTATGTTTTTAGACATTTTATATGTC  
 TAAAAACCTTTTTTATGTGACAAAATGATTAAAAAAATGATTGTTAAAGTATGTGAATGTTTTTCTTAAATTCCTCTT  
 TTACATTTTTAGTCAACGTTTTGGTGACTTTTTTACGTTTTTAGCTTGAACAGGCAAAGATACTGACTGTCACCTGTCCAA  
 ATAAAAGAAAGTACTGTTGTGGGGGTGCACAATAATTTGCAATAATGTTCTTCATTAACCTTCTCATCCACCAACAAG  
 CTAGATACTAAACACAGCTGTAATCTTTAGATGTACATCTTTGTTACATTTTATTTGGTAAGAATAGACACAGCAGAATT  
 ATAGCACACATCCGGGGAGTTCATAGAAAATCCTCATATGCGGTACATCAAATGCATTCATAGAAAAGGAAATGT  
 ATCACAAAACAATGGGGCATATGTAGTGCATAAATGCCAGCTTATACAGCACTGTGAATGTACATCATATGTAC  
 TGTACATTTCAATGCATACATCACAGAGGCTTCATGTCAAATGGCACCTTATTAAGCGCACTACTTTTTGACCAGGGTCCA  
 TGGGCTCTGGTGAAGTAACACTCTATATAGGGAATAGGGTGCCATTTGGGACACTTTAAGTGGCTCAAGCACAATG  
 AGAAAAGGCACTAAAACATCAGTAGCTTCGCTGGGCTAACACTTCGTCAAATTACGTTACCCAGAATCCTCTCTCTCT  
 CTCCTGGAACCTACCGTGTCTATGCTTACGCCTTAGTAGAGACTTCAACAGCACTGGGTAGTATGACCAGAGTTCAACG

AGTTCATCAGTTAGGGCCTTCCACAATCTGTTCCCCATGCGCCCTTATGCATACAGGTTTTCCTTCCACTGTTGCTC  
CACATGGGATAGAAGCAGAGCCTTCTGCAAAACCCTTACATTCAGTTCCTGGACTAAAGCCATTGCATAATGAAACCTT  
ATAGCTGTGAGTCTCTATCAAACGTCAGAGAACAATAACATTAACATCATTTCAGTGATTTGGTGGAGAATACTACTAA  
CCTGGCATGGGTCTTTGAGGACTGACTTTGGGAGCCTGTTGAAGTACACTTCAGACAGACTTCATTCACACTAGCAG  
CTAAACCATTTCAGAGACCAGCAATAAAGATTAGCTTATGCTGTATTGAAAAGTTTAGCATTAAAGGTGCAATGGTAGACA  
TCTTTTCAATACGCACAACATAGGTTAAGAGTTTGTGGGTGATGTTGTTTTGCCTAATGGTTAGTACTCAAAATAGGAC  
TTCTATATGGGAGTGGCAAGGCTGTATATGTATATGTGTTGTGTCCTTACATAAGATACTACCGGAGCTATCATTCAATAT  
GTATGGCACAACCAAGTGAAATGATCATGTTTTATCTTTGTAACGTCTTGGCCATTGAAATGGTTGCAATTTGGGG  
CAATTCATACATTTCTGTTACTTCAAATGAATAACATGTCATTCGACTTGTGATTGCTCCTTGTGAACGTAAA  
CACAAATCATGACATCGTCAACACATAAAAAACATATGCATCCACAAGTACATAGTTAAACATTTTGATGAGCCCCCGT  
GCTTTGCTATAATGAGAGCCTTCAGTGACTCTGTCTGTCACTTATTTCAGATGCATTATGTCATAATGTGAGCCAGTGC  
CTCCCCACCATTTCATATTTCTTCAAACGCCTTGAATACTTAATATGTTGTCATGCTGCTTGTATCCACTCTCTATGGAGA  
AATGGTCAACTTTGTTGTGGTTCATGGTCAATTCAAGGAGGTTCATATCGCCCAAATACTTTGATTTAATGAAGTTCTTTAC  
TATCAACTCATCTCTATGATGAAACCTGAGGCACATTCCTCAAATACCAAGATGATTGGATTCCCTCAGTTGCTCTTGG  
TTACAAGCTATTCATTTGGTTAAATAGGAAATTAGATGCCAATGGTCAGAGAGACTTAAGGAACAGCACCATTCAACA  
TCAGTTAAAGATTTGCACTGGTCTTGTCTCGGTGTATATTTGAAGTAGTATTTATGGCAACGAGAGAGACATGCAACC  
TTCTACACTAATGGACTTCCTGGTACACAACAGGCAGCATATTTATTGAAATGTCCAGTAAGAACAATGTTTCATC  
AAACAAGTTTCAGACAGGTTTTCAGGATACATTTTGCCTGAACTCGGTGAGAATGTGTTTCCACTTTGGAAAAAGATTAGG  
AAAGACAAGGCCACATCTCACTGAGATATCTGCCTGCATTCCTATCGTGACTGTCTTGGAGAAGAACTAGCTACATTAT  
GTCATTTGGGAAAGAGTTGTGTTGTCAAAAAACAGTCTCCGCCCTTGGCTTTGATTTCAGAGGAAAGGTGGCACTGGTTTC  
TGTGTGATTTGGTTGAGAGCGAAAAGGGGTGTTGCCTCTTGTCTGCACAGCAGGAAGTCCACACTAGAGGAAGTCATGG  
CATAGAAGAGTTTCTGTGGCAGGGATGACCAACTCTACAGGGCAGAACAAGAAAAGTACATCACTACAATCAATATGAA  
CAGAGAATCTTAAAGTGACTTCGCATGGTCTGGTGTAGAAATGCTTTTACCTTTTCCCTCGGGCAATAGTGTGGATGAGC  
TCATATCTGGGTGCCTGTTTGGGGTCTGACTGTGTTTTCTAAAGCCAGAACTGATCAGACTGGGCGTCTTGTCTATTGCT  
TGTCACTGAGGAAAACAGAGAAAAGAACAACAATACCAGACAGCTTGACTCCTAGTTATAATATCCTGTGTACAACCTG  
AGGAAAATTTTTGGATTACTATCATTAAACGGATATTTGTGGATTAAGTAAATAGTCATGAGTGCAGGGTGCAGTGCAGT  
GTATAATTTGATACCAAAAAGGCCAATCTCTAAAAATATGCCATATCTCGGCTCAGTACCAGTATGCTTCTGTACATA  
TTCCCATCTTGTAAATCCATCCGTATCCTGACAATCCGCATTTTCAGGCCAGACCTTTGTTGTTATTTGGTGGGATTTGTT  
GCCACAGGAGCTGATCGACAGATGTGATTTGACGGGAGTGATGGTGTCAATGCAGACGGGATGGGGTCAATGGTGGGAT  
GGGAGGACTCAACTCCAGCAGGAACTGAGGGGGATTTTCATATGTAATGATAAATAGTGTAGAAAATAATTTAAAA  
AACATACTTACTGATATGACAAGATAAAAAAGTGGCTGTTTTCGTGAAGGCCAAAAGCAAATAAAAAAGACACAGAAAGAAAT  
AAAAGATCAAATATTTTCTCTTTTAAAAAGTGTCTTCTGTATGTTTTTACGACATGCATTTGTTTTAAAAACAATCATAT  
TTGATTAAGGAAACAGCAATAGTTACTTAGCAATAACTACGAGTATTTGTACCTGAATAGTAATTACACGCTCTGCAA  
TTCTAGCTGGCAATGCAAATATATTTTGGGAAAGTACGTAATAATAGCTGTAATAATTTAGGTCTTATTTTGTAAATTACCT  
TAGTGAATTTGGATAGAAAAGTGACAGACGGGGAGGGGAAAGTCAAAATGACTGTCACTGTGACGCAACAAGGCTGGTCTCTG  
GAGGAATTCAGGCTGTAAGGAGGTGAGAGAATCATATCATGTATGTTTCATGATGACCCGTAATCTGACATGACAACAACCT  
ACAAAACATTTACTCAACCCTGAGAAATACATATGTAATGCTCAAGTTTGGTTTTTCACTCTTTCCAAATGTTTGTATGT  
TAATTTACCAGCTCTGTACTGTGTGAGGATATTTTTTATGAAAAGTACGGAGTACTTACCCCCAGACCCCCCAAG  
TCAATTTCTCCACAACGTGTTTTCTTATGGCCACGTTACTACAAATTTGACAGTCAAATAATGTTGGACACCCCTTCAAATTAG  
TGGATTCGACTATTTAGCCACACCCGTTGTGACAGATGTATAAATCGAGCACACTGCCATGCGATCTCCATAGACAA  
ACATTTGGCAGTAGAATGGCCTTACTGAAGAGCTTAGTGACTTTCAATGTGACACCGTCATAGGATGTCACTTTTACAAT  
TTCTGTCTGCTACAGCTGTAAGTACTGTTATTGTGAAGTGGAAACATCTAGGAGCAACAACGGCTCAGCCACGAAGTGG  
TAGGCCACAAAGTGCAGAACGGGACTGCCTAGTGTGTAATAAAGCGAGGTCTATATAGAAATGGTTTGTGTGATATCG  
GTGTTGGAAGAATTTGACTGGCTGCAGAGCCCTGACCTCAACCCATTTGAACAGCTTTGGGATGAATTAGAACACCAA  
CTGCGAGCCAGGCCTAACCGCCAACATCAGTGCAGACCTTACTAATGCTCTTGTGGCTGAATGGAAGCGAGTCCCCGC  
AGCAATGTTTCCACATCTAGTGGAAAGCCTTCTTAGAAGAGTGGAGGATGTTATAGCAGCAAAAGCGGGACCAACTTCAT  
ATTAATGCCCGTGTATTGGAATGAGATGTTGACATGCAAGTGTCCACATACTTTTGGGTTCATGTAGTGTAGTATAGTT  
CACAGAAAATGCTGACTGGCCATTTCTTTACAATAGTACTGAGCCCATATAACCAATGATATTTCACTATACATAGTGAA  
GGTACTGTCAGTGAATACTACCGGTATGTTGTGTGTAGAGTGTAATAATAGGCCTCATTACTTTGGCCACCGTGTGATGA  
TCACTGTAGGTTTCAGGACTCAGCCAGACTCGGTTGCGAGCAGCCACTCAATTTTCATTGGCAGCTGTAAGTCAGACA  
TCATGTAATGTGATTAGCGATCATCAGAGTTGTAGTGTTCGTTTTGAAAATAACATGTATGTACAAACTGAATGGTTTGA  
TTGTAATAAATGAATAAAACAAAAGATAATCAGCGCTTACCTTTCTTCTTCAATTTAGCGAGGGTACACTTTGGTACCCTG  
TAGGAATGCCTCGTCACTGATGAAAACACCGTTTTTTACAGGAGGACTGCAGTAGTCCGATCTGAGCTAAAACCTCAA  
CCTGCAAAAGAGAAAACCATTCAATATGAACATCAAATGACTCTCCAGTACTAATGGCACATATCAGTTGAAATGCTAG  
CAGTTAAACATGAATATGTGCATGGAGGCACTGTCCAGAATTAATCACTGCCACACATTTAATGAGAGGCACAACAG  
AAAAGCAATTTATGAAGACCATCTGCTATGTTGAGCCAGGCTAATGAATGGTCTGGATCCCTGGAATAACTCAACATG  
TGGACAATGGGTGCATGAGGAATTTAAACAGCAGCAGTGCAAAAGGCCGTGACCCATCCCTACTCGTCTCTCTGTGCAA  
AGTTGACGTAGCCGTCTGAAATGGAGGAACGGGATATATGTCACTGTCAATGCAACTTTTTGGTAAACCAACTACAAG  
TTCACCACCAGGGCTCTGACCAACTTCTGTTGATGGACACATGATGGGGATAAATTAAGTTGTATATGAAGGGACTCAC  
CTCTAGTCTGCTTTGACGGCCGTGTCCAGCATGGTGGGCTGTTGAGGAGATCCCAGGTAGGGTACTGTGCCCTGGG  
CACTGGACTGTGTGAGAGAGGGGAGGGGTAGAGAATAATGAAAACCAAAACAGAGGCATGGGGCTTCAAGGCTTCCAGA  
CACAGATTAAGCCTACTCAGTGCATGCTCAACGGAGAACTAGTTAAGACCGGTGAATGTACTGTATATCAAGTTGTCC  
TTACTTAAACATCAGATTCCTATATTTGAAGAATCCAGCATTGCATTTAGTGTACATCAGCAAGGGTATTTTGTGATG  
CCTTTGTACAGTACATTTCCATGCTTCTTCTTCAAGGCAAATGATAATGAGCTTTTGTGAGTGACTTCAAACTCGCTTAT  
AAGAGCACTTACTCTATCTGCTCCTGTTGGTCATCTTGCCGTCAGGTTGGCGAATTCGAAGTGCCCTCTGTCAAAA  
CACAGACAAACATCTAAGCATGATAATCTGGAACACAATGTAGAATTTAGAACCATGGCTATGTGCTCTAAAACCTGTG  
TAGTAACTGGATAGTAAGTGGGTAGTAAGTGGGTAGTGGCCCTCAATTCCAGACAACTGAGAGGGTAAGGAAGCAGCT  
TACTTGGTAAATTTAAAAGCACAGCAGAAGGCAGTGTGATATTTTTCCAAAATCAAAGCCTGGAGTGAAGCTTTCAAAT  
GAAAGCCCGTCATATGTTTCGATGAATCCTGTGTGGATGCCTTGGTGAATTCAGCTAATGTAAGGTATCGATGCAT





AAAATGTAACGAGTACTTTTGGGTATCAAGGAAAATGTATGGAGTAAAAAGTACATTATTTTCTTAAGGAATGTAGTGAA  
 GTAAAAGTAAAAGAAATCAAAAATATAAATAGTAAAGTAAAATAAAAATACAGATACCCCCAAAAACGACTTAAGTAGTA  
 CTTTAAAGTATTTTACTGAAGTACTTTACACCACGGTATTCCGGTGCATGTGACAAAATAACATTTGATTTCAACTCTAG  
 CTAGACTAGACTACTAGCCTTTGTTAGCCTTTGTAGCTGTGTTTACCAGCCTATAAACGCACCTGTGCACACATATG  
 ACTATGCAACAGACAGAAGGAAGGTTGAGTAAATATATGGACTGCAACCAGTTGAAGAGGATTTCTAGCCTTGGTTTTAT  
 TCAGTCAATGTACACAGAAAGAACATAGAACACAAGTCTTTTGGAGATGATTATTTGTGTGTTGTCATTAATGCTAGCC  
 TACAACAGGTACAGAAAACAGAGAAGCCTTTGTACTGTAGGCCATAAGTAGCACTGTGCATTCAACTAATCAGGGGGTT  
 ATGAACTAGGCTAACAGCACAGTGCCTGTTTTCTAAGGGACTGCAGTTGTAAGAGTGAAGGCTAGGCTTAGGCTACTGTAG  
 GTCTACTGTAGGCCCTCTTTTCCATGGTATTGTGTTTTTGTCTCAAGCAGTAGGCTAAGGTTAAGTTTACCTACAACCT  
 TTCTGGTACAGTTAGCTTACAGTATAACCCTTAATTTGGGACCATCCACATCAACCTCAACCAACCACAATCCCCACATC  
 TCAGTCTGTGAGTGGGATGGAACAGAGGCACCAATGAGGATGTCTAATATTGTGGCATGTAACAACCCCTACAATGTTTT  
 CTGTTCTACCAATGCACAAAATCTGTGAATCTGTTGGAGTGCATTTTCCCAACAATCAATACAAGGACTTGGCTGCTC  
 CGCTGTAAGGAAAAGCTGGCTCAGGGAGCAGATGATAATAATTATGGAAGTAAGTGGCTGAGGTTTATTCCATGAGAAAC  
 ATCTTGATAAGGAAAATTTGCTTGACTCTCCTCAGATACTGTATCATTCAAATCTCCCATTTTGTCTGCTCATGTTTACAG  
 ATTTTGTCCAACGTTTTCTTTTGTTCGCCACTTTTTCCATCGTTGCTAGTTTTAACTCAATGTTTTATACTCTTTATGTG  
 GAACCTCTCTCATGATTTCAACATGCTCCTTGCTCTATATTTCCATATTTTCTCTCCATAGAGGAAGTACATAATGAGCG  
 GAGACAAACAGGAAGCAGGACGTGCTGTGCTGACGAGCTGCTATTGTTTCTCTTTTCTCTTTCCCTACAACCCCGCCT  
 CCTCTGACCCTAGCATAGGATTGGTGCAGGGGGGAAAGGCCCTACAATCTACCACCTTCAACCCCTGTCTTTACAC  
 AGTCTCAAGTTCTACTTCCGTCACTTGTGTGCAACATCAGACATTTTGGGCTTTGTCCCTTAAATGAGTATCTATGGT  
 TGTATACAGTATGAACAAAATAGGTACGTGAGCAAAATGGGAGGCTATTGTTATGTGAAAACGTAATCCACCCTGAAAC  
 CAATATTGTTGACTACTTTACACAGCAATACAATTTGGGCTCGTAGATATATCCTCTGAAGTTTTATTTAAAGATGCCTA  
 TTGTTTGTTTTTTTAGTCCCTTGCTCTCCCTCTCAGGCTCCCACCCTTCTCCCATCTTTCCCCGCTCTTCTTCTCA  
 CGCTTTCATCTGTGCATCCCATTGCTACCTCTCTACTCTTTAAAGTGAAGCTGAGCCCTGGTGGTATGCCAGAGCTGCTCTATTCT  
 CTTATATCAAAGTCTTATCTGAAATCTCTTTTAAATCTTTGGTTGATGAAGATTGTTTTAACTANNNNNNNNNNNNNNNN  
 NNNNNNNNNNNNNNNNNNNNNNNNNNNNNNNNNNNNNNNNNNNNNNNNNNNNNNNNNNNNNNNNNNNNNNNNNNNNN  
 NNNAGCCCCGGGAGTTTCTTGAGACTGCATGCTAAGTGAAGTCAAAGCCAATGAGACGAGCATCATGTGCACTACGAA  
 CTAAGCCAAGTAGCAAGTGTATGAGAGTTAGTCAATGGGAAATGATGGAGTTAATTGATATGTAATTAAGAGACAATCA  
 ACTAAATGGCAATCAGCTTTTATCTTAAATGACCTAATGCGGTCTGCAATTATTGGGTGAATATAATGATTTGTCAA  
 TCAAAGTGAATGAATGACATTTGGCTAAGTGTCAATAAATGAAGTAGTATAATACCTCACAATGGAACAATATCTGTGT  
 ACTTTAGGTTGAAAAGGAGTAAACCCAGACATCAGTGACAGACAACAAGGCTGTGTGAGTAGAGTAGAATAACCCAG  
 AAATTTGACTGCCACAAGTCTGTGATAAAACCTTTACAGCCTCTGTCTCAGCCAATGGAAGATTAACAAGGTTATACAT  
 CGTGAGAGAAAACACGCGTGTGCAACCTGTCCAGGTTGTACACTTTCAAACAACCTAACACAACCCCTTCTGTTTCAG  
 GCGAACTCAACTGGATATAAATAGTGAAGTATATTAGAAAATACATGTAATATGGTCAATAAAAGTAATGCTCAAGAAAGC  
 AACATCTTAGCAAAAATGTTACAGTAGTCTACTTGGAAATCTCAAGACATGAGCATTTTATTCAATGCGTGGTGGTCAA  
 CATCATATCATTCACTGGCATGTTTTGATGGAAAGCACCTCCTCTTTAGTGTCTGTCTTTGAAATCAAATGACCAACCC  
 CATCTGCTGTTTACGCAAGGAATGGTAGGAGAGCCAGTCAACCGGTTTACAGACCCTGCTCTAATACCCTAACCC  
 CCTACCCTGGTTGGTCTGAGGAATGGGATCAAAATTTAAAGGGCAAGACTAAGAGGACAACTGACTTAAAGTGAATAT  
 GTAATTTTGTGGGCGACCCGACCAATTCACATAGAGTAAGTTATAGATCTGTTATTCTCATTGAAAGCAAGTCTAAAAT  
 GCTGTAGAGCTGTTCTATGTGAGCTATTTCTATGCTTCACTGTCTTCAGTTTTCATTTGTTTTGTACACCAGCTTCAAACA  
 GCTGAAAATACAATATTTTGGGTTATTGAAAAGATTTTTACAGCGGTTTAGATGGTGAATGATTCTAATAGTTTTGTTT  
 TTTCCAAGCACTGCACAGCTGATTCAAAATCAAGCTTGATGGTGAAGTTGGTTATTTGAATCAGCTATGAAGTGCTG  
 GGGCAAAAACAAAACGTCACCCGGGGAGGAGGACTGAGTTTGGGAAAACCTGCTTACACTATACTTGCTTGTTTTTG  
 TCACATAAACTGAAAATAGGCAAACTATTAGAATTTAGCAACCAGGAAATGGCAGAGCGATTTGCTGCACAGTGCATCTT  
 TAAATATATGTCACAGATGTGCTTCTGTATCAAATCAGCCATTTTATGGATTACCATATACCGTGAATTTCTTTATA  
 TGAGACCCTGGAGAAAGTTTGCTATATGAGAGAACAAGAAAACAGTGCCCCCATAACTTTACAGGTATTAAGTGAAC  
 TGCACCTGTATTTCTCTGTCACTACAATGAACTACTACTGCATTTTAAATGCTGTGAATGAGTTACTTACAGTACATGT  
 TCCTAATCAAGTTAATCAAATATAAAATCACTTCCAACCTCAGAGGAGTCCAGTCCAGTACTGTCACTCACTTGCCCAGA  
 TTGGCTGCTGAGGGGAACATCGTCAGGCGCTAAAGCGCGTAGCCAATGAGGGGTACATCCCTTGACTCCACCCTGGCA  
 GTCCATCCCACCTGTTGCTACACTACGAGGGATCAGTGTGCTCCGACAGCTAGAGACACAAAATAAACAATAGGCACATAT  
 GGGTTTAAATGGTGAATAATTTCAATTTCAACTCAGAATGTTGCTATAGTTTATGGACATAAACAACCTCGGAAAGGCATA  
 GAAAAATAAATAACAATAGTATATATACTGTACAATAAAAATAAATTTGTGTACCAAAGCTTTGGTGGTAGCAGTTCAATTTGT  
 TTACATGATGATTTACATTTCACTGTGCCCTGTCCAGCATTTGAATTTGAATGCCAGCTCTTCTTCTTTTCCATTTCTC  
 CCTCCCTGAGACATGGATTGCCATGATGATGGAATCTAGAAAACACTGTTTACACTGTAGGGCAGGAGGAGGATGTTGAC  
 ATGTACCCTATATATACTTAGAGAACGCAGATATTCATGTGATGATGCATTGCTGGTTCACATTAATGAAACTGTGT  
 CAGGACATTTTTTGCCAAGCAAGTGTGGTGTAGGCTACTGTATAGGAATGTACAGCATATGGATATGTCAGAAGACTTGC  
 TGTCTGTATGTTAATGTCATTACTTCAAGTATGATGCTAAAGGTTTAAATAGGTGAACAACAACATTTTATGTTTCT  
 ATCTTTATCTGTATAAATTAAGGTTTTGCTATTGTTATTTTATTTTACTGCTGCTCTTTAATTAATTTTGTACTTTTATTTCT  
 TATTTTTGTAGGAATTTTTCTTAAACTGCATTGTTGGTTAAGGGCTTGTGAGTAAGTATTTCACTGTAAGGTTCTACCTG  
 TTGTATTGCGCGCATGTGACAAAATAAATTTCAATTTGATTGTTGGGCTACCTGTTATATATAGGTTTTTGTCTGTGAAATTA  
 AATACACTTTTTCTACCCTACATGCACTGTTATACAATAGGCTTATATGGGACACCAATCAACTCAATCACAATCATCTTTG  
 GAAACATGGTACTAAACTTTTTAAGTGTATTTCAAGTCTTAAAGGCATGCATATAATTAGGCCTAGTGTATTAAAATATAT  
 ATATTGGTAATAGGAAAACATATCTGTAATTTGTGTGATATACTGACTGTTAGTCAATAACTTCCATTCATGACATTTG  
 TGCTTTTTGAGGAAAGCAACATACATGTTGGTGCATGAGTGCAGTGCATAGTCACTAGGCTACAGATGGCTCAC  
 CCCAATTGGATATGTTCCCTTTCAATTCACCAACCAGTGGTGGTGTGATTGATTCTCAACAACAAATTTGTTCCACC  
 TTCAATCATAGGAAACAAGACACTATAGGAATTAACCGGAATATGATGATAAAGTTTGCCTGTAAAGCCTTCGTTTCTTT  
 AGTAAACAAATACATAAGGTTTAGGCTATTTTATTGAAAGCCATATGATATTCAATGTCAAGGGGCCCTGCAATTAAG  
 AGATGATGAATATACAAAGTGTCAATCATGGCTGTATCGTATGAACGACTTACTGAATGTTGCGTGTCCAACATAGGTC  
 AGCTAAATTCGCCAGCATTGGATATCTGTAGTGTCTGCCGCGTGGAAATACGGTAACCGGTTAGTGGACGAATGTGC  
 CGCTCATCCGTTCCAGCACCGGACGTGGAAGAGAGTCTCTCTCCCCCTATCAGTATCTGTGTCCCCCTCTAGTTGCCCT







ACTCATCCCACACCATCTCAATTTGGGTTGAGGTCGGGTGATTGTGGAGTCCAGGTCATCTGATGCAGCACTCCATCACTC  
TCCTTCTTGGTCAAATAGCCCTTACACAATCTGGAGGTGTTGTTGGGTCATTGTCTCTGTGAAAAACAAATGATAATCCCA  
CTAAGTGCAAAACAGATGGGATGACATATCGCTGTGGTAGCCATCTGGTTAAGTGTGCCCTGAATCTAAGTAAATCCAC  
TGACAGTGTCAATAGCAAAGCACCCCACACCATCACACCTCTCTCCATGCCTTACCGTGGGAACCAACACATGCGAAG  
ATCATCCGTTACCTACTCTGCGTCTCACAACGACATGGCGGTTGGAACCAAAAATCTCAAAATTTGGACTCATCAGACCA  
AAGGACAGATTTTACCAGGCTCAATGTCCATTGCTCATGTTTCTGGCCCAATAAATTTCTCATATTTCTGATTGATGGTCC  
TTTGTAGTGGTTTCTTTGCAGCAATTTGACCATGAAGGCTGATTCACGCGGTCTCCCTGAACAGTTGATGTTGAGAT  
GTCTGTTACTTGAACCTCTGTGAAGCATTTATGGGCTGCAATCTGAGGTGCAGTTAAATCGAATGAACCTATCCCTGCAG  
CGGAGGTAACCTGGGCTTCTCTTCTGTGGCGGTCTCATGAGAGCCAGTTTATCATATCACTTCATGGTTTTGTCG  
ACATCACTTGAAGAAAATTTAAAAGTTTTGAAATGTTCCGATTACTGACCTTCATGTCTTAATTAATGATGGACTG  
TCATACTCTTTGCTTATTTGAGCTGTTTTGACATAATATGGACTTGGTCTTTTAGCAAAATAGGGCTATCTCTGTGATA  
CCACCCCTACCTTGTCAACAACCTGATGGGCTGAAACGCATTTAAAAGGAAAGAAATTCACAAATTAACCTTTTAACAAG  
GCACACCTGTTAATGAAATGCATTCCAGGTGACTACCTCATGGAGCTAGTTGAGAGAATGCCAAGAGTATGCAAAGCTG  
TCATCAAGGCAAAGGTTGGCTACTTTGAAGAATCTCAAAATTTCAAAATATATTTTATTAACTTATTTGGTTACTACA  
TGATTCCATGTGTTATTTTCATAGTTTGTATGTCTTCACTATTATTCACAATGTAGAAAAATGATAAAAAGAAAAAC  
CCTGGAATGAGTAGGTTGTGCCAACTTTGACTCATACTGTAGTTTCTAAGTGAAAACATTGCACCCTCTCAAGTT  
ATTGACTGTGTCTGTGTTGTTGTGGAGCAGCCATTTGTACCTGCCAGAGGAGCAGGTTGGGCCAGACTCA  
CGAAATCAAAGCGGCGCATCATGGAGACACAGGTGTTTCTGTCTCGAACCGGCAACAGGGGAGAGATCAGCCAT  
CAGTCGCCCCCTACTGCATAGCAAAGAGCTGCCTGGCATTGGAATGACTTGTCACTCATAGTCACTCACTGTGTGGAGA  
AAAGATTTCTCTTATAGCCAGTGTGTCTGTCTTACATATTCTTCAAAGCCAGCCTACCCCTCATACTATTGAAATGA  
AGCTGGTTTACGACTCGATCGAGTATGACAACATGTTATGGTCACGGGTTAGAAATATATTTTAAATATGAATAGAAA  
ATACACATCCTTTTATACTACTGCTCAGGCTGGCTCCCTTATCTGAGACAATAAATGTTATGGATCGGTCTGATTTTCAG  
CGGCAGTACTCCAGCAGACTGTTGTATCTGAGCGGACATTAATCATCTGCCATCTTGGGCGAGTGGTTATCTCCAG  
GGAAAGTGAGAGGGGAAAGTACGCTGATATCGGCCATCTGGGAGCGCTTCCAAGTGCATTTGCAGTCGATTAACAGTTT  
GCCAGGTGGCACTGGCACTTTGACAGTGCAGCATTGACAGAGCACCTTGATTTAAAGGGACAGCACGCTAGTAAGCGGAT  
AATGCTAGTATAACCTGCTGTAATTACTGTATATGTTGTGGTCCAGTCCAGCATTGGAGGTTGACAGAGCTGAGGGT  
GTGCTGAGAAGTGAAGAACAAAGGATAGATGGGATAGAGTACTGATGCTTTTGTGTTATGATAGTGAGCTCACACTAA  
GAAATGCTACCTCAATCTCCACAATATGAATCTACTTATCATAGGAAATGGAGGTGACAGATATACTATATATACAAA  
AGTATGCGGACATGGCTATTTCCAGCCAGCTGTTGCTGAACATCACACAGCCATGCAATCTCCATAGACAAGCATTTGGC  
AGTAGAATGGCTTACTTAAAGCTCAGTGCATTTCAAATAGAGCACGCCCTGTCACTGAAGTGTGTTATTTGTGAAG  
TGGAAACGTCATAGGACAACAACGGCTCAGCTGCAAAGTGGTAGGCCACACAAGCTCACAAGAATGGGACTCCACGTCCT  
GAAGCGTAGCGCGTAAAAATCGTCTGTCTCAGTTGCAACACTCATACTCGAGTTCCAAAATGCCTCTGGAAGCAGCGT  
TGGCACAGAAGTGTTCGTTGGGAGCTTCATTAATGGGTTTCCATGGCCGAGCAAATCACCATTGCAAGGCCAAGCGT  
CCGATGGAGTGTTACAAAGCTTGCCGCCATTTGACTTTGGAGCAGTGGAACGCGTTCTCTGGAGTGATGAATCACATTT  
CACCATCTGGCTGTCTGACGGACGAATCTGGGTTTGGCAGATTCCAGGAGAACTCGACCTGCCTCAATGCATAGTGCCAA  
CTGTAAAGTTTGGTGACCGTGAATAAATGGTCTGGGCTGTTTTTCATGGTTCCGGCTAGGCCCAATGACATTTCTAGAC  
TACTCCGGATGCTGCGCTTCTAGGCAGAGTTCCTCTGTCTCAGTCTGTGTTCAATTTCCCATCTTAAATATTTCTTTT  
TATTGGCCAGTCTGAGATATGGCTTTTTCTTGCAACTCTGCCTAGAAAGACAGCATCCCAGGGTCCGCTCTTCCCTGTT  
GACGTTGAGACTGGTGTGTTGCGGGTACTATTTAATGAAGCTGCCAGTTGAGGACTTATGAAGCGTCTGTTTCTCAAAC  
AGACTGAAGGCTACCTTCAAACCTAGTGCCTCTTCTTGTGACATCATAGGAAAATCAAAGAAATCAGCCAAAGACCT  
CAGAAAAAAATTTGTAGACCTCCACAGTCTGGTTCTCTTGGAGCAATTTCCAAATGCTTGAAGGTACCACGTTTCAT  
CTGTACAAAATAGTAGCAGAATAAACACCATGGGACACGTAGCCGTCATACCCTCAGGAAGGAGACAGGTTCTGT  
CTCCTAGAGATGACGTACTTTGGTGCAAAAGTGCAAATCAATCCGAGAACAACAGCAAAGGACCTTTGAAAATGGTG  
GAGAAAACAGGTACACAAGTATATATCCACAGTAAAACAGTCCATACATCGACATAACCTGAAAGGCTCAGCAAG  
GAAGAAGCCACTGCTCCAAAACCGCCATAAAAAGCCAGACTACGGTTTGCAACTGCACATGGGGACAAAAGATCGTCTTT  
TTGGAGAAATGCTCTGCTGTGATGAAAACAAAATAAGACTGTTTGGCCGTAAGGACAATCGTTATGTTGAGGGAA  
AAGGGGGAGGCTTGAAGCCGAAGAACCACATCCCACCGTGAAGAACGGGGTGGCAGCATCATGTTGAGGATGCTTT  
TCTGCAGGAGGACTGGTGCATTCAAAAATAGATGGCTGCATGAGGAGGAAAATGATGTGGATATATTTGAAGCAGCA  
TCTCAAGCAATCAATCAGGAAGTAACTTGGTTGCAATGGGCTTCCAAATGGACAATGACCCCAAGCATACTTCCAA  
AGTTGTGGCAAAATGGCTAAGGACAACAAGTCAAGATTTGGAGTTGGCCTACACAAGCCCTGACCTCAATCCATATAG  
ACAATTTGTGGCAGAACTGAAAAGCGGTGTGCGAGCAAGGAGCCACAAAACCTCACTCAGTTACACCAGCTCTGTGAG  
GAGGAATGGGCAAAAATCACCAACTTATTGTTGGAAGCTTGTGGAAGGCTACCCAAAACGTTTGCAGCAAGTTAAACA  
ATTTAAAGGCAATGCTACCAAATACTAAATGAGTATGTAACCTTCTGACCCACTGGGAATGTGATGAAATAAATAAAGC  
TGAATAAATCATCTCTCTACTATTATTCTGACATTTACATTTCAAAAATAAAGTGGTGATCCTAATGACCTAAGGC  
AGGGAATTTTACTAGGATTAAGTGTGAGGAATTTGAAAAACTGAGTTAAACGATTTGGCTGAGGTGCAAACTCTTCC  
GACTTCAATTTGATGATATCCATTATAAATCAGCCGATATGATCATTTGATACAGTATGTTAATGACCTTGGTTTTTA  
TTTTAGATGATTTCAAGCAGTATGAATTTCTTATAAAGATAAAGGACATGAACCTGAAGTATCATGTCTGTGATTGGA  
TTCATTTGATTTGGCGTCAAAAACACTAGCTAATCAGTGTCTCTCTGTGTCAGCCTTGTCCGCCCCCGTCCAGCCACC  
CCAATAGATCTTTGTCATGTTGCCATGGCTACGTAGGTTGAACTAACCTCTACAACCTCAGGAAGTCCGAGGAGGAGCT  
GAATTTGGGGTTGGTGCTGTTATTGATTGGTTACACTTTACATACTGTATAACAAGTAATAATGCATTGATTGTATTT  
ACAGTGTAGCTTTTTTTTTACATTTACATCTCATTTGATTAGGCTACCCCTTATCAAAATCAAATTAATATGTTGGTCA  
CATAACGATTTTGTGACATGTTGGCATGGCTACGTAGGTTGAACTAACCTCTACAACCTCAGGAAGTCCGAGGAGGAGCT  
CCATGCAATTTGTTGTTTGGTCCGTTTTTTTTATTGTTTATGTCCCTGTTTTTTCCACAGTTTCCCACTAAGCGGAT  
GTTTTGCCCTGTATACCCACCTATAACAGAGCCAGCCATCTCAGAACCTGCATCACTATAGGTCAGTATTAACCCCA  
GCTCTCTGTCTCTCCGGGACTACCCCTCAATCTAGACATCTAGAGAGGAAACCATAGCTGTGCCTGGATGACAATGGAA  
AAAAGTATGAATCGTGAATATTAATTTCTCTCTCTCTCTCTCTCTCTCTCCAGTGGGAAGATCCTTGTGAGTG  
CCGCCCCCTGCCTCCCCCTCTCCCTGTCACTCTCCACCACACCACACCAACACCAACACCACCACAGCAGCA  
GCACCACCAGCACCGCTGGCCAGAGTTGGATCCCTGCCCTCCCTCCTGTGTGAGTGCCTTCCATCTCTGGCG  
GTGTTGGGGGGAGGGCTGGGGGGATGGGTGAGTGTGAGGGGCTGGGGGGGGGGACGGGGTGGAGATTTTGGCGAGG







TGACAGTAGCAGATAACCTCTCATTACTCATTGATGTAATGACTATAGAACTTGACATTTGAATGTTAGTTTTGTTTTCTGATAT  
 GGCCTAAGGTTTTAGGAGAGTTACAGTAGCCAGTCATGATGTCATAATGTGCTGACAGGACTTTACAGTCATCTTATTACA  
 GTGTTATAAAGGCAGACGGCTAAATCAAATGGGATCTCAAACCTTCAATATCATGCTAGCGCTGGGCTAAATTTGTCCCC  
 CCTCTCTGTGATGCTAATAGGTGGCTGATATATGCAGTGTGCTAGTGTGCTACTTTTACTGAAGGTGGTGAGAAAAGAGGAC  
 CGAATTTTACGGGATGTACCTCTCATTCACTTCAGATGCACAGATACTGCAGAGAAGAAATGGTGCATTTTAATTAGCTG  
 TAATCAAATACACTGGATATGCTGATATCAAAAAACAGGGGCCATCGGACCCTGACATTTACAGAGTAGTCTATTACCA  
 TTTTAAAGTGTTCCTACTATTACACATTTAGGGTAGTGTCTCTACTTCAGAAGAAAAAATCATTTACAAGGCTCTCACGT  
 ATGTGTGTGTGTGTGTCCTGTCATGTCCTGTCATGCTTTTGTGTGTGTGTGTGTGTGTGTGTGTGTGTGTGTGTGTGTGT  
 GTGAGCGTGTGTGTACAGATGTAGGATATTAATTTGATCACCCCTGTTGCAGGACCCTGTAGTGTATTTGAGGTTTTA  
 AAAAGGCTTCTGAAGTTTGAATTTACAGATTTGATTTCCCTTATGGGAAGATGTATCAACCCACATAATAATACACAT  
 TCCTGTCGCTGCAGGATTAATTTCCCTGCTGTAGCAAACCTGGTTCAAATTAAGATCCTACACATGTGTGTGCATGTGTGT  
 TGTGTGTAGGTGTGTGTGTGTGTGTGTGTGTGTGTGTGTGTGTGTGTGTGTGTGTGTGTGTGTGTGTGTGTGTGTGTGT  
 TGTGTGTGTGTGTGTGTGTGTGTGTGTGTGTGTGTGTGTGTGTGTGTGTGTGTGTGTGTGTGTGTGTGTGTGTGTGTGT  
 TTTATTTGAGTGATTAACCTTCTACTCTGAAGACCTCATGAAGGTTAGCGCGCTCACCTGCATGCCCTGGCGCTATGTTTA  
 GCATCTCATCTCCACCACATTTGAATCTTACCACACAAAAATATGACTGCATTTCAACTGTATTTGCTTCCAAAAGAAAAT  
 TCTGGCATTATGCAATGTTTATGTGATATGCCCTTTTGTATTTCAAATAATGATTCATCTAAACTGGAGTGGATTTGT  
 GAGAGACTGGAAATGCAATCCACTTCTAGTGTTTTTATGTAAGTTTTCTTTTTCAGGAGGAAAGCTCCTGCTTAGT  
 GGTTTTTCAGAGACCTATTATTTACAGTTGTTGCTCTGTTTGGCATTTCATGTGGAGTTGAGTTTCTCTGTATGAGAGTGG  
 AGATAATGGCAGAACATCCTGATCTCTTGTATCAGAGGCAGTGTCTAACTGGTAGAAAATGGACTGCTGGGAGAGGAAGGT  
 GTGAGACACCTATGAAACACTTTTAAATGTAGCTTCTCGCTTCAATGTCATGTTTGAATCTCCTTTCCCTCCATGAATAT  
 ACTACACTGGAATTCACACTCACTTTAAAACACAGAAGCTGGCTTCAAAGTGTCTCACTTTGTTTGACCTACCGAGTGGTG  
 AGTGTTCATATTATCTAGGGGTGAAAAGTTGACTGGGATTTGTGTGACTNNNNNNNNNNNNNNNNNNNNNNNNNNNNNNNN  
 NNNNNNNNNNNNNNNNNNNNNNNNNNNNNNNNNNNNNNNNNNNNNNNNNNNNNNNNNNNNNNNNNNNNNNNNNNNNNNN  
 NNNNNNNNNNNNNNNNNNNNNNNNNNNNNNNNNNNNNNNNNNNNNNNNNNNNNNNNNNNNNNNNNNNNNNNNNNNNN  
 TGAGACCTCCACAAGTCTGGTTTCATCCTTGGGAGCAATTTCAAATGCCTAAAGGTACCACATTCATCTGTACAAAACA  
 TAGTACGCAAGTATAAACACCATCCGACCCTCAGCCGTCATACCGCTCAGGAAGGAGACGCATTCTGTCTCCTAGAGAT  
 GAACGTAGTTTTGGTGCAGAAAAGTGCAATCAATCCGAGAACACAGCAAAGGACCTTTGTGAAGATGCTGGAGGAAACAGG  
 TACAAAAGTATCTATATCCACAGTAAAACAAGTCCATATCGACATAACCTGAAAGACCGCTCAGCAAGGAAGAAGCCAC  
 TGCTCCAAAACCGCCATAAAAAGCCAGATTACGGTTTGAACCTACACATGGGGACAAAGATCGTACTTTTTGGAGAAAAT  
 GTCCTCTGGTCTGATGAAAACAAAATAGAAGTGTTTGGCCATAATACCATCGTTATTTTTGGAGGAAAAAGGGGGAGGC  
 TTGCAAGCCGAAACACCATCCCAACCGTGAAGCAGGGGGTGGCAGCATCATGTTGTGGAGGTGTTTTGCTGCAGGAG  
 GGACTGGTGCATTTACAAAATAGATGGCTCCATGAGGAGGAAAAGTTATGTGGATATATTGAAGCAGCATCTCAAGACAT  
 CAATCAGGAAGTTAAAGCTTGGTTCGCAAAATGGGTCTTCAAATGGACAATGACCCCAAGCATACTTCCAAAAGTTGTGGCA  
 AAATGGCTTAAGGACAACAAAGTCAAGGTATTGGAGTGGCCATGACAAAAGCTCTGACCTCAACCCAATAGAAAATCTGTG  
 GGCAGAACTGAAAAGTGTGTGCGAGCAAGGAGGCCACAAAACCTGACTCAGTTACACCAGCTATGTCAGGAAGAATGGC  
 CAAAATTCATCCAATTTATTGTGGGAAGCTTGTGGAAAGCTACCCAAAACGTTTGACCCCAATTAACAATTTAAAGCC  
 AATGCTACCAATACTAATTTAGTGTATGTAACCTTCTGAAACCTGGGAATGTGATGAAAGAAAATAAAGCTGAAATAA  
 AAAAATTTCTTACTATTCTTGTATTTTCAACATTTCAAATAAAGTGGTGTATCCTAACTGACCTAACTGAGCAGGGAAT  
 TTTACTAGGATTAATGTGAGGAATTTGTGAAAACCTGAGTTTTAAATGTATTTGGCTAAGGTGTATGTAACCTTCTGACTT  
 CAACTGTATATATACAGTACCAGTCAAAGTTTTGGGCACACCTACTCATTCATGGGTTTTTCTTTATTTTTTACTATTTT  
 TACATGTAGAATAATAGTGAAGACATCTTAACAATGAAATAACACATATGGAATCATGTAGTAACCAAAAAGTGTAA  
 ACAAATCAAAAATAGTACAGCCTGGAGGTGTGTTGGGTATTGTCTGTGTAAGCAAAATCATAGTCCCACTAAACGC  
 AAACCAGATGGGATGGCATATCGCTGCAGAATGCTGTGGTAGCCATGCTGGTTAAGTGTGCCTTGAATTTCAAATATATC  
 ACTGACAGTGTCAAGCAAGCACCCACACTATCACACCTCCCTCCATGCTTACAGTGCAGAACACACATCAGCAG  
 AGATCATCTTCTCCTACTTCTGCTTCTCACAAGACACGGCGGTTGGAACCAAAAATCTCAAATTTGACTCATCAGAC  
 CAAAGGACAGATTTCTGCGGTCTACCACCCATTGCTCTTGTCTTGGCCTAAGCAAGTCTCTTTTTCTCATTGGTGTCT  
 CTTTAGTAGTGATTTCTTTCAGCAATTCGACCATGAAGCCGGATTACGCAGTCTCCTCTGAACAGTTGATGTTGAGA  
 TGTGTCTGTTACTTGAACCTCGTGAAGCATTTATTGGCTGCAATCTGAGGTGCAGTGAACCTAATGAACCTATCCTCT  
 GCAGCAGAGGTAACCTTGGGTCTTACTTCTCTGTGGCGGCTCCTCATGAGAGCCAGTTTCATCATAGCGCTTGTATGGTTGA  
 AGTTCTTGAATTTTCCGATTGACTGACCTTCATGCTTAAAGTAATGGACTGTCGTTTTCTTTGTTATTTTGGGCTG  
 TTTTGGCCATAAATAGACTTGGTCTTTTACAAATAGGGCTATCTTCTGTATACCACACCTACTTCTGACACAAAC  
 ACATTAAGAAGGAAAGAAATCCACAAATTAACTTTTATCAAAGCACAACCTGTTAATTGAAATGCATTTCCAGGTGACTAC  
 CTCATGATGCTGGTTGAGGGAATGCCAAGAGTATGCAAAGCTGTCATTAAGGCAAAGGGTGGCTACTTCGATGAATCTCA  
 AATCCCAAATATATTGTTGGTTTACTACATGATTCCATATGTGTTATTTCATAGTTTTGATGTCTTCACTATTATTCTAC  
 AATGTAGAAAATAGTAAAAATAAAGAAAAACCTTGAATGAGCAGGTGTGTCCAACTTTTACTGTTACTGTATATAAA  
 GATCCCTCCATGCCCTGGCCTATATTCACGGCCTATATTTGTGATTTGGTCAAATTTAATGATATGTGAGTGTATAT  
 GAAAACCCCTAGGGGGCTCAGTCACAATAGCCACTGTGACTGTGAGTCCATGAGTGAAAAGTGAACCTAGAGGTTGAAATC  
 AAGTTATGTAATCTCTCTCATATCGTACAATGAATCATACTTGGATTCCACCCTGTGATCCCTTAATAAGCTTTG  
 CTTGTTTAGCAACTCATTTATATTTCAAAGCAGCTTTATTCATAATTAACCTTGAATATAAAAACATAAACTCAGCTGTA  
 TTCGCTACAATTAGACAGATTGCCTTTTGTGCTTGCCTTCTACTTGGTAGGATTGTGAATACAGTAAATATTTGAGAAA  
 GCTTTTATTGTAATAAAGGTTTCTGACAGGGTTGTTTGGCTGAAGTAGGCCTATTTTCAAGGTCGGAGTGGCTCTGTTT  
 TTGGCATAAGTGTCAAATGGACAGCATGGCACGCTGTGTGAGTGTGCCAGCATGCCGTGTCTCAGCCGAGTCAGGGCCT  
 GTTACATCAATCAACCTGCAGGGGCTTCTTTCTCAAACATGGGAAAATATGCAAAGGGTAAAGTGTGCTGTCTGGAA  
 AGTAAAAAGTAGACTAGATAGCCATTGTTTGTACCATCTACAAGATGTATGGGTAAAGGTTAAATAAAGTGTGTTAG  
 AGGTTTACTCTGGGACTTGTACAATCTGCAGATATGATGGTGTGAATTTGAAAACAGTCTTGGTGTGAGGAGTGGG  
 GAATGTCATTTGGCTAACCTCTCGTTGAGGGCTTGTTCGGCCTTGTGGGGCGTCTGTGAATTCACAACATAAGGC  
 TGTCTGGAGTGAGAAATAGCGTTGAGATGTTTGTCTTAACTTCTGGTTGAAATGTAAAAACGAGGCGAAGGAAAGAGATAT  
 CAAAAGTGTTTTGTGAAAACATTAACATAGCCCTGACATAACTTAGAGGGAAAAGAGAAAATATGAAAGAGGGGA  
 ACATGAAAAGAGACTGGAGGAAAGCAGAAATAGGAAGGTCAATACGAGAAAAGACATGAAGTGTGAGACAGATGAGAGAA  
 GGAGAAGCAGATGGATGGGCAGAGTGTAGTAGGAGTGTAGAGAGACACACTAGGAAGTGGAGACTACGAAAAGATAGTGAA

AAAGACAAAACAGCCATGCCCTGGTTATTTCTGTGTGACCTAGCATCATGCTGACTGAAGCCAGAGCTTGGCTAATTGACT  
 TCAGCAGTTGTAGTGGATCACAAAGCTTATTTTGTCTGTTTTCATGCCACGGCCCTTCTGCTTCAGGACCCAGGGTCTAT  
 CTGAAGAGACTGCCTGTTGTTACGGCCGCTGTGGTCAGAGGGGAACCTGGGGACGAAACAAAGGCGTGTCCAGGCCAGAGG  
 GATTATGAACTGATGGAATTAGCGATGTAGTATGAAGATATGGTCATATAGCACAGGTTTTCTGAACCTTCTGGGTCC  
 GGGGACCCCTTTTGTGATAGCAAATTCATTAAGGACCAGCTTATAATCATAACACAACCTCGCGGTGCGATAAAAAATGGCA  
 TAAAAGGAGACGTTTTACTGTGCTGTCTGCAGTGCATGGCTGGCCGAACCAAGTCTCGGCCCCAGGGAAAGAACATTTAA  
 ATAGCCCGCTCTTGGCATCGAAGATATATTTTTTCCGTTTTTCAAGCGAATTTTCATGCAATTCATTTTTTTTTATATCAT  
 AGGCAGAGAGAAAACCTTTCAGTTTTTAAAGATTACATTAAGAACAATTCATGTTCAAACAAAGAAGTATTGAGTTGAAA  
 AATGAATAATTGGTGGATATCCCTGTGAGCCTCCCAGGCTTGTATGCCCATGGTTAGTAAGAACCTACATTTGTAGATTAA  
 TAATAATGACATTTTATTGATTAGACCCTCTAAACGAATCCCTTGGCCAAAATGTGTTTCATCAGTTATTGTAACAATA  
 TTCATTAAAAAAAGTTATTATTTTATTTTATACATATTTAGAGATCTGGGCACGGCAGTACCTCTTCCGCAGACCCCAT  
 TTGGGAACCTCTGGTGTAGCAGACCCTTTCATCCAATCCTTTTATCTACATTTTAGGCTATGGTTACAAATCGTAATAAT  
 AATCCAACCTCTGATTGGGGAGTTATTTACTGCGTAATGGACCAGTCTTAGATGAGTCTGTCCACTTCTTTCATTGAGCAT  
 TGTGTTTATGCGCGAAATGTGGACAACATGTGAAGAAGTCACATTGCATTTTCAGTGTCTTGAATTCAACTGATGCGGAC  
 GTAACAGCTTGCAAACATAAAACAAGTTAACATCAACCATCTGACGACGGGCATGTTCTGGCATGTCCTCCACCGTTCGAGT  
 TACCCTGACTGACCCCTCTCCCTCTCTCTGTCCCTCTCCCTTGTCTCTCTCTCTCCCCAGATGCGAGGTGTGCCGTCC  
 CCCCTCCTATCGCCCTTACGCCCTTCCCTTGGCCGCTCCCTCTACGACCGCCCGACTGGAACCCCGTCTCTGTGTG  
 ATCTCCGGAAATCAGCTCTACATGTTGGACCAGGAGGACTTACTACTGCTGCACACACTATAGAAATACAATCCC  
 ACCCATCACCCACCATTTGACTTGAAGGGGAATACCGTCTAGGAGTAATATTTCTATCTATTCTATGGCTCACATTCG  
 TGTATCATACTGTATTGACTGGGTGTTTGTACATGGCATGAGTGTCTACAACACTGTCTGACAGTTTTCTAAAGCCACA  
 AAGTTAATAAAGAATGACATATCCAAAAAGGATATCACCACAATTCACCTTTAGGCGTGAACCTTTATTGACAGANN  
 NNNNNNNNNNNNNNNNNNNNNNNNNNNNNNNNNNNNNNNNNNNNNNNNNNNNNNNNNNNNNNNNNNNNNNNNNNNNNNN  
 NNNNNNNNNNNNNNNNNNNNNNNNNNNNNNNNNNNNNNNNNNNNNNNNNNNNNNNNNNNNNNNNNNNNNNNNNNNNN  
 NNNNNNNNNNNNNNNNNNNNNNNNNNNNNNNNNNNNNNNNNNNNNNNNNNNNNNNNNNNNNNNNNNNNNNNNNNNNN  
 GTCGCTGGTTTTGAATCCCCGAGCCATAAAATACATATTTTGGTTGAATGCATTCCGTTGTGCAACTGACTAGGTATCCC  
 CTTTCCCCTCTGAGTGTGATCTAGGATCAGTATATATTTTAGATCATAACAGACATAACACGATTACATGACCAGGTGG  
 GACCAGATTCTAGATCAGCACTCTACTCTGAGACACTTTAGGAATACGGGACTTTTTCAACCTGACTGTTTATTGCTAA  
 TTAATAATATATATATATATACCTTAGATTACTTACTATATCATACTAAGTAGAGATTAGCCTGCTAGCTAAGACCAGA  
 AGGGGCTACTATTTCCCTCACTTTTTGTACTGTATCGCTTGGACAGGTCTCTTTTTAAATATAGACCTTGACAGACAGAT  
 TTACAGATTTATATCCAATAAAATGAATCCATAAACAACATAAACACATAGAGGTTTTACTTACACACTTAAAGTCTAT  
 TACACTACAATAACAGTGTTCATAGTACATTTGATTGAGATGAGTCTATTAAGATGATGTAATGATGTAATGGAGT  
 ACTCTAGGGGACTTGCAGGGTAGCTAGCTGCCAATATCTTTAATTCCTGCTCTCTCAGAAGGAGGATAAAGAACCTTATG  
 ATCCAGATAAGGGCTTTTCAGCTCTGGAGTAATGAGAAGAAGGCCAGGTCAATTAATCAAAGGCTTATCCCTGTCTAA  
 TTGAGGACAGAAGCTATGAATGGTTTGGACAGACCTGACGTGCCGATAGCCACCACATCGGAGAGAGGATGAGAGGGCAT  
 TAAATATTTCATGCCTGTCACCTCCTGTCGCGGTGCGCGCTCTCTCTCTCTCTCTCTCTCTCTCTCTCTCTCTCTCT  
 CTCTCTCACTCACTGCACCTCGTGCGGTGCGTGCCTCTCTCTCTCTCTCACTCTCTCTCTCTCTCTCTCTCTCTCTCTCT  
 TCGTCTCTCTCTCTCTCTCTCTCTCATCCCCAGTTGCCGAATGGGTGTCCATCGGGTGTGATGCATGTCTAAAAA  
 ATGCTTACTACTCTTGTAGTCACTCTTCCCTCGTGCCTGCGCGCTCTCTCTGCTGCTGCATCTACTCTCTCTCTACT  
 TACTCACTCACCTCGTGCGGTGCGCGCTCTCTCTCTCTCTCTCTCTCTCTCTCTCTCTCTCTCTCTCTCTCTCTCTCTCT  
 CGGTGCGCGCTCTCTCTTCTCTCTCACTCACCTCGTGCGGTGCGCGCTCTCTCTCTCTCTCTCTCTCTCTCTCTCTCTCTCT  
 TCTCTCTCTCTCTCTCTCTCTCTCTCTCTCTCTCTCTCTCTCTCTCTCTCTCTCTCTCTCTCTCTCTCTCTCTCTCTCTCT  
 ACAGTAGTCTTTGGCTATCCACAGACGTGCTCTCTCTCTCTCTCTCTCTCTCTCTCTCTCTCTCTCTCTCTCTCTCTCTCTCT  
 TGAATGACATCTGTCAAAGACCCCTTTCTCTTCAATGCGACTTCTCAGTCTCAACTAAGGGGCTGCTTGGGGAATAA  
 CAGTCTCTGGAGGAATATGTGAAAATATCTCANNNNNNNNNNNNNNNNNNNNNNNNNNNNNNNNNNNNNNNNNNNNNNNNN  
 NNNNNNNNNNNNNNNNNNNNNNNNNNNNNNNNNNNNNNNNNNNNNNNNNNNNNNNNNNNNNNNNNNNNNNNNNNNNN  
 NNNNNNNNNNNNNNNNNNNNNNNNNNNNNNNNNNNNNNNNNNNNNNNNNNNNNNNNNNNNNNNNNNNNNNNNNNNNN  
 NNNNNNNNNNNNNNNNNNNNNNNNNNNNNNNNNNNNNNNNNNNNNNNNNNNNNNNNNNNNNNNNNNNNNNNNNNNNN  
 AGGCATCGCTCTCCCTCCACTGTGCCAGTGTATGCAAGCAATCAGAGGCACGTGTTTCCCTGCTAGCACAGCGCTAG  
 CACTAGCATGTTAGTATCCTCTCTCACTACTACTGAATCAAATTAGCATTAGCCTGCTAGGCTAATTCAAAAAAGGGGA  
 ATTAGAACAGGATTTGTTTTCAGTATCAATGCATGGCCATTTGTGTTGCATTTCCCTGCCCATATGTTTGAATGGCTTTGGC  
 AGTGTGATACGTAAATTAATTCATTAGCGCCCAAGCCAACAATCAGCAGCGCCGTGGTGGCTTTGGCTGTAGCTACTGTT  
 GTCACATTCATAAAGCATGACTCAGGAGTAGTTAGCTTTTTACACATGCATTACCTTGGGAACCCATTTGAAACAG  
 GGGGATGTTGCAATTTATGTAATAATAAGGCACACATGGATGGAAGGAGTCAATGAGGAAGAAGCTCCTTCAATTTGACAAA  
 TAAGAAGGCTTAATGCACTATACATTGGCAAATGTAATGTTATTTAACAAGCGCTTTACTGCCTTTTGGCATCTGAATA  
 ACCATTACGAGCAACTGAAGTAAGCCATTTTCTAAAGTACACCCGTATACATATTAGGGTTATACACTGAGTGTACAAA  
 ACATTAGGAACACCTTCATAATATTGAGTTTACCCTTCTTTTGCCCTCAGAACAGCTTCAATTCATCAGGCATAGACT  
 TTATAAAGTGTGAAAGCGTTCACAGGGATGCTGGCCATGTTGTTGCCAATGCTTCCCAAAGTGTGTGACGATGGCT  
 GTATGCTTTTGGGTGGTGGACCATTCTGATACACACAAGAACTATGAGCCTGAAAAACCCAGAGCGTGTGACGTTT  
 TTGACACACTCAAACCGGTGTCCTGACCACTACTATAAACCCTTCAAAGGCACAATCTGTTGTCTTGTCCATTCA  
 CCCTCTGAATGGTACACATACACAATCCATGTCTTAATTCCTTCTTTAAAGTGTCTCTCCCTTCACTACACTGATTG  
 AAGTGGATTTAACAAGTACATCAATAAGGGATCATAGGTTTCACTGGATTACCTGGTGTGAGTCTATATANNNNNNNNN  
 NNNNNNNNNNNNNNNNNNNNNNNNNNNNNNNNNNNNNNNNNNNNNNNNNNNNNNNNNNNNNNNNNNNNNNNNNNNNN  
 NNNNNNNNNNNNNNNNNNNNNNNNNNNNNNNNNNNNNNNNNNNNNNNNNNNNNNNNNNNNNNNNNNNNNNNNNNNNN  
 NNNNNNNNNNNNNNNNNNNNNNNNNNNNNNNNNNNNNNNNNNNNNNNNNNNNNNNNNNNNNNNNNNNNNNNNNNNNN  
 ATCTGTCACTGATAGGATGTTATGAGAGACTTGGAGACAGCAGTGGTGTGGCCAGCCTAACCAATTTCCACTTCTC  
 AGGACACAGAGCTAGTGTGTCGTTGTGTTTGTATGCGTGTGTAATGCGTCTGTGTGTGTCGCTGTGTCGGGGCA  
 GAGGTAGTGGACTACCGCTGTTTTGATCACGACTCCGTTACAAAGTAAATGGATTACACCTGCCGCTCCATTAACCCCC  
 CCCCCAGACACACACCACCATAATCCCCACCCAGCTACCCATCACAGCTGGGCCAGTGTGACATATGGTCCAGG  
 CAGCTGCAGCATGCTCAACTCTCAAAGCCAGGCCCCCTCTCTCTCCCTCTCACTCAGATCTATGGCTTTCATTCTCC  
 CTCTACTCACCCACACCACCATCCACCCTCCTTCAGTGCCTGACACAGTCACTGTCTATTTTCACTCTTAGCCAC  
 TTCTGCTCTACTCTTACTCTGACTACAGTTTGTGGATGCCGAAATCCAGTACAATGACCTTCTTGTAGCTATTAG  
 AATGACCTTATGAATGAGCTTATCTCTGACAACACTCAAGGGAGCCAAGGTCTGCATGCCAGTATTCAATCTACTTTTCA

ATTGACTGAAATGGATTGTTGACTCGCCATACAAAAACCAGAATACCCAGAGACAGAACTCCAGGACGGAAATTGGGA  
 AACACTGCTATACGTTACAATTACAGACGTTTTATAGACAATTAGCATGCTTTCTTGTCTCCCTGCAGGTTTCAATGCT  
 AGCCACTGCCCTGTGTGAGTGTCACTGCGGGCCCCATGCCCCCTGTCTGGTCTGCCAGTGTGTGTGCCAACCTGC  
 CTTGTGTGCCCGCTCATGAGCATGCCCTACCAGGGACCGTGCCAAAGGCGGTGTGAGGTCGCCAGCTGCAGGCCACTGTCC  
 TAACCAGCTCCCTCTGGAGACAGATGGCTCATATTTAACAATGTTAGAGAGTATATCTGTGTTAGAAGGATATTCCTAG  
 AGTGTATGGTCCAATAATGAAGTAAATAGATTATATGAGAAATAACAAAAATAATGGGAATGTTATAAACAGATGT  
 TAAAAATTTGGTCTGACGCATTTAACAGTGTGCTCGCAGTGTATCATAAAAAATATATAAACAGCAAAGCAAAGTCTTTCC  
 GTCCATATAAATTGCTCAAATAAAAGGGCAGGCGATAAAGAAACAAGCTTTTATGCATGCGGGTGTGGACTCATAAAGAT  
 TGGGTGTCTTATAATACATTTTTTCATTCAGGAACCTATCCGTAAC TAGCAATATATCTGTCTGAGCGTAAGATGCATC  
 TCACAACATACTATTAGTAGTGCAC TAAGTGGAAAAACGAGCATAATCAAATACACACTTGATTTATGGTGTGTGTATC  
 CCTGATTACCCTTTAAAAAAGAGGTAAACGTCAACAAAACGAATCCTGCCACCGATAGCGCTGGGAGATGCTTCCGGTT  
 ACTGGGCTATGGGGAATTGTATGGAGTGTCTGTGCTCTGTGCTGTGCATCCACTAGATATGTCTAGCGCAGTAGACTGCAT  
 GTTATGTATGTTGGGGGGTGGGGGGTGGGTACTGTGCCTGCAGTGGGTGTATGTATGTATTACACTTTTATGTATC  
 CATATGTGTGCTGGAAGCCCTGCTACATGTCTATAATTTACAGCTGGT CATACGGTTAAACGTGGT CATGTAACCAGCCGG  
 TGACCATCACACACATACAGTACCAGTCAAAAAGTTTGGACACACCTACTCATTCCAGGGTTTTTCTTTATTTGTACTATT  
 TTCTACATTTGTAGAATAATAGTGAAAAAAAACATGAAATAACACAAAATGGAATCATGTAGTAACAAAAAAGTGTTC  
 ATCAAAAATATTTTATATTTGAGATTCTTCAAAGTAGCCACCTTTGCCCTTGACAGCTTTGCACGCTCTTGGCATTG  
 TCAACCAGCTTTCAGAGGTAGTCACTGGAATGCATTTCAATTAATAGTGTGCTTTTGTAAAAGTTAATTTGTGGATTT  
 TCTTTCTTCTTAATGCGTTTGGAGACAATCAGTTGTGACAAGGTAGGGGTGGTATACAGAAGATAGCCCTATTTTGTATG  
 GGAAGAACAAC TCAAATAAGCAAAGAGAAATGACAGTCCATCATTACATTAAGACATGAAGGACAGTCTATCCGGAAAA  
 GTAAGAACTTTGAAAGTTTCTTCAAGTGCAGTCTGTA AAAACCATCAAGCGCAATGATGAAACTGGCTCTCATGAGGACCG  
 CCACAGGAAAGGAAGACCCAGAGTTACCTCTGCTGACAGGATTAGTTT CATTAGAGTTAAATGCACCTCAGATTGCAGCC  
 CAAATAAATGCTTCACAGAGTTCAAGTAGCAGACACATCTCAACATCAACTGTTTCAGAGGAGACTGCGTGAATCAAGCC  
 TCATGGTCTGAATTCGACACACACACAAAATTCCTATATTAAGCAAACAGACAGCAAATGTTCTTGTTTTTTACG  
 TTTACAGATAGCCAGGGGCACACTCCAACACTCAGACATAATTTACAAATGAAGAATGTGTGTTAGTGTAGTCCGCCAGA  
 TAAGATGCAGTAGGGATGACCAGGGATGTTCTCTTGATAAGTGTGTGAATGGACCATTTCCCTGTCTGCTAAGCATTCA  
 AATGTAACGAGTGTCTTTGGGTGTGAGGAAAATGTATGGAGTAAAAATAAATAAATTTCTCTTTAGGAATATAGTGAAG  
 TTAAAGTAGTCCAACTATAAATAGTAAAGTAAAGTAGAGATACCCAAAAAATACTTAAAGTAGTACACACACATCAG  
 TACTATAACCATGATAGCCATATCATATTTAGCTTATGTGTAAGTGGACTCAATTTGTTTGGAAATCTTTAGTTGGCATT  
 GTATTTCAACTAGCATTAGCATAGGTGATTTGATTTCTGTTGAAATGTAGAAGTTAAATGGTGTGAGTGTGGCCGA  
 GCTCTGTTTTTCTTTGCGACTTGCGGTAACCTCTCTGTGGTCTAAATCATTTCATTTCCATTTTAGTCAATTTAGCAGAC  
 GCTCTTATCCAGAGCGACTTACAGTAGTGAATACATACATTTTCTCCATTTCAAACATTTTATACATTTTTTCTCCGTAA  
 ATCAATAGTTGTTTAGTGGTCCAAAAATGTCAGAAACATTAAGTCTTGACCATGCTGTAGGTGATGTAAGTGTGTTA  
 CATGCAAAATGCTTTGTGGACTATACTGGACAGGGGTGCTCTCTGTTTGTGATGAAACAATGGTGTGGTGAATTTA  
 TTCAATTTATTCAACCACCTGTGTCTTCTATTTTTTTCAGCTTTAGGCCTATATATCACGGTGTCAAGGCATATGAAC TAA  
 CAGGTATACAGCAAAACATGTAATTTATCACACACATACCAGTAGGTTGTAATATGGCGATTTTTTCTGGCTTGGCTT  
 CCCAGTTATTTTTGCCACGACCCTACTGCTGATGATATCATTTCAAGATAGTATCCATTTAGTGTCTTCAGAAAA  
 TATAGCCTAATGCATTGTGCGTATTGACCTGACCTTGTCTCTCTGTGCATATGCAGGTACACCCTTTGTTGATGCGCGAG  
 CGGCGCTCCGAGTTGCACAGGAACAAGCTGCTGCGGAGGACAGTCAAGCTTCTGTTGAGGGGAGGCACCATCCAGAGAT  
 GGGTAGTAGGCCATGGGCCCTTCTATCTCTCTGAATCTTTTCGGATAGAAATACAGTCAATAGAAATGGCCTTGGAACT  
 CTGACCTTAAAACACAAATTTAATGTTGTACTTCTCTGCTATTACTTCTGCTTTACTCTTATGGGGACCTCGCAATGGT  
 TGCCAGTCCACCATTATGGCGTCAATGACTTGAATGGGGAGGCCGTTCTACTCATTCTAGTCTGTGTTCTGACTCT  
 ACCTTCTCTGCCTCTACTTCTTATATTTTGTGATCTGTCTTCTTACTGCCTCTCTGACTCGTGTCTCTGCCTCG  
 TTCCCTCACTCCACATCTCTACTCTGCTCTGTAACAAGTATTTGATGCAAGCAAGTGAAGTGAATGGATGGATAGAGGCA  
 ACTCTCCCCACAACAGTCTTGTGGGGATACTGCAATAGGCCACTCCCTCCATATTTGACATGAACTGTCCAGGTCTACTG  
 ACTCCAGAAGAGTGTGGTGCATCACACTTAAGCATGTCTATGGTATAACATATGTTAGCCAACAGCCTTCCATTGAGAA  
 CCATCTGCAGTGAGAGCCCATCCATCCTGAGGAGATGCCATACTGAATGGGATGGATGCCCCCAGGCGGCCAAGGCC  
 CCCAGGCAGCCATTAATGAGCTGATTAACAGAAATCTGTGCATGCTGCATCAGAAATCCACATTTACGGAGTCAAGTGT  
 AAGGGAACCTGCTTGTGACACACTGACCCATTTCCAGAAAGCTGTGACCTACTGCATAACTTGAACATGAGATAAGTTAGT  
 GAGATCATCATTTGGGATAATCCCAGAGTGAGAGTAGATTTGGATGCAAGCAAGTGAAGTGAATGGATGGATAGAGGATAG  
 ATTTGGATACAAGCAAGTGAAGTAGATTTGGATACAAGCAAGTGAAGTAGATTTGGATACAAGTGGATTGGATGGGATAGTGA  
 ATCTGTGTATAAAAAAAATCTTTGAAAAATCCAATTTTGACAAGACTTCAAAAAAGAAAAATAGGACACAAAGGTATGGAA  
 TCAAAATGACAGGCTAACTGTCCAATGATATGCAAGATGGAGATAGAGTATTGTTTGTCTATGGGGGATGAGGTCCAATA  
 GACCTCCGATGTTGTCTCTACTCACTTAAGTGTTCATTTCCAGGGACACATACAGTACAAGTCATAGATTACTCTTGT  
 GTTACAAAAAACAAGATTGAATTTGTATGCATCAAAATGTGTTTATGTACTGTCTCTATACTTCAAACGAATTTTCAATTT  
 ATCATCGTTTTGATAAATGAAGACACTTGACAACAATCCCACTGGTCTGATGTAATGGCCATCTCTGATGAAGACAT  
 TTGGCTCTGCATCTATGATTAGGGACGCATAGGATATTTCAACTCGCTCTTTGGATTGGATACGAAAGTTACTCAGACG  
 CAATTAGTCTACTTCCCCATCCACTTCCCTTCTATTGACACTTGAAAGCACGGAAATGGTTAAAGTTGGAGCAATCAACAT  
 GCAATTAAGGCATTCACTTTGGTAGATAAATGCAGTGTGCTGTAATGTTTATGCAAAATATCTATTGTAATTAGAACTT  
 CAACCTAAACCCATCCACAGAACTTCCAACCCAAAATGTTTGTCTGTGCGGAGCTGTCCAAGGTACTGAAACAGCTAC  
 CAATCTTAGTGGATTTTAGCCCATGTTGGGCCCTCTGTCCATGGTGTCAAACACCCTATGTACCCTGGACACATTTAGG  
 TACATATAAGGTACAGTAGTTACAATAAGGAGACAAGGCCCTCCCGAGGGGCGCAGCAATCAAGGCACCTGTATCGCAGT  
 GCTGAGGTGCCACTACAGCTGGGGTTCAAGCAGCAGCTGTGGCGGGTCAATTTTTTGAAGGATGCATGCTTTGACATTC  
 GCCTGTCCCAGGCCGTTGGGGAGTTGCAGTGTGAGACAAAGATCGGAACTACCAATTTGGGGAGAAAAAATAAGGTA  
 AAAAAATGAATTATGAAGAAAAAATGAATAGGGAGACAGATTGTGTGGGCAGTAGTACCAATAGTGGAGTATAGGGA  
 ATCTGGCTTGAATAGCAGTTGCTGCATATGGT TAGAGTACTGTATCTATGCTATGTTGAATGTTGCAATTACAGTAGC  
 ATGCATAATGAAACTATAAACACTTAGAGTAAAAAGTGGTAGTATGTTGTGACTGCTGCAAAATGTTAGATGCCACG  
 TTTCTGAGTCATTCAGCCATAAAGGGAAGTTATTGAAACTGTGTAGCTGGGGTGTGTTCTGTAATGTAGGGCGTTGTGT  
 ATTTACTGGCAGGGTAAGTTACATTTGTGTTTACTTGTCAATTTGGGCAGCTCAAAGACAGGTCTGACCTACCACAAA







CAAACAAGGAGAGGGACCAGCTTCGGCGGAAGTCGTGACACACACATGTACTTGATTGGTGGACTTTGCAGAGAGTAGGG  
CAGAGAAGCCTTTATTTCTGGCCTTGCCACTGCAGGCTCCATCAGTGGAAATGGCCATTGCACTTGGTGATGTCAAGCTTC  
ATGTTTTCCAGTACTTACTCAGTACCTGGACAAAGTATTGTCAGTGGATGCCTCACAATTTCCACCAGCAACAAGTTA  
CTCATGGATGACGTACGTACATATCTGACTATGACAGAGCATTGATCTTGTGTTGTAAATGTCTCGGTAGTGTCAATCT  
GGACTGAAAACATGCCAGCTTGGTGGCCTGCATTGTGTGTTGGATGGTGTAAATGACATATATCGATGGTAGTCTTTTGATA  
ATAGAGTGATTAGAGAGCCTCTGCCCCCTCTTGACCCAGACTCATGCAGTGGTGTGCTTTCTCTATGCAGGCAGTGAGA  
TGCTCTTTCATACACAGGTGCTACTTTCCAGTAGAATGATAATCTCTAAAAAGTTGGCATGGTCAATGCTGCTGTCAATC  
TAGCGTATAAGCTGCTTCAGACTGCAGGCCTCTGTAGCTCAGATCCTTCTTGCCATGACTTTAACAACATCTATAATGC  
GCTCTAACACTTGCCTTCTTCTGTTCACTTGCTCTCTATGAGCAGACATCTGACTGCCGATGAACAGGGTCTCAATGCTA  
CCTTGGAGGACTTAGAAAGTAGGCCTCAGCACTAATCTATGCATAATGCTCTTCTCATGCTCTCCCCTCTCTGATG  
GATATGCTTCGCTCAGACTTTCATTTCATGAAAGGGCTGTCTCTGTTGGCTTTTACAAAATGCCTTACAAAATTAAGCAGAA  
AAAGCATGGTTCACTTCACTGTCTGACGGCCACTTCCCTTTGGTCCCATCTTTACAGAAGAAAACCTTCTGCACCACAGA  
CTTTTCACTTTTTGTTGGGGATGGAACTAAAAACATATCTAGGTCCCCTGACGTCGGCCTCTTAAAAATAATCCCAA  
CTGGGGTGGCAGTGCATCCTGGCTGTGCCACTGCAGATGCCTATCCTCAACCTGGATGAGTAATGATATAAAATTAG  
TATAATAGTATAAATATATAACATTAAATAAAAAGTATGATGTTAATAATAATAGTATAATGTTAGTATAATATAATATA  
TTAATATATAAATGTTAGTAGATTCATATAATTTATATAAATAGTATACTATATAGCACTAGTGAATAATAATTCCAAT  
TGGCAACTACTGCAGTTAAGAAAATACACAACCAATATTTATAAATTTTTGTAGGTTTTGTCCATATAAATCTTG  
CAATAAAAATGGTCTACATTTGGTGGTTAGTCTCTAATTTGTAAATGCTAAGACTAATGTCAATAATCAAAACA  
ATGAGTTCAACATTTTGAAAGTTTTGTGAGCGCGTCAACCTTTTTTTACTGTCCCGCCCATCCAGGCTGTGATTGGTT  
GGTTACAGAAAAGTGCATTTGACGAGCGCTTGTTCACAAAAGGCACCTGATATAGCTAAATAGCCAGCTAGCCAAACC  
CAAACATTCTTTATCTTATCCCTATGTCTTCTGCCTACCCTTCAGCTACAAAACCTTGACTAACAGTTGAATGGGT  
TCGCTGGGCTCAATGGGCTGCTCTCTCCTCTCCTGTCGCTGACGAGTCCCTCAGGCTCCTAGGCTGAGATGATTGACTGGT  
AATGGCGCAAATTAATAATTTGTTATTTTAAACACTTTGGCTGCATCAGCCTCAAGGACTTCAACCTCTCTCTCCTC  
GCTTTTTCAGCAACCACTTTACATTTTCTCTTTTTTGTGTTCCATCTGCTCCACTGCCTATTTTCAAAATGTCACC  
ACTTAAACAGAGATGGGAAAAGGGCCAGGACTGGACAAAAGTAATTGGCTGGGAGAGCGAGGCTGACAGATGTAATACC  
CAACCGCAGTGTGAGTGGCCGGCAGCCCACTCGCTGGGCGAGTGCAGACACAGTACTGGTTATTTTATTTAAGCG  
GGGCTGGGGTTATTTATATTTTGCCTGTCATCGGCCCAATTTGCAAGCGGAAAATTCGGCTTGACAAATGCTCCAGATG  
GCCAGTCCGTCATTGCGTGTGATGCTATATAGTATCAGAAAAGAGCAGATTCTGCAGTTTCCAAATGACCTATCCTCGC  
CAAACAACCTTAAAAATGACCCATTGAGCTGTTTTGAAAATAACAATTTTTGGCAGAATTAAGTGTACTGTCAACA  
CTCAAGCTTTATAATTTCAACTCAAAGATGCCTCTGTTTTTATGATTTTCTTAAATTCATAATGTTCTTTAAG  
ACCTCCAGGGGACCTAGACACAAGTCCCCAAGAAGCTTTATAAATGCTTGGGGACACCAGGAACACAAAATCCTC  
CAGGGGACCTGACACAATGACTAAGAAGCTTCAGGGGAACCTTCAGGGGTCAAATCTGGAGCTATAACAAGGTCCCCCA  
GAGAAGCTTACCTTGGGGCCATTGCACAACGTCTAAGGACTAGTAAAAAGAAAGTTATGAGCAGTCTGAGAAAGGTCC  
TGAGTGACGTCCTGGGAACTAGACAAAAGGTAACCCAAAAGAACGTTCCCTTGGGATCATCAGCAACATCTAAGAAGGTC  
AATGGGATAACATTGCGCTGAGACCCTTAGGGACCTAATAGGAATGTCACCGAATGTCCTCAGGTCATCTCCTGTTTGC  
TGGGATATAGACTAGAACAGTGGTCACCAACCTTTCTTGTGAGATCACTTTCTGAGTCAAATGCAAGCCGAGTGCA  
ATTTCTGTCTGGGCAGGGGACATCAAGTACGATATAAATGTAGGCTTTTTGTTGTGATGCAAAATGAAATTTATAGCT  
ACAGTGAATGGGAAAATAAGTACAGGGCAAAGTTATATTTCCCAATGAAATGAACTCCTAAAAATGATTATTTTCATGCAT  
TTGGCTATTTTTCATATATAGTAAGAGAAGTCTGATTTTTCTCCATGTAGGCTTTTATATTTCAAACTCGAGTCTCAAGCT  
AAGTCAAGTGGGCAGCCGTCATTCAGGGCAGGTGGGGGACAGCCCTGTTTTGAGCCCACCTGTTTGTGTTTTAATAATA  
TGTTTTGCATGTTATCTTGGCATTAAATACGTGTCACATATCAGTTTTACATACAATGTAAAAACAATCCAGTGGATAAAG  
CCGCATATAAAACATGGTCTCTTTTTTGCATTCTTGAGTAAGGCAGCTCCAAAATGCAGGTGTTTTCAGCCTAGCTCAGTGC  
TTTCTGTGGAGGACAGCCAGTGGAAAATACAGAGTTTAGGGTGGTAATCTTCTCTAGTTGCGCCGTGATTTGGCTCAG  
TGTCTGTCACTCATGGGACATGTGTCATCTCAAATGTCAGGGGAGACTAGAAAATTCAAGCCCTTGGGTCGGG  
CCATAGATTTACATTAGAAGTGCCTCCAAAGAGGTCAAGGTCATTGGCCACAGATAAAAATGACATCAATCCTTTTTCA  
ATCCTTGTCTCATATGAAGAGAAATATAGATAAAAATGTATCGGTGCTCATCGGCCATTGGACATAAACAATGACACAACA  
AGTTGAAATCACAATCAACAATGAGTGGTTTGGAAAGGAATCAGTGGCTGACTGCAAGCATTGCAAAGCAGTCACTAT  
TTTTGCTTCCCCTGCTGCTATTTCGGTGGAGAGGGTGTGTGGTCCAAGTCTGGGTAAAGGGTCTCTTTTTCAAGCTTAA  
AGGATAAACATTCACACACAACCACTGGGCCCCAAAAGGTTGAATACTCTGGCCATGCTGTCAACCCAGCAGTACTTCT  
GCCGTGTTCAAACAACTTGAATTTGAACGTTTTGAACGTTTATCCAATACGGAATTTCAAGTCCGGGACCTCGGCTCT  
TTCTAGAGCGCCGAAGTGAAGGTCACTGATGTCATGCTGTTTATAGAGAAATGTCATCAGAAATTTGTAAGAGCTTTC  
ATGTTCTGCTTATTCAGTATCCCCCTTTATTTATCCTATGGTTGTGACATGGTGTTCAGGGAGAATACTGTAAGAATGG  
CCCATGTTTTGAATCTGTTGCTGTACATTTCAAAAAGTTTTGATATACAGTTATATTGACAATGTCCGCTTAGCTGGCT  
CGTTAATGTTGTAATCAAAATATGGATTGCCTTTTTATCCGCACATCGTTCCCTTATGCTATGGTTGTACATCTCAATT  
GTCAGTGGATCCCAATTGTTAAGCAAGTCAAGCCATATCCCAGCTATGTTTTTTTTTTTTATGCAGTAAATGAGGTTGAA  
TGAANNNNNNNNNNNNNNNNNNNNNNNNNNNNNNNNNNNNNNNNNNNNNNNNNNNNNNNNNNNNNNNNNNNNNNNNNNNNNN  
NNNNNNNNNNNNNNNNNNNNNNNNNNNNNNNNNNNNNNNNNNNNNNNNNNNNNNNNNNNNNNNNNNNNNNNNNNNNNNNNNN  
NNNNNNNNNNNNNNNNNNNNNNNNNNNNNNNNNNNNNNNNNNNNNNNNNNNNNNNNNNNNNNNNNNNNNNNNNNNNNNNNNN





CTCTAGGAGACAGAAATGCGTCTCCTCCTGAGCGGTATGACAGCTGCATGGTCCCATGGTGTTTTACTTTCGGTACTATT  
GTTTGTACAGATGAACGAGGTACCTTCAGGCGTTTGGAAAATTGCTCCCAAGGATGAACCAGACTTGTGGAGGTCTACAAT  
TGGCTTGGCTGATTTCTTTGATTTTCCTATGATGTAAAGCAAGAGGCACTGAGGTTGAAGGTAGGCCCTTGAATAACAT  
CCACAGTTACACTTCAATGACTCAAAATTATGCTAATTAGCCTATAGAACGTTCTAAGGCATGACATCAATTTCTCG  
AATTTTCCAAGCTGTTTAAAGGCACAGTCAACTTAGTGATGTAAACTTCTGACCTACTGGAATTGTGATACAGTGAATT  
ATAAGTGAATAATCTGCTGTTAAACAATTGTTGGAGAAAATGACTTGTGTGATACACACAGTAGATGCTTAACCGACT  
TGCCAAAACATAGTTTGTAAACAAGAAATTTGTGGAGTGGTTTAAAAACGAGTTTAAATGACTCCAACCTATGTGTATG  
TAACTTCCGACTTCAACTGTATATATATACACATAAACATTCATACATATACACGTACACTACTGTTCAAAGTTTGTG  
GTCCTTTGGAATGTCTTGTTTTTGAAAGAAAAGCAAATGTTTGTCCATTAAAATAACGTCAAATTGATCAGAAATTA  
ATGTTGTAAGTGACTATTGAAATTAGAAACGGCTGATTTTTTATGGAATATCTACATACAGTGAGGGAAAAGGTAATTTG  
ATCCCTGCTGATTTGTACGTTTGCCCACTGACAAAAGAAATGACCAGTCTATAATTTTAATGGTAGTTTATTTGAACA  
GTGAGAGACAGAAATAACAACAAAAAAATCCAGAAAAACGCATGTCAAAAATGCTAGAAAATTGATTTGCATTTTAATGAGG  
GAAATACGTTTTTGTACCCCTCTCAATCAGAAAGATTTCTGGCTCCCAGGTGTCTTTTATACAGGTAACGAGCTGATATC  
AGAACAACATGAGGAGAGAAAGGGCTCCTCCAGTCTAGAGTTGACTGAGCAGAGTTACTGTAGTGTGTGTGTGTGCTGC  
TCTAATGATAATGATGTTTTCTCTGTGGAAGTTAGAAAAGTCAAGTGAACCATTGTACTGCTGTCTCCTATCTCCTGGCT  
GTTCTTCCCTCACGTCTACTCATTCTCTCTTTTTCAGACTGTATTGTGGACCCACCTCTCTGTCTTCTCTCTCTCT  
TCCCTCTCTCTCTCTCTCTCTCTCTCTCTCTCTTTTTCTCTATCTGTAGATCTCTCTCTCTGAGGTTAGGAGGATTTG  
GTATACACTCCTCTGTGTGGCGCGGTATATCTCTCTCCACAAAGATATATACAACGTGTGTGTTATATGTGTGTGTG  
TGTGTACACGGTTTTCTCTGTGTGTGTGTGTGGCTGCCCTCGGCTGCTGCTGCTGCGATTGAGGTAGAAAATGTGAGG  
ATAATGAGGGTGGGGCCATAAAAACGACAAATGGAAAGACAGCCAAAATAAGCACAAAACGAGCACAAAATAAGAATTAA  
GCGGAAAACAGGAAACAGTGGGTATGGTTAGAAAATATGGCAACGGGAAAAGACGGGGGGAAGACAAGGAGAGACGGCAAC  
CAAGGAAAGCAGGCTAAAAGGGGGAATAGGAGAAGACGCAAAAAAATAAGAGAGCAANNNNNNNNNNNNNNNNNNNN  
NNNNNNNNNNNNNNNNNNNNNNNNNNNNNNNNNNNNNNNNNNNNNNNNNNNNNNNNNNNNNNNNNNNNNNNNNNNN  
TCCACATGGCCAAAGACAAAGAGCTTCCAAGGATGTCAGGACAAGATTGTAGACCTACACAAGGCTGGAATGGGCTA  
CAAGACCATCGCCAAAGCAGCTTGGTGAAGGATGACAAAGTGGTGGCATTATTCGCAAATGGAAGAAAACACAAAAGAA  
CTGTCAATCTCCCTCGGCTGGGCTCCATGCGAGATCTCACCTCGTGGAGTTGCAATGGTCAATGAGAACGGTGAAGGAA  
CAGACAGAACTACAGGGAGGATCTTGTCAATGATCTCAAGGCACTGGGACCATAGTCAAGAAAACAATTGGTAA  
CACACTACGCCGTGAAGAATGAAATCCTGACAGCGCCACAAGGTCCTCCCTGCTCAAGAAAAGCATATATACATGCCCGCC  
TGAAGTTTTCCAGTGAACATCTGAATGATTCAGAGGACAAGTGGGTGAAAGTGTGTGGTCAAGAGACAAAATGGG  
GCTTTTGGCACTCACTCAACTCACCATTGTTGGAGGAGGAGAAATGCTGCCTATGACCCCAAGGACCACTCCCAGGCT  
CAACATGGAGGTGAAGCAATTATGCTTGGGGTGTTTTTCTGCTAAGGGGACAGGACAACCTCACCCATCAAAGGGA  
CGATGGACGGGGCAATGTACCCTCAAGTCTTGGGTGAGAACCTCCTTCCCTCAGCCAGGGCATTGAAAATGGGTGCTGGA  
TGGGTATTCCAGCATGACAATGACCCAAAACACACGCGCAAGGCAACAAAAGGAGTGGCTCAAGAAGAAGCACATTAAGGA  
CCTGGAGTGGCATAGCCAGTCTCCAGACCTTAATCCCATAGAAAATCTGTGGAGGGAGCTGAAGGTTCCAGTTGCCAAAC  
GTCAGCCTCGAAACCTTAATGACTTGGAGAAGATCTGCAAAGAGGAGTGGGACAAAATCCCTCCTGAGATGTGTGCAAC  
CTGGTGGCAACTACAAGAAACCTGACCTCTGTGATTGCCAAACAGGGTTTTGGCCACCCTAAGTTAGTTTCCCTCAT  
TAAAAATGCCAAATCCATTCAAAATTTTTGACATGCTTTTTTCTGGAATTTTTTGTGTTTATTCCTGCTCACTATTC  
AATAAACCTACCATTAATAATATAGACTGATAATTTCTTTGTGAGTGGGCAAAACGTACAAAATCAGCAGGGGATCAAATA  
CTTTTTTCCCTCACTGTAGGGCTACAGAGGCCATTATCAGCAACCATCATTTCTGTGTTCCAATGGTACGTTGTGTTTG  
CTAATCCTAGTTTATCATTTCAAAAGGCTAATTGATCATTAGAAAACCTTCTGCAATTATGTTAGCACAGCTGAAAACCT  
GCTGTCTGATTAAGAAGCAGTAAAACGGGCCTTCTTTAGACTAGTTGAGTATCTGGAGCATCAGCATTTGTGGGTTCCG  
ATTACAGTCTCAAATGGCCAGAAACACAGAAATTTCTTCTGAAACTCATCAGTCTATTCTTGTCTGAGAAAATAAGGA  
TATTCATGCTGAAATTGCTAAGAAACTGAAGATCTGTAACAACGCTGTGTACTACTCCTTTCACAGAACCGGTAAC  
TGGCTCTAACCGAATGAGAAGAGGAGTGGGAGGCCCTGGTACACAACTGAGCAAGAGGACAAGTACATTAGATGTCTA  
GTTTGGAGAAACAGACACTCACAAGTCTCAACTGGCAGTTTATTAAATAGTACCCGCAACCCACCAGTCTCAACGTCA  
ACAGTGAAGAGGGACTCCGGGAACAGAGTTCCCTCTGTCCAGTGTCTGTGTTCTTTTGGCCATCTTAATCTTTTCATTAT  
ATTTGGCCAGTCTGAGATATTACTTTCTTTGCAACTCTGCCCTAGAAAGCCAGCATTCCGGAGTCCGGGATAATGGGCCCT  
GTACGCTTATGATGATTTCCATTAATAAATCTGCCGTTTCAGCTACAATAGTCAATTTCAACATTAACAATGTCCACAC  
TGTAATTTCTGATCAATTTGATGTTATTTAANNNNNNNNNNNNNNNNNNNNNNNNNNNNNNNNNNNNNNNNNNNNN  
NNNNNNNNNNNNNNNNNNNNNNNNNNNNNNNNNNNNNNNNNNNNNNNNNNNNNNNNNNNNNNNNNNNNNNNNNN  
TGGTGTAGCTAGATAGCTTGTCTAAAACAATTGACAAGCAACAAGCATCTTAAAGATTTATAAGAAGATATTGAGAAGTTT  
TAAAAAAGTTATAAAAATCTTAAGGTATTATTGAGGAATTGCACTTATTGACTTCTTTTTTTTTTTCTTAAAGAAGTTCTTA  
AGTTTTTTCGTGACTTGTTTTTGTGAATCTGGGCCCTGGTTGGTAAACCAACTCCAACCCCTGGGTTCTCTTCAA  
CCCCCTTCCACATCCACTCTGTCCCTTAACATGTACATTGTAAACCTGTGCCAGTGGCCCATTTGTGAAACATGGGT  
AAATATCTGCAATGTGACTGTACAAAACCTTATTTTTCTTAGCCTTTCGAGACTGATAGGAACAATTGCTCTGGAACA  
TCACATTAGGCTCAGCGTGCAGTTTGGTGTCTTGTGAAGATCTGGGATGAGGAAATAGACAGACAGGTGATGTGGGA  
TGGAACTGCTAGTCTTACGAGAAAACATGCTGAGGAACACTCAAGCCACTCCCCAAAGGACCATCTGGCTGTGACCTCG  
CATCATTTAGATTATCATGACAGATAACAGACATTTTTATGTCTTTAGGTATCTAGAGTCTGACCTGACAGGACTTTTAT  
CCTCCAGGACTAGCTTAGCAGTTTTCCCTCAAACCTAAAAGGTATAAAAAGTTCATCACAAAACCCAGAGTCTCAAAC  
AGTCTTAGTATAAAAATATGTAATAATCCACTCTGGCCGATGGATGGGTTTCACTGACCGAGTAGCTATTATTACGCAAG  
ATCCTGATCATTGTGAAGGGCATTATGTTTTCAATATCAATGAAAGTTCAAATGATTTGGAGGAAGTGTTTAGATCTGAT  
AGAAGTCCATAGGAAGCTGAAAACCGTAACCTGAAGCNSNNNNNNNNNNNNNNNNNNNNNNNNNNNNNNNNNNNNNN  
NNNNNNNNNNNNNNNNNNNNNNNNNNNNNNNNNNNNNNNNNNNNNNNNNNNNNNNNNNNNNNNNNNNNNNNNNN  
NNNNNNNNNNNNNNNNNNNNNNNNNNNNNNNNNNNNNNNNNNNNNNNNNNNNNNNNNNNNNNNNNNNNNNNNNN  
NNNNNNNNNNNNNNNNNNNNNNNNNNNNNNNNNNNNNNNNNNNNNNNNNNNNNNNNNNNNNNNNNNNNNNNNNN  
NNNNNNNNNNNNNNNNNNNNNNNNNNNNNNNNNNNNNNNNNNNNNNNNNNNNNNNNNNNNNNNNNNNNNNNNNN  
NNNNNNNNNNNNNNNNNNNNNNNNNNNNNNNNNNNNNNNNNNNNNNNNNNNNNNNNNNNNNNNNNNNNNNNNNN  
NNNNNNNNNNNNNNNNNNNNNNNNNNNNNNNNNNNNNNNNNNNNNNNNNNNNNNNNNNNNNNNNNNNNNNNNNN  
NNNNNNNNNNNNNNNNNNNNNNNNNNNNNNNNNNNNNNNNNNNNNNNNNNNNNNNNNNNNNNNNNNNNNNNNNN  
NNNNNNNNNNNNNNNNNNNNNNNNNNNNNNNNNNNNNNNNNNNNNNNNNNNNNNNNNNNNNNNNNNNNNNNNNN  
NNNNNNNNNNNNNNNNNNNNNNNNNNNNNNNNNNNNNNNNNNNNNNNNNNNNNNNNNNNNNNNNNNNNNNNNNN  
GAGAGCTGGATGCATCAGGACATCATAGTAGGAGACTGTTATTTCTTCTATGCTTTTCTTTCATTGTGGTCTCTGT

CATTCCTTTTCTGGCACTCCATATCTGTCTTCTCTCAGTTCAGTGGCATTGTAGCATAATTGGTATGTGTGTGTCTAT  
 GTGTGTGCATGTATAAGTCAGTGTGGGCGGGCATTGGCGGGAAAGGTCGTCGAAGCGTACCGGACAATTTCTATTTCAGGTGTT  
 GCTCTGTGCCTTATGCATCTGCATCTGTAAATAGCCCGCCCAATCTACCTACCTCATCCCCATACTGTTTTTATTTACTT  
 TCTGTCTTTTTCACACCAGTATTTCTACTTGCACATCATCTGCATCTGCTCATTATCACTCCAGTGTAACTGTCTGAAAT  
 TGTAAATCTTTCGCTACTATGGCCTATTTATTGCCTACCTCCTCATGCCTTTGGCACACACTATATAGACTTTCTTTTTTTT  
 CTACTGTGCATTGACTTGTTTATTGTGTACTGGCTTGTTTATTGTTTATTCCATGTGTAACCTCTGTGTGTGTGTCTGT  
 GTCACACTGCTTTGCTTTATCTTGGCCAGGTCGCAGTGTAAATGAGAACTTGTTCCTCACTAGCCCTACCTGGTTAAATG  
 AAGGTGAATTTTTTTTTTTTTTTTTTAAATGTGTGGCTGTCAATAAAAACGTAGCTTTGCTGTCCAAGAAATATAATGAT  
 AACACTATTGTCTATTATGCTCAGATCTAATCTAATCCAGTGAACCTAATTGATTGGTAATGTGTGACTTCTTCAGAT  
 GACAATTAGACCCATTGTGAGACTAGCATCGCATTGTTTTAATGTGACCTCTTTCAAGCTCACAGAACACAGACTTT  
 GTGAGGATAGACGGATTCCTTTGGCATGAAAAGCAGAAATGGTTGCGTCTGTTTTCTCACTTTTCGGAATTAGATATGCT  
 CGAGTGTATCTCACAAAACTCCACCGGGCTTGCCGTTGTGAAAGATCTCTGGCTCTCTGTGCCCTCAATGACTGATTGT  
 ATTCCACTCCCCTTGTACAGTTAGATTTGTTAGTGAGATTGCAGGGAGCTATAAACAGAGGGTTATCCCTTTAGTTGAA  
 GAAGTGTATGCCGACATTCAAATGAAAAATATTGACAGTGGTGGCATTGTTTGGCCACATGGTGGCAGTTGCCTTGTG  
 ACGTCATCACCCCTAATCAAATCAAATCAAATTTGTATTTGTACATGCGCCGAATACAACAGGTAGACCTTACAGTGAA  
 ATACTTACTTACAAGCCCTTAACCAACAATGAAGTTTTAAGAAAAACAATAATTAAGGAGCAGCAGTAAATAACAATAG  
 CTGGCTATATAGAGGGGTACTGGGGGGTGGGGGGGGGGTGCAAATAGTCTGGGTAGCCATTTGATTAGCTGTTTCAGG  
 AGCCTCATGGCTTGGGGGTAGAAGCTGTTTGAAGCCTTGTTCCTAGACTTGGTGTCCGGTACCATTGGCCATGCGG  
 TAGCAGAGAGAACAGTCTATGACTAGGGTAGCTGGAGTCTTTGACAATTTAAGGCCCTCCTCTGTCCCGCTGGTTAT  
 AGAGTCTGTGGATGGCAGGAAGCTTGGCCCCGGGATGACTGAGCCGTACGCCTACCTCTGTAGTGCCTAATCAAAT  
 CAAATCGTATTTGTACATGCTATGTAACAACAGGTATAGACTAATAGTGAATTTCTTACTTACTGGCACTTCCCAACA  
 ATGCAGAGAAAAAATGGAATAATAATAACACGAGGAATAAATACACCATAAGTAACGATAAATTTGGCTATATACACGCA  
 TACCAGCAGTGTGATGTGCAGGGTAAACAGTAAATGAGGTAGATATGTACAGGATAAAGGTAGGATAAAGTGAC  
 TAGGCAACAGGATATATAAACAAGTAAACAGTAAACAGTATGTGATGAGTCAAAAAGAGATGCAAAAAAAGGATCAATGCAA  
 ATAGTTAAATAGTTAACCAATAGCTACATGGACTAGCTATTTAGCAGCCTTATGGTTTGGGGGTAGAAGCTGTTTCAGGGT  
 CCTGTGTTCCAGACTTGTATGCATCGGTACCGCTTGTGTGCGAAAGCAGAGAGAACAGTCTATGACTTGGGTGGCTGG  
 AGTCTTTGACAATTTTGGGGCTTCTCTGATAGGGAGCTCGGCCCAAGTGTACTGGGCCGTACGCCTGCCCCTCT  
 GTAGCGCTTGGGTTTCCATACCAAGTGGTGTATGCAGCCAGTCAAGATGCTCTCAATGGCGCAGCTGTAGAATTTCTTG  
 AGGATCTGAGGTTTCATGCCAATCTTTTCAGCCTCCTGAGGGGGGAAGAAGCGTTGTCTTGCCTCTTCATGACTGTGTT  
 GGTGTGTGATGACCATGATAATTTCTTGTGATGTGCACAGGAACTTGAAGCTATCGACCTCTCCACTACAGCAC  
 CTTCCGATGTAGATGATGCTGCTCGGCCCTCTGTTTCTGTAGTCCAGATGATAGAAATAGTCTCGAATGGACCTAATC  
 CAGTTTATTTATCCACTCTCTGACGTAGTCTCATCAGGTATCCTGTACACCAGCCTCTATAGCGGGCTCTCTCCTTCT  
 TCGGGTGTACAGGATTTGGGACAGGCAGGGAAAAATCAATATCTTTATTTCTCCGACTCATTGAAGTAGAAGTCTCTCGTCC  
 AATCGAAGTTGGTGACAGCTGTTCTGATGTCCAGAAGCTCTTTTCAGTCATAGGAAATGATAGAGGAAACATTATGTAG  
 AAAAAAACACAGTTCAGAATGCTTTGTACCATAATGTATGGGACTCACTCTGTCTCTCACTGTGTCTCTGTCTCCCC  
 ACCCAGAACCGCGCTGATGCAGAGCTTCAAAGAGTCCCCTCCCATGAGTCTCTGTCTCTCCAGCAGCGCAGCGGAGG  
 CGTGGACCTCACCTGGACGAGGACGCCATCATCAAGCCCGTCCACTCCAGCATCCTGGGACAGGATGCTTTTTGAG  
 GTGAGGCTGACACGACACACACAATGAACCCAGATAGCGCTACTAATTAACCTGGGTCAAATACTACAAGAAGAGA  
 ACGTTCAAATCCCACCCTCTGCCACTCCAGGCAGGCTAAAGCAAACACTCAAAGTATTTGAAAGATTTTAAATAGCATT  
 TGAACCCAGGTCTGCCTACTATTGCTACTAATGCTACTAATGTTGGGTAGAAGTCTCTCGATTGGCATCAACATAAGGAC  
 TTATTGAATAAGGCTGTGATTTTTTAAATCTTGGTATCTGTGGAAAAGATATCAAAGAGAAAGCCAACAGCGGCTCGAA  
 ATGAGCTCATGTCCCAAGTTGATTTGTACAGAAATTTGTTGTGAAAATGGCTTTCACTGCATGGCTCACTTTCCCATAG  
 CCAAGTGTACATGACACAAGTCTCTGTGATTAAGGAGCTTGTGTTATGCCACTTGTCTCTCCCAAGTTGCTAATGG  
 TGTGGCTGTTGATGTTACCGTTGGTAACCTCAGGTGACTACGGCTTCCGGAAACCAAGTCTTTGCATGCTCGCTCGGGT  
 CAGAGAGAGACAAATGGATCGAGAATCTTTCAGAGAGCTGTCAAACCCAAACAGGTGGGGAAAACAAGGACGAGAAATTAAG  
 TTACTTCTCGTCTGTGCTGCTCTCTCTCTCTCCACTGTCTTCAATATGTCTGTTTCAATATGAGCATTTCTCTCATTT  
 TGTTTACTGTAACCTCCATGTGCTCTCTGTTTGTCTATGTCTGTAATGTATAGTCATCAAATACAGTACATATAAAACA  
 TAGCACTTCTACACTATCAGAGTTAAATAAATAACTAAAAAGACGCAAACTCAGCACTTTAGATGCGTTTGATTAAAACA  
 GATCTTCTAATTTCACTACACTTGATCTCTTAGTCTCGGTAATAGGCCCTTCTCTGTCCTCCCTCTCTCTCTCTTA  
 TCAAAAGACATTAACCGGAGACAGATAAAACTGCTCTTGTAGGCAAGGAGCTGCAAGTTATTAAGTAAACGGAGA  
 GGAACATCAGCCCAAGTGGATTGACTCATCCAGATGCTGTGACTGCAGGGTTCCTGGCTGAATCATGGGGCTCCAAGGA  
 CTCGACACGAGGGCTCCGAAATATCCTCTGCACCTCATGAATCTCCAACAGATAACATGATGGGAGAGATAAGACGCGG  
 TGTGATATCGATAGAGACCAGGATGTTCAATAGGTTTTCGAACCGTCTGCTGGGCAGACAGACGCTCTTGATTCTTCTTCT  
 TATTGAAATTCATGATGAACGGTTGAAAGGTTGCATCGGCGGACGTCCACATTTATTGTGAGGCGGCATACCAATGGAG  
 TACTTAAGAAATAACAACCTTTGGAAAATTTGCTGATATACTTAGCAATCTAAATTCGGTATTAAGAGCTGATCTGAGCCAG  
 GGCTGAGCAATCCAGTGGCATTTCAGACTAGTTGAAATGACTCAACCTTGAATAAAACATCACTCTGTGCAATCTGCAC  
 AGCATGCTCTCTCCATGGGGGATTTTCAGACATATGCTCTTTGTAATCATGTTTCAGAAAATGCAGCTCTCTGTCTGC  
 AACATTACCAATCACACATCCACTTTCTGTCTCTCATGCCTCCAGTACATATGATTTATCTAATTTATCTCCATCTGTAT  
 GTGTGCATATTTGTTCTTAGACTGTTCTTAACTAGTGGTGGAAAAAGTACTGAATTTGTCAAACCTTGGTAAAAGTAAAGAT  
 ACCTTAATAGAAAATAACTCAAGTAAAAGTGAAGTCAACCCAGTAAAATACGACTTGAGAAAGTCTAAAAGTACACTGCT  
 CAAAAAATAAAGGGAACACTTAAACAACACAATGTAACCTCAAGTCAATCACACTTCTGTGAAATCAAACCTGTCCACTT  
 AGGAAGCAACACTGATTTGACAATACATTTACATGCTGTTGTGCAAAATGGAATAGACAACAGGTGGAATATAGGCAAT  
 TAGCAAGACACCTTAAAGGAGTGGTTCTGCAGTGGGGCAACAGACCACTTCTCAGTTCCTATGTTCTCTGGCTG  
 ATGTTTGGTCACTTTTGAATGCTGGCGGTGCTTTCTACTCTAGTGGTATGAGACGAGTCTACAACCCACACAAGTG  
 GCTCAGGTAGTGCAGCTCATCCAGGATGGCACATCAATGCGAGCTGTGGCAAGAAGGTTTGTGTGTCTGTGACGCTAGT  
 GTCCAGAGCATGGAGGCGCTACCAGGAGACAGGCCAGTACATCAGGAGACGTGGAGGAGGCCATAGGAGGGCAACAACCC  
 AGCAGCAGGACCGCTACCTCCGCCCTTGTGCAAGGAGGAGCAGGAGAAGCACTGCCAGAGCCCTGCAAAATGACCTCCAG  
 CAGGCCACAAATGTGCATGTGTCTGCTCAAACGGTCAAGAACAGGCTCCATGAGGGTGGTATGAGGGCCCGACGTCCACA  
 GGTGGGGGTTGTGCTTACAGCCCAACACCGTGCAGGACGTTTGGCATTGTCAGAGAACCAAGATTGGCAAATTCACC

ACTGGCGCCATGTGCTCTTCACAGATGAAAGCAGGTTCCACTGAGCACGTTGACAGACGTTGACAGAGTCTGGAGACGCCG  
 TGGAGAACATTTCTGCTGCCTGCAACATCTCCAGCATGACCCGGTTTGGCAGTGGGTGTCAGTTCATGGTGTGGGGTGGCATT  
 CTTTGGGGGGCCGACAGCCCTCCATGTGCTCGCCAGGTTGACCTGACTGCCATAAGGTACCGAGATGAGATCTCCAGA  
 CCCCTTGTGAGACCAATGCTGGTGGGTTGGCCCTAGGTTGTCTCCATGCAAGACAATGCTAGACCTCATGTGGCTG  
 GAGTGTGTCAGCAGTTCTGCAAGAGGAAGGCATTGATGCTATGGACTGGCCCCCGCTTCCCCAGACCTGAATCCAATT  
 GAGCACATCTGGGACATCATGTCTCGCTCCATCCACCAACGTACGTTGCACCACAGACTGTCCAGGAGTTGGCGGATGC  
 TTTAGTCCAGGTCTGGGAGGAGATCCCTCAGGAGACCATCCGCCACCTCATCAGGAGCATGCCAGGCGTGTAGGGAGG  
 TCATACAGGCGCGTGGAGGCCACACACACACTACTGAGCCTCATTTTACTGTTTAAAGGACATTACATCAACGTTG  
 GATCAGCCTGTAGTGTGGTTTCCACTTAAATTTGAGTGTGACTCCAAATCCAGACCTCCATGGGTTGATAAATTGGAT  
 TTCCATTGATCATTTTTGTGTGATTTTGTGTGACGACATTCAACTATGTAAGAAAAAGTATTTAATAAGATTATTTT  
 TTTTATTTCAGATCTAGGATGTGTTGTTAAGTGTTCCTTTATTTTTGGAGCAGTATATTTAGTTTTAAATATAAATTATG  
 TTTCAAAAGTAAATTAATTTGCTAAAAATATACTTAAAGTATCAAAAGTAAAGTATAAATCATTTCAAATTCCTTATATTA  
 AGAAATCCAGATGGCACAATTGTGTTTTTACATTTTTATTGACGAATAGCCAGGGGCACACTCCAACACTTAGACATAA  
 TTTACAAACGAAGCGTTTGTGTTTGTGAGTCCGCCAGATCAGAAGCAGTAGGGATGACCAGGGCTGTCTCTTGATAAG  
 TGTGTGAATTGGACCATTTTCTGTCAAAATGTAACGAGTACTTTTGGGTGTGAGGGAAAATGTATGGAGTAAAAAGTAC  
 ATTTATTTCTTTTGGAAATGTAAGTAAAGTTGTAAAAAATATGAATAGTAAAGTACAGATACCCCAAAAAACGACTTAA  
 GTTGTACTTTAAAGTGTTTTTACTGAAGTACTTTACACCACCTTAACTTAACTCCCTTCTCTTTCTCTTTGGCTT  
 TCTTTTCTCTTTGGTCTTTTCCCTTTGGTTTTCTGTTTCTCTCTCTGCTTTGCTCTTTGCCACCTCTCTTTGGC  
 CCTCTCAGGACAACAGTCGGAGGGTGGACAACGTGCTGAAACTCTGGATCATCGAGGCACGGGAGCTTCCACCAAGAA  
 GCGCTACTACTGCGAACTTTGTCTGGACGACATGCTTTACGCACGCACCACCAGCAAGCCCGGACTGACACCGTGTCT  
 GGGCGAGCACTTTGAGTTCAACAACCTTGCCAGCTGTCGCAACCTACGCCCTTCATCTCTACAAGGAGACTGACAAGAAG  
 AGACGCAAGGTGAAGGCAACTCTCTCACAGTGTGCAAAACAGTATGAAACTGGTTAAATGACATTTTTGCAGACTG  
 GTTAAACAGCTTGCCCAATGATTAAGATGGATGAATATACTTTAGTTTCAATTACTATCTATTTTTCTCTCTTTCTTA  
 AAGCCCCATAACTCTTGACCACAAAATCCACATTTATTTCCCTCTCTATATCAGGAAAAGACACATACCTGGGACTG  
 GTCAGTATCTCTATCTCCAGCATCACGGGCCGACAGTTTGTGGAGCAGTGGTACCCGGTCATCCAGCCTAGCATCCTGGC  
 CAAGGGGCAAGCAGGGGGCAAGATCATCAATGCCCTCCCTACGCCCTCAAGTCCCCTTACCAGACCATGAGTATCCTGCCA  
 TGGAGCTGTACAAGGAGTTTGGCGAGTATGTTACCAATAACTACCGGACTTTGTGTGCGGTGCTGGAGCCTCTACTGAGC  
 GTGAAGAGTAAAGAAGAGGTGGCCTGTGCGCTGGTCCACATACTACAGAGCACGGGAAAAGCAAAAGTAAAGTATTGGCAT  
 GAAACATTAACAAGTTGTTACTTCAAGTACAGGTACAATGCAAGGTCAATTTCTGTATACACCTCACTGATCTCT  
 GTGATATGCCAGATAAATGTGTTTTGATTTGATGGCATAAATATGATGGAATATGACTGCCAAATAGTCTGAATGCTA  
 TAACAGTGTCTTTAAATACATAGGATGTGGTGTGCGCTGTAACCAAGTGAACATGTGTGCTAATGTAACCATCTCT  
 ATTACTTGATGGCCCATGGTCTACCAATATGCCATGCAGATGAGCCATTGTTTACTTTACTGACCACACTGGATATTCAT  
 TCAGTCTTTGAAGTTGGGCGAGTTCACGGTAGGACTCAACGCCATGCTGTGTAAGCAATATGCTGAACAGGCAACATAGC  
 TTCCATTGGTGCATTACCAATAAAATGTATTTATTCATCAAAAACATTCATATAAAATGTTTACCTCTCTTTGGATTT  
 TTCCACAATCAACAATCTTACAACCTCAGGTTCCCTCGAAATCAGACTGTCTCCACCAGAATCTTTCTGAGAATGTTTTG  
 TTGTTGTTGTGTGATGCTACTGTACCGAATGTATAGCTAGATGATGCTATGTTTGGGGTGGTCTAGGTTGAAATGCTG  
 TCAACCACCTAGCATATATCATCAAAACCAACACTCATATGCAACAATCTGCATATTTAGTTTACGTAACATAGC  
 TAACGTTAGCTAGTTGAAATAAAGGCATTGGGCATCTGTGTGGTTTTATGCAGTGTAGCTACATGATGTAGCTAGTTATC  
 GTTAGTTTCCAAATACAAAATATGTCAGCTAGCTAGCTAAGTAGCCATGTTAGCAAGCTTGAACATTGAACACACTAAGG  
 TTAGCAGCTAATGTAGCTAAAAAACGTAGGCTAAAAACGCAATCCAACACTTACCTACCTGTCCATGACAATGGTGGCC  
 ATTTCCGGGCATCACTCTTCCACCTTTCAAAATTAATTTCCAATGTTTTACCGGTTTCTTGTATCAGTCTTTTTTCTCTCT  
 TTTTCTCTTTTGGGGTCGAGTTGATTCAGATCCAAAACCGAGAATGATGCTTGTTCCTGTCTACATTTTCTGAAAATGC  
 TGGCCCTGCTACTAGGACAGTTTATCAGCAATAAGTTAGCTAGCTGTGTGGCTTCGCTGCTCTGTGTTGTTTCTTGC  
 GGCTTAGCTTGCAAGTGTACTTTTCACTTCTTCTCCAGCTCTGGAGCATGGCAGCAGGGTCATTGAGTACGAGGTTT  
 GTGCAAAAGACACACCTTGCCAGAAGGCCAGCCCAAGCGGCTCAGGGCTCAATCCCCCTGTTTTCTGTTCAAAAGTAAAA  
 CACAACAGAAGAAGTGGGGCGGCATGGGGCGCCATAAACCCTGCGGATTTCTATCTTTTAGGCACTATAAACTACAAAAT  
 AACATTAGTTTACTACTTCTTGGTTTTCTTACCAAACATAAAACCAAAAGAGATTGAAACAGAAGGAATATAAACATA  
 ACAAATTAACAATCTGACCTGAGGAAAGGCGTTATATCTCAAAATGAAATTTGAGAGTACCCAATAGATTATAAATGAAT  
 GTTTTTAAAAAGAAAGTCTATGCTATGTTGATGTTGTTTTGTTTCTCCAGGATTTCTTTCCAGACATGGCGATGTGTG  
 AGGTAGATAGATTCAAGACCGAGAACACCTTATCTCAGAGAGAACACTCTGGCCACCAAGACATAGAAGAGTATCTC  
 AAGCTGATTGGACATAAGTACCTCAAGGATGCAATAGTGTGGCCTTCAAGTGTTCACATGAATCACTCAATACATGTT  
 GTTGAAGTGTTTTTGCTGTGATGATTTTCAATATCTTCTGTGTTTGGCCTAATGGTCAAGTATGTTGTTTCTTTCCAGG  
 GAGTTCATAAGGGCGCTGTACGAATCAGAGGAGAATGCGAGGTGGACCCCATGAGGACACCACCTCTGTCTTCCAGA  
 CCACCAAGCCAATCTCCGATGTGCTGCGAAGTGGCACTCTGCAAAATCGTCAACTCCCATGGTCAAGTGTGGCATAT  
 GAGTACTTACTGTTTTTTTCAATCAAGTAGGATTACTCTGGGCTACAGCACCCAAATACTTATTTACAGAATTTGATT  
 GTTGAACACACCATAATTTGCATTCAGTGTGGCTACACTGCCTTACTAAAGCAGAATACTCCTATAAAATGAGAATAAC  
 ACGTGTATATTTGTATCTCTACAGTGTGTTTTCTCAGAGACTGAAGGAGGTGTTTGCCTCGTGGAGGGTCCGCTGTG  
 CAGAGAGGGGGAGGAGGACATCGCAGACCGCCTAATCAGCGGCTCCCTTTTCTGCGCTTCTGTGTCCGGCCGTCATG  
 TCCCCCTCCCTGTTCAACCTGACCCAGGAGTACCCAGATGAGCAGACATCACGCACGCTCACCTCATCTCCAAAGTGGT  
 GCAGAACCTGGCCAATCTCCAAGTCAAGTTCATTCATTCACAACAATTTATAATGTTATGCTTATGCTTAAACTTCTGT  
 AATATTTTGAATTTTTTCCGGGACACAGATTAAGCCTAGTCTGGACTAAAAAGCATGCTCAATGTAGATTCTCCATTG  
 AAATGCTTATTAGTTATTAATCCAGGATTTGGCTAGTCTGTGTCTGGGAAACCAGCCAATGGTGTGTAATCTGAGTAT  
 ACAGCATTTTACTCTTCTCTCTCTCTCCCTCAGTTTGGTATGAAAGAGGAGTACATGTGCTTCAATGATGATGATT  
 CTTAGAGATGGAGTGGGGCTCCATGCAACAGTTCCTTTTATGAGATCTCCAACCTGGACAGTGTGAGCAACGCAGGGGGCT  
 TCGAGGGCTACATCGACCTGGGCAGGGAGCTGTCCATACTGCACAGCCTCTCTGGGAGGTGATGGCCAGCTCAGCAAG  
 GTAGGGAGGATCAGGGTAAATATTAACAATCTAACCTTACAATATATGACCAATAAAAAAAGTAAAGTTACAGATAA  
 TCATTTATGAATAACACTACAATGGTTAAGTCCAATTAGGAATCAGGACAATAAAATAGCTATGATGTTGCAACT  
 CAGTCATCTGAAAGTATGAGACAGTGAATGAGTGGAAATGATTAAGTGCACCTTGAATTTTCAAAGATAACATACTTAA  
 ATGATCAACCACACTTTTTAACCATTTCAATGCTTTTCTTATGTCATGCTAACTTGATTCATGTGACTTCTTACC

CTAACCCACAGGATGCCATTATCAAACGAGGTCCTTGCCCGCCTCTGAATGACATCAGCATGGCCCTGCGTAACCC  
CACCTGCAGAGGCAGCCAGCCACCAGAACCAGACAGATAGAGTCCATGAGAGACAGACGGAGAGGCTGCTCTCACGACC  
CAGTCTCAACAGGGGAGTCTCCTCGGAGTTCAGAACTCTCATGATGAAAGGATCTCAACAGGTAGTGCCTTATTT  
AATCCTATCGGCCTATTTCTTGGAAACAGGTTAAGTATAGTCTGGACAAAAAGCACATTTGAATGGAGAATTTCCATTG  
AACATACTTTTTAGTCTATGATTAGGTTAATCCGTGTGGGGAAACAGCCCTAGGGGGATGGTTGGTTGGTGCATTTG  
TTAAAGTTTTACCTTTCTGCCATAATGCTNNNNNNNNNNNNNNNNNNNNNNNNNNNNNNNNNNNNNNNNNNNNNNNN  
NNNNNNNNNNNNNNNNNNNNNNNNNNNNNNNNNNNNNNNNNNNNNNNNNNNNNNNNNNNNNNNNNNNNNNNN  
NNNNNNNNNNNNNNNNNNNNNNNNNNNNNNNNNNNNNNNNNNNNNNNNNNNNNNNNNNNNNNNNNNNNNNNTGTGTGTGCC  
TCTACTGCACCAGTAGCTCCGATATCACCAGCCAGCCACAAGGTAGTTGAATTCAGAGTTTTGATAGCATTAAGA  
TCTGTTAGGAGCCATGTTCTACAGGAACTATGTAACGACATCTCCTTTCCATGTGGTAGCCAAGTCTGCGAGACGA  
CTGCAGGATAGTATGGCAGCTGTGCGCTCATAGGAAAATGATGCATGTACCTTAGTGGTAAGTCATGGGACATGCAATTC  
AGGCATACAACCACCCCTCTTAATAGATAAAACACTTAATCAACTTATTTGGCACTTTAGAATTGGGCACAGAAGGGTGT  
AGCTCTATCAATCTCGTCTAGGTGCTCAGTGTCAATAAAGTGTATATCTATGATGGACCTCCAGGACTCCACAATGAACA  
GCGTGTCTAACCTGCAGTCCGGTGGCCATGCTCAACTCTCCAGGCCCTCATCACCGGCATGGGCAGCTTCGGAGGGCTC  
AGCAGCCAGGGTGAGGAGGCCCTGGGCTCGGGCCGTAGTGCCAGCTCCGGGCCGGGGCCGCTCCGGCCGGCTCTGG  
GGATCCAGCATGTCAGGGGGCCTCGGCTGAGCCAGTTGAGCCAGTAGGGCACCACCAGGACTCGTCTCCAGCAGC  
AGCAGCAGCAGGCCCGCCGCTGAGATACCCGCTCTCCTTCAGAACCCCTGTTTACCTGGCCACCGGCACTGCAGAT  
GGACCCACCTTACCACCAGCACAGCAGGGCCCATCTCCGCGGCCCTGCTCCTGGCCCGGAGCCGACCCCGGTGG  
CTCGCACCAGGCCATATCCCCAGTTCCGCCACGGGGGGTTCTCCGCAGCGAGGACTGTCCACCCTGAGGACCGGGG  
CAGGGCAGCTGGGGCAGCCAGCCATATCCACTCACACAGTATAGTGACGACTACAGCAGGGCTGATTTTCGACGCGGG  
CAACTGTCCATGCAGCGGAGTATGATTAACTTAAGTCAAGAATGTGTTTACAATCATGTTCTACTTTGTGCAAAT  
TAGCCTTTTTGTCTCACTACTTTATAATAATTTAAGTCAATATTTGTTTGTAGCCTACATAAAATAGGATAGCATAATG  
TAAACATCTGAAACAGGTTAAGACAGGATAACTTGGAGTTCTCTAATGTCTTGTAGGATAATCTTCAACAGCAAC  
AGCAGANNNNNNNNNNNNNNNNNNNNNNNNNNNNNNNNNNNNNNNNNNNNNNNNNNNNNNNNNNNNNNNNNN  
NNNNNNNNNNNNNNNNNNNNNNNNNNNNNNNNNNNNNNNNNNNNNNNNNNNNNNNNNNNNNNNNNNNNNNNN  
NNNNNNNNNNNNNNNNNNNNNNNNNNNNNNNNNNNNNNNNNNNNNNNNNNNNNNNNNNNNNNNNNNNNNNNN





ATAATGTGTCATTCATTTAGTGTAAATAGTCTTCTCAGCATTCTGTTAATCTCAGGAGTTAAACGCTCTGAAGTTCAT  
 CCACTTTGTGTCAGCAATTTTACAGCTTTTCTGTGTGACTTCAAATTAACCAACCATGTCGTTTCAGGCGGAAAGTAGATGT  
 GATAAGATTGAAAGATAAATGAAATATATAATGAGCAAAACAGAAGAAATTCATTACCTCAGAAATATCGACCAGGTAGGA  
 GTTAGGATGTCAATGTACCCTTGTTCATTTGAATCCCATCACCAAAACAGCTGATCGCCATCTTGGATTTGACTTCATGA  
 TTGCAGTGACTTTTTAATTGATCTTTTACCTTTTTGTGTCTGTTGAAGAAAATATCAGAACCATTACCTTGAATGATGCAGA  
 TCTTGAAATTCAAAGGCAAGTAATTAATGATCCATGTTCCCTNNNNNNNNNNNNNNNNNNNNNNNNNNNNNNNNNNNNNN  
 NNNNNNNNNNNNNNNNNNNNNNNNNNNNNNNNNNNNNNNNNNNNNNNNNNNNNNNNNNNNNNNNNNNNNNNNNNNNN  
 NNNNNNNNNNNNNNNNNNNNNNNNNNNNNNNNNNNNNNNNNNNNNNNNNNNNNNNNNNNNNNNNNNNNNNNNNNNNN  
 NNNNNNNNNNNNNNNNNNNNNNNNNNNNNNNNNNNNNNNNNNNNNNNNNNNNNNNNNNNNNNNNNNNNNNNNNNNNN  
 NAATAAATGCTGGAGCTGAAATATCAACCCAGATTCGCGGTAGACATAACAGAGTAAACAAAATCTGGGACACTCAA  
 TTAGTATGATCGTTACGTATGGTATGTTAATATGTGGATGTCATCGTCCATTTCGTATGATATATTACAATTCATAA  
 AATATGCTACAAATTTGCAATACGTATGATATGTTATTAAGAATTCAAATTTGTTGTGGCTAATGTTAAGTAGGTGGCTA  
 GGTGGTTAAAGCTAACGTTAGCTAGGTGGCTATGTTAGCTAGGCTGGGGATTAGGGGTTAAGGTTAAGGTGAGGAGTTAG  
 GTGAAAGGGCTAGGGGAGGGTTAGCTACCATGCTAAGTAGTTGCAAAGTAGCTATACGCTCAACCATCCACCCCGACCG  
 ACTACAATCCTTTAATTTTTGCGTTAAGTAACCTTCGCGCTGATGTAACCATAACCAACATAACATATCATACTCATTTG  
 AGTGACAGGATTTAGTTTACTTTTACATCTAGTCTGAGGCCAGGCTGGACGGTGCCTTTGGAAAGTATTCAGACCCCT  
 TGACCTTTTCCACATTTGCTACATTACAGCCTTAATGAATTTAAACATTTTTTTAATCCTCAGCAATCTGCACACAA  
 TACCCATAATGACAAAGCCAAAACAGGTTTTAGAAATTTGTGCAATGTATAAAACATTAACAAACATTAACCTATTTA  
 CATAAGTATTCAGACCTTTTGTATGAGACTCGAAATTTAGCTCAGGTGCATCCTGTTCCATTGATCATCCTTGAGATG  
 TTTCTACAACCTGATTGGAGTCCACCTGATTGGAGTCCACCTGTGGTAAATTTCTATTGATTGGACATCATTTGAAAAGG  
 CACACACCTGTCTGTCGGTCCCACAGTTGACAGTACATGTGAGAGAAAAACCAAGCCTTGAGGTCGAAGGAATTGTCCG  
 TAGAGCTCCGAGACAGGATTGTGTCGAGGCACAGATCTGGGGAAGAGTACCAAAACATTTCTGCAGCATTGAAGGTCTAC  
 AAGAACAAGTGGCCCTCAATCTTAAATGGAATAAGTTTGGACCCATCAAGACTCTTCTAGAGCTGGCCGCGCCGGCCAA  
 ACTGAGCAATCGGGGAGAAAGGCCCTTGGTCAGGGAGGTGACCAAGAACCAGATGGCCACTCTGACAGAGCTCTAGAGTT  
 CCTCTGTGGAGATGGGAAAACCTTCCAGAAGGACAACCATCTCTGCAGCATTCCACCAATCAGACCTTCATGGTAGAGTG  
 GCCAGACGGAAGCCCTTCTCAGTAAAAGGCACATGACAGCCTGCTTGGAGTTTGCCAAAAGGCACCAAAAGGACTCTCA  
 GAACATGAGAAACAAGATTGTCTGGTCTGATGAAACCAAGATTGAACCTTTTGGCTTGAATGCCAAGGCTCACATCTGAA  
 GGAAACCTGGCACCATCCCTATGGTGTAGCATGGTGGTGGCAGCATCATGCTCTGGCGATGTGTTTCAGCGGCAGGGATT  
 GGGAGACTGTCAAGATCGAGGCAAAGATGAACGGAGCAAGGACACAGAGAGATCCTTGATGAAAACCTGCTCCAGAGCGT  
 TCAGGACCTTAGACTGGGACAAAAGTTCACCTTCCAAAGTACAGCCATCAAGCAGCAGCCAAAGCAGCAGCCGCGGAA  
 GGCTTCGGGACAAGTCTCTGAATGTCTTGTAGTGGCCAGCCAGAACCAGGACGTGAACCCGATCGAACCTCTCTGGAGA  
 GACCTGAAAATAGCTGTACAGCAACGCTCCCCATCCAACCTGCCAGAGCTTGAGATGATCTGCAGAGAAGAATGGGAGAA  
 ACTCCCTAAATACAGGTGTGCCAAGCTGTAGCATCATACCAAGAAGACTTGAGGCTGTAATCTGAATACTTATAAAAA  
 TGTGATATTCCATTTATTTTATTTTTTTAGTAAAATAAAAACCTGTTTTTGTCTTGTGCTTATGGGGTATTGAGTGTAGA  
 TTGATGGGGGGGAAAAACGATTTAATCAATTTTAGAATAAGTCTGCAACATAACAAAATCTAGAAAAGGTCAAGTGGTTT  
 GAATACTTTCCAAAGGCACTGTACAGTGTAGCAGTATGATGAACTTTGGATTTATGATTTGACAGATTTAAAATAC  
 ATATAGTGATACATTAATGATGTACTCTTACACACTCAGACAAATATGCCAACATTAATTTGCACAAATTCAGTCAT  
 ATACGGAGACTTCTTAAACGTGTACCTCTTTGCATTAGGTAAATGCTTACCCTCTGAATTTCTCTGAAAACCTCAGCATC  
 AATGGTAGAATTCCTGACCAAAATGCATCAAAATGTTAGCTGTTTAAATGCTCCATTTCAATGCTCCACTATTATCAA  
 TGTTGGCATTGCAAAACCTTGAACCTCTTCCATCTTCTTACATCTTCCATCTTGTTCATCCCTCCACTACTTTTTTT  
 ATTTCAATTTCCCTGTGTTGTTTTGGGATGATAAGCAAACCTGTATGATCAGAATATTGATGGTAGTAATATATACTTAGG  
 TCTAGATTCATCAGATTGACAGCCGAATAGCCGTTGTTTGTAGTGTGTCGGAGGTGGAACCTGCGTTAGAGCTGTCAAATC  
 CACAAGTGGCAACGAAACACACTCAACGTAATCTGACAAATCCATGACCCGCTTAGAGGTTTATGACGCCGCTTAA  
 CCAATCAAACACTCAAATTAATTTGATAGGCTTATACACTCTATACATTAGCCTAACATCAATGGATTTGAGAG  
 TCATTATTTCTAACATCGATAGAGCCTACAATTTGTAGCGCGTTTTGAACTTCTAACCGGTTAGGGATAACAAGTAAGG  
 GAGTGGTTTTCAAAGTACCCGCTCACCGATAGGTGAGTCTGCTGTAGATAAATAAAACATTTGCTATGCAGATGTCGGCC  
 AACGCTGGTTAACGATGGTAAATGCTCGATCTGATTGAATCCAGGCCCTAGTTAGTTCTAGTTATAACAAAAGCTTGAC  
 AATTCAGATACTCTATTAGGTACACGTACAAACACTGATGGCTCTGCTGCAGTAATACATATAAGTAGGCTCTATTCCAA  
 GAACCAATATCAACAAGGTAACACTGACTACAACCATATACAACAATACCCCTGCTCAAATCAACACAATCTCACCTACACA  
 CACTGCACGTGTCTCAGAGGAACACGTTACAGTGGTCACTCAACAATCCATTCAATTCGACTCATCTCCCTCCAC  
 CACTCCCCAAAATAAATGACGGGAATTATGGGAAATCTCCGTATCTGACACAATCCTTTTCTGAAAATAAAACAACTGGT  
 TGGCTATATGTCAATGTGTGTTTTCTTTGAGAGTGTGTTATATATTCCTGTATGTATGTGTCTGTATGTATATGGCA  
 CCTGAGCTCATAAGTTGATCCAATGTTGATGATTGTCATTGTGAGTTTGTGATCAAGTGTGTCACCAGTACTGTATTGTTG  
 TTCTTTTTGCTCTGGGTCATACTTGAGAGTTGCTAGTGTCTTTATATGATGTCAGTCATCTACTGCTGTTATGGAA  
 TATTTGGTTGGTTTTGTGCGTCTAATTTCCACAATGATATGCCTAGTTTGAACAGCAATTTATTATTAATTTCTCATTCA  
 GTTGTGTTGGTAAAGAACATTTGAGAATGCGTACCAAAAGCATATTAACAATGCACCTAACATTGCCCAATTCATCCACTA  
 TGTGTTGTGTTTTTGTCTACAATTTCTAATTTTTATTTAGTTGCACTTTTGTACAAAACATAAACACCAAGTTGTTCAAG  
 TAAGCAAACCTCTGCACATATGGATCTTAAACAGTGTGATGCACGTTTGTAAAGTTGACTGGATCGCTGCTTCTTTTTAT  
 TAGCATAGGTTGGCTACCTAGCAGCTAGCTAACTTTCTTATCATAACATATTTGCACAATTTCCAGTTGTATTGGCAGG  
 TCTGGCTAAACTTGGATAAATAATGTGAAAGGGTTTTGTAGTAATTTTTGTAGAATGGTTTGAAGTAATCCAGCATTGG  
 TAGAGAAATACCACTTGTTCCTTGTTCATAACACATTTCTGTTACTGTTGCTAGCACCAAGTAGGGAATGGGATT  
 AGCATGTATGCTAACGGTAATATCTGTTGATATGGTTATCGCCGTGTGCTTTACAAGGTTCTGAGTGAGAAGAGAAAAG  
 GTCTGCCAGTTCAATFACACTTTTTTGTCTCTTTAGACTGGAACACCTGCTATATACAATGGACACACCCACCC  
 TGATATTTAATGCTAATTCGTTTTTGAACAACAAATGGCCTGTTCCGACTAATTTCTGTACTGGATGCAGATCATAAAACA  
 GTCTTGAAATACCTTTTTTCTGACTTTCACCTTCCAGTGCTTCGTTACATCTTTTAAAGACTTCATAATCTTTGGTACA  
 ATCATATGAATGGTCTTAAATCCTTAAATGTTCAATGAAGTTATTACACATTTGAGAAAATGTCTTGGCGTCTCAGTAGAG  
 TAAATGTCCATTGATTTCTATTCTGTAGAAATCTTTTAAATGATTCCACATTGCTGTTTTTACTTGGATACATTAGAC  
 ACCACAACCTCCATCAGTGCCAATAACCCAGCTATTTTCTTCTACTGCTCCAACACAGACTGCATTGAACAGGACTGG  
 ACATGATGACTTTCATTCAGAGCTTGATTTAATTAAGAAGTGAATCAATCTGGTATTTGCAATGACGTTATTCTGCGCC

AATGTAGGTAAGGATAGATAGCAAAACCAAACCTTTGAGTTATTTCGCTTATTACAAATTCACACCCAGTGCCTTACAGATT  
 TGGTAAATTAATGAGCATCTATTGATAATTGGTCAATGGGTATGGGTTAGAAATTCGATTTGGTGGGTTAGACACAGTTG  
 AGATTTTATTCAAGAGCTCTGAATACTAGCTTCTTATCAAGCTTTGTAGATCAGTATTTAGTCGTTATGTTCCTTAAT  
 TCGCATCTAAAGTCTAAGAATTACAGTAACCCATCTGCATGTTAAACTATTATAAATATGCAATACATAAATATTATCA  
 TCTATAATGTTTTATTTAAAGTACTTATTACTATTTAAATGTTAAAGTACTTATAAGGTTCAATGACGTGTGGGAATCA  
 ACCACACACTTGACAAGGGAATAAGGTGCATGAAAAACAATATTGAATTTCTTCACATTTATTGTGGTCTTAGCTAAG  
 CTTTCGGTGAACGCTTTTATTCTTTATTTATTTTCTTCTTCTGTGAAAGTTTGTCTGACGAAGGTCAATTGACTGA  
 AAGCTTAGCAAAAACCATGCTAAACCTGAAATGTGCATGGATTTTAAATGTGAGTAAGATTAATTAAGGTGACACAATTGT  
 ATCAAGTTATAGAGTCATAACTATTTGTGTCCACATGGTTTTCAAGCCTTTACTACAGTATATTTAAGCAATAAGGCACG  
 AGGGGATATGTTAAGGTCAATATACCACGGCTAAGGGCTTTTCTAGCATGACCAATGCAGAGTGCCTGGATACAGC  
 CCTTAGCCGTGGTATATTGGCCATACACCACAAACCTCGAGGTGCCTTATTGCTATTATAAACTGGTTACCAACGTAAT  
 TGTATACGGTCTGATATGCCACGATTGTCAGCCAATCAGCATTAGGGCTCGAACCACCCAGTTTATAATACAAATTAGA  
 ATGTATAGAAATTCCTTGAATGAATCTCATTGGCTAAGATTGACACAACCTCTCATTCTACTTGACTGCTCGGACTCCCT  
 TTGACACCCGCTCCCTGACTAGTATCCCTTCTAACTCAGCATCATACGAAGATCAAGACACTGACATGTTGGTCAACCCA  
 AGATTGTAATTCCTTCCACCTTTTCTTTTCTGACTGTATCCCTCTCCTATGCTGTCCATCTCTATTGGTGTACCTCAT  
 ACTTCTGCTCTGTAACCTATTTTCTCTATTTCTCTTCTCCGTTGTCTCTCCCATCCCTGTCACTTATTTCTCTCCCT  
 CCCTTACTCCCTTTGCTTCTACAGATCCCTTCTTCTTCTTACCTCCTGCTTTGATCCTTTCTATCGGGACCCATC  
 ACCCCACACTATTTCTCCATTTCTTTTCTTCTACATTTACTGATTCACCTATTTACTCTCTCCTTACCCACCTGT  
 TTGTTCTTCACTGGCCTCCTTTTTTATTGATTATTCCTTGCTTGTATATCTCCTCTCCTTCCATCCTCCTGTTA  
 CCTTCTCTACACATTTCTGCTTACATATGACTCTTATATTGCCTCACTCTCTTCTCCTGGATTGGCTGACTCCT  
 TTACACCTTTGTCCATGCCTCAAATCCCCACTGAATGCCCTTCTCCCACTCCCATCTCTCCCTCTCCTACTCCTCT  
 CTCCTCCCTCTCTCTGTCTTGTAGGGGGCCAGCATTCCTCCCTGGGTTTCAAGCAGACCCCTGTGTGAATACTGAAG  
 TGGAAAGGAGGAGGAGGAGAAAAGAAGGATGACATGACCCTGATCCTGACCTACTACCTTCTCCTCAGGCATCCCT  
 CCACCGCTTGGCCGGAATGAGAATGGAGTCCCTCCCCACCCGAGACCCTCCTCCTCCCCCACTCCTCATCTCCAC  
 CCCAGTCCACCCAGAATGGAGAGCTCCGTGGCAACCTACATCCTCCCAAGTGTCAAGCAGGAGGAGCTGAGAGCAC  
 TGCAACAGCAGGACTGGGCATAGAGGAGAGGGAGCAGGTCAAAAACAACACAAAACCAATCAGAGAGAGAAGACACAAA  
 TAAAAAGTCTTGCCACATTTCCCTTCTTTTGGAGGAGATGAGATGACTGCAATCTTCCCGTTTCTTTATGTGTAC  
 CCAACCAGAGAGAGAAGAAATGTGTGGGGGGCAGCAGTATTGTACATTTAACTGTACAGTACATTACGATTTATCACA  
 CAAGACAACAAAGGGCTTTCCAATGGACCTCATTCCGTCATGCTCAAACAGGGCTTTGGTCAATCTGTCTTGCAGG  
 ACAAGATAATGACTCTTTAGTTATCGTTGACATTTGGGATCCTCATGTACTGTTCAATCGATCAAACTATAGAGCC  
 TATCAAACTACTGGTATAGGCTAATCAACAAACCAAGCAACTACGTGAGATTTGCTTTGTGTGTTTGTAAATCAAAATA  
 TAGACCGTAAACAAACACTATATAATGTCTCACTCCCCAAAGACTTCTCAGTAGCCAATAGCATCCTACTATATACATGC  
 GTGTAGTATCCATAAATCCATCGATAAAAGGCTTGTGATTTCCCTGTCTGAAAACCTCAGCTCTCAAATTTCAATGGT  
 AGAGATGTGGTCATCTGGCTTTATAGTTTGGTTTCCCTAGTGCCTTTGAGTGTATTTTAAACAGGGTTTTCAAATGACAGG  
 CGGAGATGATATTGACAGAAAGATTAGATTATTTGATGATAGTACATAAACAGTCTAATCAAGATCCCCAAAATATCTATG  
 CTTTTTGAATGACAGTCTAATCTCGAGTGCAGAACAGCAAGATAACAGTTCATTTTTGGGATTTACAGACATGGCCT  
 ATGGCCTAAGGAAAGTGTGTGATGTTTTCAAAAATGTGTTAATTAAGGGACTTCCCATTCGTGGACTGTCGAATGTTTT  
 CTCTTCTCAATCTCAGAACCTATGTGTGATCAACTGGTGTACAGACACAAACAGTGCATTTTCAAATCAAGTGTGTGT  
 GTCATAGGACTGCCTCTCATGTTTCCCACTGTCTGTATGTCTGTCTCTCACTCTGTCTGTTATTGTCAAGGTAGCCTA  
 TTTCTTTTATGATTTGTCTGTCTGTCTGTTATGTGTGTGTGCTGTCCCTATGTGTGCAATTTGTTAATGGAGTGGGAGC  
 TGGGTCAAATAGGGTCTTAAACCAATGAGACAATAGCAAAGTTGTGAGTAAAAGTTTACCAGCAATTTGAAGTGGT  
 TGAANAATATAAAGGAATGCTATTTTTGTACCTCAGTGTCCAGGCATATAACGTAGTCACTTGTAAACCTAGTACACT  
 TCCAGAATTTGTGTATGGCTTTTTCTGTTTAGTACCACAAACTATTTATTTGATTTCTTATTTGGGGTAGCCAGTTAAG  
 TCGACCTTAAAGTGCCTGGGCTCAGATAATGACATTTTGGCCAGTGTCAAACAGTGCCTCAGCCAAATTTGATGTGGC  
 ATAGACTTTCTCCGTGTGTTTTCGAGGGACTATTTTAAAGTAAACGTACCATTACAGTGTGCAATTTTGAAGAAAACAAGT  
 TTGTTTGGGGCATTTGTAGTAAAGATATTTCAAATCTAAAATATGTTACACAGTGGACTTAAAGGAATGATTGCTTTG  
 TGCAACTGTTTCAGATATCACCTGTGAGTGAATACGTGTTATACTGTGTTGTGATGCTCTTGTGTTTGTGATAAATTTG  
 CCATTGTAATCTTTGTTTAGATGTGAATTTGGGTTTATTTTGGCCCTTTCAGATTCACACTGGTGGTGTCTTTATAACTAG  
 TTGGATAACTTTCCCTAGCTGGCTTAGCGTCTCAGAGCATTAACATGCTTCAGACAGTCTGGTTTTCAGAACCCAAAC  
 ATCAGTCTTATTTAACTCTTTTATTTGATTAAGATCAATTTACTAAGGGCCAAATCCTAACTGATTTATATTTTATTTGCA  
 GTTCTCCCATTTGGCATCATGCTTTTACGAGTAAGTCTGAGTTTAAACATGCAGATCTCAAGTATAGGATTCGGCCTTAGTGT  
 GTAGGGTCAAATGCCCTCCGCCAATGCTGTGTGATCAGTACTAGGGGATAGCCATAACGTAGAGTGGGTGAGATTGAG  
 AGATATGAGAGAGATTAGCCATGAGTGTGAAATAAAAGTGAACCAATGTGATTATTAATAGGGAGAGTTTGTAGTAG  
 TTAGCTTAAATCAGCTAATAGGGCTACCTTTTCGAGTGCACAAACCTTTCATATCAGTAATAAGATGGCTTTTAAAGCAGCT  
 AGGGCTTTACGTCTGCATTGAGTAAAGATATGGGACTCTACAGGGTCACTGGTTGATATATGAGCATTGCCATTAATATA  
 CCTCAGAGACGCAGAATGAGAGACTCAGGTAACAAATAATTTGCCCTCAGAGCTGAACGCAAACTGACAGAGATTAATCC  
 AACTTTGGAGTGAATGCCATCAGATCAGTGGTTGGTCCATCTATTACAAGATCTATCCCACTGGGAAAAAACTGGTTGA  
 ATCAACAGTGAATCCACATCATTAAACAAAAAGGCTAAATGTGATGTAGTTATGAATTTCAATAGGGACGTAAGGGAAT  
 GTAGTATTTTTTTTACCTTACTTTTAACTAAATCCAATGACATGGATTAAATTTCACTTTAGTTGACAACCTCAACCAAA  
 TGTAATCAAATTTAGACTTTGAAATGACGTCTGTGCCAGTGGGATGGCTATGATTGGATAGCAACTCATCAAGCACCT  
 CCCCCTTCTTCTCTCTGTCTTCTTTTCTCTCTTAGCCAATCACGCAGCTTCGTGGAGGACAATCTGGAACCTAAT  
 TGGCTGAGGCAACATGGGCAACCCGATGGCCTGGTCATATATCAAGAGCGCTCTCTCGTGTGCGATTGGCTGACAAAG  
 GGAGAAGTTGGGCCATTTGGTCCAATTTCTCTGACCTAAAGATAGTCCAGAGCCACAGCTGACCTGTAAGGATCTGCTG  
 TGTATTTACACTACTTTACTTTGGGCCCTCTCTCTCTGACTGGATGGCTGGACAATCTGTATTTGATGCTTGTGATTAGA  
 TATTTGATTTCTTTTAAAGACGTGCCAATCTCGGGAAATGGTTTTGTGGCTCATCAAGCATGTGAAGAACAGCTATGC  
 AGATTGACATGATATTAACCTTTTGGGATTGAGCAGTAAATTAATGAGGGAGAGCTACTGTGTGTAAGATGCATTTCAA  
 AGGTGCTGTAATTTTCTTTCTTACATTTTCTAAGATCTCACAATTTGTTTTCTTGCAATTTTCTTCTTCAACATTTTC  
 TACAGTCCACCCAGATCTACCCATTTCTCTTCTATCTATTCTTAACCATTTTCAACCACCCACTTTATTTTCAACACT  
 TTTAGACTTTTCTGCTCCTGTTTCATATCTCCCATGGTTTCGGTTTTGTCTTTGTTCTTTATCTCTATTTCGTTTTACATT



TAAAGGAAACTAATTATGCACAGCCTATTACAAGTAAACTGCTACAAAACAAAAATATTGCTTTGAAAAATGTAGACA  
 ATGCTATGATTTATATTTCTATAATAATGCTTATTCCTACCGTAGTACTACAAAACCTATTAATTTGGAAATCTTCCTGCG  
 CAATGTATTATTTCTGATAATGACAAGACTCTAGTACTTAAAGACAGTCCAGAAAACGATCAATTTTATATCAACTGATT  
 TTTCTTAAGACAATTTATGGAACATTTCCCTTTTGTGGAGAAAGATTGCCCTGGGATGTGACGGATAAAAAACAAAAC  
 TGTGTTTTTACCTGCTCCCTCACAAATGATTTGCACGTTGCAGTGACCTGTACCCCTCCACTTCTCTCTGTAAATCCCTG  
 GAAAAAGATATGAGGATGGATGTTGTTTTCTCTACTTGACAATCGCTGGGGAGCTCTCCATTTTACAGACGATCTAAAAC  
 TCCTTAGAAAAGGACATCCTTACCATCACGTTTTTGTTCCTATTTTCAGTCTCTGATGTAAGCTTAGTGACCAGATGC  
 GAGTTATCATGTTTTTCCAGTGTGGTGAAACCGAATTCCTGGAGCCAAGTTCTGTATAACTTCCATTTGATTTATTTGT  
 ATGGACTCCACTGACACAGAAGCTAAATAAAACCTGTGCCCTCCTCACCTCCGACCACTGACAAATGACACATCAAAC  
 GAGCGAGAGATTAGAGGTTAATACTTTTAAGTGAATGTGTGTGTATATACAGTGTGTGTACAGTTGTGTGTATATA  
 TACTGGATATGTGTGTATATATAGTATGTCTATGTGTATATACAGTTTGTGTTGTATATGCAGGGGTACAGTTTTTTTC  
 CTCATCCTCTAATCTCTCTCTCTCTCTCTCGTAAATGACGATTTTGACTCCTCAAAGAGAAATGTTGGAGTGGAGAGGT  
 TCACACTGGCAATTTAAAGGACAGCTGTCTGGGATGCCTTTCTGTGCAGACACTGACCAATCTGACACCTACACACCTA  
 ATTAGCCTCTCAAACAATCTCTGGCTTGCCTCATTTTCTCATCAACTGAGGCATTTTAAAAATTAATTTGGGTGA  
 CCAAGCAATGTTTGTACATATACAGTATGTAGAATAACTAAGATAATATTTCCAGTGACCTCCATCTCCTTTTTTTTTTA  
 ATTCCTGTAACCTATTATGATTTCTTCTTGTATTGATTAAAGTTTTACGTTTTCTCTACATTAATGTTTGAATGGTT  
 GTCATTCAGATGTATATAATTATCCAGACAACCTTATCTAATCTTTCCAATTTAGTTCCCGAAGCTGCCTGCCTCATAG  
 ACCCTCTGTGACGGTGAACATTTGGTTCAGATCACACTTACTTTGTTGAAAGCAACTCTCCATGCAAGTAAACACCATGT  
 TATTAGCCATTTCTCAAGTTCTATTAAAGTGTGCCCTCAACTCGCCAAACCTCCCTAACCTTGAACCTTCAACCCCA  
 GGTCACTCATAGTCATACCCCTTGACAAGCCATAGTCCCCAACCCCTCATTTTTTGTTTAAAAAGGACAGACATTCGG  
 GGACTGTGTATATTAATGGAAGAGTGTATTGAAGAGTGTATTGCCATTGTACATGGATTTGTTATGAATGTGGATAT  
 TCTGATTATTTAACTATTATTGTAATAATGATTATGATTATTGCCACTTTGATTTTGTGATTTCCTTTGATGCGGT  
 CAATAACAATTTCTCATTCTTTTTGTAATAAGCCGAATTTATATTTTTTTCGGGTGGGTGAATCTGGAGATAGAATA  
 CTTAAATAAATGAAATAAACAATAAATAAATTAACCTCTAAATTAAGATGTGATATGATTTTTTTTTTATCATTCTC  
 AATAGTCACCACAGTGAAAAATATCTTAACCTTTACTAGGCTGTGGCCATTTAATGGTTTATGAGGCTATTCTGGGG  
 TCCAAATCATGAGATATACTGTAGGATACAGAAACATCATTAGATTATCACTGGACAACCAAGACGCAGTATGCCAGTC  
 AGATCATAGTAGTGCAGCTTACCATAACCAATCATGTTTGCAATATATTTGCTGAGGCTGTTGGTGCATTTTCATGTGA  
 GATAAAAGTGAAGACTAGTCTTTTTAGTAAGTATTCACACCCCTTGACTTTTTCCACATTTTGTGTTGTCAGCCTGAA  
 TATAACATGGATTTGAGATGTGTCACCTGGCCAAACAATACCCAGAATGTCAAAGTGAATATGTTATTTAG  
 AATGATTCAACCTTTGTTGTGAAAAGCCTAATTTACTAGGATTTAAATGTTGAAATGTGCTAAAGAGTACATAATAAGT  
 GCAATAATAGTGTTTAACTATTTTTTTTATGACTACTCATCTCTGTACCCACACATACAAAATGATTCGAAGGCTCT  
 CAGTCTTACAGTGAATTTCAAACAGAGATTCAACCAGAAGGACCAGGGAGATTACCATGAGGCCAATAGTGTCTTTAA  
 AACAGTTACATAGTTTAACTGTGATATAAGAAAACGAGGATGGATCAACAAATTCACCTTTAAGCAGGACAATAACCTA  
 AAACAACAAGGCCAAATATACACTGGAATTGCTTACCAGATGACATTGAATGTTCCCGAGTGGCCTAGTTACAGTTTTGA  
 CTTAAATCGGCTTGAAAAATCAATGGCAAGGCTTGAAAAATGGCTGTCTAGCAATGATCAACAACCAACTTGACAGAGCAT  
 AAGAGCATAAATGCAATTTACTACAATCCAGTGTGCAAGCTCTTAGAGACTTACCAGAAAGACTACAGCTGTAA  
 TCGCTGCCAAAGGTGATTTCAACATTTAGTGTGCGGGCGTGAATACACATGTAATTTCTGATATTTCTGATTTCTATT  
 TTCAATAAATGTGCAACAATTTGTTAAAAACATGTTTTCACTTTGTCTATTATGAGTTATTGTGTGTAGATGGGTGAGAAAA  
 AAAAAAATTCATTTATTTGAAATTTAGATTGTAACACAACAAAATGTGGAATAAGTCATGGGGTATGAATACTTTTGGG  
 AGGACTGTATGTAGCCTGATACATCATCCGGTGTAGCTTGTAGCTAGTACCCTGCTGACATAATACAATAAATTTGT  
 TTGAAAGGTTCTTCTCAGGACCTCCGCAAGCCAGAAATGTTGAATAATATTACATTTGAACTTACTCTACCGGTTGTCTTG  
 GTGGTTGGGCATTATGTTGAAAAATTTAGACAAAATATCCACAGAAAAGTGTATTAAACTGACTTTTTCTAAACCACCC  
 CTGCTCGCATCATAAGCCATGACAAAATGTGTAGAATTCAGGACCCCGAAAAACAGAAAATAGCAAACTTTTCAAG  
 GAACAGAAATAGAACATGGAACAAAAGTAATCCACACTGTTCGGGACAGAACTGTTATTTTAAAGACAAAACCAGT  
 TAATAACCTTCTTTAAAGTTGCAGGCATTTTACTAGTCCCCAAGAAAATGCCGCAAGCGCCTATGCAAAACCCTCAC  
 TCTGTCACTCAGAACTTATTCCAGTGTCTGCCGTGCAAGCTGAAATCTTTGTGTGTGTGCATATTTAGGATACCTGCCCA  
 TCCCCCTCCAAAGCATAGGCTACTGTACTGACGTTAGAATCGTGATTTCAGAGGATAGGGAGATAGATTTTTAATTAGCT  
 TGGGAAGAATGGATTAACTTTTTAATGCTAGTTAAGGATGCAATAGGCCCTAGTTATAATGTTTCACAAAGGATTTATTA  
 ACTACAAAAGGTAGATGTGTTTTAATTTCTGGTCCACTCTGCACACACAAGCTTGTAGCTAGCTAGCTCAAGCTTG  
 TTAGCTAGCTAGCTCAAAGCAATTTCAAGTTCTCCATAGAAGCCCGTCTCTTAGGTATAAATTCAGTGCACAAATTC  
 AGATAATGATGTCTAACAACATGCCCAGGACTTCAAGCCTCCTCCACCCCTCCTCTGCTCTTTTTCTTCCCCACCA  
 ACAAATGTGCTGATCCTTGCACCATAGGCTACACTGTCTGTCCATCACACATGTAAACAACACTACCTTGCTGCTCT  
 ATCCGATTTGATTGGTAAAGTAATTTAATAAGCTAAATGTAAAAAACTGTTGATATCACAGGTTAAAAAAGGAACAGTAA  
 GGAATGATATAAACCCTGACTTGTGGGGTTCCAGCTAGTTCAGAACTATATTTTGTGCTGGAACAGTGAACCGGAA  
 TGAATAAATGTGTTCTGTTTCAAGAACGAAACGATTTGAAAATAAATTTGGTTCCAACCCCTGGTTGTGGGGCCCCCTGA  
 AGTAGGTCGCCAAAACCCAGATGTGGTGATCCGCGCCCTCAAGTACAGTTGAAATACATTTATTTCAACTGTACTTGAA  
 ATAAATACATTTAAACTACGTTTTTTCACAATTTCTGCAATTTAATGCCAGTAAAAAGTCCCTCTTAGGTCACTTAGGATC  
 ACCACTTTATTTTAAAGATGTGAAATGCCAGAAATAAGTAGAGAGAATGACTTATTTTCAGCTTTAATTTCTTTCATCAC  
 ATTTCCAGTGGGTGAGTTTACATACACTCAATTAGTATTTGGTAGCATTGCCTTTAAATTTGTTTCATTTGGGTCAAATGT  
 TTCAGGTAGCTTCCACAAGCTTCCACAATAAGTTGGGTGAATTTTGGGCCATTCTCCTGACAAAAGCTGGTGTAACTG  
 AGTCAGGCTTGTAGGCTCCTTGTCTGCACACACTTTTTTAGTCTGCCACAAATTTCTATGGGATTTAGGTCAGGGCT  
 TTGTGATGGCAACTCCAATACCTTGACTTTGTGTTCTTAAGCCATTTTGCACAACCTTTGGAAGTATGTTTGGGGTCAT  
 TGCCATTTGGAAGACCCATTTGCAACCAAGATTTAATCCTGACTGATGTAATGAGATGTTGCTCAATATATGACACA  
 TAATTTCTCCTCCTCATGATGCCATCTATTTTGTGAAAGTGCAGCGAAGCACCCCAACACATGATGCTGCCACCCCGTG  
 CTTTATGTTGGATGTTGCCACCCCGTGCTTCAAGGTCGGCTTGAAGCCTCCCCCTTTTTCTCCAAACATAACGATG  
 GTCATATGGCCAAACAGTTTTATTTTGTTCATCAGACCAGAGGACATTTCTCCAAAAGTTTCGATCTTTGTCCCAT  
 GTGAGTTGCAACCGTAGTCTGGCTTTTATATGGCGTTTTTGGAGCAGTGGCTTCTTCTTGTGCTGAGCAGCTTTCCAGG  
 TTATGTGATATAGNNNNNNNNNNNNNNNNNNNNNNNNNNNNNNNNNNNNNNNNNNNNNNNNNNNNNNNNNNNNNNNN  
 NNNNNNNNNNNNNNNNNNNNNNNNNNNNNNNNNNNNNNNNNNNNNNNNNNNNNNNNNNNNNNNNNNNNNNNNNNN  
 NNNNNNNNNNNNNNNNNNNNNNNNNNNNNCCAGAGGCACTGAGTTTGAAGTAGGCCTTGAAATACATCCACA

GGTACACCTCCAATTGACTCAAATGATGCCAATTAGCCTATCAGAAGCTTCTAAAGCCATGACATCATTTTCTTGAATTT  
TCCAAGCTGTTTAAAGGCACAGTCAACTTAGTGCATGTAAACTTCTGACCAACTGGAATTGTGATACAGTGAATTATAAG  
TGAATAATCTGTCTGTAAACAGTTTGTGGAAAAGTTACTTGTGTCAATGACAAAAGTAGATGTCTTAACCCGACTTGCCAA  
AACTATAATTTGTACAGGACATTTGTGGTTCAAACACAGATTTAATGACTCCAACCTAAGTGTAGTAAACTTCGGA  
CTTCAACTGTATATGCATGCATTGTGTGCATGTATTACATTGTGTTTCTCAAACAAATCCTGAGAGCCACACTCAGACCC  
GTGTTTGGAAAGTCGATTTAAGGCCTACTTTCCTGTAGATATTGTGTACAGGTTGTCTCGGTGAAGGAGGACAAAACGC  
AGCAGGTAAGTGCAGGCTCATCTTGACGTTTATTTATTTCAAATGAATGCCAAAATAACAAACCACGAGAATGAACGA  
ACAACCAACAGTCTGGCAAAGCATAGGCTCAACACAGAACAATCACCACAAAATAACAAACACACCCCTCATATATGGGAC  
TCTCAATCAAAGGCAGATAGACAACACCTGCCTTCACTGAGAGTCCCAACCCCAATTAACCAAAACATAGAAAACAGACAT  
ACTAGACAAATCATAAGTAACCTGAAAACCAAACAGTGCACAAAACCCCGGAATACTTAACCAAAATGCCCTTCAACA  
AAACACACCACCCCGAACCAATAAAAACGAATACCCTCTGCCACGTCTGACCAACCTACAATACCAATTAACCTTATAC  
TGGTCAGGACGTGACATATTGGCTGTGTCGAAATCTGTCTTGCCTACTACTTACTAAAATGCATACTGTGTACTAATC  
GTAGTACATACAATTTAGAACATACTGTTTGGTCAAATCAAATGCAGTAAGCAACACATTTCAACATTTGAGGCTCATCC  
ATATTGAGAATGCTCATCTAGTGCATATGCACAATTGCGTTCCGCTATCTGATTATCAGCTGTTATGAAACACACTT  
GGTCTCGAAAGACGATTTCTCTTCCATAAGTGTGCAGAGAATTCACTAGAGGAAAAGCCAAAATGAATATGACAGCA  
TTTCCCAACTCTGTCTCGGACCCCAAGGGGTGCAGTTTGTGTTTTTGCCTAACACTACACACTTGATTTCAAACGA  
TCAAAGCTTGATGATTAGTTGATTATTGAGTCAGTGTGTGCCAGGGCAACAAAAACAGGGTCTGGACACCCAGCG  
AGTATGAAATCCTGGCATTAAAGTTGTCAGCATTACCGAAGTCTCCTCTCCTTGTTCGGGCAGCGCTCGGCGC  
TCGGCGTTGCGGCTTCTAGCCATCATCGATCCACTTTTCATTTCCATTTGTTTTGTCTTGTCTTCTCACACAACCTGG  
TCTCAATTTCCCTCATACATGTTGTGATTTAACCCTCTGTTCGCCCATGCTTTTGTGCGAGAATTGTTTATTGTAAGT  
GCATGTGCGCGACGGTTTTGTACCATTGTGTTGTTGTTCTGGTTACCGGTGGTTTTATGAATAAACTGCTCTGTTGA  
TTACCAAGTTTGTCTCTGCACCTGACTTCCCTGCTGCCAGTTAGGCACTCCCTTACAAAAGTATACAAAATTTATCA  
CATAGGCTTACTACAAAACCTTGATTTCCCATACCCAAAATGCCACTATTAGCAAGAATGGGTATTCGGACATGACC  
AATGCTCAGATTTTTTATGGCATAAGGAAGTACTCAGCAGACACTAGGCTGCGTTCAATATGACACAAATGATGTGCAA  
TGTTCAAATTGAACGAAAAGGTGCTGTCTGAGTGACCAGTTGAAAACCGGGTGGGGAACCTGTGAGCATGGCCACT  
GCTATTTAAATACGTCATGCATTGTTCAAGCCAGACCAGCCACACCACGAAATGGAGCAAATAAAATAAAATCAACAT  
TTATTGACCAAGTACACAGCTTTGTATATATACAGTGGGGGAAATAAGTATTTGATTCCCTGCTGATTTTGTACGTTT  
CCCGCTGATAAAGAAAGGATCAGTCTATAATTTTTAATGGTAGGTTTTATTTGAACAGTGAAGAGACAGAATAACAACAAAA  
TATCCAGAAAACCGCATGTCAAATAATGTTATAAAATGATTGCAATTTAATGAGGGAAATAAGTATTTGACCCCTCTCA  
ATCAGAAAAGAACTGTCTCCAGGTGCTTTTTTATACAGTACAGGCTGAGATTAGGAGCAGTCTTAAAGGGAGTGC  
TCCTAACCCGAGCTTGTACCTGTAAAAATGACACTGTCCACAGAAGCAATCAATAAATCAGATTCCAAACTCTCCACC  
GTGGCCAAGACCAAAGAGCTCTCCAAGGATGTCCAGGACAAGATTGTAGACCTACACAAGGCTGGAATGGGCTACAAGAC  
CATCGCCAAGCAGCTTGGTGAGAAGGTGACAACATTTGGTGCATTTATCGCAAATGGAAGAAACACAAAAGAACTGTCA  
ATATCCCTCGGCCGTTGGGCTCCATGCAAGATCTCACCTCGTGGGGTTGCAATGATCATGAGAACGGTGAGGAATCAGCCC  
AGAATTACCGGGAGGATCTGTCAATGATCTCAAGGCAGTTGGGACCATAGTCCCAAGAAAACAATTTGGTAACACACT  
ACGCCGTGAAGGATGAAATCCTGCAGGCCGCAAGTCCCCCTGCTCAAGAAAGCACAATACATGCCCGTCTGAAGTT  
TGCCAAATGAACTACCTGAATGATTGAGGACAACCTGGGTGAAAGTGTGTGGTCAGATGAGACAAAATGAGCTCTTGT  
ACATCAACTCAACTCGCCGTGTTTGGAGGAGGAGGAATGCTGCCTATGACCCCAAGAACCACCTCTCCACCGTCAAACAT  
GGAGGTGGAACATTATGCTTTGGGGGTGTTTTTCTGCTAAGGGGACAGGACAACCTCACCGCATATTGACGGGGCCA  
TGTACTGTCAAATCTTGGGTGAGAACCTCCTTCCCTCAGCCAGGGCATGAAAATGGGTGTTGGATGGGTATTCCAGCAT  
GACATGACCCAAAACACATGGCCAAGGCAACAAGGAGTGGCTCAAGAAGAAGCACAATTAAGGTCCTTGAGTGGCCAAG  
CCAGTCTCCAGACCTTAATCCCATAGAAAATCTGGGGAGGAGCTGAAGGTTGAGTTGCCAAACGTCAGCCTCGAAACC  
ATAATGACTTGGAAAAGATCTGCAAAGAGGAGTGGGACAAAATCCCTCTGAGATGTGTGCAAACCTGGTAGCCAACATC  
AAGAAACGTCAGCTGTGTGATTGCAACAAAGGTTTTTGCCACCAAGTACTAAGTCAATGTTTTGTGAGGGGTCAAATA  
CTTATTTCCCTCATTAATAATGCAAAATCATTTTTATAACATTTTTTACATGCGTTTTTCTGGATTTTTTGTGTTATTCTGT  
CTCTCACTGTTCAAATAAACCTACCATAAAATTATAGACTGATCATTTCTTTGTAAGTGGGCAAACGTACAAAATCAGC  
AGGGGATCAGATACTTTTTTCCCCACTGTATGCAGTGCCTTCAGAACTTTACAATTGTCTCATTCATCCCCCTCCTC  
TCTCCTGTAACATTTCCCAGGTTGTGCTGTAATGAGAATGTGTTCTCAGTCAACTTACCTGGTAAAAATAATGGTAAA  
ATATTATTTATTTTAAATATGCATACCCCATGACTTATCCACATTTTGTGTTTGGACAGCCTGAATTTGAATTTGGATT  
AAATCTGTTTTTTTTTCTACCCATCAACACAAAACCAATAATGACAAAAGTGAAAACACTTTTTTCAGAAAATTTTGCACAT  
TTATTGAAAATTGAAATACAGACACATCTCATTTACATAAAGTATTCACACTTCTGAGTCAATACATGTTCAAATCACCTTT  
GGCAGCAATTACAGTTGTGAGTCTTCTGGGTAAGTCTCTAAGAGCTTTGCACACTTGGATTGTAGAATATTGACACATT  
ATTCTTTTTAAATTTCTCAAGCTCTATCAAGTTGGTTGTTAATCATTTGCTAAACAGCATTACAAAATCTTGCCATGGA  
TTTTCAAGCCGATTTAAGTCAAATTTGTAAGTGGCCATTGAGGAACATTAATGTCATCTTGGTAAGCAGCTCCAGTGT  
ATATTGGCCTTGTGTTAAGGTTAATGTCCTGCTGAAAGGTGAATTTGTCTCCAGTGTCTGTTGGAAAGCAGACTGAA  
CAGTGTTCCTCGAGGATTTGCTGTGCTTAACCTAATCCGTTTCTTTTATCCTAAAAAACCTCCTAGCTTCTTGGC  
GATGACAAGCATAACCATGATGCAGCCACCACCTGTTAATGTGTTGGATTGTTGTTGTTGTTGTTGTTGTTGTTGTTGTTGTT  
ATTTCAGTATTACTTTAGTGCCTTGTGCAAACAGAAATGCATGTTTCGGAATATTTTTATTTCTGTACAAGCTGCCTATTTT  
TCATTTCTGTCATTTAGGTTAGTATTGTAGAGTAACACNNNNNNNNNNNNNNNNNNNNNNNNNNNNNNNNNNNNNNNNNN  
NNNNNNNNNNNNNNNNNNNNNNNNNNNNNNNNNNNNNNNNNNNNNNNNNNNNNNNNNNNNNNNNNNNNNNNNNNNN  
NNNNNNNNNNNNNNNNNNNNNNNNNNNNNNNNNNNNNNNNNNNNNNNNNNNNNNNNNNNNNNNNNNNNNNNNNNNN  
NNNNNNNNNNNNNNNNNNNNNNNNNNNNNNNNNNNNNNNNNNNNNNNNNNNNNNNNNNNNNNNNNNNNNNNNNNNN  
NNNNNNNNNNNNNNNNNNNNNNNNNNNNNNNNNNNNNNNNNNNNNNNNNNNNNNNNNNNNNNNNNNNNNNNNNNNN  
ATCTTCCCTCACAGTCTGTCTGCCACTTGTCAAGATGTCCACCATTGTTCTGTACACAGAAGAAAGGAAAGGCA  
TTCCACAGTAATAACCTCATAACCAATGGTCAAGCATGGGGTTGGTAGTGTGATGTTTTGGGGATGCTTTGTGCTTCCAGG  
ACCTGGATGACTTGCTTAATAGAAGGAACCATGAATTTCTGGTCTGTATGAGTATATTCTACAGGAGAATGTGAGGCTAT  
CCATCTGTGAGCTGAAGCTGAAGCGCAGCTGGGTCATGCAGCAAGACAATGATCCAAAACACACAATCAAGTCTACATGG  
AAATGGCTAAAAGCAACACATTTGAAGTTTTGGAATGTTCTAGTCAAAGTCCAAATCCCAATTGAGATGATGTGGCAGG  
ACTTGAATGAGCAGTTCATACTTGAAAACCCACAATGTGCTGAGTTAAAGCAGTTCTGCATGTAAGAGAGGGACAAA  
ATTCATCCACAGCGATGTGAGAGTCTGATCGACAACACAGGAAGCAATTTGTTGTCAGTCTTGCAGCTAAAGGTGGCAC

AACCGTTAGAGTGTAAAGGGGAAATTAACCTTTTCCACACAGGGACATGGGGTGTGCATAACTTTGTTTATGAAATAAA  
 TTAATAAAGTATGTAATTTGTTGTGTTATTTGTTCACTCAGGTTCACTTTATCTTTTATTTATCAGGTTTTGGTTGAAGAT  
 CTGATAACATTCGGTATCAAAAATATGAGAAAATAGAAAAGGGGGGCAAACTACTTTTACGCACCTGTCAAGTGTCAAGT  
 TGCAGCGGGTAGGACGAGTCAGGCGCAGGACACAGAACTAGGTAATAAFAACTTCCCTTTACTCGAATAAAAACAACAAAATC  
 ATTTCCACGCAGGGAAACACACCAGCTCACAGAAATCTCGACCCTTAAACAATGAACAAAACACGCACAAAACCATGGGGA  
 AACACAGAGAGTTAAATATTTGAAACTAGGTGTGTAAAACAAAGACGAAACAAATGGAAAATGAAAAGTGGATCGGCAATGG  
 CTAGAAGACCGGTGACGTCGACCGCCGAATGCCGCCGAACAAGGAGAGGGATTGACTTTGGCGGAAGTCTGACTAGGA  
 TGAGCCATGACTAGAATACAGTATATACATATAAAAATGGGTAAACACAGTATGTAACATATTTAAAGTGACCAGTGTTC  
 ATGATTTCTATATACATAAGGCAGAGGTCTCTTAAGGTGACGGGTAGTGTTCCTGGTGGAAAGCCTGTAGTCTAAGAAGTG  
 CAGGGTAGTGTTCCTGGCGGTATCTAAGAAGTGAAGTGTATGGGGCGATAGTCATTTAGTCCGGTTACCTTCCCTTTCTT  
 GGGTACAGGAACAATGGTGGACATCTTGAAGAAAAGTAGGGACAACAGACTGGGATAGGGTACGATTGAATATGTCAAGTAA  
 AACTCCAGCCAGCTGGTCTGCACATGCTCTGAGGATTTGGCTTAGGATGCCATCTGGGTGGCAGCCTTGTCAAGGTTG  
 ACATCATTGAATGTCTTACTCATATCGGCCACAGAGATCGGGAGCACACAGTCTTGTGGTGGCTCTGTGCTGTTTTCC  
 TCGAAGCAGGCAAGAAAGTGTAAAGCTTGATTGAGGATCGGTGTCTGCGACGTACCTCAAAGTCTGTTCAAGAACATTG  
 AACATTTTGGGAAACATGTCAATTCAGTACTAACCGTCCAGCAACGTAGCAAACATTTAATCAAACCTGAACACACTTTAG  
 TAGAGCAGCCTAAATCAAAATTAAGTTTATGCAACAATCTTACGTAAGGACTGTTAGGTCTTCTGGAATCTACGACAA  
 GTGTGGAGATGTTCCACTCAGAAGCGTAGAGGCTAAAGTGTACAGTATGCTACACGTATGCCAAAGTTATGCATCTTCT  
 GTTGCAGACCAGTTTTAAAACAATGCAATCACTGCTTACTGGTGTGTGGTTCATGAAAAACGACCCAGCACACTAC  
 GTTATCAAATACAGAGCCATAGCCAAACAGCAAAGTGGCCTAATTTAATTCCTAACGCTTAAAACCTAAGCGGAAAAACA  
 GATAGGTCATTTAGCTACAAAACAAGAAGCTCCAGCCGATTCAAACCTCAATGAACAGCATTAAATGAACAGCACTTACC  
 TTTCTCTGTTGAAATAGATGTGATGATGGCATTACCGTGGATCAGGTGATCCTTCGGTGTGATCGCCTTGTCTAGCAATCA  
 AAAACCAAAGAGAAACGTTTACTTGTAGCCTCTTTTTTATCAAACAATAAAACCCAGAATATTCAGTATTCATCAAATC  
 ACCCTATGGGACGGCAGCTCCTGGTCAGCCACGCCAAGCTCTTCTGTTCTGGCACCCGAAAGGTGGAACCCAGCTTC  
 CCCCTGAAGCTACGACAGCAGTCTTCCGAAAACATCGAACCCCCCCCAAAAAAATATAGAAAATATACAGTTGAAG  
 TCAGAAGAGTCATTAACACTTGTTTTTCAACCCTCCACAATTTCTGTTAACTAACTAAAAGTTTTGGCAAGTCCGTTA  
 GGACAACACTTTTGTGCATGACACAAGTAACTTTTCCAACAATTTGTTTACAGATTATTTCACTGTATCACAATTCAGTG  
 GGTCAAGATTACATACTAAGTTGGCTGTGCCTTTAAACAGCTTGGAAAATTCAGAAAATGATGTGATGGCTTTAGA  
 AGCTTCTGATAGGCTAATGACATCAATTTGAGTCAATTTTGTGATGTGACCTGTGAATGATTTCAAGGCCATCCTTCAA  
 CTCAGTGCCTCTTTGTTGACATTCAGGAAAATCAAAGAACTCGCAAGACCTCAGAAAAAATGTAGACCTCCCC  
 AGTTCATCTTGGGAGCAATTTCCAAACACTGAAGTTCCACTCATCTGTATAAACAATAGTACGCAAGTATAAACA  
 CCATGGGACCCAGCTCGTCATACCCTCAGGAAAGAGATGCGTTCCTGCTCCTAGAGATAAAGCAGTATTTTGGTGGCAA  
 AAGTGCAAAATCAATCCAGGACAACAGCAAAGGACCTTGTGAAGATGCTGGAGGAAACGGGTACAACAGTATCTATATCC  
 ACAGTAAAACAAGTCTATATCGACATAACGTGAAAGGCCGCTCAGCAAGGAAGAAGCCACATAAAAAGCCAGACAACGG  
 TTTGCAACTGCACATGGGACAAAGATCGTACTTTTTGGAGAAAATGTCTTTGGTCTGATGAAACAAAAATATAACTGTT  
 TGGCCATAATGACCATCATTATGTTTGGAGGAAAAAGGGGAGGCTTGAAGCATAAGAACACCATCCCAACCGTGAAGC  
 ACGGGGGTGGCAGCATGATGTTGTGGGGTGTCTTGTGCAAGGAGGACTGGTGCACCTCACAAAATAGATGGCTTCTATG  
 AGGAGGAAAATTTGTTGATATATGAAGCAACATCTCAAGACATCAGTCAAGAAAGTTAAAGCTTGGTCTGATGAAATGGGT  
 CTTCCAAATGGACAATGACCCCAAGCATACTTCCAAAGTTGTGGCAAAATGGCTTAAAGAACAAACAAAGTCAAGGTATTGG  
 AGTGGCCATCAGAAAGCCCTGACCTCAATCCCATAGAAAATTTGTTGGCAGAACTGAAAAAGCATGTGTGAGCAAGGAGG  
 CCTACAAACCTGACTCAGTTACACCAGCTCTGTGAGGAGGAAATGGGTCAAATTCACCAACTTATTGTGGGAAGCATGT  
 GGAAGGCTACCTGAAACGTTTGACCAAGTTAAACAATTTAATTAAGGCAATGCTACCAATACTAATTTGAGTGCATGT  
 AAACCTCTGACCCACTAGGAATGTGATGAAAAAAGGCTGAAATAAATCATTCTCTCTGCTATTATTTCTGACATTTAA  
 CATTCTTAAATAAAGTGGTATCTTAAGTACCTAAGACAGGGGATTTTACTAGGATTAATGTCAGGAGTTGTGAAA  
 AACTGAGTTTTAAATGATTTGGGTAAAGTGTATGTAACCTCCGACTTCAACTGTATGCTGAAGAAAATATAAACGCAA  
 CATGCAACAATTTCAAAGATTTTACTGAGTTACAGTTTATGTAAGGAAATCAGTCAAGTGAATACTTTTCAATTAACCCCT  
 AATTATGGATTTACATGACTGGGAATAGAGATATGCATCTGTNNNNNNNNNNNNNNNNNNNNNNNNNNNNNNNNNNNNNN  
 NNNNNNNNNNNNNNNNNNNNNNNNNNNNNNNNNNNNNNNNNNNNNNNNNNNNNNNNNNNNNNNNNNNNNNNNNNNNN  
 NNNNNNNNNNNNNNNNNNNNNNNNNNNNNNNNNNNNNNNNNNNNNNNNNNNNNNNNNNNNNNNNNNNNNNNNNNN  
 ATTTTGCATAGAGTGTAGCTGTTGATATGGCCTGGGAATGTGTCCCACTCTTCTTCAATGACTGTGCAAAAGTTGCTGG  
 ATATTGGCGGGAACCTTCAATCCAGAGCATCCAGAACATGCTCAATGGGGGACATGTCTGGTGTGATGCAAGCCATGG  
 AAGAATTTGTGACATTTCAAGTACCAGGAAGTGTGAACAGATCCTTGCACAGGGGGCTGTGCTTTATCATGCTGAAACAT  
 GAGGTGATGGCGGTGGATGAATGGCAACATTGGAGGAGCTTATGGTGTAGAGAAATGAACATTAATTTCTTAACAGCTTT  
 GGTAGACATTTCTGTTGTGACATGCCAATTTGCTTCTCCCTCAACTTGAACATCTGTAACGTTGTGTGACAACCTGCACA  
 AAGTGGCCTTTTATTTGCTCCAGCACAAGTTCACCTGTGTGCTGATTTATTGATATCTTAACAAAGGAGAAATGCTCACT  
 AACAGGGATGTAACAACAAATTTGTGCACAACCTTTAAGAGAAAATAAGCTTTTTGTGCATATATTTTATATCCGCTCATGAA  
 ACACCTTTGCATGTTGCGTTTATATTTTTTGTTCAGTGTAAAAAAGGCGCCTTTTTTTGAAACAAACACTT  
 AAGTCTTTTCCCTTACTAACTCTGACTTTTCTGATAGCTACTTTGAGGAAAAATGTACCTACCATGACTGTGATGTGG  
 TTATCCAACCTAGTTATCTTATTACTGCTGTTACGAATCCCTTTGGCCAGCGGTCTAGGGGGGGGATGGATACGAGACC  
 CGTAACATAAATCACGCAAAATATAATCGTGACAAGTAAACAGTGAGAACCAAAAAAACCCAGACAACCTGAAATCTACCG  
 TCAAACCTCAAAGGTTTATTTTAAAAACACACGGTAAAGGGATGTGGGAAAAGGGCTGAGTTGGACCCAAATCAAAGAAA  
 CAATAATCAAACAAACCCCTAAACTAGACAAACCTATTTCCACAACAGCTAACTAAAAATACAGAGGTGGTCCGCCCA  
 GTTCTAACTAGGGTACTTAGACACAGTATTTCTACGGGTAATGTATGCCATGGGCGACTTGTCTTGGTACCCCTTTTCT  
 CCACCAAAACAAACAAACAAACTACTCACAGGATACCGGCAAAATGTGACATGTAGTTGCAAAAAACAAAGGAGATC  
 AATACAGAGAGACACAGGGAGATAGCGATTGGACACAAGCGCAATTGAGAGAATGAACACAAAGATTGATCTGGGGAG  
 AAAACAACCTGACTGGGTTTTTAAACCAAGGAAAGGGCTGTGATAGGTTGAGGAAAAGGAACAGGTGCTTCTGATTG  
 GGGACTGATTGATGACTGATTGGGGAGTGTGATTTGTACCTGTGAGGAGGAGAAGGAGAGAAAAGAAATACAAATACAG  
 GATACAACTACCTGTATCCGTAACAACCTGCAGTGGCTTAATCAGGGTCCACACAGTGTCTTGTGTTGGTTTTAAACAAA  
 TCAACTTTGAAACAAAAGTATACACCTCACACACATGGTTATGGGCTTAAAAAATAAGACACCTATACCATGTCCAATA  
 AAGAGTTGAAATGTATTCAATTTTGTGATTTGCATCCCCAAATACACATATTTACTGTACATCACAGAAGACTGAAATA  
 ATAACAACATTTGTTGACATAGAAACACCATATTTATTTTTTGGATTAATTTATGAAAAAATATGAATAACATTTCCA

CCCTTGAGGCCACTAGGTCATTTGACTGCAGGAAAGGGGTATGATGAATGCACTAACTGTAAATCGCTCTGGATTAGAGT  
 GTGTGCTAAAGGCCAATGTAATTTGGTTATGACTCTTATTTTCATTTTCATGACAGTCTTCATCAATAACCATTGGTTAC  
 CCGGTATTGTGCCATGCAGCCCTAATCATAAAAATATATACAAACGTTTACACTGCCAGGGATCACAAACCTACAC  
 AAACAAATTAATGACTAATGACTGGCTGTCTTGAATCTAGTACGGTGCCTACTAGATTCTACAGCCAAATTCATATAT  
 TATTTATTTATTTTTTGTCTTTTTAGTCTTAATTTAAGGTTGGGGTTATGCATACGGTTAGCAGTGTGGTAAAGGTTAGGG  
 TTAAGTCTATTTTTAATTAAGAGAAATTTAGAAATGGCGGAGTTTACGACTTTGTGGCAACTAGTGACGGTCCCAGCG  
 AACGTTTCATGAGAAGTCTCGCGCTATTCAGGCCGTCGCTGTTTAAATGGCCGCCCTTACTCGAAGCAATGTCTGAAAC  
 GGGGAATAACACAAGGAACCCATCGGGGTGTGATAGCTGACCGGGAATTAACAAAAACTGCGGGCATTTCCTCTCCTAA  
 ACGGTTTCCGAACGGATGGGCAGTGTGGGGGGATTTGCCAAGCGACATAAGATACGAAAGCGATATAGGTGGCTAGCGGG  
 AGAGGAGAGAGCTGCTAACTAGCTAGTCAACACAGTTGCTACTGCCGGTGGAGCAAGCACCAGCAACCTGACAAGAGT  
 GGGTTTGACGAGGGTGGGAACACAGACTGTTGGACTGGAGCGTGTGACTCTTGGCACCAATGCTAACATGAGTGGACCT  
 GGGCAGGATAGCGAGCCAGAGGCCAAAAGTCTCCTCATCAAGCGGCTATACAGGTGAGTCAAATTCCTTTTGTCTGGGAAA  
 CATTACATTAGCTAACTAACAGTAGTAAAATAAATGAAAAGCTAACCTTAGCTAGTTTGTAACTAACTAGCCATCTATT  
 CAACTTGCTAGTTAGCTAACTATCCAGTCACCTGTGTCTGTGACTTGCATCAGTTAACGTTAGCTAGTTAACTGTACT  
 TGTACGAAGCCTTCGTCGAAGGACTATGACATTTTTACGAAGTAGTTCGGACATTTTCGATAATATGGGTTTTAAATAAC  
 CAGATGTAGCCAGTGGGAACCTTATGGAGCGGATAGCTAACTAACGTTAGCTTCTAAACAACAGTAACTAACAGTACAG  
 TAACAAGTTACTGTCTATTAGCTAGCTAACTTATCTGTGCCAAGTGTCTCTCTTAAATAACGTTAGTTGGTTAAGTAG  
 TTGTGACCGCTTCAGCTCGGTATTCGCACTACTAGTTACTTGTATAGGCCCTACCTTGTGCTAGCTACCTAGCT  
 AGTTAGTTATTTAACAGCTAAGATAACTAGAAGCGTCTTGAGAACATCAACATATTAATAATGTGACTGGCTACTTTT  
 AACATGCATAACTAGGCCAAGTTAGGGAGAAACACCATATTTACAAGCCTCTTTATATTTACTGAACGTTACCTAGTTA  
 GGTAGCTGTAATGCCAACCATATCTCAGTGTGAGACATGACATTTGATATTTCCAGTTATAACTAGCTAGCTAACATT  
 AGCTCCTACATTGATAAGAATGAGTTTGTCTATTCCTCCATTGACCATTACCAGTTATTCACATGCCATAATAACTGTAT  
 CTTGGCTGTCTAGGGCAGTGGTTGAGTCCGTACACAAGCTGGATGTCATCATTGGCAGCAAGTCATACACAGGAGGTC  
 TTCAAGCCTGAAAACATCAGCCTTCGCAACAAGTAAAGCATTTTACTCTACTCCAACCTTTGCCCTAAACACTAAGGCAAA  
 AGGCAAAAGCACTAACCCCAACCTTGTCCATCTTCTGTGCCAGGTTGAGGGAGCTGTGTGTGAAGCTGATGTTTCTCCAC  
 CCTGTGGACTATGGTCGAAGGCTGAGGAGCTTCTGTGGAGGAAGGCTACTACGAGGTCATCCAGGTCATCAAGACAAA  
 CAAGAAGGTACAGCATTTAAGGGTGTTTTCCCATATAGTCTCTTTAAATAACAAATCCCCGTCCTCTTAAAGTGAAC  
 TTTTGGTAAAAAAGAGCTATAGAACTATGTTCTCTTTGTATTACACTTCCCTTGCTTTTGAATGAAGACTCAACTCT  
 TTTGCCAGTTCACTTTATCCATGTTGTGGTCCAAGTCTCTTTGCATTTCAGATTGCTATATTTCAAAGGAATCAAGATA  
 TTTTTTCCAACATCTACTCAATGCCTCTGGGCAAGCCATTTCCATTCCTCGATCAGATTTTCCCAATGTCTCTTA  
 TAGCACATATCAGTGTCTTATACTCTTCTGTAAACAGGTCATCTCTGTATACCTGTTGCAAGACCCACTGGTTGATGC  
 TTATTTATATAACCCCTCACTCCCCACTATCTGAGATATCTACTGCAGTCTCATCTCCACATACAACACCTGTTCTGCC  
 AGTCACATTCTGTTAAAGGTCCCCAAAGTGCACACATCCCTGGGTCGCTCTCTTTTCAGTTCCGCTGCAGCTAGCGACTG  
 GAACGAGCTGCAAAAAACACTCAAACCTGGATAGTTTATCTCCATCTCTCTTTCAAAGACTCAATCATGGACACTCTTA  
 CTTGCAGTTGTGGCTGCTTTGAGGGATGTATGGTTGTCTTACCTTGCTCTGTGCTGTTGTCTTGTACCATGTTTGTG  
 CTGCTACCATGTTGTGCTTCTGCGGTGTTCTTGTCTACCATTGTTGTTGTCACGTGGTGTGCTACCATACTGTGTTGTCAT  
 GTGTTGCTACAATGCTATGTTGTTGCTTAGGTCCTCTTATGTAATGTTGTGATGTGTGTTGTTGTTTAAATG  
 CCAGTCCCTGTCCACGCGAGGAGGCTTTTGGTAGGCTGTCATTGTAATAAGAATTTTGTCTTAACTGACTTGCCTAGT  
 TGTTTAAAAAATATATATATATATACACACTCTGCAGATTAAGAATGCTGTAATGAAAATTTGTTACCCAATGTA  
 GGCTGCTGCCCTTTAAGAGCTAAAATAGATTTGGACCGTATGTTGTGATTCTCACCAATATGTTGTCTTCTCACACTT  
 CAAACCCACAATCAATAAACAGCGTATGAAACGCTCTTATAGATCACAATTTGCAACAAAATAATCTGAACTAAAAACA  
 TTTTGGAAATATCTGTGGGTTCTTGACAAAACGCTAATCAATATCCAAAAAACGGCACATTTTTTTCTCTGCAACCTGC  
 ACATAATCTTCTACTTGTGGCGCCATGTGAGGGTTACGGCAGTGTGTCAGTAGTGTGTAATCACAAAGCGAACCTGG  
 GGACCATTAACCTAAAAAATGGAACCGGAGCAGGAAATTCAGTAAACCGAACTCAAACCCACTCTGGAGACCTCTCAG  
 TTCGTTCTCGGGGCTCTTTTGGGGTCCGAGTTCTTTTGTAGTGTAAACATGGCACAAAACATTATGCAAAACAGCACT  
 GAGTTCACAAATTTGCTAAAAGGGACCATGTGGGAAAACACCCTAAGTTATTGGGGAAATTTTATGACTGTGGCCAGTAC  
 AGTGTCTTACACCTGAATTACTTGTGTTTGGGGTTTTAGGCTGGGTTTCTGTACAGCACTTTGTGACATCAGCTGATG  
 TAAGAAGGGCTAAAAATACATTTGATTTGATACAGTACTGCTGAGCTTTCTGACATGCCCACTTTCTTTCCTCATGCC  
 TACACAACCCCTTTATTTATTTCTAATCTCTCTTATTACATGGCCCCGCTTATATCTCCATGTCTTCTACAGACA  
 TCCACAGTCCGAGTCCCTGGAATGTGCTACAGGACTCAGCTGATAGCCGGGGTGGGTTCTTCCAGCACCCTGTGCTC  
 TACATCCAGTCCCCTACCAGCTGGAATGCAGGACTGCATCGACTGGACCCATGTACCCGACCCCTCATCGGTGAGAC  
 ACACACACACTTAGGTCAGCGGTATCTGTGATTGACACAGTGTATAAATGATTGTATTTGTTTTGTAGGACGGAAGA  
 AGCCGGTATCAGCCACCCCTAAGGAGATGGAGTGGGCCAAATGGCCTGCCATCGCTGCCCTGGTGTACCTGGGAGATCTA  
 GGTAAATACAACTTTTAACTTTCTCACCAAAGAGATTTGAGACAACCTTATTTGTATGACTATGGAATTCGATTCACCA  
 AATGCAAGGTCACATTGATTTGAATGTACAGGAGAGGTTTACGGGAGGTTGTTTGAATGTTTTCTGCAGCCCGTTACCAG  
 AACGAATTTGGCTGGGGTGGAGGCTGAGCAGTGGCAGAGCGGTTCTACCACAGGCCCTGTCTGTCACTCCGCACGTAGG  
 TGAGTTGACAACAAGGTGTTACCGGCCCTCCCTTTCCAGCAGCATTTAAACACCGTTTTTTTGTTTTACACTAACCGGTTTA  
 CTCACACCACCTCTACAAATGAATCACTCTTGTATATTTCCCACATAGTGTGAACTCACACAGCACTTATTGATTGA  
 GCCTTATTATATCACTGGTCAAAGCTTTACGCAGCTCATAGTGTACTAGCTGAACGTTAGCGGGCCATTTGGGCCAGGA  
 AGGGGCATTACGTAATGTTAGCGGGCCAGGAGAGGGCATTAGTCTCAAGAAATCACTGATCCACATTTCAAACGATC  
 TGTCTTTTGTAGAGGGCTTCAGAGGCTTCATCAGTCAAGTCAACATTAATGAGGCTCTGCTAAAGGAAAGCG  
 ATGTTGTTAGTGTGCCATGATACTGACAAGTGTGTTGATGTTTGTGTTTTCAGGAATGCTTTCAATCAGTTAGGTACACTG  
 CGGGGAGTAAATTTACAACGTCAGGAGCCACTTACTACTACGCTGCTGTGAGAGGAGACTTCAACATCTGTAGATTT  
 ACTGCAGCACATCCACAGTCTATCTATGACTGGTCTGTAGACTATGCTGTGCTATTGTTCTCTACCTCAGTGGGCAATG  
 TAGTCACACTGCTGGGAGAAATATATCTTTCATTGCAACAATTCATATTTGGATCACATTCAGTAGACTCTAAATAGGAG  
 ACATGTTTTGAAATGGAAGAGGTTCTGAAACCAGTCTGTTAGAAGGCGGCAACTTCGGAGCCAGAACATGAAAAAAA  
 AAGACTCACAAACAGTGGTACCGGATGATACCCTTGAATACTCGTTAGTAGTGGTAAGGATACAAACATGAAGCG  
 GATTTGAACTTCTTTAGGAAAACAGCCCCGATGTTGGAAAAGAAACATTTGTTGTCATCAGGTCACAATTTATTTCCAAGTT  
 ATAGCACACAATATTTTACATACAGCAGGTTTTTAAAGGACCAAGAGTTGGGCTGCTTCGTGTTTTTCATTGCCATGGA

AAAAAATATTGCCATACTGGTATCGTCAAACCCCTACCACCAAGTACTGATCATGGTTTTCTCCTCTATGTTCCCTTGT  
TGAACAGTATA CAGTCGGAGACTCCCTTCGAAGGGGCTATGGGAATTTGAAGCGTCTGTTTGTATAAGCTGCTAAGATG  
TACCACCAGGTGAAGAAAACAGGAGATGAAGAAGTGTCTCCCTCACGGCAAAGGTCAGTCTGGTTTTCCAGACCACAGC  
CCTGAAATGAAAAACACTAAGTCAGCATTGAAACATGAATTGAGATAGTCTCTTTGAGATCCTTACTGTTTTCTTCAAC  
TGTTTTCTCTCCAGATCCAAGGACATCAAGCAACTTCTAGTGAGCTTTCATGTACCTGCAGAGTCTACTGCAGCCCAAGAA  
CAGGTTAGGACTTTCATATTCACCATTTAGGCCCTAGTCATTTATCTCAATAGGAACCTCAACATTTTGTCCATATATG  
ACACAGCTATCTGATGATAATAACAATTGATTGAATTTTATAACCCCTCTGCTCAGTTCAAAGGGCTTCTATTGTC  
TGTTGGGTACCGTGTGTGAATGTCTTACCATTTCTCTCCCTGTGAGTAGTCTGCTGGAGACAGAGTTGACATCTCT  
GTGTCAATCGGTGCTGGAGGATTTAACTGGTGTGTCTACCTGCCCTCGCCGCCACACGGCCACGAGGCCACTTCCC  
CCGCGAGGAGGACATGAAGAGCAGACTCGCCCTGCGCCCTGCTCCCCGACGCCCTCGTCTTCAAGATGGTGGTCACC  
TGCCATCATGGTGGTCACAGCCTGAAGCGGGAGGTTAAGAAATATAGATGTCATGTATTTTTTTTGAAGAACACTCT  
TCAAACATTGCGCTCAAAGGATGTTGTCAGTAGGCATGCGAGGATAGTGACATACTGCAGGGGAGAAATAAGGGGATATG  
TTGTATTGCAAAGTTGACATGTTGACTTGTGTTGTGAGGGTCCAAGCAGTACAGTGCCTCAATAGCCTTACGCTGGCC  
TCTTCTCCCACCTGGTGAACCATGTCAACATCCGCCTGCAGGCTGAGCTGGAGGAGGGGAGAGCCAGGTGCCCCCGCTG  
CAGACCGACAACATAGGTGAGGACTACTCCCAGCTGACCTCATGATGCTTAGACACTATTCATGTTCTCAGTTAATCCTC  
TGAAAAACAATAAGGAAATAATGACATTTGTTTGTCTTAGTAGACTCTGAGTTGAGAGACCCGCTGACCCGTTGACC  
TCGGAAGAGAGGCCCTGCAAACGGCTCCCTAGACCATGAGGGGGGCCACCGAGCACCGTGGCCAGAAAGCAGTGGCT  
CGGTGAGCGGAAGGACAGAGGAGGAACCGAAGCAAAGAAAAGTACGCCCGCCTTCCATGCTGCCCGCCGCGCT  
GCGCCACCCGCAAAGAACGAGAGCGACCTGAGCGAGGGCTTCGAGAGCGACGAAGAGGAGGAAGAAGAACAGAGGGGC  
TGCGTTGACTCTGGGGCGCGCCTCGGGACCCCACTCACACCCCTCCAGCTGGGAAAGGAGAGCAAGAGCGGGAGGGA  
GCACCCGACAGAGGAGGGACCTGGGAGAGCGCCTCGGAGGAAGACGAGGAGGGGAGCAGGCCTTTGACGTGGAGACTG  
ACTCGGACATGAACAGCCAGGAGTCCCGCTCCGACCTGGAGGATATAGAGGACTCGGAAACCCCGGAGAACTTGGACACA  
CCACCTCGGGGGAGGTCAGCCTGAAGACGACGATGAGGAGGACGAGCAAGCCGATCCCAGGAGGACGAGGACCG  
GGACCCCTCCGGCCACCAACCGCCCTCCTGCCAGCAGCCAGTATCAGCAGTAACCTCCAGGCACTGATCCCTC  
AGCTGTTCCAGGCCAAGCGTGTCTCCGCTGGCGCCACCTTCAGCAACGTGCTGCTGAGGCCACAGGTCCGCCACC  
AATCCACACCCACCCACCGACCCAGACACCGCCTCCACCACCCCTCCAGGAGACCCCTCCTCCCCGGGGACTC  
ACCCTGCGACGCTGGCCCCGCGACTGCCAATGGAACCAACGACAATGGTCAGTAACCTGCCACACACATTTGACGCTGTG  
TTGATTACTATGTGATTTTTGTATAGTGCAGGATATGATGAGTTTAAAGATTTAACTTTAGTATACCAATATAATTATGC  
ACTTCTAGTTGTTTTGTCTTTCCCAATGACTCCATGGAGTAAACAGCACATCGCTAAAAATAGCCCTTTCTAACAGT  
ACATTTGAGTAGCCCTTAAGAAAATAGGGTGATAGTTAAACCCATGTTTCAATTTCTTTATTTGCTTCCCTGATGAG  
GTGGATTCCGATTCCAGAGTGTAGCGTGCACAGCAACCAATCAGTACACAGCGAGAAGACCTGTCCGAGAGACTGGAGAT  
TCTGACCGATCAGGGGCTCATCCAGGTGGTCAAGGTGTTTGTGGATTGGCTGAGAACCACACTGACATTTATCGTCATGT  
GTGCACAGGTAAGGGGGTGGATTTTACTAACC TAGAACCACTTACAAACAGTATGCATTGACAAATCTAATTTGCAT  
CAAAATGGTAAAATAACAAGTTAGTCTTTGTATCAGCTGAGTCCGGACAGGATTTATAGTCTTCCATCATGTTGGTGT  
GTTTCACTGTCCATCTCCGCTCAATGTAATCCGTTACTGCTGTGATAGGTTCTCAGAGCCTATGGAACAGACTGTCT  
GTGCTACTCAACTGTGCTGACGGGAGCAAGATGCTGGAAGCAGGCGAGTTACTAAAACTACCTGTCTTTTATGGG  
TTGTTAATCTCGTTCATTTTTTTAATTAAGTACAGTCCGTTTGAAGCAAATTTCTATTTACAATGACAGCCAAAC  
CCTAACCCGGGCGACGNNNNNNNNNNNNNNNNNNNNNNNNNNNNNNNNNNNNNNNNNNNNNNNNNNNNNNNNNN  
NNNNNNNNNNNNNNNNNNNNNNNNNNNNNNNNNNNNNNNNNNNNNNNNNNNNNNNNNNNNNNNNNNNNNNNN  
ATGGTAACTAGTGGGCCACATTTAAGATATGACAACCACAAATGTTTCAATGTTGCTTAGCCTTTTATCCGGTGTGAACTCTAGAGG  
CAACAGTTCTTTGAAATGAAAAGATAAAGAGGGCGATTTTCAATGTTGCTTAGCCTTTTATCCGGTGTGAACTCTAGAGG  
AATGATACACAGGTCTTCTATATCAATGTATCTCTCAGTAACCGATTTTCAAATGTGCTGGCTGTTGGGGCCATATT  
GTCCTTACTTCTCAGATCTTAACAAAACAATGTTTCTAACCCATAACCCACTCTGAATCTGTGATCCAGTAACTAAGAA  
TAGGCTGCGACCAATATGGGCGAAGCACTTGATGTTGTAACCCCTCTCTGTCCTCTACCTCAGGTACATACGTT  
GCCAGAAGGAGTCAAGGAGGAGTTTGGAGAGGACAAACTGAAACGCCAGGACATTGAAGCCTGGTGGTCTCTTACAT  
GGCCACCTCTCAATACTTAGCATTTTATACAAATGCTTCAAAGTGGTAAAAGATTTATGAAAGCTTTCTACCAGCAGT

AAAACACCTTCCCAGTGTAACTGTTTCCCTTATGTGTCCTGATTTCTAGGCATCTATACAAGACGGTGGACAGCTGTCTGT  
 CAGCTGACCGTCTCCCAGAGCAACGGAGACGAAGACACCGGCTGGCATGGTCACTATTTCTACCCGGTCACTCAGTGGAGGA  
 GCTGTGTACCCGCTCTGCGCCCATGAAGGTACACACATCAAGAATAACAATCACTCACTCAGTTCCTTTAGGCTCTCCAGCA  
 ACCACTGTTGGTATGACAGCTGGTCTGACTTCTGTATTTCTGGTGTATCCCTTGGGTTGTACAGTATTGCTATTAAT  
 ATTTCCCTGTTATAAACTACTGCCATTTTACCATGGTGTAGATCTTTGTAGAGAACCAGAGTTCTTTTCTAAGAGAAGTTT  
 GGCATGTTGACCTCCCCATTCATCCTTACGTTGTATGTTTATTGGTGTAGAAAGTTGATGTCTTACCCTCCATTGT  
 CTGTGTCCTTGGTAAGTGGCCATCCAGGCAGTGGCGACAGCAGGCATGGAGCTGAAGAACATTGTGGAGTTCTACCG  
 TCAGTGAAGGAGATGGCTGAGAGCGTCCGCGGGGCGAGGTCGGCATGGCGGACAGCTGATCACACACTCACTCCCTCT  
 CTCTCTCCCCTCTGTTGCTCTGTCTGTATCTGCGTCTCCAAGGAAAATCAACTCTAGGAAAGGATGTAAGGGGGGAGAA  
 TGAGAGAGAGAGAGGTTGAAAAGTAAAGCAGTTGAAGGAAAGAAAAGCGAGACACATGGGCAAAGGGGGCAATAAGAA  
 ACAGCAGAAGACCCCAACATAAAAGAGCGATCCCAAGAGTTGGTGAAGATTAAGTGGGGATGCTACGCACTTAAAGTG  
 CCCCTGGTTCACATCATAACCAGGCATATACTGTTTATGATAGAAATGAGTACATTACGTGTCGAGAGAGAACCACACAT  
 ACACATTCACGCTCAGTTAAATCCATTGGTTTAGATGTATAGAGCAGTGTTCCTGTTTCTCTCTTCCCTCTGTGTTGT  
 GAAGTGGGACTATGTCAGCCCTATGGCTGGCTGGTCTGGTCTGCTAAGGCAGGGGGTGTGGGGTAAATCCCAGAGAG  
 AGAAAACGCATCTCTAGCGTGCAGCGTTGAGGCTATCGACTTTTCGGAGTCTCATAGCTCATAGGGTTCAGGTTAATG  
 GACGTACACTTCTCCAGGATGTTTCTTCTTATCAGTTTTTTTGTCAGTGTACTTTTTGTGTCCAGTGACTAATGTATT  
 GTGTTATCTGTGTATGATGAGGAGGAATGACGGGTGTCGCCCTGCTATGTTTAAATTTGGATTTTTTTGTACCCAA  
 ATATACTTTATTTTCGTTTTTGTAACTGTGCTGAATACACACAGGAATGAAGTGCAGGGGAGGGGTTGCTTT  
 GTATCGTTTTCCCTAAACCAGTCTGATAATCCTTCTGTTCTCAAAGAAAATAGTCTGACTTTTGTGTCTATGGTGTCTTTT  
 AGGAAGAGGTAGACTCGGGTGGGTCAGCTTTGTGCTGTGCTAGACGTTAAGGAGAGCGGGCCTGCGGCTGTCCCAATA  
 TGGCGGTACAAGGTGTTGTGTTTTGACCCCTGTGAACTCCTGATATATCCCATCTACCATCATCACTAAGTGTCCCAT  
 ATGCACAGTGCAGGAACTCTGTATATGTGTGTGGCCACGCATCAACAATAAAATGAACTCATTTTAAATGTGTTTTTC  
 TTGTTTTTACTCTCAAACCTTTACAGTGGCACTTTTTCAAAGCTTTACACAATTCATGACAAGGCACAGGACTCTCTG  
 AATTGGGAAAGCAACTATTTGAACCTGAACATACTCATGGCTGCACCCTTATGACAATAATAGCCATTGTTTTCAGTAAGT  
 TGAAGAATAATCCAGAGATGACGACTGACCAACATTAATAAGAAATAGTGTGTATCAAAATAGTCCGGGTAGCCATTTGA  
 TTAGCTGTTTCAAGACTTATAGTTGGGGGTAGAAGCTGTTGAGAAGCCTTTTGGACCTAGCCTTACTGCTCTGGTACC  
 GCTTGTGTTTTGGAAACACATTTAATGTTTTTAAATGTATAGGTTTATCCAAAGTTTCGAAACACCCCTTACCTATTGAAA  
 TATGGTAGTTCTGTCCACTTTCCCTGAAACTTCTCATTCTGAACCCGTTCAAGTGCAGCCTGGCTCATCCATCAGTCTC  
 GGTCACAGTGAAGGACTCGGTGTGCCATCTATCCTGCTCTCTCTGTTGTGAGGTCTCGTGATCCTCACTACCTGGAT  
 GCCTGGGCTAATGCCACCTTCTGCATGGCAGCGAGACCAATCCCTGGCAGCGGGGTGAGCCACCCCAAGAGAGA  
 AGATGGTTGGCACAGCACAGGGCTGCCCACTTTCTGGTGGTGGGAAATGAACAGTCTAGGGCCCGGTTTCCCTAAAGC  
 ATCTTAAAGCGAAGCAATGATGGCAAAAATGTGTGGAATTTTAGGAAATTTGGCTTTAAAATGAAAAATGTTCTCAGCCT  
 CATGGCAGCACTTTTTTCTTCTCTGCCCCGTGGCAGAAAGTGAAGAATTCAGGGAAATTCACTTAAAAAAGTAATA  
 ATAATATACAGTGTAGAATAGCATTAGGAAACAGATTTTTTTTTTCTTCTGACCATGGCAAAATGTGTTGAAATG  
 CACATTTTGGCAGAGGTCAAGTGCCTGGCCCCCTTGCCCTCAAATGCGGTAGTCCGGCCCTGGGGGTGCTGAGGGAGG  
 ATAAAAAGCTTAAACAAAGCATTGTTCAAAGTCCCTCAGTCCATGAAAAAAGGCCCTGCAATTTTCAATGTAGATTTGG  
 TTCAGTTTGAATATTTATGAAGTACCTGCCAGCCTTGCATTTACTGATGAGGATTTCTCAGGAAATTTAACTTTGCCAT  
 ATGATCATAGTATTTGAATAGGCTACAGATGAAAATCACCGTTGATATCACCAATAGTCTTTGGAGCTGTTTCAAATATT  
 ATGTAATGTGAAAAACTTTGAAATGTGACATTTTGATTAAGAAAATGTTATATAACTGCTGTGTCATGTAAAATAGAATT  
 ATGGGATGATATGGGATGCCTTAAGGCTTGTCTCTGCTTGTCTCTGATTCTCCATAACAATGTTTCTTCTTGTGCC  
 CATCCAATCAAACGTCGCTGTGTGACAGGGTGGGATTTTCGACATTTGGGGCTACGGGTTTGGCGGTGTTTTATTGCGCT  
 GTGAAGGAATGCAGGACATAGACGGTTTATACAGATTTACACCAGCCTCAAATGGTCAAGGATAACCGGATTTACGATGGG  
 ACTATAGTTTATTACAAGCAACAATGTTTCAATTTGGTCAAGTACATTTGCTCCAGTGAAGATTTGCGCTAATGAGCT  
 CACCGCAATATAAAGCTGAAAGGTTGACTTTGTTCTTCTTCTGCTTGGTCAAGTGTGTTGTTTACATTTGATAGGCTACT  
 GGATATGTATATTTGTACATGTGCCACGAGCGTGTAGGAACTGGAAATCCTGAAAATGTCTCCACGGAACCAGACT  
 TTTACAGTATTATGCAAAATATTTCTGTAGCCTATGTATCTTGTCTACTTAAAATATCATTTCACTTTTTTGTGGCATATT  
 TGCCTTTTTGTATTCAATTTATATTTGATGAAATTTGGCATTGTAGCCTGTCTGATGTTGTAGTGTGTTTTAGTCT  
 GAGGTGTGACAAATTTGACAGTCTCCATTGCGCCGAAACAAAGGCAATTTGCCTATAACAATTTTATTACAATGTGATA  
 ACAATATAGTAGGCTATCCGACATGAAAATGAAGACCAATAGTCCATGAAAGCAGATTAGAGATCCGAGTACACCTCTTT  
 CTTGGAAAGACAACATGCGTTAACGGCCACGGGGAACTTCTGGTCTTGTCTATTTTTGGCCCGCAGGACAGATAGTGT  
 TTTCTGTCTTGTATTGCAACAGTCCAGTGTGAGCGCTTCTTCACTCTTTCCAGGGTCTTCTGCGGACGGGCTGTGTAGG  
 GCTGTGCTACTAGAATAGACCAGACACCACCGGCAACCTTTGCGTTACTGGCCCAACGCTCTAACCACTAGGCTACCTGC  
 CACATCTCGGCACTTTTTAGGGAATATTGGCCCTCCACATGCCGACTCCCACGGTAAGTGTATTCTCTTGGGAAAAAT  
 AGATCCCAATCTCTACCAGAAAGTTCTCTCTGAGATTGTCTTTTTAGCCTGTGCCATAACTGAACATAACTGCTCATT  
 TATCTGTTTGTCTGTGATTGTTGTGTGTCTGCCTTTACCATTTCTCAGTATTAATGTCAATGATGTTGACTCCAGGCAT  
 TGTACATTTCTATGAAAAGGCAAAATTAATTTGAATAGGATTTAGTGTCTTTTGGAAACTGTGTCCAATTTGTGGATCT  
 CGTTTCACTCATGAACTATGCACTCAGCAATTTCTTCTTTTGGCAATGTTTCAATGTTGTAGACAACCTTCCAGCAATG  
 CATTGAATTTACCCCTCTGCCCTGCTCTGCCCTGGTACAGGGTGTAGTGCCATCTACAAGATAGGGCGAGAGACATG  
 TAGGACAGCTACCTTGCCCTACCTAGGCTACATGAGTTAAACATTTTCAATAGACCAATGTAGATCTCTTCCCTACATATC  
 TGGTTGGTCTGGTCTGCTGTTAATGCCACTCTATTGGGATGACAAGTTGTAACCTGTTCCATGTGACACTACGTTCTTCA  
 AGTTAATCACAGATTATCATAAGTGAATTTATTGGTTGACACCACACCTGCAGAAAGGAACTGTGTGACCCCTGTTAAAAA  
 CATGTGAAATGCATTTGTGAGATAATCATTCATCAGTTTGTAGATTGGTGAAGCAAGGTTCTGTTACGCTTTCAACAAT  
 TTATTCAATGTTGGTCACTGATTACAGGAAAGCAGCAAGAGAGGAAGGATGCCCTTAAAGAAAACAAAATCTTACTC  
 TTACTGAACATAACAGATGATATTTCAAATCCATGTATCACTAGCCTATAATAGTGTGAATTTAAAGTCTTCAACAGACAG  
 TGTTAATGAGTACTCCATCTGGGTCAATGGGAGGGTCTGATGGTAAGTTCAAGTATACATGGGGTTATTTGTTGGATTTT  
 TACCTTCTGCAGTACAGTACGGACATGAAGTGGTGAATCCTGTTGTTCAAGGTACACTTGACCATCAGTCAATTTGTGTG  
 TGTGAGGTGATGCTTCCATGTTCCATTACCAGTACAAAAGTGTACAGAATCATGCAGCTAGATGCAATGCAATGTTCT  
 ATGGGGCGAAGCATGTGCCTTGTCTTGTGTTGCATAAAAAGTACATGTGCCATGTCAACATTGCTCCCCACATAGACTT  
 CTTATGTTAGCTCCTGAGTTATAAAGTCTTCTATTGAGGAAGGTCAATGTGACGAGATCACGAGCCAGGAAAGCAATTC

AGGAGTTGGGCGAGAGAGTGAACAGAAAAGGGAAACGTGGGAGAGAAGCTGCGTATTCAGAAGAGGTGGGGTAAAGGG  
 GAGAGGGAGGACGGAGGGGGAAAAAGTGAATATTTGTAGATTTTGAACATGATGGTAGGGGAACGGGGATGGTCACC  
 GCCACTGGCAGTCACTCTATCTAGAGTGTCTGTTTTCCCTTGTTTGGCTGTATGTGGCAACCATTACCATGCTCTTGCCAC  
 ACAACAGACAAAGACGGACACTCAGTACACTTAAACAAACACCTCTGAGTGTAACTACTCTCACATTTCTGTTA  
 CTATTTTGCACAATTTGTATAGTATTTAGATAGAAAAGTCAAGATGATCAAGTCCCTTGCCAATAAATTTATTCAGAAGAGA  
 AATGTGTGCTACTGTGCAGAACAGCCTTGTGAGTGGTGGTGTAGTTGAGATTGGTGGTAGTGAGCACATGAAAAGTG  
 GTTGGCATCACAGAGTCCATGAGCAACACCTCCAAGACCTCCCGTTATTCGACTACAACAGAAATAGACCAACAGAATT  
 CCCATCTATTAGTTGATGGAGACAGTGGAGGAGGATGAGGGGAAAACGGCTCATAATAATGTCTGTGACGGAAACAAATG  
 GAATGACATCAAATGCATAGAAACCATGTGTTTGATACCGTCCCGCTGATTCGGCTCCAGCCGTTACCACGAGCCCCTCC  
 TCCCCAACCTCTGTGATGGAGAAGGAAATCTGAATGGGAAGGACCAGCACACTGTAGACACACCAGGAATCCAAAC  
 TGATATGCTCAGTTTACCATTGTTTTAGAAATCCAGGCTATACGTCTGTTATTCATAAGTTGTTTTACTGGTTGTGACAG  
 AACGTGCAGAGTTTTTTTTACAGTAAGCTGAGAATATCATCTATGCACTCATTGCAGTGCAGCTCATTTGCATGAGATCT  
 AATCAGATAGACCGGTTTGGACCATTACCAATCATCACCTGGTCACTTAGCAGATCTTTCCATAAACACGGACATGGA  
 TGCCAAATAGTTTTGTGCTAGGCAATTCAGATTCCAAGAGTTAACAAAATTTGGGGTGTACCCTAAGCCAAAATATGTGG  
 ACATGTTTATTTCCACTCTGCAGTGTGAGTATTTCTACTCCCATGATTCCTTGACATAATTTTTACAGCTGATTAGCA  
 GTGAGGCTGTGGGAAGAGTCAAGTTGGGAGGGTACTGAGGGAGAGGACAGCTGGAGTCAAGACGAGTCCACTTAGAATT  
 GAAGTACTTCATAGTGGGGTGGTTAGGATAGGAATAATGCAATTTAGGTTTGTCTTCGCCACAGTTCCTCTGCT  
 GCAGAGGGAAGCCAGATCTAGGATCAGGTTCTCCCTTATTCAATGTATTCAATGTTATTCATTGATCTAAGAGGCAGCATT  
 GGCAAAAATCAGCAATCCTACTCTGAAACACTTCCCTGAATATGGCCACAGATGTTTAGTCACTATGTCTAAGTTCTATTA  
 CATTATACAGGCAACATTTTGACCCATAACTAAGTCTTCATCAGGACCAAAATTTACAACATGAAGTGTCTTCTGGGAT  
 AGCTCAATTAGCAGATAAAGGATGTGTGCATACAGTGGGCATACGGGTAGTCCATCCCAAGGAGCACACGAATCCCCC  
 CCCCCAACAAATGGAGGCAGTGGCGTAATCTCTGAGTGTACAAAACATTAGGAGCACATTAATAATTTAGATTACACCC  
 CTTTTGCCCTCAGAACAGGCTCAATTCGCCAGGGCTGGACTCACAAAGGTGTCAAGCGTCCACAGAGATGCTGGCCCCA  
 TGTGACTCCAATGCTCCCACAGTTGTGTCAAGTGGAGTGGATGTTCCATTGTTGATACACACAGGAACTTTTGAGTG  
 AAAAACCAGCAGTGTGCTCCTGGCAATTACTACCGTACCCTCTGAATGGCAGCAGCACACAATCCATGTCTCAATTGT  
 CTTAAGGCTTAAAAATCCTCCTTTAACCCGCTCCGCCCTTCATCTACACTGATTGAAGTGGATTTACAAGTGACGTC  
 AATAAGGGATCATAGCCTTACCTGGATTACCTAGTCAAGTTTATGTGATGGAACGAGCAGGTGTTCTAATGTTTTGTGTA  
 CACAGTGTATATCATATCAATATGTGCAACCACACTATCGAAGCTTATTTGTGAAATAGACACTATTTACTTGTATTGCAAC  
 GTCATACGATTTCAATATAATATAAATTCAAATGGAGGACAGTAATTTGGTAGCACGCTAGACTTTGAAGTGACTGTGAG  
 TGAATCTGTGAGGAAGTGTGATGTGTCAGTGTGACAAATATAATTTTTGAAACACTTTTCTACTGACTCGA  
 GAGATGTGTTTCTAATGTTTTGTGCACTCAGTGTACGTTTTAAATGAAGACTTTGCTTATTGAAATCAGCGGCAGCCTTT  
 GCAAACCACACACTGTATCGCACAGCCTTGTATTTACCAGCCTTTTATTTATCCAAATCATTGGCACCTCGACATCACC  
 CCTCTTCATTGATAGGAGTCTCATGCATGCAAAATGATTCACCTTCTGTCTCAGCCCTGAACCCAGTGACCCCACTAGC  
 ATGTTTCAATGTGACACACAAGCTATGTCTTGTCTTTTTCGCTCTCTTTCTGTGTGTGTGTGTGCACATTTCCATGAAT  
 AAGAACTTCCAGTTCAGCATGTGTGTGATTTGAGCAGAATTGCTACTCATTTTCATAGAGCCCAGGCCAGTGTGTAACAG  
 TCGGCCCTTGGCCCTGTCTCTCCAGACAGGGCCTCAGTCACAAGCACGCATTTGCCAGTAAATGTGATAAGGCTTGC  
 AGCTGGGCCACCATGCAGTGTGCTTCCCTCTCTGTCTGTCTCCCTCACACACTGTACATCAGACAGGCTTGGTGTAG  
 GTATGCACCATACTGACAGGGCAACCTCCAGGTATTTTACCCAGCCAACACTGAGATAAGTGCCTGACTCTGACAA  
 ATCATCAGACCAAAAGCAACTTCCATTCTGAGCCTTAGCATAGGGCTTATATGAGTCTGTTGTTGCAACTGTACTCTCACA  
 AAGGAAGCCGTATGGATGGTGTATCACAGTTGTTTTCTGGCACTTTAATTTGGGGAGGACGGGCTCGTGAAAATGGCTGGAG  
 CGGAATTTAGCTTGGTGGTGTCTTTAAACATACACTCTTAGAGGAAAAGCTGTATCAAGAGCCTAAAAGGGTTCTTCGG  
 CTGTCCCCATAGGAGAACCCTTTTGAACCCTTTTTCTGAGTGTACTTAAGTCAATTTCTACAGTGAAGTGCCATAAAC  
 AGAAAAGAAGCTGTGCAAACTCAGTTGATTTGTATCATCATGTATATTATGCATACAATCCATCTGTTTGTCTTGTTCAGCA  
 CACATGTTCTGCTGTTTTGTGTGTGCTCAGTGGCTATCACTCAATATTTTCTGTAGTGTGGAATTTTCGACGCTT  
 TTTACTGACTCGGATCGTTTCGACTCGTTCAAGTAAAGTATGAATCTTTTCGACTCATTTCTGTTGTTTTTATTAGTAAT  
 GCCCAGAGCGCGCAGGGCCCCCTACCAGCAACGATTAACATAAACTTGAACGGCTTATGATTTCTACAAGCTCTCGTT  
 CACCATAAAGGGCTTATTGGAGCTGCATTTGTGACTGAGACTTACTAAAGTGTGCTTCAAACAATGTACATTTGTGATA  
 GCTAGGCATACAACCAGACTAGATTGTGAACGACTCTTTGCGGAATGACCTGCCTGCCTGCCGAGAGAGAAGCAGGGCCCC  
 CAACGATTTCTCCCGATTTTTGTGTAGTAGAGCAGGCGCTGTGCTCTACAAAGCTGTGTAGCTTTTCAATAATCA  
 ATTAATGACATTTCAATATTACACCGTGAATTCAAATACCAGTTTCAAACTGTATTTCTCTCTGCTGTCAGCATGA  
 TCTGTTTGCCTGCGCACACATATGATAGACAGTTGTTGGTGGTAGCAGGCTCTGGAACCGCTGAGCCGGAGAAAAGTGGT  
 ATTAATCCTGCTGTAGGATTCATCGTGGCCAGCAGAGCAGATCAAACGAACCACTAAAAAGGAACGAGTCACTCTGAAAA  
 ATGTATCATGACTCTCGAGTCAAGAAAAGGTTGTTAAAATAATAATCAATTTGTGACCTTGCCCATTCAGAGGGTGAAT  
 GGGCAAGACAAAAGATTTAAGTGTCTTTGAACAGGGTGTGGTAGTAGTACAGTACACCCGGTTTGGAGTGTGTCAA  
 GAACTGCAACGCTGTGGGTTTTTCAGCTCAACAGTTTCCATGTGTATGAACAATGGTCCACGACCCAAAGGACACCC  
 AGCCAACCTTGACACAACCTGTGGGAAGCGTTGGAGTCAACATGAGCCAGGAAAGCTTTCAACACTTGTAGAGTCCATGCC  
 CTGACAAAATAGCAGTGTCTGAGGGCAACAGGGGTTGTAATATATTCTTAATATTTTTGTTCACTCAGTGTATTTCCATT  
 TAGCGTATCTGAAATACCGTTGAGTTAGAAAAGAGACAGGGAGATATGAGAAAATTTAAATATCAGTAAGTAGGGCAAAATG  
 AAATCTCCTCAACAGAACTCTCAATAGATGAAGACAGATTTGCATCAAACTAGATTTTTTTTTTTTTTTTTTTTGGCAGC  
 TGAAAATGGCAAGCAAAGCATGCTGCAACATTTGAACATGGTGTGAGTTGCTGGGTCCACAAAATAGGGCTCCTATTG  
 ACAATCTCCCTTGTATCTGAACAGAAGGAGCCCTCTGTTCAATACTACATGGCAGGAACATGTTATTTGCATGCTAGTT  
 TTGTTAGCTAACAGCCACCATAAGACACCATCTCAGTGCAGAGGCGTCAATGCAGTACCTGGTTCGAATCCAGGCTGC  
 ATCACATCTGGCCGTGATTTGGGAGTCCCATAGGGCCTCGTCTGGGTTTGGCCGGGGTAGACCGCTCATTGTAATAATAAT  
 TTGTTCTTAACTGACTTGCCTAGTTAAATAAAGGTTTTAATCAAAAATAAATAATGTGACAATGCTAACCTGTCTAAATC  
 TGAGTCCATGCTCTGGGAGCTCTAGAGAAGGTTGACACAATGGAAGAGTCCAGTCAACAAGGACTTTATGACAAAAGAAG  
 AAATACTCATTTTTGATGGAACCAATGAAAATTCATTTGAATAGTTTTGTATTGGTTTTGTAACCTGAAATCAAGTGGAAA  
 CAGAGTGGACTATTTCCCAACCGATTCACATACAGTGGATGTGTGATATGTAATGGTTATATAGCAGTCCCTC  
 ACACAATATATCTGAGTGTATGTGAGTGAATTTCTAGAGAATTATATCTAACAGACATTTTCTTCCCTTTCTGTCTCTG  
 CAGTGTTCCTTTGTGGTGGGGGGTGGGGTGGCCAACGGTGGTGGGGGCTGGGCCAGGGCTGGGGCTGGGACCGCTGT

ATGCAATGGGAACCAGGGCTTGGAGAGGTGGCCAGGCCAGCGTTGACTGCCCGGTCTGGTGTGTCTCTGCCAGGG  
 ATGCAGGGCTAGGCTCAGGGAGGCCGTCAGAGAGGGGAGGGGGGCCATCAGACTGCCACAGACATGCTTAGCATCAAAC  
 TCCCCAGCTCTTCGACATCCACCAAGTCCCCAAGTAAAGATGGCCAGACTGAAAGAGAAAACCTTTCAACACCAATTTCA  
 CAAACCTTCTGAGGTTTTCATGACTAAATGTTTCATGTTTTCTAAATATAGGATATGGTGTGTCGAGATCAGGATTTGTGCA  
 TATAGTTTCCAGAGGGCTGTTTTGCGCTTATGTTCAACCCAGTCCCTTGTCCATCTTCAACCCGGGTCCGTATTACAAAAGT  
 GTCTCAGAGTTGCAGTGTGATATAGGATCAGTTTAGCTATTAATATGAAGTGACGCCGACAACCTGCCCGCTCGA  
 CCCATCCCCCTCCCTCCCTCCCCAGACCATCTCTGGAGACCTTCTCCATTCCTCACTTCCCTCATCAACTCATCCCTGA  
 CCACTGGCCACGTCCCTCCCTCCCCAGACCATCTCTGGAGACCTCCCATTCCTCACTTCCCTCATCAACTCATCC  
 CTGACCACTGCATCCCTCCCTCCCCAGACCATCTCTGGAGACCTCCCATTCCTCACTTCCCTCATCAACTCATCC  
 CTGACCACTGGCCGTGTCCCCTTCTCCCCTCCCCAGACCATCTCTGGAGACCTTCTCCCCTTCTCACTTCCCTCATCAA  
 CTCATCCCTGACCACTGGCTGTGTCCCCTCTGACTTCAAAATGGCCCTGAGTCGCTCCCTTCCCTCAAGAAACCAACACTCG  
 ACCCTCTGATGTCAAGAAGTGCAGACCTGTTTCCCTTCTTTCTTTTCTTTCTAAAACACTTGAGCGTGTGTCTCTGAC  
 CAACTCTTTCACTATCTCTCTCAGAACCATCTTCTTTATCCTAACTAGTCAGGCTTCAAGACGGGTCACTCAACGGGTCA  
 CTCACCAAGACTGCTTTCGCACTGCCAAAGCTGACTTTCCTCCCTGTTCGCATCCTCCTAGATCTATCCACTGCCT  
 TTGACACCGTGAACCATCAGATCCTCCTCTCCACCTCTCAGGGCTGGGCGTCTCAGGCTCTGCACACTCTTGATTGCA  
 TCCTACCTGGCAGGCGGCTCCTACCAGGTGACTGTCTGCACCATGTACTCTCACTATTGGTGTGCGCCAGGGCTCGGT  
 TCTAGTCCCTCTTGTCTCTCTATACACCAAACTACTAGCAGATATCTCAGCTTGGATGTGCGCCCACTCAAGC  
 TCACTCTCGACAAGACAGACTCCTCTTCCCTCCAGGGGAAGGCCCTGCCCGCTCCAAGACCAATCTATCACGGTTGACA  
 ACTCCATGGTGTCCCCCTCTAGAGTGCAAAGAACCCTGGCAGAGACCTGTTGTTCTCTGCAAACATCAAAGCAGTGACT  
 TGCTCCTGCAGGTTATGCTCTACAGGTTAGTAGAGTATGACCCATCTCACAAAGAAAAGCGGTGCAGGTCCTAATCAG  
 TCTCCCGTCTGGACTACTGCAAATCGCTGTGGTTCGACTCCCCGCTGTGCCATAAAAAACCTGCAATTTATCCAGAAT  
 TCCGCAGCCACACATTTTTTGTAAATAAAAAATTAAGAAAGATTGCCCTACTAGCACTGACTTTGCTGATAGTACT  
 AAAAAAGTACTTACTATGACTGAGATATGTGGTTCTCCCACTAGCTATCTTACAATGAATGCTATCTTAAGATCAAC  
 CAACTGTAAAGTACACTGGATAAAGAGTGTCTGCTAAATTAATAAAATGCAATGTAAGTGTGATCAGATTTGCTGTCT  
 AAGACACTTTTTGAAATACAGGCCAGATGTACCAGACTAGGAGGACAGGTCTTGATGTCTCCAGTTGTTTGTAGATG  
 ATCTCTATAGTAGCTATGTACTGTGTATCACAGTGTTCCTTCCAGGTGTTCCGGGAGGATGGCATCATCTCGGGATA  
 CCGTACCCCCAAAGTCCGCCCTGGACTGCATCCTTAGCAGCTTCCAGATGACCAATGAGACAGTCAACATCTGGACCC  
 ACTTCTGCCACATGGTATGTACACCAATGCAAACACTCTGAATGAAGACAAGGAGATCAGATCAATAGATAGCGGGAG  
 GTATTCTGTAAACAATTAGGGCTGTTTACTGGAAGAACATCGTATCAGATTTGATGTCTTCCAGTCTTCGTATCAAATC  
 TCCGATCACTCCCCATTTCAATTTCAAATGGAACGCGGTGTTGCGACGCGTCTCAATTTCCAGTCTTCTGTTGCG  
 GCTTCCAGCGTCTGTCTCCACACTGAACTTCTGTGCGAGAGACTACACCTGGCCGCTGCTGGTGTACATGCTGCTAATC  
 TGCGTGTACCCCTTCACTCCAGCTGTGCCACACCTTCAACCATGTGCGCCGAGGCACGCCACATCTGCTACTTCTT  
 CGACTACGGCGCACTAGCCTCTACAGCCTGGGTAAGGCCGCTGCATGAAGTCTGACTGTCTGCACCTCACAGTTAGAC  
 TATTAGTGCTTCCCTTCCCTTATGTTATTTCTTTTTGGTTACATTTCTCCAGTACCAGACTGCCAATCTCACAGTAG  
 GCTACTGCTTCCCGTAATCCAAACTGGTGAATCGCACAGGGTACAGGCCACATGCAATCTTTCAAGTTCCAAAAAGTAT  
 CGGTGAACCTGGGCAATCAGTTGCATGATTAGAATTTATATACTACTTCCACATTTGTAACGACTGTTTGTGTGGTTA  
 CTTCAATTTGCTGTATGTTGATTTGGCGCTGTGTGCTGATGTTGCTGTGCTGTCTGGGCTTGTGATTCACATTA  
 TTAAGTTTTTGGCCACAAAACCTCATAATAATACATGTCTTGTTCAGTATCAAATCAAATCAAATGTTATTGGTCA  
 ATATAATATTTAGCAGATGTTATTGCGGGTGTAGGAAATGCTTGTTCCTTAGCGTCAACAGTGGGTGGTATCTAACA  
 ATTACAATAATACACAAAATCTAAAAGTAAAAGAAATGTAATTAAGAAATGTTAAAAATTTGGACGAGCAATGTGGGA  
 ATGGCATTGACTATAATACAGTAGAATAGAATACAGTATATACAGTTGAAGTCGGAAGTTTACATACACCTTAGCCAAAT  
 ACATTTAAACTCAGTTTTTCACAATTCCTGACATTTAATCCTAGTAAAAATCCCTGTCTTAGGTGAGTTAGGATCACCC  
 TTTATTTAAGAATGTAATTTTCAAGATAATGTAGAGAGAATGATTTATTTTCACTTTTATTTCTTTCATCACATCC  
 CAGTGGGTGAGAGTTTACATAACTCAATTAGTATTTGGTGCATTTGCTTATATTTGTTTAACTGAGTCAAACGTTT  
 GGGTAGCCTTCCACAAGCTTCCACAATACGTTGGGTGAATTTTTTGGCCATTCCTCCTGACAGAGCTGGTGTAACTGAG  
 TCAGGCTTGTAGGCTCCTTGTCTCACACACACTTTTTCAGTCTGCCACAAAATGTTCTATAGGATTGAGGTGAGGGCTT  
 TCTGATGGCCACTCAATACCTTGACTTTGTTGTCTTAAGCCATTTGCCATAACTTGGAGGTATGCTTGGGGTCATT  
 GTCATTTTGAAGACCCATTGGTGACCAAGCTTTAACTTCTGACTGATGTAATGAGATGTTGCCTCAATTTATCCACAG  
 AATTTTCCCCCTCATGATGCCATCTATTTATGAAGTGCACCGACTCCCTCCTGCAGCAAAGCAGCCCAACATGATG  
 CTGCCACCCCTGTGCTTACAGGTTGGATGGTGTCTTGGCTTGCAGCCCTCCCCCTTTTCTTCCAAACATACAGATG  
 GTCATTTATGGCCAAACAGTTCATTTTTTGTTCATCAGACCAGAGAAGCTTCTCCAAAAAGTACGATCTTTGTCCCCAT  
 GTGCAGTTGTAAAACCGTAGTCTGGCTTTTTTAATGGCGGTTTTGGAGCAGTGGCTTCTTCTTGTGAGCAGCCTTTCA  
 GGTATGTGATATAGGACTCGTTTTACTGTGGATATAGATACTTGTGTACCTGTTTCTCCAGCATCTTCAAGGTCC  
 TTTGCTGATGTTTGGGATTGATTTGCACTTTTCGACCAAAGTACGTTTCAAGGAGACAGAACGCTCTCCTTCCCT  
 GAGTGGTATGACGGCTGCGTGGTCCATGATGTTTATACTTGCCTATTAATGTTTGTACAGATGAACGAGGTGCCTTCAG  
 TCATTTGGAGGCTTGGCTGATTTCTTTGATTTTCCATGTCAAGCAAAGAGGCACTGAGTTTGAAGGTAGGCCTCGAA  
 ATACATCCACAGGTACACTCCAATTGACTCAAATGATGCAATTAGCCTATCAGAAGCTTCAAGGCCAAGACATAAAT  
 TTCTGGAATTTTCCAAGCTGTTTAAAGGCACAGTCAACTTAGTGTATGTAACCTCTGACGCACTGGAATTTGTGATAGAG  
 TGAATATAAGTGAATAATCTGTCTTTAAACAATTTGTGGAAAAATTACTTGTGTCTATGCACAAAGTAGTTGTCTTAC  
 CGACTTGCAAAAATTTTTTGTGTTGTTAAACAAGAAATTTGTGGAGTGGATGAAAAACGAGTTTTAATGGCTCCAAAAATAAG  
 TGTATGTAAACTTCCGACTTCAACTGTACATATAAGCTGAGTAAAGCACTATGCAAATAAGTTTCGACAGCTCAATACCA  
 CAGTGAATCAGAGTTTGTTCCTTTCACAATTTTCACTTGAATAATGTTTGTCTTTTGTTTTAGACATCCAGCCT  
 GAGGTTGCTCTTCCAACAGAGAAGCATAACAGGCTACTTACAACAGAAATCATGTGCAACAGTATGCACTGCACTGCA  
 TTTAGGTCAACAGACAGCATAGATTAATAATATCAGCCTATGTTTCTCTCGGATCCAGCATNNNNNNNNNNNNNNNNNN  
 NNNNNNNNNNNNNNNNNNNNNNNNNNNNNNNNNNNNNNNNNNNNNNNNNNNNNNNNNNNNNNNNNNNNNNNNNNN  
 NNNNNNNNNNNNNNNNNNNNNNNNNNNNNNNNNNNNNNNNNNNNNNNNNNNNNNNNNNNNNNNNNNNNNNNNNNN  
 NNNNNNNNNNNNNNNNNNNNNNNNNNNNNNNNNNNNNNNNNNNNNNNNNNNNNNNNNNNNNNNNNNNNNNNNNNN  
 NNNNNNNNNNNNNNNNNNNNNNNNNNNNNNNNNNNNNNNNNNNNNNNNNNNNNNNNNNNNNNNNNNNNNNNNNNN  
 NNNNNNNNNNNNNNNNNNNNNNNNNNNNNNNNNNNNNNNNNNNNNNNNNNNNNNNNNNNNNNNNNNNNNNNNNNN  
 NNNNNNNNNNNNNNNNNNNNNNNNNNNNNNNNNNNNNNNNNNNNNNNNNNNNNNNNNNNNNNNNNNNNNNNNNNN







TGAGGC AAAACAGGAAGCAGGTGAGGAAGGC GAAGAGGAGGTGGTAACTGACTGGACAGGGCCTCACTGTGACAGCAGC  
 TGCCCCGCAGCAGCAGCAGCTACACACACACACACACACACACACACACACACACACACACACACACACACACACACACACAC  
 ACACACACACACACACACACACACACACACACACACACACACACACACACACACACACACACACACACACACACACACACACAC  
 GGGATTTAAAGCTTTTAAAGCAGCATGTGGTCAAATCTTTATTTATTCTACACAAAATCAGTTTCTAAAGTTAATGAGCCAAA  
 GTCCTGGTCAATGTATTTAAAGAGAGGCATTAATCGGATCTAAACTGTGACATAAACAAGCAGGATACAACCAATGACTGT  
 ACAAGCAGACTTTCTGTGAACTCCGCTACACCTTTGAAATACACTCACTCTGTAAAAATAGAGGGATGTGTCAAAGA  
 TGAATGGAAGACAAATGCCCTGTCCGGAAGACTTTACTGCGGTGTGAAACTGCATCTCCAGGAATCTATAAAAAA  
 GGGAGGGAGAAAGTTACAATGGTTTCAACGACCAGGAGAGTGATGCATCATGGGTAGGATACCGTATTGGCTGCCTACC  
 TAGAATAGCAGGACAGGCTGGTGCAGAACTGTGTTGAGATGGCGATGGGCACAAAGTGTGGTGCAGCCAGCTGTTG  
 ACCGAGCAGTCAGGCATCACATATGACCCATAGTTTATGGCACAACTGAACACAAACACAAAAAACAATGAAAGGTTA  
 AAAAAAACATACGATATCTGAAACTAAATCTACCATGCATTTACCCACCATACTCAACCAAGCCTTAAAAATCATTAG  
 AAATGGCAACGCTCATAACATATCAATTAGGCTTTAATAAACCCTACTAATGAAACATTTGGCCTTGCACTTGTGTATACAT  
 GCTTCAACACCAGTTTAAATCCCAATGATGTACTTCCAATAAATCTAGAGGCTGTTTTAAATAAGCTTGCTGCAGAACA  
 CCATCTACAGTAAACATTTGCAATTCTTATCCCAGAAACGCTGTGGACATTTAGGCTGGGTATGTTTTGGCAGTAAGGAGA  
 ATTTGTGGTAGATTAAAGGATCAATTTACATTTACGTCTTTAGCAGAGCGCTCTTATCCAGAGCGACTTACAAAATGGTGCAT  
 TCACCTTATGATATCCAGTGAACAACCACTTTACAATAGTACATCTATCTTTTTTTTCTCTCTTTTTTTTTGTCAG  
 GGGCTCATATCCATAATATGGATTTGAAAAGGCACGTTTTTCAAAGTAAGAGACAAAGTTTATGTTTTGAAAGAGAGGGTA  
 CAGTCTATACACACACCATACACAAGCAAAACACACACCAAGAAAAGCAGTGTATTACAAGCAGAAATGCAAAATACCC  
 AAGTATGTTAATTAGCTGAGCAAGCAGTGGACACAGACATGAATCCATGGAAAATGTACATGTGAAGGTGATAGAATAGT  
 GGTATGCACACATCCATCAAACCTTTCCAGATGTGGATCCGAGAGGAAACATATGCTGATATTTAATCTATGCTGT  
 CTGTTGACCTAAATCTGACAGTGCAATCTGGTGCAGATGCTTTCTGTTGTAAAGTAGACTGTATGGCTTGATGAGCAA  
 CCCTCAGGCTGGATGTCTTAAATGAAAAGCAAACAATTTTCCAAGGTGAAAGAATTGTAAAAGAAAACAACCTCTGATTT  
 CACTGTTGATATGAGCTGTCGAACCTGTTTCACATATGCTTTACTCTGCTCATATGTATATACTGTATTCTATGCTACT  
 GTATTTTAGTCAATGCCCCCTCCGACATTTGCTCGTCTAATTTCTTAAATTTCTTAAATTTCCATTGACTTTTAGAGT  
 GTATTGTTGTAATTGTTAGATACTACCGCACTGTTGGAGCTAGGAACACAAGCATTTCCGCTACACCCGCAATAACATCT  
 GCTAAATACGTTGATGTGACCAATAACATTTGATTTGATTGATACTTGAACAGGACATGATATTATTAGAGGTTTTGTG  
 GGCAAAAAAACCTTAAATTACAGTGAATCTGACAAGCCAGACAGCACAGAAACACAACACACACAGCGCCAATCAAACA  
 TACACAAAACATGAAGTAACCACACAAAACATGAAGTAACCACACAAAACATGGTTACAAAATGTGGGAAGAAGTATATA  
 AGTTCTAATCGTGCAACTGATTGCCAAAGTTGACAGCACTTTTTGGAACTTGAAAGATTGCACGTGGCCTTAACCTGT  
 GGGATGACACAGTCCGATTTAGTGAAGCAGTACTGTGGAGTGGCAGACTTGGTACTGGGAAAGCAATTAAGCAAC  
 AGAAAAAATAACTAAAGGCAAAGGAAACACTAATAGTCTAACTGTGAAGTGCAGACAGTCAAGCTTCAAGCAGGCCC  
 TTACCCAGGCTGTAGAGGCTGAGTGC GCCGTAGTGCAGAAAGTAGCAGATGTGGCGTGCCCTCGGGGGACATGGTGCTGAA  
 GGTGTGGGCACAGCTGGAGGTGAAGGGGTACACGCAGATCAGCAGCATGTACACCAGCAGCGGCCAGGTGTAGCTCTCCG  
 ACAGGAAGTTCAAGTGTAGAGCACAGGACGCTGAAGCGCCACAGGAAGTACCTGGGAAATGAGATGCGTGCCAACACCCGTC  
 AGTTCCAATTCATATGAAATGGGGGAGTGATCGGAAGATTTGATACGAAAGACAGGAAGACACCAATCTGATGCGTATGCT  
 TCCAGTCTAAACAGCCCTAATTTGTACAGAATACCTCCCGCTATCTATGGATCTGATCTCCTTGCTACATCTCAGAGT  
 GTTTGCATTTGGTGTACATACCATGTGGGCAGGAAGTGGTCCAGATGTTGACTGTCTCATTGGTCTGCAGAAAGTCTGTA  
 AGGATGCAGTCCAGGGCGGAGCTTTGGGGGTGACCGTATCCCAGATGATGCCATCCTCCCGGAACACCTGAAGGCAAAA  
 CACTGTGATACACAGTACATAGGCTACTATAGAGATCATCTAACAACAACCTGGAGAACAACCAAGACCTGTCTCCTAGT  
 CTGGTACATCTGGGCTGTATTTCAAAGGTGTATTTGAGCAGGAGTGCTGATCAACACTTGTATTGGCAATTTTAGTAAT  
 TTAGCAGACTCTTATCCAGTGTGACTTACAGGTGCAATTCATCTTAAAGATAGCTAGGTGGGACAACCCATATCTCAGT  
 CATAGTAGGTACCTTTTTTTAGTAGCTAACAGCAAAGTCAAGTCAAGTAGGGGGAAAAAGTCAAGTGCAGGTTTTAGTTC  
 CGAAAGGCAATCTTTATTTTATTTTATTTTACAAAAATGGGTAAAGATTCAAGTGTGAACAGTCAAGGTGTTGTGA  
 AATGTTTGGAAAGTATTTCTCTTTTCCAGTATGGTCACTGTTACCTTGGGACTTGGTGGATGTGCAAGAGCTGGGGAGT  
 TGATGCTAAGCATGTCTGTGGGCAGTCTGATGGCTCCCCTCCCTCTTTGGCAGGCCTCCCTGAGCCTGGCCCTGCATCCC  
 CGGCAGAGGACACACCAGACTGGGCAGTCAAACGCTGGGCGCTGGGCCCTCTCCAGGCCTGGTCCCATTGCATACA  
 GCGGTCCCAACCCGACCTTGCCCCAGCCCTGGGCCCAGCCCCACCACCGCTGGCTACCCACCCCCACCACAAAAG  
 GAAACACTGCAGAGAGAAAAGGGAAGAAAATGGCTGTAGATAAATGCTCTAGAAAATTACACTGACATACACTCAGAT  
 ATATTGTGTGAGGACTGTTACATACCCTCAGAACATAGAAATGTTTACATATCACAATGACACATGACCATCCACTGTATGTT  
 AATTTGTGGGAAATAGTCCACTCTGTTTCCACTTGATTTCAAATTAACAACCAATACAAAACATTTCCATAGAATTTT  
 TCATGGTTCCATCAAATGAGTATTCTCTTTTTGTCATAATGTCCTTTTTGACTGGACTCAACACAGTCTTCCATTGTG  
 TCAACATTCTTAGACGTCCCGACATGGACTCAGATTTAGACAGTGGTAGCATTTGCACAATATGGTGGGTTGTTAG  
 CTAACAAGCTAGCATGACAATAACATGTTCTCTGTATGTAGTATTTGAACAGAGGACTCCTTCTGTTTCCAGATGCAAGGC  
 AGATTGTCAATAAGAGCCCTTTTGTATTGAAGCCAGCAACCCACACCATGTTCAATATGAGGGATGCTTTGCTTGCCA  
 TTTATCAGCTGGCAAAAACAACAAAACCGCGTGTGGTGTGATGCAAAATCTGTCATCATCTATTGAGAGTTTCTGTTGAG  
 GAAGTTTCATTTTGGCCTACTTACTGATATTTAAATCACTCATCTCTCACTGCTCTTTATAACTGAAAGGTTTTT  
 AGATACCCCTTATGGAATAACACTGAGAGTACAAAATATTTGGAACACCTTCTTAAAAATGAGTTGCACCCGCTTTTGGC  
 CTCAGAACAGCCTCAATTGTCGGGCATGGACTCTACAAGGTGTCGAAAGCATTCCACAGGGATGCTGGCCCATGTTGA  
 CTACAATGCTTCCACAGTGTGTGTCAGGTGGGCTGGATGTCTTTGGGTCGTAGACCAATCTTGATACACAGGGAAACT  
 GTTGGAGCTGAAAAACCCAGCAGCAATCGGTGCGCCTGGTACCTACACCACCCCTGCTCAAAGCCTTAAATATTT  
 TGTCTTGGCCATTCAACCTCTGAATGGCACACATACACAATCCATGTCCTCAATTGTCTCGAGGCTTAAAAATCCTTCTTT  
 AACCCGCTCTCTCTCCTTCTATCTACACTGACATCAAGTGACATCAATAAGGGATCACAGCTTTCACCTGGATTACCTGG  
 TCACTGTATGCTATGGAAGAGCAGGTGTTTCCAAATTTTGTAAACAGTGATATCATATCAATGTGCAATGTGCAATCACTA  
 TCAAAGCTTACTGTGAATAGACACAAAATGACTTGGGTTGCAAAGTCATACCGAATTCAAATAAATAAATAAATAAATCAA  
 AGAGGCAGTAATTGGGAGCAGCTAGACTTTGAAGTGACTGATGTGAATCTGTGAGGAACAGGAAATTCGTGATGTGCAG  
 TTCACAATTTTTTAAACAACCTTTCCAAGTACTGAGAGTCAATGATCATTTTTTCAGAGTACTGCTTCCTTTTAG  
 TCGTTCGTTTTGACCTGCTGCTGGCCAGCATGAATCCTACAGCAGGATTCATACGCATTTCTCCGGCTCAGCGGTTCCA  
 GAGGCGTGTCCGACCACCAGCTGTCTGTATATGTGCGTGCGGGAAAAATAGATCATGCTGCATGTGCAGCATAGAGAAG  
 AATAATCCATGTTTGAAGCTGGTATTTGATCTCATGGTGAAGAATGAATGTAATTTAGTTGATTTTTGAAAACCTACACAT





TCTGGATGTCCTTTGGGTGGTGGTCCATTGTTGATACACAGAGTAACTGTTGAGCGTGAAAAACCCAGCAGAGTTGCAG
TTCTTGACACAACTGGTGCCCCGCCATCTACCATATCCCGTTCAAAGGCACTTAAATCTTTTGTCTTGCCCATTAC
CTCTGAAATGGCACACAGACAATCCATGGCTCAATTGTCATGAGACTTAATCTTTCTTAACTGTCTCTCCCCTCA
TCTACTGATTGAAGTGGATTTAAACAAGTACATCAATAAGGGATCATAGCTTTACCTGGATTACCTGGTTAGTCTA
CAGTACGTACATGGAATGGAATGTTCCAAATGTGTTGTACTCAGTATAGTGTGATAGCTAGATTGATAGTGTGG
TTTATGATAGAATGGAATGTTCCAGAAGAAAGACCTGTAGTCGGAGCTGAGCCATGTCTCTCATCAAGCGGTTTCGTCGA
GCCTCCTCTGCTAGACACACAAAACGCACAAACAGTGTGAAATAGATAAGTTTGCAGTCATTTGAGCTTCACAAGT
GAAACAAATACTGAACTAGAGCGACTGCTGCTGCTTGTCTCATTGGTTCATTCAACTGCCGCTCACCATGCGGATCT
GGGCCTTGGCCTGCTGCACCAGGTTGCTGCTCCGATTGGCTGATGCTGGTGAAGATGCCCGCCTCCGGGTTGAAGTGC
AGCACATTGCATTGGAGATTAGTAGGAAAGTGGCCAAAGCTACGGATGCAGCACACGCGCACCACACACTGAGATGGGA
GAGCAGAGAGAGATCAAGTGAGATAGTAAAGTAGAGAGGGGGCAGCAAAAACAATGAGGGTGTCAAAGGAAAGCTAGGTG
TGTGTACCTCCTGTACGGGCTGAGAGAAGGCTGGGGCGGTTGTAGTCGAGGCGCGGTTGGCCAGGTTGAGGGCAGGT
AGGTGTCGAGGGCCAGGTCTCAGGCAGCAGCAGGACTGGACCAGGCCAGGCTGCTCACACTCACTCAGCAGCTCCAT
CACCTCAGTGTTCAGACCAGCTCTAAAATACACACACAGAGAGAGAGATTAAAGAAGTGACTTCTTGTACATGTGCT
CCACAGAGACACATTTGGAATTTCAATCCCTGAAAAGATGGGTTAAAATAACCAAAGGAGAGGAAAAGAGAACAGATGGAA
TGAGAAAATAATGTGAGAGGGGGGAGAGAAGAAATTTGGCCAATCAAGCTCCATATCGGGCTCCCGAGTGGCACAGCGGT
CTAAAGTACTGCATCTCAGTTCTAGAGGCATCACTACAGACCATGGTTGACTCCTGGTGTATCACACACAGCCATGAT
TGGGAGTCCCATAGGCGCTGCACAAATTTGGCCAGGCTCATCCGGTTAGGCAGTCATTGTAAATAAGAAATTTGTCTTA
ACTAACTTGCTAGTTAAATAAAGTTAAATAAAAAAATAAAAAAACGCAGATTAACAACCCATAAAAAAGGACAGGTGCA
TTTAGTAACCTGCCTGCTTCCAGCATCTTGTCTCCATCAGGCAGCAGGTTGAGTAGCACAGACAGTCTGTCCATAGGCT
CTGAGAATCTACAGACAGAGTAACCGAATTACATTGAGCGGAGGACGGACAGTGAAAAACACCAACAATAATGAAGACT
ATAAACCCCTTGCCCCGAGTCAGCTGATACAAAGATTAACTTGATTTTACCAATTTAATGCAAATTTGGATTTTCAATGC
ATACTGTTTGTAAAGTGTCTTTAGGTTACTGAAAATCCAGCCCTTACCTGTGCACACATGACGATAATGTCAGTGTG
TTCTCAGCCAATCCACAAACACCTTGACCACCTGGATGAGCCCTGATTGGTCAGAAATCTCCAGTCTCTGACAGGGT
CTTCTCGCTGTGTACCGATTGGTTGCTGTGCACGCTACTCTGAATCGGAATCCACCTCTACAGGGAATGGACAAATAA
ATAAATAACATGTGTTAATCTACACCCTAGTTTTCTTAGGGGAACTCAGATGTACTGTTATAAAATAGTATATTTT
AGCGATGTGCTGTTACTCAATGTAATCTTTGGGAAAGACTAAAAACAGATTAGAAGTACATCTTTATATTGAAGTTAATC
TTTTAAAAAACAATAATAATCATATCCTGCACATACAAAATACATAGTATTCAACTAGAGGTCGACCGATTAAATCG
GAATGGCCGATTAATTAGGCGGATTTCAAGTTTCTTAAACATCGGCAATGCTCTGTAAGGTCGACAGTCTTTGTGGAA
CGATGGGTAATGATGCTTCGAGGTTGGCTGTTGTGATGTGTTCTGGTTGCGAGCCAGGTAGGGGGCAGGAGAGGGGACG
GAAGCTATACTGTTACTGGAATACTAAAGTGCCTATAAGAACATCCAATAGTCAAAGGTACATGAAATAACAATGG
TAGAGAGAGAAATAGTCTAGAATTCCTATAATAACCTAAACTTCTTAACTGGGAATATGAAGACTCATGTTAAAAGG
AACCACCAGCTTTCATATGTTCTCATGTTCTGAGCAAGGAACCTAAACGTTAGCTTTTTTACATGGCACATATTGCACCTT
TTACTTTCTTCTCCACACTTTGTTTTTGCATTATTTAAACCAAAATGAAACATGTTTTATTATTTTGAAGCTAAATT
GATTTGATTGATGTATTTATATTAAGTTAAAAGAAAAGTGTTCATTCAAGTATTTGTTGTAATTTGTGATTATTTACAAAATAAT
AAATATATTTATTTATTTGTACTTTTTTTGGTAATATAAAAATGTCCGATTAATCGGTATCCGTTTTTTTTGGGTCCCTC
CAATTAATCGGTATCCGCGGCAGAAAATCATACTTGCTGCACCTTATAATCAACACAGCGTCAATGTGTGAGGCGGTT
ACTGACCATTGTGCTTGGTTCCGTTGGCAGTGCCCGGGGCGGTTGTCGAGGTTGAGTCCCCGGGGGAGGAGGGGTTCTCC
TGGGAGGGGTTGGTGGAGGGGGCTGTTGGTCCGTTGGGGTGGTGTGGTGGGCGGAGCTGTGGGGCCTCAGCAGCACGTT
GCTGAAGGTGGGGCCAGGCGGAAGCAGCGCTTGGCTGGAACAGCTGGGATGACAAGGCTGGAGGTTACTGCTGATAC
TGGGTCGCTGGGCAGGAGGGGGCCATTTGGTGGCCGGAGGGGTTGCTCCCGTCAACGCTCCCTGGGATTTGGCTTGCTCC
TCATCATCTCTCCGGGCTGCACCTCCCCCGAGGATGGGTGTCACAAAGTTCTCCGAGTTTCTGAGTCTCTATATCCTC
CAGTCCGAGCGGGACTCCTGGCTGTTATGTCGGAGTCACTCCACGTCGAAGGCCGTGCCACCCTCTCGTCTTCCCT
CCGACCCGCTCTCCAGGTCCTCTGTGCTGGTCCCTCCCTCTTTTGTCTCTCTCCACAGCTGGGGGGGGTGG
AGTGGGGGTTCCCGACGAAGCACCCCGGAGTTGGCGCAGCCCTCTGCTCTTTCTCTCTCTCTCATCACTCTCGAAGCC
CTCGCTCAGGTCTCTGCTCTTTTGCAGGTGGCGGGCGGGCGGCAACATGGAGAGGGGGGCTACTCTTTTGTCT
TCTGTTTCTCTCTCCGCTTCCGCTCACCGACGCTGCTTTCTGGGCCACAGTGTCCGGTGGCCCCCTCGTCTCTCC
TCATGGTCCAGGGAGCCGTTCTGCAGGGGCTCTCTCCGAGGTCAACGGGTGACAGGGGTTCTCACTCAGAGTCTGCT
TAGGAGCAAAACAATAATCATATCGTTCCATTTGTTTTTTCAGAGGATTAACAGAACATGAATAGTGTATGGCAGCATGA
GGTTAGTGGGAGTATGTTCTCCTGTGTTGCTGGGTCGAGCGGGGACCTGGCTCTCCCTCCAGCTCAGC
CTGCAGGCGGATGTTGACATGGTTACCAGGTGGGAGAAAGAGGGCCAGCGTGAAGGCTATTGACGCACTGTACTGCTTGG
ACCCTACACAAACAAGTCGACATATCAGCTTTGCAATAACAACGAATCAACATATCCCCCTATTTCTCCCTTGCAATATGT
CACTATCCTCGCATGCCTACCCACTCAGCTCTACTTACAACACCCCTATGCGCATAATGTTTGAAGGCGATTTGTAAAAA
AAGAGAAGAAAAAAGACATCTATATTTCTACTGACCTCCCGCTTCCAGGCTGTGCACCACCATGAGGCAGGTG
ACCACCATCTTGAAGATGAGGGCATCGGGGAGCAGGGCGCAGGGCGAGTCTGTCTCTCAAGCTCTCTCAGTGGGGGA
AGTGGCCTCGTGACATGTGGCGGGCAGGGCAGGTAGAAGCAGCAGGTTAAAATCTCCAGCACCCTGACACAGAG
AGGTCACTCTGTCTCCAGCAGACTACTCACAGGGGAGAGAAAATGTAAGACATTAACAACACGGTACCCAACAGACA
ATAGAAAAGCAGGTTGAGACTGACAAAACAGGGTTATAAAAAATCAATCAATTTGTTATTTATCATCAGATAGCTTTGTCATA
TATGGACAAAATATCAAGGTTCCATTAAGATAAATGACTAGGGCTAAGTGGTGAAGTGAAGTCTAACCTGTTCTTG
GGCTGCAGTAGACTCTGTAGGTACATGAAGCTCACCAGAAGTTGCTTGATGTCCTTGGACTGGAAAGAAAACAGTTGAA
GAAACAGTCTCTTTGGGATTGTTACTATCTCAATACCTGTTTCAATGCTGACCTAGTGATTTGTCAATTCAGGGCTGTG
GTGTGAGGAAACAGACTGACCTTTGCCGTGAGGGAGAGGCCCTTCATCTCTGTCTTCTCCTACCTGGTGGTACATCTT
AGCAGCTTTATCAAACAGACGCTTTAAATTTCCGTAGCCCTCGAAGGGAGTCTCCGACTGTATACTGTTCAAACACG
GGACCATAGAGGAGAAAAACATGATCAATACTTGGTGGTAGGGGTTGACGATAACCAGAATCGCAATTTTTTCCCATGG
CAATGAAAACACAAAGCAGACGCAACTCTTTGGTCTTTAAAACCTTCTGTATGTAAAAATAGTGTGTGCTATAGCTTAG
AAAACAAATAATTTGTACTGGATGACAACAATGTTTCTTTCCAAAATCAGGGCTGTTTTCTGAAAGTTCAATCCGCTTTG
TGTTTTGTAAACCCACACTACTAACGAGTATTGCAATACTGGTATCTCCGGTACCCTCGGTGGCAGTCTTTTTTTT
TAACGTGTTCTGGATCCGAAGTTGGGCTTCTTCTCTAACAGACTGATTTGAGAACCCTACCATTTCAAACATGCTATT
TAGAGCCTACTGATGTGATCCAAATATGAATTTGCTGCTATGAAGATATTTCTCCCCAGCAGTGTGACTACATTGCCCCAC

TGAGGTAGAGAACAATAGCACAGCATAGTCTACAGACCAGTCATAGATAGACTGTGGATGTGCTGCAGTAAATCTAGACG  
TGTTGAAGTCTCCTCTCACCAGCGTAGGTAGTAATAGTGGCCTCCACATTGTAGAATTTACTCCCCGCCAGTGTACCTA  
ACTGATTTAAAAGGCATTCCTGAAAACAAAACATCAACACATTTGTCAACATCATGGCACACTAAAAGACATTTGCTTTCTTT  
AGCAGCAGCCTTTAATATTGACTTTTCAGTTTCGACTGATGAAGCCCCTCGAAGACCCCTCGAAGACCCGCTTCAAAAAGACAGAACGTTTCAA  
ACGTGGATCAGTGAATTTCTTGAGACTGAATGCACCTCTCCTGGCCCGCTAACAGTTACTGAATTTCCCGTTCTGGCTCAA  
ATGGCCCGCTAACCATTCAGCTAGATCACTATGAGTTGCGTAAAGCTTTGACCAGTCATATAATAAAGCTCAATCAATAA  
GTGTTGTGTGAGTTCATCACCATGTGGCAATATAACAAGAGTGATTCAATTTGTAGATGGTGGTGTGGTGTGAGTAACT  
GGTTAGTGTAAAAACAGTGGTTAATGTGCTGTGAAAGGGAGGGCCGTAACACCTTGTGTCAACTCACCTACGTGCGGA  
GTGACAGACAGGGCCTGATGGTAGAACCGCTCTGACAGCTGCTCAGCCTCCACCCCAGCCAACCTCGTTCTGGTAACGGGC  
TGCGAAAACATTCAAAACAACCTCCCGTAAACCCCTCCTGTACATTCAAAATAAACCTGACCTTGGATTGGGGAATGATA  
TTCCATGGTCATACAAATAAGGTTGTCTCAAATCTTTGGTGGAGAAAGATTAAGTTTGTATTACCTAGATCTCCAGGT  
ACACCAGGCAGCGATGGCAGGCCATTTGGGCCAGTCCATCTCCTTAGGGTTCGCTGATACCGGCTTCTCCGACCTACA  
GAAACAAATACAATAATTTATACACTGTCAATCACAGATACCGCTGACCGGAGTGTGTGTGTCTCACCGATGAGGGGG  
TCGGTGACATGGGTCAGTCGATGCAGTCCTGCATTTCCAGCTGGTAGTGGGACTGGATGTAGAGCAGCAGGTGCTGGTA  
GAAGCCCACGCCGGCTATCAGGTGAGTCTGTAGGCACACTCCAGGGCACTGCGACTGTGGATGTGCTGCAAAAAGACAGA  
GAGATAAAAAGGGGCCAGGTAATAAGAAGAGATTAGAAAATAAAGTTACGGGTGTGTGTAGGCCATGAGGAAAAGATAA  
AGTGTGCATCTGAAAGCTGAGCAGTCACTGTACTGGCCACACAGTCAACATTTCCCAATAACTTAGGTTAGGTTTCC  
ACATAGTCCCTTTTAGACATTTTTGTGAACCTCAGTCTGGCTTGCCATTAATTTTTGTTCAGTGTAAACACTCCAAAAGGA  
ACTCAGACCCCTCAAAAAGAGCCCCGAAGCAACTGAGACCATCTCACTTGAATTTCTGGTCCGGTTCCATTATTTAGG  
GCAATGCGCCCCAGGTTCTGCTTGTGATTACACACACTACTGCAACACTGTTTTCCCTGCCATAACCCCTAACATTGGTG  
CCACAAGAGAGAAGATTATGTGCAGGTCGAGGGGAAAAAAATGTGTGCCATTTTGGATATTGATTAGCGATTGTCAA  
GGACACGCAGACATTCAAAATGTGTAGTATTTTAGTTTCCAGATTATTTGTGGTTCGCAATATGTGATCTATATGAGAGTTTC  
ATACACTGTTTATTGATTGTGGGTTTGAAGTGAAGAAAACATATTTGGTGGAGAACATAACATAACGTTCCAACTTATT  
CTAGCGCTTTAAGGGCCGCTCCTACATTTGGGTTCAATTTTCAATTCAGCATTATTTAATCTGCAAGTATTTCTTCTCC  
ACTATTTATTCTGTTACCAATAATAATTACATGTTAATAGTATCTTCTGATTACAATTTATATGTCTCATCTTTTAACTA  
AATGCAATATATTAGATTCTGCAATGTAAGTAGGTATATCTGTCCAATAACATATTTTATTAAATGTATTTTGTGAT  
GTGTGATGATAGATAGATAGATAGATAGATAGATATTTTTAAACAAGTCAAGTCAAGTCAAGTCAAGTCAAGTCAAGT  
TTACAATGACGGCTTACAAAAGGAAAAAGCCCTCCTGCGGTGACGGGGTGTGCATTAATAAATATAGGACAACACACAC  
ACCATGACAAGAGAGACACACAACACTACATGAAGAAAGACCTAAGACAACATAGCATGGCAGCACACATGACGAAAC  
AGTATGGTAGCAACATAACCTGACATGGTAGCAGCAAAAACATAGCACAAAGACAACAGCAGAGGAGCAAGAGGATAG  
ACAACGATACATACATGAAGCAGCCACAACCTGTCAGTAAAGTGTCCATGATGAGTCTTTGAATGAAGAGATGGAATAA  
AACTGTCCGTTTGTAGCGTTTATGCAGCTCGTTCAGTCTGTAACACTACAGCGAACTGAAAAGAGGAGCGACCCAGGGAT  
GTGTGCGCTTTGGGACCTTCAACAGAATGTGACTGGCAGAACGTGTGTGTATGTGGAGGATGAGGGCTGTAGTAGGCA  
TCTCAGATACAGGGAGTGTAGGGTTTTATAAATAAGCATCAACCAGCGGGTCTTGGCAGCGGTATACAGAGATGACCAGT  
TTACAGAGGAGTATAGAGTGCAGTGTGTCTTATAAGGAGCATTTGGTGGCAATCTGATGGCCGAATGGAAGTTCGCTT  
GTCCCAGAGCCGCTTGTAGGGAATGTGGAAAAGACTCTGGGTCATTTCTAAATATAGCAATGTGAATGAAAAGAGTAG  
AGTCTCATTCAAAAAGCAAGGAAGTGTGAATACAAAGAGAACAGAGTTTTTAGCTTTTAACTTCAAGGTTCACTT  
TAAAGAGGACGGAGATCGGTTATTTTAAAGAGGACTATATTGAAAACACCCTTAAATGCTGTACCTTCTTGTGGTCTT  
GACGACCTGGATGACCTCGTAGTAGACCTTCCCTCCAAAAAGCTCCTCAGCCTTGGCACCATAGTCCACAGGGTGGAGAA  
ACATCAGCTTACACACAGCTCCCTCAACTGGGCACAGAAGACAGATGAGGTTGGGGTTAGTGCTTTTGCCCTTTTGCCCT  
AGTGTTTAGGGCAAGGTTGGAGTAGAGTAAATGCTTACTTGTGGCAAGGCTGATGTTTTTAGGCTTGAAGACCTCCC  
TGATGATGACTTGCTGCCAATGATGACATCCAGCTTGTGCACCGACTCAACCCTGCCCCTGAGCAGCAAGAGACAGTT  
ATTATGGCAGGTGAATTTACTGTTAATGGTCAATGGAGGAATGAGGAACTCATTCTTATCAATGTAGGGAGCCAACATTA  
GCTACTAGCTATAACTAGAAATATAAACTGTAATACATGTTTCCACTGAGATAATGTTGATTAAGTCAACTTACTAA  
CTAGGTACAGTGAAGGAAAAAGTATTTGATCCCTGCTGATTTTGTACATTTGCCAGTGACAAAAGAAATGATCAGTC  
TATAATTTGAATGGTAGGTTTTATTGAAAGTGTGCTTCTAATCTCAGCTTGTACCTGTATAAAAAGACCTGTCCACA  
GAAGCAATCAATCAATCAGATTACAACACTCTCCACCATGGCCAAGACCAAAAGAGCTCTCCAAGGATGTAGGGACAAGAT  
TGTAGACCTACACAAGGCTGGAATGGGCTACAAGACCATCGCCAAACAGCTTGGTGGAGAAGGTGACAACAGTTGGTGGCA  
TTATTCGCAATGGAAGAAAACAAAAAGAACTGTCAATCTCCTCCGCTGGGGCTCCATGCAAGATCTCACCTCGTGGA  
GTTTGCATGATCATGAGAACGGTGGGAATCAGCCCAAGAACTACACAGAGGATCTTTGCAATGATCTCAAGCCAGTGG  
GATCATAGTCCCAAGAAAACAATTGGTAAACACACTAGCCATGAAGAATGAAATCCTGCAGCGCCCCGCAAGGTCCCCC  
TGCTCAAGAAAAGCACATATACATTTCCGCTGTAAGTTTGGCAATGAACATCTGAATGATTCAAAGGACAACCTGGGTGAAG  
GTGTTGTGGTTCAGAGGAGACCAAAATGGAGCTCTTTGGCATCAACTCAACTCGCCGTGTTTGGAGGAGGAGGAATGCTTC  
CTATGACCCCAAGAACACCATCCCCACCGTCAACATGGAGGTGAAACATTTATGCTTTGGGGGTGTTTTCTGTCTAAGG  
GGACAGGACAACCTCACCGCATCAAAGGGACAATGGACGGGGTCAATGTACCATCAAATCTTGGGTGAGAACCTCCTTCCC  
TCAGCCAGGGCATTGAAAATGGGTCGTTGGATGGGTATTCAGCAGTACAATGACCCAAAACACATGGGCAAGGCAACAAA  
GGATGGCTCAAGAAGAAGACATTAATGTCTGGAGTGGCCTAGCCAGTCTCCAGACCTTAATCCCATGAAAATAATGT  
GGAGGAGCTGAAGGTTTCGAGTTGCCAAAACGTTAGCATCAACCTTAATGACTTGGAGAAGATCTGCAAAGAGGAGTGGGA  
CAAAAATCCTCCTGAGATGTGTGCAAACTGGTGGCAACTACAAGAAACGCTGTGCCCTGTGATTGCCAACAAAGGTT  
TTGCCACCAAGTACTAAGTCAATGTTTTGCAGAGGGTCAAATACTTATTTCCCTCATTAATAAGTCAAAATCAATTTATAAC  
ATTTTTGACATGCGTTTTTCTGGATTTTGTGTTGTTATTTCTTCTCACTGTTCAAAATAAACCTACCATTAATAATAT  
AGACTGATCATTCTTGTGTCAGTGGGCTAACGTCAAAAATCAGCAGGGGATCAAATACTTTTTCCCCTCACTGTAGGTAA  
AGCTAAAAGAGGCTTTGAAATATGGTGTTCGCCCTAAGTTCAGTTCAGTTCAGTTCAGTTCAGTTCAGTTCAGTTCAGTTC  
TTCCATGTGGTGTGTTCTGCTAGACGCTTCTAGTCACTGCTACATAACTAAGTTCAGTTCAGTTCAGTTCAGTTCAGTTCAGT  
GCCTATTAGCTAACTAGTACTGTGACAATACTGACAGCTGAAGCTATCACAACCTAGTTAAACAACCTAACGTCATTTAGA  
AAGCAAGTTGACACAGGAATAAGTTATCTAGTTAATAGCACAGTAACTAGCACAGTAACTTGTCACTGCTCAGTTGTCTA  
GAAGCTAACGTTAGTTAGCTAATTTCTATCCGCTTCACAAGTCCCACTGTGCTACATCTGGTTATTTTAAACCCATAC  
TATCGAAAATGTCCGACTACTTCGTAATAATGTCAATTCGCCCTTCGACGAAGGCTTCGTTGACAAGTACAGTTAACTAGTTA  
ACGTTAGCTGATGCAAGTCACAGACAGACAGGTGACTGGGTAGTTAGCTAACTAGTTAGTTGAATAGATGGCTAGCTAGT

TAGCAAAC TAACGTTAGCTAAGGTTAGCTATCCATTTATTTTACTACTGTTAGCTAGCTAACGTAATGTTTCCAGCAA  
AGGCCTTTAACTCACCTGTATAGCCGTTTGATGAGGAGGACTTTTGCCTCCGGCTCGCTATCCTGTCCAGGTCCACTCAT  
GTTAGCATCTGGTGCCAAGAGTACACAGCTCCAGTCCAACAGAGTCTGCGTTCCCACCTCTTCAACCCACTTGTCTCA  
GGTTCCTCCCGGTTCCTCACC GGCACTGACAACTGTGTTGACTAGCTAACGTTAGATAGCAGCTCATCTCTCCCG  
TAGCCACTATGTCGCTTTTCGTATCTTATGTCGCTTTGCAAACTGCCCATCCGTTTCAGAAAACGGTTTACGAGAGGAAAGC  
CCCAGTATTTGTGTTAATTCCC GGTCAGCTATCCCACCCCGATGGTTTCCTTGTGTTATTTCCC GGTTCCAAAACATCGCTA  
CGAGTAAGAGGGGGCCATTAAACAGCGACCGCCTGAACAGCGGAGACTTCCGCTGAAACGGTTCCGACCTCGCTTCCGCG  
CGGACCGTCACTAGTTACCACAGCCCAAAGTCATGAACTCCGCCATTTCTACAATTTCTCTTAATTTAAAAATATGACTTT  
ACCTTAACCC TAACCTTTACCACACTGCTAACCTTATGCCTAACCTTGAATTTAAAACAAAAAGCAAAAAAAAAAAAAAAAA  
AGAAGGAATTTGTGGCTGTAGAATCTAGTGGAACTTAGCTAGATTTGCCAGACAGCCAGAGTCATGGTAAATTTGTTTTG  
TGTACGTTTTGTGATCCCTGGCAATGTA AAAACGTTTTGTATATATTTTTTGGTGATTAGGGCTGCATGGCACAATAACCGGG  
TAACCAATGATTATGATGAAGACTGTCATGAAAATGAAAATAAGAGTCATAACCACCTAAAAA AACCACTGACTGAAG  
ACTGGACTGCTGGGCATTTGTGCAGTTGACTTTCGTTTCTGGACTCAAAAACTTGTATGAAACTTTTGTTCACCGTGTGA  
AACATCAAGGTGTTGTAGCAAAACAACTTTGGTTGCTAGGCAATTTACATTAGTCAATTTAGCAGACACTCTTATCCA  
GAGCGACTTAAAGTTAGTGCATTCATCGTACCCCTTTCCCTGCAGTCAAATGACCTAGTGGCTCAAGGGTAGAATGTTAT  
TCATATTTTTCATAATTAATAATAAAAAAAAAATGAAAATCTGGTGTTTTCTATGCCAAA TAGTTTTGTTATATTTCACT  
TCTGTGATGTATATAAAGTGAATATTTGGGATGC AAACTCAAATTAACATGC CACTATTTTACTGTACAGTGTACA  
GGTGCTTCTTTTTTTTTAAAGCCATGTGTGTGAGGTGTATACCTTTTTGTTTTCAAAGTAGATTTGTTTAAAACTAAT  
AAGAAAACACTGTGTGACCCTGATTTAGCCC ACTGCAGTATTAAGATAGCTAGGTTGGACAACAATATATCACAGTCATTTG  
TAAGTACATTTTTCCTTAATAAAGTAGCTATCAGAAAAGTCTGAGTTAGTAAGAGGGAAAAGAGTTAAGTGTAGTTTAC  
AAAAGCTTCTTTTTTTGTTTTTACACAGAACAAAAATATGGGCTAGCCGTTGGCTGATGTC AACGTTGTGAACAGAGTGC  
CCCATGGTGGCGGTTGGGTTATGGTATGGGCAGACATAAGCTACGGACAACAACACAATTCGATTTTTTTCTATGGCAAT  
TTGAATGCACAGAGACTGTGACAAGATCTTGAGGCCAAATGTCTGCGGTATAATCGTCGCCATCACCTCATGTTTTCA  
GCATGATAAAGCAGCCCAAGTGTGCAAGGATCTGTACACACTTCTGTACCTGCATACTCAGCAGACTGTCATGTTCCCCA  
TTGGCGCATGTTCTGGATGCTCTGGATCAATGTGTTCCACCAATGTCCAGCAATTTCCGACAGCCATTGAAGAGGAGTGG  
GACAACATTTCCACAGGCCATAATTAACAGCGAAGGAGATATNNNNNNNNNNNNNNNNNNNNNNNNNNNNNNNNNNNNNNNN  
NNNNNNNNNNNNNNNNNNNNNNNNNNNNNNNNNNNNNNNNNNNNNNNNNNNNNNNNNNNNNNNNNNNNNNNNNTGGACTTTT  
TACTATAACA  
TTCCCGAAATGTAATTTTTTTTTTGGCTTTTTTAGCCATTTTTATGTAGACTAGATTGTGTGTATTGGATCATTGTCTTGGT  
GCATGACGCGAGTGCCTCATGCTCAGATACAGATGAGTAAAGCCAGACATTTCTCCTGTAGAATATAGTGATACAGAGCA  
GAATTCATGTTCTTCTGGTACGTCATCCAGGACAGCAAGCAATCCCTAAACAACACTACCACCCTCATGTTTGACC  
ATTTGGTATGAGGTTCTTAATGTGGAATGCAATGTTTTGGTTTTTGGCAGGCATAATGTGACCCAGTTATGCTTTTTGAATCA  
TCTGTCCATAGAACATTTCTTCCAAGAGTCTTGATGATCATCAAGGTGCTTCCAGCTGTTTTTGGCAAACGTCAGTCAACT  
TTTAGGATGACATGGTCCCATGATGCTTGGCGAAAACCAACACTGCATTTCCAATACCTTGCAAAGGGCACCTAGTGGT  
AGATGGGTAAAAAAGCATAACATTAATAATCCTTTTGAGCATGAAGTTATTAATTTCCATCTCAGATGGTGCATCAA  
TACACCAGTCACTACAAGACTTTAAAAGAGAGTTAATGGCTGTGATAAGAGAATTGAGGATGGGACATTGTAGTTACTC  
TAATTGACGGAGTAAAAGGCTTTGTACAGAATAAAAAATTTCCAAAACATGCATTTCTGTTTGAACAAGGCACTAAA  
GTAATACTGAATACAAAACCTTAAGTTTGGGGCAAATCCAACACATTTCAAGCATGGTGGTGGCTGCATCATGTTGGGT  
ATGCTTGTGACAGAAAACGATTAGAGCTAAAACAGGCAAAAAGCCTAGAGGAAAACCTGGTTCACTGCTTTCCAGACAGA  
CACTGGGAGACAAATCACCTTTCCAGCAGGACAATAACTTAAAACACAAGGCCAAATATACACTGAAGCTGCTTACCAAG  
ACATTGAATGTTTTTGTAGTGGCCTGGTTACAGTTTTTACTTAAATCAGCTTGAAAATCTGTCAAGATTTGAAAATGGCTG  
TTTTGCAATGATCAACAACCACTTATGATGCGCTTGAAGAATTTTTAAAAGAAATAATGTGCAAAATATTTCTACAATCAAGG  
TGTGCAAAGCTCTCACAGCTGTAATTTGCTGCCAAAGGTGATTTTAAACGTGACTGACTCAGGGGTGTGAATACTTTGTGTA  
ATGAATACTCAAGGAAAAGGTGTAGATACATGCGCAGAGCGCGCAGGTTGTTTATTAGTCTTCAAAAAGGCAGGA  
ATCTGGTGCACAGGCAAGCTATGTTGATACACAGGTAGGCCAAATCAAACACTAGCACTGAAGGCTGTAACTAGTTCTCACA  
AATGAGCTAGGAAAAGCTTAGCCGGGTCAAACGAAACAACTCACAAAAGGCACAAAACAGAAATGAACCTGATCTAAATA  
AGGAGCTGATGAGACCAGGTGAGTAACTAACACAGCTGAAATCAATGAACAAAATGAAAAGACAGGGCTACGTTCAAGAA  
GACAAAAGAAACAGAACACAAGGTTGACTAAGAAAACACAGAACCTTACAGTAATACACACACCACCTTGTATGGCTGAGT  
GAACCTCCCACTGTACCGGTCCCATAATGCAAGAGGGAAGGAAGAAAGGTGTAGGGTCTGAGTTATTGGTCAAGAGGTCAA  
ACTGGCCGGGAGAGCAGCTAGCTTTTACGTTTTCCTTTCCAGGGATGTAAGTAACTGAAAATGGAAGTGTGTGAAAGAG  
CCGAGCGGGCTTGCTGAGGTTTAACTCTTGCCCTCTGACATATATCCATTACGATGATCTGTTAGGACGAGAAAAGG  
ATGTTGTGCGCCCTCCAACAGTTGGTGCCACTCCGAGGGCTGATGTTGTTGAGGAGTTGTCTGTTCCCCACATCGTAA  
TTCTCTCAGCGGAGGATAACTTCCGAGAAGTAGGCCACAGGGATGTGATTTGGGAGGTGTTCCACCCCGTGTAGAGAGT  
ATGGTCTTACTTCCGAGGCATCCACTCCAGGGTAAAAGGAAGGGTGGATCAGGTGGCGAAGGACAGGAGCTGAGGT  
GAAGAGGCGTTTCAAGTGTGAAAGCAGTCAGAGCAGTATCAGTCCATTTGACGGGTCTGGGTCTTTTGGCTGATAAGGA  
CACTGAGGGGAGCGCAGTAGAACTGAAGTGCCGAATGAGTCGGCGATAGTAGTTGGAGATCCCAATGAAACGTTGGAGT  
TCCTTAAAGGTGGTGGGTTTGGGCGTACTGACGGCGGCTGACTTTGTTCTCCTATCCGCTGCTGACCCCTCCAGGTGTCAG  
TACGAAAACCGGAGGTTTACCAAGGTTACTAGGAAGGTGACTTTTTTCACTCCTTCAATAAAAGTTTATGGTTAAGGAGCC  
GTTGAAGAACCTTTTGCACATGCTGTATGTGTTCCCTCAGGGAGTTGGAGTAAATCAGGATGTCAATGTAGACGATG  
AGAAAGCTATTGATCATATCCTGTAAAACCTCATTCTAAAGGATTGGAAGACGGCGGGGCATTAGTAAGGCCGTAGGG  
CATGACCAGGTATTTCGTAGAGGCCCTATGCGGTGATAAAGGCAGTCTCCATTTCGTTCGCTTACAGTATACAGACAAGCT  
TATATGCACTTCGCAAGTTCGAGTTTGTATAGATGTTGGCGGGGGCCACTTGTTC AAGGGTGGGCTGGGACCATCGTCC  
CTTGGGCGATGTTGGTGGCAGAGTGGAGGCCCTTGATTTTGCTGAAGACATGCTGTACTGTGAGTATTAGATGCACGGAA  
GAGGAGCATGGCCCACTGCATTTGGCTCTGAAAGACTAGACGGGATGACGGAATCATGGAAGAGAAGTTTCGGGTTTCT  
CTGGGTGGCAGAGTTCTTCGCGCATGAGGTGGTGCATGGAGATACGAATGTATTGATTTAAATCCTGAAAGCTCACCACTA  
CAGGCCAGCTCCGCTGAAAGTTCCCTGTGAGCCCTCTTCGGTAGATTTGAAGTAAAGTAGCCGCACTCCATCCACTCCC  
TGCAGCCATGGTGCAGACCTCGAGGGCATACTCGGCAGCTGAATGTCATCCTTGTGAAAGTTCTATGAGGAGGTCTCCTA  
TAGGACGACCGGAAGGAGAGTATCGAATACCTCTTTTAAAGGGTGTGAAAATGGTTCTGTGCTGTTGGCAGTCCATAT  
GGCGGTGGCCCAATCTAGGGCTTTGCCCTGTGAGTAGAGACACAACAAAATCCACCCCTGCTTGTGCGGTGGCGAAGTTAG  
TCAGGTTGTGCTCAATGTATTGCTGTATTTAAATAAGGAGCTGATGAGACCAGGTGAGTAACTAACACAGGTGAAATCA



ATGAACAAAATGAAAGACAGGGCTACGTTCAAGAACACAAAGAAACAGAACACAGGTTGACTAAGAAAAATAACACAG  
 AACCTTACATTATGCAAAATGAGATATTTCTGTATTTTCAATAAATGTGCAAAATATTTCTGAAAACATGTTTTTCAC  
 TTTGTCATTTGGGTTCTTTGTGTTGATGGGTGAGATTTTTTTTTATGTAATCCAATTTCAATTCACGCTGTAACAAAA  
 AAAAGTGGAAATAAGTCAAGGGTTATGAATAGTTCTGAAGAACCTGTATACAAAGCTGTGTACTTGCTCAATAAACATTT  
 ATTTTATTTTATTTGCTCCGTTTTGGTGGGTGTGGCGGGGTGTGGCTTGAAACAATAAGTGATGATTTAAAGGCGAGTGGC  
 CATGCTGACAGCGTTCCCAACCCCGTTTTTCAACTGGTGCCTCAGAACAGCACCTTTCCGTTAATTGAACATTGCAC  
 ATCGTTTTGTCATATGAACGCAGCCCTAGTGTCTGCTGAGTACTTCCTTATGCCATTGAAAATCTTAGACATTGGTCTGT  
 CCTTATGTCAATTGAAAATCTGAGACACTGGCCGTGTCTGAATACCCATACTTGCTAAAATAGTAGGCATTTTGGGTATGTG  
 AAATAAACGTTTTATAGTAAGCCTATGTGAAATAAGAATACATTTTAGTATGCTTTAAAAATGCCAGGATGTCACTCA  
 AGGTTTCCCTAAACTCGGTCCTTGGGACCCCGTTTTTGTGTTGTTGTTGCCCTGGCAGTACACAGTTGATTCAATAATCAA  
 CTAATCATCGAGCTTGTATAATTTGAATCAGCTGTGTAGTGTAGGGCAAAAACAAAACATGCACCCCTTGGGGTCCGG  
 AGGACAGAGTTGGGAAACGCTTTTCATATTCTTTTAGGCTTTTCTCTAGTTGAATCTCTGCACACTATTGAGGAAGAT  
 AATCTGCTTACTGCATTTGATTTTTACTAAACAGTACGTTCTAAATAGTATGTACTATGATAGTAAACAGTATGCTGTTT  
 TAGTAAAGTAGTAGGAAGACAGATTTCGGACACAGCCAATATCCACAGGAAAGTAGGCCTTAAATCGACTTCCAACCGG  
 GATCTGTGTGGCTCTCATGTTTTGTTGAGCAAACAATGTAATAACATACACACAATGCATGCATATACTAGCGGGG  
 CGGATCCCAATCTGGGTCCTTGGGCACCAACCTCCAGGGGGGCCCCAACCAGGGGTTGAACAGAAATATTTTCCA  
 ATTTGAAACAGACACAATTTTTGTGTTCCACTGTTCCAACCAGCAAAATAAAAGTTCTGAACCAGTTCAAACCT  
 CCCAAAACCTCCGTTTATATCGTTTCTTACTGTTCTTTTTTAACTGTGATATCAACAGTTTTTTACATTTAGCTCAT  
 TAAATTACTIONTACCAATCAATAAGGATAGAGCAGGCAAGGTAGTTGTTACATGTGTGATGGACAGACAAGTGTAGACTA  
 TGCGCAAGATGCGACTGACATTTTTGTTGGTGGGGAGGGAGAGAGCGAGAGAGGGTAGTGAAGGAGGCTTGAAGTGTG  
 GGCATCTTGTATGACATGCATTATCTGAATTAGGTCCTGAAATTATACCTAAGAGGGCCGCTTCTATGAAAGAATTT  
 TGAATGTCCTTTAGCTAGCTAGCTAACAAGCTTGAGCTAGCTAACAAGCTTGTGTGTGCAGAGTTGCCACCAGAAT  
 TAAAAACACATTTGCCCTTTTGTAGTTAATAAATCTTGTGAAACATTTCTAATTAGGCCATTTGAATCTTAACCTA  
 ATTGAAAAAGTGAATTGATTCTTCTAGCTAATAAAAAAATCTCTCTTATCTTCTGAATCACAGATTCTAACACAGTACA  
 GTAGCCTATGCTTTGGAAGGGGGATGGGCAGGTAGCCTAAATACACACACTTACAAAGATTTTCCAGCTTGCAGGCAGACA  
 CTGGAAATAGTTTTCTGAGTGACAGAGTGTGAGCTTTGCATAGGCCTTACTGCGTTTTCTGTGGGACTTCACTGTGTG  
 CACAATTTAGGGCAAGTCAGTATTTTACCATATCATATTATTATGATATTTCCAACTCCAAGCTGTATAAACTGG  
 AATGCTTATTGGATTAAAGCATATCAGGTGATGTGATTTGTTGATGAGGGAGGGTGTGGCCTAAGGAGATCAACACCC  
 TATAATCAAGTGTGAGAATTATTTAGGCGACTTCTTCCAGGCAAAAATGGGCCAAAAAGAGATTTAAGTACTGCTG  
 AAAAGTCAAAAATGTTAAAAAGTATTTGAGAGGAAATGCGACACTTGTAAATTTGAAGTTGTTGGGCGGTGATCAG  
 ACCATCAACCGTTTTGTTGCAAAATAGTCAACAGGGTGCACAAAGACCGTTGTGAAAAAAAAGACGAAATTAAGTCCAA  
 AGATTTGAGAAGAATCAACCGTGAAGCTGCCAGGAACCCATTATCTCCAGTGTGTCATATCCAGAAGTCAACCTAC  
 CTGGAGTGGCCAGAAGTACAAGGTGTTGAGTGTGCTGAGACATTTCCAAGGTAAGGAAGAATGAAACCCGACCACCCTG  
 AACAGACACATAAGTTGAAACATCAGACTGGGCCAAGAAATATCTGAAGACAGATTTTCAAAGTTTTATGGACTGA  
 TGAGATGAGTGAAGTGTGATGGACCAGATGGATGGGCCCGTGGCTGGATCAGTAACGGCAAGGAGTTCCACTTCAAGAC  
 CCAGCAAGGTGGAGTGGGACTGGTATGGGCTGTTGTTAAGATGAGCTAGTTGGACTTTTGGGTTGAAATGAGT  
 GACTCAAACTCACTCCCAACTTGTCCAGTTTTAGAGAACACTTTCTTCAAGCAGTGGTACCGGAAAGACTGCA  
 TCTTTCAAGAAGTCAAGCATTCTTTCTAAGGCTAGCCAGTAAAGGCTTAAAGATGAAAGAAATATGACATGGGCACCCCTT  
 CCTCACCTAACCTAAACCCTATTGAGAAGTGTGGTCTCTTCTTAAACAGACGATTTACGGTGAAGGAAAAACAGTACACC  
 TCTCTGACAGTGTCTGGAGGCTGTGGTTGCTGCTGCACAAAAGTTGATCGTCAACAGATCAAGAACTGACAGACTC  
 CATGGATGGAAGACTTATGACTGTTATGAAATAGAGGGTGGCTATATTTGGTACAGATTTTGTGTTGTTGAATGTTTAT  
 TTATACATTTTGGATTGTTGTTTTATTTCTTACTTTAACAGATGAAAAATAACAAGTGAAGATGGGAACTTTTTGTGTT  
 TTCATTTAGTTACATAAATCTGACACTAATAGTTGCCAATAATTTGTGCACACATAGATATTTCCAAAGAAAGCC  
 AAAGCCTCACTTTTACTTTTCTTAAATATTGAGGTTTTAGAGTTTATCAGGTTTGTAGTTGTTCAAAAAATAAAATTAATC  
 CTCAAACATACAACTTGCCTAATAATTGTCACACAGTGTAGTAAAAATGCCTGCAACTTAAAGAAGGTTATTAAGTGG  
 GTTCTTGTGCTTTTTAAAAATAACAGTTATGTTCCGGAATAGTATGGATTACTTTTTGTATGTTTTATTTTGTCTTAAAA  
 TGTGTTGCTATTTTTCTGGTTTTTGGGGCTCTGCAATTCTACACATTTTGTGTCATGGCTTATGATGTGAGCAAAAGACAGT  
 TTAATAACACTTTCTTGTGGATATTTTGTCTAAAAATTTCCAGCATAATGACCAACCACCAAGCAACCAGTGAAGTAA  
 TCAAATGTAATAGTATTCACACTTGGCTTGCAGAGGTTGCTGAAAGGACCTTTCCAAACAATTTTTTGCATTTATGTC  
 GACGGGACTAGTGTCAAGTACTGACAGGATGATCAGGCTACATCAGAGTGTTCAGGAAAGTATTCATACCCCAT  
 GACTTATTTCCATTTTGTGTTTACATCTTTTTTTTTTTTCTTCCAATACAATTTTTTTTCTTCAACCATCTACACAC  
 AACTCATAATGACAAAGTGAACATGTTTAAAAATTTGTCACATTTATGAAAATGAAAATACAGAAATATCAGATTTA  
 CATGTTATTTACGCCACTGACTCAATACAAGTTAGAAATCATGTTTGGCAGCGATTACAGCTGTGAGTCTTTCTGGGTGT  
 GTCTTAAGAGCTTTGCACACCTGGATTGTAGAATATTTGCACATTTATCTATTTGAAATTTCTGCAAGCTCTGTCAAGTT  
 GGTTGTTGATCATTTGTAGACGCCATTTTCAAGCTTGGCATTGATTTTTCAAGCCAATTTAAGTCAAAAATGTAAC  
 TGAAGCCTCGAACATTCAATGTCATCTTGGTAAGCAATCCAGTGTATATTTGGACTGTGTTTGGATTATGTCTGCTG  
 AAAGTTAATTTGTCTCCAGTGTCTGTTGGAAGACAGACTGAACCAGGTTTTTCTCTAGGATTTTGCATGCTTAGCT  
 CTATTCCATTTCTTTTATCTAAAAAAACGCTCTAGTCTTGTGATGACAAGCATAACCATAACATGATGCAGCCACC  
 TCCATGCTTGAATAATGAGAGTGGTACTCAGGGATGATGTACTTGCCCCAAAGATAACACTTCGTATTCAGGACAT  
 AAAGTTCAATTTCTTGGCACATTTTTTTTACAGTTTGTAGTTTAGTGCCTTATTGCAAAATTTTTTATCTGTACGGGC  
 TTCCTTCTTTTCACTCTGTCAATTTATGTTAGTATGCGGAGTAACTACAATGGTGTGATTCATCATCAGTTTCTTATA  
 TCACAGCTATTTGAACATGTAACTGTTTTAAAAACACTATTGGTTTCATGGTGAATCTCCTGGTCCTTCTGGTTGAATC  
 TCTGTTTTGAAATTTACTGACAGACTGAGGACCTACAATCATTGTTGATGTTGTGTTGGGTACAGAGATGAGTACTGTTA  
 AAAATAATGTTAAACACTATTATTTGCAACTTATTTGTTGACTTTTAAAGCACAATTTTTTAACTCTGAAATTAATGTAGGCT  
 TGCCACAACAAAGGGTTGAATATATTTTCAAAAACATAATCCACTTTGACATTTCTGGGGTATTGTGTGTAGGCAGTGA  
 CACATCTCAAATTAATCCATGTTTTATTCAGGCTGCAGCACAACAAAATGTGGAAGGTTCAAGGGGTGTGAATACTTAC  
 TAAAAAGACTAGTCTCATTTTTTCTCACAGGAAATGCACCAACAGCATCAGCAAATATTGCAACATGATCGGTTAT  
 GGTAAATGTGACTACTATGATCTGACTGGCATACTGCTCTTTGGTGTCTAGTGTGATGATCTAATGATGTTTCTGTAACC  
 TACAGTATATCTCATGATATGGACCCAGAATAGGCCTCATCAACATGAAATGGCTAATAGGCCTTTGTAAGAGTTTCA

AGATATTTTTCAC TGTGGTGACTGTTCTGTAGGAATTTATACAAAAAATACATATCACATCTTAATTTAAGAAGTTAATTA  
 TTTGTTTATTATTCATTTATTTAAGTATTTCTATCTCCAAGATTCCCCACCCGAAAATAAATCCGGTTTATTTCAA  
 AAATGAAATGAAGGAATGTTATGTCGCCATCAAAGGAATGAATCAACAAAATCAAAGTGGCAATAATCATAATCATT  
 TTACAATAATAATTAATAATCAGAAATCCACATTCAAAACAAATTTACAATGGCAATACACTCTCAATATCAC  
 TCTTTCCATTAATATAACAAAAATCCCGAATGTCTGTCCTTTTTAAAAACAAAAAAAGAGGGGTTGGGGGACTATGGCTTG  
 TCAAGGGGTATGACTATGTGTGACTTGTGGGGTCGAAAGTTCAGGGTGAAGGAGGGTTGGCGAGTTGGAGGCACACTTA  
 ATAGAAGTTGAAGAAATGGCTAATAACATGGTGTACTTGCATGGAAGAGTTGCTTCACAAGTAACAGTGATCTGAAC  
 CAAACGTTTCAGCCTGACAGAGGGGCTATGAGAGGCAGAGTTCCGGGAACTAAATTTGGAAAAATTAGATAAGGGTTGCT  
 GGATAAATATATAAATCTGAATGACAACCATTGCAACATTTAATGTAGAGAAATGTA AAACTTAAATCAAATAACAACG  
 AAGAATCATAATAGTTACAGGAATTCAAAGAAAAGGAGATGGAGGTCAGTGGAATATTA TCTTAGTTATCTATATACT  
 GTATATGTACAAAATTGCTTGGTCCACCAAATATAAATTTTTAAAAATGCCTCAGTTGATGAGAAAAATGAGTGAAGCCA  
 GAGATTGTTTTGAGAGGCATAAATTATGTGTGCAGGTGTT CAGAGGTGT CAGATTGGTCAGTGTCTGCACACAAAGTGCTT  
 CCCAGACAGCTGTCCTTTAAATGGCAGTGTAACCTCTCCACTCCCCAACATTTATTCTTTGAGGAGTCAAATACGTCA  
 TTTAAGAGAGAGAGAGATTGAGAGGATTGAGGAAAAATCTGTACACCTGCATATACAAACAACTGTATATACACATAGA  
 CATAACATATATACACACACATATCCAGTATATACACAACACTGTACACACACTGTATATACACACACATTCAATCACT  
 TAAAAGGTATTAACCTCTAATCTCTCGCTCTTTTGCAGTGTCAATTTT CAGTGGT CAGAGGTGAAGGAGGGCACAGGGTT  
 TTATTAGTCTTCTGTGTGTCAGTGGAGTCCATACAAAAGAAATCAAATGGAAGTTATACAGAAACTTTGGCTCCAGAACTCGGC  
 CTCACACAGCTGGA AAAACATGATAGACTCGCATCTGCTCCACTAAGCTTACATCAGAGACAGAAATGAGAAAACAAAA  
 CGTGACGTTAAGGATGTCCTCTTCTAAGGAGTTTTAGATCGTCTGTAAAAGTGGAGAGCTCCCGCAGCTATTGTC AAGTAGA  
 AAAAAACACATCCATCTCATATCTCTCTTCTAGGGATTACAAGAGAGAAGTGGAGTGTACAGGTCACAGCAACGTGCA  
 AATCATTTGTGAGGGGAGCAGGTA AAAACAACAGTTTTGTTTTATCCGTCACAATCCAGGGCAATCGTTCTTCAAAAA  
 GGGTAATGTTCCATAAGATTGCTTTAAGAAAAATCAGTTGATATAAAATGTATTATTTCTGGACTGTCAATAGATACTAG  
 TCTTTGTCATTAACAGAAATAACATTTTGCAGGAGAAATTTCCAATGAATAGTTTTTTGTAGTACTATGGTAAGAAATAG  
 CGTTATATAGAAAATAAATCATAGCATTGTCTACATTTTTCAAAGTTTTAATTGAAGCAATATTTTTGTATTGATAGCAG  
 TTTCACTTGTAAATAGGCTGTGCATAATTAGTTTCTTTAAATGTAAACTAATAGAGATAAAAAGAAAGAAAACAAAACCA  
 AAACCATGGCAGATATGAACAGGAGCAGAAAAGTCTAAAAGTGAACATAAAAACGGAGGTGGGTGGTTAAGAATAGATAG  
 AAAGAGGAATGGGTAGATAGTGGGTGGACTATAGAAAATGGTAGGAAAGAAAAATGAAAGAAATTTGTGAGATCTTAGAAA  
 AATGTTAGGAAAGAAAAATTACAGCACCTTTGAAATGCATCTTACACACAGCAGCTCTCCGCTTTCAATTTGACTTACTG  
 CTCATCCCAAAAGGTTTATATCATGTCAATCTGCATAGCTGTTCTTCAATGTCTGTATGAGCCAACAAAAACATTTCCC  
 GAGATTGGCAGCTTTTAAAAGAAAATCAAAATCTTAATCACAAGCTCAAATACAGATTGTCCAGCCATCCAATCAGAG  
 AGAGAGAGAGCCCAAGTAAGTAGGGTAAAATAACACAGCAGATCCTTACATGGTTAGCTGTGGCTCTGACTATCCTTTTA  
 GGTCAAGGAGAAATGGACCAATGGCCCAACTTCTCCCTTTGTGCAGCCAAATCGCATCACGAGAGAGCGCTCTTGATATATGG  
 CCAGGCCATGCGGGCTGCCATGTTGCCTCAGCCAAATTAGGTTCCAGATTGTCTCCACGAAGCTGCGTGTATTGGCTAAG  
 GGGAGAAAAGGAAGACAGAGAGAGAAGGAACGGGGAGGTGCTTGTATGAGTTGCTATCCAATCATAGCCATCCCACTAGGC  
 ACAGACGTCATTTCAACGTCTAATTTTGTATGTACATTTGATTGAGTTGTCAACTAAAGTGAATTTAATCAATGTCAATGG  
 ATTTAGGTAAAATTTGGGTGAAAAAATACTAAATCCCTAACGTCCTTAATGAAATTCATAACTATTAGCCTTTTTTGT  
 TTAATGATGTGGAATCAACGTTGATTCAACAGTTTTTTGCCAGTGGGATAGATCTTGTAAATAGATGACCAACCACTA  
 TATCAGATGGCAGGCACTCCAAGTAGGATTAATCTCTTTGTGCAGTTTTGTGTTCTGCTCTGAGGCAAATATTTGTTTTACC  
 TGAGTCTCTCAATTTCTGCATCTCTGAGGTATATTAATGGCAATGCTCATAATCAACCAAGTGAACCTGTATAGTCCCATA  
 TCTTTACTCAATGCAGATGTA AACCCTAGCTGCTTTAAAAGCCATTTTATTACTGATATGTTTTGGCACTCGAAAGGTA  
 GCCATATTAGCTGACTTAACACAAGTTAACTACAACAACTCTCCCTATTAATAATCACAATTTGGTTAACTTTTAATTCA  
 AACTCATAGCTAAATCTCTCTCATATATCTGAATCTCATCCACTTTACATTATGGCTAAATCCCCTAGTACTGACCGACA  
 CAGCATTTGGCGGAGGCAATTTGACCTATACAAAAAGTGGCCGAATCCTAACCTGAGATCTGCATGTTAAACTCAGACTT  
 ACTCGTAATGCATGAAGAAAGTCTATGCCACATAAAAAATATAAAATCAAGTTAGGATTTGGCCCTTAGTAATGACTCTT  
 AATCAAATAAAAAAGTGAATAAGACTGGTGTGGGTTCTGCAAACCAGGACTGTCTGAAGCATGTTAATCACTTGAG  
 ACGCTAAGCCAGAGTAAGGAAGTTTTCCAAGTGTATAAAGCACCACCAGTGTGAATCTAAAAGGGCCAAAATAAACC  
 CAAATTCACATCTAACAAGATTACGATGGACAAGTTACACAAAAACAAGAGGACATGACAACACAGTATATCTGAAC  
 AGTTGACAAAGCAATGAATTCCTTTTAGTGCAGTGTGAACATGTTTTAGATTTGAAATACTCTTTACTAACGATGCCCC  
 AAACAATCTTTGTTTCTCAAAATGTTGTACATTAGCATTCATGCTCAGTGAATGGTACGTTAAGCTAAAAATAGT  
 CCTCGAGACGACATGAAGAAAGTCTATGCCACATAAAAAATTTGTCTGAGCGCTGTTTGACTACTGGCCAAAATGTCATT  
 ATCTGAGACCAGGCACTTAAGGCTAGACTTAACTGCTTACCCAAAAATAAGAATCAAATAAAATAGTTTATGTGGTACTA  
 AACAGAAAAGCCATGACAACAATTTTGAAGTGTACTAGGTGTTACAAGTGAAGTACGTTATATGCCTGGACACTGAAGG  
 TCCACAAATAATATCCCTTTGATATTTTCAACCCTTAAAATTTGCTGGTAAAATTTTTACCTGACAAGTTGTATTGTC  
 TCATTTGGTTTTAAGCACCTACTTGACCCAGCTCCCACTCCATTAACAATTTGCACACATAAGGACACGACACACACATA  
 ACAAACAAAAAAGACAAATACATTAAGAAAATAGGCTACCTTGACAATAACAGACAGAGTGAGAGAGACAGACATACAG  
 ACAGTGGGAAACATGAGAGGAGTGTATGACACACACACTGATTTGAAATGGCACTGTTTGTGTCTGTAGCACCAGT  
 TGATCACACATAGTTCGTAGATTGAGAAGAGAAAACATTTGCACGAGTCCAGTCCAGCAATGGGATGCTCTTAATTAAC  
 ACGTTTTTTGAAAACATCACACACTTTTCTTAGGCCATAGGGCATCTCTATGAAATCCCCAAAATGACACCGTATTCTGC  
 TTGTTCTGGACTCTGCAGTTAGTCTGTATTTCAAACAGCATAGTTATTTTTGGATCTTGATTAGACTGTTTATGTACTAT  
 CATCAGTTAAAATAA TCTTCTGTAAATATCATCTCTGCTTGTATTTGAAAACCTTGTAAAATACACTCAAAGGCCT  
 AAGGAAACCAGACTACAAAGCCAGATGACCACATCTCTACCAATTC AATTTGAGAGCTGGAGTTTT CAGGACAGGAAATG  
 ACTAGACCTTTATCGATGAATTTATGGGATACTACAGCATGTATATAGTAGGATGCTATTTGGCTACTGAGAAGTTTTTG  
 GGGAGTGAGCGTATATAGTTTGTCTTACTGTCTTTATTTGATTAACAACACACAAAGCAAAATCTCATATAGTCG  
 CTTTGGTTTTGGGATTAGGCTATACAGTGTATATGATAGTAGCTCTATAGTTTGTATCGATTTGAAACAGTACATGAGGATCC  
 CACAAATGTCACGATAAAGTGAAGGTATCATTATCTTTGCTGCAAGACAGATACTGACCAAAAGCCAGTTTGAGCATGA  
 TGAAATGAGGTCCATTTGAAAGCCCTTTTGTGTCTGTATGATAATGCTGAACGACTGTACAGTAAATGTACAATG  
 ACTGCTGCCCCACACATTTCTCTCTCTGTGTTTTGAGTACACATAAAAAGAAACGGGAAAGATTGCAGTCACTCATC  
 CTCTCAA AAAAGGAAAGTGTGGCAAGACTTTTTATTTGTTGCTTCTCTCTGATTTGGTTTTAGTGTGTTTTTG  
 ACCTGCTCCCTCTCTATGCCCAGTCTGCTGTGCAGTGTCTCAGTTGCCTCCGTGCTTGTACTGGGGAGGATGT







GTGTGTCCTACTGGCTGGGGTTACCCCATAAATGCCCCATAATGTCAAAGTGAATTATGTTTTTAGACATGTTTACAAATGA  
ATTAATAAAGTAAAAGCTGAAATGTCTTGAGTCAATAAGTATTCAACCCTTTGTTATGGCAAGCCTAAATAAGTTCAGGA  
GTAAAAATGTGCTTTAAGAAGTCCGATAATAAGTTACATGGACTCACGGTGTGCAATAATAGTGCTTAAACAAGATGTTTGA  
ATGACTACCTCATTTCGTACCCACACATACAGATAAGTTGTGCAGTAAATATCAAACACAGATTCACCCAGAAAGACC  
AGGGAGGTTTTTCAATGCCTCACAAAGAGGGGCACCTATTGGTAGATGGTTTTAAAAAAAAAAAGCAGACATTGAATATCC  
CTTTGAGTATGTTTTAAGTTATTAATTACACTTTGGACGGTGTATCAATACACCAGTCACTACAAAGATACAGGCATCCT  
TCCTAACTCAGTTGCCGAGAGGAAGAAACCGCTCAGGGATTTCCAGATGAGGCCAACAGTGACTTTAAACAGTTATA  
GTTTAAAGACTGTGATAAGCGAAAACAGACTGGATCAACAACATACAATAAAACTGGCCAAAAATGTGGCAAAGAAATTA  
ACAAGGCAAATATACACGGGATTTGCTTACCAAGACAACATTTGAATGTTCTGAAATGGCCAAGTTACATTTGACTTAAAT  
CGGCTTGAAATGTATGGCAAACCTTCAAATGGCTGTCTAGCAATAATCAACAACCAGCTTGACAGAGCTTGAACACTT  
GTTATAAATGCATGCAAAATCTTGTAACAATCCAGGTGTCAAAGCTCTTAGAGACTTACCAGAAAACCTCACAGCTGTAA  
TCGATGCCAAAGGTGACTCTAACATACAGTATTTTGTGACTCAGGGTGTGAATACTTATGTAAATTACATATTTCTGTATT  
TCAATAAAAATGCTAAAATAAAAAAACTGTTTTCACCTTTGTGATTATTGTGTGTAGATGGGTGAGAAATTTTTTTTAAA  
ATCCATTTTTAATTACAGGATGTAACAACAAAACGTGGAATAAGTCAAAGGGTATGAATACTTTCTGAAGGAACTGTAT  
AGGACATTATGCAGTGGCAACAGAGAAAGTGAGGACCAGGCAGCCGATGTGATTGGTGCAAAACCTGAGCAAATAAGATG  
AGCTAAAACAGAAATAGCAGACTTTTGTCAAACATTTCCAAAATAGTGGTGGTTTTGGACAGAGGATAACATATCA  
CCCATTGTCAATTTGCCACCATATCAAGCTGTCCGAATTCGGCAGAGAAAAGCATTCTGAATATCTTTATGCTTAAACATA  
CAACTAAAATTGATTAAACATTAATAAATAAATAAAATCCACAGGTGAAGTTTTCAAACATTTGGTGGTATGTTTTATT  
ACATAAAAATATGTACAGGGATTTATTTGACAAAAATAAGAAAGGGAAAAGGAATCAAACGTATGCACGTACTGAAACAT  
GGCACCAGTCTAAGAAAACAAATGAAATGTAACATGAGTGTACAGTAGAATTTCAAATAAGGCAGACAGTATTACATGGG  
TGATAAGTATCAAACCTAACCTGTATATCTATTTACTTCAAGTTCAGTAGTGTCTGTGTCAGGTCAGTCTTACATGC  
AGTCAAACAATGTGGCTATTTGTCAATATGAGGTGAGGACAGGTCAATGATGTCTGACTTGTCTGTACATAGAAAATA  
GGCAGGCGATGGGTGAGTCAAAGGTCAATGATGATGTAGTCAATTGTATGTACATCAACAGTAAACTTCTCACTATGTC  
TGTATTGTGCCATATCAATCCAAATGACTTTATTGACAGGTGATAAGTTATATCTCTATGAAAACCTTCAAAGTAACT  
GATGTAATATTATACATCTATACAGACTACCAATATTATGCTTGTCTACAATGCCAAAAGAGAGGCAATCTTATGATAGTG  
AACAAATTGTTGTCCACATCGTATCTCAAAAATGACTCTCTCAAAGCTCTAACTTTAGCAAACGACGACACCATTTACC  
ATTCGGTTTCCCTATGACTTACTGCAGATAAAAACCTTAAACCAACGACATACAGCAAAATATAACAGATATAAATCTTAA  
CACTTTAGATAAATGGCAGCAATATCCATCTGGCTACAGGATTAACAATTTCTGTTCAAATACACTATACAGCCATGTGTA  
AATCAAAGATATAAGTTATTAACATTTTTTACAGTACTGTATTGTATGGTATTTAGGGATTTACAGGATCCATGTCATCA  
ATGCAGAAGTCTCAATAAATTTATGTTGATATGGTCTCATTGTACTGAAATGGGACCTGAAAAACCTTTAAGTGAT  
GAGTCTGTATGTATGTTGTCATATGATAGATGTATCTGATGTAAGGTATAACATCACTCAATATATTTGTGTGCTGAA  
GTAGGCTACATGCATATATGTAATGCTTCTGTTCCATAAATGCTAAAATGTAATCTATTATGACATCTCGTAATGCTAA  
AATATGCTATTTCAATAGATTAATAAAGTTAATTACATTTGGTAATATCATAACAAAATGTACATATAGAATCTTAAAGT  
ATCCTTATTGGTATGGCTGGTACAGTACTGGTACTTCACTAGGATTGTGATAACATTTAGATAAAGTGTGTACACTAGC  
GTGCTGATATTTCTTGATATAATAAATCTGTCAATTTCCCTTAAAGAAAACATAACTGATACTCTAGAGCCACCAAGAT  
AAATCGCAAAAAGAGCTTTCAAAGAATATCTGAAGTCGTCTTCTAAGAAGAATGATGAATGACATTTGAAAAGCAATGAT  
AGAAGTTTGGTTTTGTAAGATGTAATGTAATTTCTTTGAGGAGACAGTGGATATAACTACTTGGCCAGTGAATTT  
GCTTGAACATACTTTCTACCATCAATAAATAAAAAAAACGCAAATAGTATCTCATTCAATGACAGCATATGAATCGGT  
CTTAAAACCTTGCAGCCGTCCACTACTTTGTAGAATCCTCTAGATTACCTTGTAACTGTAACAATGCCATCACCCAACT  
AACTTCAAAGGGGAGGAGAAGCTTGTCAATTTAGATGCTAAATTAGGTTACTCTGTGTCTCTTTACACATCATAAGATA  
GTATTTCCCTATCAAACCTGTGGTGCAGTTTGTAAAGATTTGGCATTGTTTATCTCCTCATGTCAAGCTGTTATGGTGATGAC  
AACAGATGTCACTACCTTAGTCTTTGTTTCAATGATTTTTAAAAAACAACCAATATGGCCTCATACTGTATAGG  
CGAGATAGAAGTCAATGATGTCACCTTTCAGTCCATTTAGTGTCTTTGATTCAATCTAGGTGAAATCCCTCAGTTT  
ACGATTTACGGAATAATCACACAGATGACACAGGTAACACTGAAGGAAAGAACTGTTTATGATGATGCAATGCAATAAAA  
TGGCTGCCAAATAGTGAATAGCACAAAGGCCTAACATGTCTTTTGGGTTCTTTATGCACCAAGTTATGGGGTTATGG  
ATGGGATTGGTTCCATTAAGTACAGCCAGGACTGTCTCGGTCTTCAATTCATTTCTTCTTCCCTGGAATGGATTAAG  
TAGCAAAGTTCCCTGTGACACATATCTAACTATCATTTGACAGATTTAGAAAGTGGACAAAAGCAGAACATTTACAC  
AAATAGTTTCCCTCTCAAGTCCCTCATCTCAAGTCAATTTGTCAACATTTAGTCAAGAAAGAATGTTCAATGAACATTT  
TCCTACTAAGGTTAAAACCAATTTGCCATAAGTATTTGATACATACATGAATTTTATCATATGAATGGATTTTCACTGT  
TGACTTCTCACCTTCAAATGAATGTGCAGTTAGTTGAACTGTCCATATATATATATATATATATATATATATATAT  
AGCTCTCGAGTGGCACAGTGGTCTAAGGCACTGCATCTCAGTGAAGAGGCGTCACTACAGTCCCTGGTTTCAAGG  
CTGTATCACATCTGGCCGGGATTTGGGGTCCCATAGGCGACGCACAATTTGCCAGTGTGACTGGGGTAGGCTATCATT  
GCAATAAAGATTTTGTCTTAACTGACTTGTCTAGTTAAATAAAAGTTACATTTGACTTTTTTTAAATTAATAATCCCT  
GCATACATTTGAGTGTGACAGGTTGAGGCCCTCCCATTAATTTCTCCATACATGAATGTATGTATTTTCAACTATACT  
TCTAGACTCTCATATACTGTATATTCGTCAAATTTCCAGATTTTCCAAAAATCAGCACCTGCCTAAAAGAAATTTG  
TGGATATTTCTGGATAAATGTAATCAGACAGTTTGTCTCAACAATACATTAATTTATTTTCTTCACTCCATTTTAGCT  
CTCTCCACACCCCTTCTCTTTCTCTCATCTCTCACTCCTCTTCCCTACCACCCCTTTTTTACCTGTTGATATTCTCT  
TAATTTGGGAGTCTTCTCCTACTTGTCTTGGCCGTAGCCTCTCTCGCTGTCTCCAGGGACTCTGGTATTGCGAGAGG  
ATCTTATTGGTCTGTCTCCTGGAAAGGAGCCTCTTCTCATACCTCCAGCTTCTGTGGGACATGATCAGTCGCTC  
CTTTAGGGAATGGATCTCCTCCTCGTATTCTTTTACCTGAGACAGACAGAGAAAAGAGAACGCATTGGAATAGAAAATG  
GTTGAGCAATTTGTCATACACGTGCAAAAGTCAACATGGAATATGGAGGCAACACATTTGTTTCCAGTGTTCACTAAAGT  
CTAAGGCACACCTTTATCCCTATTTCACTTGTCTACTACACACAAGATCTAGCTATGCTGTTATGAAAATAACTCCAG  
AAGGAGATATATTTGAAAATAAAAAATGTTAAGCACTGTACATGTTTATTAGCAACACCGCTAAGCAACCAACACA  
AATGTTCTTGGGGTTGACTGAACACACCTTCACTCGGACAAAGAAATGTGGTAAATGAGGAGTCTGCGGTCAAATATGAA  
TATGAGAGCTAAAAGTTGTTTATTTCAATGACTCACTGTTGTCAAGTTCATCCTCAGCTGTTTCTAAAATTATTTCATA  
AATAAGTGTCTCGGTACCATCTGTCTCCTACTGATAGACTTGGACTTGACTTGCATCTCCCTGACATCTGCATGTGATTAAGAA  
GGAGATATGACTCAGATCAGTGTACGGTCTCTAGTCACAGTTTGTGTGTAATATGCTGCTAAGTCCAATCTGCATT  
CCTTTGAGGCATCGTTTTGTTACTGTGATTTCCCTAGAAGATTGGGATTTCAAATGCCAAAAGCTACAGTATATTGTTAAGA  
CAATTATCTACTGTTTTTAAATATACACATTGCAAATGTCAAATTTAGGCTACCATCTTTGATTTGCAAAAAGCTGTGG



CTGATGGAAGGTTTTAAGCAGGTGCTGTTGCTGTGGTGTGTTGCTGTGTTGCTGTGTTGCTGCTGCGATTGCTGTATGGTTCGT  
 TGTAGTGCCTCCCTGTGGCCCCGTGGGGCCCTGGCTCTCCCTGACAGAGCTCTGCTGGTGTGGCAGTCCAGGGGCTGTGT  
 TGTCTTTGACCCAGAGCTGTTGCCCGGGTGCCTGTTGCCAGCTCCGTAGCCCCGACTCTGGCGATAGGTTGGCACTGGCC  
 GGTCTGTCTTAGCCGATGGTGTGGTGCAGCAGCGCACTGACAGACAGCTGATGGGAGGTCTGGGATTTGCACAGTTG  
 AGCGGAAGGCGGGGCGATGGAGCTCTGGCGCACGGGCTGGACTGTGGAGGGGGTGTGCCAGGGAGGAATGGGAGGTAC  
 CAGTCTGAGAGGCCATGCCATCTGCTGTTGAAGATTATCTTAACAAAGACAATTAGAGAACACCAAGTTATCCTGGCCT  
 TCCAATGTTTTAGATATTTACATTATGCTAATCCATTAATGTAGGCTACAAACAAATGTTGACTTAAATTTATTATCAT  
 GTAGGAGAGACAAAAGGCTAATTTGCACAAAAGTAGAACATGATTTGTAACACATTTCTTGACTTAAAGTTAATCCATAC  
 CTGCCCCGTGCATGGACAGTTCGCCCGGTGCGTAATCAGCCCTGCTGTAGTCGTGCTATAGCTGTGTGAGTGGATAATGG  
 TGGGTGGCCCAAGTGCCTGCCCGGTTCCTTAGGTGGACAGGTCCTCGCTGCGGGAGAACCCCCCGTGGGCGAACCTGG  
 GGGATGTAGCCCTGTGCGAGCACCGTGGTCCGGTCCGGGGCCAGAACGAGGGGCGCGGGAGATGGCCCTGCTGTG  
 CTGGTGGTGAAGGTGGGGTCCATCTGCAGTCCCGGTGGCCAGGTGAAACAGGGGGTCTGGAAGGAGAGCGGGTATCTCA  
 GGGCGCGGCCCTGCTGCTGCTGCTGCTGGACAGCGAGTGGTGGTGGTGCCATCTGGCTCAACTGGCTCAGCCGTAGG  
 CCCCCTGACATGCTGGATCCCCCGAGCCGGCCGAGTGGCGGCCCCCCGCCCCGAGCTGGCCGCTCAGGCCGAGCCAG  
 GCCTCCTCCACCCTGGCTGCTGAGCCCTCCGAAGCTGCCCATGCCGGTATGGAGGCTGGGAGGAGTTGAGCATGGCCA  
 CCGACTGCAGGTTAGACAGCTGTTCAATTGTGGAGTCCGAGGTTCCATCATAGATATACACTTTATTGACTGAGCAGC  
 CTAGACTAGATTGATAGTACACCCCTTGTGTGCCCAATTTCAAAAGTCCAATACGTTGATTAAGTGTTTTATTATCTATT  
 GAGAGGGGTGGTTGTATGGCTGAATTGCATGTCCCATGACTTACCCTAAGGTACATGCATCATTTTTCTATGAACGCAC  
 AGCTGCCATACTATCTGCAGTCTGCTGCCAGACTTGGCTACCACATGGAAAGGAGATGTGCAGTTCACATAGTTTTCTG  
 TAGAATAGGCTCCTAACAGATCTTAATTACATTTAATGCTATCAAAACTCTAGAATTCAACTAACCTTGTGGTCTGGCT  
 CAGTGATATCGGAGTACTGGTGCAGTAGGCAGGGTGGATCGGGCCAGGGGAGGGCGGGTACATAGAAAACGTCTTTG  
 GAGGCTCGATGTGGGTGATCGCGCTCTTGGAAACTCAGCTGAGCATGAGCAGGACGAGACGGCATGACCCCCCCACTGGACAC  
 ACCAGATGTAGGGGAAGCGAAGCGAGTGTATCTTGGAGCTTAAGAAAGGCAACAACACATGGCAACAGATGGAGAA  
 ACGATGACAAGGTTATAGGTGATTACAAGTTTGGCAACCCAACTACAGCTTATGGCGGGAAGGCAAAAATTTAAAC  
 AAACGCACCAACCAACCAACCTCCCTAGGGCTGGTTTCCCAACACAGATTAAACCTAATCCTAGACAAAAAAGTAT  
 GTTCAACGGAAATTCTCCATTCAACGTGTTTTTTTTGTCCAGGACTATACTTAACTGTCTTCCAGGAAATAGGCCCATAGG  
 ATTAATAAAGCCAGGGCACTACCTGTTGAGATCCTTCATCATGAGATCTGGAACCTCGAGGAGACTCCCTGTGGAAG  
 CTGGGTCTGAGAGACGCTCTCCGCTGTCTCTCATGGACTCTATCTGTCTGGTTCTGGTGGCTGGGCTGCTCTGCAG  
 GTGGGGTACCGCAGGGCCATGCTGATGTCAATTGAAGAGCGGGGGCAAGGGACCCAGTGTGATAATGGCATCTCTGGGT  
 TAGGGTTAGAAGACTGACATGAATACAAGTTAGCAATGACAATAGGAAAGCATTCAAATGGTCAATTTTTTAAGATAT  
 CTTTCTCTGAAAAATTGCAAGTATATTAATCATTTCCATTATTCTACTGACTCATACTTTTCAGATTCTGGTGTGTCAA  
 TACCACACATAGTTATTTTATTGTACTGATTCTAATTGGACTCAATCATTTTGAATAAACACCACATTAGTTATCTATA  
 ACTTGTATAACTTTTTTTATTGGTCAATATTTGTAGAGGTTATATTGTTAATATTTACCTGATCCCTACCTTGCTG  
 AGCTGGGCCATGACCTCCAGAGAGGCTGTGCAGTATGGACAGTCCCTGCCAGGTCGATGTAGCCCTCGAAGCCCC  
 CGCGTTGCTCACACTGTCCAGGTTGGAGATCTCATAAAGGAAGCTGTTGCATGGAGCCCACTCCATCTTAAGAACTCAT  
 TCAATGAGCAGATGACTCTCTTTCAACCAACTGAGGAGTGAGAGAGAGAGAGAAGAGATCAAAATGCTGT  
 ATACTCACAGAGATTACATCATTTGGTGGTTTTCCGGCACAGAAATTAGCCACCCCTGGATTAATAACTAATAGCATT  
 TCAATGGAGAATCTACATTGAGCAAGCTTTTTAGTCCAGGATTAGGCTTAATCTGTGTCCCAGAAAAACTCAAAAATAT  
 TACAAAAGTTTTTAGCATAAGCATAACATTATAAGTGTAGTGAATGAATGAACTGACTTGGAGAAGTTGGCCAGGTTCTG  
 CACCATTTGAGAGTAGGGTGTGGCTGGTGCAGTCTGCTCGTCTGGGTACTCCTGGGTCAGGTTGAACAGGGAAGGG  
 ACATGACGGCCGGACACAGGAAGCGAGGAAAGGGAGCCACTGATTAGCGGCTGCGATGTCCTCCCTCCCCCTCTCC  
 GCACAGCGCACCCTCCAGGCAACACCTCCTCAGCTCTCGAGGAAACACTGCAGAGAGATAAAAAATTCAGTG  
 GTTATTATCATTTGATAGGATTTCTGTTTTAGTCAGCAGTGTATCCCAACTACTGAATGCAAACTGGTGTCTCAACA  
 ATCAAAAATCTGTAATAAATCTTTGGTGTCTGTGGCTCAGGAGTAATCCTACTTAAATGAAAAAAGAGTACGCATCA  
 TATGTCTACTACTGACCAATGGGAGTTGACGATTTTGCAGAGTGTAGTTCGCAGCACATGCGGAGATTGGCTTGGTGT  
 CTGGAAGGACAGAGGGTGGTGTCCCATGGGTCACCTCGCAGTTCTCTTCTGATTCTGACAGTGCCTTATGAACTCC  
 CCTGAAACAAGCACATATCACTGACCATTAGGCAACACAGAAAGATAATGAATATATCACAACAAGAACAGTTCAACA  
 ACATATATTGAGTGAATTAATGTGAAGCATTCGAAGGCCACACTATTCATCTTGAGGTTACTTATGTTCAATCAGCTTG  
 AGGTACTCTTCTATGGCTTTGGTGGCCAGAGTGTCTCTCGAAGAATAGGTTCTCGGTCATGAATCATCTACCTC  
 ACACATCCGCATGTCCGAAAAGAAATCTGGGAAAAAACAAACACTCAACATAGCATAGACTTTCTTTTAAACATTTCA  
 ATTTAATCTATTGGTACTCTCAAATTCATTTTTGAGGATATAACGCCCTCTTCTCAGCTCAGAATGTAAATTTGTTATCT  
 CTTTTGGCTTATGGTTTGGTAAGAAAACCAAGAAGTAGTCAAACCTAAAGTTCATTTTTGTAGTTTACATAGTGTCTTAAAGAT  
 AGAATCCGCAGGTTGTTGGGGCCCCCATGCCGCCCTACTTCTCTGTTGTTTTCACCTTTGAACGAAAAAAGGGGAT  
 GAGCCCTGAACCGCTTGGGTGGCTTCTGGGCAAGGTGTGTCTTTGCACTAAATCCGTCTACTCGAACGACCCCTGCT  
 GCCATGCTCCGGAGCTGGAGAGGAAGTGAAGTCACTTGAAGCTACAGCCGCCAGAAACAAATACAGAGCAGAGGAAG  
 CAACATGCTAGCTAAGTTGTTGCGAGATAAACTGCTCTGTTAGCAGGGTCAGCATTTCAGAAAATGTAGACAGAAAACA  
 GCATTATTCTCTTCTGGATCTGAATCAACTCGACCACAAAGAGAAAAGAACGAGAAAAAGACTGCCATGACCAAT  
 CCAGGAACCGGATAAATAAGGAATTAATTTTTGAAAGGTGGAAGAGTGTAGTCCGAAATGGCCACCATTCTCATGAACAGG  
 TAGGTAAATGTTGGGTGGCTTTTGTAGCCTGTTTGTAGTACATTAGCTGCTAACCTTAGTGTTTCAATGTTCAAG  
 CTTTTCAACATGGCTACTTAGCTAGCTAGCCGACATCTTTGTATTTGGACTGTTTTGTACTCAAAGAACTAATGATAA  
 CTAACATACATCATGTATACACTGCATAAACCACACAAGATGCCCAATGCCCTTTATTTCAACTAGCTAACGTTAGCTAAGT  
 TACATAACGCTGGATATGCAGATCGTTGACATGATAGTGTGTGTGGTTTGTAGATGATAATGTAGCTAGCTAGTAGTGT  
 GACAGCATTTTCAACTAGGCACACCCAAACAATGCATCATCTAGCTATACATCCGGTACAGTGACATCACACAAACATT  
 TATTTCTCAGGGAGATACTGGTGGAGATTTCAAGGAAACCTGAGGTTGTAGAAAGTGTGGTTGGTGGAAAAATCCAAAAG  
 GGAGGTAAAAATATGCTATGGAATGTTTTGTATGTTTTGTGATTCAATAATAATTTGATTGGTAATCGACCAATGGAAG  
 CAATGTTTGCCTGTTGACACATTACCTACATAGCATGGCATTGAGTCTACCATGAACTGCCCAACTTCAAGGACTGAA  
 TGAATATCCAGTGTGGTCAGTAAAGTAAACAATGGCTCGTCTGCATGACATATTGGTGAACATGGGCCATCAAGTAATA  
 GAATGGTTACATTAGAATGACACATGTTACACTGGTTACATCGCAACACCACATCCTATGTATTTAAAGAAACGTTAT  
 GGCATGATCTATTTGGCAGTAATGCCCCCCCCCCCCCCCCCATTTAGCAGCCGAAGCAACAATCTGGTGAATTTGG





GCTATTGGTTAACTATTTCACTATCTGCATTGACACTTTTTTTGCATCTCTTATGACTCATCACATATGTTACTGTTTAT  
TATCTATCCTGTTGCCATTACACTTTATCCCTACCTTTATCCTGTACATATCTACCTCAATTACCTCATACCTCTGCACA  
TCGACTCAGTACTGCTACTGCGTGATATAGTCAAGTTACTCGTTACTCATGGTGTATTTATTCCTCGTGTATATTTTT  
CAATTTTTTCTCTGCTTTGGGAAAGCCTGTAAAGTAAAGCATTTCACCTGTGAGGACTACACCTGTGTTTACGAAGC  
ATGTGACAAATACAAATTTGATTTGATTAGGGGATGATTAAGTCAACAAGGCAACTGGCACCATGTGGCCAAAAAATGC  
AACCCTGTCAATATTTTTCATTTAAATGTCGGTACACACTTCTTGCCTAAAGGGACTACCCTCTGTTGATAGCTCCCT  
ACAATCTCACTAACAAATCGAAGTGTGACAAGGGGAGTGAATACAATCAGTCATTGAGGGCACAGAGACCAGAGATCT  
TTCATAACGGCAGGCCAGTGGAGTTTTTTTTGAGATACACTTGGCATTATCTGATTCTGAAAAAATTAGAAACAGCACGC  
AACCATTCTGCTTTTCATGCCAAAGGAATCCGTCTGTACTCACAAATCTGTGTTATGTGAGCTTAAAAAGAGGTCACAT  
CAAAAAACAATGCGCTGTAGTCTCAAAATGGATCTAAATTGTCATCTGAAGAAGTAAACATTAGCATTCAATTAGAGT  
TTCCTGGATTAGATTAGATTTGAGCATAAACCAATAGTGTATCATGATAGTTCTTAGACAACAAAGCTATATTTCTA  
TTGACAGCCATACTTACATGCATAAGGCACAGAGCAACACGTGCATAGAATTGTCCATGACGCTTGGCCGCCATGCCCG  
CCCACACTGACTTATACATACAGACACACACACCGATTATGCCACAATGCCACTGAACTGAAGAGGAGACAGATACAG  
AATGACAGAAAGGGAAACGACAGAGACCACAACACAGAAAAGCAGAGAAAAGAAAGTACAGTGTCCCTACTATGATGTC  
CCTGATGCATCCAGCCCTCTCACGTTCTCCCTGTGCCACTGTTTTTTGTGGACATTCACATCATAATGTGCATCAGCACATA  
GAATACTTACAGTGGAGTGGGAAAGAGAGAGAGAGAGACAGTGGCGGTCTTGACCATTTCAACTGGGGGGGCCAA  
GCTGGGGCCAGTTGACTGTAGAGGGGCCAGTTACATTAGACGTTAATGTTGTCATATCGTTTTCTTCACTGATTATCA  
GGCATTTATCAGGCAAAAGACCATGAATAATCGTCATCGTTGCCACTTCTAATAACGGATGTAATAAAGAAACGATAGCA  
AAAATTAGTTTCTTAAAAATTATTTCACTCCACATTTAGGGGGGCTACAAGGGGTCCAAAATTGTTGTACAGGGGC  
ACTGGCCCCCCCCCTGGCCCCCTGCCAGAACCGCTAGTGGAGAGAGAGTGAAGAGAAAGATAAGAGAGAGATGTGGAGAGA  
GAGATAAAAATAGATCCAAAGAAATGAGTCAGAATGCGAGAAATAAAGGACAGTGGGGGAGGTGAGAAAGGGAGGGCGA  
GAGGGCAGAGAGACAGAGGGAGAGAGAAGGAGAGGGGGAAGACGGTGGGAGAGAGAACTCTCAGAGGAAATCAAGTTA  
TGTAACCTGATGGTACTTAAAGAAAAGGGAGTGACAGGTCGATGAGAAAACAGAGAGAGACATAAGAGAGATAAG  
TTGAAGTCGGAAGTTTACATAACCTTAGCCACATACATCAGTTTTTTCACAATTCCTGACAGTTAATCCTAGTAAAGT  
TCCCTGTTTTAGGTCAGTTAAGATCACCACTTATTTTAAAGATGCGAAATGTGAGAATAATAGTAGAGAGAATATTTTA  
TTTCAGCTTTTTATTTCTTTCATCACATTTCCAGTGGGTGAGAAATTTACATACACTCAATTAGTATTTGGTAGCACTGCC  
TTTTAATTGTTAACTTGGGTCAAACGTTTTCGGGTAGTCTCCATAAGCTTCCACAATAAGATGGGTGAATTTTGGCCC  
ATTCCTCCTGACAAAGCTGGTGTAACTGAGTCAGGATGTAGGCCTCCTTGCTCGCACACGCTTTTTTCAGTCTGCCCAA  
AACTTTCTATGAAATTTGAGTCAAGGCTTTGTGATGGCCACTCCAATACTTGACTTTGTTGTCCTTAAAGCCATTTGCG  
CACAACTTTGGAATGATGCTTGGGGTCAATGTCCATTTTGGAAGACCCATTGCGACAAGTTTAACTTCTGACTGATGT  
CTTGAGATGTTGCTTCAATATATCCACATCATTTTTCTCCCTCATGATGCCATCTATTTGTGAAGTGCACCAGTCCCTA  
CTGCAGCAAACCACCCAGACAACATGATGCTGCCACCCCGTGTTCACGGTTGGGATGGTGTCTTCGGCTTGCAGCG  
TCTCCCGTTTTCTCCAAACATAACGATGGACATTATGCCACACTCTATGTTTGTTCATCAGACCAGAGGACATTTCT  
CCAAAAGTCCCCATGTGCAGTTGCAAAACCGTCGTCTGGCTTTTTTATGGCGGTTTTGGAGCAGTGGCTTCTTCTTGCT  
GTGGCGCTTTCAGGTTATGTGATATAGGACTCGTTTTACTGTGGATATAGATACTTTTGTACCTGTTTCTCCAGCAT  
CTTCACAAGTCTTGTGTTGTTCTGGGATTTGATGACACTTTTCGCACCAAAGTACGTTTATCTAGTTGACAGAAC  
GCATCTCCTTCTGAGCAGTATGACGGCTGTGTGGTCCATGGTGTTTATACCTTGCGTACTATTGTTTTGTACAGATGAAC  
GTGGTACCTTCAGGCGTTTGGAGATTGCTCTCAAGGATGAACCAGACTTGTGGTTCTACAAAAAAAATTCTGAGGCTTG  
GCTGATTTCTTTTGATTTTCCCTTGATGTCAAGCAAAGAGGCCTGATTTTGAAGGTAGGCCTTGAATAACATACAGAGG  
TACACCTCCAATGGACTTAAATGATGTCAATTAGCCTGTCAGAAGCTTCTAAAGCCATGACATAATTTTCTGGAATTTTC  
CAAGCTGTTTAAAGGCACAGTCAACTTAGTGTATGTAGACTTCTGACCCACTGGAATTTGTGATACAGTGAATTTAAAGT  
AAATAATCTGTCTGTAAGAATTTGTTGAAAAGTTACTTGTGTATGTACAAAGTAGATACTCAACCGACTTCCAAAA  
CTATAGTTTGTAAACAAGAATTTGTGAGTGGTTGAAAACAGAGTTTAAATGACTCCCACCTAGTGTATACAACTTC  
CGACTTCACTGTCTTCCGTTCTGTGGCCATACGGCTGTCTGATGTTGCCATGGAGAGGTGAGGACTTTTTTTTAA  
ATCTTCCATTGGTATTCTCCATGTATTAAGCTGTCAAAAATGTAATGTACTATGTAAAATGGGAGTGCAGCAGCACTGAAAG  
GGCAGTTGTGAACAACACTTACTGTCAAGGCTTACTGGTTTCATTAAGCTAGGAGTAATAGTAAAGCACAGTACA  
TGCCAGATTGTCCTTGAAGGTATCCAAAATAGACACAAGAAAGCATCTTAAAGTCCCACATACATGTGGACACACAG  
GTAGGAGTCTACACACACACACTTAGACAAGTTAAGTGCCTGCCTGACCTGCTCCGGAACAGGGAGAGCAGGGAACAC  
ACACACACCTCACAGAAACACACAGACACACACACACACACACACACAGACACACACATAGTACACACACAGAGAC  
TCGTACTCTCTTGCCTGCGCCTACGGAAGCGGGGAGGATCATGTTGCGGAAGCTGCTGTTGCGGCTCCAGTTTGGGCTG  
ACTCTTAGCCCTCTTGATAGAGCCCTTCAACCTTCTACTGAGGAACTCTGAACAGGGCAGCCATGGAGAGAGGGAGGAG  
GAGGTGAAGAATGAGAGGGTGTGAACAGGGATGGATAGAGGGACAGAGGGAGGGAAGGGACGCAGGAAAGGAGATAGAT  
CAGAGTTGTAGAGAGGGGGAATAGGGTGAAGGAAAGATCGATATTTGGTGCACAAAATGGATTGGAAGAAGAACAGA  
GGACATATGTGATTTAGTGAATGACAGATGCATGAAGGGGAGAGCAACAGAAAGATTTNNNNNNNNNNNNNNNNNNNN  
NNNNNNNNNNNNNNNNNNNNNNNNNNNNNNNNNNNNNNNNNNNNNNNNNNNNNNNNNNNNNNNNNNNNNNNNNNNN  
NNNNNNNNNNNNNNNNNNNNNNNNNNNNNNNNNNNNNNNNNNNNNNNNNNNNNNNNNNNNNNNNNNNNNNNNNNNN







TGATTTTCATTGTGTTTCAAACCATTTCCAAAGGTGGGGGTAGACATGGCCGCCGGCGTCATAATGGTGTATGGCCCATCCC  
 CTGTGACCAATTTCCAACGTGTCTCATTTACTGAGTTTCGACTGTATAAGGCTCAAACCCTGTGAAAAGACTGGTGACA  
 TCTAGTGGAAAGCAATAGGAAGTCTCACTGAACCATGGTTAACGGTGTGATTAATAGGGAAAGATGAGAAGTCCGAGTCCA  
 CAATTCGAATTCACACTTGTGTTTCAATCGGCTCGGGGTTTGTACTGCCATAGGAGTTCTGTTATACTCACAGACACC  
 ATTTCAAACAGTTTTAGAACTTTAGGGTGTGTTTCTATCCATATATAATAAGTATATGCATGTCTTAGCTTCTGAGTTTGA  
 TTAGTAGGCCGTTGAAAATGGGAACGAATTTTTTTCAAATGCGCTGTGGCGCCCCCTATCTAGGGTATCTCAAGAGC  
 ACCTNNNNNNNNNNNNNNNNNNNNNNNNNNNNNNNNNNNNNNNNNNNNNNNNNNNNNNNNNNNNNNNNNNNNNNNNNN  
 NNNNNNNNNNNNNNNNNNNNNNNNNNNNNNNNNNNNNNNNNNNNNNNNNNNNNNNNNNNNNNNNNNNNNNNNNNN  
 CTTTACTGAAGAGTGGCTTCTGTCTTGCACCTCACCATAAAGGCTGATTTGTGGAGTGTGCAGAGATGGTTGTCTCT  
 TCTGGAAGGTTCTGCCATCTCCACAGGAACCTCAGACTCTGTAGATTGACATTCAGTTCTTGGTCTCTCTCCCTGAC  
 CCAAGGCTCTTCTCCCCGATTGCTCAGTTTGGCCGGCGGCCAGCTCTAGGAAGAGTCTTGGTGGTTCCAAACTTTTTTC  
 AATTTAAGAATGATGGCGGTCACTGTATTCTTGCAGACCTTCAACGCTGCAGAAATGTTTTGGTACCCTTCCCCAGATCT  
 GTGCATCAACACAATTTCTGTCTCAGAGCTCGACAGACAATTCCTTTGACCTCATGGCATGGTTTTTGTCTGTACATGCAC  
 TGCAACTGTGGGACCTTATATAGACAGGTGTGTGCCCTTCCAAATCATGCCCAATCAATTGAATTTACCAGTGTGGAC  
 TCCAAATCAAGTTGTAGAAACATCTCAAGGATGATCAATGGAAACAGGATGCACCTGAGCTCAATTTTGAGTCTGATAGCA  
 AAGGGTCTGAATACTTATGTATTGCTGAAATGTGTGGCGATGCCAGCTATTTAAAGGGACAGGTGGCTATTTGAGACT  
 GAGTTTAAATTGAAGTTGAAGAAAGTTGCAGTAAATCCCTGACCCTAGCTCAGTGCAGAGAGATTTTGCAGAGGGAAG  
 TATTTTAAGACAACACCAATGTATGAAAGCTGACTTACACACTCAGGGCTGAGGAAGGGAACCCAGCCTACACAA  
 GAGATCCATGGACAACGCCAATCAAACAGGAGCTGTGTGCTACTGCTGTTATTATTGTTATTGCTCTATTTTATCTCT  
 CAGGATATATCACAGGATATGTGAGCACTTACATAATGTGCAGATTTGCATAGCTGCTCCGCATAAAAAGCTATTTTCTA  
 ATTTAGGCATGGTATTTTCAATGGTCTTCACTCCATTTCTTAACATGTCAATTTCTGGTACCTTGTAAATGATAAATTTGA  
 TCAGTAATCATTTTATAAAGGGGATTTTTTTTTGTCAAATTTCAATTAACAAGAGGATTTCTAAAAGACCCGCTCTTGAA  
 AAATGTATTGTAGCTAAGATGTTGATTATAAAAACGTTATCTTTAAATCACATTTGCCATAATTTTCAATAATACACAGC  
 CCCAAGGAATACATAATTTACTGTGCAGTAGCACTCTACTCTGCTGGTTGTTACGCTTATTAAGAGCAAGGTGCACAA  
 TATATTTCCACAAATCTAACAATGTAGATTGATATCCATCTCATAACAAACGTTTATAAAAAGAAAATGTATACACTTAT  
 ACACACATTTTCGCAATTTGAATTACATTTATCAGAACTCCTATACAAACAAACATTACGGCTTTGACGTCAGAAGG  
 GAACTGTTGGTGGGGGAGTACACACTGATCTTTTTTGCAGGATATCATGGTAGTCAATGTTTGTGTTTAGCCATTATACC  
 TGGGTTTACTGCTGTAGTAGTAGCACTCAGGTTAGCATGTCAATTAGCTATAGCTACAAATCGGCCAACACAGAGTCTTA  
 GCCAGTTCCGTTATAGATGTTCAATGTCTATTATGATGATGTAAGGTTTATCTTGATTTTGTGTAGCAGATTTTGTGTAGC  
 AGATTTTGTGTAGCAGGTTTGTGTATCAGCGAGAAATGCTGATGTGCTGAAGTGCATAAAGTACGCTGTTTCAAGACT  
 GCTAGTGGTTAGCTAGTAGGGGTAAGCCAGGGGTGAAAGGGGGCTATGCAAAAAGGCCAGAGAGCTGTATTAGTGTATTAT  
 TTTTTAATGAGCGGATACAGAGTAAAAAAATCACAGGATATGATCAGATGATAAATGGCTTTATTCAGAGTGCCAAA  
 ATATATTTTTCTACAATAGTAGGACTCTGTATGATGTGGGATTTACCATCTTATGTAGGCAGTGGTTTCACTCCTACT  
 CCTGTAGTGCTCCTCTCATGTTACATTTCCGAACGCTTTTCCGACCTGACTTCGGTCAAATTCGATTAATAATAAATTT  
 TCTCAGAAAATACAAATGTAAAGTGATAGGGTATAAAAACAAATCAGAATGTTTTAAAAATAAATTTGAATTTCTACAATCTTC  
 CCTTAAAGTAAATAATAACTTGACTACTTGTCCACATGAAGTAGCTTTACAGTGAGGGAAAAAGATTTTGTATCCCTG  
 CTGATTTTGTACATTTGCCCAAGGCAAAAGAAAGGATCAGATCTATAAATTTAATGGTAGATTATTTTCAACAGTAGAGA  
 CAGAATAACAACAAAAAATTCAGAAAAATGCATGTCAAAAATATTATAAATTTGTTTTGCATTTTAAATGAGGGAAATAAG  
 TATTTGACCCCGTCTCAATCAGAAAGATTTCTGGCTCCAGGTGTCTTTTATACAGGTAACGAGCTGAGATTAGGAGCAC  
 ACTCGTAAAGGGAGTCTCCTATCTCAGCTTGTATCTGTATAAAGACACCTGTCCACAGAAGCAATCAATCAGATTCC  
 AAATCTCCACCATGGCCAAGACCAAGAGCTCTCCAAGGATGTCCAGGACAAGATTTGTAGACCTACACAAGGCTGGAAT  
 GGGCTACAAGACCATCGCCAAGCAGCTAGGTGAGAAGGTGACAACAGTTGGTGGGATTTATTCGCAAATGGAAGAAACACA  
 AAGAAGTGTCAATCTCCCTTGGCTGGGGCTCCATGCAAGATCTCACCTCGTGGAGTTGCAATGATCATGAGAACAGTG  
 AGGAATCAGCAACTACAAGGAGGATCTTGTCAATGATCTCAAGCAGCTGGGACCATGATCACAAGAAAACAAAT  
 TGGTGACACACTACGCCGTGAAACGCTGAAATCCTGCAGCGCCCGCAAGGTCCCTGCTCAAGAAAGCACATATACATG  
 CCCGCTGAAGTTTGCAATGAACATCTGAATGATTCAGAGGACAACCTGGGTGAAAGTGTGTGGTCTAGATGAGACCAAA  
 ATGGAGCTCTTTGGCTCAACTCAACTCGCTGTGTTTGGAGGAGGGAATGTGCCTATGACCCCAAGAACACCATCCC  
 CACCGTCAAACATGGAGGTGGAACATTTATGCTTTGGGGTGTTTTTCTGTCAAGGGGACAGGACAACCTTCTCCGCATCA  
 AAGGTTGGATGGACGGGGCCATGTACCGTCAAATCTGGGTGAGAACCCTCTCCCTCAGCCAGGGCATTTGAAATGGGT  
 CGTGGATGGGTATTTCCAACATGCAATGACCAAAAACACATGGCCAAGGCAACAAAGGAGTGGCTCAAGAAGAACACAT  
 TAAGTCTTGGAGTGGCCTAGCCAGTCTCCAGACCTTAATCCCATAGAAAATCTGTGGAGGGAGCTGAAGATTGAGTTG  
 CCAAACGTCAGCCTCGAAACCTTAATGACTCGGAGAAGATCTGCAAAGAGGAGTGGGACAAAATCCCTCCTGAGATGTGT  
 GTAACATGGTGGCAACTACAAGAAACGCTGACCTCTGTGATTGCCAACAAGGGTTTTGCCACCAAGTACTAAGTCAT  
 GTTTTGCAGAGGGGTCAAATACTTATTTCCCTCATGAAAATGCAATCAATTTATAAAAATTTTTGACATGCGTTTTTCTG  
 GATTTTTTTGTTGTTATTCTGTCTCTCACTGTTCAAATAAACCTACCATAAAATTTATAGACTGATCATTTCTTTGTGAG  
 TGGCAACAGTACAAAATCAGAAGGGGATCAAATCTTTTTCCCTCAGTGTACGTCATTTGCAAGAAGTGTGGGAACAG  
 TGATGTAACATGTTGCCAGAAAACAGTATTGATTTCTAGCTTAGCGGGCATAACAATTTCCATGAACCATCTCTCTGCCCC  
 TTTCCCCAGTGAATGTTCCCTGCTCATGTCCATGAACCGTTAAACAAAGCTACAGTAGCGCTCCATTTGTATTTCATTCG  
 TTGTTCCAACATTAAGACAGCAAGATGACTCAGCAATCTCTCCAAGACAAGCGGCAGCTTAGGGGTGGATTGCGAGTT  
 CCCTCAGTGACAGACTCACAGGCTCCCTGTATCTGCACTGTTAATTTTATATAGTCTCACTAAAACAACAATACATGT  
 TGTGATACTGCTACAGTACTACGTATGCTTCATGTGCAATTAACAATATTGAAGTGTCTTTAGTATTCCCATGTGG  
 TAGCAAAACAGAGATGACATAAATGGGGTGGCTAATGGGTTCGTATTGCGTAATGTTGCAGTAGATTTTTGGTGTCAAC  
 GGAGCTGAATTTGCTCAAACAAGATAAATCTGAAATAACAGACTACTAATCTAATAATAAATGCTAGAGAATAACAAC  
 TACGCACATGCATGTTAACTGTACTGAGGTGTTGATGGGTTGGCAGGTTAGCGGTAGCTGCTGGAGTATGCTGCAAAACA  
 TGAACCCTTCTGAGTTCCTACTTACCCTGACAGTTGTTTTGTCCCTGGTGGAACCTCAAAGACATTCATGTTGTTTT  
 AATGAGTTAAAAGGCTGGGGAAAATCCATAATTTATACTATTTATTATGATTCATTTTCTGAAAGTTATTGGAAGAGAAA  
 TTAGTTCAAGTTATACAGCTAGTGTGTACCTTTAAGATGGGATGTGGAACAACCTCTATAAATAAAAATATCAAATGAC  
 AATGTTGTCCAGTAGACGGAGAACAAAAGTTTATAATGGAGGAAAATACGAACAACACGTTGTGTTTTTACATTTGAAT  
 TCCATTCAGCCAAAGGCTATCAATCAGATAAGCAGTTAGCTAGCTACATTTATGTTTGTGATTTAGCCTGAGGTTAATTCA

TTCAGATAACATGGATTTCTCTCAATGACTGAGCAGCCGTGGTAAAAGTCAATTTCAAATGTAACACATAACATCAAAG  
 GCCAACTTCATTAATGCAGATAATCACATCCAATTTTGAGGAGGTTAATAAGAGAGAGCGAAAAAATATATTTTCTCTC  
 TATTAGCACGAAATGACTCTTTGAATGAACGTTATTGCAAGAGACCCAATAAGACCAGGAGCAGTGCACCTCAATGCCAT  
 TAAAGATTTAAAAGGATTGTTTCTCATTATATACATAAATCAAGTCCCTTTGCTGACTTTGCTCTATCAAATCAAAC  
 TTATTTGTACACGCGCCGAATACAACAAGTGTAGACCTTACAATGAAATGCTTACTTACAAGCCCTTAAACCAACAGTGC  
 AGTTCAAGAAGACTTAAAGAAAATATTTACCAAATAAACTAAAGTAAAAAATAATAAGTAAACAATAAAAAAACAACAAT  
 GAGGCTATATACAGGGGGTACCGGTACCGAGTAAGTGTGCGGGGGTAGAGGTTAGTTGAGGTAATTTGTACATGTAGGTA  
 GGGATGAAGTACTATGCATAGATAATAAACAGCGAGTAGCAGCAGTGTACAAAACAAGTGGAGAGGGCGGGGTCAATGT  
 AAATTTGTCGGTGGCCATTTGATGAATTTGTCAGCAGTCTTATGGTTTGGGGTAGAAGCTGTTGAGGAGCATTTTGGCCC  
 TAGACTTGGTGCCTCGGTACCGCTTGCCTGTGGTAGCAGAGAAAACAGTCTATGACTTGGGTGACTGGAGTCTCTGATA  
 TTTTATGGGCCCTTCCCTGACACCGCTATTATATGGGTCTGGATGGCAGGAAGCTTGGCCCCAGTGATGTAAGTGGC  
 TGTACGCACTACCTCTGTAGCGCTTACGGTCAGATGCCGAGCAGTTGCCATACCAGGCAAGTGTGCAACCGGTGAGGAT  
 GCTCTCGATAGTGCAGCTGTATACATTTTTGAGGATCTGGGGACCATGCCAAATTTTTTTCAGTCTCCTGAGGGGGAAAA  
 GGTGTGTGTCGTGCCCTCTTACGACTGTCTTGGTGTGTTTGAACATGATAGTTTGTGGTGTGTTGGACACCAAGGAAC  
 TTGAAACTCTCGACCCGCTCCACTACAGCCCCGTGATATTAATGGGGGCTGTTCCGGCCGCTTTTTCTGTAGTCCAC  
 GATCAGCTCCTTTGTCTTGTCTCACATTTGAGGGAGAGGTTGTTGTCTGTACCACACTGCCAGTTCTCTGACCCGCTCCC  
 TCATTGTGTGATCATGCCTACCCTGTTGTTTCATCAGCAAATTAATGATGGTGTCTGTTGGTGGCCAGCAGCTGTTGG  
 GTGAACAGGGAGTACAGGAGGGACTAAGTGCACACCCTGAGGGGCCAGTGTGAGGATCAGCGTCAGACAGTGTGTT  
 GTTGCCCTACCCTTACCACCTGGGGGCGCCCGTCAGGAAGTCCAGGATCTAGTTTCAGAGGGAGGTGTTAGTCCCAGGG  
 TCCTTAGCTTAGTGATGACCTTTGTGGCAGTATGGTGTGAACGCTGAGCTGTAGTCAATGAACAGCATCTCACATAG  
 GTGTTCTTTTTGTCCAGGTGGGAAAGGCAGTGTGGAGTGCATTGAGATTGCGTCATCTGTGGATCTGTTGGGGCGGTA  
 TGGCAATGGAGTGGGTCTAGGGCATCTGGGAGGATGCTGTTGATGTGGGCCATGACCAGCCTTTCAAAGCACTTCATGG  
 CTACCAATGTGAGTGTCTGAGGGCGGTAATCATTAGGCAGGTTACCATCGCTTCTTGGGCACAGGGCATGTGGTGGCC  
 TGCTTGAAACAGCCTGAGTTTCACTTGGTTAACGTCTGATATGGTAAACAGGGGTTTTGTGGTAGGTCAGACCTGCTCT  
 TGAGCTGTTTCAAATGACAAGTTAACACAAAATGTAATTTACCCTGCAAGTAAATACAGAAACATGCAACAGTACAGAGAC  
 AACCCAGCTACACAGTTTCAATAACTTCCCTTTATGGCTGAATGGCTCAGAAACGTGACATCTAACATTTTGCAGCAGT  
 ACACAACATACTAGAGGTCGACCGATTAATCGGAATGGCCGAATAATTAGGGCCGATTTCAAGTTTTTCAATAACATCGGT  
 AATCGGTATTTTTGGCCACCAATTTGCCGATTATTATATATATTTTTTTGTTTGTATTATACATATTTTTTTATTTTTTT  
 TTTTTTACATCTTTATTTAAGTACAGCAAGTGCAGTAAAGAACACATCTTATTTTTCAATGACGGCTTAGGAAACGGGGGT  
 AACTGCCCTTGTTCAGGGGGATTCGGGGATTCGTTTTGCAACCTTCTGGTACTAGTCCAACGCTTAACACAGCTGCC  
 TACATTTGCACTCCACGAGGAGCCTGATGGCAGGCTGACGACCTGTTACGCGAGGGCAGCAAGAAGCCAAAGGTAAGTTGC  
 TAGCTAGCATTAACCTTATCTTATAAAAAACGATCAATCTAACATAATCACTAGTTAACACACATGGTTGATGATATT  
 ACTAGTTTATCTAACGTGTCTGCGTTCATATAATCGATGGGGTGCCTGTTTCTTCTCATCGAATCACAGCCTACTTC  
 GACAAACAGGTGATGATTTAACAAGGGCATTTGCGAAAAAAGCAGTGTGCTTGCACCAATGTACCTAACCATAAACATCA  
 ATGCCCTTTCTTTAAAATCAATACACAAAATATATATTTTTTAAACCTGCATATTTAGTTAATATTGCCTGCTAACATGAAAT  
 TGTGTCACTGCTCTTGGCTTCAATTCGCTGGCTCATTTGCGAACTAATTTGCCAGAATTGTACGTAATTTATGACATACCAT  
 GAAGGTTGTGCAATGTAACAGGATTTTAGACTTTAGGATGCCACCCATTAGATAAAAATACGGACCTTTCCATATTTT  
 ACTGAAAGAAAAAACGTTTTGTTTTCGAGATGATAGTTTCCGGATTTTACCATATTAATGACCTAAGGCTTGTATTTCT  
 GTGTGTTTTATTATATTATAATTAAGTCTATGATTTGATAGAGCAGTCTGACTGAGCGGTGGTAGTCACCAGCAGGCTCGT  
 AAGCATTCAATCAAACAGCAGCTTTTTGTGCGTTTTGCCAGCAGCTCTTGCATATGCATTGCGCTGTTTATGACTTCAAGCT  
 TGTCAACTCCCAACATTAGGCTGGTGTAAACCGATGTGAAATGGCTAGCTAGTTAGCGGGTGCAGCCTAATAGCGTTTTCAA  
 ACGTCACTCACTCTGAGACTTGGAGTAGTTGTTCCCTTCTCTACATGGGTAAAGCTGCTTCAAGGGTGGCTGTTGTGCG  
 ATGTGTTCTGGTTCGAGCCAGGTAGGAGCGAGGAGAGGGACGGAAGCTATACTGTTACACTGGCAATACTAAAGTGCC  
 TATAAGAACATCCAAATAGTCAAAGGTATATGAAATACAAATGGTATAGAGAGAAATAGTCCATAAATCTTAAATAACT  
 ACAACCTAAAACCTTCTTACCTGGGAATATTGAAGACTCATGTTAAAAGGAACCACCAGCTTTCATATGTTCCCATGTTCT  
 GAGCAAGGCACTTAAACGTTAGCTTTCTTACATGGCAGATATTGCACCTTTACTTTCTTCTCCAACACTTTGTTTTGCA  
 TTATTTAAACCAAATGAAACATGTTTCAATATTTGAGGCTAAATGATTTTATTGATGATATATATTAAGTTAAAATAAG  
 TGTTCAATCAGTATTGTTGTAATGTCATTTATACAAAAAATAAAAAAATGGCATCGGCTTTTTTTTGGTCTCTCCA  
 ATAATCCGGTATCGGCGTTGAAAAATCATAATCAATCGACCTCTACAACGTACAACACTTTTTTACTCTATAGTGCTTATA  
 GTTTCATTTATGCTACTGCTACTGCAATGCAACCATTTAACACTAGTATAAATACAGTACCTCCACCATATGACAGCACTG  
 CTATTCAAGACAGATTCTTATACTCCACTATTGGCAGTACCACCCACACTGTCTGTCTCCCTATTCAATTTTTTTCCCT  
 TCATTTTTTTTTTTTTTTTACCATTCTTCCCCCAATTGGTAGTTACGATCTTGTCTCATCACTGCTACTCCCAGCGG  
 GCTCGGGACAGGGCAAGGTCAAGACATGCATCCTTTGAAACATGACCCGCCAAGCCACGCTTCTTGAACCCAGGCTGTA  
 GTGGCGCCTCAGCGTGAATACAGTGCCTTAGATTGCTGCACCCTCGAGAGGCCTTTGTCTCCCTATTGTAACACTG  
 TACCTTATATGTACCTAAAATATGTCCAGGGTACATAGGGTGTTTCAACACCATGGACAGAGGGCCCAACATGGGCTAAA  
 ATCCACCAAGAGTAGAGCTGTTTCAGTAACCTTGGACAGTCCGACAGAGCAAAGATTTTGGGTTGGTCTGTGTGGCT  
 GCATGCAGAACTTCTGTGGATAGGTTTATGTTGAAGTTCTAATTTACAAATAGATATTTGCATAAAAACATTTACAGCAC  
 TGCAATTATCTACCAAGATGAATGCCTTAATTACATGTTGATTGCTCCAACCTTTAACCATTTCCGTGCTTTCAAGGTGCA  
 ATACAAGGAAGTGGATGGGAAGTAGACTAATTGTGTCTGAGTAACCTTTCAGTATCCAATCCAAAGAGCGTACTGAAGTA  
 TCGTATGTGTCCTAATCATAGATGCAGAGCCAAATGCTTTCATCAGAGATGGTCATTACATCAGGACCCAGCTGGGATT  
 GTTGTCAAGTGTCTTCAATTTATCAAACGATGATAAATGAAAATTCACGTTTGAAGTATAGATACAGTACATAAACACAT  
 TGGATGCATAACCAAGATGGATAACAAATCAAGCTGTTTTTTTTATAACACAAGAGTAATCTAGACTTTTACTGTATGT  
 GTTCTTGAATGAAGCACTTAAGTGAAGTGAAGGACAAACATCGAAGGCTATTTGACCTATCCCCATAGAGCACTTGT  
 TGCTATCTCGATCGGACAGTTACGCTGCTATTTTTGATTTCCATGCTTTGTGTCTTTTTTTTTCTTTTTTTGAAAGTCTTGT  
 AAAATTTGATTTTTCAAAGATTTTTTTATACCGGTCAAACGTTTTTAGAACACCTACTCAATCAAGGGTTTTTCTTTATTTT  
 GTACTACTTTCTACATTTGAGAATAATAGTGAAGACATCAAACGATGAAATAACACATATGGAATCATGTAGTAACCAA  
 AAAAGTGTAAACAATCTAAATATATTTTACATTTGAGATTCTTCAAATAGCCACCTTTGCCTTGATGACAGCTTTGC  
 AACTCTTGGCATTCTCTCAACCAGCTTCAATAGTTAGTCACCTGGAATGCATTTCAATTTGGTAAAAGACCAGTCCCTA  
 TTATGGGAAGAAGCTCAAATAAGGAAAGAGAAATGACAGCCCATCATTTTTTAAGACATGAATGTCAGTCAATGCTG

AAAATTTCAATGACATCTTCAAGTGAAGTCACAAAAACATCAAACACTATGATAAACTGGCTCTTACGAGCCTCAGAA  
 ATTGCAGCCCAAATAAAATGCTTCACAGAGTTCAAGTAAACAGACACATCTCAACATCAACTGTTTCAGAGGAGACTGTGTGA  
 ATCAGACCTTTCATGGTCGAAATTTGCTGCAAAGAAACCTACTAAAGGATAACCAATAATAAGAAGAGACTTGCTTGGGCCA  
 AGAAACACATTTAGACCGGTGGAATTTGCTCCTTTGGTCTGGAGTCCAAATTTGAGATTTTGGTTCCAAACCGCCGTCT  
 TTGTGAGACGCTGTATGGGTGAACGGATGATCTCCGCATGTGTATTTCCCACCGTAAAGCATGGAGGAGAGGTTGTTATG  
 GTGTGGAGGTTGCTTTGCTGGGTTTACAGTCTATGATTTATTTAGAAATCAAGGCACACTTAACCAGCATGGCTATCACAG  
 CATTCTGCAGCGATATAACCATCCCATCTGGTTTGGGCTTAGTGGGACTATCATTGTGTTCACAGGACTATGACCCAA  
 CACGCCTCCAGGCTGTGTAAGGCTATTTGACAAAGAGTAGAGTGATGGAGTGTGCATCAGATGACCTGGTCTCCACA  
 ATCTCCCGACTTCAACCAAAATGATATGGTTTGGGACGAGTGGACCCGAGTGTGAAGGAAAAGCAGCCAAACAAGTGCTC  
 ATGCATTTGTTGCACAAAAATAATATTTTGCAGGAATCTCCTTGCGAATGATTTTGCCGAAGATTGTATCTCCGCCGCG  
 CTGGCACCTGAGCTTTGCTATCTATGCTATGTGGGAACCTCAAGTGAAGCTGGTTGAGAGAATGCCAAGAGTGTCGAA  
 AGCTGTCATCAAGGCAAAAGGTGGCTATTTGAAGAAATCTCAAATATAAAAATATATTTTGGTTTAAACACTTATTTGG  
 TTACTATATGATTCCATATGTGTATTTTTCATAGTTCAGTGTCTTCCACCATTATTTCTACAATGTAGAAAATAGTAAAAAT  
 AGGTGGTGTCTAAACTTTTACTGGTAGTGTAGATTATCCTTATCCCATCCAATCCACGTGTATGCAATCTACTCTCA  
 CTTTAGGATTATCCCAATGATGATCTCACTAAGTTATCTCAGTTCCAAGTTATGCAGTAGGTCACAGTCTTTCTGAAATG  
 GGTCACTGTGTGCGCAAGCATTTCCTTGACACTGACTGGGGGGCTTGCCCGCATGGGGGGCATCGATCCCATTCAGTAT  
 GGGACTCTCTCAGTGTGGTGGGCTCTACTGCGAATGGTTCTCAATGAAGGCTGTTTGTATAACATGCTATATACCCGAG  
 AGATGCTTAGAGTGTGATGAGCATCCTCTTCTGGAGTCAAGTAGGCTTGTGTAGCCTTGGCGTATAGAGAGATTTGCG  
 TGTGTAGACCTGAACAGGTTTATGTCAAAATATGGAGTGTGAGTGGCTATTGCAGTATCCCACAAGACTGTTGTGGGGAG  
 ATTCGCCCTATGTGGACAATGGGAGTGTATCAATGCTGAGACATACATGAGGCGAGAGAGCAGAGTGTAGAGAGGTGGAGT  
 AAGGCAAGAGGCGAGCAGAGACAATGAGTGTAGAGAGCGAGTAAAGAAAGACAATCACAAAATATCAGAAGTAGAAAAGGCA  
 GAGAAAGGTGAGAGCAGCCCATGAAAGGTAGAGTCAAGAAACAGAACTAGAATGAGTAGAACGGCCCTCCCATTCGAGT  
 CAATGACCCATAAATGGTGGACTGGCAGCCATTGGAGGGTCCCCATAAGAGTAAAGCGGGAAGTAAAGCAGGAAGTGA  
 CAACATTACATTTGCTTTTATGGTGTAGAGGTTCCAAAGCATTAGCTGTATTTCTATGGTCAGAGGAAATTCAGAGAGAT  
 AGAAGGGCCATGGCAACTTACCCATCTCTGGATGGTGCCTCCCTCAACAGGAACGCTGACTGTCTCCGCAGCAGCT  
 TGTTCCTGTGCAACTCGGAGCGCCGCTCGCGCATCAACAAAGGGTGTACCTGCATATGCACAGAGAGACAAGGTCAGGTC  
 AACACACACGCACAATGCATTAAGCTATATTTTTCAGAAGACCATAATGGATAGTATCTTGAATGTCTATCACTGAGCAG  
 NNNNNNNNNNNNNNNNNNNNNNNNNNNNNNNNNNNNNNNNNNNNNNNNNNNNNNNNNNNNNNNNNNNNNNNNNNNNN  
 NNNNNNNNNNNNNNNNNNNNNNNNNNNNNNNNNNNNNNNNNNNNNNNNNNNNNNNNNNNNNNNNNNNNNNNNNNN  
 CTGTTATGGGTGACCGATGATCTCCGCATGTGTATTTCCACCGTAAAGCATGGAGGAGAGGTTTATGGTGTGGAGGT  
 GCTTTGCTGGGTTACAGTCTATGATTTATTTAGAAATCAAGGCACACTTAACCAGCATGGCTATCACAGCATTCTGCAG  
 CGATAATACCATCCCATCTGGTTTGGGCTTAGTGGGACTATCATTGTGTTCACAGGACTATGACCCAAACAGCCTCCA  
 GGCTGTGTAAGGCTATTTGACAAAGAAGTAGAGTGTGGAGTGTGCATCAGATGACCTGGTCTCCACAATCTCCCGAC  
 TTCACCAAAATTGATATGGTTTGGGACGAGTCCGACCGCAGTGTGAAGGAAAAGCAGCCAAACAAGTGTCTATGCATTGT  
 TGCACAAAATAATAATTTTGCAGGAATCTCCTTGCGAATGATTTTGCCGAAGATTGTATCTCCGCCGCGCTGGGCACCT  
 GAGCTTTGCTATCTATGCTATGTGGAACCTCAAGTGAAGCTGGTTGAGAGAATGCCAAGAGTGTGCAAGCTGTGCATC  
 AAGGCAAAAGGTGGCTATTTGGAAGAATCTCAAATATAAAAATATATTTTGTATTTGTTAAACACTTACTACTATG  
 ATTCCATATGTGTTATTTTCATAGTTCTGATGTTTTACCATTATTTCTACAATGTAGAAAATAGTAAAATAGGTGGTGT  
 CTAAGCTTTTACTGTTAGTGTAGATTATCCTTATCCCATCCAATCCAGTGTATGCAATCTACTCTCACTTTAGGATT  
 ATCCCAATGATGATCTCACTAAGTTATCTCAGTTCCAAGTTATGCAGTAGGTCACAGTCTTTCTGAAATGGGTCACTGTG  
 TCGCAAGCATTTCCTTGACACTGACTGGGGGGCTTGCCCGCATGGGGGGCATCGATCCCATTCAGTATGGGCATCTCC  
 TCAGTGTGGATGGGCTCTCACTGCAGATGGTTCTCAATGGGAAGGCTGTTTGTATAACATGCTATATCAGATGCTTTAG  
 AGTGTGATGAGCATCACTCTTCTGGAGTCAAGTAGGCTTTGTAGCCTTGCCGTTATAGGAGAGTATGCTGTGTCAGAC  
 CTGAACAGGTTTCATTCAAAATATGGAGTGTAGTGGCTATTGCAGTATCCCACAAGACTGTTGTGGGGAGATTGCGCCCTA  
 TGTGGACAATGGGAGTGTATCAATGCTGAGACATACATGAGGCGAGAGGCGAGAGTGTGAGAGAGGTGGAGTAAGGCAAGA  
 GGCAGGCGAGAGACAATGAGTGTAGAGAGGCGAGTAAAGAAAGACAATCACAAAATATCAGAAGTAGAAAGGCAGAGAAAGGT  
 AGAGCAGCCATGAAAGGTAGAGTGTAGAAACACAGAACTAGAATGAGTAGAACGGCCCTCCCATTCAGTCAATGACGCC  
 ATAATGGGTGGACTGGCAGCCATTCGAGGGTCCCCATAAGAGTAAAGCGGGAAGTAAAGAGCAGGAAGTACAACATTACA  
 TTTGTGCTTTATGGTCAAGGTTCCAAGCTATTAGCTGATTTCTATGGTCAGAAAGAAATTCAGAGAGATAGAAGGGGCC  
 ATGGCCAACTTACCATCTGATGCTGATGGTGCCTCCCTCAACAGGAACGCTGACTGTCTCCGCAGCAGCTTGTCTCTGTG  
 CAACTCGAGCGCGCTCGCGCATCAACAAAGGGTGTACCTGCATATGCACAGAGAGACAAGGTCAAGGTCAGGTCACACACAG  
 CACAATGCATTAAGCTATATTTTTCAGAAGACCATAATGGATAGTATCTTGAATGTCTATCACTGAGCAGTAGCGGAGCG  
 TGGTTAACAATTTCTGGAGAAGCCAAGCCAGGAAAAAATCCTTATTTACAACCTAGATATTTGTGATAATTACCTAGCTTGT  
 CTCTATAACCTGTAGTTTCATATGCCTTGACACTGTGATTTATAGGCCTAAGGCTGAAACAATAAGAAGACACAGTGGCA  
 GAATAAATCAACGCAACTTTGTTTTCAATAAAAAACAGAGAGACAACATCTGTCCGGTGAAGTCCACAAAACATATGTC  
 ATGTAACAAACACTTACATGACCTACAGCATGGTCAAGCAAGTTCAATGTTTCTGACATTTTCCGACCATAAACACTAT  
 TGATTTAGAACCCGAGAGTACCTCAAGTTGCAAAAGAAAACAGGAGCTGCCTCCATTTATCCAGCACCAATTTAACTT  
 CTACATTTCAACAGAATCAAATCACCTATGCTAATGGTAAATTTAATACAGTGACAACATAAAAGATACCAAAAACAATTA  
 AGTCCAGTCAACATAAGCTAAATATGATGTGGCTATCCATGGTACTGATTTGTTGTGTGTGTGTGTGTGTGTGTGTGTGT  
 TGTGTGTGTGTGTGTGTGTGTGTGTGTGTGTGTGTGTGTGTGTGTGTGTGTGTGTGTGTGTGTGTGTGTGTGTGTGT  
 TGTGTGGGTGAATAACAAGGCTGTTTGGGGTGTCTGTTTCTGTTATTTGGGGTAGCTGTTTCTGGTAGTTCCTG  
 TATTTCCCGTAGCTGTTCTGGTAGTTCCTGTTATTTGGGGAAGCTGTCCAGTATTTCTCTCCGCTCATTGCATTAAT









ATATAGTTTCGATATCTTTTCTGCATGCTTATCTGGTTTTGGTCATTTAAGTTGACACTGAAACTGTTTTTCTATCCAATA  
AATATCCAATACATTTTCTACACAAAAAATCCTGTAATTAGCTCCCAATGACTGTAATTTCTCCATTTAAAGGGATAG  
TTTGAGATTTTGGCAACAAGCCTTTTATATACTTTCCAGAGTCCAGCTAGCATGCTAACTGTTCTCTGTAGACTCCAG  
TCATTGAACCTTTTTCAGACTGGACACAGAAACATAAAATTTGGTACACATGATGGTATTCTGTTGACAGTACAAAAAATTC  
ACAAAATATAATTTTTCACATTAATAAAATCCCCAAATGATTTTTCACAAAAAATATATTTTTTTAAATTCGCAGACCC  
CCTGCAGCACCTCTGCGGACCCTAGTTTGAACCCCTGAATTAAGCAACTGCACAGAGCTCACCTCAGGGTTTTCTACA  
GTACACAACGCTAACACATTAACATGAATGGACATATGCCTTTCATGGCAACAAACGTCCTAATCTCAACAGTATCTACC  
TGCAGCAGGCTACCAGAACAGAGCAGCCCGTACTGCCAGATTCTATTATTAATATCATTAATTTGAAATAGGTTTTAA  
TGAGAAGTGAAGGGATGAGATAGTAAGACAAACCCTAAGTGGTCCCAGACCCCTCTAGACTTGTCTGTGTATGTTACC  
GCATATTTATCTCATCCCTTGTGGCACTAAAACAACATACAGTAAATTTGACTTTGGGCGTCCAAGACCCTGTCTGTTTCA  
GTTATAAATACTGCAATACCTTCATTCATTTAGTAACTGAGTTTTCTTATTTTGGATTTCTCCTCATCTTTCTCCAC  
ATGTTCAAATGCTCTACATTCAGAGGGAGCAATGACATCATCATCACCCCAATTACCTTACACAATCCCTTCCCCTGAC  
TGAGCGATCTGATTGATTCAATCAACACAACCGTTATACAACCTTCTGTGTCATCAAGGTATCGGTGGTCATGTGGTGA  
CACATTTGCTGTCTGGGTGACAGTAGCCGTACAGAAGTACTTAGCTGAAAGGACAAGAAAGGGGACTTGGAGCAGACAAG  
ATTAACCTGTGTATCTGTAGCGATCAAATGCATGCCAAATAAATCACTTTTTGCTCAATAAAGTAGTCTCCCTCTGTCTC  
AATCAACAACATAACATTAATTTCCATTCAAAAAATTTAGTACTGGATAACTGATCTCAATTGTATATTTCCCCAAAA  
ACATAATTTAGATATGATCTGGTCACTTACCATTACTGCAACTCAATCAGGTAATACGATATGTTTTTACTGTTGTTAAAG  
TCCCTTGTGCCCTTATGCCCCGAGTCTACAAAATAAGTGAATTTAAGTATCTTCCCTGTATCAAGTTGCACAA  
ATATATAGTTGTGTCTTTTTTACTCTCTCATGTGAAAAAGGTCAACTGTAGAACCAAAATAACAAAACTGTTTTGAC  
AGCAAAGCTGTTGTAGAGCACTGATACTCTACCTCTGCATTACAGCACCCTGAAGTGGACAGCGACTGAATCGGTTTTCT  
GAAGTTCAGCCCCACATGTGAGTGAAGCGACTGTGTATAGTCAATGGCAGTGTGGAAATGATGGTAAGGCCATTATACT  
TTAACCTAGAAAGGAACCTGTACTGAAGAAAAATATAAACGCAACATGCAACAATCAATGAAAAAATGTATTGGTCCC  
TAATCTACGGAATTCACATAACTGGGAATACAGATATGCATCTCTTGTACAGATACCTAAGGGGCTGGATAAGATAAC  
CAGTACCACCAATTTGCCCTATGCAGCGTTTTGCCCTACGCAGACATACTGCCAAATTTCTAAAATGACTTTGGAGCGG  
CTTATGGTAGAGAAATTAACATTAATTTCTTTGGTAACAGCTCTAGTGGACATTTCTGCAGTGCAGCATGCCAATTGCACG  
CTCTCTCAAAATGTGAGATATCTGTGGCATTGTGTTGTGTGGCAAACTGCACATCTCAGAGTGGCATTFTATTGTCCCC  
AGTACAAGGTGCACCTGTGTGATGATCATGCTGTTTAAATCAGCTTCTTGATATGCCACACCTGTCCAGGTGGATGGATTAT  
CTTGCCAAAGGAGAAATGCTCACTAACAGGGATGTAACAAAATTTGTGCACAAAATTTATAGAGAAATTTCCATACGTTTTT  
GTGCGTATGAAAATGTCTATTTAGCTCATGAAACACGGGACCAACACTTTACATATTGCATTTATATTTTTTGTTCAGTC  
CATATAACCTGTGTCTCATGTTCTTCACTCAAACACGGGGTTATCCAGTCTGACATCTCGTGTGTTGGTCAACACA  
ATCTCAGTCAACTTTTCAACCCTAGCTAATATGAACACTACCACCTCGTAGGTCAAACAAAATGAGACACTTTGAAGCC  
AGTTCTGTGGTTAAAGTGAAGTGTGAATTTCCAGTGTAGTATCTTCATGCAGGAAAGGAGACTTCAAACATGGCATTGAAGC  
GAGAAGCTACAATTAAGTGTGTCTATAGGTGTCTCACACTTTCTCTCCAGCAGTCCATTTCTACCAGTTAGACTCTG  
ATCAAAGAGATCAGGATGTTCTGCCATTATCTCCACTCTCATACAGAGCAACTCAACTCCACATTCAAATGCCAAAAAGA  
GCAACAACCTGCAAGATAGACTCTCTGAAAAACACTAGGACAGGAGCTTCTCTGAAAAGAAAACTTACATAAAAAACA  
CTAGAAATTTGGATTGCATTTCCAGTCTCTCTCAACAATCCACTCCAATTTAGATGATTCATTTATTTGAAATAACAAAAG  
GCATATCACTTAAACATTGCAATGCAATGCCAGCAATACAGTTGAAATGCACATTAATTTTGTGTTGAAATGCAAAATG  
TGGTGCAGATGAGATGCTAAAATATAGCGACAGGCATGCAGAGTGAAGCTGTAACCTTTATGAGATCTTCAGAGTAGAAG  
TTAATCACTAAAATAAAAAACACACACAGACTCTCTCTTCTCTCTCTCTCTCTCTCTCTCACACACACACACGCACAC  
ACGCACAGACACACGCACACGCAAAACACACATACGCACATGTGTAGGATCTTAATTTGAGCCAGTTTGTACAGCAGGAA  
ATGTGGATTATTTATGTGGATTATAATCAATGGACAATATTGAATGGGTTGATACATTTTCCGTAAGGGCAAATCAAGTTT  
GAAATTTCAAAGTGGAAATTAACAACCTTACAGGACCTTTTACCTCAAATACACTACAAGTGTCTGTACACAAGCACAC  
TCACAAAACGCACACACACACAAAAGCATGCAGGCACATGCATGGCACACACACACACACACACACACACACACAC  
ACATCTTGTGAGCCTTGAATGCTAATCTTTTTTCTGAAGTATGACACTACCCTAAATGTGTAATGACTGCAATGCAAA  
TTAAAATGGTAATAGACTACTCTGAAATGTGAGGTTCCAATGGCACCCTCGTTGAGTATCAGCATATCAGTGTATTTGAT  
TACAGCTAATTAATAATGCACCATTCTTCTTGTGAGTATCTGCACATCTGTGAATGAGAGGTACATCGCGTGAATCCGG  
TCCTCTTTTCTCACACCTTTCAGTAAAAGTGCACACTGCATATATACGCCACCTATTAGCGTCAACAAGAGAGGAGGGACG  
AATTAGCCCATCGCTAGCATGGTATTGACGGTTTGAGAGCACATTTGAATTAGCCGTCTGCCTTTATAACACTGTAATAA  
GATGGCTGTAAGTCTCTGTGACACATTTATGACGCTCTGACTGGCTACTGTAACCTTTCCATAACCTTACGCCATATCAGA  
AAACAACTAACATTCAAATGCTCAAGTTCTATAGTATATCAATGATGATGATGAGGTTGTCTGACTGTCATGGCCCTGA  
TTTTGACCTAGGGATAATATGATGCACTTATACATTTATGACATCTTACATCAAGTGTACTTTGACTTCAAGAAAGTGT  
GAAATGTACACATAACACTGAAAATAGACTTCAAATGTCTGGGACTGAACATCTCAACAGGTGAGTGATTAACACCCTA  
CAGAGCAATACCTCTTGGTTCTTATGTAACCTCTGGGTTCCAGGTACGTACAAGGCTTCAGTGAACATTTCTTTGTGAG  
CCCAAATCTCCAATTTGTAATCCTGCTTGAGGCACCACAGTAGTGTTTAATAATCTGTCTTTTAGGGGGCACTTATCA  
CAGGCTGTACTATCAGCATCTCAAATGACACGGTGTGGAATTCAGACTCTCCCGAAACCTATCCAGGCCATTTATTTTA  
GATACTTTGACGGAAAAGGTCAGAAAAGGTTGTTGAAAAGCCCTATACTGTGCCGATAACTGAATTCATATAAATA  
ATATTAATGGACAGTATGGGTATAAAACCAAAAACATAAAAAGTAATGTTTCATCTTACAGATGTAGGATCTTAATTTGAGC  
CAGTTTGTACAGCAGGAAAATAATCTTGACAGCTGGAATTTGAATTTGTTATGTGGATTATAGTTAATGGACATTTT  
TGTAGGGGTTGGTGCATTTTTCGTAAGGGAAAATCAAGTCTGAGATTTCTAAGTAGAAATTAACAATGTCTTTTTAAACC  
TCAAATACACTTCAAGCTTGACATGTCTGTATTTTCAGGAACGTTCTCCTGCAACAGGCTGATCAAATTAAGATCCTACC  
TGTACATTACAACTAACATCACACCTTTAAACAATAAATGTTATTTTTTAATGATACATCTGCAAGTGAACCTGCTGT  
TTTTAGTTATAATCAGCTTTTTATGACATTTCAATCGTCCCTACAACATCCAATAACTGGTCCATTTTACTCCATGACT  
AATATAATTTGTTCTATTACTAATAATAATGACATATGACAGTAAAGTGTGTAATATCTCCAGGTGAAGGCACAACT  
GACTGTGCATCATGAGAACTCCCTGGAAATCCAATGACATAATGTCTGGAAGGCCTGTGAGCCCAACCTTATCCCGAATGG  
CAGCCCTCTGATTGGCTTAGGAGAGGAGATAGCTCATCTGACCTTTTTGCCATGAGTGAATCCTGACAGGATCAATCAAA  
AGACGAGCATCCTTTAAACACAACCTCATTGAGTCAATGGGCTCCAGGCTTTGCGGTGGAATTAAGTGGGGCCAC  
TCCATAGTGTGGTCTGCATTAAGCAACCTTTCTCCTAGCTACTCATTTCTGATGGGATCCTTATGTAGATTTCTCAG  
AATCAGCAGTAAGGCTTTTAGCGGATGGGGTATGTCTGGGCTTTTTACCACCAGGTTCAATCAGTACTGCTGGGGAACA  
GAGAGATAGTGAAGGAGTGGAGCCGTAAGTGGGCTTAGGGGATGCCGAACTCACTGCAGTACTGTTCAAGGGG





TCAAAAGTATGTGGACACCTGCTCATCGAACATCTCAGTCCAAAAATCATGGGCATTAATATGGAGTTGGTCCTCCCTTTG  
 CTGCTATAACAGCCTCCACTCTTCTGGGAAGGCTTTCCTCTAGATGTTGGAACATTGCTACGGAGACTTGCATTAGTGAG  
 CTCGGGCAATGGTGTGGGCAATTAGGCTGGCTCTGTGCAGGCCAGTCAAGTTCTTCCACACCGCATCGACAAACCAT  
 TTCTGTATGGACTTCGCTTTGTGCATGGGGCATTGCACATGCTGAAAGAGGAAAGGGCTTGCCCAAACTGTGGCCACA  
 AAGTTGGAAGCACAGAATAGTCTAGAATGTCATCGTATGCGCGTTAAGTTTTCCATTCACTGGAAAAAATGTCTTGAAC  
 CATGAAAACAGTCCCAGACCATTATTCCTCCTCCACCAAACTTTACAGTTGTCATTATGCATTTGGGCAGGTAGCGTTCT  
 CCTGGCATCTGCCAAACCAGATTCGTCCGGCATAACAGCCAGATGGTGAAGCGGATTCACTTCCAGAGAACCGGTTT  
 CCACTGCTCCAGAGTCAAATGGCAGCAAGCTTTGTAACTCCATCGGACGCTTGGCATTGCGAATGGTGTATGCTCGG  
 ACATGGAAAACCCATTCATGAACTCCTGATGAACAGTTCTTGTGCCAACGCTGCTTCCAGAGGCAGTTTGGAACTCGGT  
 AGTGAAGTGTGCAACCGAGGCCAGACAATTTTACGTGTACAAGCTTCAAGCTTCCAGCTCGGAGGTCCGGTTCTGTGAGCTTGT  
 GTGGCTACCCTTCGCGCTGAGCCGTTGTTGCTCCTAGATGTTTTCCACTTCACAGTAACAGCACTTTCAGTTGACCAG  
 GGCTGCTCTAGTAGGGCAGAAATTTGACAAAAGTTGACTTGTGGAAAGGTGGCATCCTGTGACGGTGCCACAATGAAAGTC  
 ACTGAGCTCTTAAGTAAGGCCATTCCACTGTCAATGTTGTCTATAGAGATTTTATGGCTGTGTGATGCTCAGCAACAGG  
 TGTGGCTGAAATAGCTGTGTCCACATACTTTTGTATATACATAGTGTATATCTGTCCACTCCATTGCCAATGATAAGTAG  
 ATTCATATTTGTGGAGACTGAGGTAGCATTTCTTACAGTGTGAGTTTGTACCATAAACAAAGGCATCAGTACTCTATC  
 CCATCTATCCTTTGCTTCTCAGTTCTCAGCACACCCCTCAGGTCTGTCAACCTCCAATGCTGGACTGTGACCCACAACAT  
 ATACAGTAATTACAGCATAGCTATAGCATATCCCTCCCTTACTAGCGCGTGTCCCTTTAACTCGAGGTGCTCT  
 ATCAATGTGCACTTCAAAGTCCAGCCACCTGCCAAAAGTGAATCGACTGCAAGTGCATTTGGAAAGCGCTCCCA  
 GATGCCGCATATCAGCGTACCTTCCCTCTCACTTTCCCTGGGATAACCAACCTGCCCAAGATGGCAGATGATTCATGT  
 CCGCTCAGGATACAACAGACTGCTGGAAGTGTGCCCCTGAAATACGACCGATCTATAACATTTATTGTCTCAGGATAA  
 GGGAGCCAGCCTGAGCAGTAGAATAAAGGATGTGTATTTCTGTTCATATAAATATATATTTCTAAACCCGTCACCA  
 TAACATGTTGTCATATTCGATCGAGTCATAAACGGTAAACAGCTTCAATTCATAGTGTATGAGGGGTAGGCTGGGCTT  
 TGAAGAACATGTAACAGACAACACTGGCTATAAGGAGAACCTTTTCCACACACTGACTGACTGTGACTGACAACATCA  
 TTCCAATGCCAGCCTCTTTGCTATGCAGTGAGGGGCTGTGTGATGGCTGATCTCTCACTGATGCTGTCTCGAGAC  
 AGAAGCACTGACCTGTGTCTCCATGATGCGCCGCTTTGATTTGCGTGACTCTGGCCCCACTGCTCTCCTCTGGCAGGGCA  
 GTGACAATGGGCTGCTCCACACAACAACAGAGACACAGTCAATAACTTGAGGAGTGGCGCAATGTTTTACTTAGAAA  
 ACTACAGTACCAGTCAAAGTTTGGACACACTACTCATTACAGGGTTTTTCTTTATTTTACTATTTTCTACATTGTAG  
 AATAATAGTGAAGACATCAAACATATGAAATAACACATATGGAATCATGTAGTAATCAAAAAAGTGTAAACAAATCAAA  
 ATATATTTTATTTGAGATTTCTCAAAGTAGCAGCCCTTTGATGAGACGCGGAGTAGGTGAATGGATGACCCCTTGAT  
 GTGTGGTCCCACCTGAAAGTGAAGCAGGAGGAGTGTGTGCTTTTTCTGGTGACACTGTCTAGTGTATTATTAGAAAT  
 TCAAGGCACACTTAAACAGCATGGCAACCACAGCATTCTGCAGCGATATGCCACCCCATCTGGTTTGCGCTTAGTGGGAC  
 TATCATTTGTTTTTCAACAGGACAATGACCCAACACATCTCCAGGCTGTGTAAGGGCTATTTGACCAAGAAGGAGAGTGA  
 TGGAGTGTGCATAAAATGACCTGGCTCCACAATCACCTGACCTCAACCCAATTGAGATGGTTGGGATGAGTTGGACC  
 GCAGAGTGAAGGAAAAGCAGCCAACAGTGTCTCAGCATATGTGGGAAACCTTCAAGGCTGTTGGAAAAGCATTCCAGGT  
 GAAGCTGGTTGAGAGAATGCCAAGAGTGTGCAAAGCTGCCAACAAAGGCAAAGGATGGCTACTTTGAAGAATCTCAAATAT  
 AAAATATATTTTGATTTGTTTAACTTTTTTGGTTACTACAGATTCATATGTGTTATTTCAATGTTTGGGCTCTC  
 CATATTTTCAAAATGTAGAAAATGTAAAAATGTAAAAATGTAAAAATGTAAGGAAAGCTGGAATGAGGAAGTGTGTCGCGCTT  
 TACTATATGTCAGGGTATAAATGTGGTGTTTTTTATTTTAAAGCCTATAGAGAATAAAGAGAAGATGGTGTGAGAGTGT  
 TTAGCAAGAGAATGAATATCCACATGCGAATGTGCACACACACATATGCACACACACTATAAATATGTATTTATTCATA  
 AAAATCTTCGTTATAAACATATTCACCAGAGTGAATAAGTGAGTCTTCCCTTAAATGATTTAATGAGGCACACAGGTG  
 CCTGTTTGTAGTTAGGAACAGTTGTTCTTATCCAGCTGGAAGGACCACCGTCTACAAGGTGTGCTCTTTTTCACTATTGTA  
 AATGTGTAATTAATTAAGTAAGTGTATCCATATAAAGAGTTGGGTCCTGAGGCATGTGTTGTGATGATGAGAGAA  
 TAATAACACAGAAGTGTCTTACTCTGACCTTCTCCTTTGGGATGATTTGATGGCGGGTCACTGATGAGGGGGGACG  
 AATCAGAGGTCAAGGAGCGGAGCTCGGACCTGGAGCCCAAAGAACACTTCTTCTTCTTGATCTTTTACCAGAGACA  
 AACCTGGATGACGTCACAGAGAAAAGACTTTCAAACCTGTAGACAACAACCTTTGTAAGTCAAGTCACTCGTTCTTTAT  
 TGCTATGTTTTCTTATCGTTCTCTATGATAATATCAAAGAGTTAAGAAAACAATTATCTAAGTGTATTTCTTTACCT  
 TATGTACAATTCAGAAAGCAACGCTATCATAAATCTGGTCAAGCATAGCTGTGGCTTCTATTTATTTCTCGCATCATATG  
 CAGACTCTCACCTGCTTTGTTAGAGTTCAAAGCCTGAGCAGATTGTGACAGCGATCTTGCCTTGGTGTGTCAGAGAGC  
 TGGGGACAGGGGAAGTAATAAAGTCAAGGATTTGATTAACACTGTGGATGGTAGCCTGAAACAAATGTTAACATTTAG  
 GAGACACTTGACATTCATTGGTGAAGGTAACACTTCCATGGATAACGTAAGTGTAGTTACTAATGTGATTTGTGTAACAG  
 TTCATTAAAAAAGTGTATGACTGATTTAAATGCAACTGTAGTACCTGAGAGCCACATGAAATACAAATGATATTTACCA  
 TTTCAAATGTGCTAAATAACAATGACAAGTAGCTAAAGTCAAAGCACATAATTACCACATGACTGCCTAAAATTTACG  
 CTAGCTAACACTTTTACATCGTTTTCATCATAGCACGTAAGTGAGGAAATATTTATACCAGCCTAGAAGCAAAGAGTCCC  
 AATTCCTATTGGCAACGACATGATTTTCATGGTTCGAAATCAAAGTATTTCTCTTGCAGCACAAGGAGAGGTGGTAGAGT  
 ACCAAATGGGCCAAATCTACCCTGTATTTACAATAAACACACCAGGAAAAGACAGTTAGTTTTCAGAAATTTTTCACATCACA  
 AAGCTTTTCAATTACATCATTGAGTAAGGAAATTAACATTTGTAACCCACATGACTCAATAAACCTGTCATAAAGAACT  
 GTTTTTCAAGGGTGTTCAGTGTGATAATCCCTGCAAGTTTAAATTTAATGTAAATCTTTTACGAGATCTGTATAGCTTT  
 ACCAGCTCATGGGTAGCCGTTGAATGTCTCTGGTCCGTTTGCACAGACTGAGCACTGGAACCTATAAAAACCTTTTACGGA  
 AAAAAAAGGAAACACAGATGATTTCTATTTTGTCTGTGATTGACCAGATATAAAGTCAATGGAACATGACATAGCAC  
 ATGGTTGCTACTGTAGCAAAATTTCCAGTTCCTCATTGTTTAGCAGACGTAACAACCCACCACATTCACCTCAA  
 ACATTTATTTTCTGTGCAGAAAACAAAGAGTAATATAATATATCATGGGCATTAACCAGTAGGATAATACAGATGGTTGA  
 TGTGACAATAATGGTGTAGCGGACTGGACTAAATTTAATTCATTTTACCTTACCCAGTTACATTTGGACACCAGAGG  
 CAGAATAACAATGCCTGCTATTAGCAATAAACACTAACAGATTAGCCCTACCCTGCCAGTTGATAACCTCTCTGT  
 TATGTTTTTGGACAATGGTAAACGCAAAGCAGTACAGGTTATAGATAAACAATACTCTGTCTCACCTGTCCCCATATAA  
 CAACGGCTTGGTCAGACACTGTGTGCAAGCTTCATGAAACCCTGACCACAACCTTCCACACTGCAACATTTTCAAGTTC  
 ACCTGCAAGTATTAAATAAAACATTAGCCACACTCCCAATGGCCTAAACATAGCTTACATCTGGTGGCTACCTGACAA  
 GAGTACACTATATTATGATTTTTTCAAGAGGCTGCAATACTCAACTGAAAAACACATTATGCTTGCAGTAGAGCTAT  
 ATAATGGTGAAGGACATANNNNNNNNNNNNNNNNNNNNNNNNNNNNNNNNNNNNNNNNNNNNNNNNNNNNNNNNNNNN  
 NNNNNNNNNNNNNNNNNNNNNNNNNNNNNNNNNNNNNNNNNNNNNNNNNNNNNNNNNNNNNNNNNNNNNNNNNNNNNNN





ATCTTCTGCCTATTGGCAACTTAGCTTATTCAAGCTTATACAACACTGTCCCTTTAAGACTAAAAAATGCTGTTTGCCTG  
 ACTAGCTTTTCAAAGAAGTCTAGAATTTTACACGTTTCGTGCTCTTGTAGGAAGCAATCACTCCCCTATTGCTGACTACA  
 AATGATCTATAACTGTGCGAACTCACTAAGCAAAAGGATATTAACAAAATGTGCTCACATGGCTACTTGCACACTCCG  
 CCTTGATCTCAAACAGCACATCTACTCAGCATCGCTCATGTGTAACACAGTTCAGTTCAAAGTAAATGGCACAGAT  
 CCATATATGGAATTGCTATTTGACACATAGGCCTACTGCAGCTCTGATTGGTTATGCCGCACAGGTCTGTTTAGAGTACG  
 GGCTGAGTCATACGTGCAATGTAATAGAATCCTACTCTGATGCGTTCTGCCTACAACAAAATCTCTTGCATAGTTAGTT  
 TTACTATGTTTCTTTTGGTTTGGTATGTTGCATTGAAAGTGGCTAAATATTGCATTGATTCAATCACCAATGCCACAGTA  
 AAGGGACATATTAATAGTGTAACTAACAGGGAAAACCTTCTCTCCATGGGCTCATATTTCTTCTGCCCTGCGTGGCAGT  
 CTCAGGGACTGTCAAGCCTGCACACACGCAGCTTAGAGGGAACTTTGGTTCATGAGGGAACTTTGGTTATGCACCCATTA  
 TTATAGAGGGGGTGTCCCCCCCCCATGAGTTGGAGCATTTTGCATTTTCAAACACCTGAAAATGTTTTCTCTGCAAT  
 CTAGACTATGTTAAAAAATAAATTTCTGAATAGTATTATCAAGCATACCTTTTATCTATTCAATTGCTATTTTAAAT  
 GAACTATGCACATTGATTCTTCAAGACCTTTTATACCTTAGGAGTTTAGTACAACACTACCACACTGGTATATAGTATCGTA  
 GCCCTAAATATGCTTCTCTGCATCTCCACTAAAATCTGGGTAAAAGATTGAAAGGAATTTGAGTCATTAGTAAATGGCCTG  
 CTTTTCTAAAGTCTAGCAACCTTGCTAGCAGGCATGCCAGCTAAGATAGCTAGACAAGCTTCTCTGACTTGATTAATAGC  
 CTGAAATGGCTTGGTAGCTACCCATGCATACCCACAAGACATGCCACCAGAGATCTCTTACAGTCCCCAAAATCAAGAA  
 CAGACTATGGGAGGCGCACAGTACGACAAAGAGCCATGACTACATGGAACCTTATCCATATCAAGTAACTCATGCAAGC  
 AGTAAAATGTAATTAATAAAACTGATAGAAATACACCTTAGGAACAGTGGGACTGTGAAGAAACACAAACACTGGCAC  
 AGGCACACATACACATGATAAGATATGCACCTACACACGGATGTTGAATTGTAATATGATAGTGGAGTAGTGCSCCT  
 GAGGGAAACACTAAATGTATTGCGTAACTGTTATGAATTATGCAATATTTAAATGTAATATAAATGCCTTAATGTTG  
 CTTAACGAACAGTTCTTGTGCTGACGTTGCTTCCAGAGGCAGTTTGGAACTCGGTAGTGGGTGTTGCAACCAGGACAGA  
 CAATTTTTACGCGCTACGCGCTTCACTACTCAGACGTCCTCGTGTGAGCTTGTGTGGCCTACCGCTTGTGGCTGAGC  
 TGTGTTGCTCCTAGATTTTTCCAATTCACAACCGGGGCGACTCTAGCAGGGCAGAAAATTTGACAAAACACTGACTTGTGGA  
 AAGTGGCATCCTATGACGGTGGCAGCTTGA AAAACACTGATCTCTCAGTATGGGCCATCTATTGCCACTGTTTGTCT  
 ATGGAGATTGCAATGCGGTGTGCTCGATTTTATACACTGTACGAAACGGGTGTGGCCGAAAATAGCCGAAATCCACTCAT  
 TGAAGTGGAGTTAACATTTCTTTGGCCATGTAGTGTATCTAGCTGGCTAGCGAAAGCCAACTTCATAAAAATGCTAAGTG  
 GCTAGTATTACAGAGAAAATAAACATTTTTGCTTTATTTATTCATCAAGAAGGAATTAATTTTTCAAACATTCCTCCTAC  
 GCGTCCATCCCAGATAAAGTCAAAGGAAACGCTACGTTGTTACTCTACACTCTCTCTCTCTCCTCCTCCACTGACGATACT  
 GACTACACACACTAGAGCAGGGTTCCTAACAGGACGAATTTGGACCGTGAGTGATTTTATTTGTCCCCCCCCCCCCAA  
 GTTTTTCAAACAAAAATAAAACCTTTCTTTGCTTTTTTTGGGGGGGGGGGGGCATAATAGACTGTA AAAACACTGGCAA  
 ATCAGTCCAAGTAAATTAATAATTTGAAATCTGTTCAAAGGATTTACCATGCATAATGGAGAGATATAATGTGATGGCAT  
 GCAAAATGTAAGCAAGTTTTAAATTAATGTTTTAGTCAAATATAAATCTATTTGGGCTTCTTACGCTCAATTTGCAG  
 TCTAGATTATATTTTAAATGTTGTTCTGGCTCCCTGACCATCCGCTCAAGAAAAAATCGTCCCGCGCTGAATCTAGTTG  
 ATGATCGCTGAACTAGAGTATCCAGCTTCTGCTTAGCATACCTTTACTCTGTGGTGCACCTTGAAGGAAACCTTTTTTT  
 ACATGAAAAAAGAGGACAAATCTGAAGGGGCACATACCTTGTGGCCCTATGGGCATGACACACTGTAATGCCTTC  
 CAGCTGTGTTGGGTCAATTTCTTTTGGAAACGTTTTCCTACTGTGACGATTGAAAAAATGTGGCAGATAGCCA  
 AAAGAAAATGTA AAAAATAAATCCAGCAGATAAAAATTTAGGTTATATCACGTTGTGTGTGTGTGTGTGTGTGTGTGTG  
 TGCTTTCCATAGGGAATTTGTTTCTTAAAATAAAGCAAAATTTTAGGAGCCATAGATGACTTGACTTGACTTTTCT  
 ATATTGTACACCAACACACAGTCCAAATAGACTATATTTCCGAGACGACCCTTTTCCCCCTCTCTCAGCCAGTGAGAC  
 AAGTGTAGGCTATGTTGCTAAATGCGCTGGGCACACGCTCTACAGGAACCTGCGTGTGCGGAGCACAGAGACATTGAGGGA  
 GTGTGCGGCACACGAATGTGCTCAGTCTGCTATCAGCACTAGAAGCTTGACAGGCGACCAGAGGGGGACACAGATACTG  
 ATAGAGTGGGTGCGAGACTCTCTTCCGACGTCGGTGTGGAACGGATAGGCGCGACATTCGTCCACTAACCGGTAACCGT  
 ATATTACAGCGCGGACAGACACTACAGCTATCCAATGCTGGCGGAATTTAGCTGACGGTAGTTGGACACGCAACATCCAGT  
 AAGTTCGTTACATAGTATGACCTGAATGACATTTTGAATTTTATCATCTCTTTAATGCAATTGAATATATATAGCCCT  
 TCTACAAATAGGAAATAAACCTTATGTTGTTTACTTAAAGAAACAAATGCTTTACACGCAAAATGTTTATCATATATCC  
 GCTTAACCCCTATAGTGTCTTGCTTCCATGATTGAAGGTGAACATAATTTGGTTGAGAAGTCAATACAGCACCACCCAT  
 CGGTTGGTTGAATGAAAAGGGAACATATGCAATTTGGGTGTGACCATCTGTAGCCTAGTTACAGTGTGGACTCACTCATG  
 CAGACCAACATGTAATGTTTGCCTTCTCAA AAAAGGACGAATGTCAATGAATGGAAGTTATTACAGACCGCTGAATAACCG  
 TTGGTTGGTTATGATGACAAACTAACAGTCAAGTATATAGACACATTTTACAGATAGTTTTCTTTTACCAATATATATA  
 TTTTTTAATACCGTAGGCTTAATATATAGTAGGCCCTCAAGACTGAAATACACTTAAAAGTTAGTACCATGTTCCCAA  
 AGATFATGTGATTGAGTTGATTAGTGTCCCATCTAAGCTATTGTCAACAGTGCATGTAGGGTAGAAAAGTGCATTTTCA  
 TTTTACAGACAAAAAGCTATGTATAACAGGTAGCCTAAAATCAAATCAAATCAAATCAAATGTTATTTGTCACATGCGCGG  
 AATACAACAGATGTAGACCTTACAGTGAATGCTTACTTACAAGCCCTTAACCAACAATGCAGTTTTGAGAAAAATACCT  
 AAAAGAATAAGAAATAAAGTAACAAAATAATTAAGAGCAGCAGTAAAATAAAAATAACAATAGCAAACCTTAAATATACA  
 GATAAAGATGAAACATAAAATGTTTGTCCACCTATTTAAACACCTTTAGCATCATTACTGAAGTAATGACATGAACCAT  
 ACAAGAACAGGAAGTCTTCTGACATATCCATATGCTGTACATTCATATACAGTAGCCTCCACCACACTTGCTTGGCAAAA  
 AGAATCTGAAACAGTTTCTAATTAATGAATCAGCAATGCATCATACATGAATATCTGCTGTCTCTAAATATATATAGT  
 GGTACATGTCAACATCTCTCTCTGCTCAGAGTAAACAGTGTATTTATTAGATTTCCATCATAGGCAATGCACATGTC  
 AGGGAGGGAGAAGGAAAATGCAGGAAGAGCTGGCATTCAAATTCATGCTGGAGCAGGACACAGTGAATGTAATCAT  
 CATGTAACAAATGAACTGATACCACACAGCTTTGGTACACAATTAATTTTATTGCACACTATATATAAACCATTGTGT  
 TTATTCTTTATGCCCTTCCGAGTTGGTAAAGTCCATGAACATAAAAATGATGTTGGTCCCTGTGCCATTGACTCTCATT  
 TTCTGAGTAGAAAATTGAAATTAATAACCAATTAACCCATAAGTGCCTATTGCTTATTTTGTGTCTCTAGCCGTGGC  
 CATGATCCCTCGTAGTATGCGAACAGGTGGGATGGCACTGCCAGGGGTGGAGTCAAGGGATGATCCCTCATTTGGCTACC  
 GGCCTTAGCGCTGACGATGTTCCCTCAGCAGCCAACTCAGGCAAGTGCATGAGAGTGTGCTGAGCTGACTTCCCTGAG  
 GTTGGAAAGTATTTTATATTAATGAACTTGATTAGGAACATGTACTGTGAGTAACTCATTACAGCAATTAAGTCAAGT  
 AGTAGTTTCAATGTTGATGATGGATACATCAAGGTGCAGTTGCACTTTAATATCTGTAAAGTTATGGAGGGCACTGTTCC  
 TGATCTCTCATATAGCAAATTTTCTCCAGTGGTCTCATATTAATCAATTCACCTATGCGGAATCCAAATAAATGGCTGAT  
 TTGATACAGAACTGGGTCTGGGGCCCCCTGGGTGCACGTTTTGGTTTTGACCTAACACTACATAGCTGATTCAAAT  
 AACTAACTCACCTCAAGCTTAAATTAATGAATCAGCTGTGCAGTGTAGGGAAAAAACAACACTATTAGAATCATTCT  
 ACCATCTAAACCGCTGTGAAAAATCTTTCAATAACCAAAAATATTTGATTTTTCAGCTGTTTGAATCTGACTACAAAACC

GAAAGTAAAAGTCTTAAAAATGAAACTTAAAGACCGGGAAGCATAGAAATAGCACACATAGAACATCTCTACGGCATTTTA  
GACTTGCTTTCAATGAGAATAACAGATCTATAAATACATTTCTCTGTGAATTTGGTCGGTCACCCAAAAAGTTACATAT  
TGCAGCTTTAAGTCAGGTGTCTCTTAGTCTTGATCATACATCTCAGACCAACCAGGGTAGGGGGTTAGGGTATTAGAG  
CAGTGGTCTGTGAAACCGTGGTAACAGGGCTCCCCACAGTTCCCTTGAGTAAACAGCAGATGCGGTCGGTGGTGGTTTCA  
AAGAACCTCAGGGATTTCAGTCATTTTGATTTCAAAGACAGATACTAAAGAGGAGGTACTTTCCATCAAGACATGCCAGT  
GAATGAGATGATGTTTGACCACCAAGCATTGAATAAATGCTCATGTCTTGAGATTTCCAAGTAGACTACTGTAACATTTT  
TGCTAAGATGTTGCTTTCATGAGCATTACTTTTTATGACCATATTACATGTATTTTCTAATAATAATTCACTATTTATTTAT  
ATCCAGCTGAATTCCTCCTGAAACAGAAAGGGTGTGTGGTGTGGTGGTGGTGGTGGTGGTGGTGGTGGTGGTGGTGGT  
CGGTGTTTTTCTCAGATGTATAACCTTTGTTTATGTTCCATTGGCCGAGACAGAGGCTGTAAAGGTTTTATCAGACTAG  
TTGTGGCAGTCCATTGCTGGGTTATTCTATACTCACACAGCCTTGTGTCTGTCACTAATGTCTGGGTTTTACTCCTTT  
TCAACCTAAAAGTACGCAGATAAATTTTCCATTGTAAGTTCTTGCCCTCTTTTATTGGAAAGAATGTGTTGTGAGATAT  
TATACTACTTTCATTTATCAATCAGTCAAATGTATTTATAAATCCCTTCTTACATCAGCTGATGTCACAAAGTGTGTACA  
GAGACCAGCCTTAAACCCCAACAGCAAGCATTGCCGGTGTAAAAGCATGGTGGCTAGGAAAACCTCCCTAGAAAGGCC  
AGAACCTAGGAAGAAACCTAGAGAGGAACCAGGCTATGAGAGGTGGCCAGTCGCTTCTGGCTGTGCTGGTGGGATTA  
TAACAGAACATGGCCAAGATGTTCAAATGTTTCATAGATGACTAGCAGGGTCAAATAATAATAATCACAGTGGTGTGCGAG  
GGTGAACAGGTGACACCTCAGGAGTAAATGTCAGTTGGCTTTTTCATAGACGATCATTTCAGAGTATCTTACCCTCCT  
GCTGTCTTAGAGATTGAAAACAGCAGGTCTGGACAGGTAGCACGACTGGTGAACAGGTGAGGTTCCATAGCCCGCAG  
GCAGAACAGTTGAAACTGGAGCAGCAGCAGCCAGGTGGTCTGGGGACAGCAAAGAGTCATCAGGCCAGGTAGTCTTGA  
GGCATGGTCCAAGGGCTCAGGTCTCCGAGAGAGAGCGAGAGAAAAGAGAGAAAAGAGAGAAAAGAGAGATATTTAG  
AGAGAGCATACTTCAATTCACACTTCAATTCACATGGACACCAGATAAGACATGAGAAAATACTTCAGATATAACAGACTG  
ATCCTAGCCCCCGACACAAACTATTGCAGCATAAATACTGGAGGCTGAGACAGGAGGGGTCGGGAGACTGTGGCCCC  
GTCCGACGATACCCCCGACAGGGCCAAAACAGGCAGGATATAACCCACCCACTTTGCCAAAAGTTTACGCCCCACACCAC  
TAGAGGGATAACTTCAACCACTACTTACCATCTGAGACAAGCCGAGTATAGCCAGAAAAGATCTCCGCCACGCGACA  
ACCAAAGGAGCGGCCAACCCGGAGAGGAAGATCAGTCACTCAACCCACTCAAATGACGTACCCTTCTAGGGA  
CGGCAGGGAAGAGCACCAGTAAACCAGTGACTCAGCCCTGTAATAGGGTTAGAGGCAGAGAATCCAGTGGAGAGAGGG  
GAACCGGCCAGGCAGAGACAGCAAGGGCAGTTCCGTGCTCCAGTGCCTTTCCGTCCACCTTCACACTCCTGGGCCAGACT  
ACACTCAATCATAGGACCTACTGAAGAGATGAGTCTCAATAAAGACTTAAAGGTTAAGACCGAGTCTGCGTCTCTCAA  
TTGGTAGGCAGACCATTCATAAAAATGGAGCTCCACAGGAGAAAGCCCTGCCTCCAGCTGTTTGTGTTAGAAAATCTAG  
GACAGTTAGGAGCTGCGTCTGTTGACCCGAGCTACGTGAGGTATGTACAGCAGGACCAGATAGGTAGGAGTAAGCC  
CATGTAATGCTTGTAGCTTCTGTAACACTTGAACACTGACCCCTGCTTAAACAGGAAGCCGCTGATAGAGGTTAGCA  
CTGGAGTAATATGATCATTATTTTGGGAGGTTCTAGTCAAGATTCTAGCAGCCGTGTTTAGCACTAAGTGAAGTGTATT  
TAGTGCTTTATCCGAAAAGTAGAGCATTGCAGCAGTCTAACCTAGAAGTGATAAAAACATGGATTAATTTTTTGGCATCAT  
TTTTGGACAGAAAAGTTCTGATTTTTGCAATGTTACGTAGATGGAAAAAGCTGTCTTGAACAGTCTTGATATGTTCCG  
TCAAAGAGAGATCATGGTCCAGAGTAAACCGGAGGTCCCTTCACAGTTTATTTAGAGATGACTGTACAACCATCAAGATT  
AATTGTCCAGATTCAAAGAAGATCTCTTTTTTCTTGGGACCTAGAACAAGTATCTCTGTTTTGTCCGAGTTTAAAAGT  
AGAACATTTGCCCGCATCCACTTCTTATGTCTGAAACACAGGCTTCCAGGGAGGGCAATTTTGGGCTTACCAGTGTTT  
CATTGAAATGTACAGCTGTGTGCTGTCATCCGATGACAGTGAAGTTAACATATATGTTTTCCAAATGACATCAAGAGGTA  
AAATATATTGTGAAAACAATAGTGGTCCGAAAACGGAGCCTTGGGAACACCGAAATTTACAGTTGATTGTGACAGGGAC  
AAACCATCCACAGAGACAACTGATATCTTCCGACAGATAAGATCTAAACAGGCCAGAACTTGTCCGTGTAGACAATT  
TGGGTTTCCATATCTCAAAGAAGTGTGGTTATCGATGGTATCAAAGCAGCAGCTAAGGTCTAGGAGCAGAGGACAGAT  
ACAGAGCCTCGGTCTGACACCATTAATAATGTAATTTACCACCTTCACAAGTGCAGTCTCAGTGTATGATGGGGTCTAAA  
ACCAGACGGAAGTGTCAAATACATTGTTTGTCTTCAGGAAGGCTGTGAGTTGCTGCGCAACAGCTTTTTCTAACATTT  
TTGAGAGGAATGGGAGATTCGATATAGGCCGATAGTTTTTATATTTCCGGGTCAGGTTTGGCTTTTTCAAGAGAGGC  
TTTTATTACTGCCACTTTTAGTGAGTTTGGTACACATCTGGTGGATAGAGAGCCGTTTTATATTAACATAGGAGGGCC  
AAGCACAGGAAGCAGCTCTTTCAGTAGTTTAGTTGGAATAGGGTCCAGTATGCAGCTTGAAGGTTTAGAGGCCATGATTA  
TTTTCATCAATGTGTCAAGAGATTTAGTACTAAAAAATTTGAGTGTCTCCCTTGATCCTAGGTCTGGCAGAGTTGTGCA  
GACTCAGGACAACGTAGCTTTGGAGGAATACACAGATTTAAAGAGGAGTCCGTAATTTCTTTCTAATGATCATGATCTT  
TTCTCAAAGAAGTTCATGAATTTATCACTGCTGAAGTGAAGCCATCCTCTCTTGGAGAATGCTGCTTTTTAGTTAGCT  
TTGGCAGCATGATAAAAATACATTTGGATTGTTCTTATTTCTCAATTAATTTGAAAAATAGGATGATCGAGCAGCA  
GTGAGGGCTCTTCGATACTGCACGGTACTGTCTTTCAAAGTCTCGGAAGACTTCCAGTTTGTAGTGTGGTGGCATTCCG  
TTCAAATTTTCTGGAAGCTTGGTTCAGAGCTCGGGTATTTTTCTGTATAGCAGGGAGCTAGTTTCTTATGACAAATGTTTT  
TGTTTTTAGGGGTGCGAATGCATCTAGGGTATTTGCAAGGTTAAATTTAGTTCCTCAGTATAGGTGGTTAACTGATTTTT  
GTACTCTGACGTCTTGGGTAGGCGGGGGAGTCTGGCAGTGCATCTAGGAGTCTTTGGGTTGTCCGAGAAATTTATAGCA  
CGGCTTTTGTATGATCCTTAGTTGGGGTCTGAGCAGATATTTGTTGCGATTGCAAACGTAATAAAAATGGTGGTCCGATAG  
TCCAGGATATGAGGAAAAACATTAAGATCCACAACATTTATTCACGGGACAAAACCTAGGTCCAGAGTATGACTGTGGC  
AGTGAGTAGTCCGGAGACATGTGGGACAAAACCCACTGAGTGCATGATGGCTCCGAAAGCTTTTTGGAGTGGGCTGTG  
GACTTTTTCCATGTGAATATTAAGTCAACAAAAATTTGAATATTATCTGCCATGACTACAAGTCCGATAGGAATTCAGG  
GAACTCAGTGAGGAACCGTGTATATGACGCAGGAGGCTGTAAACAGTAGCTATAAAAAAATGATTGAGTAGGCGGTGAG  
GCCTCATTTAACACAGTACATTCATCAGGCTTCATCAGGCTTAAAGCCATGTTTCAGTCAGGCCAATCACATCAAGATTAT  
GATCAGTGATTAGTTCATTGACTATAACTGCCTTGGAAAGTGGGGATCTAACATTAAGTAGCCCTATTTTGGAGATGTGAG  
GTATCACAATCTCTTCAATAATGGCAGGAATGGAGGAGGTCTTTATTCAGTGAGATTGCTAAGGCGAACACCGCCATG  
TTTAGTTTTGCCCAACTTAGTTCGAGGCACATACACGGTCTCAATGGGGATAGCTGAGCTGACTACACTGACTGTGCTAG  
TGGCAGACTCCACTAAGCTGGCAGGCTGGCTAACAGCTGTCTGCTGCTGACCCCTATCTCATTGGGGAGCTAGGGGA  
GTTTAGAGCCCTGTTTTATGTTTCGTAGATTAAGATGAGAGCACCCCTCCAGCTAGGATGGAGTCCGCTCACTCCTCAACAGGCC  
TGTTTTGAGCTGAGTACCAGAAAGAGGGCCAATTATCTACAAATGTTATCTTTTTGGGAGGGGCAGAAAACAGTTTTCAAC  
CAGCGATTGAGTTGTGAGACTGCTGTAGAGCTCATCACTCCCCCTAACTGGGAGGGGGCCACAATTTTTATGCTACTTAGG  
CCAATGTAATTTTCACTTTTGTATGACAAATCATATATTCACCCATAAATTCAGACCCGATCAGTTCATTTAAGA  
TGAAAACATGATTGCCATTTATTTGATTTGCTCTTAATTCATGTCAATTAACCTCATAAATTTCCACTGACTAACTCTC  
ATACACTTGCTACTTGGCTTTAGTTCGTAGTGCACATGATGCTCGTCTCATTGGCTTTGACTTCACTTAGCATGCAGTCT

CAAGAACTCCCCGGGCTATAAAAAAGAGTCGCACTGACTCAGGCACCAGCTGCAGTGGTAACTTCCCTCTTGTCTGT  
TTGTGTACATGACATGACCCTGTACTATGTGTCTCGTGTAAATAATCTATGGGTGGCAACCAGCCGGTGTGTCTATG  
TGTGTGTGTGTGTACAGCTGCCACATCCCCCCTCCACTCAGATATCATAGGCCGGTTCAGAGGACATCTATCAAGT  
GGAAATTTGAATCAAGCACTTGTACTCTTTAATGAGGAACTTAGATGCATGTGAATGGATTAGACAATGGGGTCAG  
GCCTCAGCATGACAATCCATCCCCCTGCAGGCAATAAACTTTTTCCACACAGGGCAACATGTTCTTTAGGTGAGGTTT  
CATAGATATGAGCTACCAGCATCAACATTTGTTTTGAAGCTATAGCTTGGTGAATAAATTCAGTAGTATTTCCGCTTAT  
CTAAAAATGGGGCCTATGTTTTGTCTATATAGTGTGTGGTGACCCATACAGTCTACTGAATATTCATTTCTGAACAAAAA  
AACGAAGTGTCTTGCCAATATGACCCGTGATAGTTAAACAACCTTATGAACCAAGATTTAAAGAGATTTAGATACGA  
CTTTGATATAAGGAAATAGAGCAGCTCTAGAATACCACAGGGCTCACTTTAAAGAGTAGAGAGGGTACCATGGGATGCA  
CAGATGAAAGCGTGAGAAGAAGAGCGGGGAAAGATGGAAGGAAGGGGTGGGAGCCTGAGAGGGAGAGCAGGGAGCTAAA  
AAAAACAATAGGCATCTTAAAATAAACTTCTGAGGATATATTTACGAGCCCAATTTGACTGTGTATGAAGTAGTCA  
ACAATATTGGTTTTAGCGGTGGGATTACATTTTCACATGACAATACGCTCCCATTTGCTCACGTACACATTTGATCATA  
TGTATAACAACCATAGATACTTATTTAAAGAGACATAGCCAAAATGTCTGATGTTGACGAACAAGTGACGGAAGCAGAA  
CTTGAGAATGTGTAAAGACAGGGGGTGAAGATTGAGAGATTGTGAGGCTCTTCCCTGCTTTCCCTCCCTGCACCGATG  
CCTATTGTAGTGGTCAGAGGAGGCGGGTGTGAGGGAAAAGAGAAAACAAAAATAGCAGCTCGTCACAACAGCACATC  
GTGCATCCTGTGTTTTGCTCCGCTCATTTATGTACTTCTCTATGGAGAGAAAAGATGGAAATATAGAGACAAGGAGCATG  
TTGAATCATGAGAGAGTTCCACATAAAGAGTATAAACATTTAGTTAAACTAGTAGCAATGGAAAAAGTGGGCGAACGA  
AAAAAACATTTGGCAAAAATCTGTAAACATGAGCAGACAAAATGGGAGATTGAATGATGCGGTATCTGAGGAGAGTCAA  
GCAAAATTTCTTATCAAGATGTTTCTCATGGAATGAACCTCAGCCACTTACTTCCATGATTTATTCATCTGCGCCGTGT  
GCCAGCTTTTCTTACAGCGGAGCAGCAAGTCTTGTATTGATTGTTGGGTAAAAATGCACTCAAACAGGTTCAAAGAT  
TTTGTGCATTTAGTAGAACAGAACTGTAGGGGTGTTACATGCCACAATATTAGACATCCTCATTGGTGCCTCCCTG  
TTCCATTGCCACTCACAGATGAGATGTGGTATTGTGGTTGGTTGAGGTTGACACGGATGGTCCCGAGTAAGTGGTCTC  
ACTGTAGGTAACGTACAGGAAGAGTGTGGGTCAACTTAACCTTAGACCTACTGCTTGAGACAAAAACATAATCCAT  
AGAAAAGTAGGCTTACAGTAGACGGATGTTAAAAATGTAAACAAGTTGTATTTTGCCCTCACTTTTACAACATGCAGTCTC  
TATAAACAGCGACTGTGCTCTTAGCCTAGTTTATAACACCCTGATTAGTTGAATGCACAGTGTACTGTAGGCCTACAGT  
ACAAAGCCTGTAGTCACTGTTTTTCGTGACCTGACGTAGGCTAGCATTTCCTGTAGTCCACGATCAGCTCCTTTGTCTT  
GCTCACATTGAGGGAGATGTGATTGTCTTGGCACCACACTGCCAGGTCTCTGACCTCCFCCCTGCAGGAGGTTAACATGC  
TAACAGCCAGACCTAGCTTCTACTAGTGGTAAAAGGCTGTAGCCTGAACAGTCTATCATTTGTGAGGCTGAAAAGTCTTCA  
CCTGTGTGTCAACATGTGCTCACCCGCTAGTGTGCTTAGCCCTATATGTAATAAGGGCGTGTCTCTGTCTTTATTAGTTG  
AATGGAACATTTATGAAGTCATTAGCATATGTCACATTAATAGATCAGTGTGAGAGATGTAATGATCTCAGAGCA  
GGTTTGTGAAATGTGATAATGTAGGATGAGTTTTAGTTAATTAGGTTCCCTCTAAATTTACTCTATTATTGTTGGGAA  
GAGATATAGTCAAACAGGTTTAGTTACAAATGTAGGTCATTACACAGGGAAAGAGAGTGGGAGACGGGAAAGGAGGGAT  
TGAAAGAGAAAAGGTTATTGTTACGCCAATAGCTGCAGGCCCTTCTCATTTGTGTGTAGGCTATGTGAGTCCCTGTGTGTT  
AACAGGTGAGTATAATATTATATCATCCCTCTGTCTGTCTGTCTGTCTGTCTGTCTGTCTGTCTGTCTGTCTGTCTGTCT  
GTCTGTCTGTCTGTCTGTCTGTCTGTCTGTCTGTCTGTCTGTCTGTCTGTCTGTCTGTCTGTCTGTCTGTCTGTCTGTCT  
GTCTGTCTGTCTGTCTGTCTGTCTGTCTGTCTGTCTGTCTGTCTGTCTGTCTGTCTGTCTGTCTGTCTGTCTGTCTGTCT  
TGTCTCCATGTGACAGCCACAGAGGGGGTGGCCCTACCTAATGACGGCTTCAGGTTGTGTTTTATGTCTGTAAAGTCC  
GAGAGCCAGACAACTGAAAGACAAAGACAAACAATCCCTCGGTCATTGAAAAACGACGGTCAAGGAGAAAATAGGAAAC  
TAAAAAGACCGATGAAAGAAAGTGGACAAGATGGTGTTTGTGGCTTTCTGTGAAGTCTCAAAGAAGCTAAAGGCTTGT  
AGCCTGTCTGGACTTGTGCGAGGCAAAGGTAACCTTGTGTTTTCTGGGTCAATGTCAATCAGGTACAGATAGGGGGGAAAG  
AGAAAGAGCAACAGACATATGAGATCAACAACAGAAACATGCTGCAGTAGGTAGACCAACATGTTCTGAACCTATGTCAC  
GATAATAGACGGACTATGGATTTTTTTTATTATCCTTTGTTAAACTAGGCAAGTCAGTTAAGAACAAAACTTATTTACA  
ATGAAGGCCCTACCTGGCCAAACCTTACCCGGACGACGCTGGGCCAATCTCCTCCCGCCCTACGGGACTCCCAATCACG  
TCCGTTGTGATACAGCCTGGAATCGAACCGGGCTGTAGTAGCAGCCTCTAGCACTGAGATGACATGACATGACACCCCT  
GTGCCACTCGGGAGCCGAAATAAGATCCTTTTCGTACATTAAGTACGATGGACCTTCGGTACTCCAATTGATTTGAAT  
GAGAAAGTGGTTACTGAAGGTGAATACAGAAGGCACCTCCGCATGTCAAAAAGGAACTGATAGACACGTTATAGGATA  
CAGCAGTTGTTTTATAACTGTGATGTCTGGTCAGTGTCTATATGACCTGCTTTGTGCTTAATGCATTTGCACGTATATG  
TTGACCTGGATATGCTTATCATCATATTTGTGGTTGGATCTCAACTGAAGGGGGAAAGTTAATGCAAAAGGAGGCAGTGCA  
ATGCCTTAAATAGCTTTTAAACGTTGTGACGTTGTTGGTTTACATGTTGAATGATTCACATATGACCACTCGGACTTC  
GTTTTGGGTCACTGTTGATTTGATGTGATGTCAGACTAAGGTCAGGTTGTTTTCTCATGCAATTTTTCAGCATG  
AAAATCACATTTTCTAGGGTGTAAATGGCAGGGGAAGTGTAAACTGATATATAGGTTAGCTGCATTTACAATTGACTGT  
GGATTGTTTTGTGTTAAGACGTACTCCACTTACAACCTTATCAGATTCTGGTATATTACCCATGTTTGTGTTTTTCT  
TCTTTCAACCCACTCAGATATTTTCTGTTAAAACCTGCTTTGCCCTTTGAAACTCCTAAATATTTTGTGTTTATTATTGT  
ATAATCTAATAACATAATATGCTTATGGGCACGTCGGGGCTTTATGTTAAAACCAAGGTTCTGGTCATGTGACAGCA  
CTTATTTTTATTGGATGTTATTGTATTCCACAGGGGGAGACTTCCCCATGAAGACAACTTGGTACTGTCTCTGGATTT  
GGTAGGTCATGCAACTTGAGATAAGCATGAATAACTAGATTTGGTGACAGTGGGTGATTTCTGCGAGAGTATGAATGA  
TGCATTTTTTTTTCTGAATCATACTTAATCATACTTTCTCTCTTCCCTCAGTCTACTGTGTTGGAGGAGGAAGAGGA  
CGGAGTGATATACAATGTGGTGGTGAAGCAACAGCATGGCGCCCCCACCAGTGCAACAGTGAGAATACATAACCATTATAC  
AATGCACAGAAATTACAGTATAATTACACCTTACATCTTACACGTTATCTTTGTAAGTCTGTATTGTCTATGGTAATATT  
GTTATGAATCTCTCTCTCTCTCCCTCCCTCCAGTCCAGCTCTCGTTCCGAGTGTGTGAAGGCGGGAACAGAGGAGAAGTT  
GGTGCAGCACCTCTCCACTCCTTCGCCATGGGAGACTCCTCCTTCAATCACCATCTTCCCTCTCCACTATCGCTCCTTTA  
CCTCTACCAAGAGAGTGTGGACATCCTCATCGACAGGTGGGGTAGACAGGGGAACAATGCATTTGCACACCAGTTGTAT  
GTAGTTGTACAAAACGTTTTTTGAAGTGTGTAGAAAGCAAGGGAAGGAAAGGAGACATTTGTGATGCTCTGCTGCTGCC  
CTGAAGAAACCATCTTATGACGCTTTTTTTTCTCTCAAAGGAACCTTCGTCTCTATTTTTTTCTCTTTCTTCCCTCTT  
TCTCCAGATTGCAACATCCTCCAGGAGAAAGTACAAGGAGTCAGACTAGGCAACCCTTCAACAGGTGAGTCTGATACTAT  
ATGATCCCTCTCACGTGTGTGTGTGTGTGTGTGTGTGTGTGTGTGTGTGTGTGTGTGTGTGTGTGTGTGTGTGTGTGT  
GTGTGTGTGTGTGTGTGTGTGTGTGTGTGTGTGTGTGTGTGTGTGTGTGTGTGTGTGTGTGTGTGTGTGTGTGTGTGT  
NNNNNNNNNNNNNNNNNNNNNNNNNNNNNNNNNNNNNNNNNNNNNNNNNNNNNNNNNNNNNNNNNNNNNNNNNNNNNN  
NNNNNNNNNNNNNNNNNNNNNNNNNNNNNNNNNNNNNNNNNNNNNNNNNNNNNNNNNNNNNNNNNNNNNNNNNNNNNN  
NNNNNNNNNNNNNNNNNNNNNNNNNNNNNNNNNNNNNNNNNNNNNNNNNNNNNNNNNNNNNNNNNNNNNNNNNNNNNN



GAGAGTGTGCAACCGAGGACAGACAATTTTTTGTGACACTTGACAGTCCGGTCTGTGAGCTTGTGTGGCTACAAC TTC  
 GTGGCTGAGCCGTTGTTGCTCCTAGATGTTTTCCACTTTACAATAACAGCACTTACAGTTGACCGGGGACGCTCTAGCGAG  
 ACAGAAAATTTGGTGAAC TGACTGTGGGAAAGGTGACATCCTATGACAGTGCCACATTGAAAGTCACTAAGCTCTTCAGT  
 ATGGGCCATTTACTGCCAATGTTTTCCGAAAGAGATGTCATGGCAGTGTGCTCGATTTTATACACCTGCATCAACGGG  
 TGTGGCTGAAATAGCCGAATCCACTCATTTGAAGGGGTGTCCACATACTATATACTGTATATATAGTGACTATCTTGACT  
 ATTTGACTGTCAAATTTGTAGTAATGTGGCCATAAGTAATCAGTTGTGGAAAATTGACTTGGGGGGTCTGGGGGTAAGT  
 CCTGCGCACTTTTTTCCATTA AAAATATCCTCACACAGT GCAAGAGCTGGTAAATGAACATGCAACATTGGAAAGAGCT  
 GAAAGCTAAGCTTGTACATTTACTATGATTTCTCAGGGGTGAGTAAGATGTTTTGTAGGTTGTTGTGCATGCAGATTAC  
 GGTGCATGATGAACATA CATGATATGATTCTCTCACCTCCTTACAGCCTGAATTCCTCCAGGACCAGCCTTCTGTGCTGAC  
 AGTGACGGTCTTTTTGACTTCCCTCCCGCTGTGCACTTTCTTTCCAAATTCACCAAGGTAATTACAAAATAAGACCT  
 AATATCTCCAGTTATTTTACGTACTTTCCCAAAAGTATATTTGCATTGCCAGCTAGAATTCAGAGCATGCAATTA CTAT  
 TCATGCGCAAATACTCGTAGTTATTGCTAAGTATTGCTGTTTACTAGTAATCAAATATGATTGTTTTAAAACAAATGTCCG  
 TAAAAACATA CAGAAGAGCACTTTTAAAAGAGGAAAATCTTTGATCTTTAATTCCTCTCTGTGTCTTTTTATTTGCTTT  
 GGCCTCATGGAACAGCCACTTTTTATCTTGTGCATATCAGTAAGTATAATGTTTTTATTATTATTTTATCATCACTATTAT  
 TATTTTCAGCATATGAAATCCCTCAGTTTCTGTCTGGATGTTGACTCCTCCCTCCCAACATGACCCCATCCCGTCT  
 GCATTGACACCATCCACTCCCATCAAATCACATCGTCGATCAGTCTCCTGTGGCAACAATCCCAACATAACAACAAGG  
 GTCTGGCCCTGATATGCGGATCGTCAGGATCGGATGGATTTACAAGATGGGAATATGTACAGAAGCATACTGTACTGA  
 GCTGGGATTATGATATATTGAGTTGAGATTTGATTAGAGATATTTGCCTTTTTTTGGTATCAAATTTACACTGCCTAC  
 ACCCTGCACTCATGACTATTTACTTTAATCCACAATAATCCGTTAATGTAAGTAATCCAAAACATTTCTCAGGTTGTAC  
 ACAGGATCTTATACTAGGAGTCAAGCTGTCTGGTATCATTGTCTGTTCTCTCTCTGTTTCTCAGGTGACAAGCAATG  
 ACAAGACGCCCACTGTGATCAGTTCTGCCCTAGAAAACACAGTCAAGACCCCAACAGCATCCAGATATGAGCTGATC  
 CAACTATTGCCAGAGGAAAGGGTAAAGACATTTCTCAACCCGATATGCGAAATCACTTTAACAGTTCTCTGTTTCAAT  
 TGATTGTAGTGACTTTTTCTGTTCTGCCCCTGAGATGGTCTGCTATCCCTGCCACAGAAACGCTCTCATGCCATGAC  
 TTCTCTAGTGTGACTTCTGCTGCGCAGACAAGGCAACACCCCTTTTCGCTCTCAACCAATCAGCACAGAAACTA  
 GTGCCACCTTCCCTCGAATCAAAGCCAAGGGGCGGAGACAGCTCTTTCCCAAATAGGCTATATCTGAGACATAATGTAGC  
 TAGTGCTTCTCAAGGACAGGTCACGATAAGAATGCAGGACGATATCTCAGTGAGATGTGGCCTTGTCTTCTCAATCTTT  
 TTCCGAAGTGGGAACACATTTCTGAGCGAGCTTGTCTAGCAAAATGTATCCTGAAACCTGTCTGAACTGTTTGTATGAAC  
 GTATCTTACCTGGGACATTTCAATAAATAGGCTGCCCGTTTTGTGTACACCAGGGAAGTCCATTAGTGTAGAAGGGTGCA  
 TGCTCTCTCGTTGGCAATGCATAACCCTGCAAAATACACACTAGAACAAGACCATTGCAAAATCTTTAACAGATGGTGAA  
 TGGTCTGTCTTCTTAAGTCTCATTTGGCATCTAATTTCTATTTAACCAAATGGAATAGCTTTGGAACAGAGCACTGA  
 GGAATCCAGATCATCTTGAGTATTTGAGGAATGTGCCTCAGGTGCCATCCTAGAAATGAGTTGATAGTAGAGA ACTTCAT  
 TAAATCAAAGTAGTTTGGGCGATATGACCTCCTTGAAATGACCATGACCACAACAAGTTTTACATTTCCGCATAGAGAG  
 TGGATAACAAGCAGCATGACGACATATTAATTATGCAAGGCGTTTTCGAGAATGTGAATGATGGGGAGAGCACTGGGCTGAC  
 ATTAATGACATAATGCATCTGAATAAGTGACAGACAGAGTCACTGAAGCCTCTCATTATAGCAAAGCACGGGGCTCATCA  
 AAATGTTTTAACTATGTA CTTTGTATGTATATGTTTTTTTATGTATGGACGATGTGCATGATTGTGTTTACATTTCCAAG  
 AGCTATCAACAAGTGTGAGAATGACATGTTATTCATTTGGAAGTAACATGAAATGTATGAAATGGCTCAAATGCAACC  
 ATTTTCAAGTGGGTCAGAGCTGTCAAAGATTTACATGATTTCCGCTTGAGCTTTGTGCATACATATGCAATGATCACTT  
 CTGGTAGTATCTTATGTA AAAATACAATAACTTTTACATTTACAGCCTTGGCCACTCCCATATAGAATATAGTCATATTTTGA  
 GTACTAACCATTAGGCGTAACAGCATCAACCCACAACCTTAACCTAAACAATTCATGTGAAGACACTAATGAAAGTCCA  
 GACTATGTTGTGCGTATTGAAAAGATGCTACCATTGCACCTTAATGCTATACTTTTTCAATACAGCATAAGCTAATCTTT  
 ATCAATGGTCTCTGAATGGGTTTTAGTTGGTAGTTGGAAATGGAAGTCTGTCTGAGGAGTATTTCAACCAGGGCTCCCAAAG  
 TCAGTCTCAACGACCCATGCGAGGTTAGTGAGGGATTCTGACCAATCACTGAATGATGTTAATTGATATTTTCTCTGA  
 CGTTTGTAGAGATCTGACAGCTATAAGGTTTCAATATGCAATGTCTTTAGTCCAGGAAGTGAATGTAGAGGGTTTTGCA  
 AAAGCTCTGCTTCTATCCCATGAGGATGAGACCCGTAGGAAGAAAACTGTATGCATATGGACGATTTGGGGACAGAT  
 TGTCCGAGGGCCCTAAGTGAACCTGCGCCAGTGTGTTGAAGTCTCTACTAAGGCTGAAGCATAGATTCAAGTATGTTCC  
 AGGGAGAGGAGAGAGGATTCTGGGTAAAGTAAATTTGATGAAGTGTAGCGCCAGGCTAAGCTACTGATTGTTTGTGCTT  
 TTCTCTCATTGGTGTCTGAACCCTTAAAAGTGTCCAAATGTCACCTATTTCCCTATATAGTGTATTACTTTTTACCAG  
 AGCCCTATGGGACCTGGTCAAAGTAGTGGGCTTAATAGGGTGCTATTTGACATGAAGCCTCTGTGATATATGCATTGGA  
 ATGTACAGTACATATGATGCATTTACAGTGTGTATAAGCTGGCATGTTTATGCACTACATATGCCCTGTGTTTTG  
 TGTGATACATTTCTTTTTCTATGCATTTAGATGTGACAGTAATATGAGGAATTTCTATGCAACTCCCGGATGTGTGCT  
 GTAATTTCTGCTGTGCTATTCTTATCAAATAAATGTACAAAGATGTACATATAAAAAGATTCAGACTGTGGTTTAGTATCT  
 AGCTTGTGTGCTGGATGAGGAAGTTAATGAAGAACCCTTTGTGCACCCCGCAACAGTACTTTCTTTATTTGGGACAGAAGA  
 CAGTCACTATCTTTGCCTGTTTCAAGCTAAAAGCTGAAAACGTCATAAACGTTTGACTAAAAAGTAAAAGAGAAAATAAA  
 GAAAAACATTTATACATACTTTAACGATCATTTAAAAAATTA CAAAATGTTTACATAAAAAGGTTGAAAACAGACGCAT  
 ATAAAATGTACCTGAGATCACAATCAACATTTCTACAGTCATTAGCAACTTATTAGCATTTCTACAGTCATTAGCAAC  
 ACAGAATGTAGCAAAGTGTCTCATTGTTTAAATTTATATAGGAGTGCCACTTCCCTTTCAAGTATGTTTCTATTTACATGGCAA  
 TTTATGAAACACTCCAAAGCTGCCATAAAAAGTGAATTAGATGCTGATACCTTATTAATCAACATTTCTATGGGGTACCT  
 TGTTCATGGAGCTTAATAACTAATAACACCTAGCTGCTCAGTGAACGTGTGTGCATACTAGTAACCTTTACTGCTGGTCCCA  
 CACTGATGCTTACTGATTCAATCTCCCTGGTAGTGCCTTGCATCCTCTACGTCCACATCACACCCGCTAGTCCCTCCCC  
 CGCACATCTCACACTCCAGCGCCGTGTCGATAGGCTTCCACACCCGTGGCGTCCCGCAGACACACAGTCCCGCCCCC  
 CTCTTCTCCTCAGCCTCGTTCCGGTTGATGTGCGCCACACACACCCAGCCAGCAGCTCCATCCACCCCAACCCCGGTGGT  
 ACTCACGGCCACTTTGAGTGGTCTGTTGGAGGCTTGAAGGTGATCCTCCCGCTGGGGAGATAAGCTGGATGCTCCAGGA  
 CTTCCAGCCCTGAGGACAGTCAAGGGCAGGATGCCAACGGAGGATCCAGAACTGGACTAGGAGTGTACTGAGGAGG  
 GAGGGAGCCACCCAGGAGTGGTACAGATCTAATGGGAGACAGGAGGGGAAAATGGGGATATTTGGTTAAATGTTGGGTCA  
 TTCACAACATAAAAATGGCAATGACATGAATAGTCACTTCAACCATGAAAACAACACTTCAACAGTTTAAAAAATGACAAA  
 CGAATAGTTTCTAAATGTTCTTACCATTATTGAATGATCTCCCTTGGCAAAGCTGATGAACTCGGTTCCACCCAATG  
 AGGTGAGAGACACTGCGATTGGATGCAGGTTGGGGTGC GGTAAGTTGCTATAGGCCATCTGCCCTTGGCTGTTGTTA  
 CAGACGTCAGCCAGTGCGGGCACCAGAGAGGCCAAGGAAGCAGGGACACCACAGTCATACACATTGGGCTGGTTGATCTG  
 CAACTGCTCTCTACAATGTA AAAACATAATACATGTCAACTGAACACTTCAAATATTTCAATCAACGAATGTGTAAAAA



TCAAACAGAGGTGCTTAAAGGAAGGCGCACTGGTAGGCCTCATGAAAAACAATGTTTCATATGCTCTTTTAAATCACAGT  
 AATAGGCAGTGATTTGTCAGTCAGAGTGAGCTTGATAACGTGAAAGAATCCTTTTCATAGCATCACTTTTCATATCCTGTA  
 CATTAAGACAACCTCTTACGTTGAGTATTAGAACGCAGTTTACACAACCTGATAATGACTTGATATTTGAGTGCATT  
 ACACAAGCCACCTGCAGACAACCTTCAAAAATGCAATATTCATTTGAGGGTTGTTTTTCTGATGAAAATAGTTATTCG  
 ATACATGGCCTACTATTTCTAACTGGAAAAATTAATTCAAAAGTCTTGTGTTGAGTAAAAATCCTTTTTCCAAAATGATTTA  
 GGTACATTTTTGTGAAGATGTATGAGGGTTGTGATATGGGTCAATTAATAGTAAAAATCATTTAAGGGATCAATACATTTT  
 TATATGCTTCCCCAGTATCTTCATGAACCATCAGGCCAAGTGTTTTTGGTTGACCCTGCTGGACAGAAAGAGAAGGAGG  
 AATCGGAACACGCTGCATTCAAATTCAGGTCTTAGTTATTCCAATGTACTGGATCTAATTCACATTAGCATTTTACATAC  
 ATTCATAAGTGAATAAATTTGTTATGACATATTGTAAAAACTCTCTGGCTGCTGGCTCTGTCACTTTTCAGACATGCGC  
 AGAGCAGACTGAAAGGGGAAGGATAGCTCTTGACTGAACCACAGGGGTCTCTGTAAAGAGAGAGTAATCCAAAAGGCA  
 CAGACACACCCTTGACTTTCAATTGGCACCCGCTGATGTATCTCTCCTGATTGGCTCTGTGGTGCACAGTCTG  
 GCAGTCTGACTAAAGTGCCAGAGGTATGAGGAGAGACATCCTCCTTTGTATTTATGGGAACAAAATATTTCCTAACACTTT  
 GGATCCTATTTTTGGACAGTTAGAAAACACAATGCATCAATGCAAAACATTTTTTATTACTAATTACTGTCCATGAGTAA  
 CCTCAACCTTGTGGTCTGTGGGTGTTGGGGCAATAAAGTGCCAACCAATTCACCAATGACTAGTCTCTCATGCCCC  
 TATGAACGGGGACACAGGGAAATAGTTTTTAATCTAAACCAGCCCTTTTTTACTGGAGTACACTAACCTAATTGGGGCT  
 CTTTTCTTGACACACAGTAGCAGTTTACCAGATAAGAAGTAAAGAAGATCTATCTTCAGAGTTTGTACTGTTTGGTGACC  
 TGAAGTGGGATGTGCTTAAACACCCCGCCCTCAACTTAAGCTAGATGCCCTCAATCTCACCAACTGATCAATGGAA  
 CCTACAGGTACAACCCCAAATCTGTAACTCGGGCACCCCTCATAGATATCTTCTGACCAACCTGTCTCTAAATACAC  
 CTCTGCTGTCTTCAACCAGGATCTCAGCGATCACTGCCTCATTGCCTGCATCCGTAATGGGTCTGCGGTCAAACGACCAC  
 CCCTCATCACAGTCAAACACTCCCTAAAACACTTCAGCGAGCAGGCCCTTCTAATCGTCTGGAAAGATATTGACCTCAT  
 TCCGTCAGTAGAGGATGCCTGGTTATTTTTTAAAGTGCTTTCCTCACCATCTTAAATAAGCTTGTCCCAATCAAATAAT  
 GTTGAACCAGGAACAGATATAGCCCTGGTTCACCTCAGACCTGACTGCCCTTGACCAGCATAAAACACATCCTGTGGCAT  
 ACTGCATTAGCATGTAATAGCCCCGTGATATGTAATCTTTCAGGGAAGTTAGGAACCAATATACACAGGCAGTTAGGAA  
 AGCAAAGGTAGCTTTTTTCAAAACAGAAATTTTCATCCTGTAGCACAAAACCTCAAATAAGTTCTGGGACACTATAAAATCCA  
 ATGAGAATAAGAGCACCTCCTCCCAGCTGCCAATGCACTGAGTCTAGGAAACACTGTCACCACCGATAAAATCTATGATT  
 ATTGAGAATTTAAATAAGCATTTTTCTACGGCTGGCCTTGCTTTCCACTGACTACCCCTACCCTGGTCAACAGCTCTGC  
 ACCCCCCACAGCAACTTGCCCAAGCCTCCCCTATTTCTCCTTCACCCAAATCCAGATAGCTGATGTTCTGAAAGAGCTGC  
 AAAATCTGGATCCCTACAAATCAGCTGGGCTAGACAATCTGGACCCTCTTTGCAACCCTTATTACTAGCTGTTCAACC  
 TCTCTTTTCGTATCGTCTGAGATCCCCAAAGATGCGAAAGCTGCCGGTGCATACCCTCTTCAAAGGGGGAGACACTCTA  
 GACCAAACTGTTACAGACTATATCTATCCTACCTGCTTTCTAGGTTCTCGAAAGCCAAAGTTAATAACAGATCAC  
 CGACCATTTGCAATCCACACCGTACATCTCTCGCTATGCAATCTGGTTTCCGAGCTGGTTCATGGGTGCACCTCAGCCACGC  
 TCAAGGTCTAAACGATATCATAATCGCCATCGACAAAAGACAATTTCCCAATTTCTGGTATCCAATTTGGTAGTAGTT  
 ACAGTCTTGTCTCATCGTGCACCTCCCGTACGGACTCGGGAGAGGCGAAGGTCGAGAGCCATGCGTCTCCAAAACACA  
 ACCCAACCAAGCCGACTGCTTCTTGACACAATGCCATCCAACCCGGAAGCCAGCCGACCAATGTGTGGGAGGAAACA  
 CCATACACCTGGCGACCGTGTGAGCGTGCCTGCGCCCTGCCCGCCACAGGAGTGCCTATGTTTGAAGTCAGTAGGTCA  
 CAGCAACAGGAATTTGAAATTTTACATTTAGAAAATTAATGTAAAACCATGTGAGATGAAAATGGCAACAAATAAAGG  
 GTGTGCAATGTGTAGTCCCCTCAGTGGACATTTGAACTTGTGTTGAAGTCAGTAGGTACATGACCAATGAGCTATTG  
 AAATTTGAATGTAAAATAGTTTTGACTTTGTTTACGCTCCCTAACTATTTCAACTAGGAAAACAAAATGCTGCTCACAT  
 TTCCACATGTTTTATTAGCTTTGGAAAGCGAATTAACGCTCAAATCATGAAAATAAGACTTGTGCAATGTTGTGCGCAATT  
 TTTCCAACATCATGACTTATTTGGTGTCTGTGGCTCAAGTGGTTTGAAGCTATTGAGGTTTGAAGTGCGAATATCC  
 GTTGAATATCCAACCTGAAACTGTCTTTACCTCGGTGGGGACCATCTATTTATTTAAATGGAAGAGCATATATGACCAT  
 AAAGCAAGCCGAAACGATGATACATACTTATGGATACATATTTAATGAACAAGTGTGTTTCCCTTGTGTTGTCAAC  
 AATGGTTGAACAGTTTAGGGATGGAGTTGATACATTTCCACTTCTGTGAAAATTAATCCACAGCACAATATAGGCTAG  
 CCTAACAGCCAGTTGTCTAGAAAAGTTAGTTTTCTGTTAACAGCACTAGTGCATTGCAATAGTGAATGTAAGGCGAGAT  
 GTCTTTGTTTTGATAAATTAATAATGAATATTGAGTGGTCCAGTAGACAAAAGACTTTATCGTAAGCGTCTCGGGGAACA  
 ACTAGAAACACTCTTGATGCAAGTCAAACATTTAACACATAGTTTATTTCTCGTGAAGAGCTGATTCAAATATAACATGG  
 AAACACAAACACTCTCATTACACTCATTCACTGCTGTGCTGGGCAAAACGAATTCCTCATATTGCGATAAACACATTT  
 AAAGCACCCCAAGCTTAGGGGCATTTTGAATATCATCCAAATTTATGTGCAGTCAACATACAAATCTGCCACTCTGTA  
 AGCTTAATATCAGACAACAACATTCGAATTAGTCTCTATAGCATTATGCACTGAATTGACACCTCATATTTACATACA  
 CAATTTTTTTGTTAAATTAACACTGATGCAGTCACTGATAGGATGTTTACTGTCAGCTCAGACATAACAGACAAAATGGT  
 ATGCTTGGTCTAGCCAGGTGAATAAGAAGCAAAAGCCATTTGCACTATAGGGCTACACCACATGCTCTGAGCAACTTTGAGC  
 CCATCTCTCCAGCATGTGTATCTCTCAGGTTCCCAGAATCCCAGGCAGCTCAGTCTCTGGTCTCCATGCGTCTCCCT  
 GGACTCAGCAGTAAGGAAAAGAAGTCTTCATCATCCATAGGGCCCGGGCCGACTGCGCTGCTCTCCAGCCTACCC  
 TGGGCTGAAGTACAGAGACAGACAGAAAACCACATGGCTTGATGCCATTTTTACTGACCTGAGGTACGGAGACGA  
 GACATTACACCTACGTAACACCATATGACATGATAAGTTGTTACACCATAACAATAAATCCTAATGCCATGTTACAGC  
 ACATGACACACAGGTGATGATATTCATTTGACCATAAAAATCCTGCAGCAACAGCATTTGAATGTTTGTAGTCCATAA  
 CGTTGCATGATCGGTGGTTAGGCTATAAACTGGCCAAAATTAAGTACATGAAAAGGACAATACTGTTAATATAAATGTG  
 TGTTAGTGCGGGTTTTTTGTTTATTTATGTAATAATCAGGAAGCTCATCTGCATTTTTCTGGGGGAGGAAAATTTCTCAGCA  
 ACAACAGAGTGATCAAATGAAGATCCTTCATCTGTAATGACAATGTAGCACTGTAACATGATCTCAATGTAACACCATAT  
 TTACATTTACATTTGACATTTTAGTCATTTAGCAGAGCTCTTATCCAGAGCGACTTACAGTAGTGAATGCATACATTTT  
 ATACATTTTTTTCTCCGTAATGATGATGCCCCACATTATATTTGCTTATGACAAGAACAAAATAACATTTTGT  
 TCAAATGACTACTGGCAGCTTGGGTGATTACAGTTATTATAATTTTTTATTTAACCTTTTTTTAATTAGACAAGTCATT  
 TGAAACACTACTTTAATTATCATGATGGCCAGTTACTTACCTGCGACATGAGAATCATATTGTACAAGTCTCCTGCTG  
 CACTGCAATTTGGAGCAGACTTTTTGGGCTTTGTATCTTTTACGCTGCTCCTCTTCTTATTGGCTTTCCGCTTAGGGGTG  
 GGGTGTGATGTAGTTCCGCCCCGCTGGTCTCAAGCCGACGGCCTTGGGAAGTAGCCAGCAAGTCAAAGAAGTCACTTTT  
 TGCAGCGAGGTCAATTGAGGAGAAATGCACTGTTGGGAATGGAAGGGGAGAAAAGAGAGTGAGACATGCTACATTTAGTG  
 GCCTAGTTTCAATTTGGTGTCTTAGTTAATCATTCAAGCAATATATTTCAATATTTCACTAATGTACAGAAAGACATCCTAA  
 TATCTGTCCCTGCCACAGTTATATGATAGAAGTGCTTCAATGGATGTTGGTACCCTACAGTTATTTACAGCTTTTCCCT  
 TCATGAGTCAGCGTGTATTATGGGAAAACAAGGAAGCTAATTACAACAGCTGTTATGTTTACCACAGTCAGTTAGTTAGT

TATCATTACAGGGAGTTGTTTTACATTTCTATCACCTCTGTGGGCTCTGTGGGCTGGACTGTAGGTGTTGGGTTTCCAGAAT  
 GGCACCTTCTCCTCCTCTGAACGAGCACCCTGGTTCATTGAGTCGCTTCTTCTTTCGACAGTAAAAACCAGGTTCATAC  
 AGAGCGTCTGGGAAGTAAGGGGTTAACCGTTGAGCCTGAGAAAGACAGGTGGCAGGTGGCAGAAAGTAGTATATTATCA  
 AGGATTTCAAATGGTGGTATCATTCTACTTTCACACAGCTGGCATTTCACACCTACAAATTCGTAACCACAAAA  
 TGAACCCCTCATTCTCCACCCTGGAATGTTGTTTTGTTCTTTTTATATATGTGAAAGAAAACCCCTTACATCAAAAAC  
 TAATGCTACATCAAAATGTTTAGACTGGTATTCCGGTCACTAACGGAATTATTGTAATTGTGGGCACAAGGGAAATTGCTG  
 TATTTTTTTGTGAAAGCAAATGTTATAAACCTGTTTTTGGGCATGCTCTGGGCTCAGCGTATCTTTGGGCAACTGGTCAA  
 AGGGAAGATGTATATTTGTGCCAACTGTAAATCCTTGATGGTTTTGCCGTCTCTTGTCTGCTGTTTTGTATTTTTCT  
 GTTATATCCACCATCACCATCCCTCTTTCTTGCAATCTATTTTCTGTCTATCCATTACCAATTCATCCATCCCTTTAAT  
 GAGCTCAACCCCTCTCTGTCCAGTCTCTCCTTTTTCTTGATTTATTTGGTTATCCCTTTTTCTTTTGTCTCCATCTC  
 CACTTTCAGTGTGGCTTTTTCCAATCTGTCCATGTCTGGCAGTGGCATCTCTTCCACACTGGAGTCTTCATCGTTGATC  
 TTGCTGTATTGGCTCTGTCCCTCCCTCAACAACCTCTCAACATCCCTCCTTAATAATGACTAGATCCTCCAAGTG  
 CTCCTCTCAGCTGTTTCAACTTTGACCCCTGGGTATTCATGACNNNNNNNNNNNNNNNNNNNNNNNNNNNNNNNNNN  
 NNNNNNNNNNNNNNNNNNNNNNNNNNNNNNNNNNNNNNNNNNNNNNNNNNNNNNNNNNNNGATTGTGTAACCTGGT  
 TGTAAAGAAAATGTTTTAGGTAATCTAAAAGAGTTTCTTAAATGTTAACTTGCAACAACACATGTAGAAGACTTCTAGTG  
 TGACACAGACTGAACGGCCACTGTATCTGTAAGCATAACAGTATAATCTCAAGAGGGGTGTTATGAAAAACAGTACTG  
 GTTTCCTGCTCACTTCTTAAAGGCATAAATTCCTATCTGGATTTGACTTGCCTGCCTGCTAATCATTACCTTACCCAC  
 CCACGCTCTGAATAAGTCTATCGTACCTGTGTTTTCTGGAGTTCAGTTTCTGATAAACATCATCTTCTGTGTCCACAC  
 TGATTAGGGATGGCATCACTGATTACAGACAGTTTTCTTCATGAGAATAATTGCTATCAGTTATGCTTACATATCACC  
 GTGACGAGCTCTTCTCGCTCTCTTCTCTGCTGCTGTCAGCCCTTAGTCTCTTCTGTTCCCTTACCCCAACC  
 CACCCTATTTATTTGTCCCCTATCTCTGCGTCACTGCATTATGAAATATTACTTTAAAAAGTGAAGTGGTGTGATGT  
 TATAGCCAGTGGTGGCATGTTATCAAAATAGCCTGTTTTTAACAAAGCCAAAACCTCATTATTTGAGATGAACATCAGAAA  
 GGGGAAATTAATGAAATTTGCTCTGCTCATGTGCATTTTCAGCAGAACAGCATAACAGTCAAGAACAGCAACATGT  
 TGAACAGGCCACTGTTTTCTGATAGGGGCTGTGTTTGCATACACTTCTGTTGACTTGCAGCTAAAGGAGAAAGTGA  
 CAAAGTGTGTGAGAGAGAGAGAGAGAGAGGGGAGAGAGTCAAGTGTGAGATGTTGATTTCTTTTTGGTGAAGTGAAGAA  
 GAGGGGAGGGTAATTTGTTCAATTTGTGTGATTTCATATATGACTTGTCTGAACTATTTCTGTAGTTCAAAAAGTGTCTGCT  
 GTTTATCATCCATTGATGTATAAACTTGATCACTGTGAATTAATTTGTCAAATTTGACAAATCTGTTAATATCATGGAG  
 TGCATGTATTGTCCCGTGTGGTGAAGTAGGCAACAACACATCTGCCACGCTGACCCTCAAACCTTTTTGACTCATCACA  
 TACACAGCTGCTACTGCTTATTATCTGTCTCTTGCCTAGTCACTTTACCCCTACCTACAGTTGAAGTCGGAAGTTTACA  
 TACACCTTAGCCAAATFACATTTAACTCAGTTTTTCAAAATTTTCAAAATTTTCAAAATTTTCAAAATTTTCAAAATTTT  
 TCAGTTAGGATCACCAGTTTATTTTTAAGAAGTTGAAATGTGAGAATAATAGTAGAGAGAATGATTTATTTTCAAGTTTAT  
 TTATTTTCAATCACCAGTGGGTGAGAAAGTTTACATACACTCAATTAGTATTTGGTAGCATTGCCTTTAAATTTGTTTA  
 ACTTGGGTCAAACGTTTCAAGGTAGCCTTCCACAAGCTTCAACAATAAGTTGGGTGAATTTTGGCCCATTTCTCTGACA  
 GAGCTGGTTTTAACTGAGTCAAGTTTTTAGGCCTCCTTGTCTCACACACGCTTTTTTCAAGTTCCGCTATACATTTTCTATGG  
 GATTGAGGTGAGGGCTTTGTGATGGCCACTCCAATACCTTGACTTTTGTGTCCTTAAGCCATTTTGCCACAACCTTTGGAA  
 GTATGCTTGGGGTCATTTGTCATTTGGAAGATCCATTTGGACCAAGCTTTAACTTCTGACTGATGTCTTGAGATGTTG  
 CTTCAATATATCCACATCAATTTCCCTACTTAATGACATTTATTTTTGTAAGTGCACCAGTCCCTCTGAGCAGCAAGCACC  
 CCACAACATGATGTGCCACCCCGTGTCTCACAGTTGGGATGGTGTCTTTCGGCTTGCAAGCCTTCCCTTTTTCTCTCC  
 AACATAACAATGGTCATTATGGCCAAACAGTTCATTTTTGTTTTCATCAGACCAGAGGATGTTTCTCAAAAAATATGAT  
 TTTTGTCCCATGTGCAGTTGCAAACCTGTAGTCTGGCTTTTTATGGCAGTTTTGGAGCAGTGGCTTCTCCTTGCTGAG  
 CGGCTTTTCAAGTTATGTCAATATAGGGCTCATTCTACTGTGGATATAGATACTTTTTGTACCTGTTTCTCCAGCATCTT  
 CACAAGGTCTTTGCTGTTGTTCTGAGATTGATTTGCAATTTTCCGACCAAAAGTACGTTTCTCTAGGAGACAGAACGT  
 GTCTCTTCTGAGGGGTTGTAACGGTGTGTTGTCGGTGAAGGAGGACCAATATGCAGCAGGTACGTGAATACTCATCTTT  
 AATTAAAAATAAAGGAGTAAAGCATCCACTTAAAAATTCAAACAAAGTAAACAACAGCTACAGTTCTGACGATCAAAACGC  
 AGTGCAAAAACAACCCACAACCCCAAAGAAAAACACACACCTATATAGGACTTCCAATCAAAGGCAACTATACA  
 CACCTGGCTTCAATGGAAGTCCCAATCATCCACCAACATTTAACAATAACAACATGCCACGCTTACCCCAAAACT  
 AAAACACTAGCTCCATCTGCTGGTCAGGACGTGACAGGGGTATGATGGCTGCGTGGTCCCATGGTGTTTATACTTGCGTA  
 CTATTTGTTGTTGATGAACGTGGTACCTTCAAGCATTTGGAATTTCTCCCAAGAATGAACCAGACTTGTGGAGGTCT  
 ACAATTTTTTCTGAGGTCTTGGCTGATTTCTTTTGTATTTTCCCATGATGCCAAGCAAAGAGGTAGGTTGAAGGTAGGC  
 CTTGAAATACATACCAGGTACACCTCCAATTGACTCAAAATGGTGTCAAATAGCCTATCTAAAGCCATGACATAATTTTT  
 TGGAAATTTTCAAGCTGTTTAAAGGCACAGTCAACTTAGTGTATGTAATACTTCTGACCCTAGGAATTTGATACAGTGA  
 ATTTATATGTGAAATAATCTGTCTGTAAAGAATTGTTGGAACGTTACTTGTGTCTATGCATAAAGTAGATATCCTAACCGA  
 TTTGCCAAAACCTATAGTTTGTGTTTACAAGAAATTTGTGGAGTGGTTGAAAAACGATCTTTAATGACTCCAACCTAAGAGTA  
 TTTAAACTTCCGACTTCAACTGTATGTGAAATATCTCAGTTACCCTTAGTAACCTTTGCATGTCAACTCAACAGGA  
 TTCAATTTCTCGGGCCGACTCTTTTCTGTATACCGTAAATTTCCGGACTATAAACTGCAATTTTATTTCCAGGCTTTGAA  
 CCTCGCGGCTTAAACAATGACCGGGCTAATGTATGGATTTTTCCCGCTTCAAATTTTTTCTTCCAAAAAACACATTC  
 TGTGACGTGCTCAGTTTTTTTGGCGGCATAAAGCTTTTTCATTAGACCAATGAAATTTGCCGAACGGGTTAAGGTCTAAGGT  
 AAACAACTTTTTTGTTTACTGTTTAGATTAAATCGAGCGCTCTCAAACCTTCCCATCATCTGATTATGGTAGTCATTTTTG  
 TCACCCTCATCATGGCAAAGACACGGAGAAATGCATATGATGCAGCTTTCAGTTGAAGGCGATTGATCTGGCTGTTGGA  
 AAAGGAAATAGAGCTGCTGCATGGGAGCATGGCTTAAATGAGTGCATGATAAGACGTTGGAACAGCAGCGTGAGGAATT  
 GACTCAGTGCAAAAAGACAACCTTACTACAAATGTTTTATTTTTGTTTACAAGTCGTGTTTCGTTAAACCTATTTATTTT  
 TGGTACAAGCCGTGTTTCGTTAAAGCCTATTTATTTTTGTTTACAAGCCGTGTTTCGTTAAAGCCTGTGTAAGTTCAATTT  
 GTTCAATGATGAGCTAGGACCTGCGGCTTATAGACATGTGCGGCTTATTTATGTTAAAAATAAAAAATAAAATGTAAT  
 TCAGTGGGTGCGGCTTATTTTCAAGTTCGCTTAAATAATAGTCCGGAATTTACGGTATATCAATGATGTCACTCTTGCTG  
 AGGGGATTCCCTGATCCACTTCTACGCAGACACACCATTCTGTATACATCTGGCCCTTCTTTGGACACTGTGTTAACAA  
 ACCTCAAACGAGCTTCAATGCCATACAACACTCCTTCCGTGGCCTCAAACCTGCTCTTAAACGCTAGTAAACTAAATGC  
 ATGCTTTTCAACCAATCGCTGCCGGCATCCGCCCGTCCGACTAGCATCACTACTCTGGACGCTTTTGTACTTAAAAATATGT  
 GGACAACATAAAATACCTAGGTGCTGGCTAGACTGTAACCTCTCCTTCCAGACTCATATAAACATCTCCAATCCAAAA  
 TGAATCTAGAATCGGCTTCTATTTCCGAAACAAGCCTCCTTCACTCACGCCGCCAAACATATCTCGTAAACTGACT



ATCCCTACCGATCCGGCGATGTCATTTACAAAATAGACTCCAACACTCTACTCAGCAAACCTGGATGCAGTCTATCCCAGTG  
 CCATCCGTTTTTCGTACCAAAGCCCCATATACCACCCACCCTGCGACCTGTATGCTCTCGTCCGGCTGGCCCTCGCTACAT  
 ATTCGTCGTAGACTCAGAGCTCCAGGTCACTATAAGTCTTTGCTAGGTAAGCTCCGCTTTATCTCAGCTCACCCTGGT  
 CATGACAACAACACCACCCGTAGCACGCGCTCCAGGATATATCTCAGTGGTCATCCCCAAAGCCAAACCCCTTTTG  
 GCCGGCTTTCTCCAGTTCTCTGTGACAATGACTGGAACGAATTGCAAAAATCGCTGAAAGTTGGAGACTTATATCTCC  
 CTCACATACTTTAAACATCAGCTATCTGAGCAGCTAACTGATCGCTGCAGCTGTACACAGCCCATCTGTAAATAGCCCAT  
 CCTATCTACCTACCTCATCCCCATATGTTTTTATTTACTTTTTTCTCTTTTGCACACCAGTATTTTCTACTTGCACATC  
 ATCATCTGCACATCTATCACTCCAATGTTAATTTGCTAAATTTGTAATTACTTTCGCTACTATGGCCTATTATGGCCTTAC  
 CTCCTCATGCCATTTGCACACATTTGTATATAGACTTTTTTTATTTTATTTCTTCTATTGTGTTATTGACTGTACGTTTTGT  
 TTATTCATGTGTAACCTCTGTGTTGTTGTTGTGTGTGTGTGTGTGTGTGTGTGTGTGTGTGTGTGTGTGTGTGTGTGTGT  
 AACTTGTCTCAACTGGCCTACCTGGTTAAACAATGTGAAATAAAAAATAAATAAATAAATAAATAAATAAATAAATAAATAA  
 TATATAGCCAAGTTATCATTACCCATGGTGTATTTATCTTGTGTTATTATTTTTCTATTTTTGTCTCTACATTGTTGG  
 GAAGGGCCCGAAGTAAGATTTCACTGTTAGTCTACACCTGTTGTTTACGAAGCATGTGACAAAGGTCAGAGTAAG  
 GATTTCACTTTTGTCTACATCTGTTGTTTACGAAGCATGACAAATAAAAAGTGATGAAAAAATTTGTTGATGATTTGAT  
 TGGTAAAGACCTGTGACCTTATTATGAAGCTGATGCATTATTACATTAACCTGATATGAAATCAGAAGATGATCCCTCCCC  
 CCATCATGGTGCAATGCTCAATGTATTAGGCTACTTGAGATGAAAGACCCCTCTTCTCTTTTTCTGTTTCTCT  
 CTCTTTTACACATAGGCATACACACCCGTTGCTCATAGTTATATCCATCTACCTGATGTTTCATAAATAAATAAATAAATA  
 TTTAAAGTCATAGCTATGAATATCCCTAGTACAGTACGCTATGGGCTGTGTCTGGAGTACAATTCGAATTTTATGAACAT  
 TCTTGTTCGAGACTTTTTCTTTGTCAATCGCTAGGGGACTCTAGTGCAGGCTGTCTAGTGTGTTGAGTTTTGAAGGGTG  
 TGTGACTGTGATTACTCGTCGGCGCCACTGTGTGCCGCTCAGGATGTTGCAGCAGCAGCTCTCACTGGCAACGGGCCCT  
 CTAACGGCCGGGCCCTGGCCTGAGCTCTCACCCCGTATGCACCCTTAAACTCGGTTTCATCCATCTTCCCACCACCGC  
 TCCGACGGAGACCGGGCCAGAAAGCGCAGAAAATGGACATGAAAGCCGACAGAGACATTTGGTGACATATTGCAACAAT  
 CATGACCATCACCGACCAAGTTTGGACGAAGCACAAGCAAGTTAGTACAATTTTATAACTTAATCAGATTTAGCT  
 ACACATTTCTGCAAAATTTGCTCAATGGCCAAAGAGTTAGCTAAAAGTTTTTCAGAAGTTTTCAATTTGATCTACTTTGAAGTT  
 TTTTAATAAGCTTGTAGGTAGCCAACGTTGCTAGCTAGCTAACTGGCTTGTGTGCATGATACGTTGTTTATTAATAAGT  
 TATTACTTCTTCTCTGGCCTATTTACACGCATGTTGTTGTTGTGAAATGTATAAAAACCGAAGTTGTTTTTGTGGCTAA  
 CTCGATGAAGAGGGTGAATTTCTGTAAAGCTAAAACCTGGCCAGTTAGCTAGCTATGCTCTATTGCTTTATTTGTTAGCTTG  
 CTAATGTGTTACTACTAACCGCTTAGCCGGTTAGATTTACATGTTAGTGAATAGCAAGATATTATAAACGGATTGTGGCC  
 ATAATCTTGGCATTATCCATTTTCATGCTACATTTGTTCTACGAATAAATAAATAAATAAATAAATAAATAAATAAATAAATA  
 TGCTAGCTAGCCATAGCATTACGTAAGCTAACGTTAGCTAGCAGGCTGCAGTGAACCTCAGTCAAAAGTTCAGCAACAAC  
 AGAGCCGATGTTTTGTTGTTGTGTATGACATCTAGTTAACGTTAGCTAGCTATATAAAGCGTGTGAAAGCAGGAGCTAGC  
 TAACTAAACAATAATTTTGTGGTGCTAATGGCTCGTTGCTAAATAGCTGGCTAGATATACAGCTACAGTAGCAACGTTA  
 GTTAGCTAATAATAATAATGTTTTTTTCCAATCGTCAGAAAACACGCATTTGAATTGCCATCGAATGAAACCAGCTTTGTT  
 CAGCGTCTTATGTGAGATCAAAGAGAAAACAGGTAAGTTTCAATTTTCTAATTTGAAACCTTTGTTTGAATTTAAACTTG  
 TTGCTAATTCGTTTTAAAGTTTTCTGGCCATCTGTGATGAAAACAGAAGATGATGTTGACTCCATCAATAATAATGAGT  
 TGCGCATAATCCATGCAGTTAGATGACAGTTAGACAAATCTCTAGCTATTTTACATTTTCAACAAAGATGATTTGTGTAT  
 GATGACTTTTCAAATTTTGGCAGATGACCCTTCTTTATATGTTTTCATCCACAAAGTGTCTTCCAGCTTCCAGTACCCT  
 CAGAGGGATAATATTTGAATATACACTGAAACAAAATGTAACCGCAACATGTAAGTGTCCCATGTTTTCATGAGCTGAAA  
 TAAAATATCCCAGAAATTTTCCATATGCATTTTTGTGCACAAATTTGTTTACATCCCTGTAGTGAGCATTTCTCTTTTGC  
 CAAGATAATCAATCCACTGACAGGTGTTGGCATATCAGGAAGCTGATTAACCTGCATGATCATTACACAGGTGCACCATG  
 TGCGGAGGACAATAAAGGCCACTCTAAAATGTGCAGTTATGTACAGATAACTCTAGGTAGTGTGCAATTTGGTATGCAG  
 ACTGCAGGAATGTCACCCGAGCTGTTGCTAGAGAAATGAATGTTTCTTCTACCATAAGCCGCCTAACGTTGTTTT  
 TAGAGAATTTGGCGGTACATCAACCAGCCTCACAAGCAGACCATGTGTAACCACGCCAGCCAGGACCTCCACATCCG  
 GCTTCTTCACTGTGGGATCGTCTGAGACCAGCCATCCGGATGGTGTGATGAAACTGTGGGAATGCACAACAGAAGAATTT  
 CTTGACCTGACTTCAGTTCGGCAGCGTAATTGACTTCAGTGGGCAATGCTCACCTTCGATGGATATGGCACGCGGGAGA  
 AGTGTGCTCTTTGCGGATGAATCCCGGTTTTTCACTGTACCGGGCAGATGGCAGACAGTGTGTATGGCGTCATGTGGGCAA  
 GTGTTTGTGCTGATGTCAGCGTTGTGAACAGAGCACCTATGGTGGCGGTGGGATTATGGTATGGGCTACGAACAACGAAC  
 ACAATTCATTTTATCTATGAAATTTGAATGCACAGAGATACCGTGACGAGATTTCTGAGGCCCATTTGTTGTGCCATTTCA  
 TCTGCCGCCATCTCATGTTTTCAGCATGATGATGCAAGACCTCATGTCAAAAGATCTGCACACAGTTCTCGGTGATGCT  
 GAAAATGTCGCCGTTCTTCCATGGCCTGCACAATGTCAACCATTGTTTGGGATGCTCTGGATTGACGTACACAGAGTGT  
 TTTCCAGTTACTGCCAATATTCAGCAACTTCACACAGCCATTGAAGAGGAGTGGCACAACATTCCAGAGGCCACAATAAA  
 CAGCCTGATCAACTCAATGTGAAGGAGATGTGTACGCTGCATGAGGCAATGGTGGCTACACCAGATTCCGGTCAGGCTG  
 GTTTTTCATATCCACGCCCTACTTTTTTGTATATCTGTATTCCAGTCATGTGAAATCCATAGATTAGGGCCTAATGAA  
 TGTATTTCAATTGACATATTACCTTATATGAAGTGAAGTCAAGTAAATCTTTGAAATTTGTCATGCTGCATTGATATT  
 TTTGTTCAAGTGAATAGGAGACATTTGAACTCTTAATTTACCATGAATCAGATTGACAGACCTCTCTTGTGTCAGGCCTA  
 TCAATGCGAAATGCTCAGGAGGAAGATCACAGGCCACAGCTGGTGGATTGGACAACATGCTGCTGGCGGAGGGTGT  
 GGCTGGGCGGAGAAAGTTGGCGGGCGGACGCGGCGTGTCCGACGCCACAGCTCTGGAGGATGTCCGCAGACAGCT  
 CACTGGAAACTCAGACTACAAAAGCAAGTTGAGCCAGATTGCAACATCTATCACACTGAGATGGAGAAAATGACCAG  
 GTACTTTTCTAGTTGTGCTTTTTTCAAGCAGGGGGCAGTCCCAATCTTTTGTATTGTTTTTTTTGTCATATTGAAGAG  
 ATAGTAAAGTGTGGAAAGACGGTTAAGATAGAGGGAGGGTGAGTCAAAGAGCAGTGGCCGGATTCAAACCTCATATCGA  
 CTCTGACATACAGTGTGCTGGGGTCAAGTGGCTGTACTTTGATTTGAGGTGGAGGGACTTGACACTTTGCACACACTGAAA  
 ATTACACCCTTTCCGGAAGTAACTAAAATGAGGTGATGTTTTTAAATTTAGGTGAGATAATGAACGTGAACATAAATGAC  
 CAGCTCAACAGTGTGGCCGCTGTTGACTTCCATCTTTTGTAGCTCAACTGACGGTCATATCTGTCTCCAATCCCCCT  
 CTCTCTCGCTCTCCGTGTCTCTGTAGGCATGTAGTGAAGTTCACTACCACGCTGATGAACCTGTGAGGGAGCAGTCCCCG  
 AACCGCGCGGTGTACCCGAGGAGATCGAGCGCATGGTGGCCATCATCCACCGCAAGTTCAGCTCCATCCAGACACAAC  
 TCAAGCAGAGCACCTGCGAGGCGTTATGATCTGAGGTCGCGCTTCTCGACGCCAGGTGAGCGTGTAACTGTTATT  
 GGGGTGACACAACCTGTCAAACCTGCCATGACAGTGAATGCAATTCATGTACAGGTAGTATTTTTAATGAAGAGTA  
 AAACATTCATAAATGAACAGTGGTTCATGGTTCATACCAGTCATATTTACAGTGCATAATCATGTTATTACAGTGCAGGT  
 TGTGAATGACTATTGTGTGTCAATATCAGTTGTTACTGTAGTTGTGAAATGTATACTTCTGCCTGGGTTGCATGCCACT

CTCAACACACTCACCTTGTGTTGTGAGGCGTAAGAGACGTAACCTTCAGCAAGCAGGCACGGAAGTCTGAAACGAGTAT  
TTCTACTCCCATCTCGCCAACCCCTTACCCCAAGTGAAGAGGCCAAAGAAGAAGTACGCAAAACAGTGTAGCATCACTGTCTC  
TCAGGTAACCTTGTGCATAAAGTATAAGTATATCGGTCATATATTTACTATTTAGCTCACCCATTGATACGTCATATACA  
GTTGACTCCATTGACACGCTTCTTACTGGCTCGTTAATTTGAACAGGTGTGCAACTGGTTGGCAACAAGAGAATCCGCTA  
CAAGAAGAACATTTGGGAAGTTCCAAGAGGAGGCCAACATCTATGCCATGAAGACGGCCATCGTGGCGACACAGAACGAGG  
ACTCTCCACACACGCCCAACTCAACAGGTAAGAGCTGAGGAAAGGAAGCCAGGCCCTAGTGATACACACTGTTTTGAGTGT  
ATGGTCAATTGGTAGTAGAAATCGATGGGTTGTTAGTGTTTTTGTGTACGGATCAGCAAGGGGAAGTGCCTCCATA  
CCTTCAGACTATGCTCAAACCTTACTCTCAACCCGCTCTGTACCTCTGGTCTCTTGACGCTCCCCTCATCCCATTCA  
AAGCTCTTTTCTTTTCATAAATACTTTCTACCCTAAATAATCTACAAGATCAGAGTATTTTTGAAATCTACCAATGG  
TGCTGAAACGGAGCAATATGCATATATTTAGATGTCTTTCTTTGATTGATCCCTAAATTTCCGTACCAATTTCTCTCAA  
TATATTTCTGTTGAGTCTGTCAACAAAATTCGAACCTTAAAGGTACACCTTATTTAAAGGGATGGCTTAAAAATAAATGTGCT  
GAAAAACCTATTGAATGAAAACTCCACAAGAAAATCGGTTGACCAGCAAGTGGGAGGATTTTTGAGCGGTTGAATTACATT  
TAATCAGCGCATGCAAGGGAACCATGTCTGCAAAGCCCGTTACGCAACTGAATAAGATATGTCTGAATTACAACACTACTGA  
GAAGTGCCTAGGAAAGCCCTGCGTAAGAAAGGCGTCAATTTCTAAGTCGGAATTGGGCCCTTTTGTGCTGTTGTGCCA  
CCTTGCCCAACAATAGAAGTCGGTTTTACAGCGCAATCAGATCTGGGACCAGGCTGATGTTGTAGGCCCTAGTAGCCCTA  
TTAAAGACGTCCTCCCTTTGTTCCTCCACAGGATCGGGGGCTTCTCACTCACTGGACCAGACCTTTTCTGGGTGTTC  
CACCAATGAATGGAGACAGCCTGTCTCATGGGAGCAAGTATGGAACCTCACTGTCATTCACTTACATTTTACTATC  
ATCTTTATTTTAGCTGATCTAATTTAGAGACATTTCTAATCACAACAACCTTGTGGAGGAGTTGCATTTGGAGTG  
GAGCGGGTTAATGTAGGTTAATGCCACTACAAGTACCACGCTTTTTTCTCTTTGGCAGACTAATGGGAAGTGGCAAGG  
GCAAAACTCCCTCTGCCACTTCCCAGGAAACGACCCTCAGGAGACTCTGACTGATGGCCCTGCCACTTTGTG  
TTGATGACATAGATGAAAGATTGACAACGGAAAAGACTGAAAGAATGATATCACTTACTTTGGCTGCAGTTTTTGT  
TGCTTTTTCTGTTCTTATTGTCCAATGATACTGTTCAATATGTTTGTATGAGCTGAGTGTGTGTGTGTGTGTGATGTT  
TGATTTGGGATCATGGGTTTTGTTCCTACTATTTATATGTTACTGTGGTATGTGGGACGGGAGGCTGGGAATTTGA  
TTACCATTGTTTTATTAGCTATATTAATGCTTTTACAATAATTTTAGGATTTTCGTTTAAAGCTCAGATATAGTTG  
CATTTAGAGGATGTGGGGCAATAGAGAAAATCCAAGATTTTGTGTGTTTGTCTTTCTACTGGGCTGTTTTGT  
CTGTGTGTCTATATCATGAATGAAGTGTGTGTCTGGTTATGTTAACAGTTTGAATGAGTATATCAACAGTGTGTCA  
TTCTGTACAGTGTGAAAACACCTGTATTCTCTACCTCTTTTACAGTAAAGACTCTGTATTACAGTCAGTTGGTT  
TGCTTTGATTGGTTGATATTAGCATAGAGAGACAGGTCACCTCCTAATATGGCAGAATAAGAAAAATTTGAACATTT  
CGTTTATTTAGATTAGATTTAGAGTAAATTAAGTTACTCATTTTATGACTGAGTTTATTTCCCGTCTGTCAATCTACTG  
TTATTTAGGGGAAATGGCCCTTTTACAGAAAATGTAACACAGCAGATGATGACATGATGATTTTGGGTA  
ATTTACAGCATGATATCTCACAGCAGAGCCCTCTCCCTTACAAAAGCTGTTTGGTTAGAGTCAGGCATGTGGTTATTTAGCT  
TCTCACTTCGGGCTTCTGGTCTGCCTTTTTAAACTCGCTGCCCTCAATCTCTGGCGCTGCCCTGCTGGGGTTGTGCTA  
CTATCCACTATTGATCTGCGATCTGATTGGGTGGGAGCATCTGTAGGAGGACTATGGTCACTCTTTCTATGGGCTCATT  
GGCTATTTCTCTGATAAGGCAACATATGTGGTTCGGGCTGTGTGAAGTGGAGCGACGCTGCAGTGCATTCTGGGTAC  
AGGAGAAGGACCGCTGTGAGGAGCAGGCTGGGGTACAGGAAGTGGCGCTGCTCTCGGGACTTCTCGGGGCTT  
TCGCGATCTTCTCTCTGAGGTAACTCTGACAGTGTGATTTGGCCGTGGTGGACGCCCCATGTTCTGGGTAAC  
CAATCGGTCGCTGATTGGTTGAGCTGTGGCCGCAATTTGAGGGGAAGGGCAGTGCCTCTGCCATTTGAACATTAC  
TGTCAAAAGAAGAGGGAGATCATAACAGTGGCAGTGTGAATTTGCCTTATCAAATGAGTAAATTTGCTAAGTGTATT  
GTGAGTAGATGTGCTAAATGCCACAAGACTTTACCTTGGTGGAGGGCAAGACATATCCCGATGCCCTATGACACCAGAGA  
AGGAGGCACTTCTCCAGGGGAATCACCATTTGGCTATACAGCAAGGCACGCTCATCCACAGCATATCATTGGCTTGC  
TCCATAGGAATACGCCCTCTCTGAACCTGTGAGCCAAATAGGAGCTCCAGGACTTGTATGATGCATGCCCTCTCGGGCAAC  
ATCCAGTGGCCGCGTCTCTCCGATCAGACAGATCTGATTGGCCCCGTTCAGGAGCAGGAACCGAGCGGTGTGCTAGC  
AACCATGGAGGGCGGAGGAACAGAGCAGTCTCACCTATCAGATAATGGGAGTGGTATATATCAGAGAATGGGAGTGT  
CAAAGCAATAATATTAGATACCTTAAAGTTGAACCAATTTAGCAGCATTTAACTGAACATAGTTTTCTGAACTTCTC  
TTCTTAAATCTTACATAAAGTATGTGAAGAATCATAAAGCAGAGGCTTCTGCTGGCCTTGGTACCTTGTGTCTGTAG  
GTCCACCGCAGCACCCTAGCGAGTGAGGTTCTTGTCAAGGAGAGGTGGTTAACTGAGCATGCCAGTGGAGGGCTGATC  
TCCCTGGGAGAGAGTGTATTTCAAGTGGAGGAAGGTGAGGGAAGGAAGGTGGGAGTTTCAGTACAGAAAGAGAGGGAGT  
AAGTCAGCCAGTGAACAAACATTTACAAACAGAGTCAAGCCCAAAGGGTGAAGAATGGGGAAGAGGGAGATTTGAAAGG  
GAGGAAATGAGAAATGAAAATGATGGTGGAGGACTAGGAACTCAGCCGAGAGGGGAGAGCGAGAGAGAGAGAGAGAG  
AGAGAAGAGAAGCAATGAAGTTAATATGGTACATCCACACTCCCTGGGCATAGGGCAGATTAATTTCTGATCAG  
TTTTAGAGGGAGGACAGCGGGTGTGTAGAGAGGAATGGAAGGGAAGAGTGGGAAGCCATGGAGTTTTTACCAGAACAG  
AAGAGAAGAGAAGGGACATGAGGAGGACCAGAGAGAGATGAGGTCACTTACTGTTTACTCAACCCCTCAAAGTAAT  
ACAATATAGTAATATGATGTGAGGCACTGTGTTTATAAGCTCGTTATACACCCATGGAAGCTACATAACATTTATGGA  
CATTTGTTCCATGCAATATTGATTTTAAATAATTTGCACAATAATCCTCCCATGACACTCTACAGGGAAGTTTCGTT  
TACTTGGTTATTTTACCCTAACCCTAATTTGGTTAATAATGTAATTTGGGAAATTTGGGAGAGTAAAGTGATACCCAGT  
GTGGTCTGTGTTGTTGACCGCACCCAGCTCGTAGCAGCTCCAGTACCACACGGTCAAGCCACTCCGGACCAGCAGAA  
TCAGGACCACTGAACCATCTGGACCACACCATTGAACCGAAGCAGACTGTCAAATAAATGTTTGGTACCGTCAAATA  
ATACTGTAATAATAACCAGCATTATCTACAATTTAAATAAACATATTGACATTTATGTAGAATATTTATGGAACCTACT  
TGATTGGGTGTTCTGTGATGTGGGACGGGACAGCATTTCTCTCCATCCTCTTGGGGAGCTAAAAGTGGAGCTGAACG  
TCAATTTAGTTACATGCTTAGTTACGTTGTGCAAACCGTAAATTTATTTGTGACAAATGAATGTAAAGGAATAATGAATC  
ATTTTACAAGCCTATTAATACAGTATGTTAACCATGATCAGGTGATCTTACGTTGTATGGGTGATTTGTGGGGGCTGCGG  
TAGTGCTTCTGCTCTTGGCTTGGTGGTCAAGATGGACCTGTTGATGTCCTCCATAGAAGCTCTGGGTAAGTCAAGTGT  
ACTTCCAATATCCAGTCTTTTTTACGGGCTGAAAATCATAGTTTATGCTCTGAATAGCAGTACTTTGTCAGACTTA  
GTGATATGACTACAGTATCACTAATAATTGTGTAATAATAGAGGTAGTCCAACAACAGTTTTATCTTACAGACAGAGTAA  
AACTTCAGTTAGTTTTAAATGCCCCAATGGAACAACCTGAAAGCCATGCAACCCATTACAATGAAGCAAACCTGTTATCT  
GATCACAGCACTGTTGATTTACAAGAATGAACATCCTCAACTTCTCCATAATCATTCACTTTCGCTCACCAGCTCGA  
ATGGCATCCTCCCCAGTGGCTCTCTGCGTCTTTCTTCTCAGCCTCCTTGTCTTCTTCTTCTTATCCCATTCCTGTC  
TTTTCTCTCCTGCTGCTGCCCCCTGCTCTCGGTGGGGTGTGTGCTGTGCCATGCCTTGGCCACATTTGGCTCCGCTGT  
CATTTCCAGTGCAGTGGATCTGTGCCAAACCTCTCTCTCCTCCTCCTCCTCTCTGCTGCTGCTGCTCACCCTTCTG

ATCCAAAGACAACCATCAAGACCAACGCTATCACATGACCCATCTCCAACTTGGCCTTACACTGTCTGGACGGACACT  
 GGGCCAGGGGTCACCACCAGGAGACTGCTGCTACATGGGGGAGAAATCACACACACACACACACACACACACAC  
 ACACACACACACACACACACACACACACACACACACACACACACACACACACACACACACACACACACACAC  
 AAAGTTGGATTCCCCTTGATACTAATATACTAACTTAACTGAATCACTTTGGATAAAAAGCATCCATTAATTACAATA  
 CTGTATTACTATATCAAGCAAGAACCCTGTGGTTTGACTACATTTTTCAAGCTGTGTATTGTGTAGGCCCTAGGTGTATCTA  
 TCACCACCAAGCATTATTGTTAACAATGCTTGGTACCCTGCCAGCCAGGCAGGTTATGAAAGGTGTGTCTTGGCATGA  
 ACCATGAAACGGGAAATAAGTGGCTGACACAAACAGGAAGTTTCCAGGAGAGGGCAATAGCAACAGGAAATGGAGTGGG  
 CTGAGACTGGATGAAGGTGAGAGGTTGTCACCCTGGCGATGAGGAATGTAATGGAATGGGACAATGGAGAGGCTTGGCAG  
 GTGTGTGAGGGACAAAAAATCATAGCACAGGAGAGTTGGGATTAGACATGGTGTACTGTATAGCAGTGAACATTC AAGG  
 AAATGCAGTACAATCTTTGACTCTTATGCAAGCAAAGCACTTTTTGGTCAGTCATATCTTTAAATCAGTGACACATTCAC  
 GCAGCATCTTATAAAGTGATGATGAAAGGATGTGAGAGCAGTATATGTCAAGTACGTACAGTATTTTTCTCCTAATGATA  
 TATCCTCAGAAATCTATAAAACATAGAAGTGAGAACATCAATGTAAAAAAGATATGTTTTGTTGCTGGGAAGTATCAA  
 AATAAAGAAAGTGCATACTCCATGTATAAACTCCCATCAACTTAATGGGTATTTATCAACGTTTCCGCATCACTGTGCA  
 TTCTCAGGGTTGCTAGGAAGTACCATGTAGGACTTCTCTCTTTAGACGATTACCTAGTAGAGACTCTACCTCACTCTC  
 ACAGGTATCAAACATCATATCAACAAGATAATAGCTGGAAGATGGACTCACCTCGACACCACCTGCTCAAACCCAACAGA  
 ACAGCCGTCCACAGCACAGCATCATTGAGCCAGGCAGGTCAGGAGGATGGAGACGGCAGTACCCTACTCTCTCTCA  
 CTATCCTCCCAGCTGACCAGTGCAGTTACTAGGTCCAATGCCTTGGTCCGGCTATAGCAGGTCCGGCAGGACTTCACTC  
 CGCTCAGTGTGTGGGTTCTCTCTGGGTCTCTTGGAGAACCTTACTGTCTCACTGCGCTCCTGACTGCGTTCGCAA  
 TGGGACCATGTGCACAGTTTATATCTAAAGTGGTACACCCCACTTCCAGTGTGTACCACCTACCTCCCTTTCTCTAA  
 TTATTTTTCAGAAGCAATGCGGAAATATGTGGACAACCTCCTGCTACTGTGTGGAAAACAATAGGAGCGGGGTGTGTGTG  
 TGTGTGTGTGTGTGTGTGTGTGTGTGTGTGTGTGTGTGTGTGTGTGTGTGTGTGTGTGTGTGTGTGTGTGTGTG  
 TGTGTGTGGTCTTTGTGTGAGTCTGCAGTCTGCTTTTCTACTGATTATAATGCCTCAGGATGTAATCTTTCAAATGAACC  
 AGGCCATATTTCAAGGCAATCAAGTCCACCTTAAGTCCCCCGTTCATGCAATCATATTAATACGTTAAAAAAGGCAACACATTA  
 GAATACAGCTCCGAGTAGGCTGAGCTGCATATATCACTTTTTAACTCCCATGCAGGAGCATGCTCTCTGCATTTAAAAA  
 AAATCATCTTATCTACTGCAAACGACAAAATAAACTATTTCAAATCACAAGAAGAGATAATAACCTCCAGGAATGTGG  
 TGGGTCTTAAAATAGACAGATATAGCTGCAGGCCATATGTCTCTGTCTCAAATGAAAGGATGGATCCAGGAACAGGAA  
 ACTATGAGGTTCTGCCATTCACTTAACTCAGGACTCATCAATTTGTGCCAAGAAACAGCCTCACAGCAGGTGGTACAA  
 CAAAGATTGTGTGACTTTTTCAAGTTTGGGGGGGGGGGGGGGGTCTATTTCAAGCTAAGACATACTACTTACTCATTATC  
 TGGGCAAAAACCTAAAATCGTTTTTTTTTATATGATGAGTTTATATATAAACCATTAGGCTGTTGTGCATTTGTGCGAGG  
 AAATATGCAATAGATGATCATGGAAATAATGTTTCAATGATGGTAGTGAATGATTACGATTATTGTAGGTCAT  
 CAAGCTTTCCACACGATGTGCTATTTCTATATTAGATTCTTTCAAGTTCAAAGGTGAATCAGCCAGTAGTAGTTACT  
 GTACAACATTTTCATATATAACCAAGCCCTTACACAGCAATCACCTACTCGTTTTACATGAAGTATAGCATAGTATAATTA  
 ATCTAAAATCGGCCCTTGCCAAATGTCAAGAGGGGGCGGGTCTTCAAAGGGACTTTCCAGTTTTATTTACTTTCCGTTTT  
 CTATTATGAAGCACATCATCAACTCGAACGTGGGGTCAAGTCCAGTCCGAGGCTGCTGCTGCATAACTAGAATAATAAT  
 AATATTGCCCTTTATATGATATGAGTGTGTAACATAGAACATAAGCTAGATCTATTCTTAATAGATATAGGCTATCGTTT  
 CCTTGACATTCAGAAGAAATGCAACCTCAATCGTAAGAGCCACATGCAACGCTGAGTAGTCTATATTTTTAAAAAGCT  
 ATTTAAACGTGTTTATTTATTTATATATTACAGCATGTTATTGTAATGTGTTGTTACAAATTCGTCATATCCATCAAGAAG  
 CCTAAAACACTTTGAAATTCACCTAATTTGAAAGTGAAGTAAAAATGAAGCATAAGATAAGAGTTGAATACACACTCTAG  
 CACCAATGCTGTCCCTTATTAGTCGGTCAGCTGTTTTTCATTAATGGTCAAACCTCCCTCCAATATTTTCAGATAATCT  
 ATGTCCCAGGGGTTAATTGGGATTTCTGTGCAACTAATTCCAAATGCCACTTTTTCCATAATACGCTATAACAGATC  
 TATGTGCACATTTCTGTTCCATATGCTATCCCCTTAGTCCCTCAATTTAACCCTGGATATGATGTTCTCAACCT  
 CATTATCCGTCTTCCCAACCTCCTGTTCTAGAGCCTGTTCAGAATGCCGAAAATGAACCTTCTCTCCGTCTCTCTCCTG  
 TGCATGGATGTGTGTGGTGCAGACAGTCCGCTTGCCCAACTCTCCCTCTTCTCCTCCACCATCCCATCACTACCTT  
 GTGGGTGGAAGCTTCTCCGTGCCGCTCCACCTCTTTCTACCTTCACTTCCATCCCTGGAAGTCCCCATGGATGAGCA  
 GCTTCGAGGGGCTCCAGAGCATGGGGTCTCTGCTTCCATTGCCACTCTACATCAGCCTTCTCTGGGCATGTGGCCAG  
 TCCATCTTGGGGCAGCTATGGGGATGGCATTCTGCGAGGGGGTGGGTGACAAGTCTATATTGCTATAAATFATGTTAATA  
 TATAACCCTTTTTGTTTTAAAAATGACAAACCACACAGACTAAAATCACTTGTTTTTAGCTACTTCAAGGGCTACTGC  
 GTAACAGTCTGATGATGTTTGTACTGGACACGCTACGTCCTTCTCTTCTTACCAAGCCCACCAAGGAACACAGAAGAA  
 GACTGGCCCTCTCTAGAGAAGCTGATGGGATACATGAAGCTTTATATACGCTTTGGAGCCGTGCTGAGTCTTTGTCT  
 TCATCTTCCCCTTGGTGAGATGGCTATTCCCACATGACCCGCGAATGACAGACTGGATTATGAATGAAGACAGCCCT  
 GAAGCCTTTACTCACGCCATCATGGTCATGTCTGATTACAGTCTGAGGTATAGTACAGCATATATCAATAATGGTG  
 ATACGATACTCTCGAGTCCCTCCAATTGATGCTCAGTGTCTGATACTGCTGTTTCATTTGAAGGTTTCAAGTGAATAAT  
 CACTTCCACAGGGCATTATTGTAATGATACTGTAGTAACGTGTTTTATTTGCCCTCCTTCTCCCATCTCTATCATTCACT  
 GCTGTGTGTGAGTTTGTGTGTGATCTCATCTACAACATCACCATGAGTCGTATCCACACTCCATCCAGGGCTTAGTCTT  
 CCAGTCCGTGCTGAAGCAGGAGATTGCTTTCTTTGACAAAAGCACAGACAGGTGAGTCACATTTCAATGCAATCTACAGGT  
 AACTGCCATAAATAAATGAAACACCAACATAAAGTGTCTTAATAGGGCGTTGGGCCACAACCTAGCCACCAGGATAGTCTCA  
 ATGTACCCTGGCATAGATTCTACAAGTGTCTGGAACCTTATTGGAGAGATTGGCACCAATTCGTCCACGAGAAATCCATA  
 ATTTCTAATAGGGATGCACCGATATGACATTTTTGCCCCGATACCAATATCCAATATTTTCTTACCAAAAAAAAAAAAAA  
 CATACCGATAGCCGATATTTAACATTTTAGCAGCCTTTAAGCATCTAGTACAGTTAAATAGTTGAAACCAAGTGTCAAT  
 ATGTTCAATTTGTTCAAGTATGGAACAGATTGTTTAATAACTTGTAATTAGAAAAATGACACATCCATGAATCTATTTTTAT  
 CGCACAACAGATATTCATGACACAAATATTTTAGCTGCCCGCATATAAAGATGGTTGCTGGTGGCTCTTCTTACTATC  
 CAATCTTGGATAAACTTAAATGCTTTGAAAGAAATATGGTTTAAACTAAAATGCAGTTTCAATTTAGATTTAACTGCT  
 TTGAAGAAATGACTGTCTTAGGCTGTATAACTGTCTATAAATGGCACAACCTTAACTTCAATGTGCTCACTGACTT  
 GACTAGTAAAAATGAGAACAATGTATACCACATCATCTCATCTTTCAATTTAGGAAATAAAAACAAAAAACAACCTGCTT  
 TGTTTTAAATTTAAATAAAAATCTTGACCGATACCAGCCATGAATGAACAACAGAAAGCCATTGGCCTTAGTAAATATTTA  
 TCCAGTGACTCTAGATGGCAGGGTTACAATATGACTGTCCATTTACAATTTTAACTTTGGGGGAGGTTTTCTTCCAA  
 AGAGAACCTGCTCGGCTTTGTGACAAAGAGAGTCTTTCTTTTATCGTCTACAATGTGTGAAGCTGCACTGAAAAGGGCT  
 TACTGTCCACACTAGTACAGGGAGCACCAAGGTACTTGGCGCAGCTTTAGCTAGGATGGGGAAACGGGCTTGTACTT  
 CTCAGTGTCCAAGTGCATCTTCATTCCTGGGAATAGTAGGTTCTGTCAATGTTGGCCGATGTAGTAAACAGAAAA





ATAACGGTTATATAAACAATCATCTGTGTTGTTTTTATCTAACTAGCTAGATTAGCCGCCTGAAGCTAAAGGAACAGGA  
TGTTTTTCTTGCAGGGTGTGGCATGTTAAATTACAGACAGCGTGGATAGCCAAACATAATCTAGCGCCTATGCGGAGTAG  
CCAATCGGAAGCAAGTATTACGAGAAACCCGACAGGAATTGCACGGAAACGCCACGTGATATGTTTTATAAAGCGGCAGGC  
GGAAGCTTTTTCCGGCCATTTTCAATGTAGAACTGTTGGCTTTTTATTTAGTGAAACAATAACAGTGGACAATTTGGAAC  
ATAAAAAAAGTCCGGATCCATCCTGATGGAACCGGCCGTTAACCCGCCCTTGACAGGTACCTTTAGGAACATTGTACCT  
TCAGGGTTCGGGTCGGAACGATTTTTGCAGGCTTGACTATTAACACGAATCGGGACTGAATGGCTAAACCTTGTAGCTAG  
TATTAAGTGTGCGTGCATCAGATAGCTAACTAGTCTTTTCTCAACTTTGACACCGAACAATGAAAATATTCGGTTGGCTA  
GTAAGATGTAATAATAGAGATGTCTTGTTCCTTACCCCCCTTAGTAAGTTATGTAGTGAGGATGGATATTGACATATT  
GTGGGTCAGCCTACTCAATAACTTAGTGTGGGGGATGTTTAAACATTGTCTGTGGTGTGAAACGCTTCATTGAGAGG  
CACTGCACCACCCTATTTTCTGCTATAAAATCTATGACAGAGAAATAAACTGAAC TAGGGCCGAGATGTGCAATTTA  
TTTTAGCTTATTTCAGTTGCCCTAACCCGGTTGTTTTACTTTTTGATGTTGCTAGCAAACGTTAGCGTTCCTGGCTAACTA  
GCTTAGTAGCTAGCTGGATTGTTGTTTACAAACGATGCGATGGTTCCAAGCTAGCCAGCTAAGTTAGCGTTCAGAAAT  
GGGGTCTCACATAAACAAGCTAGTAACAAGAGGAGCTGATTGGATAGTTGTGCAAGGGTTTCAGTCACAGGAGTTTGAAG  
GTTTTGACTGACGATCCTGAGGGTCTGTTTTGGCGTGGTGTGTTTTACAAACACTCATAAAAGGCGGGGCGACGACACTG  
ACCCACGCAATGACTACAAGCGCAGAAGCCTTGCCCTCGCCGGCTGAAATGATTGCCACAGTTAAGAAATGAAAGCATAT  
CACAATCTAAATAGCTAATGCCTTTGATTATTCCTATTAACCGTTAACACCCACGAATCCAAGTTAATTAACGAAAAT  
ACTTGGGAGGTTAGGTAAGTATAAACAACATGCATAGAGAGAGCAATAAACTGAACACTACTACTACTACTACTACTACT  
TCCAGGTTATCAAGGAATAATATTACTAATGTGTTGACAGATACTCTGCAGCTCTTTCCCTTTTCTTCAAAGGGTTAAC  
TTAACAAGCCATGTTGTGTTGGCGTGAAGTCTGAGAGGAAAAATCAGCTCATGAGCATTGCCTACTTTTGTGTGCTAGT  
GGGATGGAATGTGCGTGTGTGAGCCCTGGGGTACCGGGATAAAAAATCATCAAATCTGGTCCACACAGTGCAAAAGAT  
AAAAGCAATAGAGGGAGAACCCTGCATGTTTTACTATTCTATCACAGAATGCAAGTTAACTGCCTTAAAGTGTGTACA  
GTACTAGTGTTAGTACAGTAGTGTCAATGCTGCCCCAGGGATTTTCCCATCCAGTGATCTGGGTTGCCGGGGTGTG  
CCAAAAGTGGCAGCTATTGATAGAATCTCATTGCATGCTGAGGAGCAGATGGTGAAGGGCTGTGTTGGCGAAGGG  
TTCCCTTCCATAAGCTTTCCCTGCTTGAATTGCATAGCCTGACCTTAAAGTTTGTGTCATGAAGTTTGGCTTCCGTGGG  
GCAATGATCAAATATCAAGCACATTGTAGCTTACTACTTTTGAATGCCAGAGCTGAGGGATAATTTTAGCATATGAATG  
AGTTTTCTGCCAAATGTATCTCTCCCTAATACATCCCTTTCTGTCTTCCACGGGCTGTCTGTCTATCCCCTACTT  
CAACTCTCCACCTCTGCTCCTCTCCTGGTCAGTGTCTCTGGGAGTGGTGGGGCTGTCTGGCGCGGGATGGAG  
CACCATGCCTCGGGCCAGGCAAGCGCATGCGGAAGCCCTCGCTGCTGTATGAAGGCTTTGAGAGCCCCAGCTGCCGCA  
CGCGCCGCCCTCCCGGTCAGCCCCCGTCAAGGGCAGGGCCGCGGAGGGCTGCATGACCAACAGCTGCAGTTCC  
TCCAGAAGGCTATGATCAAGTCCCTGTGGAGGCACACTTTGCTGGCCCTCCATGAGCCAGTGGATGCCTTCAGACTC  
AACCTCCAGTGAGTTACTACTGTTTTGTCTATAAACAAGTGTAGAGATTAGTGGTCAACCAACTGGTCTAGAGCCAT  
AGGGGTTGCAAGCTTTTGTGTTACAACCACCACCATGTAGGCTACACCTATGAGTGTGTTGTCATAGTTGACATCCTGT  
CACACCACATTCAACAGTCAATTAATCTCTTTTTCTATATTCTGTCTTTCTTGTCTACTAGGATTATACAAGATCAT  
CAAGCAGCCCATGGACATGGGCACCATCAAGAAGCCTGCTGGAGAACAACACTACTACCGCAGCGCCAGTGCATGCAGG  
ACTTCAACACCATGTTCAACCACTGTACATCTACAACAAGGTATGGCCATAATATTTACATGTGTAGGTCAGGCTAATG  
CATCGATGACAACGGACCGAATGTTTATCACAAGTCTTTCCATAATTCACAGCAACTGTAGATGTACCGGTGTTAAT  
GGATGTTGATTTCAAAGTGCCTGTGGCTCTTCTCCCTCCAGCCACAGATGACATAGTGTGCTGATGGCCGAGCTG  
GAGAAGGTGTTCCGTCAGAAGGTGGCCAGATGCCCCAGGAGGAGATTGAGCAGCCCCCTCTGCCCCAGGGGCAAACC  
GGGCAAGCCTGGCAAAGGGGGCCGCAAGTCCAACGGTGTGACTTTGGAGAATGTGGTAGGGAAAAGAACGCAAGGGTA  
ATGTTCAACGAAGATTGGTGAATGTACTGTCTCGTTTTGGTTAAATATGAGTTGGAACAACCTTGTTTAACGAGTAGTGC  
ACTGTACATTTTTGGCCATCATATTTCTGGTAGTATTACCATTATGTGTGTGTTCTTGTGTATGATTTTTCTCTGTCCAT  
CTTTCAGCTTCGAAAGCTCACAGGTTCCCTGCGGTGTCCAGTCACTACTCCCCCTCTCTCTGACACGGGTGACTC  
AGACCCCCCTCAGACCATGCTGCCAAGAGTCTGCCCCACACAGCTGTTGAGCCTGCCCCACACTGCCACC  
CCAAGTATCAACCTTACTTCACTAAGCCTGAATGGAACACTGTATAGTACTGTACATTTGATTTGATGCTACACACT  
TGTGTGCTGCCTTCACTGTATATAGGCTACAGAACCCTCATTGATAAACAAGAAATACCATACTGTAACCTCTCTCTCT  
GTGCAGAAGAAGGGAGTGAAGCGGAAGGGGACACCACCCTCCCATGATGACCATGCCCTGGCCGTAGGAGG  
GGGTGCGATTGTGGGCTGGGGAAAGGAGGCCACGGCAAGGCTGAGCCACGACCCCTCCAACCTCTCCCTCACCTCCC  
TGGGGGACATGGACCCCCCTCCAGCCTGGTTAGAGGACCATGGGCCAGGAGGCCCGTTCTGTCCAGCCCATGATG  
GCCGGAGGCGGAAAACCTTGGCTGGCGCGGGGCGAGTGGACGCCCATCAAGCCCCCAAAAAGGATCTGCCGACTC  
TGTGACGCCCAAGGCCCGCGGGCCAAAGTTGAGCAACAGCTGCGTTACTGTAAACAGTGTAAAGGATCTGCTGT  
CCAAGAAAACCGCGCCTACGCCTGGCCCTTCTACAAGCCGTGGACGCCCTCGGCCCTGGGCCTGCACGACTACCACGAC  
ATCATCAAGTGCCCATGGACCTCAGCAACATCAAGGTGAGCTTGAAGATAGAGATGTCGCACTGCCTTGACTCAATGA  
GAACTGAATATGGTCAAATACACAGTTCATAGATTACCTCATATCTTCTCAGATTTGTTTTGCGTGGATATCTGTGACA  
GTATGAAACCAGGGAGGCTTATCCCTATCTGGAGTCTCTCCGTTATCTGTTGGAGTTAAAACAGTCTTTTTCTCTCC  
TATCTTCTCTCAGAGGAGGATGGACAGTCCGGAGTACCGGATTCGCAGCAGTTTTCCGCTGACGTCGGACTCATGTT  
TCCAACTGCTACAATAACAACCCCCGACCATGAGTGTAGTGGGCTAGGCCGCAAGCTGCAGTGCAGTCCGTTCCGTC  
ACCACAACTCAACCTGGAACCTTAGTTCACCTTTGTTGCCAGACCTTATGTCCACTGCATGCTCAGTGGGTTTTACTT  
GCAATGACTGCGATATGTGGTGTCTTACCTACCGTGGCTGAACGCACTGACTGCAAGGCACTCTGGATAAGTCTACTTA  
ATGACTAATATGTCAATCGTTTTGGTCTCCATTTCTCTGTCTGTCTTCAACTTTGCTCTCGTTATAACTGTTATTA  
TTGTGTAACAAAACAAAAGGGACATGATACACAATGGAGTAAAAACAAGCTCTCACTCACTCCGTTTTGTCTGTCTGT  
CCATCCAGGATGTGTTGAGTTCGGCTTCGCAAGATGCCCCGACGAGCCCCCTCCAGCAGGCTCCTCCCAAGTCCCGTGGC  
ATGGCGCGGCGGATGGGCGCTCACGGCGGGGCTGACTCTCGTCTTCGTCGTCGTCCTCTCTCTCGTCGGCGAGCGA  
GCCAGCAGCGAGAGGAGAGCAGCCAGCTCGGACGCGGAGGAGCGAGCAGCACCCGCTGGCCGATTCACGAGCC  
AGGTGTGTACACAGTGAAGTCAACCCCCCCCCGTTACCGAACAACACTGCACCACACACACCTAACACGCTGTATACC  
ACACACCTAACAGGCTGCTTTTCTATCACATCACAAGCATAGACTGCATCAAGAGTTTAGACTTCTCTCAACACAGG  
TTTTTCTAATATTTGACAAATCCATGCTCGTATACATACTTTCACTCATTGGTGTACATGTTTATACTAGTACTCTGT  
CTGTGTTCAAACATGCATGTACATAAGCCTGCTATTTGCTGCATTTTCTCACTATTACTAAGGTAGGCTGTATTGTA  
AATAAGGATTTGTTACCAACTGACTTGCCTAGTTAAAAAAAACAAAAAATTTGGCGTATTCCTTACGACTAACCAT  
TAAGTGAAGTGTATTTGTCCAGTTGAACACTCCACCTCTGGTCTGCCCCCGGTGACAGCTCCGAGCCGTACACGAGCAG

CTGGCAGCCCTCTCCCAGGGCCCAATCGTCAAGAACAAGAAGAAGAGGGAGAAAGACAAGAAGGAGAAGAAGAAGAA  
GAAGAAGCCGGAGAAGCGAAGCCGAGGACGGCCAGCGCGGAGGTGAGGGGTGAGGACTGGGAGATGCCGACGGCCAAGC  
CGGTGTGGACTACGAAGACTAAATCCAGTAGCAGGAGCTCAGCTCCCGCTCCTCACAGGGCAAGAGGGCCCCGGCAAG  
AAGAAGGGCAGCAAGTAAGCACACACTGACCTCAAACACTGACCTTCTCTTTGCTTTTACTCAACTTTTCGATCTGTGAT  
CCATGTCTCTATTTCTCTACCTTGTCTGTTTTCCGCTCTCTCATTTTTGTAGACTTTTCACATTGCTTCTCTTTCCACCTT  
TTCTGTTTTCTCGCTTTGCTTTTTGAAAGTTTCTTACACCATTTTATACTTCCGCTCTTTTCATCACATTCCAATTTCCAA  
CTTTACCTGTTTGTCTCTCTAGAACTGCAGTGGGGTGCAGAGTACAGATTATTGTATGGGACCGTATATCAAGTTCAT  
TTTGATAAGAGATGAAAATGTAGTTAATTGAAGGTGATTTGTTGATGTAAAAATGTAAATGTACCGAAATGTAGGTTGTC  
ATTTATATTTTGGGTGGGGGTACGATAAAATGTGACAAAAAATGATAATTGGGTCCCCACAAGTTCGAGCGTGAAAAAA  
ATGTCCTCCCTGCTGAAAGGTTTGCCATACAACCTCTTTAGTACTACTCCACGGTCTTAACCCCCCTTTTTTTAGAAA  
CACCAGAAGTCCCAGGCTGCTACCATGCCTTACTAGCCCGCTACTTTCTCCATGCTGCCCACTACGACTCCGAGG  
AGGAGGAGGAGACGTCTCCATGTCTGACGACGAGAAGCGCCAGCTGAGCCTGGACATCAACAAGCTGCCCGGCGAAAAG  
CTGGGCCGCGTCTCCACATCATCCAGTCCCAGGAGCCTCGCTGCGGACACCAACCCCGAGGAGATCGAAATCGACTT  
TGAGACGCTCAAGCCGTGACGCTGCGGAGCTAGAGCGCTACGTATGACGTGCCGTAGGAAGAAGCCCCGTAAAGCCCT  
ATGGTGAGCGGGAACAGATAGCGATAGCTAATGCTAGCTTTGGTTAGCTAGTATGGTGTGAAAGGGAATGCATCATGTTG  
TCACTGAAGACACTTGCTAATGTTATGCTACAAAGAACTGATGCTACGAACTGGTGTGTGGTGATAAAATGCTATATGC  
TAGCGTCTGGTTGACTAATACCATAAAAAGAACCTCTTTACACTATGGAATGTTTTTATATGTATGTGTGGGCTGA  
GTATGTAACCTGTCTCTGTCTGCTAACAGTGAAGAAAGGGGGCCCCGCAAGTCCAGAGAAGAAGTGCACCTGGA  
GAAGAAGAGGGAGCTGGAGAGGAGGCTGCAGGATGTCAGCGGACAGCTCAACTCTGGCAAGAAACCCAGAAACCCAAGG  
GTGAGCACACAGACACGGGAGCTGCTTTTGCACATGTAGCATTTAGCATTGAGATAAATGCTAATCCTATTTCCACTT  
TGTCCTCTCTCGCAGCGGAGAAGCTCAGCGGCGTGAGCCCCATGCCAGCCCTCCCGCTCAGCGGACGAGCTCCAG  
CTCAGACTCTTCTCTCTCGTCACTCTCTCTCTGACACCAGTGAATCAGACTCGGGTTGATGAGACAGTGGGAGAG  
GGAGGGAACCCCGTAGAGCTCAGGGACATGCAGCAGCCCGAGCAAGGTCTCCTGGGACGGTCAAGGGAGGGAGAG  
AGTGCCTCCCTCGAAAGGCACCCAGCACAACACTCCAAGATGAATGATGGTGGGATTTGTATGATGCGAGGAGGAGGAT  
CGGTGAAGGTCACTAAGGATACTCAAGACCATAAACATAGAGTTCAGCCAGGTTTAAGAACAGCTGCCATGTTAGCGCT  
TTATCCTCAATGTTGGTAATGTAACAATATGAGAGCACCTCTGACCGTTCCTATGAAATGACCATTCCAGGATAATGTAT  
ATCCAAGTCTTTACTGTGTTGTAGTGTCAACAAATGCATATCTGCTTTCAGACATCTTCATAGGTTTTGAGACTATCAG  
AAATAAACAGCACAGCGGAGAAGCGTCTATCACTTAGCAACGGCTATGGAGGAGGAAGTGGCTCTCAGAACGTTCCAGACA  
GAAACCGCATCGGCCAACTCTTTGACTCTGCTCAAGACCCCAACACAAATGCCTTGTATCCCTTCATCTGTGTGT  
AAATACTGTACAATTTATCTACGTTTCTTTTATAAAGAAAGATTTTATGGGATCCCCAAGAGGGAGCTCGCGGAGT  
AGTGAAAGGATGCGAGATGTGCCAGCCCAATGTTTGACACTTCTTTGATGTGACTCATAGAAATGATAAGAAGTGAATGG  
GTATAAGCAGTATGGCAGAAACCCACTTGCCCTCCAGAAAGCTATGTGGAGTGAGTATGTAATGCTTACACTTATCT  
GTTCTTTCACAACGAGGACGTCACGTCAAGTGATGATTTTCACATCTGGTAGTTATGTCTTTTTTTTTGTCAAGTCTTA  
TAGCTGCAGTCACGAGTCACTACATTTTTGTTGCTGCTGTGTTTCATTTTACATCTGTTCTTACTGCTAACAGACCTAC  
ATTCAGCTGGACATAAAGTTCAGAGGCAGAAGGAGAGTTTTATTTCCATTCATATGTTACTCTTAAGAGATCTAACTAC  
TGAACCTGTTTCTTGACAGTGAGATTTGTCTACATGTACGGCACTTACCATTAAAGAAACAGCCCATGTGTCTATTTTC  
TCAGGAAAGGATGAGTCTTTTATGTTGACACTGCTGCTTACAATCACAGCAGTCTATAGAAACTGATTTGGTATTTAGT  
TCTAAGCAATTCGGTTAACTCTATGCTTAAAGGAAAATAACAATCAATCATTTGGTATTTGTTTTCGTTAGTCCACTGTTG  
ATGAAGTTCACAATGTTTTGCATGTGAGATATCAAGTTTTCAACAGAACTTTCAAATAACAGGAAGTGTACAGTGTGA  
TGCGTCTGCAAGTAACTGTTGGATGTTAAATCCTCATGTATACGGGAGTAGACGCTTAAGTGAAGTTTGACCACAG  
AGATACACCAGATGAGATGTACAGAAGCTAGGTTGTAGATATCTAAGGAAATTTGTGTGTGTGGGTGTATATATATATAT  
ATTACTGTATTTTCAAGTGGTCAAATGATCATGTTTCTTTCTACCAGTGTGCTTTTTTTTTCCCTGTCTGTCTTTCTTTTAT  
ACTGTATTTATCCTCTCTTAGTCATGCTTTATTCAGAACATGCTTGAATGTTGTTTTGCATCTGGTTGACTAGATT  
GCTGCCCTCAGGAGCATGCCACTCATTTGAAAACGTATATATAAATGAGACCTCTTCTATAAAGCCTTTTATTTCT  
TTGTGATAATGTATACGCAGTACACCCCTATTTATTTATACAGTGCCTATGGAAAGTATTCCGACCCTTGACCTTTTACA  
CATTTTCTTACAGTACAGCCTTATTTCTAAAATGATGAGGGAAAACAACAATTTAATCAATCTACACACAATACCCCAT  
AATGACAAAGCGGTTTTTAGAAATGTTTGCCAATTTATAAATGAAAGAAAAAAAAATCACATTTACATAAATATTCAG  
ATCCTTTACTCAGTACTTTGTTGAAGCACCTTTGGCAGCAATTACAGCCTCAAGTCTTCTTGGGTATGACGCTACAAGCT  
TTGCACACCTGATTTTGGGGAGTTTTCTCTATTTCTGCAGATCTCTAAAACCTGTGCAAGTTAGATGGGGAACATTGC  
TGCACAGCTATTTTCAAGTCTCCCCAGAGATGTTTTGATCGGGTTCAAGTCCAGACTCTGGCTGGGCCACTGAGGACATT  
CAGAGACTTGTCCCGAAGCCACTCTGCAATGCTTTGGCTGTGTGCATAGCGACGTTGGCCTGTTGGAAGGTGAACCTTC  
GACCCTAGTCTGAAGTCTGAGAGCTCTGGAGCAGGTTTTTCATCAAGGAACCTCTGTACTTTGATCTGTTTGTGTCAA  
GGAATTTTTCTATCCCAATGATAATTAACAATCAATAAGCCTTGACTAATTTCCAAGGTTTGTAAGACAATGGGTTAATA  
ATTAGCAAGGACTCAGCTTTCTGCAAAAGGTTGCTACAGTTTATTCAGAGAACGTTCTGCCCAACATTAACAAAGAATT  
TCATTTTATCCTCTCTCCGCTTACGCACACACCTCCATAGCAACAGTAGATAACCTACGCACACACATACACAAACAG  
TAGGTGAACAGTATGCCCTCCCTGACTTCCCACCAGTTAATCACTATCCAGCGCTGCCGTGTTCCCTTTCCCGGAGATT  
AGGGGATCTTGAAGCTACTCCTGGTCTCTACACACACATTTCTCTCTCTCCGGGTCTCTACTAGACCTTATGGAAC  
ATCGTTCACTACTTTAATCATTCATTACCCATGCTACATAACTACTAATTAATCATGGATTATTGATTCATTTACCTTTA  
TTAGATAATTTCTTATCAGTTTGTCTTTGCCTCAATCCTGACTAGTCTGCCATTCCTGTGCTGAAAAACATCCCCAC  
AGCATGATGCTTTACCGTAGGGAGGTTGCCATGTTTCTCCAGACTTGCACACTGGCATTCAGGCCAAAGAATTCAATAT  
TGGTTTCATCAGACCAGAGAATCTGGTTTCTTATGGTCTGAGAGTCTTTAGATGCCTTTTTGGAAAACCTCAAGTGGGCTG  
TCATGTACAGTTGAAGTCGGAAGTTTACATAACACTTAGTTGGAGTCAATAAAACCTCATTTTTCAACCCTCCCAAAT  
TCTTGTTAACAATCTATAGTTTTTGGCAAGTCCGTTAGGACACTACTTTTGTGCATGACACAAGGAATTTCTAACAAT  
GTTTACAGACAGATTTTACTTTAATTTACTGTATCAAAATCCAGTGGGTGAGAAGTTTACATAACACTAAGTTGAC  
TGTGCTTTAAACAGCTTGGACAATTCAGAAAATGATGTTTAAACGATTTTACTGAGTTAGAGTTACATAAGGGAGTCA  
GTCAATTTGAAATAAATTAGGCCCTAACCTATGGATTTACTGGGAATACAGATATGCATCTGTTAGTATGGGTGAGAAA  
CCAGTCCGATCTGTGTCCACCATTGCTCATGCTGTGCGTTTTTCAAGCTGTTGATCGTGGTCTGTTGTCCCACTCCT  
CTTCAATGGCTGTGCCAAGTTGCTGGATATTGGCGGGAAGTGGTACACGCTGTGCTACACGCTGATCGAGAGCATCCCA  
ACATGCTCAACGGGTGACATCTGGTGAGTATGCAGGCCATGGAAGAACTGGGACATTTCCAGCTTCCAGGAATTATGCAG

AACCTTGCGGCATGGGGCTAGGCATTATCATGCTGAAACATGAGGTGATGGCGTTGGATGAATGGCAGGACAAAGGGCCT  
CGGGATCTCGTCGGGATCTCTATCAGTGGAGGCTGCTGAGGGGGAAACGGCTCATAACAATGGGGCGAACTGTGAAAA  
TGGAAATGGCATCAACACCACTGGAACCGTGAATTTGATGTATTTGATACCATTCCACTGATTCCGCTCTAGTCATTACCA  
CAAGCATGTTCTCCCAATGAAGGTGCCACCAACCTCTGTGCTGTGCATTCAAATTCGTAGCAATAAAATGCAATTTGT  
GTTTGTATCCGTAGCTTATGCCTGCCATACCCTAACCCACTGCCACCATGGGGCACTCTGTTACACAACAACAAACCG  
CTCGACCACAGGACGCCATACATGCTGTCTGCCTGGTACAGTTTAACCTGGGATTAATCCGTGAAGAAGACTTCTCCA  
GCATGACAGTGGCCTTCAAAGGTGAGCATTACCCACTGAAGTCGGTGACGACGCCAACTGCAGTCAGGTCAAGACCCT  
GGTGAGGACAACGAGCACGCAGATGAGCTCCCTGAAGGTTTCTGACAGTTTGTGACAGATTACTTTGGTGTGCAAACC  
CACAGTTTCATCAATGTCCAGGTGGCTGGTCTCAGACGATCCCGCGGGTGAAGAAGCCAGATGTGGAGGTCTGGGGCTGG  
CGTGTTACCCTGGTCTGCGGTTGTGAGGCGGGTGGACGTACAGTATAACTAAGGGCAGACTAATGATCATGACTC  
CATAGTAGGTGGCAGAGTCAAGATGTTGGCTATGTCAGGGCTATACTGATCATTCAAGATAGAAATGTTTGTGTAGAATA  
GGGAGTCATGTCTCAGATCTATTTATGCGTTTCTATCTGCAAAGTTCATGATGTTTACCTTTGATACACGCTAGTTGT  
GTGTAAGGTGTGCCATGCATACTCAGAATGCCTAACGTGTTCTATGTAGTAACCATAGATATGGTAATAAACAGTGTCAAT  
CCAGATTAAAGATTTGATTGGCTGATGATATTGAGGAAGTCACTGCACCTTTCAGCAGGACTGTTTGGAGTACAACACT  
AGAATCGGAACAAAACATTGGTACATTACTGATGAGCCTCACTGGACAAGTGTACTTAGAATGGGGTGACAGTGTTC  
TGGCTTAAATACGGTGTGTTGCTACTGTACACTGCCAAAGTAAGTCCACTTTCATCATGAGAGACAGGA  
ATGTGATTAGAGGAAGGAAGGAGCAGACTGGGCATTATTTGCTTGCAAGAATCACTTTCAGCAGTCAACCACACTG  
TGTCCAGTATTCTATTCGTAACCTCATAGATGCAGACGACTTTCATCATGATTCCCATTTATTAATAAAACAACATT  
TACTGAAAGGCGTAACCAAAATTAATTAATTGATTTCAACTACTCTCGTACCAGAGGTCAAGATTTGTCATGTTTGTGCT  
TTTCCATCTCAACTTGTGTTACTGAACACAGGCAAACATTTGCTGCGGTTTTTGACCTTCTGCCAAAAAAACATCACTCA  
TACAAAGAGTATGACGTAGAGTTTTGAGGATGAGCTCTTCTACGTTGACCCCATGACCTACCGGGTAGAGCGGGACTGTC  
AGCGTTGCGCCAGCAGTGGACCCGTTGACCCAGGACTGCCTCAGCAAGTGAACGTGTCCCTCGGAACCTGCCAGTACAATA  
TCCCTGCTGCATTTGGGAGAAATTTGGGGCGCGAGTACGCTTAGTGGTGTAGAGCGTTGGGCCGTGAATGAAAGGT  
TGCAAGATTGAATCCCGAGCTGGCAAGGTATGAATCTGCCCTGAAACAAGACACTTAAACCCTGTTTCTAGGCCGTCA  
TTGTAATAAGAATTTTTTCTTAACTGACTTGCCTAGTTAAAATAAGGTTTACCTTAAAAAATAAGGTTTATAGAGTCA  
CACCGGAGGCATTAGGTGAGTGTCTGTTCTGTAAAGTCAACCCAGCTAGCACATCATATCTGTTTCTTAGAGCTTGG  
TGAGAGTGTGGTTGTCTATGGTTATTTGTCATATAACCTTACCACAACGTTCTGGGAATGGTGCAGGTTAGTTGCTTGG  
CTTTGGAACATTCTCAGCACATTTAAGGAACCTTGCAGAAAGTGGTTTTGATATTGGGAATGTTCTCAAATAGTTCAAGAGA  
GTTAAAGAAACAACATCTTCTGTGTGAATTTCACTACTCAGCATAACGTTTCTCTCATGGTCTATTTAAAGTCAATGTT  
TCAAAGTTTCAAGACTGTTTACAAAAACGTTTCCATAAAAAACCAAGAAAAATGTTTGTAAACGTTTCAATAATGTTATTTAA  
AAGCATATACATTCGTTTCTCAGCGTCAATAAAAGGCTCTATCTCCATCTTAAAGTGTGTTTCAAGTTTGGCCGTTGCC  
CATTAATTTGGCCACCCCTGATCTTAAATGAGTGTCTTCTTCTTGAAGTGGGATCTGTTTGAATAGACTAAAATGAACAG  
CTTTGTATGCCTTAAAATCTAGTTCCACCCTGGTGGCGAAGTGGACTACGGTGTCTTGTACAGCAAATGGTTTTGGTAT  
GTTTTTTTATGAACCTCGGTGCATTTAGCCCTTAGTTCAAGTTCGTTTGGACTGGTGTGAACACTGTCTCACTCGGGAG  
CGCCAACAGAGGCTCCACCTCCACATATACTCCAGAGAGAGGTGGAACCTGGGGGACCCCAACACTCATCTGCCG  
GGTCAAGTATTCCACCAACATCCGTGGATGTGACTTGGACAGCAACGAGCAGCCGTTGGGAGAGGGGACCGTCACT  
TGACCCAGTACTTCAATCAAAAACCTCAGCTTCAGATCTTCTTCTTACCTGAGCATCACACCTCAGGAGGGGACATC  
TACTCTGTAGTGTGGGGCAGCTCAGCCTGCAGGAACCCCTCACAGGATCTGGGGTGTACTGCTGGTGTGACCTTAA  
TACTGTAGGATATGACACAGAGAAAGGTGGGATGTTGTTTACTACTGCATTAGGGACTAACACATCAATGTTTCTTCA  
CTATAATGTTCCACAGAGGTTGAAGTGACACAGGACCAGACTGTGGAGACAGCAGTGTGTGTGGAGGTGTGACTCT  
AGGAGTGGTGGGAGTAGCAACAGGAAGCCAGAGGTCTGGTTGGGCCTTAAGAATAGGCAACTATCAGCAATACACCA  
AGGGCTCCATGCAACAATACCAAGTACAATATCATATTCGCAACCTCAACTGTGCTGGCGACAATATGATGCAGTTC  
ACTATGTGAGGGCAATTTCTGTAAACCTTACTAATGTCTGTGTACTAAAATATGCTTTAAGCTTAGGCATTGGGCTT  
GGCTGGACTTCTGTCAATCACACCTGGGAAACCCAGAGTGTGACTTCAATCCAATTTTTTTGATGAAATGCATGATGT  
GTCTAATATATATGAAGAATGTATCAAATGAAGTTGACAGATCTTTTGTAAACAATACAGTATAACAACCTCCACAAAGGC  
AATGATTAGGAGATTTTCTTAAATGGATCCATGTTGTAAGCAACAACATATTTTTTGTAGATTACCTCTTTGCACAATGA  
CATGAAAGGGATACAGCAGTACAAATTAATATTTGTTTCAAGTGGTACCAGTTCAGGGGATAGTTGACTGTGAATA  
TGACACCATTGACAAATATGATCTACTTTGTGAAAAACATATCAACCAAAAATGACCATCTATGGCGCCAGGGTTTCA  
AGTATATGGGTTTGGGGAGTATGGCATAAGCAATGACATCACTACAACAGCCAGCTTGGAAAATGGCTATAAGGAAG  
GCATAAGTGGAGACTTATTTGCCATACAGTGAAGATCTTCAAACCTGAGCAGCTTTGGAAAAGAAATAGGTAAGTAAATTT  
ACGTTTCTTTCTTATTAATTTGCACGCTGTGTACTTAAAGTCAAGTTTGTATAAAATATTTGTTTTGCAAAAATGTTGCTG  
TTTCCGGTCTGTGGACCTCCATCAGACAACCTAATTTCTACGTCATCTTATGTCAGTGCCTCCACTGTCAAAGTCTGC  
CTGACCAAGACCTCTCGCTACGGAGAGCTGTCCATGCTGGAGTGGATTAGAGAGAGATATCTCTGCTTATAGCAGTGT  
TTTTTAAATAAATGTCAATAGATTTTGAAGTTACTGGATTGGTAGCAGCTTTGTGGTAGTGTGATTTTTACATAATTCC  
ATTTCCAGATACCTCAGGCCTGCATACTAAATGGTTTAAATGGCAATAGGGGTGTGTCCCTTTTCAATGGTGTAGCCA  
TGGCTATTGGAGGAGTTTACTACTGGTGGAAAGAACAGGAAGTCAACAACATCACACAATGGACAGAGATTTTATGTAAC  
ATAAATCTATTGGATATTTTTGATTTCAGAGGTTTCAATAATGTAGACATATTTTACTGTTTCAGGTCAAGCTTATAGC  
GTGTGAATAGATAAGGTAAAGCATTTTTCCATATTTGTGTTTACATATTTTGAATAAAATAAACATGTCTGATATATATA  
CTGCTGGAATCTTTACATTCCATACATCAAAGCAGAGAATTGCATAGACAATCCTTGTGCACCCAAATGTCACATTTGAA  
CTTTTTTTCTTCTTTCCAGTAGGTCAATTGACTGCTTCGATATGATGGCATAAGAGCGAAGCTTTTCTTTGCCAAAA  
TGCCACTGCTTAAACAAAGCAGAAAATAACTTTTCAATCTTTACCATACTATTCAAATTTGTGTCCATATGATGGAATCAGN  
NNNNNNNNNNNNNNNNNNNNNNNNNNNNNNNNNNNNNNNNNNNNNNNNNNNNNNNNNNNNNNNNNNNNNNNNNNNNNNNN  
NNNNNNNNNNNNNNNNNNNNNNNNNNNNNNNNNNNNNNNNNNNNNNNNNNNNNNNNNNNNNNNNNNNNNNNNNNNNNNNN  
AATTAATTCATCCACTCGGTGTCCAGGTCTAAATCAAGTCTCTGTTTGAAGAGGGGAACGATGGAAAAAAGCAATGGGGC  
TGGCTACGAGGTCTAGAGTTCAGTTTGGGGTATGACAGAACCACTAGATGAAACCAGTAAAAATAACAGTATACAC  
AATGTAGATGAACAGAAATTAATGAAGTGTGCTTGAATGTCCTTACAGTTTGCATTAATCAATTAACCTTTATGG  
CCCTTGGGCACAAAATGATATTCCTTAAATTAACCTTGGCGTATCATTATATAAATAATTTAGTCTGATTAATTTCCATC  
TTAGAACAAGATTACCAAAATTTCTCCAGACATTCAGTATGCCACATTCAGCAGTTTTTATCCAAACCAACATCAGTTCA  
GGTCTTAGTGGTAAACCCATGGGCCACAGCGCTTTAGGCCATAAGTACAGTTGTTCAATACTACACTGCAGGCTGGAA





CTGTTCTGCGGGATAATTAATTGCATCCACCCTGGTGTCCAGGTCATAATCAGTTCCTGGTAAGAGGGGAACGATGGAAA  
AAAAGCAATGGGGCTGGCTACGAGGTCAGAGTTACGTTTGGAGGGTATGACAGAACCACTAGATGAAAACGATGAAAA  
ATAACAGTATACACAACTAGTAGAACAGAAATATTAAGTGATCGGTTGAATGTCTTTACAGTTGTCATTAATCA  
ATTAACCTTTATGGCCCTCTGGGCACAAAATGATATTCCTTTAATTAACCTTGGCGTATCATTATATAAAATATTTAGTCT  
GATAAATCCCATCTTAGAACAAAGATTACCAAAATTCAGACATTAGTATGCCACATTCAGCAGTTTTATCCCAAC  
CAAACATCAGTTCAGGTCCTAGTGGTAAACCCCATGGGCCACAGCGCTTTAGGCCATAAGTACAGTTGTTCAATACTACA  
ACTGCAGGCTGGAAATGAGGATTTTTGACACGCTCTAGTGGTCCACCTCGTCCCTTGGTCATTTAAGATCTAATAATGC  
TTCTGTAGTGGACAACATGGATATGATGTGGTTTTCATAGCCCTCCTATAATGACCCGTCTCCACAGGGCTCCTAGC  
TCTCATGATGTATAGATCACCCCTGACTGTGAAACTACGTAATACGCTTGTTTTCACAAGCACCATTACCATGAGTTGT  
GAACACATGGGGCCCAGTAATGTATTTTAATACAGCAGCATAATGCATATACATCTGATCAACTGTGACCCTTCATGG  
TACTGAAAATGTAATAAGTAGATACGACAGATTTTAAACAATAGTTATGTTTCGGGGTTTTTTACCCTTGTGCCCCCTA  
AGAAAATTACATTGTCTGTAAGCGCATAGCTATAGCACTCAGGTCCAGCCTGATCCAACAATGGAGAGTCTTTATACTGT  
AGACTGTGAGGGACTGAAGCTTTTCTGAATTTACCTCTTACATTCCTTTGACACTCCAAGGCCAACCTACAAGAGCCCTT  
CACTCGGGTCCGATTCGACCCGAGTTAAGCTCGTGAATGGAATGTAATTCCTTTTATGCACCTTCTCTCTACG  
GGTATTTCTGACCTTGAACCTTGAGAAATGATGCTATTTCAACCCGCTGTTGGGTGGGGATTAATAAAATGAAGGTGTGGTGG  
TGTGTCTACAGATATGCGGTATTTCAACTCGACTTAAATCCCTCATAATACACCATCTTTACACATGATGAAACAATG  
AATAAGGTCAAGCAACCTGTCGGTTCCAAGTGGAACAACATCTACTTTATTTTCCCCTGATAGAAATAACACCATTCT  
TCCATTTCACTGTAATTTACAAATTTGATAAGAGTAGTAAATGAGTAAAGCCGTTTGGATAAGGGGATTTAAATAAAAT  
GACAATCGTTTTCTAACCCCTAAATAATACACAAGATCAGAGTTTTTTTTAAATCGACCAACTGGTGGTGGAAAGGAGATA  
TATGTGTGTATTAAGATGTTTCTTTTCAATAATCCCCATTTGAAACCAATCTCTCAATTACACTGAGTGTACAAAACATT  
AGGAACACCTGCTTTTTCCATGACAGACTGACCAGCTGAATCCAGGTGCACCGGTTTGGTGTGACAAGAACTGCAACGC  
TGCTGGATTTTTTCTATGCTCAAATGTTTTCTGTGTGTATCAAGAAATGGTCAAGCTAACTTGACACAACCTGTGGGAAGCAT  
GGAGTCAACATGGGCCAGCATCCCTGTGGAACACTTGACACCCTGTAGAGTCCATGCCCTGATGAATGAAAGTGTTCCTG  
AGGGTAAAAAGAGGTGCAACTCAATATTTAGGAAGGTGTCCACACTCTTTGACACACTGATGCTGTGAGTAAATTTG  
AATTAAGGTACACCATATTTAATGGGATGGCTTTAGATAAATGTACGGAAACCCCTTTGAATGAAAACCTCCACGTGAA  
AATCTGTTGGCCAACAAGTGGGAGGGTTTTGACGAGTTGAATTAACATTTTATTCAGTGCCTGCAAGGTAGCCACACCTGCA  
AAGCTGTATACACACTGCATACGGTAAGTATGAATACCAACTACCGAGAAGTGCACAAAAATCAAAAAAATAATCGAT  
TTTTCTGAGTCTGAATCGGGCCCTTAGAGCTGAACCTGAACAAAACATGTCTCAGCTTGTTTTTCTCACTGGCCAAATGTC  
TGTTTTAACCACCATGTGGTTCTAAGACATTTGAAAGTTGACATAAAGCTTTTACAAGAGACTGAAAAATGAAAGACCA  
CTGATGAGTGAATGTGTAGTGTGGTAATGATTTGACTTTAGGAAATGACCCCAACATGGCAAAATGCATTTGGTTTT  
AGAAATTTCCCTAGAAAACATAAAAACCCACAGGTGCAACTTAAATATAAATAATTTTTATAATATAAATAATTTGTACAGT  
GAACAGTAGGGATGTGGACATTTCCATGAAAAGCGAATACAAAGAATACCTTTGTTTTTACAAGACTGCAGTGCCTGAC  
GGTAGCCGATGACCAAGACACTCAACATTCAAAATGGCAGCGCAGGTGATGAAAACAGTTACATCGGAGATGAAACCTA  
ACAATACAATTCAGAGGCCACGAGCAAGCTAAAGTACAATAAAGAGATTGCCCTCTACTGTATCATGTTTCTGTCT  
ATTTCTAATCTGTCCATTTCAACATAAATACACACAGAAATGAACCCCTGGAACACACATTTTGCACAGCATTTATCAAGA  
CAATTTGCACCTGCCACTGACTGTGTAGCTTTAGACAATAATGTTGTTTACATAAAGACAGGAAATAGTAGATTACCTTTTCC  
ATGAGTGGGTTGGAGCCGCTGTTTTAGACAAGGCTGAGTTAGTTAGTACACAGGATGAGGGATCGTCAAGGAAGGATAA  
GTAACAACATTCAGCATCATTAACTGATGAAGTGCCAGATCCTGCTTCACTTTCTCCTCATATCCTTGTTTTTTCAGTA  
TCAGGAAAAATTTTTGTCTACCCACTCTCCCAGGGACTACTTAGGGCAAAGCTGAGCAAATGCACAATCACAAATCATCT  
CTTATACAGAGAGATGAGGGCATGGAGTTACAGCCCCCAGGTAACACAACCGGATACAGGACCTGGTGTCAATTTGACC  
CAACTCTGTGGAGGTTACAGTTGTCCATGTTAATGGTGTCTTCCAGAAATGCTGTAGGTTGTTAAAAACAATGATGTA  
GAATGAGATCACCTGATAGTTCCCTGGCTGATTTTTCCACATTTTCTACCATAACTTGATGTACATTTGACTTGAACAG  
GCAGTATTTCTACTGTGTAAAATAATATACAAAGGAGCAAGGCTCACAGATATATAAAAAAAGACTCATATTTGGTATG  
AACACAGAACCTTATGAACACATAAATAACAATGTATGAATAAGCAAATATGACAGTCTCATGATCTTATACCGGGC  
AAAAAAGCGATTTGTTTTAATCTAAAGAGAAAGAATGACTTGATAAGAAGCCAATGGGGAAAAATGTCTCAGGTTCCAGA  
TAATCTTTTCAATTTATCACAGAGGGGTGTTTTAGATTTATATTTCTTACTCATATTCGTCTTAGCCACACAAAATATTA  
ACTGACAAGTCATTTCTATTTCTCTCAAGCTGTGACCACAAAAGCTAAAATAAACATGTGAATACAACAAGTGTCTTAT  
TAAAGCTCATAATCGCCTAAAGCGAAGTGTGCTGGAAAGAAACAATACCACAGATAAATATACAAAAAAAAGAAAAAT  
GATCCTGACTTTTATCAAACTGTCTATTTGACATGTGGGCACCACTCTTCTACTTGAAACAAGTACAGCTGTGGAAT  
TCCATCAACATAGTTTCAACATAAACCCCTGACCACCTTTGGCCATTGTAATGACTCAGCCCACAGCATGGACATATG  
GTGAAAAAGGTTGCCAATGACGACTCCATAGCTACAAATCCCCAATATGCCAAGGAGGTTAGCTAGCTCCAGTATGAGCG  
TTTTGAAAGCACACTTCACTAGCTTACAGCAGACAGAAATACACTGAGCCTAACTTCAAATCAAAAACAGAAACTTACCCT  
TTAAATCAACAACACTGTAAAGCCAAATTCCTTACTCCCGTTCAAATCTAAAACAGAAAACACTGAACTTACCTTCA  
AACACTGATTGTAGCAACCTCTCAGGCTATAACACTGAAACCAACTCAAACCTTCTGACATTTGTACTTGAACATTTAG  
GCCAGTATCAATAAAGGCTATCCCTGGTCAAGTTTGGAAATCTATTTCTATACAATACATCTGCCATTGAGATAAACAT  
TTCAGAACAGTGGTTATTTAGAAAAAATACCACATCTACAAAACCGGCAAGCCTATATTCATCTGTAACACATACAGGT  
TCTTACAGACTTTTCTTAGCAACTGCAGTACAAGAAAAATCCATCCCTATGAAAAATCAAAATCCAGATGAAGTGTATTT  
GTTATTTTTGAGGTTGAGGTTTTCCACCGTCAATAGCCACATAAGTGACCCCATTTATAAATGTATGACTTGAAGTACAC  
CCCACTGACAAAGTCCATTAGCCGGTTAATGATTTCTCCACACAGCATCGATGCAGCACCCTTTAAAAATGAAAAGCAAC  
ATGATACCTTGAAGACTACATTATGATTTTGGTATGGTCTGAAATGACACCCTCAAGAGGGGCTTTAAAAGCTTGAAGT  
GAAACTATAAGCAAAGTCAATGGAAAAATGGCAATTCGAACACCCTATTCCAAATTTGCTCAATATTTTTTTTTTACTTCT  
TTCTATGCTCCGTTCTATCTTGAACACCCAGTCAAGGCAAGCCATAACCTTGGCCCTCATACTTTGCCAAGTACTTTTT  
AATGACCATGATTGGAAGAGCTATTAATACTAAACCTGTGTAACTCTCAAAGTTGACTCAACATTTCCATGTTGGTT  
CTCATCACTTTCACTTCCACTCAACCCACACACATTCAAATGGAGATTTACTCCATTTACAAAACCTTTGACTTGGCTTGG  
ATATTGACACATTCAGAATGCAAGGCGAATGCGTCACTACTATAAAGAATCAGAGTGATTATCAGCATCATCTGTAGT  
ACTTTACATTTATGTCTAAAAGTAAATCAAGTTCCATTCACTTGCATTTGGATTGCCTGTGCAACAGCCACTACATTTCC  
CCACAGTGCTCCTCATCTAAACCCATGTGACATACAGTACTGTACCCTATGGTACTGTACAAATAAGGACAAGCGAGT  
TTGGCTGGTTAAAGTCTGTGTTTTCTCAGACCCAAGGCCATTTGGTCCCATCAATTTGTCCATTATATCCAGTGACTCTC  
GTACATTAGTATCTCCGATCATTCTCAGTTATGTACGTTCACTACGTGTTAGGATAGGATCAGTCTGAGGCTGTGAGA

GAGACTGTTGTGTGTCATCTGTGGTAGAGATGTGTCCATTGTGGAGAGCTGTCTGCTGCAGAGGATAGAGTGATTACAT
GGTAGGAGGATGTTGCAGTAATTTAGGCTGTTCCAGGGGTAATGGTGAACCCCTATCTTAGGTTATGATGTTTCGTAGG
TACATGATGATGGTAGGGAACCCCTAGGTGTGATGCTGTGTGGTCTGAAGAGGTTACACACTGCACCTAAATGTTTCAATC
TTCTTCGGGGCATTGATTTGGTCAATFAGAAAGAAACCATCCTTTACTGCCTTTTTGCACCTCCTGCACAAAATGTTTCAATC
CTGGTCAGGTGGGTCTTGTTGCACGTCAACATTTCTCAGTTTCTCCATTCTCTTCCCTCCATTTGTCTCTTCTTTAGTCT
CAACCCCAATTTTCCCTCACTTCCATTTTCAGCTCCCTCCCCTTTCTCCCTTTCTGCCCCTTGCTCTTTGGTCTCCACCTCC
ACCTCTGAACCCTTGTTAGTTTCGGTTTCATCATCAACTGCCACCCCATCTCTTTTCTTCCACGGTCTCCCTCTCTCC
ATCTCTTTCCTCCTCAGTCTCTGCCCCCGTCTTCTCTCCCTCCTGCACTCTCCCTCCTTTGTCGCTCTTGTGATCTGTTC
CTGCACTCCAACTCTCTCTCCCTCCAGTTTCTACCCCGCTTTCTACCCTCTCTCAGTTTCTGCCTCAACTTTTTCTCT
TCCTCCACCTCAAGGGAGCTCACCTCTTTACACACAGTCTCTACCCTCCGCTTTTCACTTTTCTCTTTTGGTCTTCC
CTTGTCTTCCTTTCAGTTCCTCTCCCTTTGAGCACCTTTTCCCAATCGTCAAGAATCTTGAATCTTCCAGATCTTTCT
CTGCTGCCGATTGCTTGTCTTTCTCTCTTCTTGTCTTTTGACGCATCTTTAACAGAGTTCTTGTGGACTTGCTTTTG
AATATCAGTTTCTGAAAGACAGGATGTTTGTGTAAGAACGTTTCTCTAACTGCTGTCTATTGGCCATGTTAAGGATGG
ACAGACAGACCGTTGAAATTGACATAATAGCAAACCTGGAAAGAACAATAAAAATGATTTATTGTGGGAATGAA
TTGTAATTTCAAGGAATTGATTGGTGCCTTCAGGGGTACAGACCAAACAAGAAAATATGGCTGGTAATAATTTATGAGAT
TGCTCATTGACCTCTTTTAGCTGAGACTTACAGTATACTGAGGTAACAGCATGTTACCTGCACACAAACATTCA
TTATCATTCTCAGTCTCTGCCAGGTATTGCCATCAGTTTGGTGGCAATGGTGACAGAGTTTAAATTCAGT
CACAGACAATAATCAGCATAGATTTCCACAAAGGACAAAGGTCAAATCTAGAGGTTATATCAGTACAACTTAGGATCA
AATGGAAAGTTATTTCTCAACATGCATTGCCGTGGTTACACAGAATGGTTCATATCTCAGGAAGAAAGGGGTTTCATTC
CAATTTGACCGGCAGTGTGCATATTTATCTATGTGAAAACAAAAGAAGTGTGCGATGGTGAGGGGTGATGTTGGCCTTGG
AGCGTTCTCTGGCTAGTGAACAAGCTGCGAGTCCACCATGTGCCAAGACAAACACGGGGAGGAATGAGAGGTCACA
CACCTTGATTCCCTCTTACGGGGAAGGACAGGTTCTGAAGAAAAGGACCTGCTTGGTGCCAACTTCCATCAC
TAGGCGAGGGGAGAGATAGGGAGACGGAGAGATAACAGGACAGGGAGAGATGGGGAGACGGAGAGATAACAGGCNNNN
NNNNNNNNNNNNNNNNNNNNNNNNNNNNNNNNNNNNNNNNNNNNNNNNNNNNNNNNNNNNNNNNNNNNNNNNNNNNNNNN
GCTCAGACACCAAGAGAAGACCATGTTTACTGGTCTCCCAGAACATGGCTGTCTCATAAACTCCCCAAATAAT
CCCTGTCCATGTACATGTCACTCTGTGTTCATTTATGGATAATCCATACAGTACAGATGACAGACAGACAATCCACC
GAGGAGATTCTGTCTCAGTGGGCTTCCTGTCTCTCGTGCTTCTCTCCTGTTCGTCTCTCTCTTCCATCTCAC
ATCAATAACGTTCCCTCTGCTTCTCTCCTTCATCTTTCCATCCGATATGCACGTATCGACTCCGTTTCTTACTTTAGCCT
GCTGTCTCTAACTATCTGTCTCCTTCACTTTACTTTCTGTCTTCTCTTCTTTCTTCTGAGCTTTCATGTAGGCTTTCTC
TATCTTTTCCCTTTTCCCTTCTCTCTTTTGTATATCCCCTGATCTCCCTCTCCAGATCGCTCTCTGTCTCCTTCTC
TCGAAATCTCTCATCCGTTAAACATATGTACTTTATACACCGGGGAAAGAACAGCTTTGAGTTAGCTGGAGCCTTA
ACTTGGCATATGAAAGAACACCGGAAATGTATGATAGGGGTGACAACGGTATAGCGCTGGCTGCAAAATCTTCCCACCAAT
CAAATGGGCTTCCAGATCTCCTGTAGAGGCTTACTATCTAAACCACCCCCCATTTCCCATCCCTCTCTCTTACCCTGCC
TTTCCAACAACCTATTTTCCAGGCTGTCATATCGCCGGACAGCTTCTGCTGAATGAAAGCGGAAAAGCCAACCGGAGTC
CTAAGAAAAGCCCAAGCCCATTAAGTAGAACGGAGCGGATGAGTTTAAAAATTACAGGCCCCCTTGTGCTACAGTCCCT
CTCATAGCTGTCTAGTGTCTGCAATTTGGAACAGAACTTCTTATACCAGCAACAAGACTTTCTTTGGTACAGTGGTAGG
GAACCTGGTGTATTTAGTTAGTGGTTACCTGTGGTGTGTACATCAGCTTTATTTCATGTTTTCTGTGAGTCATTTCTT
ACAACGGTATAATGAAGCACTTACTTATTTACTAAAACAGTTACGATGTCCAAACATCAGATTTACACCAAATAACAT
GTTTCATGTGGCAGAAATATACTGTACATTAACAGCTGCACCTTCCATGTTACGTTGAGTTAGTAAAGAACCTTGGAGT
CCCAGTGATGTTCACTTTAGATGCTAAGTAGTGTGTACGTAGGCTATGCAGATCAGACTCCATGTAGTCTCCATTGGA
AGAAGTGAATTTGCTCATCCTCAGACAGTATCCCAACGTGCATTAGCTTTAATATAGTTGTAAAAATGGAAGAGTCAAC
ATAATACAAGTGTAAATGAACAAGCTAATCTGAAATGGGTCAATCAGCTATCGTTGCTGTGCACAAAGAGACGAGTGTTC
GAGATGGAGAGAAATGACCGTGTCTGTGTGTATCTAGGCCGGCTCTCTGATTAAATAGCCATGTTGCGCTGTTGTGTTG
TTGCATTTTGGAGAGAGAGGATACAAAATAAAGAGTGATGAAAACCAAGGGATGAAATAGAGCGGTAATTAATCAGCTA
AGCTCTGGAACGGTCAACAACAGCCACCAGACAGCAAGGTTACGCAAGGTAACATTTAACTGCAACCTGTTGAACCT
TAAGCATATACTTGGAGTCTTACATAAGCATGACATAACACATAAATCTGACTAATAGCGGTAATCAGTAGTTGAAACAAT
AACAAAGCGTTCTCCACCACTGTTTCAGTCAAAAACGGGAGCATGGGGTGGAGAAATGTTACTCATAATTCTATGGA
TGCAAGGACTGACCATCCATGATATTAATATGATCGTTTAAACCATGTTTTCAGGCTATACAGTGGTTGTGATTTTAC
TTTGTTTACAAACATTTGGAGCAAACAAGCTTATATTTGGGGTCTGATGTGGTACGACAGTTGAACTAAGCTCACAAGA
CATTATTTATAAGTTATGTTCTCAGGAATCAATGCAAGGGGTACATATTTGGATTTGACGTTTCTGGACTTGTGATA
TGATGAGCGCTTGTGACTGTGTAAAGTGGGGTTTCAGGTGGGAAACAAGTATTATTGAAGACTTTGGAAGACATGTTGTGA
CTGCTGATAGATGACTGAGCTTTGACCCTTAGCGAATGTGTGCGTGCATAGTCCCTCATATAAGATGAATGAGTGGCGAG
GGGCTGAGCAGAAGAACCCTTACATTTCTCTGAAGGGATTTTCCAGTTACACACATTTGTGGGTTTAAACTGTCTCGCAC
CACACGCTGTTACGAATGAACCCGCCAATTTGGGGCCAGTTAGTATTTTCGTTGAACAACCTGTTGAGTTCTTCTGACTGA
CTTACAATCCATTTCCACAATCCACAATCCATGAGCTGTTAATTTGACCAAGTATATGGGCTGACCATCGCTTGGTCCAAA
TGAGGTGGGTGCTCTTCGAAATCAAAGAGAAGGCAGTTAATCTCCAGAGGGTTAATCAGGTTGACCAATCAATACCAGA
GTTAGGTAACAGGAGATATGGTGGTCAATCAGGCCCTAACTCAATACTAGTGAGAGTGTGATTTGGAAGGTCAAAGTAG
TTACCTGTTGGTCTGATGATGGTGTAGGCAGGACACAGTTAGTCTCCAGCCGTACATGGCAAGACTGGAGCAGGG
GAACATAGTCTGTCTTCACTTGAAGCCCTAAAGAGAGAATAAACAACATGAATATTACATACTCCAGTTATAACACAAA
CACTATACACACGCATGCATACACGTACGCATAAAGACAAGTACGAGGAGGGCTGGCACAATATCGTATAATCTTATA
CTGACAATAACTGTGAACTTCAGAAAATATTATCATAAATAGTCATAATGCATTTTCAATTTAAGAGAAGGGGGATTCAA
CTTCATATTTCAAGTAGATATAAATGACTCAATAGCAGAAGTGGGTAAAGTGGTAGTCATTTTACGAGCAGAAATGGCACC
GTTGGGAGAAGCTTCAATTTCCAAAAGTTCGAAGAGGTTTTTGGAGACAGGGATGTTACCAAAGCTGGGTTGTACTCATTAG
GTTTGTGCTGGCTATTTTTTCCAGAGATGCATTACGATGCTCAAACATTTTAAACAAAATGACAATTATGACAATAACTGT

GCCCATTTGCATGACAAGTAATCTTTACCCAAAATTCCAAAGTATGAAAACACACACGCAGGCAGACAGGCACACACACG  
 CATAAACGAATGCATGCATAAACACATAAACCATATAAACACACATAAAAAGAGTCACGATTACCCAAGCTCTTGACAACA  
 GATGATGAACATATGATATGATGCATAACAAAATACATGCATTTCTGTAGATTGTTTCGTTGGTATGACAGTGTGTGCACA  
 TGGGATTTGGGTTAAAGACACATGCTCGTCGCACGCACACATGCGCTAACGCCTCTGCTCACACAGGAAGTGTGTGTGCT  
 GTTCCATCTCTCTGATCTGCCCTCACTGACAAAACCACAGTATGTGTGATATGAAAAGACAGAATAACAACAAAATA  
 ATCCAGAAAACGCATGTTAGAAATGTTATAAATGATTTGCATTTTAAATGAGGGAAATAAGTATTTGACCCCTCTCAA  
 TCAGAAAGATTTCTGGATCCCAGGTGTCTTTATACAGGTAACGAGCTGAGATTAGGAGCACACTCTTAAAGGGAGTGCTC  
 CTAACCGCAGCTTGTACCTGTATAAAAAGACACCTGTCCACAGAAGCAATCAATCAATCAATCAGATTCCAAACCTCTCCA  
 CCATGGCCAAGACAAAAGAGCTCTCAAGGATGTCAGGGACAAGATTGTAGACCTACACAAGGCTGGAATGGGCTACAAG  
 ACCATCGCCAAGCAGCTTGGTGGAGAAGGTGACAACATTTGGTGTGATTATTTGCAAAATGGAAGACACACAAAAGAACTGT  
 CAATATCCCTCGGCTGGGGTCCATGCAAGATCTCACCTCGTGGAGTTGCAATGATCATGAGAACGGTGAAGATCAGC  
 CCAGAACTACATGGGAGGATCTTGTCATGATCTCAAGGCAGCCGGGACCATAGTCCCAAGAAAAATATTGGTAACACA  
 CTACGCCGTGAAGGACTGAAATCCTGCAGCGCCCGCAAGGTCCTCCCTGCTCAAGAATACATATACATGCCATCTGAAGT  
 TTGCAATGAACATCTGAATGATTCAGAGGACAACCTGGTGAAAGTGTGTGGTCAGATGAGACAAAATGGAGCTCTTTG  
 ACATCATCTCAACTCGCCGTGTTTGGAGGAGGAGGAATGCTGCCTATGACCCCAAGAACACCATCTCCACCGTCAAACAT  
 GGAGGTGGAACATTATGCTTTGGGGGTGTTTTCTGCTAAGGGGACAGGACAACCTCACCGCATCAAAGGGACGATGGA  
 GGGGGCCATGTACTGTCAAATCTTGAGTGAAGAACCTCCTTCCTCAGCCAGGGCATTGAAAATGGGCTCGTGGATGGGTAT  
 TCCAGCATGCAAACTGACCCAAAACACAGCGCCAAGGCAACAAAGGATGGCTCAAGAAGAACACATTAAGGTCCTGGAG  
 TGGCTAGCCAGTCTCTAGACCTTTATCCCATAGAAAATCTGTGGAGGGAGCTGAAGGTTCGATTTGCCAAAACGTCAGCC  
 TCGAAACCTTAATGACTTGGAGAAGATCTGCAAAGAGGAGTGGGACAAAATCCCTCCTGAGATGTGTGCAAACCTGGTGG  
 CCAACTACAAGAAAGCTGTGCCCTCTGTGATTGCCAACAAGGTTTTGCCACCAAGTACTAAGTCATGTTTTGCAGAGGG  
 GTCAAAAGAATTATTTCCCTCATTAATAATGCAAAATCAATTTATAAAAATTTTGACATGCATTTTCTGGATTTTTTGTTC  
 AATAAACCCTACCAATAAAAATATAGACTGATAAATTTCTTGTAAAGTGGGCAACGTACAAAAATCAGCAGGGGATCAAA  
 ACTTTTTCCCCCACTGTATATATATATATATATATATATATATACATATGTCATATGCCTGCACACATTTGATGCTATATG  
 GCATCTACAGTACAGACTGAGGGCAGTGGGTCCCAACCAACAGATAGACAAAACAACGTGAACCACAAAACAAGTCTTAA  
 GCCAAGCCAGTGTGAATTGGCCAGGACCATTGTTGAGAAAACACTGCAGTAGGGTAGAGAGGGCTCTGCTGAAACTGT  
 TATTTACATTGGCATTTGCGAGTCCCAGCATCCCTCCGAAAATCCAGAGCTGTGAGAGCTGTGTTTTAGGGTGTGTGTGG  
 AACCTATGCCAGAAATGGACACATTTTCAAAGCCATAAAAAGCAAAGTAAATTTGGGAAATAAGTTTTGTTAATGGCCCTC  
 TTCATTCCTGAGCGTAACTGAGACTCGAAAGAGTGAATCATGTTCTGGAAGATTCCCTCCCTGTATCTCACCATTTGTCA  
 CCTGTGCTGCATCAGCACATGAGAAACCGGAACCCGCGCTTAGCAGTAACTCCTGTGTTCTGATTGTTGTTGTTAATAATAA  
 TCTATATATAAAAACAGGGTGGGGTCCAAGCTAGGGTGGTAAAGGGCTACATTATCAAGAGTGGAGAACCAGGTTGAGGTAGG  
 GGCTAAGATTTGAAAACAGAACAGCGTTATAGAGTAAACTAGCAGGGTGGGGTGGAGTTCAACTCTGGGTCCAAGT  
 CACTAAGAGTTGGATGAAAGAAAACAGAGCTCTATGTTTTGAGGTAATTCTCCACCGTTCTATTTGATAACACATGAC  
 AGACATAGCTCCCTTTTTGCAATAAGTCTAATTCCTACTTAATGTTTTTACAGGCCGCTAGTCTGGTCTATCAGCCAGGG  
 AAATGATCTAGGCTACTCCTCTAGCCCTCTAGCTGTCACTTTGTCTTTGGACCGTGCCTGCCTTCTCCACCACAATCTC  
 ATTTAATTTTATGGACAGGGTCTCCTGAAGTGGCTTAAAGTCCCATACTGCATGTCAATCATTGAGAGATTTGAGA  
 AATTTTTGAAAACGAAAAGCTGTATTGAAGACTAATCACACATACTGTATAATAATAAATAAATAAATAAATAAATAAAT  
 AATAATAATCAACATAGTCTCAATAGAATATATCAACATTTTGACATTTAATGTAGTTAGCCTAGATGTCAACCAAGCTG  
 ACGTATTAGTCACATATTTGGCGAGCAGAATTCCTCTGGAACTTCCCTCATCCACAAGCCATGAGCATAAATTTCCACATC  
 CCTCATCAAAGTACTGACCATAGGAGTGGACTCATAAGGGAAAGTAAAATTTGGTCTCTGTATCTAGGTCAGCTCTT  
 GTCTCGCCTCGGCTTCAGAGGAAAAATAAATCATTTGCCAAAAGGATACACTTTAATGATCCCTTCAGTGGTCTCCCTGCCA  
 CACCGGCTGCTACATGACTATTGACATGCCTTTGTTACTTTTGACCAGTATGTGTTAAAATACATATTTCAAGCAATAG  
 CCAACTAAACGAATATCTATGCTTAGATAAATTTAAAAGTTATGCAAGTTATTACTAATTTCCCAAGACCCATTG  
 ATGCTGTGAAAGCAAACAGAAAACCTTTTCAGGAAATGAGCAAAAAACCGCCATATTTCTCATTAAATGAACATACA  
 TTATGAAACCTCAGAAGCTATTTTGAATACATGTTATTTGGTCTTAGAGTCATGAAATGTTGAGAATTAAGTGGGGAGT  
 TACTGCTTTCAATACATGTAAAATAAAAAAATGCAGAATGTAGGTATGAGGTATTCATCTGACAGCGATGTATAATTTA  
 GTCTAATTTATGCTATCAACATTTTGAACACCCACTGCATGCTAATTTGGCTGCTCAAATCGGGCAGCACCAATAGGGTT  
 GATGGCATATTTGAGCTCATACATCAATTAAGTCAAGCTTAGCACCATGACAGACAAATGTTGGGAGAACTAGAGTCTA  
 GACTACAAGTTAACTAGAGGGCCCTGACCCGATGACACCTGTTAAAATGGCCAGCTTCAGTCACTGATTTCTAGCCAT  
 CCTTATGGTGTGCTGCTAGCTCGGGCAGCTTAGCTCTCTATTAGAGGCCCCCACTTTTGTAGTGTCTATTGCCCCAAG  
 GTCATGCCAAATATTTATCACACATCTTTGTTGAGCCTATCAGCAGCTTAAATTTCCGGGACTTCTGTTTCAAGTTGGTCT  
 ATCATCAGAAAACGTTCTTTCCCATCTGATGAGCACTTCCACAGTTCCTCCTGCTGAAGTGTTCCTCTGTTGACTG  
 AATCCCTGTAGGTCGGATGTTTAATTTGTCGTGCATCTAAACGTAAGTGCCTTGAGATCTGTGTCATGTTATGTGGAGCT  
 AAGTTTAGTGGTAAATTTGTTGACAATTAACATGTTGATCTTGTTAGCTAGCTCGCGCTCCCACTAGCACTACCGTTAG  
 CATTTGCAATGGAAATGCGTGGAGCATTATATATATATATATATATATATATATATAAATAACACATAAAC  
 TCATGCTCATTGATTTATATATTGATATACATTTCAACATTTACTGTAAATTTATTTGAGCAGCATTTGCCCTGAGTTCAT  
 GTGTACAAGTCCAATAGTTGTTTATGCTATTGGCATGGGACTAGGCCCTTATGCCTGCTGTAGTGCATAGGCTGGCTGT  
 TATAACTTACCTGTGCTAGCTTATACAGCCATGTTGTTTATATATAGTGTGTATAGCCTAAGTTTCTTCTCTCCGC  
 TTCCCTGTAAGAACCATAGTTAATAATCCGTTCTCACTGGACATGATTTCTCAGTTATCTGAACCATGAGTGGTCAGATGTG  
 TGTGTGATGTGTGTTAAATGTGGACATCTTCTTCCATAAATCCTCCTAACCTGGACATCCGCTCATCTCTGACCC  
 GGACATTTCTGATGTTGTTACTACCGGCCCTTAAAGCCAGCACCTAAGATTTCTTATTACATTTCAATCTGTTA  
 CAACTCTACCCCTATTTTCAACACCCACCCACACACCCACCCACCCACGTTACACAGCCACACAGACCCACATTAAGT  
 GTCTCTGTCTGAAATTCACTCTCCTAAGATCCTTTATGGCATTTTACGCTATGTTGTTGGTCTTTAACTCCTATTTTA  
 ACACAATTTGGTCTTGTGACTGAAGTAGTGTCTTCAAAGTTCCAGGCATTTATACAATTGCTGGGAACGAATACAAC  
 AATGTCAATGCTGTTAACTGGTGCCTCAAGCACACAGTATTGTTACTGGTAGAGTTCATGTTAATGCCTCTCCGGATA  
 ATGGCCATGCATTTTGGGTTAAATGTAATATAGCCTGTGAAAACTGAGGTAACACTGGGAAAACATGACGCCCTTGT  
 GTTCAATGTAATGGAGAAAGGCATTTAGTATGACTTTTTTTAAGGCATCTTAATGAGCATTAGAAAACCATTATTGAA  
 TGTTAAACAGTTAAGTCTTATATATGTTACACTCATAGCCATGTTGTGAATAGATGCAGTGTAGAGGTCAATGGAACCTG  
 ACCAAAACAATGGAATTGCCATGGAACGTGTGGGGGAAAGATGCCGTTGTGGAAGATTCCGAATGTCTCATTGCC

CCCTGCAAAATAGCATACATTTAGGCTATTGTTTTATATGTGATTTTCCACACTATGTTGACGTAAGAAATGGAGTATAAT  
 GGTGTATGGATGTCAACCCCAATACATGTTTCATGTCTATCGTCAACAATGAAGTGCCTTGACGTTAAAAATGACTTTGC  
 TACCACCACCGATTTCTGTGTGGTACTTTAGCTATTATACCAGCTTATACGAACAGGAGTTAGCATTAAAGCAGTCACTTC  
 TTCTAAACCTGAAAGGAACAACCTTTCAAATGTTATGACGAAATACAGCCAACCTATATCCAAATCGGACATAGTAACC  
 ACATTGTGGTCTGTATACAATACATCAATCATGACGGATTGACGAATATCCACTTTGTTAGATTTATTGAACGTGCACC  
 AATCCGGCGCCATTCTATCCCTGTGGTCTGAGTTCATTTGACCTCTACCACATCTATGCTATATGAAGTTGCCAAGAATG  
 TGTTTATGACACATTTTACAACGGATGGGTCTAATCCTGAATGCTGATTGGTTAAACCTCATTCCAGCCGGTGTCTATT  
 CCACAAGTTACCCCGGCTAAATCTATGACGTTAAAATGCCTATTTACTCTGTTTCATCTGACTGGGAATCCACTGTCT  
 CATCAGCCAGCCAGCAATTTATAAATCTGATCTCCACTATAAAAAGCATCTAGACATTACTTAACTTTAGTTAACAG  
 CGGAGATTTGTATAAACCTTCCCATTTGTCCTCCCAACATTTGTAACATTTGTTCAATATCAAGTTCGATCTCCAGCTG  
 TCGCATAGTAATGAACCTTGTGGGAGTCAGGATGAGACAGACAGGCAGCTTTCTCAGCCAGTCGAAGTCATGAAAAGGG  
 CCACATTTTTATGGATATATACAAAGAAATATCAATAGAAAACAGGTACAAATAAAATAAAATACAGCTAGTTTGAGTCT  
 TTCCAGCTTTCAGTTTGAAGTGATTATGTTAGCTGTCTGTGGCTAGCCCTCTGAACAACAGGTGTCTGATCATGCCTC  
 ATTAGCTCATTGTTATAGATGTGGCTTGCAGAAAGTATGAACCCCCCTTGGCATTTTTCCCTATTTTTTTTGCATTACAAC  
 CTGGAAATAAAAATGGATTTTTGGGGTGTTTGATTTATTTGATTTACACAACATGCCTACCAGTTTGAGATGCAAAAATAT  
 TTGTTTTGTGTGAAACAAACAAAAATAAGACAAAAAACTGAACCTTGAGTGTGCATAACTATTCAACCCCAAAAGTC  
 AAACTTTGTAGGCCACCTTTTTCAGCAATTAGAGCATCAAGTCTCTTGGGGTATGTCTCTATAAAGCTTGGCAGCT  
 AGCCACTGGGATTATGGCCATTCTCAAGGCAAAACTGCTCCAGCTCTTCAAGTTTAAATGGATTCCCGTGGTGTACAG  
 CAATCTTAAAGTCATACCACAGATTCCAATTGGATTGAGGTCTGGGCATTGACTAGGCCATTCCAAGACATTTAAATGT  
 TTCCCTTAAACCACGCGAGTGTCTTAGCAGTATGCTTAGGGTCTGTCTCTGGAAGGTGAACCTCTGTCCCAG  
 TCTCAAATCTCTGGGAGACTGAAACATTTCCCTCAAGAAATGTCCTGTATTTAGGGCCATACATCTACTTTAAATTC  
 TGACCAGTTTCCCAGTCTCTGACAAATGAAAACATCCCAACATGTGCTACCACCACCATTGCTTCACTGTGGGGATGTTG  
 TTCTCAGGGTATGAGAGGTGTGGGTGTGGTCCAGACATACGCTTTTCCCTGTATGGCCAAAAATCAAAATGTTTGTCTC  
 ATCTGACCAGATACCTACTTTCAATATCTTTGGGGAGTCTCCACATGCCTTTTGGCAAACGCAAACTGTTTGCTAAAT  
 TTCTTCTTAAAGGAATGGCTTTTTTTCTGGCCACTTGTCCGAAAAGCCAGCTCTGTGGAATGTACGGCTTAAAGTGGTC  
 CTATGGACAGATACTCCACTCTCCACTGTGGAGCTTTGAGCTCGTTTAGGGTATCTTTGGTCTCTTTGTTGCCTCTCT  
 GATTAATGCCCTCTTTGCCTGGTCTGTGAGTTTTGGTGGCGGCCATCTTGGCAAGTTTGTATGGTGCATATTTCTT  
 AAAACATTTTAAATAATGGATTTAATGGTGCTCCGTGAGATGTTCAAAGTTTGGATATTTTTTATAACCAACCCCTGATC  
 TGACTCAGAAGAGGTGTGTATATATATATACTAGATCATGTGACAGATCATGTGACACTTAAATGCAAAAAGTTG  
 GACTTATTTAACTAATATGTCTATGAAAGTAAATTTGGTGCACAGATCTTATTTAGGGCTTTATAGCAAAAGGGG  
 TGAATACATATGAACCACCACTTTTCCGTTTTTTTATTATTATATATATATATTTTTACTATTTTGTGTATGTCCATT  
 ACATGAAATCCAATAAAAATCCATTTAAATACAGGTGTAATGCAACAAAATAGGAAAAACGCCAAGGGGTGAATAC  
 TTTTGCAAGGCATTATACACAAATAAATGTAAGTACAAACAGCTTAAACAAAATGCAAAATGCAGCTACTTTGTTGTTGTT  
 TTGACTGCAGTGTGACGTGACTTAAAGTAGCTGTAGTTGGCTAGCTAGCAAGCAAGCGATAAAGAAGCTTGCCAGAAC  
 GAACGACTGGGTCCAGTCATAGATACAAAACAAAAAGACTGAACAAGTGGGTCCGATCTCTGGCAACCGAACCGATAGA  
 ACGAATGACCAGCTGTCTGGGTAGCAACCCCTAGATTTGTGTCCGGACTATACCTTGTAGAAGGATTAATAGTATTTAA  
 AAAATTCAGCGAAATAAAGTTTTTAAACAAAATAGTAAATCATTTTCAAATGTTGTTGGTAACCCGTGTGAAAGTG  
 ATAATGCCCTCGAAGTCAGTGTGGGAGGATATATTGTTGGCTCCCGAGTGGCGCAGTGGTCAAATGCAGCTGCATCTCAG  
 TGCAAGAGGCGTTACTACAGTCCCTGGTTGAAATCCAGGCTGAATCACATCCGGCTGTGATTTGGGAGTCCCATAGGGCGG  
 TGCACAAATGGCCAGTGTCTATCTGGTGGTGGTGGGTTAGCCCGTCATTGTAGAATAAGAATTTGTTCTTAAGTACTG  
 GCCTAGTTAAATAAAGGTTAAATATATATTTTTTAAACAACACCAATGCCATAAATGTAATATATATCTCCAAATATTGGC  
 TTTTCCGGAAATTAACACTTAAAGTATAACACTTCATAAAAATCTCAAGTAATGTACATTTTAGTCAATTTAGCAGACTCTCT  
 ATCCAGAGCGACTACAGTAGTGAATGCATACATTTCTTCAATGCATTTTTCTTTTTTTTTTGTACTGGCCCCGGGG  
 CATTGAACCCCAACCCCTGGCATTGCACACACATTTCTACCAACTGAGCCACAGTATAACCAAAATGTGACCAGTT  
 GCACACATGCATTCCAATCCCCAAAGGACACAGTTAGGCATTAATAATAGCAGTGTATCATAAAGTAATATTTC  
 ACACACATCCACTCTCTGTGTGTTTTCAGTGTCTATCTATGTTATTTGTAGATAAATTTATCTAGAACGTAGAATGTTAG  
 AAATACACTAACATGCCGGTATACTAAGTAGTTCTATCCCTTCCATCAATAAAGAACTAATTACAAGGTGCAAAAATCTAT  
 AAAGAATATTTCTCAGAGGTCTCAAGAACAGGAACTTTTTGTGTGCAGCTTAAAGAGCTCAATGATAAGGGGAGGCATTGC  
 ATTTATTTCAAGGTGAACTTTCCATATTGATTTTCTTTTATGATAGGAGAGACGGGAGCACAGCTCTAATTTGAAATTTCT  
 TGTGTAGGAAATATGTCTAGTTATTCATTTTGGCGGGCTCCATGAAAATCAACTGTATGTCCTATTCTCATTGATG  
 ATTTATTTGTAGAAATAGGAAAAGTCTTCCAGTCAGATGCAAAATTTCTTTCATTGTAGCCGAGCTTGGTCACTCGGCCT  
 CATCAGAGCATAGTCAATTTATTGAAGAAAATGGGAAGTATGTTTCTGATTGGCTAAGGTAGAATGTCCATCCATAGACCT  
 ACGCAGAAATTCGAGCATCTGTACAGTATTATTTTAGCCTTACTTTTCTGATTAATGCTGTAAAGCTATACATTCTTAT  
 ATGGTCAATACATATGACTAATATGAATTTAAAGTACCAATAAATTTGCTGTGAAATGACCCCATCTCCACAAAAAT  
 GTGAATTAGTGACAATGAGGAAGGCTGACTTCTAGATAACAGACCACAAACAGTTTGGCCACAAACAGCTCTACAT  
 ATCAACTGTACTAATCATACACATTTCTACCAACGTGATTTGTGAATACTGCGCAAAAATACTATAAATACAGATTTT  
 GTTTTAAAAGTTGCTATCAATTTAAAACAGAAGTTGACATGTTCTATGCCATACGAAAACAAAATCTCTGAGAAAAGCT  
 GTACTTCTGCTTCAACCAACAATATTTGATTGAAATCTCAGTGAACCCAGCCTGTTTTTCTGTTTTCTGTTGCTCATAAAT  
 CCAACCCTGTCTGCTTTTTCAGCATGACGGGAACGAGAGCGCTGAAGAAAATATCCCAATCAATATTTCAGCATAATTT  
 TTCAGTGAATTTCTGGCACCAGAACGACAATGAGCGGTGAGGATAATTTGCATATACATTTTAAAGCAGTTATCATAA  
 TGAATGTGCCAGCAATGAAGTCTGATCATCTTTGTAAAATAGTGTATCAAGCTAACTTTCAGGAGAGATTAGTCAGGCA  
 AAATGTCTTTGATAAAGTCTCGCCAGCACATTTGATTTGATTTGATTTGATTTGATTTGATTTGATTTGATTTGATTTGAT  
 ACATATTTGCTTGTCTCTCAATGAATTTTCCAATGAATTTTCAATGAATTTTCAATGAATTTTCAATGAATTTTCAATGA  
 TGATAAAAATAATTTCTAAATCTTTTAAATAAAGACATTTATGACAGTATTTACCACAGTATTTACATATAAAGATACCTACATA  
 CTCCATGATTTTCAAAAATGCTCAGTGATAAACCTTCAACAAGACACAAGCGCTAGGTTTTTGTGTAGTGTGGGACACTG  
 ACGAACATTACATTTTAAAGCGGCGAATATTGTGTAGTCTGAATTTCTCAGTCATTTTAAAGGGTTAAGAGCATTTTGTAT  
 GTCATGTGTAAATTTCTGTCTTTGTGAGTCTACTTCTTTCTGAGCTGGACGATGCTCCAGTCACATTTAGGGGACATAA  
 GTCTATTTTCACACTTCGACAGCCCTCAAACTCTAACTCTGACAGTGATACACACACACACACACATAGAAAAA  
 AAGCCTCAAACCTTCAGAAGTAGACAGAAATCCATTTCCAACCTGGATTTGCGCAAACTGGGGATTTAATGGCCGGCC

AGATAAGGGCTTTTTTGCTGCAGATAAGACAAGCCACTGTGACACGTGCCATAGCCACCATGGTTAGAGGGAATATTTTC  
 ATATGATGACTCTCACAGTAAAATGTAAGGACAAACAGCTCCAACCTTGAAAAACTCAAATACTCAGAGCCATGTAAA  
 AAGCCCCTCACATCAATGACAGTCCACTGCTCCACAACAGATGGCCGCTGACTGGTGGTCCAGCTCTGGTCCGCCCT  
 CCGTCCCTCCTGGAAGATGAAGATGCTTTCCACTGACTTAGCTGCAAACTGTGTAGAAAATGGAGAGGGAGGCCATGAA  
 GGAGTTAGTATTTACAGAATGGAGGGTGTCTGTCTGTCTGTCTGCCAAGGCCCTCTAGGCTGTGCAAGAGGAGAGGGAA  
 GTTAATGACATTATGCAGCCGACCAGCAACCCACACACTGGGCCATTTATTACCAGGCAGGGCTGCAGCATGGACCAT  
 TTGTATAAGCAAGGGCTATGGATTATGGATTATGTAGCTATGACAGAAACAAGAGAGAGGGAAGAGAGGGGAGAAGAATG  
 TTTCTTTCAGGGAAGAAGCTTGGAGAGATTATAGATGAACAGACAGGTATTATGGACAGATTGTTGAAGCATAACACGAT  
 TCATCTGAAAACAATGATATGCTTTACATATTGTAGATATTACATGGAAAGGACTATTAGACCAAGACAGGGCCATGGTA  
 CCATAAAATGGCTTTTCTGTAGACTCTATTTCAATTTCAACCCATGGATATGGGTAACATCCAGTCTTGGCAGTATTG  
 GTATAGAAAACATTGGTGAGCTTCTTCCATCCCGCATTTCTTTTGATTCATTGAGCAGTGTGTAGAACCTCTTGCCC  
 TTCAGACCAGGGCTCTCAGTTGGCCTGAGTGCTTTCTCATTACTCTGTACCATTTACACCCATAATAGAGTTTGTGCGGC  
 CCAGGCTCCACCGTGAGACACTCCACATGTCATTACTCTGCCNNNNNNNNNNNNNNNNNNNNNNNNNNNNNNNNNNNN  
 NNNNNNNNNNNNNNNNNNNNNNNNNNNNNNNNNNNNNNNNNNNNNNNNNNNNNNNNNNNNNNNNNNNNNNNNNNN  
 NNNNNNNNNNNNNNNNNNNNNNNNNNNNNNNNNNNNNNNNNNNNNNNNNNNNNNNNNNNNNNNNNNNNNNNNN  
 NNNNNNNNNNNNNNNNNNNNNNNNNNNNNNNNNNNNNNNNNNNNNNNNNNNNNNNNNNNNNNNNNNNNNNN  
 AGACATGGTGTGTTCATTCCCCCTTCCCGCCCTCCCTCCATCCTTCCCTCCACCCTACCCCTCCCTTACATCCCC  
 CCATCCATTGTTCATCAGACGTCTCCCTGCTTGGGCTGTAAATGGAAGGCCCTCTTGGAGATTGTGTGGCTGCCATG  
 CACTGGGATCTACTCAGGTGAGATGCACACAGGGATTGAGTCCCTTTGCTTTAGGAGGAACACAGCTGCCCTCTGGCATGAT  
 GCTGCCAGACACTGAGGCACCGTGGGGTTGAGAGGTTGGGGACATGTAGGGCAACACAAAATAACAGCATAACTTTT  
 GAGTTGAGTCTTAAATGTAGTGAAGTAAACAGAACTTGGAGGGAACACGTTCTCATTGCAATGGGACAATGTAATCT  
 CATCGACTAGCCTATCTTCCAGGCACCTGAGGTTGAACATACTGAGTGAATGTGCGCATACTATCTCTGACACATAG  
 AGAGTGAACAGCAAAGAGTGAACAGACTGTATAGATAGTGAACATGGCGGGCTGAGTGTGACACCGACTGAC  
 ACGGAGCACAACCTGACTAGGTGACAACCAGTGACAGGGGTGTGGACTGAAGACAGGCATAAGTGAGAAGACTGATG  
 CTAGGTTGACATAGACTTTGAAGGAGAGACACAGAGAGTAAAAAACAGGAGGGGAACTAAAGCTTATTGACCCGCA  
 GAAGCAACCGAATGACCCGCCCCAAGTCTGTCTGTTACTGACATGACTTAAACATGTGTGCTTAGCACTGCCGGGGAG  
 AACAGGAGGGCTGTGACAGCTTATCTATATTTAAAACGGGACAGGCAGGAATCCAGAGAGGGAGAGATATAGAAAAG  
 TGGGGTTACTAATGTGTGTGGATTGGCCAGGGTTTTCTCCATGAGCCAAGGTTTGGAGGCTGGGAGCCACGTACCTGT  
 GGTACCAGGGCAGACTTCTGGTGTAGCTTGGGTTTTGAGGAATATGACATGAATAATGTACCCTGCCTTACACAAAAGGC  
 ATATACTTCCAAATCACACTCACAGTCAAGTGGTGTAAAGTACTTAAATAACTTGAAGGTTCTACTTAAGTCTGTT  
 TTTTGGGGGGTATCTGAACTCTATTTTTGACAACTTTTACTCCACTACATTTTACTCCACTACATTTCTCCATCA  
 ATTTTTCCAGACATTTCAAAGCACTCGTTACATTTTTGAATTCTTAGCAAGACTCCAATTACACACTTTAAGAGAACA  
 TCCCTGGTCACTCCCTACAGCCTCTGTTCTGTGCGACTCACTATACACAAATGCTTTGTTTGTAAATATGTCTGAGTGT  
 GGAGTGTCTGCTGCCTATTCGTAACAAAACAAGAAAACTGTCGCGAATGGTGTGTGTTGTTGTACGGGTGTCATAGGGTA  
 GACACCAAGACGCAGCGGAAAAATATATACTCATTTTTTATTTGGTGAAGAAGGGAAACACATATAACGTATAACAAAA  
 CACAAACAACTGGACAGTCTTGTCAAGCAACAGCTAAACAAGAACATCTCCACAAAACTAACAGGTGAAAACAGGC  
 GACCTAAGTATGACTCTCAATCAGCAACAACGATGTACAGCTGTCTGATTGAGAGTCAACACAGGCAACACAGAAAT  
 ACAACACTAGACCTCCCTTAGAAATACAAATACAAATACACCAATCCCAACAAACCCGAAACATAAATCAACACCCATC  
 TTACATAAAATACATATCTAATAAACCTGAACCACTTAAATCAAATACCTTTCTACATAGATACACCACTAAACCCAGA  
 AACACTTTACACAAAATAACCTCTATATAAACACATAACCAAAACATGTACAACAATAACCTCTGCCAGTCTCTGAC  
 CAACTACAATAACAATAGGCCCTTACTGGTCCAGGACGTGACAGCTTATATAAGGAACCTGAAATGATTTACACTTT  
 TACTATTGATACTTAAATATATTTTAGCAATTACATTTAGTTTTTGTTACTTAAATATATTTAAAACCAATACTATTAGA  
 CTTTTCTCAAGTAGTATTTTTACTGGGTGACTTTCACTTTTTACTTGAGTCATTTTTCATTTAAGGTACCTTTACTTTTAC  
 TCAAGTATGCCAATTTGGTACTTTTTCCACCCTGCTCACAGTCAAGCACATGCACAAAACGCACACAAAACACACTGGC  
 CTTCAAGCCCTATTGCAACAACCAATCTTTGGCCATAAAAAATTGCCAGCACAACCTTTCCCTCCAGCTTTCTCACTGAA  
 GTAATACCTTATTGGAATTTCAATTTCTGGGAACTCTCTCTCTCCACCAGGCTTTGCTGAATATTGAAAAGCAAGCA  
 CTATGCTAGCTGTGATGATATGATAGTCAAATGTTTACAGTGCAGGCTACAACCTCTCATTGTCGCGGGGAGATA  
 GCGTAAGCTAAGTGAACAAAGAAAACCTCCCATCAACACCATTAGTGTCAATTCACCAGTAAACAAACTGCTCCCCCT  
 CAGAACTCCAGCCGTGGCGTAGCCGTGTAGGGCTGCAGGGGTGCTGTGACACGCTGGGCTGGGTATAAATCTTTAATGCC  
 CCTCTCATAGACCGCCAGGGTGCCAGGGCGGTTAACGTTACACAGAAGCAGCTGCCAGTCCCAGGGTCTCGCAATTCAA  
 TAACAAACTAATATCCGACCCTCCTGCCGGCAGGTTTCTTTCTGTAACCCACTGCCACCGCTCCTCCGCTCCCTCCT  
 CCCACTAGCCACGCGGGATATTTAAACAGGACTTATTCCCCCCCCCTCCACCAGCAGCCCTCCTCAGTGAAGTTCA  
 CCATGAAAACCCATCTCTTCAAGGGGCGAGGGCAGAGGAGCAGGAAGACACACTGTATGTGTTGTTTCCCTGGACCATA  
 CCAGGGAGGCTGTGACAGCCAGCCACAATCGGGAGGTAGCCGGGTTTAGCAAAGGCCAGCCGAGCAGGGAGAATTC  
 ATGAATATGATTCCGAAGAGGCGAAGGACTGTAGGAGTAAACAACAGCGAAACAAGTTCAGAAACATGGAGGGAACTTT  
 ACATCGCAGAGAGATGATTCTCTGTAAGTAGAAGGTACAGGGAGATGCATAGTTATTAGCATTTGTTAATTTCTGTTTTCA  
 AAGAAACCTAAAAGGGGTAAGCTACCCGTAAACAAATTTGCTTGGCTTGTTTAGGGTTGTTTACATATATAGGTTA  
 TTTCACTAGCGGTTACTTTGGTAGGCATGATGTCATGTAAGGTTGGGAGAACATCGGAAAAGTAGCACTACCAAAACAGT  
 TCAGAGGAAGAGCTTAAACAACAAGAAACAAGGCTGTTTCAAAAACATCAAAAAGGGGAAATGAAAAAACAAGG  
 CACAAGAAGATCATGCAGAGTACTGGTACACAGTTGTATTTACAGGGGACATTATGACAATCAGTGAACACTTATTTTGC  
 ACTTCTGGTGTCTGCTGCGACTGTATTATAATCTCCAATCAAACAGTGTATGCACTGACAGCTACATCTTTT  
 ATTTGTCCGCTTCCAGTTCAGAAATGCCCTTGGTATTTATAGAGCTTAGATGGTCTCAAGCGTCAAGGAGAAGAGTTTCT  
 TCTCATACTCTAATGTATTAGAAAATGGATCTCAAAGAGGTGCTAAATTTGGAGTTGCTGACAGGCCATGGGTTCTCAG  
 GCTTTGTTAAAACAGAGCTCCTCCATTTTGATGTAAATAGCAACAACACATGATGTTGCCCTTGGCTTTGATATCTTAC  
 CGTTACAGTTCACCAAGAGGCTCACACGAACAACAAGTTTCACTAGACAAAACCTGTCTGTTTTTGAAAAGGGTTGGCAGG  
 CATGCATTGACAGGCTGTTCCCAATACAGTGCACCTGACAAGCTATTTATGATAGAGAGCTGACATTTTCCAGATCAATA  
 CAGAACACGGACAAGCAATATTTATTTTATAAATAACTCATTCTGTAATAAAGATGCATATCTTAAACCACATAA  
 AAATGGTAAATATATACAATAACCTACTAGAATAAAGGAATTATAATAACGCGGTTTATTACCCATTTCTAAAGAGAGA  
 AAATATGCAAGGAGGCACTCATTTGCCATCAGGTTAATATCTGTGTTTTCAGAGGGGCTAAGTGCCTTCACTTTAGAAGAT  
 GAATGAATTATGACTCTTATTACTCAAGCTTAGGTTTTTCGTCACCATCAGAATAAGTGGCAGTCCCCAGGGTCTAGA

CACAGAGTGCAATGTGCAGTAGAGGAGTAGTACAGCACACTACCAGAACAGCAACAGCACAGACTGGACAAATTTGAAAGG  
 GGACAGGATATGGAGCCATTTTGGCAATAGCTAAGTCATCATTTCCCTTTGTCTTATTATTAATTTGTTTACATTATTT  
 ACTAACTTTGAACAAAATAGAGGTTTGCACAGACGGATGAAAAAATGACTGAGTACTTTCCATAACTAACTCAGCAAAA  
 AAAGAAAAGTCCTCTACTGTCACACTGCGTTTATTTCAGCAAACCTTAACATGTGTAAATATTTGTATGAATATAAGATT  
 CAACAACTGAACAACAACCTGAACAAGTTCCACAGACATGTGACTAACAGAAATGGAATAATGTCTCCCTGAAACAAAGGAC  
 TTCACCAGATTTGCCAGTTCTTGTGTGAGATGTTACCCCACTCTCCACCAAGGCACCTGCATTTCTTTGGGAGAATGGC  
 CCTAGCCCTCACCCCTCGAGCCAACAGGTCCCAGACGTGCTCAATGGGATTGAAATCCGGGCTCTTCGCTGGCCATGGCA  
 GAACTACTGACATTCCTGTCTTGCAGGAAATCACGCACAGAATGAGCAGTATGGCTGGTGGCATTGTCTATGCTGGAGGGTC  
 ATGTCAGGATGAGCCTGCATGAAGGGTACCACATGAGGGAGGAGGATGTCTTCCCTGTAACGCACAGCGTTGAGATTGCC  
 TGCAATGACAACAAGCTCAGTTCCGATGATGCTGTGACACACCCGCCAGACCATGACGACCCCTCCACCTCCAAATCGAT  
 CCCCCTCCAGAGTACAGGCCCTCGATGTAATGCTCATTCCTTCGACGATAAACGCAAATCCGACCATCACCCCTGGTGAGA  
 CAAAACCACGACTCCTCAGTGAAGAGCCCTTTTTGCCAGTCTGTCTGGTCCAGCGACGGTGGGTTTTGTGCCCGTAGGCG  
 ATGTTGTGCTGATGATGTCTGGTGAGGACCTGCCTTACAACAAGCCTACAAGCCCTCAGTCCAGCCTCTCTCAGCCTAT  
 TGCGGACAGTCTGAGCACTGATGGAGGGATTGTGCGTTCCCTGGTGTAACTCGGGCAGTTGTTGTTGCCATCCTGTACCTG  
 TCCCAGAGGTGTGATGTTCCGGATGTACCAATCCTGTGCAGGTGTTGTTACACGTGGTCTGCCACTGCGAGGACGATCAGC  
 TGTCCTCCTGTCTCTTGTAGCGCTGTCTTAGGCGCCTCACAGTACGGACATTGCAATTTATTTCCCTGGCCACATCTG  
 CAGTCTCCTCCTTCCAGCATGCCTAAGGCACATTCACGCAGATGAGCAGGACCCTGGGCATCTTCTTTTGGTG  
 TTTTTCAGAGTCAGTGAAGGCGCTTTAGTATCTTAATCTTTCATAACTGTGACCTTAATTTGTTTACCTTTGTAAC  
 TGTAGTGTCTTAAACGACCGTTCCACAGGTGCATGTTCAATTAATTTGTTTATGGTTCATTGAACAAGCATGGGAAACAGTG  
 TTTAGACCCCTTACAATGAAGATCTGTGAAGTTATTTGGATTTTTACGAATATCTTTGAAAGACATGGTCTAAAAAAG  
 GGACGTTTTTTTTTGTGTGAGTTTACTTTACTAGAACGATACCATAGCAGAACAGATGTTACATTTGAAATGTAATGTTG  
 GAAAAACACAAGTGAGCGTTGGATAGTTTGTGTTTACCCTGTGTGCTTGGCCAGGTGGAAGTATCCATCAACGAGTGAGGC  
 CCGTGTGTTGAAGTGTGGGTCATGATCCAGCAGCTTGGCCTCCACCCCTTTGACCCCTCGTCAGGAGTTGAACCC  
 TCAGCGTAGCTTCCAGTGTAGTACTTTCAGTTGGCCCTCACGCTCAGTTGGTGGTGAACAGGGCTAGCAGTCCACC  
 CCTGAGAACACAGAACACTCAATCTCAATCTCTTTAGATTGTGCTGACATGAAACATGTCATGCAACAGAGATTCCATAAC  
 GTGACAGAGTGTGACTTTGTAAACAGAGGTGATTTATAACACTTAACAGAGTTGACTCATACCCATAACAGAGGTGATT  
 TATGACACATAACAGAGTTGACTCATACCCCATACAGAGGTGATTAATAACACATAACAGAGTTGACTCATCATCATT  
 TTTCCACAATCCCTTCCCAAAGGCTTGTGCCTCAATGAAATGGTCCATTAATATGGACCAATGCATACAAATTTGGATG  
 GACTGTGTTGTTTGGCAGCAGCATTTAAATCAATTTGGCATAACTCTTCTTTTAAATGCTAATATGCTCCATTTCCAT  
 GTGAACAGAGTGGGAGGCGCAGAATGTTGACTCCCACACAGACTCACAAAAGATGCACATCGCAGCAGCCTCACA  
 CACACAGAGTGCATCAGAGGGGACCATGGTTCAGTTGCTCTGGTTTTTGTGTGACGTCATTCAGTCAGACACCCAGGAAGAT  
 TGAATCATTATATCCATTTCTTTTCTGCCACGCTGACTGATGTGACAGCTGGCCACCAAAATCCCAAATCCTGTCGT  
 TTTCCACTCTTCAAAGCTCCAGAATGACAACCTGAATGACAGTAATGCATCACAACTGTCCCTGCATACGTAGAGAACT  
 ACAAACTTATTGAAACCAAGCCAAGTCAATACAACAAAGTCACTCTACTAATCTTCAATTTTTCTGTTTTTTTTCTCCTCC  
 AAAAGAGTGAATTTAAATGAGGCTTTCACATGATATTAAGTTGATGTTTACTCGTTCAAGGCCAGCGGTTTTGGGAAC  
 TGCTGGCTTCCACTTCCACTAAATGCTCTGTGCTGCAATGTGTGCACAGCCGTTTATAATTTATGCATAGTGCAGAGA  
 CCTTGCACTAAATGCATCCGACTAAACCAGACAGCTCAATGACGACTTAAGAGTAAACGCAATTTAAAGATGAGATAATTTGGTAAATGTGC  
 AACATACATTTTATAACAACACTTATAACAATTTGGCGCATAGGTTATTTCCATTTGACAGCTAGCTTTGTATGCTAGGT  
 TAAGTCTGAGTTACGGTAGAGGTATGACCTGGAGATAAAGATAATCCAGGGTCCATACCTATCAGATCATTTCCACATGA  
 TGACCCTTTCACAACGAACCTGTGTGACAATTTTCAGCATCAGGGGCATCAAAGTTAAACAAATATTTGAGGATCGCCCT  
 TGACTTGGCCTGAGATTTGGATGGCGATAACACAAACAGTAGGGTGATTTGGCTATTGAGACCTGCCAGGTCACAGTCCAC  
 ATGGAAAATGGCAGACCTGCTATGAGACGATACCTTGTGTGGTCCAAATCATTGAGAAAATCGACAACATAACGAGTAAAC  
 GAGCGCATGAACGCAATTAACAACATTTCAAATGGGTCTCCTTTTTAAAGTCTGGTCTGATGGATGCTGTCGCAAGTACAA  
 GGTACGGCCCATAACTCCTTACTGGTAATGTGTACTGTACAGAACCCTGTTGAACATGACAGCATCTGTTCTGCTAATC  
 CACCCTTCTCAACACTGATCTAATCAGGACTAACATTTATAATAAATAACATGCTCAATCAACATGTAGGCCAGCTTTCT  
 TCTGCAACGTGATTTTTAGTTGGAGAGTGGTTAGCTTTATACTGCTTCATTTCTAAGAGGTAACGGCAATATGTGAGTG  
 ACCAATGTGATGTTTGTCCAATCTCTGTCTTTTTTATACCATCATTTCCCTCCTCTCACACCTGTGATCCCACAGGAATG  
 TTCTCAGCACTAGTTTCAATAACCTCAACGGTCTTTGATGCTATTTTATAGCACGTCGGTTTCAAGTCCAGTTTCACTT  
 CTGACTGTTGGCTGTGACCCCTGTCCCTGTTCCACATTTCTGCTGTTTCAGGAGGATTTAGGGGGCAAAGCCACCCAGAAC  
 TGAGACTTTGAGTCAATTTCAGCAGAGAGCAATTTAGCAGAAGGACAAAGGCCACTTTGGCACATGGTACACACCATTTGG  
 CTATGCTGTGGTGGTGGTGGTGTGAACTGTGGAGGTTTGGGGAGGAGGAGGAGGCTGAGTGAGGTAGGGGGGGGGA  
 TTATCTCACTGCAGTACACACTTGAGGGACGTCAGATGGACCAGGGTCTGCGCTTACAGGGAGCCAGTATGTATGGG  
 CACACACGCACAGAGGGGAGCAATCAACACACATGCACATTTTATGAGCACGATTTCCAACTGGGGTTGAAAGAGAATGT  
 GTGTGAGAGAGAGAGAAGAGCTGTCCATCTGGTATTCTAAGATGCTGAAATATGCTAATTTAATCCAACTTTATGCTGCA  
 CCACAGTCTGAGGAAATGAAGAACCAATTTATGCGGTTTCAAGTTGAATCTTGCCCTGGCATACTGTATACAAATCCAAT  
 ACATAGTAACAAATGAAATCTGACAATACTACCAATTTGGGTCTCTGAGTGTGACGGCTTGGTTTCTCTCTCAGTTCTAT  
 GACGTTTTGCTTGGTATTGTTGTGTCAGTGTGCTTCCACTATAACATCCTGATCATCATCTTGGCTTCTCTCTGTGG  
 ATGGTGTATGGGAAGAGAGGACCCTCCCATCATGGTTGCTTTCCCCGACAGTGGTCTCACTCCCCCAGTGTCCCTAGTC  
 TGGTCTCCCCCTCCCCACCTTACATGAGGAGCCTTGGCCCTCATCATCCCCAGTGTCCATCGCCTGCTCCTGGGCTCC  
 TGGTCTCCATTGTTCCGAGGGCTAGTGGGGCTTCCGCTGCTCAGGGAGCCTAGCATGGAGCTGGGGCTGGAGTGGAGGG  
 AGAGGGAGGGCGTCTCTGGTTCTCTGGTCTGGGTACCCTCGTACCCCCACAGGGCTCCTGGATGAAGCCCCAACAATGACC  
 CCCCTGGTCTGCAGACTCTTGGATCTGCTGGAGAGACAGACAGCAACAACCCGCTTAGAGAGATCTTTGGACGACCTGAC  
 TTTTACAATAACACTTAATATAACCAACCTTTTCGTACTGTAGTCACTGTTTATGATGGACTGTTATTAAGATCATGTG  
 GCTAATCATGAGTCCGATCAATGTTGTAGCTTGTCTCAATGGACTTTCTAAAAAATGTGTGATAATCTTGAAACACAATC  
 TAGAACATAAGCACACATTTGCTAAGTCATACCATATAGATCCATAGCTATTTTTTACCCTGAATTTCCCCCATTTCCCT  
 CCTATTTTATCAACCAATGGATTCCAGGGGAACGTTTACATACTGGTATTATCATAGAACTATAGAGGCACTCCCC  
 CTCCCTCCACCCCTCTCCAGCATCAGCCATTCAAATGAACTAGAGCTGATTGGATTGCAATGGCTCCAGCCCTGGCA  
 GGACTGCATCCCAAATCAAGCATGCTTTTTCCATTTCATTGTCTCTGGCATTTTATGTCAATATTTGGGATTTTCCATC  
 AAAATGAAATGAAATGTTAAGTGTCAAGCAGTGTAAATGATGCCATTTCCACTCACATCTGTCAACAAGATCCAGCCA





AAGACACAGTGTAGATGAGCCATCTGAAAGACAGGGAACGAGAAAAGGTACAGATTCAGAAGAACGTGTGTGGTTGCTTC  
AGGTGTTTTGTGCATGGTAGTGGAAGTTATAGTGTAGTAGTACTGACTATAGTAGTAGTAGTAGTAGTAGTAGTAGTCCA  
GTGAATGATACTCAAATTCAGGTAACCGTGATAAACAGAGAGGAGATTCAGCAACTNNNNNNNNNNNNNNNNNNNNNNNN  
NNNNNNNNNNNNNNNNNNNNNNNNNNNNNNNNNNNNNNNNNNNNNNNNNNNNNNNNNNNNNNNNNNNNNNNNNNNNNN  
NNNNNNNNNNNNNNNNNNNNNNNNNNNNNNNNNNNNNNNNNNNNNNNNNNNNNNNNNNNNNNNNNNNNNNNNNNNNNN  
NNNNNNNNNAAAATCCTCTGTCCCCCAGGCCAGTAACTGGTTGGCTAAAAATATCCCCACATTTTCTCAATCACACTCT  
GTCCTACTCCGACACAATACAGGAGCTCCCAGAGCTAAAAGGCATGACAGAGAAAAGAAAATAGGCCACCCTCTCAAAATG  
TGTGGAACATTTTTTTCTGCCCTACTGCCGTTGGAATGTAATTAATCCTTCTGTGATCTGTGATTTTATTTCTGTT  
TTGGTGATCCACAACTCTTTGCCCTTTCCCTTGAGGCTTGGTCTATGCTGTGTATGTATGCTGGGTCTGTGAGATGGT  
GGATATATAATAAAGTGACTAGAATCTCTCTGCTTACTTTTTGAACACTCCATTGAGATGAGTAAATATAGAATGTTTT  
TCATTAAGACCCAATGAAAACACCCCATAGGGGACTCTTAAGTTGCCTCTAATGGCTATGAGAGCTGATCCCTGAAATC  
GAATCCAAAAGCCTTCATACGGTGACCAACCGATATGTATATTTAACATTCACACGCTCTCTTTGAAGCCTAATGCAGGG  
TAATGCGAGGTCTCACAAAATGTGTGATGCGGTGAGAGCGTTTTATTTGGCGATAAGACCCTGTTATCCATACAGAAACC  
CATTTTTTTAAGTAGATAAATTCAGATTTGATTTTGTGCGAGTTATGTATATCTCAAGTCAATGTTTGGCTTAATATCG  
TAAACGTGAGGGCCCTTGTTTGAAAAGCCCATATTCAGACTGAGGCAGTCTGGTTAATGTATCAACAAAATAGGAAGCCA  
ATTTCTTTCCCTTTTTGTTTACCAGAAAATAAATTAACCTTACATAAACAGAAGGAAAAAATGAATCGTACCTTGAC  
AAATAATGAAAGAAAAGGCTCCTGGCTGACAGCCAAATAAATTTGGTTTTCTGTCAAATTTCTGTAGCAGGATCATCAA  
CAAAATACACCCATTTAAGAATGAAGAGAAAACAAAATGTTGGTTTTTTTTAATGATCTTTCTTTCCAGGGTATGTC  
CACACACAGCCATATTAGATGAAAATAAGTTAACTGTTGGATCCTATTTTTGTAGAAAATAAAAAGTTATAGTTAGTT  
GATCTCTTTACATGGCAACTGCCTGGCATTGATCACATGTGCACATTAATACATTTTCTGTGTGTGAGTCACTCTCAA  
GAACATGATGATCCAAACAAGTTTCAAATACTTTTTCAATCATCTTGGTCTACTACACAATACATTATAGTGATATACAG  
AGCTTTCGGAAGGATTCAGACCCCTTGACTTATCTACAATGTATTAATAAATAAACAATTCCTCAGCAATCTACACAAA  
ATACCCCAATAATGACAAAAGTGAIAAAAAGAACAAAACCTTATTTACATAATTTATCAGACCTTTGCTATGAGACTC  
GAAATTTGAGCTCAGGTGCATCCTGTTCCATTGATCATCCATGAGATGTTTTATACAACCTTGATTGGATTCACCTGTGGT  
AAATTAATTTGATTGGATATGATTTGAAAAGGCACACACCTGTCTATATAATGTCCCACGGTTGACAGTGAATGCCAGAG  
CAAAAAACATGCCATGAGATCGAAGGAATGTCCATAGAGCTCCAAGACAGGATTGTGTTGAGGCACAGATCTGGGGAAG  
GGTAGCAAAACATTTCTGCAGCATTGAAGGTCCCCTAGAGCACAGTGGCATCCATCATTCTTAAATGTAAGAAGTTTGGGA  
ACCACCAAGACTCTTCTAGAGCTGGCTGCCCGCCAACTGAGCAATCGGTGGAGAGGGCCTAGGTGCGGAGGTGACC  
AAAAACCTGATGGCCACTCTGACAGAGCTCCAGAGTCTCTGTGAGAGATGGGAGAACCTTCCAGAAGGACAACATCTC  
TGCAGACTCCATCAACTCAGGCCCTTATGTTAGAGTGGCCAGACAGAAGCTACTCCTCAGTAAAACGGCATGACAGCCC  
GCTTGGAGTTTTGCCAAAAGGCACCTAAAGTACTCTCAGACTATGAGAACAAGATCTCTGATCTGATGAAAACCAAGATTG  
AACTCTTTGGCCTGAATGCCAAGCGTCGTGTCTGGAGGAAACCTGGCACTATCCCTACGGTGAAGCATGGTGGTGGCAGC  
ATCATGCTGTGGGGATGTTTTTCAGTGGCAGGGATTTGGAGACTAGTCAAGGAAAAGATGACCGAGCAATGTA  
CAGATATATCCTTGATGAAAACCTGCTCCAGAGCTCTCTGGACCTCAGACTGGGGCAAGGTTCCACCTCCAACAGGACA  
ACAACCTCAGCTCACAACCAAGACAACCGAGGAGTGGCTTCGGGACAAGTCTCTGAATGTCTTGAGTGGCCCAACCAG  
AGCTTTACGCACAATTTCTTCGACCTCATGGCTTGGTAAGCAATTCAGGGTAAGAGCTGCACCTGTTGATTCGGCAAT  
GTGAAAATAAAAATTGATTTTTATTACTTGAACCCGATCGAATTCAGAGAGCTGAAAATAGCTGTGCAGCTGATGCT  
CCCCATCCAACCTGACAGAGCTTGAGAGGATCTGCAGAGAAGAATGGGAGAAAACCTCCCAAAATACAGGTGTGCCAAGCTT  
GTTGTATCATACCCAAGAAGACTTGAGGCTGTAATCGCTGCCAAAGATGTTTCAACAAAGTACTGAGTAAAGGGTCTGAA  
TACTTATGTAATAATGTGATATTTTCAAGTTTTTTTATTTATCAATTTGCAAACATTTCTAAAACCTGCTTTTGTCTTGT  
CATTATGGGGTATTTGTGTAGCTTTGATGAGGAAACATGAATGAATTCATTTTAGAATAAGGCTGTAACGTACCAAAATG  
TGGAAAAGGTAAGGGGTCTGAATACTTTCCGAATGCAGTGTATATTTACCTAGGCTGTATATTTACCTGGGTATTTCA  
CACTCCTTGACTTTTTTTAAACATTTTGTGTCTTACAGCCTGAAATGTAATGGATTAAATTTAGATTTTGTGTGCAT  
GGCCTACACACAATTCACCAAAATGTCAAAGTGGAAATATCAGTCAGCAGTGAACCTTCAAACCAAAATTCATCAATA  
GACCAGAGAGGTTTTCCAATGCCTGGCAAAACAGGGCGTCTATTGGTAGATGTGTGGAAAAAAGCAGACATTGAATATC  
ACTTTAATAAATGATGAAGTTATTAATACACTTTGGATAGTGTATCAATACACCCAGTCACTACAAAGATACAGGGCTC  
CTTCTAACTCAGTTGCTGGAGAGGAGGAAACCGCTCAGGGATTTCACAATGAGGCCAATGGTGACTTTAAAACAATTA  
CAGAGTTAATGGCTGTGAAAGGAGAAAATGAGGATGGATCAACAACATTTGTAGTAACACTGTGATGACCCATATATTT  
ATCCTGATGTGACATACAGTATATTCGTTATTTTATGGCTGGTTATGACGCATTCAACGTTTCAAATCTACATTTA  
TCAAATGTGTGTCAGATGTAATCACCTGCAAAAGGTGATTTCAACATGTATTGACTCTGGGGTGTGAATACTTATGTAAATG  
AGATATTTCTCAATTTCAATTTCAATACATTTGCAAAACATTTCTAAAACATGTTTTTACTTTGTGATTATGGGGTATTG  
TGTGTAGATAAATATTTAATCAATTTGAATTCAGGTTGTGACACAACAATGTGGAATAAGTCAAGGGGTATGAGTAACT  
TTTTGATGGCAGTGAATGTGACATATTATAACAACGGTGGGTCTAATCCTGAATGCTGATTGGTAAAAACGCATTCCA  
GCCGGTGTCTATTCCACAAGTTACCAACCGACTAAATCTATGATGTCAAATGCCTATTACTCTGTTCCATCTGACTGCC  
CAATCTGCTGTCTCATCAGCCCAGCCAGGCAATTTATAAATTTGATCTCGACTATAAAAAGGATCAAGACATTATCTCAC  
ATTTATTTTAGACTAACATTCAGATTTCAACAGCGGAGATTTGTATAAACCTTGTGCTCTCCAACATTTGCAACATTT  
TTCAATATTCAATTTGACCTCCAGCTGCCATAGTAATGAACGTTTTTGGGAGTCGGGGTGAACAGACAGGAAGGTT  
TTCTCAGCCAGTCAAAATCATGACTCAGCATCATTTTTTATGGATATATAAAAATAACTATCAATAAAAAGCAGGTCAAAC  
GAAGTGGAGCTAGTTTGAAGTCTTTCCAGCTTCCAGTTTGAATTTGATTTGTTGAGTGTGTTGGCTAGCTCCTTTGAA  
CAAAATGTCCTGACGAGAAAGCACATTTCTATGTCAGGTGAAATCGTGCATCATCAGCTCCTTATGAATGATCCACATA  
AATGTCACAGCTTAAAGAAACGTTAAACAGCTTAAACAAAATGCAAATGCAGCTACTTCGTTGTTATTTCTGGCTGCATGT  
TTAACGTGACTGTAAAGTTAGCCGTAGTTGGCTAGCTAGCAAGCAAGGATAAGAACGTTGCCAGCCAAATATGGCAATGGA  
ACATTTAGAATGAATGCCGGGTCCGTAAACAGCAAGCAAAAAGACTGAACGACTGGTCCGATTTCTGGTCAT  
GAACCGATAGAAGGAAACAGCTTGGGTAGCAACCCATAGATTTGTGTCAGCGCTATTTCTTGTGGAAGGGTGAATTTGATG  
AATAAAATCATAAAAATATATTTAATGAAATGTCAATCATGATTTAATATGTTGGTAACCCGTTGTATAAAAAGTG  
ATTTATGCCCTCGAAGTCAGTGTGTGACTTCTGCTCGTCCTAACACCCGTTGCCAATATATCCTCAAACACTGGCTTCTT  
GGGATTTATCACTTAATTTATATCATGCGAGATATATGTAATCAAAGGTGACATTTCAACTAATGTGAGCCAGGTGAAATA  
TACTCTATCTACAATGGGTAGATGTCACTATTTTGACATCCTCTAATGATACAATGTTGACGCGCCAAACATGTTTACAGT  
ATATTAGCATCATACACCCACTTGCATACAACATTAAGACATGTATAGACTCTGACATCCCTTATAATGACACCGGCT

CAATGTGTTTATTCGCCCTCTACCATCAGTTCATGTAAGCACCGTTGAGCTCGGCTGTTGCACCTCCATCAGTCAATGTG  
TTAAAAATGAAATGAGTAAATAGGAAATTAATAAGCTGAGAGATTTGAGCGTGTGGGCTCCACCGACGCTCGGTACTCCG  
CCGCTGGGGGACATGGTTCAATACGATTTGATGAACTTTGAGTGGGGGAAAATAGACCCGGAATAAATAGCTATTAGG  
ACTCAGGGAAAAGTAAATGTTCTTCTGCTATCTGCTTTCAGCATCATTTTCCCTCATCACAATTAAGCGCTGTATA  
TTTTTCTACCACACTAATAACTCATTTTGCTTATGGACAATATCATATTCAAAATGATGTACAAAACACTTGAAGATTAT  
AGTATCATTTTCATTAATGAAAAAGTTAGCTGCTTTGAGTTCAGGGTATGGGAAGTGGTGTTTTGCATGACAAAACGAG  
ATGCGTACTGTGGAGTAGAATATCCTGAAACCATACAGGAAGGGACCTCCATATTGTAATTTGATTAGGATACCACAATA  
TGTCATCCAAATGACAATGACTAATGTAGCACCGTGCTCAAAATGACAATAGCCGCCACCCCTTCACTATTTCTCCCCCA  
ACGGGAGTACATGGTGTGATTTGGGAATACCTATGGGGCCTACGGGAGTTCATAAAGCCTTACAAAACACCACAGAA  
GACCATTTAAAACTGTGTTAACCCACCCCTTGCAGTATACTGTAAGTATCCAAAGTACTCATACCCTCATCTGTGTCCAA  
TTAAAAATACTGTCTCCCTGAACCCCTTCTTTCCACTGAGCACAACTCTGGACCCGTATCCACTCTCCAGGCCCTGCC  
TGTGCCATTAGCTTTTCATAGACGCATAATGAAAATGCTGGCAGGTCCCTGTCCGCACCTCTCCCATTTCTTCCCCCA  
CCACCTCCTTCTGTTGAGAGCAGAACCTATGGACCATACTTTCCCTCCATCTCTCTCTGCTCTGGGCCCTAGCAGTATCAT  
TAGCAGTCTTAGCTCAGAGTGTCCACCGTGGAGCCCGGGGGCACAGCCTTGTGCCTTAATTACCTAACTAATGAGTCA  
TTGTGAGAGGCTGTGGTGGCCTGCAATTTGGCCCGCCACTCGCTCAGAGGTAAACAAAATGCACACTCTCTAAGACTTA  
GTCACACCGACCCCGGTAAGCACACAATCTCTCAACACACACAAAAGACAGACACGCACACACATGTACGCTTGATC  
TCTCACACGCACACACACCGGCATTACACCTTTGCTCCGGCAGAGTGGGAGATAACCAGGAGACAAGCTGCTCTGTT  
CCCTTCTCAGATACAGTGTGAAGATGACCACATTTCACTATTTAAAATGAACTACTGCCAGGGTCACTGTTCAGAG  
GGAGGAAGAGTCACTGCTAGCCTGCAAGATGTTGTACAGGTTATGCAAGTCTTATGACAGCTTACACAGTGGCACCGTA  
ACAGACTGCATCATGAGCAGAGTAGGAGTCAAGAGACTGGACCCGTCGAAGCAGGCATAATCGATGAAGAGCTTT  
GGTTTGTGTGTGCTTTGACTAGGCAGTGTGCTCCACAAGGACTGCTAAAATGCTCATTTAATTGACTTTTGAAGTC  
TAGACAGTGCATTTAAGCATCCATCTGTAGATCACCATGTACATATGCAATCCCTGCTACTTTCAATCTCAGCACAA  
CACACAAGCTTAAAAAGAGCGGAAAAGCACAGAGTTAACAAAAATCTCCCTCTTTAAATGTCTAAAGACTGTATGTTGT  
GACGCTAAAATGAAAAGGCGCTCGGGCAGTTGATGGAGGAAAATCACTGTAATTTGTTACAGCTGTAAAAGTTTAT  
AAATAGGAAAAAGGGCTCTCTGGAATAAAGTCTCTCCCTCCATCAGATTTTCTTGACAGGAAGTCTCCGAAGCAAGTTT  
TCTGAGAAAGTAGATCCGTTGACAGCCCTGTTGCTCGGAGACGGGCAGCTCTTGAGAGACAAGCAGTGTAAATGAGCAG  
GCGTTTATCAATGCCCATATGAATCCATTGACGACATTCAGCGGTGCACCACAGCAGCCTGGGTTCAAATAGTATTCTG  
AATCTTTCAAATACTTTAGCTATGCATGACAGAGGTTGCCGTCGAATGAACCAATCGAAAATGTTTAAAAAAGT  
GAAAACCTCGCCACCTGGCAATCCAGGCAGGATCAAGTAAACACTCAAGATCTCAAATACTATTTGAACCCAAAGTCTGG  
CTCCACAACAGTACATGAGTTTCTCTCCCTTCTAGTTTGGTCCATTTCATACATTTTCCATAACATTTTGCATATAGGTT  
CATTGAAAAGAACCCACACTTGAATAAGAGAAAGTGTCAACGCCAATTTGATTGGAAGATCAAAATAGAAATGTAAAATA  
TGGAGATTAGAATTTGACAAAGTAGCTTGTGATTAACATAAGGATTTAGACCCCTTCAACAAGGCTAGATTTCCATTCCCT  
ATTTACAGGCACCTTGTTCCTGGCATCAAATGCATTTCTGTTTACTCTCAAGTCCATAATCTTCTTTACTTCTGTCTTG  
GTTTATATAATGTATGAGAATGTTTTGGGGAGGGATACCAACGACCACAGCTCCAGCTGTGAGAACATTTCTTCTTAGGA  
AAACATGGGGAATCTGCTTAGTGAAAACGAAATAGTTTTTATGTTATCTCCAGGGTTCATCTATAATGCCTACCCTG  
TGTGTTGTACTAGATGTATAAATCACCATCACCATCACTATGACTATGGGGATCATACTTTCCATAATAGAGAGATATT  
ATAAACCACTAGGTGTATGGTAGTCTGTCTGGGTACTGTGGGTGGCTTAGGTTGTGTGTGTGTGTGTGTGTGTGTGTG  
TACGTGGGTGGAAGACGGTACCCACATTTGATAATGACATGCAACAGCCCTAGGTCCCGACATTTCTCTGGGATCACCA  
GTTTAAACATCTCATGTAGTGCCCTTGGTACGGAGTATGGAGAACCACCACAACCTGCAACTCAATACCTAAAGCCTAGTT  
AATTTAAAGGTCCAACTTTTAAATAATAACCCAATGGAGTAGAACCTCAGTGCAGTAGTAGACAATGTAGTGGTATA  
CCTCAGGGCTGAGTACAAGCCCATCTCAAAGGCTGTAACCTCGAATATGTTTGTATGATAAAAATGTGGCAACGTAAACTA  
TCAATGAGGTGTTACATGTTTTTTCAGCTAAACGCAGGCCCTTTGAGAAAACCATGCAAGTGCCTTCAGAAAAGTATTCTA  
CCTCTGAAATTTTCCACATTTTGTGTTGTCTACAGCCTGAGTTCATAATGGATTACATTTATTTTTTCTCCCCATTTAC  
ATACACCCTATAATGACAAAAGTGAACATGTTTTTGAAGATGTTTGCAAAATGTACAGAAAAATAAATAACAGAAAATTAAT  
TTACATAAATATACACACCCCTGAGTCAATACATGTTAGCATCGCCTTTGGCAGCGATTACAGCTGTGAGTCTTCTTGGG  
TAATTTAAGACATTTGCAAACCTAGATTGTACAATATTTTCATATTTCTTTAAAAATGTCTTCAAGCTCTGTCAAAT  
TGTTGAATGATCATTGCTAGACAGTCAATTTCAAGACTGCCATATACTTTCAAGACGATTTAAGTCAAAAACGTAACT  
AGGCCACTCAGGAACATTTCAATGTCACTTTGGTAAGCTAGTCCAGTGTATATTTGGCTTATGTTGTAGGTTATTGTCTG  
CTGAAAGGAGAAATTTGCTCCAGTGTCTGTTGAAAAGCAGGCTAAACCAGGTTTTCTCCAGTTCTTTTATCTCTAAAA  
AACTCCCTAGTCAATGGCCATGACAAAACATACCCATGACATGATGACAGTACCACCATGCTTGAATAATTTGACAGTTGG  
TACTCGGTGATGTGTTTTGTTGGATTTGCCCCAAAACATAACGATTTGACTCAGAAAATTGCCCAAAAACATTTCTGTTTTA  
CTTTCGTGTCTTATTGCAAACAGGATGCATGTTTTGGAATATTTTTTATCTGTACAGACTTCCTTCTTTTCACTCTGTAA  
TTTAGGTTAGTATTGTGGAGTACTACAATGTTGTTGATCCATCCTCAGTTTTCTCCTATCACAGCAATTAACCTTAAC  
GTTTTAAAGTCAACATTTGGCCTCATGGTGAATCCTGAGCGGTTTTCTTCCCTCTCCAGCAACTGAGTTAGGAAGGATGC  
CTGTATCTTAGTGACTGGGTGTATTGATACACTATACAAAGTGAATTAATAAATCACCATGCTCAAAGGGATGTTCAA  
TGCTGCTTTTTTCTTACCATCTACCAATAGTTGCCCTTCTTTGGCAGGCAATGGAAAACCTACTGGTCTTTGTGGTTGA  
ATCTGTGTTTTGAAATTCATTGCTCGACTGAGGGACCTTACAGATAAATGATGTGCGGGGTACAGAGATGAGAGAGTCA  
TCAAAAAGCATGTTAAACACTATTATTACACACAGAGTGTGAGTCCATGCAAGTTATTATGTGACTTGTAAAGCTAATTT  
TACTCCTGAACTTATTAGACTTGGCATAACAAAGGGGTTGAATACTAATTTACTCAAGACATTTCACTTTTAAATTTTT  
AATACATTTGTAAAAATGTCTAAAAACATAATCCACTATGAAATTTAGGGTATTGTGTGTAAGCCAGTGACACACAAT  
CTCAATTTAGTCCATTTTAAATTCGGCTGTAACACAACAAAATGTGGAAAAGTCAAGGGGTGAGAATACTTTCTGAAG  
GCATAAGTGTTTTCAACAATGTATAGAGTAGATTTACACTTCTATGTGCAGCCGGCATGTAAACATGTGTCTGCACC  
TACACACATGGTGAATCATCTCATTTGCTTTACATGACATAAATAAATAAATCACTACTCTTCCATATTTTCCATAGAG  
ATGCACTAGCATTAAACATAAAAAGTTAGGGAGGCATATGGGAAAACAAAGAGGACCCCAAACTCAACTGATTTCCCTG  
ACTGAGTCTGAAGGGGCCAGTGGGATACGTCAAGAGACACTATCCTAAATTAATAAACAAGATACTCTAATCATCCACACC  
CTCTCAGTAGTCAATTAACCTCCATTAACAAAAGCCCTGACTCACACCTCAGTCTCCAGCAGATGGGAGCTCCACCAG  
ACAACAGGTGGTAGATCGTCATGGAACACATTCCCGGCACGATAATGATTGAACCCATGGAAACAATGCTGGGACCTCG  
CTAACAACTCAGACGTATGAGTGAATAACGAGACAGATCTGCAATAAATTACGGAAATGTGTCTATGATCTTTATTAGAATT  
AATTGCCCTACAGTGCTTGGCAAACACCTCCATCTTTTGTTCATAATGACCAGAATATATTGCCATAGACATAGAGGAT

TATTATATATATAAATTGACGCTGTGATACCTACATACTTCACAAGCGATGTACTAAATCTTTGAAAGACAAGACCCGT  
 GTTCCCATGAATTATGAAATAAGTAAAATGCAGGAGAATGACTGAAAACATATGAATATATTAATAAGAGAACAGATAG  
 AGACGACTAGTGATTGACTCAGTTTACACAGTATGAGAGACAGNNNNNNNNNNNNNNNNNNNNNNNNNNNNNNNNNNNNNN  
 NNNNNNNNNNNNNNNNNNNNNNNNNNNNNNNNNNNNNNNNNNNNNNNNNNNNNNNNNNNNNNNNNNNNNNNNNNNNN  
 NNNNNNNNNNNNNNNNNNNNNNNNNNNNNNNNNNNNNNNNNNNNNNNNNNNNNNNNNNNNNNNNNNNNNNNNNNNNN  
 ACACGTATTGGCACCTAGTTCTGGGGCGTGCTCGGGCACCCCCCCCCCCCCCATATCTACATCGATCTAATAAGATAT  
 AACTTAAAATCTGCTTTTAAAAGTCCGATTTTTTCATAACACGCCAGATCAGAGGAGTTCAAACAGCTCCAGAATGTCAA  
 CCACTGATTAGTGGTGTAGGGAGAGAATGGCTGTAGGATAAGCAGGAAGTAGCATGGCAGTCTCGAGCTGTGCATGTCA  
 ATTTATTCGGTGACATTTTTGGAATGACAACTGGAACCCACTAATCTGAATGAGAATGAAGACGAATGAAAAACAACCTGTA  
 CATGTTTCAGATCTGTCATTTAAGTGCACACACACACACACACACTCTCGGTACATTCTGTATCTTGTCAATTCACAGCT  
 TTCACAGAAAACCAATGCCTCATGCACCTTGAGATGACCTTCAACCAGAGACCTTTGAAAACAGAAATGTTCAAACCCAG  
 CTTTCAGGAAGTGAGGTCAAGATTTCCAGAATGAGGACACTTCCTGTGAACAGTGAGCAACAACCCAGTGCCCTCTTTTA  
 TAAAGTCCAAGAACAGCAATGAGAGGATACAATATATCCTCTTTTTACAGCAGACAAATATCATTGTTCTCATTGGGT  
 TGTGTGAAGGCTGGTTCAGAGGTGTTGGTTAAATTTAGCTTGTACTCTCTGCTATCTATGCCATAGATTGCATTTCA  
 ACACAATCAATACTGTCAATTTGGATCAGAGCAACAGGATAATAAGACTCAATAAAGCTGTGAGGGGGCTATAGGGGGTA  
 TTGTATATCAGAGTAGCGGAAGAGGATGGAAGCTAGGATAGAAAATGGGGTTGGTAAAAACAGGCATTCAAACACACAC  
 ATACAACATGCGCGTGCATACACACACACACACACACACACACACACACACACACACACACACACACACACACACAC  
 CACACACACACACATTTTACAGTATATATACAAACACATAATGCACACAGACCCACACTCAGAAATCCACACACACTCT  
 AGAGAGAGAATGAGAACTCTCCTGAAAGCTAAATAAGACAGGTTTATATCTGGGCTGCCAGTAAAACCAAAATCATGAACA  
 GACTATTTGCCCTCCACGAAGGAGAAGAACATATTTGTATGTACAGTATTTACATAGCAAATGATGTTCCGTTCCCA  
 CAGAGATAGACCCTTAGACACAGGAAACAGTATTTGCAGAATAAGAACAATCCTCCTGTAGAATCAAGGCTAATCTCAA  
 ACATATTGCCCTCAGACACAGGCTCAGATACAGGAGGTAGAGAGAGAGGGGAGAGGAAGAACTGTACAGAAATCTGCGT  
 TTCTGTGTGATAAAAACGTTGTCCAGCAGTGTCTGTTTGAAGCTAATGATTAAGAACCTGCTGAGTTTACAATGTC  
 AGACGTTTTAATGCTGCTCCAACACATTTTCTTTTTAAAAACAATAGGCTGGTATTCAACTGCTTGATGTTCAAAAGCAA  
 CAGCAAGGAACATTGACACCAATAGTAGCATAGTAGCAATCATCTGTTGCTGTATGGACACCTGTAAACCTATGCCTC  
 CTGTATCGAGCAACCTCAAACGGTATTTATATGTGACGATTTTACAGAAAGTTAAACATCCTACTTACAGTGTATGACA  
 TCCACTGAGTGTACAAAACATTATGAACACCTGCTCTTTCCATGACATAGACTGACCAGGTGAATGATATGATCCCTTAT  
 TGATGCACTTGTGAAATCCACTTCAATCAGTGTAGATTAATGGGTGGTGACAGGTTAAAGAAAGGATGTTTAAAGCCTTGA  
 GAAAACCTGAGATGGATGGATGTGTATGTGTACCAATTCAGACAGTGAATGGGCAAGACAAAAATTTAAGCGCCTATGAACG  
 GGCTATTTGTAGTAGTGTGCTGCCGGGTTTTTCAAGCTCAACAGTTHCTGTGTGTATCAGAGTGGTCCACCAAGCAAGG  
 ACATCCAGCAACTTGACACAACCTTGGGAAGCATTTGCATCAACATCGGCCAGCATCCTGTGGAAGGCTTTTGACACC  
 TTGTAGAGTCCATGCCCAACGAATTGAGGCTATTTGACAGAACAAGGGGGTGCAACTCAATATTAGCAAGGTGTTCT  
 TAATGTTTTGTACACTCAGTGTATTTGGTACTGATTTAACCTAGTAGGAGCTGTCTGCTATCCAAAGCCTTCCGTGGTT  
 TATTGATTGACAGAGTATGCTAATCTGACCAGTAACATCAGAGGTTTCCATCGCTATCACAAACATCTACAGTTGAAGTCCG  
 GAGGTTTACATAGACCTTAGCCAAATACATTTAAATTCAGTTTTTACAATTCCTGACATTTAATCCTAGTAAAAATTTGT  
 CTGCTTATAGTCAGTCAAGTACCACCTTTATTTAAGAATGTGAAATGTCAGAATAATAGTACAGATAATGATTTATTT  
 CAGCTTTTTATCTGTATCAGATTTCCAGTGTGAGTGTGAGCTTTTACAAACACTCAATTAGTATTTGGTAGCATTTGCCTTTTA  
 AATTGATTAACCTGGGTCAAATGTTTTGGGTAGCCTTCCACAAGCTTCCACAATAAGTTGGGTGAATTTTTGGCCATTC  
 TTCCTGACAGAGCTGGTGAATGGAGTCAGGTTTTGTAGGCTCCTTGTCTGCACATGCTTTTTCAGTTCGCCAACAAAT  
 TGCTATAGGATTGAGGTCAGGGCTTTGTGATGGCCACTCCAATACCTTGACTTTGTTCCCTTAAAGCATTGTTGCCACA  
 ACTTTGGAAGTATGCTTGGGGTCATTTGTGCAATTTGGGAAGACCCATGTGAGGAAGCTTTAACTTCCTGACTGATGTCTTGA  
 GATGTTGCTCAATATATCCACATCATTTTTCTCCCTCATGATGCCATCTATTTTGTGAAGTGCACCAGTCCCTCCTGCA  
 GCAAAGCCTCCACAACACCCCGTGCTTCAAGGTTGGATGGTGTCTTTCGGCTTGCAAGCTCCCTTTTTTCTCCCTC  
 AAACATAACGATGTTTATGATGTTGGCCAGCAGTCTATATTTGTTTTACAGACCAGAGGACATTTCTCCAAAAGTACGA  
 TCTTTGTCCCATATGCAGATGCAAACCATAGTCTGGCTTTTTTTTTGGTGGTTTTGGAGCAGTGGCTTCTTCTTGTGTA  
 GCGGCTTTTCAAGTTATGTCATATAGGACTTGTCTTACTGTGGATATAGATACTTTGTACCTGTTTCTCCAGCATCTT  
 CACAAGGTCCTTTGTGTTGTTCTGGGATTTGATTTGCACTTTTTGCACCAAGGTACGTTTCATCTCTAGGAGACAGAGCAC  
 GTCTCCTTCCTGAGCGGTATGACGGCTGCGTGGTCCATGGTGTATTATCTTGTGTACAAATGTTTGTACAGATGAACGT  
 GGTACCTTCAGGCTTTTGGAAATGCTCCCAAGGATGAACGGCACTTATGGAGGCTACAAAAATTTTTTCTGAGGTTTT  
 TGGTGATTTTCTTAGATTTTCCATGATGTCAAGCAAGTGGCACCTGAGTTTGAAGGTAGGCTTTGAAATACATATACAGAG  
 GTACACCTCCAATGACTCAAATGATGTAATAGCTATCCAAAGCTTCTAAAGCCAGCCATGAATTTCCAAGCTGT  
 TTAAGGACAGTCAACTTAGTGTATGTAACCTTCTGACCCACTGGAATGTGATACAGTGAATATAAGTGAATATTC  
 TGTCTGTAACAATGTTTGGAAAAATGACTTGTGTCATGCACAAAGTAGATGTCTTACCGAATTTGGCAAACTATAGTT  
 TGTAAATAACAAGCATTGTGGAGTGGTTGAAAAACAGTTTTAATGACTCCAACCTAAGCATATGTAATTTCCAACCT  
 CAACTGGGGTGGCAGGTAGCTAGTGGTTAGAGCTTTGGACTAGTAACCGGAAGGTTGCTAGATCAAATGCCCGAGGTGA  
 CAAGGTAAAAATCTGTGTTCTGCCCTCAACAAGGCAATTAACCCATGTTTCTTAGGCTGTCATTGTAATACGAATTT  
 GTTCTTAACTGACTGCTAGTTAAATAAAAAAGTGCATGTCTTGGAAATATAAAATACCCATAATCATTTAGTAGGCTT  
 ACAGGCTCATTCATTTGTCAACCTTAATGTTAGGATTAGGGGGTATAAGGTCATGGGATCCTAGATCTGTGGTTGGGG  
 TCAATATCTACCCTAAGTGTGCTTTTTCTGTTTAGGTCATATCTACATATAAACAACATGTTGAATGGAATCGAGCATG  
 TTTCACTGTGCCATCAAACACCTCACCCATGCAGTGAAGATATAAAGGAAATCTAAAGTAAAACCTGATGACCGTGAA  
 TTCCTTCAATGTCATTTCCCGGAGAACCGACCGCTGTTCAATTCCTCCTCTCGGAGTGGTGAACCTGGGATAAAATCTGG  
 CTCCCCGCATCCAGGGCTAATCTCCACTCAGAACACACTACGGTGTCTAAAAATCCACTGCACCTCTCATTTCCGTGCT  
 CCATATTTCCGCTCCGATCAGAGCACAGGCGAACCCGCTGCTCTACACGTCAGTACACGAGCGGTGAGAAAAGC  
 TTATATTAACAAGAGCACTTCAAGGCTTGGGGTTTTGCATATAAATAATGTGTCTGGAGCCAAGATGAAATCAAATGGT  
 GTGTGCGTGCCTGTGTGTCTGTGCTGAGCTGGATTTGATTTCAAGGACAAAACTCCGCTAGCTATATGCTGTCTACTGGAA  
 ACTAACAAAGTATGTTTTCAATTTTTCATCCTCTTGCATTTTAAACATTTGAAATCACATTTTCGGAAATAAAATACGT  
 GCCAAGCACTCCAAGAACCTTTCTATGTGTGTACGGTGTGAGATGGTTTTCTTCCACACTGGTAGCACAGCACTCAGTTTG  
 TCCTTTCCCTATGGGGCCATGGTGTAAATATCAAATAAATCTTGCCCTCTTGTTTCAAGCCATTTTCGAAGGTAAATGA  
 AAGGTAGCAGCATGGCCATGTTCTGTAATGTGAGAAAATAACTTACATAAACTTGGGGTTATAGCTTGTAGCTAAGGC





GTGCGTTTAGGTTCATGCTCAAAGTATGCCTCGGCTATGTTCTGCAAGCTCAGGGAAACCATCCTGTACATATCTACC  
TCCTCTCTCTCTTTCTCTCTTTCTCTCTTTGTGATGTCTGAAGCGATGGAGCGCTCTGACCAACCTCTGTTCCGGCGC  
AGCCCCTCCACCCTCTACTTTCCCTCTCCCTCTTTTACTCACTCAAGGCTTCTCCGGGAGCCGCACCAGTTCAGCT  
CGACTGACTGAAGAATCCATCTGAGGATGAGGCTGGGGAAAGAGGGCGAGAGGGGAAGGGGGGGGGAATGCCA  
CAGAGAGAGAACGAAATGAGGAGAGGTGAGGAAGCAGAAAGGGTGTACAAGGAGTACAAGTGTAGAAAGAGCTAGGGAG  
ACAGAAGGATGGAATAAAAAATAGTAATTTCAAGGAGAGATATAATGTATTATACATACTAGTATATTCTCTGAGAATT  
TGGTGGGTAAGTGTGTGTGTGTCAGCACTCTGTGGTGACTATACATATTTAAATACGTTCTGTGAGGCCCTTATAGCTG  
CATATTCATTATTACACCAGTCTGTGAGAGGGACCACTGCTCTGGAGATAGTTGACTGACACAGAAAACAGTGATTTTC  
ACAGAACCGAATTTGAAGCAAAAACAACACGGGAAGGGCATGCAACGTAACACGGAAGTTATTTCTTTATGCAAGGCAG  
TGTGTACAGACTTCCGCCGAAGTCCCTCTCTTGTTCGGGCGGGCTTCCGGCTGCAGCTCACCGCTCTTCTAGCC  
ACCGCCGATCCACTTTTCATTTTTCCATTTGTTCTGTCTTTGTCTTACACACCTGGCTTCAACCAATTAATTGTTTA  
TTATTTAACCCTCTGTCTCTCATGTTGTGTTTGTGAGTGATTGTTTTATTTGTATTACAGTCCGTTCTTGTGGACTCATATG  
TTACTTTGTATATTTGCTTTTTTTGAGTAAAGTACATTTATTACTCAACTCTGCTGTCTTCCGCTGACTCTCTACACCA  
GCTACACACAGGACCCTTACAGAAACACACACCCCATAGAATGGAGTCAACAGGAGCAGGTTCCCTCCCTGTTCCAGTGG  
AGGAGCGGTTTCCAGCAGCAGCAGCAGCATGTTGCAATGTCTGGATACCACCATGGATCAGTGTGAGCAGATGGATCGT  
TGGGAGAGAGGAGGTTCCAGCACCTCCACCAGCCCACTACAGCCGGGCCGGCCCACTGTCCACCCTCTTTTACCCCA  
GTCCAGAGGATTCGACTCGCGTCCCAAGGGAGTATGATGGACCGGTCCGAGTGCAGGGGTCTTACTAGGCTTCCAGTCC  
GAGCTTACTTGGGACCCTCCACCCTCTTCCGGGGTGTGAGAGGCTGTCCGCCCTCGTCTCTCTGTCCAGGCAA  
AGCCCTGGAGTGGGCAACGCGTACGGAGTGGGGAGACGCGGAGTGGACCATTACGAGAGTTCCACCCTGTCTTCC  
GGCAGTGTTCGACACCCTGAGGTTGAGGCTGAGCGGTTGGTGAACGTTCTTCCACTGAGGCAGGGGAGCAGGAGTGTCT  
CAGGATTTGCAATTTGACTTCCGACCTGAAACGACAGGGCCTTGATCGATCACTACCGGTGCAGTCTGCGCAGGATG  
TCCGTCGGGAGTGGCTGTGAGACAGCACGCTTCCATTGGACCAGCTGGTGGACCTGTCCATCCGACTGGACAACCTG  
CTGACTGCCACCGCTGTCTGAGTCCATCCCAGCACCTCCACTCCGATGCCATGGAGTTGAGAGGTTGCTGCACTAG  
GGCGAAAGGAGGAGGGGCAATCCCTGCACCATCTGTGCCCGCAGAGGGCACACTGCTGGTCACTGCTGGCGGGTTCCCT  
CAGGGAGTGCAGGCAGCAGGCACTGCACTATCGTGTCACCCAGGTGAGTGCAGCACCAGGCTCACCCAGAGCCCCCTGTT  
GCTCAAATGTATGTGTTTTATTTTCTTTCTGAGTTTTCTCCCGATTTCCAGCATAAGGCACTAGTAGATTAGGGCCAGC  
TGGGAAATTTTATGACCGTTCATTTGCCATAGTTTTAGGGATCCCCTTGTTCCTGTAGATATGCCCTTCCCTGTGCAGC  
CCCTAGATAGTCCGACATTTGGGTCAGGGCTGATTAGGGAGGCCACCCTCCACTAGACATAGTTACGCGGGAGGGTCAT  
AAGGAGAGAATCAGTCTCTTCCCTATTGATTTCTCCTGCGTTTCCCATGGTGTGGGTTACCCTGGTGGCCTGTCATGA  
CCCTACTATTTCTGGCAACAGAGGTTCTCAAGGGTGTTCTCAGGAGTGTGACAGAGTGTCTAGGGGAGTGTGGGGGTTCCTCG  
GTGCGACTACGGTGGAAAGTCCAGACCAGGTCTCCACCCTGCGCGTCCCTCAGAATATGCCGATTTGGCTCTCGCCCTC  
TGTAAGAAGAGGGCGACTAAATTAACCACTCATCGATGGGGGATTTGTGCATAAATCTCCTGGTAGACGCAGCACTTCC  
CAGGAGTCAGTGTATCTCTGTCACAGGAGGAGATGGTGGCTATGGAAACATATGTCTCCGAATCCCTGGGGCAGGGAT  
ACATTCGGCCCTCCCTCCACCCTGCTTCCCTCGAGTTCTTTTTTGTGAGAAGAAGGATGGGGCTCTGCGCCCGTGTATT  
GACTATCAAGGTATCAATCAGATCACTGTGAGGTACAGCTACCCGCTGCTGTCCGCGACCGTTCGATCTATTGGGCCCAT  
GTGTCACCCTCTCTGTGTCACCTGGAATGGTCCGAGCGGTGCAATTCGCTTAGTAGGAAGTACTGGTGGCACACTTGGC  
CAAGGACGTGAGGTTTATGTTTTCTCCTGCTCGGTGTGCACCAGTGCACAGGTGCAAGGTCCAGGCACCTGCCAGAGGAAAT  
TACAACCCCTACCCGTTCCACAATGGCCGTGGTTCGACCGGTCGGTGGACTTCCTTATGGATCTTCCCTCCCTCATGGGGC  
AACACCATGATCCCGTGTGTGGATCAGTTTTCTAAGTCTGCGCTCTCCTCCCTTTGTCGGTCTCCCTACGGCCCT  
GCAGACTGTGGAGGCGTGTTCACACAGCTTCCGGCACTATGGGGTCCCTGAGGACATAGTTTTCTGATCGGGGTCCCC  
AGTTCAGTCCAGGTTCTGGAGAGCATTCATGGAATGTCTGGGGTCTCGGGCAGCCTCACCTCAGGTTTCCACCCCGAG  
AGTAACGGGCAGTGGAGAGAGTAAACCAGGATGTGGGTAGGTTTCTGCGGTTCATATTGCCAGGACCCGGCCGGGGGAGT  
GGCGGCTTCATCCCTGGGAGAGATGGCCAAAACCTCACTCCGCACTCCCTCCACTAATCTCTCTCTTTCCAGTCCG  
TACTGGGATCAGCCGGTCTGACCCTTGGCAATCGAACCCAGATCGAAGTGCCTGGGTGGACAATAATTGTTAAGCGC  
TCGGAGGAGACCTGGGACCGCCCATGTGCACCTACAATGGGACGTGAGGCGGCAAAAAGCAAGCGCCGACTGCCACCG  
CAGCGAGGCCCCGTTCGACCCGGGGATCGGGTCTGGCTCTCGACCCGAAACCTGCCCTCCGCTGCCCTGCCGGA  
AGCTGGTCCGTTTGTGGGGCCATTAAGTCTGAGGAGGCTGAACGAGGATGCTACAGGTTACATCTTCCCTCA  
GATTATCATATTAATCCCTCGTTCCATATGTCTCTCCTCAGGCTGGTGGTGGCTGGTCCACTCCAGGAAGCTCAGGTGCG  
GGAGTTCTCCACCCTCTGAACATCGAGGGGCGCCGCATATGCTGTTCGAGCCATCCCTGGACTCGAGGCGCTCTGG  
CGAGGGCTTTCAGTACTCTGTGGAGTGGGAGGGTACGTTCCGGAGGAGATTGCTGGGTGGAGGACAGGACCTCTGG  
ACCCTTCTGTTCGCGGATTTCCACCGTCTCCATCCGGATCGCCCTGCGCCTCATCTCCGGGGCGTCCCGAGGTCCG  
TGTCGGCGCTGTGAGGACGACAGTCAAGGGGGGACTGTACGACTTCTCCGAAGTCCGCTCTCTCTCTTTGTTCG  
GGTGGCGTTCGGGCGTACGCTCACCGGCTTTCTAGCACCAGCCTCCACTTTTTCTTTCCATTTGTTCTGTCTTTGTT  
CTTACACACTGCTTCACTCAACCAATTACTTTGTTTATTATTTAACCCGCTGTTCCCTCATGTTGTGTTGTTGTGAGTGATT  
GTTTATTTGTATTCGGTATGTCTTTGTGGCTCATATATTACTTTGTATATTTGTCTTTTGGTAAAGTACGTTGATT  
ACTCAACTCTGCTGTCTCGCCGTGACTCTCTACACAGCTACACAGCAGCACCCTTACACAGTGGAAAAAAGTACCC  
AATTGTCATACTTGAGTAAAAGTAAAGTTACCTTAATGAAAATGAAAAGTAAAAGTAAAAGTCAACCAATTAATTTGA  
GTAATAATTCTAAATTAATTTGGTTTTAAAATATTCTAAGTATCAAAAATAAATGTAATTGCTAAAAATATCTTAAAGTATC  
AAAAGTAAAAGTAAAATCATTTAAAATTTCTTTATATTAAGCAAAACCAGATGGAACAATGTTTTTTTTAAATTTACAGAT  
AGCCAGATACTCAACAAATGCTCACTTTGCAAAACAAAGCATTTGTGTTTCAAGTCCAGATCAGTGGCAGTAGAGAT  
GACCAAGTGGTGAATTTGACAATTTCTCTGTCTGCTAAGCATTCAAAAATGTAACGAGTACTTTTAGGTTGTCAGGGAAA  
ATGATGAGGGTAAAAGTGTATACTTTACTTACTCTTAAGAAAATTAAGTTGTCAAAATATATATTAAGTAA  
CAGATACCCCTAAAACGACTTAACGTAGTACTTTAAAGCATTTTCTTAAAGTACTTTACACACTGTGAGGATGGAG  
GACAGATCAATTAATGGGACATCAGCATTTGGTCTGCTGTGTACATGTGGGCTTTCGATCATTGAGGATACTATTCTCTC  
CTGGACAGCAAAAACATTGCTGGACAGTTCAGATATTGGCGCCAGACTGGCAACACACTGTTGTCTGAGTATTTTACA  
TGGAACCAATGCTTTTCCAATGGGAGTCAATTTGTTAATGAATGAGATGTGCCTCCATTAAGAGACAGACCCTCTCTCGAA  
AATAGTTCAGTTGAGTGTACTTTTGACAATGATGTAGTCTATATACGATTCATCCATTTTCTGTCATCTCATTTGTG  
CTCGGCTTAAATGCTGAAAATGAAGGACCAGAGGCAATGCCTTGAGAAAAGTGCCATTTGCCCTGGAGAAGTCAGTAGACA  
AGGGGAGCTTACATTAAGGCAGAAATCAAGGAATCTCAGTTTATCGCAAGTGTGATCACATTGAGCTAACAAT

TGGCTGAGAAGCATTCTTTGTCCAAC TAGATGACAAATCGGAGTGC AAATAAAGTTGAGTTGGCATTCAAGATTCTGT  
 TCTAAATGTCTTTGCGT TACTCATTGGAAATGTTATCAATAAACATATGCATTTTCCCTGCGCTGCATGCTGTGCAGA  
 TGATAACCTCAGCATGCTCTGGTCATAAGAAGCTTATGAACATGTCAGA ACTCTCTGAATGTTGTAAAAATGGCTTG  
 TGTACTTTTTGATCATGGCTGACATTTGAAAATCACATGAAAAGCATATCCATGACAGCATACTTCCATCCCAAGGAAC  
 ATTTCTAGAAATACACTATATACATCTCACAGCCTTTCTGACAAACATGATCATAACAACATCATAGTTATGCTTAGAAC  
 ATTTGATAGCTTCTGAAAGCATTATCTGAAAGCCACTCTGCAATTTGAAAAGATCCCTGGCCTCAGCCCATTTCTTGAA  
 CAATAGGGCAGTTGTATGCTCAAAACAGGGCACTTTCTCCAAGGGCATACTTCTTCCAGTGGTAGTGGGCTCAGTC  
 AGAAGCAACCATTCTTCTCGGGCCAAAATAATGATGCCTCTCTGTTGAAAGCTTGAGATTCTCTTCTACTACACAAC  
 AGGATCCCTATTAGAGTTCAAACTTACTCCCTGAAAGCAAGAATAGGAACTGCCAACACACATCTAGTTCCTGGGCTACAC  
 GCATCCAATTTAATATGGCATATTTAGCATTTGAGTACATTTTACAGGCAAAGGTGACATTTGGATGAAAACACTGTTCCAG  
 GATGACTACTCTGCCCTTGGAAGAAGATTTCAAGCATCATGTTATACGCAACACTGATGGTAAAGAATGGGTAGCTGTTTT  
 CCCGCTTGTTATAAGTTACAACGAAATCAAAAGCTGCCAGTCTGCCAGAATAGCTCTTTGCTGAAGCCTGAAGAACAG  
 TAATGATCATCCACAGTGAATATCCACCATGTTTAGTCGCGGTTATCAGTTTATAATCTGTCAATAAAGAATCATGTTG  
 AGAACAAAGGACATTTACATGATGTCATCAGACTGAATGCTTGGTGGTGTATTAGGTTTATACTTACTGTAAACCTTA  
 AGATGACCCTAAAGGAATGCACCCTGGTTTTACTGACATTTTCCCCTGATACAAGCTCAGAAAACCATCAAAATGGGAT  
 AGCAGCACCTAGCTTAGCCGTAGCTTTGTGCACGCTGGTGTATCATAACAAGATCATACTCAAAATAAGTCTAAAGAAA  
 TTGCTTAGATGGAACCTTTGTGTCTATTGTAGCATGTAACACTGCCAAATCTGGAGAAATTTAGTTAGATTAATAA  
 ACATGACCAATACTTTTCCAGATTTACATGTTCAATTTTCAAATTTTGAAGCTAACTTATGTGCTAAAATGTAACAGTT  
 TATTTGTTAGATTTTAGACAGAGAAACATAATGATGAGAACTGCAAAGAAAACATTTGGAAACATATTGAAAATTTCAACCCG  
 GGTATTGACTGACAGTACTTTAACAAAACAAAGGAATTCGTAAGACTTTATCTTGCACAATACAGGTTTAGTGGACC  
 CACTTATCGTACGGGATGCCTTTAGAGGCCATTCCATTAATATTTCACTCCCCCCCCCCCCAAAAAATGGTACTGGTCAAT  
 GGAGATAAGACTTACAACAGAATAGAACACCTAACATTACACATCAATGGTATTGATAAATGTACTAAAGAAGCACTGAA  
 TAATCTAGACACAAAACAAAATAAGTTTGAGGAAC TTAATCAGGAAGATCAGGCTTCACTTATCTAAAACAACTGAACA  
 AACTGGATGGAGAAGC AAAAAAATTTCTAAACCTTCAAATATATAAAACGCAACA AAAAAGAAATTAACCTTACAGAAATACTT  
 TCACCAAAGGAGATTTTGAATGAGGAAGTAAAATATTTGAAAATAAATGTTCTATTGTCAAGTTCTCTCAACCTCACTTCA  
 CGATGAGTTGTGATATCCTTCTACCAATTA AAAAAAATATATGACAAAAACAAGATTTCTGTGAAGGTCTAATTACAC  
 AAAATGAATTATCGATGGCAATTTGATTCCTTT CAGATGGGAAAAGCCCTAGCCTTGACATTCATAAGCGATATACACA  
 TTTTATGAACTACTGAAAGATCCATTA CTATCATGTTTTAAATTA CTGTATATAAATGGCAA ACTGTGAGACACACAAA  
 AAGAGGGACGGATCTCTCTACTGAAGCAGGAAGCAGGGGGCAGTGCAAAGTACAAAAATTGGAGGCCCTCACCCCTT  
 CAATGTTGCAACACAAAATACTTTGGCAAATGTATGCTCAGAATTTTAAAATAATCATCAGTCGGGATCTTAAAATAA  
 TATTTGAAAATAATTTGAAAATTAAGAAAATGCAGGGAACACAGGTGTAATCTTTATAGAAGATTTGAGAAAGCTTTTG  
 ATACAGTAAGTCCAGAATCTGTTTATAAGTGCCTGCATTTTTTTTACTT GAGAACTCTTATATGCAGGGTAAAAGTAAT  
 GTACAACAATCCTTTGTGTA AACTAAGTTATTTCTCTGAGA ACTTTGAATTGTCAAGAGGAGTAAAACAAGGAAGTCTC  
 CTGTACCATTCTTATTTATTTATGATTTATGAACTGTTAGCTCTAAAATCGGAGGTAA TGATAACATTAAGGGGCTCAA  
 AATTTATGGATTAGAGAATACACAATGAAATATTAAGCCATTA AACCTCTCAAAACCCCCATTATGCCGAAATTTATATCT  
 AAATCCAACTGGTTTTCTTAGTAGGCTACTCAGGCTACGCTACACAGACAGCCCAATTTCTGATATATAATTTCTGCCA  
 GAATTCGTCTTTTGAACATGACATCGA ACTTTCCACAGATCTTTTTCAGAGCTGA TCTGATTGGTCAAAATAGCAAT  
 TAGTGAAAAAAGATCCAAATTTGGGCTGCCTGTGTA AAGTAGCCTAAGAGAGGCACAACCAACGTTCAAAGGGGGGCT  
 TTTGCCATAATACAGATTA AACCACCAATTTCTGTCACTCTGCTCCCGCTCTTCCCTCCCTGGCGCTTGAGGGCGCC  
 AGGCTGCCCTGCATCACTCACTCCTATCATCTATTAGCACACCTGCCTTCCCTCGTCA CGCGCATCAGCAATATTGGAC  
 TCACCTGGACTCACTCGTCACTGTTTATTTCTCCCTATATTTGTCAGTTCCCTTGCCTGTCTGTTCCCTGCTGCTGCATT  
 AATTTGTTTTTTGTCTGTGTTACCTGTTTGTGACGCTGTTACTGTCTCCTTCCATGTCCGGTCTATATTA AATGTTTTAC  
 TCCCGTACTTGTCTGCTCTCCAGCTCATCCGATGTGACAATTT CAGGTGGCTTGACAATGGAACCTATTTAAAGT  
 GTCTCTTTTTTTAAATGAAGCCTACAGATTGGTTGGTTACAATTTCAAATTTCACTCCTCCAGAAGAGGCAGAACAAATTA  
 AGCTTAACCTCAATATACTGACAGAGGAAAGACCCATTTATTG GAAAAAATGTATAAGGAAGGTATCATTTATGAATGAC  
 ATTTGTAATAAGGACTGTA AATTTGTCACAATCACAATTAACAAAGGTGATGGAATGTACAGTATGTTCAATACAAAA  
 GTATAATAACTCATACATCTCTGCCACAAAATGGAGAGGCAAT TACTCAAAAGAGAAAGGAATTAATTGGTTTTGTCT  
 GCCTTCAATGAAAAACCATGCATTTGCTTAA AATGAATAGTATAAAGTATAA AATGTATCAGTTTCACTTAGTTTGACAAT  
 TGTAGAGTACTGGGAAAGATGGCTAAGCAGTGGACATCTGAGGTTGGAATTAGAGTGTACAGTATATGTGATGATCAAAA  
 TAGTTTGAAGTAGCAGTAGAAGTTTACTCCAATCAGGAAAGGAGGATGATAAAAAGTACACTCCCTCCATATGAT  
 TTCGATAGCAATACTTTTTTTGGTATTTTATTTGTTTTTACATTTGGCTTACACTCCAGCATATTGGATTTGAAGTAAAC  
 GTTTACGAAAATATCCTCAAATAAAAGGTGGCATTTCTGTA CTGTGCGCTCATATGAAAACATCTGTTTTACCGTTTAGGA  
 ATGAAAGCACTTTATGCATCTAGCCCCAATTTGAAGCAAGTACTGTATTTGGACAAAATCCCTTAGTGTATTA AATA  
 GTCCAAAATTTATTTAGTCCCATATTTCTTGAATCAAGATTGTGACTTTACATTTGCAGTTTGTGGTGGTGCATTTCGA  
 GTA AACTTAGCCAAAAGGAACTGAATGGTGAATAATGTATTGT CATTTTGGAGTCACTTTTATTTGAAGTACGAATAT  
 AAGATATTTCTGAACACTTCTACATTA CTGTGGATGCTACCATTGATATGGATAATCATCAATGAATAGTTAATAATTA T  
 GTGAGGATACAGAGCACA AAGACCCCCCCCCCCCCCCAGAGGCAATATGAGAAGTTAGCATGTTTTTTGTTATAG  
 CCTCTAACCTTTTCACTCACCATTTATTCATTTCAAAA TAAATAATGACATTTATCAGGATTCATTCAGAAGTTTTCAGGGAC  
 TAGATAAAGTGCTTTCA TTTCTGAACTGTAAAACAGATATGCATGAAAATACCCTCAAAAAGGTGACACCCTGTTCTGTT  
 GCCTCATGAAAACATTTGATCTAAAATCCAAAATGCAGAGCCACATTTATACATTTCTGCTTCACTGTCCAAAATACATATG  
 GAGAAGAGTGTAGCTGCCTCATCTTTTAAAGAAGTGAGAGTGCCTCTAGTGT TATTACTGAAGGTACAGCTTCACATG  
 GCTCAAAATATTCAAGAGACACTGGACA ACTGGAACGTACAGTCTGAGGATAGTTC AATAATCTATAGGTCATACAACTGT  
 GTGTGGGGGTGGGGTGGTGGGGGGT CAGGGATTAAATATTAATTTAAAAGGGGCAATCAGGATTTGTTACATCCATTT  
 AGGTAATTTAAATTAATACTGTAGAGCAATTTAGTCTTG AAGAACATAA CTGTATTGTGATTTTTTCAACTGTCT  
 TACCACATCAGGAACAAAATAAACAATTTCTGAGTCTGAAAATAACCAGTTCTTCAATGGCCTGCATACTCTATGA  
 CCAACAGATGCATATCTGTATTTCCAGTCATGTGAAATCCATAGATTAGGTTCTAATGAATTTATTTCAATTGACTGATT  
 TCCTGATATGAACTGTA ACTCAGTAAAATCTCTGAAGTTGTTGCATTTATACTTTTTATTCAGTATATTTAGGTCAGACAG  
 CATACTATGATTTGATGCATCCCCAAAATGTATAGTATGTAGAGAGGAACCCCAGTTAAATATACAAAACATAACAAGT  
 GTTTATGACAGAGATGAACGATGGTAAAGGTGATATGACATTGAAAGACATGACGTGGGTGCTTGGTTTCAGCATATTTCT







TTCGCTTATGGCTATCAATGTGAATAGGTTAGTGAGAAAAGACTAAAGTTGATGTTAAAAAAGGTAACAAAAATGCCAT  
 AGATGCTATCATACAGTTGTGCAAAGGTTCTGACAACAGGTCAACTAAGGCAAGGTACTCCATACTGATCATGTGGATTC  
 TTATTCTAGATAGGTGCGACTCTCTCTCCTCCGGATTTCAGACACAATGTTTGCGATATTGGTTTGCACTCCTGACACTGCA  
 TGACGTGTAAGTGGCTGCAATGTGGTAAGTACTCCTCAATTTGCTGAAAAGAAAACCACATATGTAATCTGAAAACAGT  
 ACATTAGATGTGAGGGCAATTACATGTTAAAGTATTTATGAAAGATCTTATTCTGAAAAGCTTTTCATTCTTTCCCTTGAG  
 CCATCTCCTACTGCTGTGTCACAGTCAAGTAAGTACAATGCCTTACGAACATTCTAACACAGTCCCCAGAGAAAAGTCTA  
 CACACCCCTTGACAGCTCCGCATTTTGGTGCCTTAAACATTTAAAAAGCGATTCTTTTCATATGTTCACCAACCTACT  
 CCAGATTGTAAAAGTAAAAGACTGTTATAGAACATTTTCCAAATCAATCTAAATTAATGAAAATGCTTGTATTGCATA  
 TGTCTTGACACCCCAAGTTCATACTTGGTTGAAGCACCTTTGGCAGCCCTAAAGCAATGAATCATTTTGAATAAGCAA  
 TATTCAAACCTTTTAAAGGAGATTAGTTTCCAGATTGGCACTGGACCACTTGAGGAACAAGTAAACACCTCTTGGAAAGC  
 CATTGAGATTATGCTTTGGCATTAAAAATAGTTATAATTTTCTGAGAAAAAACCCTCCTGGTTGGTATTATGGTG  
 GCAGCATCATGTTATATGTTGCTTGTGTCATCGGCAGGGACTGGGGAGTTTGTCATTTCAAAAATAAATATGAAAAGCCGC  
 AAAGCCCAGGTAATATTTGACAAAAAACCCTCCTCAGTCTCTGAAAACCCCTGGGATAGAGTTGTATTTTTCAGTGA  
 GACAATTATACCTAATCTTATGTCAGACACACCCGATGGATTTCAAAAGGTGTTGTGTCGTGCGTCCAGTGGTCTGGACTCA  
 GTCCTGACATAAATCTGCTTGAAGAGAGTTTAAATATGCTTTCCATCAATGATACCCAACCAAATTTACTGCGCTTGAG  
 CAATTTTGACAAAAATAATGGCATAATGCTGCCCTAAGAGTTGTGCAAAAGTCCGGTAGAATGTTATTCTAAATGATTTAC  
 ATCTGTAATGGCTGCTCCACCAAGTATTAACCTCTGGGTGGAAGACATACGCAAAAACAAAACATCCTTGTGTTGTTG  
 TTGTGTTTACATTTTCTATAACTTTATTTTACTTTCAGAAAAGTGGAGTAGGTTGAGTAGATCTGTAATGAGGAGAGA  
 AAAAAAACCCGATTTAATCCCTTCAATTTTCATGCAGCAAAACGTGAAGACTGCAACAGATGTGTACTTTCACTATCC  
 TCTACCAACATGATTTCAACTAATCAACTGGATTAGTATTACACACAATGTTTAAATTCATCATGTGTGTTTTTCA  
 AAAGAAAGTGGATTGATTTGGGACTCATAATCAAGATGTTGGAAGATATTAGGAGTAAATAGTTGCTTGTATTATGG  
 TTTAGTGAAGAATTACCTGTGGGGTAAGTAATGTGCATATAATCCACAATAAATGTGTGTGTGTGTGTGTGTGTGT  
 TGTATAGAATTTGCCAAAACACAGTAGTTCAAGTCTGAGTATGAGTTAAACAGCACAACCCCTCCGGAGAGCGGTTAC  
 GCCAACTGATAGAACATGCTCAAGATGGTACGCTTTCATGATTATACATATACTTCCATCAGTAACAACCTCAGAATCAAT  
 GTTCCATCGTAAAGGTTATAATCCCTGATATGTAATTCATAGAGCAGCCCTATGGTATACTCCTTGGACACTAGTATGT  
 GGATGTCAGTCTTGTGGATGGCATTATCTAGAGCTTTTGTATCTGATCTTCCAGAACTGGAGTGGAGGACGAGCCCA  
 GTGCTCAGGCTTGGGTTGACACCTGCTCCATGGATCATGGCCACCCAGCAGTCCGATGCTTGGCGGTACGGTTTCCCT  
 TTGTCCTCCTTGACATCTTGTCTTTCCTCTGATGTAGAGCAAACAAAGACAAATATATTTTATTGATTCATGCAACT  
 CAAGACTTTGCGTGAATGGTATCAATGTCAGCGCAATCTTAAAGCTCAAATATATTTGGAATGTATGATTTCTTATCAC  
 CAGTGACAATGGTAGTTACTCTGTTATCTTATGTTGTTGTTTAAATTCCTGCATTAACATATGTTTGTGTTAGTCAACTG  
 TTCCAGCTTGAATTTACTGTTACACACCTACAGTATGTAGTAACTTTTCCATGCATGCTTTACTTTTGAACAGATTACG  
 AAATGGGTGAGAACCCTGTTCATGTCCTCCGCTTTTAGGAAGTGGACTGCAGTAGTTACAGCCTGGAACAGTGGAGTCAA  
 GATTACTCCTATCCCAATGGATCTATCAATGGTAAACCATCGGCCACTACACACAGGTAACATTCATCTTATGTGCAGA  
 TACATATGACATGAAGAAAGTATTAGACCCCTTGACTTTTTCCACATTTTGTACGTTAGCCTTATTTCAAATGGAT  
 TAAATAAAACAACCTTCTCCACATACAATACCCCATCATGACGAAGCAAAAACAGTTTTTTTTTTTTAAATTTTGCACATTT  
 ATTA AAAAACA AAAAACA GAAATACCTTATTTAAATAGGTAATTCAGACCCCTTTGCTATGAGACTTGAAAACAGGATGCACC  
 TGAGCTCAATTTCCATTTGATCATCTTTGAGATGTTTACAAGTTGATTGGAGTCCACCTGTGGTAAATTCATTGATTGG  
 ACATGATTTGGAAGGCACACACCTGTCTATGTAAGGTTCCACAGTTGACAGTGCATGTCAGAGCAAAAACCAAGCCATG  
 AGGTGCAAGGAATTGCTGAGAGCTCCGAGACAGGATTGTTGTAAGGCACAGATCTTGGGAAGGGTACCAAAAATATC  
 TGCAGGTTCCCAAGAACACAGTGGCTCCATCATCTTAAATGGAAGAGTTTGGAAACCAACAAGACTCTTCCTAGATCT  
 GTCTGCCCCGCCAACTGAGCAATCAGGGGAGAAGGCCATGGTCAGAGAGGTGACCAAGAACCCTGATGGTCACTCTGAC  
 AGAGCTCCAGAGTTCCTGTGGAGATGGGAGAACCCTCCAGAAGGACAACATCTCTGCAGCACTCCACCAATTAGGCC  
 TTTATGGTAGAGTTGGCAGACAGATGCCACTCCTCAATAAAAAGACACATGAAAAGCCACTATGAGTTTGCCAAAAGGCA  
 CTTAAAGGACTCTGACACATGAGAAACAAGATTCTGTGCTGTGAAAACCAAGATTTGAAGCTTTGGCTGAATGGCT  
 AGCGTACATCTGGAGGAAAACCTGGCACAATCCATACAGTGAAGCATGGTGGTGGTGTGCAGCATCATGCTGTGAGGATGT  
 TATTAGCGGCAGGGACTGGGAGACTAGTCAGGGTAGAGGCAAAGATGAACAGAGCAAAGTACAGAGAGAGATCCTTGAT  
 GAAAACCTGCTCCAGAGTGATCAGGATCTCAGACTGTGGCAAAGGTTCACTTCCAACAGGACAACGACGCTAAGCACAC  
 AGCCAAGACAACGCAAGAGTGGCTTCCGGACAAGTCTCTGAATGTCTTGAAGTGGCCAGCCAGAGCCCGGACTTGAACC  
 CGATCAAAACTCTCTGGAGAGACCTGAAAATAGCTGTGCAGCAACTTCCCATCCAACCTGACAGAGCTTGAGAGGATC  
 TTCAGAGAAAGATTGGGAAAACCTCCCAAATACAGTTGCGCAATCTGTAGCATCATCCCAAGAAAGTACGAGGCTGT  
 AATCGCTGCCAAAGGTGCTTCAACAAGTACTGAGTAAAGGTTCTGAATACTTATGTAATGTGATATCAGTTTTTTCTTA  
 TTTGATAACAGATATCAGTTTATCTTTTCCGGATAACAAAAACAGTTTTTGGCTTTGTCTATATGGGATAATTGTGTGTAGA  
 TTGATGACTCAAAAAAACTATTTATCAATTTTGAATAAAGGCTGTAACTAACAAAACAAAAAGTAAAAGGTTCTGAATA  
 CTTTCCAAAGGCACTGTGCAACATCTGATCAATCAGAGTTCTATAGGCCATTTATAGAGAAAACAGTCTGAGGCCGAT  
 ATCAAAAAGAACAAATAAGTTAATGAATCAGGATAAGTTTGCTTGTAAAAAATGTACAGTAAAACAATCCGAAAACA  
 CACCTCCGTTCCCTTCACTGGATGGCTCATCAATTTCTAAATATCTACAGTGTCTCCACAGAGACAACCTGACCACGTTT  
 ACAACGGACAAAAACAGTGACAAAAACAACCTTCTGCATGAAAAGAAAAACAGCAGTTAGCCACTGCATCTACACAAAACCTAA  
 CTATTTTAGAAAATACAAAATGGATTACTTAAACAGTCAATATACTGCTTGGACCCCATGAACATCTCTCCAAAACACAT  
 CAAAGACAACCTGCACCATAACTTTCAAAGTAATACATGTGCTGTCAAAATTTGAATAACAAAACACAGATAGAGAAAATAA  
 CATACCTTGTGAACCATTGGACCACCCAAAACAGAGTGCACAGCAACAACACTATACAGTCATAAACAACCTGGACCTTT  
 AGGTACAAAAGGACCCGCAATGGACTATGGGGTATTTTTATACATTTGACATGTCACCACCTAATTAGGGTCCAGATAGG  
 AACACACACAAAACCTACAGTTTATATTCTGTCCAGTATATTTTCCAGGATATTTAATCGCATATATCTGTGACACCA  
 AAGGATATACTACAAAATAGATTACTAATTTATGACATTTCTTTGGTAGCAATTTCAAGTCATTTGATTGTGATACATC  
 ACTGAGTATACTCAACACATTAGGAACACTTCTTAATATTGAGTTGCCACCACCACAACCCGGTGGCCTGGCACACTACTAC  
 CATAACCCGTTCAAAGACACTTAAATCGTTGTCTTGGCCATTCACCCCTGCAATGGCACACATAACAAAATCCATGCTTA  
 AATTGCTCAGGGCTAAAAATCTTTCTTAATCCGTTCTCCCTCCCCTCATCTACACTGATTGAAGTGGATTTAAACAAGT  
 GACATCAATAAGGGATCATAGCTTTAGCTGGATTCACTGGTCACTGTGATGAAAGAGCAGGTTCTTCTGTTCTT  
 AACATTTTGTATACTGTATATTGTTTATGGACCATTGTGCTACACCTGCAATAACACCTGCTAAATATGTTTATGCGACCA  
 AGAAAATGTGATTTGATTTGCTATGCTGTATGGTAGTCAGAGAGGTGTGATTTACCGACAAGTGTCTCATCATGTTATTT

GCCAA TGAACTCTGATAACTAACTGCATTTCCCTTTCATATAGGTGGTTTGAACAGTTTCATACAAGGTTGGCTGTG  
GTGTGGCCCTAGTGTCTCGTTCAGTCTACTTCTATGGATGCCAACTACAGAGCGTATGTTGCGCCAAATCACACCCAAA  
ATGCACCTAAGCCTGTGTACAATTCACCCATTTGCTAATCACTGGTAGTGGAAAGGTAGGCATCATCCAGCAATCATT  
CAATCTTTGGTTTAAAGGGTAACTACAAGGAGTGTCTTACATACAAGGAAGGAGCTACATGTGCTACTGCCAACCT  
CCTGCGAAAAAATAAGCTTTGCGAGTAAGTATCAGACGGGATGAAAACACATGCATGCCGTCTAAAATCTTACCAATATGACT  
CAGCAATGTTAGTGTGCCTTTTAAAAACATGTTTCCACCGGTTCAATGTACAATAATCACCAAAATATAAACTGTCAACAT  
ACAATGAATGACTGCCAATGTTTATCTCATGTGTCATTTTCAGCCAATCCCTGTCTTACATAAAACAAGTATTCCAAT  
GTGACGCCATGAAAAACAGGCCGGTGCACCAATCCCTTTGGTGTACGCCCTGGTGTCTGCCCTCTGCCTGTGCACCTCC  
CAAATCTCATGAACCACCAGACCTCTTAAAAATGGTCCACTGAAAGATAACTTTGAATGATTCTCTGTGTTCTCTTG  
TCTATGAGAAGATAACCTGGCTGATCTTTTCTACTGTACTTCTGGTGAAGTCAAGTAAATTTGAAAAATACTAATCATA  
TAATAATATCTTAATATCACTGTAGGTCTAAGGTACAGTTAAACATTAACATTAATCTTATTTCTGGGGTAACATA  
AGGTGTCTAACCTATAGTAACATAATGTTAGTTGGAAGCGTAGCAATTTATTTTGTTCCTTTTATGATTTCATGTCTT  
CATAACCAATTTGACCCAAAAAATCTGCATTTGATTTGCATGCAAGTTGAATAAGAATATCTTCTACATTTTGAGAAG  
GCAATATTTCCATCAGTTACTGTAAACAGTGAACATTTTGTATAATCCATTTCTGCTAAATAACTACACAGTAATATGGTT  
ATACAGAAGTGTAACTCAACACATTTGAACTTTAAGTTGATTGAGGGCATCATTTTATGTTTGTGAAATGCAAGGAA  
TGCTGTCTATAATTTCTCTATCAACATGAAATGTTTTACAGTGACAGAATTATATAACCCCTTATGTTTTCTCAATCA  
CATTAATGATCATGAAGATAATTCATGGAGTCTGTGTTAATGGTTTTACAACCCCAAGCGCAACTCTTCTTATG  
TTTTTAAATGGCACTGAGATGATGAAAATAGAACAAGCCCTCAGTAGTCACTCTCAGATAGTCAAGCGTACCACCA  
GATGCCCTGTTGTACAACAGTACATTTCTGTATCAGAATAACATGACTATCTGCAGGCTTGATATACACCGTCCCTTCTC  
GTGTCCCTTACAACATCTGGAAGTGCATCAATAGGTCTTTTAAACAATGGTTTATGTGAAGTAACTCTTAAATAAGAAA  
AATTCACATGACTTAAATAAGAACCCTGAGAAGGCAACACAAGGTGGAAGTGGCACGCTGATATAGAGGTAAGGTAGTC  
TGCAGTATATTAATGTCTGGAATGATGCAAAAAGGTTCAATGAACTGTTTATGGTCATGTCTAATGTGTAGGCTGC  
ATAAAGTTGATCAATGCAACCTCCCTGCACATAAACTCAGACATGGTTAACTTTGACTAAAATATAGAATGTAACATG  
TAAGGATCCCTTTTGAATAGCTAAAGTGAATAAGACTGTCTACAAGCAAAAACATGAATTAATACTGTTTCTGTCAAT  
AACTCTATAGGCTATGCTATTTGAAAGAACATATAGTCTTCTGTTGATAAATTGACATAAAATACAGCATATTGATAACGTC  
CAGATGACATTTTTCAGACCGTAAAATGCTATATTTTACCCAGGAAATCATTTGGATTGACACAATCTGAATTAATC  
CAAGTCTTAACATTTGCTGATTAACATACCAAGCGAAAAATGTGTAAGATTTTAAATATATTACAAGTATACAAAAAAT  
AGAATATACATTGAATACGAGATGATTTTTTCTTGTATATCTTAAGTATACTATAACTATAATCTCATTACACTTATCAT  
TACACACTTATTAAGTGTACTTTAAATTAATTGTTTTTAAAGCTTTTAAAGTATACTATAAAATATACTATCGTCAACCTT  
AATCACTTATTAATAATAGTTTAAATTAATGCTTTTTCAATCTTTAGTATACTATACTATGTTTCACTTCTTAAACT  
AAACACACTTATAAAACTGTACTTCAATTTGAAACCGCTTTAATTGTCATTTTTAGTATACTAATTAATAAACTTGG  
GTTGTTTTTAAATGAAACATTGATTTAAAAATATATATATATTTTTTACCCCTTTTTCTCCCAATTTTCGTGATAT  
CCAATTTGGTAGTTACTGTGACAGTCTAGGTGATGTGGTAGGCGGAGTCAAGGCGCAGGACACAGAGATGAGTAAATAAG  
TAACCTCACTCAAAAAATAATCCTCCAAACAAAGGAGAAAGGAAAATCCAGAATCACATAAAACGAGACAACGACAACAATA  
CACGCACAAAGCCATGATGGCTCCAGAGGGTAAAATAGGGAAATAATTCAAATGAAATGGGAACCAGGTGTGTACAATA  
AGACAAAAACAAATGGAAAAAGAAATGTAGATCGGTGGATAGCTGTGACGTCGATCGCCGAAACCGCCACCGAACAGGAG  
AGGCAACAACTCCGGCGGAACTCGTACAGTTACAGTCTTGTCCCCTGCCTGCAACTCCGGTACGGAGTCTTGAGACA  
AGGGTTATGGTCCAAACACTTAAGACACACCCTCGTCCACTCACCCTCGCCATATGTCCTTGGGGGAATCCATCTTGGAG  
GGTGGTCCAAATGATTAGCCAAGCAAGGGAAGTTTGAACGTAAGGCCCTCAGCCCTCGTTTTTAGTTGGCTTTGCGAGT  
GTATAATTTAGTTCACTCCAGGGGCTGAACTCCCATATAATTCATTTGCGACGATTGTACATCCGCTAAGAAAAGTCA  
GCGAAAACCTTAAAAACAACATCAATGGAGAACTCAACATAACAAGTGTAAAGTAAAAATGAATGCAAACTGTAAAGTTAGA  
AATTGTGCTACTAATGCACATGACGGCAGCTTGTGAAAAAGTAAATATGTTTTTGTGGTTATGTTTTTGAATTTGTA  
GAAATTAACATTTCTCTTTCAGAAATTTCCAGTAGGCAAGCTAACGTTAGTTAGTAAATTAATTTGCTAAATGGTAG  
GTGTATATAATAATATATATTAATAATAAGTACAGTGTCAATCATAATTAAGTGTAGAGCATATAAAGCACCACAAG  
TTACCGGTGGCTGAAAACACAATCCTGCTGGATGAATGAGTGACGAATTTCTGGCCAAAGGGTGGTCCATTTAAAAAAC  
ATCTCTCCCTCGCCCTTGCGTATACTCGTCAAGCAGTCAACAGTGTCCACTAAATTTGAGGGCTGAGGGGATAGGG  
TGTGCTTTTAAAGTGTGGAATGCAGCCAAGGTACAGACTTGGGAGAGGCGAAGGTCGAGAGCCAAGCATCCTCTGAAA  
CACAACTGTCCAAGCGACACTGCTTCTTACACACTGCTCGCTTAAACCCGGAAGCCAGCCGACCAATGTGTGCGAGGA  
AACACTGTACAGCTGGCGACCGAAGTCAAGCTGACGTCGTCGCGCCGCGCCAGGAGTCACTAGAGTGGCGACGGACAAG  
GACATCCGAGCCGGCCAAACCTTCCCTAAGCCGGACGAGCAGCTGGGCCAATTTGTTGTCGCCCTCATGTTCTGGAACCT  
GATCTGTAGGGATGCCTTAGCCTACAGTACAGTGCCTTAGACCCTGTGCCACTCGGGAGGCCCCGATTGATAATAA  
AAAAACCATTAACCTGCTTGTGAGTGCATCAAGTACATATAAGTGCCTTGCAAAAGTATTATACCCCTTGTATTTCCG  
TCACATTTTATTTGTTAAAAGTGGGATTAAAATGATTTAATTGCTGAGTTGTTAAAATACTCTAATGTCAAATG  
ATATGATGATATATGATTTTTTTTATGACTAACCCTTCTGTCCCCCATACATACGACATCTGTAAGGTCCCTCAGTC  
ATGATTTGAATATCAAGCAGATTTCAACTACAAAGACCAAGGATCTTTTTGAAAGAAGGGCAGTGTGGTAGATGGGT  
AACAACTCAACACAGACATGAAATCTCTTTAAAGCATGGTCAAGTATTAATTATGCTGTGGAATATGATTAACCA  
CCCAGATACATTAATAATACAGTCTGCTTCTGAACGAGTGTGCAAGACAGGAATGAACTCTTCAGGATGTTTACCATG  
AGGCCATTTGGTGTGTAATAACTTACTGAGTTTTAATGGCTGTGACGGGAGAAAACTGAGGATGGATCAACAACATTTG  
CGTGACACAGACGGGCTTAAATACCATCTAATAACTAAAATAGAACACAGGTGCAACAAAATAAGGCAAAACCAACAGAA  
AAGGAAAAAGGGATCGGTGGCAGCTAGTAGGCCGGTGCAGACACCGCGAGTGCACCCGAAACAGGGAGACACAGTGT  
AATACATACTATAAACTCAGGGAGCTGAATACTTATGCAACGACTATATTTTTGTTGTTTAAATTTCTATCAATCTTTCCA  
AAACAATAGATAGAAATCTCCACTTTAAACATTAGAGTACTTTGTGTAGATTGTTGACAATTAATCCATTTGAATCCCC  
CTTTGTAACAACAAAATGTGAATAAAATCCAAGGGATGAATCTTTTGCAAGTGCCTAATAATTTGTGGTTTGAAGTACTTT  
CTGAATTCCTGTTCAACTGCTTTATAAGGGCTCCCGAGTGGCGCAGTGGTCTTAGGCCTTAGGCATCTCAGTGCAGAGGG  
TCACTACAGACCCTGGTGTGATTCCAGGCTGTATCACATCCGACGTAATTGGGAGTCCCATAGGGCGGCGCACAAATGG  
CCCAGCTGCTGTGGTTTGGCCGTGTAAGCCGTCATTGTAATANNNNNNNNNNNNNNNNNNNNNNNNNNNNNNNNNNNNN  
NNNNNNNNNNNNNNNNNNNNNNNNNNNNNNNNNNNNNNNNNNNNNNNNNNNNNNNNNNNNNNNNNNNNNNNNNN  
ACGCAATGCATTCGGAAAAGTATTCAGACTCCTTACTTCCCATGTTGTTTACATTAACAGCCTGTTTAAAAATGA  
TTACACCGTTTTTTCTTATCAATCTACCCACAATACCCATAATGACAAACCAAAAATAGGTTGACATTTTGAATG

TATTAATAAACTCAAGTATTAGACCCCTTTACTCAGTACTTAATAAAAGCACCTTTGGCAGCGATTACAGCCTCAA  
 GTCTTCTTGGGATGACGCTACAAGCTTGGCACACCTGTATTTGGGGAGTTCCTCCTATTCTTCTCTGAAGATCCTCTCA  
 AGCTCTGTCCAGGTTGGATGGGAGCATTACTGAACAGCTATTTTTCAGGCTCTCCAGAGATGTTCCGATCGGGTTCAAGTT  
 CAGGCTCTGGCTAGGCACTCAAGGACATTAGAGACTTGTCCTGAAGCCATTCCCTGCCGTGTCTTTGGTGTGTGGCTTAG  
 GGTCAATTGTCTGTGGAAGGTTAACCTTGAGCGCTCTAGAGCAGGTTTTCATCAAGGATCTCTCTGTACTTTGCAACGT  
 TCATATTTCCCTAGATCTGACTAGTCTCCAGTCCCTCCTGCTGAAAAACATCCCCACAGCATGATGCTGCCACCACCA  
 TGCTTACCCTTAGGATGTTGCCAGGTTTCCCTCCAGACATGATGCTTGGCATTCGCGCAAGAGTTCCATCTTGGTTTC  
 CTCAGACCAGAGAATGTTGTTTCTCATGGTCTGAGAGTCCTTTAGGGCCCTTTTGGCAAACCTCCAAGCGGGCTGTCATGT  
 GCCTTTTACTGAGCAGGGGCTTCTGTCTGGCCACTTATCATAAAGGCTGATTTGGCGGAGTGTGCAGAGATGTTGTCT  
 CTGGAAGGTTCTCATCTCCACAGAACTCTTGAGCTCTGTCCAGAGTGACCATCAGGTTCTTGATCACCTCCCGTACCT  
 AGGCCCTTCTCCCTGATTGTTCAGTTTGGCCAGGCCCTGAGGAAGAGTCTTGGCTGGTCCAAACTTCTTCCATTTAA  
 GAATGATGGAGGCCACTGTGTTCTTGGGGACCTTCAAAGCTGCAGACATGTTTTGGTACCCTTCCCCAGATATATGCCTC  
 GACACAACCTTGTCTCTGAGCTCTACGGCCATTTCCCTTGTCTCATGGTTTGGTTTTTGGCTCTGAAATGCACTGTCAAT  
 TGTGGACCTTACATAGACAGTGTGTCCTTTCCAAATCATGTCCAATTAATTGAATTTACCACAGGTGGACTCCAATCA  
 AGTTGTAGAAAACATCTCAAGGATGATCAATGAAAATAGGATGCATCTGAGCTCAATTTGAGTCTCATAGCAAAAGGGTCT  
 GAATACTTATGTAATAAGGATTTCTTGTTTTTATTTAATAAATGTACACAATTTCTACAACATGTTTAAATTT  
 GGTCAATATGGGTTGCTGTGTGTAGATTGATGAGGAAAAAATAATTAATCAATATTAAGATAAGGCTGAACGTAAAC  
 AAAATATGAAAAAGGAAGTGGTCTGAATACTTTCTGAATCAGCTGTATATAAACCCCTGGATGGAAAATGCTATATATT  
 GGGCAATGAGACTTTTGAAGCCACTGGTCCGCCATATTGGCACTCCACAGAAGGAATCCTCCAAGGAAATGAATGGATTT  
 CTACAGTATTTGAGTTAAATGTATCAAGGACAGAATTACATGCATACGATTTTTGTTGTTGTAGTGGGAAAGGAACATG  
 AGTACTTTCAAAAATGATACTTTAAGGATATATCTTTTAAATATATAAACGATGTTAACTCACATAATATAATTGT  
 AAAGTATGATTAAGATGTTGTGTAAGAATACAGTGGGAAAAAAGTGTTTAGACATTAATAAATGCATTTCTATAGCT  
 TCCAAAATGTATTTTCTACTGTGGTGGGTCGGTCCCAAGATGTAGGCGGGTGGCTTCAAACCTGTGCCCCTGGGAG  
 TCTTCTAGTGTAATTAATAAGAACTGGATTTGATCGATGAAGCAGTTCTCATGTATTTCAATAAGACATACTTTTTTCT  
 ATTAGCAAGGTTTGATTTGACAGAAGGTTGTGCTGTGCTGCTTACAAAGTAGTTGGTTCACCTTTGACTTTAGCTTAAC  
 GGGTAGCTCGCTAGATAAATATTTAGATAGCAAATGATTTGACAGTTGGGTTTGTAGTGGTGGTGGTGGTGGTGGTGGTGG  
 TAGCAGCATTTGCAAGCTAGCTAATGCAGCAACTGGTGGTGTGATGCATGGACTGAACAGTAGTCTCGTTGCAGCTGGATAGC  
 ACAACAGAATGGAACCTTGTCTCTGACAATAGTTTATCAAGCAAGGCAAGTGTGATAACATTAATTAATTTTGGCAGT  
 TGTGGCTGTAGACAGACGATACAGGAGGGTGTGTTAAAAAATAATTTAGCTGTAACGTTAGTTTGGCAGGTTAGTTAAAT  
 GTTAGCTAATAATTGCAAGTTGATTAATGTTGGCTATTTGTGCTAGTTAGTTAACGTAACATGACTGAGTAAGGCTAA  
 GTTTGTAACTATACTAAATAGCTTCTAGTCTAGATATAACAACAGCAGCTAACAACAAGCCACTATCCAGACAGAT  
 CGAAAATATGGCTAAGTTTACTTAACTAACTAACTAACTAACTAACTAACTAACTAACTAACTAACTAACTAACTAACT  
 TGCCAGACAGAATTTCAAATGAGACGATGTAGCTAGCTAATGCATCCATTAATAATTTGCAACGTTTATACCGA  
 CAGCTTTGCAAATGAAAATGCCATGAAATGCAATTGCACTGTTTTAACGTAATTAACTAACGTTAGTACGCTACTATTC  
 AAAGTACATTAATAGACATCTTGTGTGATGCAATTTTCAAGATAATGCTTAGCATTGAACAGTTTAACTCTATTGGTATTC  
 AATGATCTTGTGTGATGTTTTGTTTTACAGAGCACAATCCATGGAGCAGCCGACATTAATACCAGTTCAAATATGGACCG  
 AATGATGATACGGAACGATTTGTTGTGAGTTGTTATAACAGAGTTGAGTCTAGCAAGCCAGAACATCTGATGAATAACA  
 AGCGTTGCAAGTGAACACCTACATAGCAGCTTACAGCTACGCTTGGTCTGTCTGTGTGCGTGGAGTGCCTATGGCGGA  
 GTTTGGAGAGAACGACGGCTCATCTCCATCGACTACTGGGGATTCGGTGGCTTTGCCCAGTGATAAAACAGACGGGAAGA  
 CGCAGTGCAGAGTATCGGTCTTCAATGGGGACTGTGGGATACCGGCAGACATGGTTGGATCAGAAAACGTTACCTGACAGC  
 CCAGGGCTTGAACGGCTAACAACCTCCTCTGTGGGTTGGATTCCAATCCGGAATACCACGCAGGAGCAGCATTATAAAA  
 GGTAAAGCATATTTGATGACAGATTTACACAGATTTGAGAACAAAAAGAGGTCCATGGTGGCTAGATTTGTAGCTTA  
 GTGGATGCATCTTAGATTTGATCTTCCACTAAGTGTACATGTTATGCATTTGTTTTCAGCAACCTCGACCAATGAGCA  
 CTTTCAATCCAAAACCACTTTCCACATACATTAACAGATGCAACAGTCAAGGTTAAGAGTCAAGGTTTGTCTGAATTT  
 CATTGCAAGTGTCAATTCACCATTCAGAGAAAATTAAGTAACCTTCTGTGTGTGCTCATGGTAAATATCTACACTATTT  
 TGACTGAATTTGGTTAGGCTACTACTAGGAGGGGATAAACTACGTTATCAGATTGAGTGTTTTTCTTATAAAAATAGCC  
 TAGGCCAAGTCCCTCACTGACTAATGAAATGAAATGAAATGAAATGAAATGAAATGAAATGAAATGAAATGAAATGAAAT  
 TAGTATGGGCCAACATGTCTAGGCTACAGGCATTTTACAAGACGTTCTGTTCTGTCTGTTCTTTTGGAAAGCATTTG  
 CTTGAGTGTCTTGCATAACTGAATTTGGAGACCAAGTGTCCGTTTGGCCATCTTCAAGCAACATTTTGGAGGGCT  
 TGACGTTTACCATATTTGCCATTTCCAAATTTGGGAAAGTCCGGACCAATTTCTGTGGTTAAGAACAGTTTCCAAGTTAA  
 ATTTGGTGGCATTGTTGCTTCTGAACATTTGGTTTTGGTAAGCAGTTTACATCATGAGACAAGGCTTTTCTCATTAAAGAC  
 CTCTCAGCTTTGAATCCGTTGTCTTAAATTTAGATAGTGTGTGTCAGTTGACCTCAATATTAGCCAACAACAGATGGCCTC  
 ATGAAAGAAATTTATGCATTCACCTATTTCTCATATTGACTGTGTGCAAGGTTGTTGACTTGTTTTTCCCCGAAAGTGAA  
 GGCTACAAATCCCTAAATAGGCCTACAATTTGCATCAAGTGTAGCCTAGGTTTTCAGACTGAGGCTATCACATTGCTA  
 AACTCACAGCTTTTTTGTATTTCTCTTATTGCTGCTCACTAGGCAGGTTTCCATTGCTTTTGTGTAATAAACCCTGGGTCA  
 ATGTCGCAAAAAAAACATGGCGACTTGTAAATGGAACCGCAGCTATCGAAGAAATGTTCTAAAGATCAACAACATTTTCT  
 ATCCATTCAACGGGTGATTTGTCTTGTCAAACCTTTCTCATATTGTAAGAAATGATGATGGAACAGTTTCTCAGAATAAAA  
 TGAATAATTGAAGTACTCTGGGCAGTGAAGTCAACGTAACATAAAAGCTTCACTACACATTTTAATTTCAAATGTCT  
 ACTGCTTGCAAAATCAATTTTTCCCCCACTATAAAATGTTTATTTGCAGAACAAGGATTTGCTTGGCTTCAAGAATGC  
 CTGAATGTTTTGCTTGGTTTTTCTGGTTGGCTGGATGCAAGTTTTTACAATCCAATTAATTTTCAAGCTCTACAGGAGTGCA  
 GTTTCACAATAGCACAGACATGGCGATACATTGGCACGTGAGAATTAATGAAATATGGCAAAGATGAGTCAATTTCTGCT  
 ATTTATCCATCTGGCTTTTGGCGGCTACCTGAGACATGAAACATACTGTAGTGGGAAAGGCATACAGACTGTCCATTT  
 TATTAATCGCAATTTCCCTAAATGGATCATGGAACAGTCAACAACACTTTTTTTTTAATTTGGCAGTCAAGGTTTTTGG  
 AACATTTGTAATTTTTTGGTGGAGGGGTTGACGTCATTACGTTTTTTTTTGTCCACAAGACAGTTCAGTAGAACAACAAAGCAG  
 TGTGTTGCAATTTCTATGCAAACCTTATAAATGTCAACCAAAAATTTGCTGGACAAGTAAATGGAATGGCTTATGTAGGCC  
 TAGGCTATCCCATATGCTATGGATCTTTTGTATTTTAAAGTGGTATGGCTTACACTCTAGCCCAGGATGAGCAACT  
 CCAGTCTGTGTGGCTGATTTGGTGTACATTTTTGCCCCAGCTAACACACCTGGCTCCAATAATCAACTAATGATCTTT  
 AGTTTAGAATGCAATTAGTTTAAATCAGATGTTTGTAGGGTTTGGGGAAAAGTGTGACAACCTCTTTGGCCCCCTGAG  
 GACTGGAGTTGCCCATCCCTGCTCTAGCCCTTTAGTGATAAATGTATCAGATCTGCAAGTCTACTGTGTAGCCTTATGA

ATGGATAGTCCACACTGTGACCAAAGTTGCATCAATATTTTACACCAGCTAATTTCTGGACCAACTGTAGATGAGGCTC  
TCAATCAACTATGTTATTTCATTGTGAGCCTTTTCATTGTGTATTGTTGATTTGCCAGCAATGAACACGGTTCCTTCCAG  
TTAAGCTCTTTTCCAAGCCAGGTTTTGTGGGCAGCATTCTTGGCACATTTGAAAGCGTTGAACCTTTGATCCTCTCTCTC  
CTGGAGATTTGATGAGGAAATATTGACATTTCTGCCATGTTAAAGTTTCAAGTAATCTCTCGACCACACAAGGACCTGTC  
TCACTTCCCAGCTGTGAAAAACGATTTATTTTATCTGATGTTCCACTCCTGTGACTCAATGTTCAATATCCTCTGTTTTAA  
TAGGTCAATTATGTCTATTGAAATGTATTGGAGAGCAGAGAAATCTGTATTTACCCCTCAAGATTTACTGCACATACTT  
TCACTCACCTAGCTCTTGGTTGGTCCAGGAAGCCCACATTTAGGAACTCTTTGTGTCAACAACCTCTCATTACTATTG  
AACAAAGCTTAATGCACTTGTGCGTGAAGAAGTACTGCTGTTCGAAGGTAGTCTACTGCCAAAGGATCCACTCAGCAAATG  
ATCACATTTTAAAATGTATTTTATTTCACCTTTATTTAACCAGGTAGGTCAGTTGAGAACAAGTTCTCATTTACAACCTGC  
GACCTGGCCAAAGATAAAGCAAAGCAGTGTGACAAAAACAACAACAGAGTTACACATGGTATAAAACAAATGTACAGTCA  
ACTATAGAAAAATATGTATACAGTGTGTGCAAAATGAAAGTAAAGGAGTTAAGCAATAAAATAGGCCAAATAGTGGTGAAGTAA  
TTACAATTTAGCAATTTACGCTGGAGTGTATATGTGCAGATGAGGATGTGCAAGTAGAAATACTGGTGTGCAAAAAGAGC  
AGAAAACAAAATATGGGGATGAGGTAGGTAGGTAGTTGGTGGATGGCTATTTACAGATGGGTGTGTACAGCTGCAGC  
GATCGGTAAGCTGCTCTGACAGCTGACGCTTAAAGTTAGTGAGGGCGATATATAAGTCTCCAACCTCAGTTTTTTATTTT  
TTATTTTGTGCAATTCATTCCAGTCAATTGGCAGCAGAGAACTGGAAGGAAAAGGCGCCAAAGGAGGTTGTTGGCTTTGG  
GGATGACCTGTGAAATATACCTGCTGGAGCGTGTGCTACGGTTGGTGTGCTATGGTGACCAGTGAGCTGAGATAAGGC  
GGAGCTTTACCTAGCAAGACTTATAGATGACCTGGAGCCAGTCGGTTGGGCGACGAAATATGTTATCGAGGACCAGCCAAAC  
GAGACATAACAGGTCAGGTGGTGTGTATGGGCTTGGTGCACAAAACGGATGCCACTGTGATAGACTGCATCCA  
ATTTGCTGAGTAGTGTGGAGGTTAATTTGTAATGACATCGCTGAAGTCAAGGATCCGTAGGATAGTCAGTTTTTCGAG  
GGTATGTTTGGTAGCATGAGTGAAGGAGGCTTTGTTGCGAAAATAGGAAGCCGATTTCAAACCTGTAACCTTTGGATTGGAGA  
TGCTTAATGTCAGTCTGGAAGGAGAGTTTACAGTCTAGCCAGACACCTAGAATTTGTGGAACAATAAAATACCTAAGTC  
AGAACCATCCAGAGTAGTGTAGTGTGCGGGCCGGGTGCGGGCAGCGATCGGTTGAAGAGCATAACCTTTTCGATTTTAC  
TAGCAGTTGGAGCCACGGAAGTAGTGTGTGATGCGCTTGAAGTCTGTTGGAGTTGTAAACCCGTGTCCAAGGAAG  
GGCCAGATGTATACGAATGTTGTCTCAGTGTAGGTTGATCAAAGTATCACCCGACGACAGCGCATCTATTGATA  
TATAGATGGATGGATGGATGATAGATGGATAAAAGAGTCGGCCCAAGAAATTTAACCCTGTTGGCACCCCATAGAGACTG  
CCAGAGGTCCGGACAACAGGCCCTTCCGATTTGACACACTGAACTCTATCTGAGAAGTGTAGTGAACAGGGCGAGGCGAG  
TCATTAGAGAAACCAAGGCTTTTTGAGTCTGCCGATAAGAATACGGTGAATGACAGAGTCGAAAGCCTTGGCCAGGTTCGAT  
GAAGACGGCTGCACATGTGGCTTACCACCAATGTCCCAAAATGCAATAAGGGACTGTAAGACTACACAATGACAGCCTTCT  
CTGCCAGCCTTGACAAGTTGGTATAATAACAACACTGGTCCATATGCAAAATCAATATTTGGGCAATTTCCAGGCTAATCAT  
GCTGGTCTGTCAGCAGACTTAAATGGACAACCTCCATTTAGTAGCAGTGGGTTCTGCTACAGGTTCTGGACCTGTTC  
ATAACTGTGTAGCCATATTACAGCTCACATCTCTCCACTTCCACTTCCACTTACACTGTAGCTTGCAAAATATGTCAGA  
GTGAATAGAAAGTGATACCACCATGCTTTTTAGAAATGACTGAATAAAAAATAAAACGCAACATGCAATAATTTCAA  
GATTTACTGAGTTACAGTTTCAATAAAGAAATCAGTCAATTTAAATACATTCAATATGCCCATAATCTATGGATTTTACA  
TGACTGGGAATACAGATATGCATCTGTTGGTACCAGTACAGTACCCTTAAAAAAATAAAATAAAAGATAGTGGTGTGGA  
TCAGAAAACAGTCAGTATCTGGTGTGATCACCATTGGCTCATGACAGCGTGACACATCTTTCTCATATAGTTGATCAG  
CTGTTGATTGTGGCTGTGGATTGTGGCCACTTTCACTTTCTGTCTCACACTCATAAAATGACTGCTGATTTTCAACTG  
TATTATGGAGCGCAATCCCATTGCACAAGGTGAAGTTTTCTCTTCAATTTTTTAACTTTTGAAGTCAACATGTTTT  
TACATTTAGATTATTTACTCAACAAATTTTCACTGAGAGAGCAGCTTGTGTGGAACGGGTAAAGATATTTGTTTACATGT  
TTGATTTGGTCAGATAAGTGCAGGCTTGTGGTAATGGCTGGAGTAGAATAAGTGAAGTGGTATCAAATACGTCAAACGCAT  
CGTTTCCATGTGTTTATGCTATTCCATTTGCTTCCGTTCGGCCATTATTATGCCCTCCTGTGATGTGGGAGAGAGCGGG  
GTGAGGATGGAGGGCGCTTGACATGAAGCACTGAACATCATGATGTGAATTGGAATGTGTTAGGATATTACATGCATTA  
TTACAGAATGATGCCACAGAAATGTGAATAATTTTAGAACATGGAACAAGGAAAAACATTTAACCAGGTTCTTAAGAT  
TTGAAAATAATGGTTCTGTCCCGAACAACACTAGATACACTTTTTGTTTTCTGTTCTCAAATGGTTTTGTTCTTTTTCTTT  
CTTTTTTTTTTTTAAAAAAGGTTCCAAATCCCTGACTTAATATAAATAACCTACTTCTCTACTAAAGCAGATTTGTTCTG  
CAGTGATGAGAGGATGTGGTGCAGCAGTGGTGAAGAAGTACCCAATTTGTACTACTTATGTAAAAGTAAAGATGTCTTAAA  
AGAAAACACTCAAGTGAATGTCACTTAGCCTAATAGTTTAAAATATCTGTTCAAGTTTGGACAACCTTTGAAAATGA  
CTGATTTTGAATGATTTGAATGAACCTATGGCTAAAATCAATTTTTTTTACAGTTAGTTCACTTAAAGAAGTCCCTCCATTG  
TTTGTATGGCTATTAATTTCTTTCTATATCTTGTGGCCAAACACAGCTCAGAGCATGTCCCTGATTAGTGTATCATCCAAG  
CAAAATGTAGGCCAGGATTTTCCAACTGTCCACTGCAAAATAAATCAGTCTTCTGATCTGGTCCAGGCAGAAAAGT  
AGCAATACATTTCTTTCCAATTAGATGCTCCTTATTCTCAAGGGGAGCCTTATACGTACTACTTAGTTAGGAAATAC  
CTTGACAGCAATTAATTTTTTCTCCCTTTTCTCAAGATCAGGGTTATTTCGTGATATTGAGTAGTTTACATGACACAATCCT  
ACACCAGTTTATGATGCCTGATATTTCTTGCACCCTAGTGCTAACCAAAACCCAGTTGAATGTGAAATGTCAGTGGTCTCA  
TAGACTAGACGTAACATGGTAAATGTAATCCTGGACACTGAAATTTGGAATGGTATGTACATTTGCTTTGGTTACATAA  
GACGGAAAGATTTAGGGAAGAAATGAAAGGAGGTTTTGTATGGTCCGGGTTGGGTGATAACGTGAATGTCTAGCAACC  
CAAAGGTTGTGTGTTGCAATCTCATAATTTATCATTTTAGCTAAAATTTGAGATTTTGTACTACTTACTACTTTTAGCT  
ACTTTGCAACTACTTAGCATGTTAGCTAACCTTTCTTCAACCTTAACCTTTTCTAGCTAGCCCTAACCTAACCTAACCT  
TTGACCCCTAACACTTAGCAACCCAAAGGTTGTGTGCAATCTCATCAAGGACAATTTTTAGTTAATTAACAACATTGCAT  
GTTAGCTAACGCTTTTCTAACCTTAACCTTTTAGCTAACCTAACCTAACCTAACCTTAGCCCTAACCTTGACCCCTAACCTC  
TAGCCCTTAGCCACTAACCTTAACGTTAGCCATAACAATTTGGAATTCGTAACATATCCTACATTTGGAAAATATGTA  
ATTTGACGAATTGCAATTTGTAACATATACGAAATGGATGATGGACATCCACAAAATAATAAATGCCATACGAAACATTA  
CATATCATACTAAATGCAGTGTCTCAGAATTTGATGCACAGAATAATACAAAAATGCTCTGAGACTAGGTTGGAAAATGTCT  
GGTGTGTGGCTGCTATTACGGATGGGCATTAGAATAAATTTCTACTCAAAATATCATGATTTCTTCCCCCTCAAATAT  
CATGATTTCTTTCCCTACATGTTTTAATCTGAGCCTTGCCGAGTGGGAGACGAAAGAGGTTCCACTATGATGATGCTG  
CTGCTACAGCAGTAGGCAGAGGAGGTTTTGTTGTTGTGAGTGTGAGATGGAGAGAGACAGACTAGAAAATAGCCACGCTG  
GCTCATGCTAGTTAGTTAACCAGCAGCTAATTTTATGTTTATCTATCAGCCATAACAGTGCCTGCTTACTTACTTAGGGC  
TGGCGGTATACCGGTATTGATGCACGGACAGTTTTGGGTTTTTACGTTACCTTCTATAACGGTGGTTTGAATGTTTGGT  
TGTAAAATGTGATATAGTTTACAAGCTACTTTAGTCATCTTTCTCAGCTCTCTCTCCATGTCTGCTATCCACACAGACCT  
AGCCCCGCCCTGTCTCAAGGTGCAAAATTTGTTGTTCCTCGACCAGGACACTTGGCTCAGTCTGCATGGTCAAT  
GCAGAGCATGCAACAATGTTGATGACAATGATGCTGTTTTGCTTTTAAATATAAATCTATAATACACTATTAG



CTGCAAATGAGTAGTAAGCCCAAAATATATTTGTATTTGAAAACAGTTTTGTACCTGATTTTTATATGACCCGATCA  
 CATCTCTTTTATTTTGTGGGAATACTTGCATATACATTTTAACTGAATTCCTGGTGATTTAAGTATGTTTTCGAGAAAAAC  
 TGAATTCCTTGGTGAATAGTCTTGTGTTTTTTTTTACAAAAAATCCTTGGGGGGGGGAATCACTCACAGGCT  
 GGTTTTGGCCCATGGATGCCTGTCCACGCCCTGCCATACATCTCAAGAGTTTTGCCAGGATATGACAACGTTCGA  
 TAGCGTACATTTTTGCTCAGTCTGCAGTACCAGGCTGCAATGTAGGCTAGTCAATCTCAACACCGCCGGCATCTTTTGAT  
 CTGTGATTGAATGTAGAAAGGCAGTCACTGTCACGACGCATTGGCATTGTAAGTACTGTAGAACTTTAGTACAATATTGATC  
 TCACAAGATTTCTCTTCTCACATCCTAATTTGTTTCATGATTGGCATAATAGATTTCTTTGACCTGACCACATTTCTCTGT  
 CCCAGCACCATTTCTCTCTCTCTGTTTGACCTTTGGTCTCTTCCAGCTATGCAGCCGATAAATCAGCAAAACCGTAATCAC  
 AAAGTTATGCAGGCTTTGGGCATCTTGATACCCTTGCCAAAAAATAAACAGTAGGGCCTCATTTTATTACAGTGCAGT  
 ACTGTGGTGTAAAGAAGCCTTCCAGCAGGATGAGTTAGGCTAGTCTCATTAAGATGCTGAACATATTTGAAGTGCTCA  
 CTCTCTTTCATGGATATATATTGTGTACACGACACCTATGATTTATGCTGCTTCTTTAAAGTGATTTTTGGTA  
 AGAGTCCGATGAATTGTGGATACCATGTTTATGTCTGTCCAGTATGAAGGAAGTGAGGCAGTTTTGTGAGCCAATGCTA  
 ACTAGTGTAGCACAATGACGAAGTCTATGGGGATCTGCTAGCATGGGTTGGACCTATGCAATACGATGACTGCACAT  
 TTTGCCCTTACTTCCGGATCCAGTCTATACTGTTTTGAATGAGCTTAAAGATTATAAATCAAATTAATGAAAACACG  
 GTCATTTGAGATGTTTTATATGAATTTATATTTGTTGGATTAATTTACTTCTACCTAATACATTTTATAAAGATTTTTGAT  
 TCATATCTTATTTTTTTCTTTGCTTGAAGACCATTGAATAAACGGAGGTGGTCCACTTTCCCATCGTAAAGCGATGT  
 TACTGTATATTGCATAGGTCTACCTTTCATTACCATATTGGCTATTGTTTTCTCAAATAACATTTATAGTCTAATAC  
 AAATCTGGTTCAGGTACAGATTAAGAGGGTTCCATAATGAGGCCAGGCTCAACATTAACGCTTGTCTTTGTCAGGA  
 CAACTTGAATCTGAGCGAGGGCTCAGCATTTTAAAACTATTTAATCATAATTGTTTAAAACTGGATGTTTTATGTCA  
 TTTTATGAAGCATGTATTACCTTTTTCAAAGTAGCGTACAGTACAATTCAGCCTTTTTATAAATGTTGAGGAATTATTT  
 TATAAACTTAACATGCTATTGAAACCAGCATTTTCTCATGTTCTGTTTTTTTTTTAAATCTATTTGTTTTATTGT  
 CAGCAGCCAAAGGCATAAATCCTAGTTCATAGTTTTTGAAGCAGCGTTTTCCCTCTAATTGCATTTTGGAACATTGCGCG  
 TCGCTACAGCCATGTGTCTTTGGTGAATATAATAAATAAATAAACATTAACATTTTTTTGTAAGCTAAACG  
 ATCTCATCTGTCTCTCCAGAAGTGTCCCAGAGCCGTTTTGAACCAATACACATTTGTTTTATCACCTCAAATTTGCA  
 GCCCTGGAGGAACCTATTTTATAAGGCATAAAAAAGTATTTGATTGTAATGTTGCAATATTTTATAGGCTACCAAGAGTGG  
 CCAACCATCCTCAGGAGAGCGTTAAAGAGCCATCCTTCAGGAGAGCGTGTCTATTTTTGAGACAGGCTGGAATATGCAA  
 AGAAGCAATATGCAGACAGTAGCCTACATTTTTGCTGACTAATGCATTTTCATTTTTGTAAGTGGTTTTCTTGTCATCATA  
 CAGGGATGTAATAAAGTTTACAGTACTAAATCAGTAATCCAAGGACAAGTATCTAAAATAGTTCATGTCGAAAGCCCTT  
 ATGTGGGTCTACCCCAACAGGTGGTCGCAAAAGTTCCCTGGTGGGTCACAGGACCTCTTTGATTTGGGCGGGGGA  
 CATTTTTCTAATTGGAAAAATAAACCTGGATTTAAGACTCAAGCCTCTTGTAGACTAGCTAGTGAAGTGTCTGTGTA  
 AGTGTCTTAGCTTCTCACACACTAGTGATGATCCATTGATTGCATCAACTCAATCAGACTCTGTGTGAGGAGTGCATC  
 AGGGATGACTGGAGCTAAATCAATCAATGTTGGATTTGGGAGCTTCAGGGGCTCTATCGACGCTCTGCAGCTGCAGCAG  
 TTCCTCTGACTGTCTGTCTCTGTTTGTGTCATGCCGTGCTGATTGGTAAACCAGCTTGGCCCTTTGTCATTTCTGCTTC  
 CTAAGCTCAGTATATGTTCACTCAAGGGGTGTATGTTGCTTATGAAATAAGAAGTGAATGGTGTAGTGCAGTGTTCCTC  
 AAATCTCCACGGGACCAAGAGGTGCACATTTTGGTTTTTGCCCTAGCCTACAGGCTGATTCAAATAATCATCAAG  
 CTTTGATTTATTTGAATCAACTGTGTAGTGTAGGCAAAAATAACCTACACCTTACCCCTTGGGTCCTCCGAGGACAGATTT  
 GGAACAACAAAGGATGTAGTGAATGGCCAAATTCAGGGGTTGGTAATTGCTTAGTCTTAGAACACTTCCAGTCCACA  
 TGTGAATTTATGTATCGCTATAGTCAATGTTTTTGAAGTAGTGTGAACATAATTGAAATGGGCAATCTGAATACTGCAGT  
 AGAAAAGAACCAGGCCAGATAATTACCACAACAGGTATGCTTTGTCGTTGTTGAGGCACCCAGTGAAGGAGCCACCAGG  
 TGTTTTGGAGATGCTGTGTGTTTTACTGTTTTTGTGTAGTTCACTTTTTGGATTGCAATTTCTTTCCACCAGGATGAGCTA  
 CTGAATATTAGGGACAAGTTACCAGGTGGTTTTTGTCTGAGATTTCTGCTCATCCGACGATATACTGCTGAAAACCC  
 AGACCACGAGTCAGATTTCTGAGGCTATGCGACTGTCTTTGGAGAAAAGAGGGGGAGATGCGCCAGGGTTGAAGGTGAGG  
 TCTCGTTTTCTCTCCTAGGTCATTTCTCCTCAATGTGCATTTACTCAGTCACTCAAAATCGACATGCTACAACCTCTGAT  
 TAGAACAAAAAGGACTTCTGTCACTTCTGCTTCACTGGATCTGAACTTTGCTTAAATGACGACACACCTGAAGTCTGTGGATA  
 TACCAGGCTTCCAGCAATACTGGGCTGATGGTGTCCAGATCTGTGCAAAAAATCCTAAGGTGGCGCTGTATGCTTTTAC  
 GTCAAAACAACGTTGGTGAATGATGTCACTTTACTGGCGAAATCTTTATATCTGACTTGAAGTGTATTTCATCAACTG  
 CCATCTGTTTTAGTACCACGCTCCCTCGCCCCCTGGTTTTTGGGGTCCGGGGTCCCTCCAGATAATTATGTATAAGGAC  
 TTTTTATCAGGACATTTCTATTTCAAATGAATGAAAAAATAAATGATGCTGACACTTCAAATATAATGTCTCTCTCTA  
 GAAATTAATCAATTACATAATGGGTTTTTTGTTACAAATTAATTTAAATGATTTGACCATACAAATAGCCATGCATGGTC  
 CATATTATCAGGTATGCTAATAGCAATAAGCAATAATACCTGTAGTTGGGGCTGTTGGCGTACTGTATACGCCACAC  
 CGGTGGTGCAGTATGAAGGCAGTACAGAGTCTACGTGACCATTTAGTACCGTAAATAGGCTTCTCCTGCTCTGATG  
 CTGCTGATGGTCAATTAGTACCTATCAAACTTGTCTAACTGCCTGGTACTCAGCACTCTTGTCCCTCTAATAACTCTGAC  
 ATCAATGCAAAATGTAATCGAAAATCTAATCAAACACTTTCATGAGAGCCCATGAGCTCATGTTGTGCAATGTTCTATAGG  
 CTATGCAATTCGCTGAGAACAGAGTGATGGCCTCTACTAAAAAGAGGAGGATCCTATCAGCTTTCTATAGGCTAGGCCTA  
 CTATTTTTCTCAACTATTTTCTCAACTTCCCTAATATTAAGCATAATTGCTTATCATTAACAACATGAGTATAGCCTACCT  
 GCTGGCATGAAAATGACCCATGGGAAAAGCAATTCATTTGCTATTTAATAGATTGCATGTTTTTTCCACTGCCCT  
 GTTTTCGAGACAGGTGCATGATTTAATGGTTCAATTTCAATCCAACCAATTTACGCAATATAATATTATTATATGTA  
 GACAAGATTAAATTAAGAATAGGCTAATATTGTACCCCATCAGACTATCATTTGTGAATTATATATTACTGAATGAT  
 GCCAGCATAAGGCAAGAACAATGCCTTTTATTATTTGCGCTTTTCAATCATCTGATGATAGGCTATATGTTT  
 TGAAGTTTGTATCAAACTAAAGTGGCAAAATAACTTCTAAATGAAGCACATTAATCTGCTTTACAAAGGGTGTAGA  
 GCCTAACTGGCATAACAGCAGATGAGTTTTCAAGGTGTTGGGAAGATAATTTTACCATAAAAAATGCACCTTTATAAT  
 AAAAGCATTACATGATCATCGCATTTGCGGTGACTTTTGATAAATGGGGTTTTCCCGCTAATGGAACATTTTGCACTTAT  
 ATCATACTGCCATGCATCATCGCTGCGCTTATAATGAAGAATAAATAAATAAATGTTAAGCTAAACGTTCTGTATC  
 TGTGTCATCAGCCCATTTGTCTAAACGTTTTTTGGGATGCTAGTGGTTGTATTAATTTGGGATCCGAATTTGGATAAGGAG  
 GCGCGCAGTTGCATCCCCGATGTGTCTGTCTCAGTTGTAACCTGTGAGAAAGACCTGATCACGTGATGGAGAGCCATAT  
 GAGTGAACGGTGTTCAGAGCGCGCAACACTCAGGGAGAAGGGCACAACACAGCCTCCGAGCCAAGGGCACAACGGGTG  
 CATTACGGCCACACAAGGGGATGTCGCCGTGAAATTCAGAGCATTAACAAGTGTGTCAAATTTGTGAATGAGAGACTG  
 ATGAAGTGTGTACAGCTGTGCAAAAAAAAAAGCAGAGCTCATACCTTTCAAGCAGCTTTTTTCAAATCATCATACAATGT  
 ATTAATAATCAAACATAAACCCTGTTTGTAGAACAATAAGTTACATTAACAACACTAAATGAATCACAGAGAAG

TACCTATTTCTTTGTTTCACCACCCAACACAGAATAGCCGCATGTGCGCACTCCCTCAAATGTTTTGGAGAAAATATCCTT  
TCAATTTTATTTCAGCTTTGTTCAATTGTATTTTTTTCATACTATGAAATCATATAAAAATATGCCACCGAATTCTAAGCAA  
TCTTGTCGTCTATATGAACTAGTGTAGCCACATCCATTTGGCGTAGCCATGTCAGGACCTAACTTGGCTCTCAGGACA  
TGGGGTAAACATGCCCTGCCTGTACTTCTCACAGAAACCAGTTTACATGTACCATTTCCCCAACACTTTCCCTGGTTCGC  
ACTACTCTTACTCAACCAAAAATTTGCTCACAATTTAAGTCACTACCAAAAATGATTTTTGAGGTAGGGTGGCGTTTTAG  
CCCAAGTTACCCTACAATGCACCATGTTACATTTAGCCCACTCCCTCCCTATGCACATAGTTAATTGCACAAGGCC  
ATGACGCTGCTAAAATCTCCGGGTTTTAAAATGGTGCAGTTTTGCGCATATTTAGTACTTAAGAAACAAAGGCAATTTAAAC  
GGCTGTTTTCCCCTGCATTGCAAGAATTGTTGTGCATGACTGCTTGTGACAATGCAGGTTTTCCCTCCCTATGGCACTCA  
TAACCTGAATGCGCCTTGAGAGGAATATTTATCTTGCATAGAATACACAACAACAAGCCGACTAGGTAATCGATAGATA  
TAACTATTCTACTATGGGATTGCTGTTTTTTCTATTTACATTACTTATTTGTTTTGCAGAGAAAAGTAAATGTGGACTG  
TTCTAGCATCTTTCATATTTTTTTATGTTTCATATTTTAGCGTGGCGTAATGATTTTTGCCACAAAATGACTGCAG  
AGGAAAACACTGTTGCTCCACCTCATCCCTCATAACAGACAGAACTGAAACCTGCAAAACCTGTCAAACATACAGTGAGG  
CAATTTGGGGAGTTAAAGGACTGCCTGGGCTCCACAGATTGGGACATTTTTCAAGGAAGACCATATCAACATGACAACAG  
GACAGGGTAGCATCTTACATCAGTGTCTGTGGAAAACCTGCTTTCCAACCAGTACTTTTTGTCAATTCAAACATGCCAAC  
GCTGGGTCAATCCAGAGCTAAGAGGCCAAAGCTCAGCCAAAGGAGGACACATAGGAGTGGCAACATGGACCATTACAGA  
GTGACCCACCTCCCTACCCCTTGTCAACAGCATCACAACCGTGAAGGAGCTGACAGGCCAGGTTGGTTCCTCCCTGCC  
ACAGTAAAGCACTGCGTACCAGCTCCCTGTATTCACGGACACTTCAATCCATCACTTCAATGCATATGATATGATCTTCC  
TGCTGTCTTGAATCCTACATTGTTCCCGTTCCAAAGAAAATAGAAAATCCTGCCTGAAATTAACAGACACTGTTGCACT  
CACATCAGTCATCATGAAGTCTTCCAGTGCCTTGTCTATCCCACTCAAACCATCACTGACGCCCCTCTTGACCCCC  
TGTTAGTTCCGCTACAGAGCCAACAGGCTGTGTTGATTACGCTGTCAACATTGGCCTCCACTGCATCCTTCAGCACCTTAC  
AACCCAAAGGACATACGTAAGGATAGTGTGTGGACACCATCATCCAGATCTGCTGCAGGACAAAAGAAACTCACCCA  
ACGGAACATACTCAATGGGGCAGTTTTAGAGGCCACTTGGCTGCAGAGACAATGTTGCTGTTTTTAAAGCTAATTTCTCT  
ACGATTCTAATCAGTTTGGCAATGGCAAAGTCAATGGGGGGCCCAATGCCATACATTTTGTGAATTTTGAATTTAGTTCTTATC  
TAGTTTTTATTTTTGGTGATTAGTTTTCAAAAATGATCTTTATTTTAAAAATGATTTGCTCCATTATATTTTCAAAAATAC  
TTAAAACGTATTTTTAGTTGTTAAATTTTACAATGAAAAATTTTACACTAAAAACATAACCGCAGTAGCGCCAGGATTTA  
GCAGCGGTCTGTGCGTTGCTGAATGCATATAGGGGAAACACTGCTTATTCATCGGCCACTGCTCCACATTGATCTTTC  
CCACTCAGTCTATGCACCTGCACCTTTCATACTAGACTGCACATTGCTTTCGCACTGGCTTAGGGCTCTGCTTCAGACT  
GACTCCACATACTGCTGCTTCTGAAAGTGTTCGGACCCCTTACTTTTTCCACAATTTGTTAGGTAACAGCCTTATTTCT  
AAATTGATATATACATTTTTTCTTCAATGATCATAACACACTCCCTGTAATGACAGAGCAAAAACAGGTTTTTGAAAAAT  
GATGCAAATGAAATATCACATTTACAGAAGTATTCAGACTTTCAGACTCTTCTGTTGAAACACTTTGGCAGCGA  
TTACAGCCTCAAGTCTTCTTGGGTATGATGCTACAAGCTTGGCAGTATGTTGTTGGGGAGTTTTCTCCCATCTCTTCTATGCA  
GATCTCTCAAGCTTGTGAGGTTGGATGGGAGCGCTGCTGCACCCTATTTTTAGGCTCTCCAGAGATGTTGCTATCG  
GGTTCAGTCCGGCTCTGGCTGGGCACTCAAGGACATTCAGAGACTTGTCCCGAAGCCACTTCTGCGTGTGTGGCT  
GTGTCTTAGGGCTCTGTCTGTTTGAAGGTAACCTTTCCTCAGTCTGAGGCTGAGGCTGTGAGCAGGTTTTTC  
GTTAAGGATCTCTGATTTTTGCTCCGTTCAATTTTTGCCTCGATTCGACTAGTCTCCAGTCCCTACCAGTGAACA  
TCTTACAGCATGATGCTGCCACCATGCTTCAACATAGGATGGTGTAAAGTTTCTCCACCCATCTTCCACAGTTCAA  
CTTTGTTTTCATCAGACAGAGAAATTTGTTTCTCAGGCTGAGAGTCTTTAGTTGCTTTTTGGCAAACATCAGTAGCAGG  
CTGTCATGTGCTTTTTTATGAGGAGTGGCTTCCGCTGCGCCACTTACCATTAAGGCCTGATTGGTGGAGTGTGCGAGA  
GATGGGTGTCTTCTGAAGGTTCTCTTATCTCCACAGAGGAACTCTGGAGTCTGTGTCAGAGTGACCATCGGGTTCTTGG  
TCACCTCCCTGACCAAGGCCCTTCTCCCTGATTGATCCGTTTTGGCTGGGCGGCCAGCTTAGGAAGATTTTGGTGGT  
CCAACGTCTTCTTTTTAAGAATGGTGGAGGCCACTGTGTTCTTGGGGACCTTCAATGCTGCAGAGATTTTGTCTGAC  
ATCCACTGTCAACTGTGGGACCTAATATAGACAGGTGTGTCCTTTCCAAATCATGTACAAAATCAATGAATTTATCACA  
GGTGGACTCCAATGAAGTTGTAGAAACATCAAGGATGATCAATGGAAACAGGATGCACCTGAGCTCAATGTTGAGTCTCA  
TAGCAAAGGGTCTGAATACTTGTGTAAATAAATTTTTTTTTTTTGAATAAAATTCGCAAAGATTTATTAACCTGT  
TTTCGCTTGTCTATTATGGGGTATTGTGTGTAGATTGCTGAGGATAAAAAAAAAAAAAACACTTTTGAATAATCTGT  
AACGTAGCAAAATGTGAAAAAGTCAAGGGTCTGAATACTTTTCGAATGCACAGTATAGAAACTCAAAAGAAACGTCCC  
TTTTTACAGACCCTGCTTTCAAAGATAATTCGTAAAAATCAAATAACTTCACAGATATTCATTGTAAGTGTTTAAAC  
ACTTTCCCATGTCTTCAATGAACCAATAACAATGAACATGCACCTGTGGAACGGTTGTTAAGCACTAACAGCTTACA  
GACGGTAGGCAATTAAGTACAGTTATGAAAATTAGGACACTAAAGAGGCCCTTCTACTGACTTGAAAAATACCAA  
AGAAAGATGCCAGGTCTGCTGCACTGCGTGAACGTGCCTTAGGCATGTTGCAAGGAGGCATGAGGACTGACATGTGGTCA  
GCAATAAATGCAATGTCCGTACTGTGAGACGCCTAAGACAGCGCTACAGCGAGACAGGACGACAGCTGATTGTCTCTC  
CAGTGGCAGGCCACGTGTAACAACCTGCACAGGATTTGGTACATCCGAACATCACACCTGCGGGACAGGTACAGGATGG  
CAACAACACTGCTCGAGTTACACCAGGAACGCACAATCCCTCCATCAGTGCTTCTGACTGGCCGAATAGGCTGAGAGAG  
GGGTGTGACTGTCCGCAATAGGCTGAGAGAGGCGAGTCTCACAGACATCACCCGCAACAACGTTGCTATGGGC  
ACAAATCCACCGTCTGTTGACACAGAGGACTGGCAAAAAGTGTCTTCACTGACGAGTCTGTTGTTGTTCTCACAGGA  
GTGATGGTGGATTGCTTTTTATGCTCAAAGAAATGAGCGTTACACCGAGGCTGTACTCTGGAGCGGATGAGGTTGGA  
GGTTCCTCATGTTGTTGGGCGGTGTGTCACAGCATCATGGGACTGAGCTTGTGTCATTTGCAGGCAATTCACAACGCTG  
TGCATTACAGGGAAGACATCTCCCTCCCTCATGTGGTACCCTCCCTGCAAGCTCATCTGACATGACCTCCAGCATGAC  
AATGCCACCAGCCACAGCCATACTGCTCGTCTGTGCGTGATTTCTGCAAGACAGGAATGTCAGTGTTCGCCATGGCC  
AGCAGAGAGCCGGATCTCAATCCCATTGAGCAGCATCTGGAACCTGTGGCTCGGAGGTTGAGGGCTAGGGCCATTCCCC  
CCCAGAAATGTCCGGAACTTGACAGGTACCTTGGTGGAAAGGTTGAGGTAACATCTCACAGCAAGAATGGCAAATCTGGT  
GCAATCCATGAGGAGGAGATGCACTGCAGTACTTAATGCAGTGGTGGCCACACCAGATACTGACTGTTACTTTTTGACC  
CCCTTTGTTCCAGGACACATTTTCCATTTCTGTTAGTCACTGTGGAACCTGTTTATGTTATGTTCTGTGGTGGAA  
TGTGTTTATGTTTACAAAAATATGTACACATGTTAAATTTGCTGAAAATAAACGAGTTGACAGTGAAGGATGTTTCTT  
TTTTTGCTGATTTTAACTAACTATTTGCGTCTTATGGTTTTGGGGTAGAAGCTATTCAGGGTCAATGTTGGTTCCA  
GACTTGGTGCATTTGTTACTGATTGCCATGCGGTAGCAGAGAGAACAGTTTATTACTTGGGTGGATGGAGTCTTTGACAA  
ATTTAGGGCCTACTACACAGCTTCAGAGCTGGTGTAGTAGGATTCGATTTTTGGTCTGTATTGACGCTTTGCTGTTT  
ATTGTTGCTTGGAGGGCTTAGCAGGATTTCTAATTAGCGTCCGATTAGTGTCCACTCCTTGAAGCGTCCGGATTAGT  
GTCCACTCCTTGAAGCGGCAGCTCGAGCTTTTACCCTCAGATGTTACTGTAATCATGGCTTCTGGTTGGGATGTGTAC



ATACAGTCAATGTGCTCCTACAAAAATTAAGGATTCAGCTTTATTACCTCAAATGTTTTTGTCTGTCTGTAACCTGTGCA  
CAGCACCATTTTCAGAGTCAAATTCCTGACAAATCAATGTACATGGTGAATGAAGCTGATTCTGATTCAATTTACCCACA  
ATTAACCTTTGCTTAACTAAAGCAGCAGTATTTTGCCATGAACGCTTGCAAATGGGGTCTAGTTCTTTACAGGGAGAGCAG  
CAGAATGAGTTTAACTAAGCCCTCAATTTTGAGAGAGACACCTGATCCTGGAGCTTAAGCAGACGTTGCAATATTTCATT  
TCTGAAAAGACCATGGCTTTAGCTTCAAAAACAGGGTTTTTAAGCTAATTAATATCAGTTCAGGCACACACAATTCAGGAAA  
TGTACTCTATAGCTCCCATGCTAGTTATTTAAATAAAATAAATAAAGGTCAAATAAAAAATAAATAAATAACATGTATTTTT  
ATGGTTGATTTGACTCTTGAGGCTGATACTGAATTACAGTGTGAACAGCTGGGCATTTGTCAGGTTCCCTCAGTGGTATA  
ACAGCTGTGGATTGAAAGTCTTGATTTTTAAGCATTGCCCCATATGTCCACCTAAAACAGGCTTTTTCCCTCATGTTCCCT  
ATATCCAACACCCACCATGTTCCCTAAATATGAAATATTCCTGAAAGCACTGTTTGCCAATGTGATCAACCTGGAAATAG  
CTACCATGAAACATATCTGATATTTGCTGTGACTCTAGCCTATTAATGCATCTAAATCCCTTTTTTATATAGTAAAC  
CTAAGCCAGCATGGCTGACTCTTAATGGCTGTTTTTCAGATGTGCTCTTAAACATGTGACGATGGTCTCAATCTGCTCTGT  
GGATGTGAATGAACCTGGTGGTGGAGGTGAGAGTGGTAGATGAGGTTGTAGTACACAGAGTGGGGGCACGAGCCTTCTC  
CACATAGGGAGGCTTCTTCACGTTATAGTCGGGGGGGGGGAGTTTCAGTCTGGTCCGCAGTCTGGGCTCAGATGTCAAAG  
CCAACTGCTCTTTTCCATTTTGAGCATTGATGTTATGAGACGAGAGCCTGATAAGGGACAAAATGATGAGCAATATCCC  
CTTTATGCTATAATAAGATTTTCCAGGTTACACATTTAGCTGCCAACCTATCTGCGCTTCCTGGAGTTTGTAGTCTGATGAATG  
TCCCTTGGAACATTTATCATTTGAAATGATTAAAGCGTTTTATAAAAAGTCATATCGGTGTTGATGATTCAATAGTATTTAA  
CCTAGCATAGACTAGACTAATATCGATGATCACACTAGCAGCAGTGTGGTGGTCTCTTTGTTGATGCTCAAGACTG  
CTAGCTCTATTCAATGCTCTGGCTGGACTGTTAAAGGGTCCCCTGATTACTTCAGATGTACAGACAGTCTGAACT  
GCTCATTTGAACAGTAAAGGGGTTTTTCAGTCTATTAAAGGAATTCAGAATTCATGAGGGTTTTTGGCAGCCGAACACACT  
CAAATGTAATGCGGGGAGACAAAATACTCTCCAAATCCTCCACGCCACTAAGCCCTGCACAGGTTTTAGCTAGGCCTAT  
GTTATTAATGTATCGAACAATCATGCTCTGTGGTTTTACTTTTTCCAGAAATACCTAGTACAAAATGACTGGAACCTC  
AGGTGTAGACCTTTGCAGAATCTGACCTGCCTACGTATTAGGCTATACATTTGCAAAGGAAATCAGGCTTTGCCAACGC  
AGCCCTATGCGTGATGATAATTTGGCCTGTGTCATTTCTAATACGACAGCACCTCAGATCAGCAGACTCTGGGATTTGT  
CTGGATACAGCATCCTTTCAAAATAACAAAACACTGAGATTTTGTGTTACTTAAAGAAATTTGGGACATTTTATTTATCCAG  
TTAAAATCTATTAATGAAATGGATTGTTGTAACAGTATGCTGGTAATAAAGCAAAAAAGTAAATATCTCTGCTGAGCAAG  
TAGGCTAAATTTAAAACATTGGAGATTGATGTTGGTGTGGTATCGTCCCTAACCAATTATGTTCTTGAGGATTTGTTCCCT  
TTTAGTATCAAGAAATGTTTCTCTTTTCCAGGATAATTTTGGCCTTAAATGAAATCATGTGTAAGTAACTAAAACACCCCTC  
CTGACTTTTGGCCATTACATAAGACACAGAATTTTTCAGGAAATAAATAACACAGTTCGGGGAGGGGGGGGGGGG  
GTTCTGTGGTACCGTTTTTCTGCTTTGGGGAGCCGAAGCCAGCTCACTGAGTGAAGAGGAAATCCTGATTAGTATGCTC  
TTCCCTGGAAGCCGTGGCCATTCAACAGGAACACTACTACACTGTTCAGGCAGCCACACTAAAGGCAACACGAAATG  
AAAATCCCAAAGCAAAAGTCTAAATTTCTTGTCCAGATCACATGGATTATCTTTCAGTCAATGTTTGGATTTTTTTCTAA  
GCCTCAGGAAAGCTCCTCCAGTAGCGGTTCTGTCTGGAGTGTGTACTTATTTTGAACACTTTACTTTTAGATTAGATCC  
TTCCCTCACAGCACAGAGATGTATGTAAACTCTGGTTAGGTTCTGCAGGGGTAGAAATGAAGTGGTGGTCCCTGAGGT  
TGATTAGTACCATTTAAGTACATCTGCCCTCCCTTCAATTACACCACAGAGCAAGGGCGACAAAGTGTTCGATCAAC  
ATGGCCAGAGTCTGTCCAGAGATGTGACGTTGTGATGAAGAGATGAATGTGTCTCTGGAATGCCATGGCTTCAAGGAA  
TACAGTTTTCATGGCTTCATGCCGCCAAACCCCTGAAGAATGCTATGGTTGAGACTTTACCTGCATTGTTAGACTAGGCT  
AAATCTAACTCATAAATTTCCACACTTTTGCAGCTGATAAGCTGACTTTTAAAGATTTTTCAGATTTGCCCCCAAGGTATC  
AAAGCTATAATGTTACTAAACCGTTTTATGGCAAAACCAGGCCAGCCGTGATGTACGAGTATGATCCAAGTTGCCAAGAGCA  
AAAACGACCACTTTTTTTTTTTTTTTTTTTTACCTTTTCCCTTAAGATGTCTTTGGGGCTACCAAGTGCGCAGCGGTCTAAGGCA  
CTGCATCTCAGGGCTAGAGGCTTACAGTACAGAACCTGGTTTGATTCCAGGCTGTATACAACCGGCTATGATTGGGAGTC  
CCATAGGGCAGCGCAAAATTTGGCCAAGCGTCATTAGGTTTGGCCGGGGTAGGCCATCATTTGAAGTAAAGAAATTTGTTCT  
TAAGTACTGTGCTAGTTAAAGGCATTTCTGAAAAATGCCAAAAGAATGAAGGCACAGTAACATTTTAAAGAGTTTGT  
CATGTAGAGACAAATGTTCTCCTAGCAAGGGCTGGAAATTTCCAGGGACCACATGATTATATATTATCACGATACTTAGG  
TGCCGATACGATATGTGTTGCGATTTCTATGTATCAAAATCTGTGTTGCAATTCGATACTGTGTTTTTATTTGTGATTTGT  
TGTTCAAAACACATTTTTTCACTACATGTTTTGCTGCAGAGGAACAAGAGAAAAGCCATGAGAGGTAAGTACTCAAAACAT  
GTTGGCTCACCAATTTAAAACAATGAAAAGATTTGGTATTTATCGTCTATAGCTAGTTCCAGAGTTTTTGGGGCAGGTAC  
ACTGACTAGTGTGCTGACGTTTACCAATCGATACTGGAGTCACAGTATCAATATAAAATCGGCAAGAAAATATCACG  
ATAATCTACTGTATTAATGTTTTTCCCTAACCAACAACATAACACTTTGTTGGATGAGTTTGTGTCTATCTAATGCAGTGTG  
ACCAATATTTTATAGCGCGCTCTCAATCTAGAATTTGGCGTTTTGAAACAAATAGTGATGCAACAGCTCCTCTTTTTTT  
TTACGCAAAAAGCAAGCCTAAATTTAGAATGACTGGTCAATTTAAAAAAAACCTTTCAGCTAATTTTCAGCTACTGGCTT  
TGTTAAAAACAGCTATGATGAGCTCTTATGCAATGTATAACGTGTAAGATGTTGCTAATGTATGCTTTGTAAGATGTGCT  
AATTAGAGGTCGACCGATTAAATCGGAATGGCCGATTTTCAAGTTTTTCAACAATCGGAATTCAGTATTTTTGGTCCACC  
GATTTAGCCGATTTAAAAAAAAGAAATATATATATATATATATATATTTTTGTAATTAATTTAACACCTTTATTTAAC  
TAGGCAAGTCAGTTAAGGACACATTTCTTATTTTCAATGGCAGCCCTAGGAACGGTGGGTTAACTGCCTGTTTCAGGGGCAG  
AACGACTGATTTTTACCTTGTGACGTCGGGGATTCATCTTGAACCTTACGGTAACTAGTCCAACGCTCAACCCACT  
GTCTTACATTTGCATTTCAAGAGGAGCCTGCCTGTTACGCGAATGCCGTAAAGAAAGCCAGGTAAGTTGCTAGCTAGCATT  
CAATTTATCTTATAAAAAAACAATCAATCAATCATAATCACTGGTTAACTACACATGGTTGATGATATTACTAGTTTTATCT  
AGCCTGTCTGTGCATTTGATATAATCGATGCGGTTGCGCATTTCGCGAAAAAGGACTGTGCTTCTCCAACGTGTACTAACC  
ATAAACGTCATGCCTTTCTTAAAAATCAATACACAAGTATATATTTTTTAAACCTGCATATTTAGTTAAATATGCTGTGTA  
ACATGAATTTCTTTTAACTAGGGAAAATGTGTCATTCTCTTGAACAGAGTTCGGGTTATATGCAGCAGAGTTTTGGGCC  
GCCTGGCTCGTTGGCAACTGTGTGAAGACTATTTCCCTCAACAAAGACAGCTGACTTCGCCGAACGGGGGATGATTTAA  
CAAAGCGCATTTGGCAAAAAAGCAATCGTTGCAAGTACTGTACCTAACCATAAACCAATGCATTCCTTTAAATCAAA  
TACACCGAAGTATATATTTTTAAACCTGCATATTTAGCTAAAAGAAATCCAGGTTAGCAAGCAATATAACCGATGAAA  
TTGTCACTTCTCTTTCGTTTCAATGTCATGCAGAGTTCAGTATATGCACAGTTTTGGCCGCTGGCTCATTGCGAACA  
TTTGGCAGAATTTTACGTAATTATGACATAACATTTGAAGGTTGTGCAATGTAAACAGGAATATTTACACTTAGGGATGCCA  
CCCGTTAGATAAAAATACAGAACGGTTCCGTTATTTTCACTGAAAGAATAAACGTTTTGTTTTTTGAGATGGTAGTTTCCGGAT  
TTGACCATATTAATGACCTAAGGCTCGTATTTCTGTGTGTTTTATTTATATAAATTAAGTCTATGATTTGATATTTGATA  
GAGTAGTCTGACTGAACAGTGGAGGACCAGCAGGCTCGTAAGCATTCAATCAACAGCACTTTTCGAGCGTTTGCCAGCA  
GCTCTTCGCAATGCTTCAAGCATTGAGCTGTTTTAGCTTCAAGCCTATCAACTCACAAAGATTAGGCTGGTGAACCGAT

GTGAAATGGCTAGCTAGTTAGCGGGGTGCGCGCTAATAGCGTTTTCAAACGTCACCTCGCTCTGAGACTTGGAGTAGTTGTT  
CCCCTTGCTCTGCATGGGTAACACTGCTTCGAGGGTGGTTGTTGTGCGGTGTTCCCTGGTTCGAGCCCAGGTAGGAGCGAGG  
AGAGGGACCGGAAGCTAGACTGTACACTGGCAACTAAAGTGCCATAAAGAACAATCCAATAGTCAAAGGTATATGAAAT  
ACTAAATCGTATAGAGAGAATAATTCCTATAAATCCATAAAGTCAACCTAAAACCTCTACCTGGGAAATATGAAAGA  
GTCATGTTAAAAGGAAACCACCAGCTTTCATATGTTTTCATGTTCTGAGCAAGGAACTTAAACGTTAGCTTTTTTTTACATG  
GCACATATTGCACCTTTACTTTCTTCTCCAACACTTTGTTTGTGATTATTTAAACCAAATTGAACATGTTTTCATTATTT  
ATTTGAGGCTAAATGATTTTATTGATGTATTAAGTTAAAATAAGTGTTCATTCAGTATGTTGTAATTGTGATCATTAC  
AAATAAATAAAAAAGAATCGTCCGATTAATCGGCACCGGCTTTTTCTGATCCTCCAATAATCGGTATCGGTGTTGAAAA  
ATCATAATCGGTGACCTCTAGTGTAAATGTGTAGCTTGTAAAGGATGTGCTAACTGCTAAATGTATAGGTTGTAATGAAA  
GATGTGCTGATTTCTGTTGGACAGTGTGTTTGTCTGACGTCATTTTTCTACAAGACTAGACAAGTGGGGTTACAGTAAA  
GTTTAGACCTCTGCCAGTTATGGTGTAAACAAAATAGCTCACCAGAAAGTTCCTCATCACAAATTGCCACTTATTCATATG  
AATACTGAAGCTTCTCAAAGGTAGAAGATACATATGCTACAATCTGTGGACCATAACCACCAAACATTTTTGCGATGGT  
TTACGTTTTTGGAAATCCGGTCATACAATTGAGATGTAGACCTATAGAGTGTATTGGAGGATCTTTCATTTCTCTGTGATGT  
AGTCCATATCTCTGAACATGTGCGCCAGCACTGTTTTGAACATGAAATCCTTTGAGTGTACCTTTTTGTTAACCCCTCT  
CAGTGACACCTGCAGACTATAGAAAGAAAAGGCTCTAGCGCTGCCTGACAGAGCTTGTCTGTCTTTTTCAAAGTCC  
AATCATGGCTTACTGTGGCCTCCCTTGTCTCATTGAACTCAAGCTGAGAGCGAGGGACAGGAAAGTAGCTGACTAG  
AATAGATAAATGTCAGGATGCTGTGCTATTCTTACCAGGGGAGAACACAGCATCAGACGGGTCAACACTTTCTC  
CTATACCGTAACTAAAATATGTGATTTGCCTACTATTGTTGTTAGGCTATGAACTGTGATGTTGACTCACAGCCCTG  
TGATTGTTATTTAGCTAAATCTTATAGCAAACTTCAAGTGTACAACAAAATCAACTGAAACACTAGGCTATGCAACCGT  
TTGACAAAATTTAAATTTGAATTTCTTCATCAGCAAAAGCATGTTAGAATTTCTACTCAAACATCTTGCATTCACAG  
GGTTGATAGGAATACACTGAAAAAATATATATAAATGCAACATCCAACAATTTTTAAAGATTTTTATTGAGTTACATTT  
CATATAAGGAAATCAGTCAATTTGAAATAAATTCATTAGACCTAAACATATGATTTTCATGACTGGGAATACAAAATG  
CATCTGTTGGTCCGACACTTAAAGGTAGTCGTTGATGAGTTCGAGAAACAAGTCCGGTATCTGGTGTGCCCAACTTTGCCCTC  
ATACAACGTGACAAAATCTCCTTCGCATAGAGTTGATCAGACTGTTGATGTGGCCTGTGAACTTTGCCCCACTTCTCTT  
CAATGGCTGTGCGAAGTGTGCGAAATTTGGCGAAACTGGAACACGCTGTGCTACACGCTTATCCAGAGCATCCCTAACA  
TGCTCAATTGTGACGTGTTGGTAGTATGCAAGCCATGGAAGAAGTGGGACATTTCCAGCTCCAGGAATTTGTGACAGAT  
CCTCCGACATAGGGCGGTGCATTATCATGCTGAAACATGAGGTGATGGTGGCGGATGAATGGCCAAACATGGGCCCTCA  
GGATCTCGTCATGGTATCTCTGTGCATTCAAATGCCATTGATAAAATCCGTAGCTTATGCTGCCCCATACCATAACTCC  
ACCCCATCATGGGGCCTCTGTTCATAAAAGTTGACATCAGCAAACTCGCTCGCCACATGACGTCATACACGTTGGTCTGCG  
GTTGTAGACCGTGGACGCTGCAAAATCTCTAAAACAACACTTAGCGAGTTTATGGTAGAGAAAATGAACATTAAT  
ATCTGGCAACAGCTCTGGTGGACATTCCTGCACTGACACTTCCAATTCACACTCCCTCAACTGGAGCTCTGTGGCAT  
TGTGTGACAAAACGTCACCTGTGTAATGATCATGCTGTTAAATCAGCTTCTTGATATGCCACACCTGGCAGGTGGATGGA  
TTATCTTGGCAACGAGAAATGCTCACTAACAGGGATGTAAACAAATTTGTGCACAAAAGTTTTAGAGAAAATAGCCTGTG  
TATGGACATTTCTGGGATCTTATTTTAGCTCATGAAACATATTTTTTGTCTGTATATATTTGGCGTGTTCATAGTCA  
ATCATAGACATTAACCTGCCGAATATTTAAAGTTTGTCTTCACTTCTTCTATCTAAGAACAGGTTTGACAAAACAGTATAC  
TCTACAAAAGGGAAGTCCGATTTCTTTCACCCGAAGATAATACATTTTCAATGGACTTTGCCCTGGGGGTGAAGCACAC  
GACTTTCATGAGAGCCATTACTTCTTAAAGTGCACACAAGGCTGAGCAAGCTCACATGGCAGGCCCTGGGACATTTGAAT  
GTCGCAAGCCATTAGATCAGGGATGGCAGTGTCTTGGTTGAGGACGATGGACGCTAAAAGCTTCCCCACATCTAAAGTG  
CCATATGCATGCTGTGATTTTTCAGTATAAAACAACCTTACATGAGAAGTACCGCCCGCATGTCTTTTTCTGTTGAATGCC  
ATTTTCAACTTCCAGCTGGCCTTAAAAAAGGCATCAATGTTGATTTGGGTGAAAACAAATTTGAACTCTTAGTAATATC  
ATGAATCTTTTTCATACCAAATGGAATCTGTTTCATTGATGTCAGGCCTTTCAGCGTGCATTGAAGACTTCATCTGATGC  
TAGTCAATTTGATGCAGAAATATATGTTTTATTTAGTTCAGCTTGAATCTGGATGAAGGTTGAAAATAAAGTGTGGAACAC  
AACAAAGACACGGACTCTTGGGAAATGTCAACGACGCTGACTACAGACTACTAGATCTGTGTGAGCTATACGTTTTT  
AGGGGGGACTCATTGTGGTTACCTTAATGCACTGTGACAGGCCTTAAAGTGCAGCAACACAATTTTCAAGGATTT  
CTTCAAGGTAACGCTCAGTTCTCAAGAAAATAGAAGGGGTTGGGGGGCTTAGGAAAAGACGTAATTCACAAAAGATATG  
TCAACAACCATTTGTTCTTTCACATCATGTGACGCACCATATATATGGTATGCTGCTCTCACTTTACTTTGACCTCTGTGT  
TAGCATCTCATTAAATCAGTTTATTTGATGCGTACACAGTTTAGCAGATGTATATTAAGTGCAGTGAATGCTTATGTT  
ACTAGCGCTAAACAATGCAGTAAATGTCAAATAATCCCCCCAAAATGTCGGAACGAAACCCGAATAGCACTGTAACAGT  
AATCCAAATGCAATGTATACATATAACTTTGATGAAATTTAAACAAGATATACTAAGAATATGTACAGCAGTAGATACT  
GTATATTAGAGTGAGACTGATGCATTAATTGACCACAATAAACAATGTTTTATGTTCCCTCTCAGCGAGTATTTTTAA  
GCTCTCTACAGCCTATAGTTTTCAGTATGAAGCAATTTATCCAAGGTCAAATATTTTATAGACATTAGAATAGTTTCCTTAGAG  
GATGTAATTTCATCTTAAAATGTTGTGCTGCCTGCTCCCCATAAAAAGACAGGTAGCCGACCGGTAGCCTTTCAGGTGTGCT  
GTGTAGCTTGTGTTTTTATGTTGGCCAATCAAAGTGGCAACGAAAGGCTCAATATGTAGCAAGTGGAGTGTGTCCTACTA  
ATTCAAATGCAAGATGGAATACAATTATGGAATTTAAAGTGTAGCAAAATGAGAAGTAGGCTACAACGAGCAACCAACAGGT  
AGGCTATTGTTTTATCTGAATGGGGTGGGGGAGAAAGCGCAGCATTTAGCTTAGCTAGCTATAGCTTCTCTAGGCTGTCT  
CAGTCAAGACAGGTAAGTGTGATGGGATGATGCATAACATTGTGGCTGCTACAAGTTAGCTAGCTTTGGCTATAGCCGA  
GATCTCTTCTCTACTCTCTCTCTCTAATATTCAGTCTCTGACATTTGCTCGTTCTGATATTTTCTTTTTTCTGG  
ATTTGCTTTTTTATTGCTAGGTATTTACTGCAGCTGCTGGAGCTAGAAACACAAGCGTTTTCCCTGCACCTACGATAACATCTGC  
AAATCTGTGTACACGACCAATAAAAATGTTGTTGAGCCTCTCTCCCTATTCGTATAGTGAATGTTTAAAATCCCCAT  
CCCTACTGCCTTAGCCAACTGATTGTATCCCATATACTGGCCTTCTCTGTTTTGATCTGAGTGTGACTTGGCTCCACAG  
AGTCAAGAATTTAACTGCACGCATTTACAGAAAATGTTGAATTAATTTTCTTTATTGAACCAAGTTTATGTTGATAGTTT  
TCTCCCTCTGGGCTCTGAGAGGTAGGGCTGAAAAGGAAACATTTGATGACCTTAGACCATAAAGGCCTGCCATACCCTAGC  
AGCAACATGACAAAAGAATTAGCAGGCTGCCATAAGTGCATTATGCCAAATTTGAACATTAATGTTTATACTTTACAT  
ATGGCTATTTTTAAAGAAATATATACGTTCTTTTTGCTCATCTGAAACTGTGCTTAAATTAATTAATACATAGTTTCTCAG  
GGGTTAAGCCTGAGCGGTTAAAATACGTTTTTATAGAGATTATCTAGTAAATAGTTTTCTCTATGAAAAGCAATGCTCAC  
GATAATGCAGTTAGAAGTCAAACACTGACATTAGGCAGCTCCAATCATCAAGGAATGCTAAGGAGTTAAAATAGATTTTAC  
CGAAACGGCAGTGAATAATCAACCCATTTCAATATCCAGACACATGAGCAAAATGCTTAGTCATACAGAGTCGGGAATA  
CCCCACTCCCAGTTTTTCAGTTGGCCATATGATATCTCAAATCAAATATTTTGCTTCTGCTCAGAGAAGTGAATTGAA  
AGAGTATTAGCTCTCTTTTACCTCTAAATCTAAAGTATATACTTATTTCTACTGGTTTACAGATCAGGTATTTCAG

GTTTTTGCTTTTCTCTTCCTTAGGATGGCTCGAGGCAGCGCAAAGAGAGGAAGAAGACGGTTCGTTCAGCAGCATGCC  
 ACTGAGAAGAAGATCAGCAGTGGGACTGCATCAACGCCATGGTGGACGGCTCTGAACCTGAAGAAGGTCGCCCA  
 CTCCCCTGTTTACCAAGCTACTTCTCTGGATGGCCATGCAGTCTCTAAGGTGGGAACCTCCAAAAAGAGTCCAG  
 AGAAAAGCCAAAATAGATGCTCAAGTCCATCAAAGAGGTGCGGACAGGAAAAACACAGAAACCTTTAGGACCAACGGAAATA  
 TATGATCAGATATCAGAGGACTGTGCTTCTCAATCATCTATGGGGTAACATGAGTCTTTGGACTTGATTGCAAACCTC  
 TGCCGATATGGCCAACATATGGGTGACCGGGCTTAGATACCTGATATCTATGGGAACACACCTTGAATATGATTGAAA  
 GCAACCAGAACAACATGCGCTCCTCTGGCTCGGTGACCTCTTTGAGGAGGCTGATGCCAACAACAGCAAGCACATCAGT  
 CTATGTGCTGCTGTTAGCTAATTAACAACTAAACCTGGTCTCAAAAACATCAAGATTGAACCTCAAGTTCAGGAGTT  
 TCACAAATCTAAAGATAAAGTGGGATGTGGTGTGACTAAGGAGGAGTTCATTGAAGTCTTTCATGACCTTTCACAAAGAC  
 CAGAAATGTATTCTCTTGTCCAGTCTCTAGCAACAAGGAATTTCTAGATACCAAGGACTTAACATATGTTTCTGGAG  
 GCTGAGCAGGGTATGGCCACAAGTAAGTGAAGACACCAAGTCTGGAGGTTCATTGAGAGCTATGAACCTTCCAAAAGAGGGCA  
 GCTCAAGGGCTGGCTCTCCCTTGTAGGGTTTACCAATTATCTCATGTGCGCCAGAGTGCCACATCTTTGACCCTGAACAAA  
 AACAGTGTGTGAGGACATGAACCAGCCCTTGTCCACTATTACATCAACGCTTCCCAACAACACATACCTGATCGAGGAT  
 CAGTTTAGAGGCCCTCTGACGTTACAGGCTACATCGGTGCCCTCAAGATGGGCTGTCGTAGTGTAGAACTAGATGTCTG  
 GGATGGACCAGATAATGAACCTGTCAATTTACTTGGCCACACAAATGACCTCGCAGATAGTCTTCCGCAGTGTCTGTGACG  
 TCATCAACAAATATGCCTTTGTGCACTGACTTTCCCGTATGATTGTGTCTGGAGAACCCTGTCTCTAAAGCAGCAG  
 AGGGTCAATTTTACGACTTGA AAAAGATTCTTGGTGAATAAGATTACATGGATCCACCCTCATGTAGGACAGTACCT  
 GCCCTCACCTTTTACAGTAAAGTATAAAATCCTGCTGAAGGGAAGAGCTGGGCACGATCTGCATTAGCTCGGAGGGCG  
 AAGTGACTGATGAGGATGAGGGGCTGAGATGTCCAAAAGATGAACATTGAAGCCGACGAAACAACAGAGCATCCCCTG  
 AAAAGTTCCAGCTGTCCAAGGACCTCTCTGACCTGGTAACTGTGTAAATCGATTGCGTTCAAAAGACTTCCAACAGC  
 TTTCCAAAAGCCAGAGGACTGGAACTTTTGTCTCAATGAAGTTTGGCCAGTCTGTGCCAGTGAATCCACGGTG  
 ACTTTGTTAACTACAAAGAAATTTATGGCGAGAGTCAACCCAGCCCAATGCGGATTGACTCCAGTAACTGAACCTT  
 CAGGACTCTGGAAGTGTGGTTGCCAGATCGTGGCAATGAACCTAGAGCCACCCCGCCCTGATGTAGGACTTAACCTTGG  
 CTGGTTCCGTGAGAAAGTGGAACTGTGGTTATGTGCTGCGACAGCCAATAATGAGGGAGCAGGTGTCTATATTTTCA  
 ACATAAAAGACTCAGTGCCTGGTGTGTCTCCTCAGCTTGTGCACATAAAAGATCATAAGTGGACAAAACCTTCCCAAACCC  
 AAAGGCTCAGGTGCCAAAGGAGATGTTGTTGACCCTTACGCTATGTGGAGATCCATGGCATCCCTGCTGATTGTGACAG  
 GCAAAGGACTAAAACGTCAATCAGAATGGGGGAGAACCCACTGTTTGGAGAAAGCTTTGAGTTTCAGATAAACCTACCTG  
 AGCTGGCCATGGTGGCTTCTGTGGTGTGATGATGACTACATTTGGCAGCAGATTTCATCGGCCAGTACACAAATCCCTTC  
 GAGTGTCTCCAGCCGGGATTCCGGCACACACCAATCAACTGCTAAGCCGGGGAAGTCTTTCCCAACGCTGGCTGTTTGT  
 CCATGTGCCCATCAACAACGAGGGGGGAGCCCTCAAGAGGGGACTGTGTGCGTAAGGGCAAGAGAAGTCA  
 GGGAGTACGCCACCTAGAGGTTGCTGGTGTCAAGCTGTGGACACATCTTCAAGACAGCCATACTGCCACTGAGGGAA  
 GCCACCGACCTCAGAGAAAACATGCAGGTAAGGGAGTGAACATTATTTGTAATAAGGGTTACATGGAGAAAATCGGACCT  
 CTCTGAAATGAACTGGATGGCCCTCCCTTAAGCAAAAATATATTTTACCTAATCCCTCACTGAACATAAAAAAATAGGA  
 AAAAAAGTGAACATCCCTATAACCAAAATAAATTTAAAACAACGTTGATAGCAGAGAACATGTCTGCGGTTTACCCTC  
 ACGTCTTGGACAGACCAGAGCATTTACATGGCAACGCAGGAATTTCTTTATAGTGCACAGGGCTGCGGGCCAGAAGGTTATG  
 GTTTGGCAGATCACCATGGCAACAGTAGGGATAGAAATGATCTCTCTCATAGTAAAATCATTGCGTGAATATATTTATTGT  
 ATTTGCAAGTCTGAGGATTTATTTTTATTTTTATAAAAATGTCATGCAATTCTACATAATCTTTTTTAATACACACTA  
 ATTTACAAAATTTACAGGCTAAGGATGGACTGAGCAATAGCTTATGTGTTTCATCTTATCATATTTCTCCAATGCCAAATCA  
 GTGTGTCTGGTTTTGCAACGAAGCTGTCCGTGTTTGCAAAATGATTAGGAATCTGAGCATGGGTCTTTTTAAAAAGTTAGGCC  
 TACCTTTCACCCCAGACAGTAGGCTACCGACTCATACAAATGTAAGCTTTATCTGTGGCCACTTTTTCTGTGGTT  
 TAACCAACGAGAGATGGTGAGAAGTGTTTCCCTAAAGCTGTCTGGGTTGAAACATCTTCTATTGTACACAGTGGACAG  
 CTTAATCAACTGATAGTACAGAAATGATTACTTTCCCAACCAAGTCTGTTTTGCTCATCGGCTATAGAAGGTTGTAG  
 CTCAGCTCTTAATGTCAAAGAAAGGATGCATCGGAGTCAAGCTTTCCTGGTATTTTACAGCTGTTTCTAGCATAAA  
 ACATTTGCGGACCAAAGCGCGGTTATAGATCACTTTACATAATCGGATCCCAATTTTTATTTCTTCAAACCTTATGCCAAC  
 AAGGGGTAGCCCTGTGCTTTTGGCATATTTAAATAGAAGATAGGCCATGGCATACCCCTCAACTTGAGTGTGATTT  
 TAACTTAACAGCCCTCACTGACACGGGGTAGGATATTTAAAGGATGCATGATGGGTGGAGGAATGACTGACAAATCTA  
 TGGCTATAGCAGCCTATAGCCTAATGATGCTGTCAACAGGTGGGCTGGGTAACATTTCTGTAATTTGATCCATCC  
 CTAAGGATTTGACTGTAAAACATCACAATTTATGCCAGTTTCTATTGGCCAGGCTAGCCTACATGATGTCTATTTTTG  
 GGGGAATGTGCATGCTTTAATAAAGTCTGGATGAGTCTGTTGAATCAAGTTTATTTACTCACCAGCTACATGGGAAT  
 GTTTTTGTAGAAATGAAACTGACCCCTAGACTGAGTCAAGCGGGATCACAGCAGATTACTACAAAAGCTGTGTGATCAT  
 CTA AAAAAGAAAGCCCTTTTGGCAAGAGAAAACAAAACCAAGCTTGTATTTAATCAGATTTAATCTAATCCATGTGT  
 ATTTGCACAACAGTCAGGAGCAGACTCAAGGATACTTCGAAGCTCAGAGGCAGTCTGGTGTGATCTCCCCTGGAGCACTGAG  
 GACTGGGGCTGATCTCTATATATCCAGGTAGTGGCTTATGAGCATACTCTCAATATATAAAATGGAAAACGTTGTTATGT  
 AATACTGCGCTGTGGCCTTATGGGCTGTGAGTAAATAATTCTAGAAGGAGATTACTGTATGCAGTCTAAAGGACAGATT  
 ACCACAAATTTATGTTGAAATGGAGTGGAAACGAGACTAGTGCCTCACTATTTTAAAGGGCAAAAACAGATATGGTGT  
 TTTACTTCAAAATTTGACTCAGTAAGCTGTTAGGAGCAATGATCAATCTTTTATTTGGTTGAAACAGGACATAACAGAAG  
 ATATGACCAAAAAGATGAACAGTAGGCTATTTGTTACCCAGGACCCACTGACAAATTTGCTGTTCAGACTATCCATCTGC  
 TTTTGTGCAATCTCTGTGTGCTCACTAGCTTTCCACTAGGCCCCCCATGAGCTAGCTACTTCAAACAGCTGGTCTTTTCT  
 GATCTTCGCCACTTTTTTCCACTGAAGCAATACCAGCAATGTGTGAGGAAAGTCACTACTCGATTTTCCCCCT  
 CTGTGGTTGTTTTTTGTGGTGATTTGTATTAGGTTTATTTTTGTGCTCTGTTTTACATGCGATCATATGTGATA  
 ACAGGCCACTGGCAATGAGACTAACACATCTTGGGCGTCTCTCTGTGGCTGTTTGTCTCCCGTTGTTTACACGCTGT  
 TTAATTTGGGCTTTTACAGGAAGTTAGGATTTGTGTGTGTGTGTGTGTGTGTGTGTGTGTGTGTGTGTGTGTGTGTGTGT  
 GTGTGTGTGTGTGTGACTAACAACAAACAAAGGTTTTTTGAAGGTAACATGTACTTTAATCCTTTAATCCTGATCTC  
 AGGTTGTTCACTGTACTTGTACTTTTACCTGTAAATTTAGTAACACTACATAGGCCACATTAACCTTAGGTTAACTTAA  
 CAGA GCTCAGTTGTTATTTTCTACGTTACATAAATTGAAAACATTAGGAATCATCTAATCACTGATCTTCATTCATAATGAATTA  
 AATGAACCAGCTGATTGAGATAATTACTCAAGTGAAGTGTACGCGAGTGTGACTTTTATCTTAAATGACTAAAACCAACT  
 GAAATGAAAACAAACAGGAAGTCTGAACCGTAATAATTCACCTGTGACGTCATGCCCTAGTATCATTTAGGCTAATGCTGT  
 TTTGCAACTTTGTCTGCAATAGGGTGTGAACGTTTTAACGTTAAAGAAAATGGGATCCCTAACCGAATCCCTAACCAAC  
 ATTTTATTTGATTTTTTTTTAATGTAGATCTAGAAAAGTAAACGGCGTGACGAACCCATGCATATGTGCAGATACTATGT



CAGTAGTACGCAAGTATACACACCATGGGACCACGCAGCCATCATACCCTCAGGAAGGAGACACATTTCTGTCTCCTAGA  
 GATGAACGTACTTTGGTAAGGAAAACGTGCAAAATCACACCTACGAACAACAGCAAAGGACTTTGTGAATATGCTGTATGAA  
 ACAGTTCAAACGTATCAATATCCACAGTAAAACAGCTCCTGTATCGACATAACCTGAAAGTCCGCTCAGCAAGGAAGAAG  
 CCAGTCTCCAAAACCGCCATAAAAAAGCCAGACTACGGTTTGCAACTGCACATGCGGGACAAAGATAGTACTCTTTGGAG  
 AAATGTCTCTGGTCTGATAAAATAAACTGTTTGGCCATAATGACCATCGTTAGGGGGAGCCTTGCAAGCCGAAGAACA  
 CCATCCCAACTGTGAAGCACAGGGGTGGCAGCATCATGGTGTGGGGTGTCTTTTCTGCAGGAGGGACTGGTGCCTTCAC  
 AAAATAGATGGTATCATGAGTGAATGATGTGTATATATGGAAGCAACATCTCAAGACTTCAGTCAGGAAGTTAAATCTT  
 GGTGCGAAATGGGTCTTCCTAATGGACAAGGACACCAGCATACTTGAAGCAAAGTTGTGGCAAATGGCTCAAGGACA  
 ACAAGTCAACATATTGGAGTGGCCATCAAAAAGCCCTGACCTGAATCTATAGAAAAATATGGGCAGAAGTGAAGAAG  
 CATGTGCGGACAGGAGGCTTACAAAACCTGACTCAGTTACACCAGCTCTGTTAGGAGGAATGGGCCAAAATTCACCCAAC  
 TTATTTGTGGGAAGCTTTGTGAAGGCTACCCGAAACGTTTGACCACAAGTTACACAATTTAAAGGCAACCGTACCAAATAC  
 AATTGAGTGTAACTTCTGACCCACTGGGAATGTGATGAAAGAAATAAAAGCTGAAATAAATCATTCTCTCTCCTATTAT  
 TCTGACATTTTACATCTTAAAATAAGGTGGTGATCCTAACTGACCTAAGACAGGGAAATTTTACTAGGATTAATGTCA  
 GGAAATTTGAAAACTGAGTTTAAAGTATTTGGCTAAGGTGTATGTAACCTTCGGACTTCAACTGTAGAGATAAACTACT  
 CTATTATGGGTTTGTCTGGTTTTGTTTGCAGATGAAAAGTATAAGTGGATTCTTCAAGTATCTTCAAAGTGTCTCTGC  
 AGAAATTTGTCTTAATGAATGTGTCTGTCTTCGTTGTAAATGTATTTGTGATGATTTTCTAGAATAAAAAGGAAGGAA  
 GTACCAAATGTCTTACAAGTAGTAGATTGTTTTATGATAACCAATTTTGTAGCCTTGTAACACTCCCGACTGAGTACA  
 CCACAAAATACACAAATCAACTCGNNNNNNNNNNNNNNNNNNNNNNNNNNNNNNNNNNNNNNNNNNNNNNNNNNNNNN  
 NNNNNNNNNNNNNNNNNNNNNNNNNNNNNNNNNNNNNNNNNNNNNNNNNNNNNNNNNNNNNNNNNNNNNNNNNNN  
 TCTCAGTACGAAGTACTGTTTGGCTGCAACCCGAGCAGGCTCATATTACTCTGCAAACCTAACTCTAACTCTCAAGAT  
 GTTACTAAGACACACCTTAAACACTCTGACATGTTAGCGAATTATTACATTTAAATGACTCTGTTTTATCAATAACG  
 ACCTGAAAAGGGGAGAAATAATCACGAGAGTGTACTGATTATTCTCTCAGTGAGAACTTTTACTGTAATGAGGAAAAG  
 ACCGCGAATTTCCCGCGAACTTGGGTGGACACAGCAATCGATCTCAGGCTCATAGATTAAGAGCATTTAGTAGATC  
 ACAGATTAACACTTTTCCCTTACGTTTAGCACCACAAATAAAGTAAATCAATATAACGTTTACACATCTCTTTTACAAT  
 TCTTACCTTTTGTACGCTTGATGGATTTGAACTTTAACACAATTATGAATGTTATCAATCTCTATCAACTAATACAGAAT  
 GCATGATCTTTTTAACCTTAGATGTTTTAAGATCTCACATACTATGAACCTACTAATACTTTTTAATGTATAACAGGCT  
 GAGTATTTCTTTAACCTGTACATTACACTCATCAGACTGTAGAAATGCTCTGGGTTGCCTTCGTAAGTAACTAAGTTTGA  
 TGCCACCTCAATAAATATATAGGCCATATATTAATTTGTCAGTGCTTTCAAATAATTTTGTAAAGTCACTTAATTTTT  
 AAATGATGTATCAACAAAGAACATTTTGTAAATGCTTTATACCAATAATCCCACTTGGGTGTAGAGGCTGGGATCTC  
 GTTTTGAACCTTCATCTCCTTACTGCCTGAAGTGAACAGCCAGCCAGTCCACTTAGCAGTCCAGTCCAGTGCACACA  
 GACACACAGTCCACTGTCTGCTGATCCCTTAGCTCCTGTGACATCGCTCCTAAGTAGTACTCTCTCTTTCTACTGG  
 CTGGAAAACCTGGCAGCAAAAGGATCGATCTCAGGGGGCGAGGGGGGCATGTTGGGTCACTGGCCGACCGTCAAGAT  
 GACTTGGCAACTGGAGCTCTGCTGAAAAGCTGCCCACCCAAAGCCCCGCCCCGCTGCTTGGCCATGGAACAAGAC  
 TGCTGCTTTTTATGATGACCTTGCAAGTGTCTTAAAGTCACTGAGGGAATGTACAAGTCAATTACGCCAGAGCAGCGAA  
 CATAAAGCCCAGCACCCTGGCACTAATGAAACCGGAAGGCTGCCGTAAGTGTGTCACTCTCGCCCAGAATCACATTAAG  
 AAGCTATTTCAATTTTAGATGATACATATTTCTTGTAGATGATGTATTAATTTGCACTCCGAGAGACAGTAAAGAAGG  
 AGAAAGATCCAGATGGCTGTGTGACCTGTGCTGACTCCTTGGTGTGCTGAGTGGTATTACCAGGATCCATGACAGTAAA  
 CACATGCATCATTAACCTCCCGAAATACCCCGATTACCAGTATAGGTATTTTTGGGGTGTTTATTTTTTGGTCAGGCAT  
 AGAAGTGCAATGGGCCCTCTCTGTGATCAGAGCCACAAATGACAATTTCAACACAGTCAAGGAGTCAGAAGTGTGTGCAC  
 TCAATTAAGGCAGGGAGCTAAATGTAGCAGTCCGCTGCCAGCTGTAATGCCACAGATAAGGCTGTGTTACGCTCCGAA  
 CAAGGCTCTCCTATTACAACAGATTGCTGTAATAACAATAAATACCCTACTCTTGAATCACATGTTTTTCAGACCAAC  
 TCTGAAAACAGGACTTTTATAACGGTAACACGCAATTTACTGTAATACCCTAGTTGTCTTGCAACTTCAATAACATGCTCT  
 GATACACTCCCTCCCTCCGTTTTTACCCTGCTCAGCAAACTCCCGCTGCTTGGCCCTCTATCTCTGTAATAAGGGCT  
 TAGGCTTTTTTTCTCCCTTGGATACACTCTGCAAGATCCACTGCTCCACAGATAAAGATTTTCTCCCTTTATACAATC  
 CTCTCTGAAGTATGATCGGAGAGCGGCAGCTAACAAAAAAGATGGACTGATTATGCCGGCCCTGTTACATAAGAGTTAT  
 TAACATTTGATTTCATGCTCATTCTGTGACCCGGATGCTTTGAAACGCTGCTTTGGATGTGCTGGTTTTTGTGATTTCT  
 CACGGCTGCGCCTCGCTGCTCTAATTAGGAGGTTGCAGCTGAGGTTAAACACCCAGGTTCTGAACAGAACAAC  
 ATCAAAGACTGGCAGCGGGCTGCGTCTCTTTATGCTGTTTTCCACCAGGAACCGCACCCTACAAGACTGCAGAAATG  
 AGATCAATCTCATTATAACAAATGAACGGGAATCATTACCAGAATGGATGAAAAATTTTATAAAAAAATAATGCA  
 TTTTGGCAATTTGATTGAAAAATAATGATCTCATTGTTGGGAGAATTTCTGTTTGCCTTTGATATGAATATTTGCAGT  
 TGTGTCTCTGCAATTTGATATTATATCTGTGCTCTTGTAGTCTTTTATCCCGCTCTGGTGAAGTCTGTGAGAATAG  
 CCTTCTGGCCCTGCATAATGTGTTGACTTGACTTGGGCAGGGGCAGTGTCAATCCAGTCTGCTCTGGGGCTGGGGGATC  
 GGGAGGATCTTGGAGCCTTGATAGTGTGATTGGCAGCTCATCAATGGAAAGCAGCTGGCAGAGATCCACCCCTCGCTCCA  
 AGTTGGGAGAGTCTTGGCTTGAGAAGCTGTCAGAAATGTTCACTCTCTCTTCTCCCTCCCATATAGGGGAACACAACA  
 AGGTGGATTTTTCCGAAAGAGTCTAGTGGTGCAAACTCTGCAAAAACCAAATTTGTGTGCTTTAAAAGCAGCATAGAATT  
 GACCTGTAGATTTACTACAGTACAATAAAAATCAATTTCAATGAGAGGATAATTTAGACGCTGTGTCTTTTAATCTAAT  
 GCAGGTAATTTCAAGCAAGTCTTCAATCTAAGCATATAGATTTAATTTATCATGAGGATACTGCTGGAGCGCGA  
 GTGAGGAAAAACAGGCATCGTTCCGCGGGTGGGATTTATTTGGTTTTCCAGATGGATGACATATAAAAATATCATAGTCT  
 ATTTGCTTTGGCTCATCAAGGGGGCGGAGGAGTGTCTTTTTAACTGAGGTGTGCGTCCGAAATCAATGGCTTCTGGCCATC  
 ATCTCCTCTCTTAGTATTATCACAACACTTACAGGACCTGCCTTCAAGCTGCTGCCCAGACATTAGCATTGGTAGTC  
 TGAAGTTAAAGATGTGAACTGCCTGAACGAATGGTGTGAAAGAGACAAACAAAAACACTCTACTCTCGGCAGCAGGGT  
 GATACGGAAATTTGCTCAGATGTTCACTTTTTGGTGTAGCTAGATCTATAGTATTAACAGTATATTGTGTCCATAGTCT  
 GAAAGCATTCTCTCAAAGTTGCTATGAAACCATCACATTTTTTCAATGTATGGATCTTGAATGTCTATAAAAAATG

AACCTAAAAGTAACTAGGGATGGGCACACATACACAGTGCCTCGATTTAAAGTTTGCACTTGTCTTACTAATTACTTGCATA  
CAAGTACTCGAAATTCACAAATGCACTATTTTAGTAGTTACATTTATAAGCACTGACAAATTTCAAACCTCAGGTAAGGTG  
TGTGTGTGCTACTCCACAAAAGAATGTCAAGTGCAGTGAATTAAGTGTGGTTTTCAGTTGCGTATCAGAACAAC  
AGCATAGCGAAACTTTTTGCTTACGCCCTGTTTACACTAAACATGTGAGTACTTAATTAATTTCCATGACTACTCAA  
CACAGAAATTTCTTCAAATTTCCATCCCTAAGATGTACTAACTAGGCCACTCAGTTGAGCCAAAACGATAGGCTACTGA  
AGCTAGGAAATGCTTTCATGTATTTGTGTATTTTATTAGTTAATATGGGCACACAAGACAACCTAAACAAGTTAAACATGG  
GCTTCCACATTAGCCGCCAAGGCTTCTTCTGGTCACTACCAGGCACCATATCAAATCTACTGGGCTGGATGTTGTAAT  
TTCATCGATACGTATGTGAGCTGTGAGTGGAAAATGGGTCATACAACTGTATTTCCCTCCAGACAGTGTAGCAGAACAT  
TCCAGCAAAAAGCTACTGGAGTTCGGAGTAATCCATCATAACCGCTCAGAGAGAGCAAAACCGCTCAAAAAGACCTTCTGG  
GTAACAATAAACCAAGATCAGTACTTATTTTTGTATTTAACTAGGCAAGTCAAGTAAAGAACAAAGGACGGCCCTAGGAA  
CAGTGGGTAACTGCCTTGTTCAGAGGCAGAACAGGTTTGTACCTTGTGAGCTCAGGATTCCAACTTCCAACTTCCAACTT  
CGGTTACTAGCCCAACGCTTAACCACTAGGCTACCCTGCCGCCCTTTAGACTTACTGTCTAAAGCGCACAGATCAAAT  
GCAACTACTTGCACCTCACACAGGTACCAAATAACATCTGGGACAATTCAATAGCTGAATCCCAAAGTACACCTAGTCTGG  
ACAGAGTAACGCTAAGGTTAACTTTTTACAACTGCCTAAAAAAAACAAAGCTAAAGAGAAAATGTGGAGATAAGATGAA  
TGGAAAACCCCAATACAGTAATGGTATTACTACAGGGTCAAATGCATAATCTATTTCAGGAGGATTTGGGACACTCA  
ATCAATGTGTGCTTTCGCGATTCAATCCATTTAATAAAGCTAGTAAACATTTTAGCTAGGCTACAATACAGGTTGG  
GGAAACGGTTTTCATTAATATTTCTATGACTGGGCACTCTGGTCCAAAGTTCATTATGCTGAGTTATTGAGCTCCAGGAA  
GACGAGGAGAAAGATTACACATATAAAGAAGCTAACTCCCTGTTGTATTGTATTGGCCATTGCTCAGTAACTTCATCTAGGTCAG  
TGCCGCTCGGTTATGGACTGTCAAAGGTGACTGAGAACCTTTTGGTGGCTCTATACAGTCTGTGTCAGCGAGCATAAGCT  
TGCAGAGAATTGAGTTTGAAGGGTTGCTCAGAATGACAGAATTAGTCCCCCCAACCTTACACTGCCTTGTGTAAGCAA  
CCCCTGCTGAGAGTTGGTGTGTGTGTCTTTCCAGCACAGTCATGCTTCATGAGTACAACAGTAGTGTGACTGTAGTTACA  
GCAGCACAGCACCTGAGGGTGGGGGATAATCATTTCCGGAAATCATTCAGATGTTTCACAGTGCACAACATAAAAAAGGCTG  
GGAGAACAGATTATAGCACTATGATGGTAAAAAAAATAAAGATATATGCCCTACACATTTCTCTGTAAGAGAA  
TACAACACTAGCTCAACAGGGCTAATTTGTGAACTTTCTTTGGCCATTTTCTGTCTCAACTTCCTCATCTAGGTCAG  
GTATGTGCTAACTGCTGGAGTGCCATATCACAGACCTCCTCAGAAATCTCCTCTCCTCAACATCCATCCATCCAACCCAC  
ACCCACCCACTGTATATCTCAAATGTACGGTATTTGGTGTGGCCATGGAAACAACACCAACAGGGCTGGGAACCGACCC  
AGAGCTGATAGAGCACCGGATAGATCTGAGCATGCTCAGTCCGACCGTTTCAGCTTGTGTTTGTGTGTGTGTGTGTGTG  
TGTGTGTGTGTGTGTGTGTGTGTGTGTGTGTGTGTGTGTGTGTGTGTGTGTGTGCTGGTGAAGCTATTAGTGTATACCAAG  
TCCCGTTACAGAGCACCTTAACGGCCAGACCCCTCAGCTGTGCTGATGTTGTGGACTCCACTGCACCCGTGACTCAAT  
CAACACACGGCAATGTTGCTGTGATCCTAACGGAGCAGCAGCAGTCCGAGAGAGAGGAGGAGGGGAAAGG  
AGAGAGGAAAGGGACTCCTTGGGAGACAAGTCCCTCTGCTCAGCGCTTGATGCTAATCCACAGTAGGCGATGTG  
GTGTCTGTCTGCCCTGCCATGCTAGTCTTGCTCTCTCTCTCCTCACGCTCTCAAGAGAAGATGTATCGCACTCC  
ATCTTGACCTCACCAGCTTTGCTTCTCTCTCATGTTGTCTGCTGGGCAGCTGTTTTCAGGCTGGTGTAGTTTCTATAGA  
CAATGAAAACAAAACTGAACCAGGTAGTTCTAGTACTGTATGTACACTGAGAGATGGTTGAATCCGAAATGAATACCTTA  
ACGTTATGATCATCTAAAGTGTGTTGGTGTTTTATCATTTGTCTCACACGTCAAGAATGAAACCAAAATGTGTGAAGGCCTTA  
ACTTAAAGGCTTTTCCCATAGTCTGACTTGCCTAACCCAAATTTGGCATTTTCATGAAACCTAGCATATAAATGCATTT  
GAGCAATGTACGTCAATGCTAGCTCCTGTGACAAATGTTGTGAAATCACATAGCATAAACTCATTGCTCCCTGACCCCT  
CTCTCCCCAGCGATGGAGTTCCATGAGAACCTCCATGACATGGCGGTAAAGGAGGGCTGAAGGGCAGGAAGCTGGCCAA  
GGCTGTGGAGAGCTTACATGGAACATAACTATCCTCAAGGTAAGGATAATGACCACCTAGTTTGTAGTAATCTTTTTTTTT  
TTGACAGTTTTTTAGCTTTTGTGTTAATCTATTTTAGCTACCAATAAACCTGTTTTAAATCGATCTGTGGACACCATAGATCA  
AAATGGCTTGCAATTGAGTGGTAGCCCTGATTCTCAGACACAGGAGTATGTCTCTTCTGCTGTATGAAGCAGGATGTGAA  
ATCTGACACCCTTGCAGCAGGATGTCCTTCACTTTAAATTCGCTCTTCCGACTGTCTATCAACTCCTGTCTGAAGC  
CTAGAGTGCCTCGGAAAGTATTCAGACCCCTTGACTTTTTTACATTTCAATCTACACACAATACCCCAATAATGACAAA  
CGGAAAACAGGTTTTTGAATAATGTTTTGAAAATGTGTTAATAACAAAAACAGATACCTTATTTTTGTAAGTATTCAGAC  
TCTTTGCTATGAGACTCAAAAATTAGCTCAGGTGCATCCTGTTTCCATTATCATCTTTGAGATGTTTCTACACCTTGAT  
TGGAGTCCACTTGTGTAATAATCAATTGATTGGACATGATTTGGAAAGACACACCTGTCTATATAAGGTTCCACAGTTGA  
CAGTGCATGTGAGAGCAAAAACCAAGCCATGAGGTCGAAGGAATTGTCCATGGAGCTCTGAGACAGGATTTGTGTGAGGC  
ACAGATCTGGGGAAGGATTTGAACGATTTCTGACAGATTGAAGGTCCCATGAAACACAGTGGCCTCTATCATTCTTAA  
TGGAAAGAGTTGGAAACCAACCAACCCGGCCAACTGAGCAGGAACCGCCCGGCTAAACTGAGCAATCAGGGAAGGGC  
CTTTGGTAGGGAGATGACCAAGAACCTGATGGTCACTGTGACAGAGCTTAGAGTTCTGTTGGAGACGGGGAACCTT  
CCAGAAAGCACAACCATCTCTGAGCACCTCCACCAATCAGGCCCTTTATGGTAGAGTGGCCAGACGGGAAGACACTCCTCAAT  
AAAAGGCACATGACAGCCCGTTTGGCAAAAAGGCCCTTTGAAGACTCTCAGACCATGAGAAAACAAGATTTCAATGGTCTGAT  
GAAACCAAGATTGAACTCTTTGGCTGAATGCCAAGGCTCACGTCCGAAGGAACCTGGCACCATCCCTGCGGTGAAGTG  
TGGTGGCAGCATAATGCTGTGGGATGTTTTTTCAGCAACAAGGACTGGGAGACTAGTCAGGATCGAGGCAAAAGATGAACG  
GAGCAAAGTACAGAGAGATCCTTAAACGAAAACCTGTCCAGAGCTCTGACTGGGGCGAAGGTTACCTTCTAATAGGACA  
ACAACCTAAGCACACAGCAACCAAGCAGGAGTGGCTCGGGACAGGTCTCTGAATGTCCCTGAGTTGAGTGCCCAAGCCAG  
AGCCCTGACTTGAAGCCAATCTAACAATCTCTAGAGAAACCTGAAAATTTGCTGTGACGCAACGCTGCCATCCCACTGAC  
AGAGCTTGAGAGGATCTGCGGAGAAGAAATGGGAGAACTCCCAAAATACAGGTGTGCCAAGCTTGTAGCGTCATACCCAAG  
AAGACGCCAAAGGTGCTTCAAGAAAGTACTGAGTAAAGGCTGTAATCTTATGTAATATTTCTAAAATAAATTAATAGAT  
TAAACAAAAACACTTTGTGTTGTCTGATGAGATAATAAATAGATGAAAGGCAGTTTCTTACAGGTTTCCAGGGAAGC  
CAAGCTAGCGCTCTGAGAGGCGTTCAAAGCGATGGGGCGATGTTTTGATCGAGAGACCTTTAGAAACTTTGCACATTTTT  
CTCTAACATAAATATACAAATATGTTTTTACAGTTATAAGGAAGGTGAAATCTTAAATGGATTAGAAAAAAATGAAATTT  
TCAAGCCTTATACATAGTTTTGGTTGAATAGGAAATAAATAAATATGATCTGTGTAATTAAGCTTGTTCTCAATAGTG  
ACTACCCCTCTGCAATTTATAACTATTTTTACTAGAAAAAGTGAAGTTTAACTTTGGAGTATGCCGCACTACTAGTTATT  
GTTTTATCTCATGATAAATAAATTACTTTTTGGGGATTACGTAGATTACATTTTTCGATTACATTTAGTTACATGTAAGAGGTT  
TAACCTAATGTTTGTTTTGGAGACAGACATAAGCAGTGAATTTATATCAAGAAACAACCTCAGAGCGAACAACCTTTAGAG  
ATTAATGATTCCACAGTGCAGTTGAGCTTCACTAAATAAGGAAAAAACAATGTTTTTTGAGAGTTTGTCTACAGAGGGAC  
ATAAGGTAGCTAGGTTAAATTTGACATTTGTTTTTTCAGCTGCAGCGCGTGGAAATAAGAGCCTATGTCTGAGCTAGGTTAG  
ATTGCACACACTGTCTGATGTATTTGTCTTTATGCCGTTCAATTTAATCCCTGTGTCAATGCAAGGGTAAATATCGAGGA

ATGACCTCCGCATATTTATTTGTGATATTTGCATGCGTTAATTGCATGCTCACCTCATGAGCGTTTGGGCTCATCATTT  
ATACATGGTCCCCGGGAAATTGAGTTGGTGCCTGGTGTGAGTGTGTTGTCTACGCTGCATAATTCATTATACACAGAAGCAGC  
GGTTACGCTCCGTGGGGATTGGGGAGATGTAGGACTCCAATGTCTGACCGCATACAACCTAAGATTAACAGTTAGTACCA  
CACTACTCTCTCGCTTCGTGGCCTTTTGAAGGTACAATTGGTTTCACCCCTTGTCTTCTGTTTAACTGGAGATTCAA  
GTTGTTGATACATGCTCCATTGTCTCTATATTGCCATTCTGTGATGTCGCTGCCTCCCTCCAGGGCCAGGCGGATCTG  
CTGAAGCACGCAAAGAGTGAGGTCCAGGAGAACCTGAAGCAGATCCACTATGCCGCCCTCACCTGTAACCTCAGTAAGGA  
CGGGCCATCAGGGAGCACGGCAGGCTCCGAGTCCAGGACCCGACCACGCAGCCTGGACGCCATCCCCGAGAAAGCCACGG  
GGGAGACGAGCTCTCTGAGGAGGACAACCTGAAGGCTTACGCCCTAAACCCCTTCATACCTCCAAGCCCCCTGCCCCTACCC  
TAGTGGCACTCAACCCCCCCCCCAAGCCCCTTGCCCTACCCTAGTGGCATAACATAAACCTCCTTACCGCAGTCCCACA  
CAAACCTAACTACAGTATAACTGTTCTAGTGCCGTTGCCACACAACCTTTCTTATTCAGTGCCGTATACAACCATTTCCA  
TTCCACCCCAATCTCACTCAAACCTCCCTTTGCTTAACCAGGTACCACACAAAAAGCCCTTAACCCCTCTGCCCACCT  
CAACGTCCAACAGCAAGATGTTGCGGGTCAACTAGGAGGGTCAAGTGAACCTGCAGCCACGGGACAGTCTTAAAGCAGTG  
ACCTACTGTGGAGACAGTGCCTTATTTACAGGCAGACCCAGGGTCTGACCCTAGGAGAGCTGCTCTAAACGGTCCAAG  
GATTTCTTAAGCACAAATTTATGGGTTTCTTACCAACCAGAAATTAGAGCTGTGAATGTAATAGGAAACAGGAACATTGGA  
GAGAAGGAAAGAAGAAAAGGGAGGCAGAGCTGTTTACAATAATGAACCTGTTCTTGTCTGCCAAAATAGTATGTGTATA  
TATGGAGTTCTGTTACTTTTTTGC AACGTGCTTCATTTTATTATTGTATTCTTGAGAAAATAAGATNNNNNNNNNNNNNN  
NNNNNNNNNNNNNNNNNNNNNNNNNNNNNNNNNNNNNNNNNNNNNNNNNNNNNNNNNNNNNNNNNNNNNNNNNNNNNN  
NNNNNNNNNNNNNNNNNNNNNNNNNNNNNNNNNNNNNNNNNNNNNNNNNNNNNNNNNNNNNNNNNNNNNNNNNNNNNN
