# Supplementary material for: Comprehensive analysis of MHC class II genes in teleost fish genomes reveals dispensability of the peptide-loading DM system in a large part of vertebrates
Source: PubMed Central journal article supplement (PMC4219347; doi:10.1186/1471-2148-13-260), 2013-11-26
Supplement: 1471-2148-13-260-S10.pdf [file 1471-2148-13-260-S10.pdf]

## Supplementary Text 4 (Text S4): MHC class II domain sequence alignments

| Table of Contents |                                                      | Page |
|-------------------|------------------------------------------------------|------|
| Figure legend     |                                                      | 1    |
|                   | MHC class II alpha sequence references               | 2    |
|                   | MHC class II beta sequence references                | 3    |
| Text S4A          | Alpha 1 domain sequence alignment                    | 4    |
| Text S4B          | Beta 1 domain sequence alignment                     | 7    |
| Text S4C          | Alpha 2 domain sequence alignment                    | 10   |
| Text S4D          | Beta 2 domain sequence alignment                     | 13   |
| Text S4E          | Transmembrane and cytoplasmic domains alignment      | 17   |
|                   | (a) MHCII $\alpha$ transmembrane/cytoplasmic domains | 17   |
|                   | (b) MHCII $\beta$ transmembrane/cytoplasmic domains  | 17   |

### Figure legend:

Alignments of deduced amino acid sequences of MHC class II  $\alpha$ 1 domains (Text S4A),  $\beta$ 1 domains (Text S4B),  $\alpha$ 2 domains (Text S4C),  $\beta$ 2 domains (Text S4D) and transmembrane/ cytoplasmic domains (Text S4E) of teleost fish and other vertebrates. Also some sequences encoded by pseudogenes and/or genes that are only known partially are shown (both types with “X”), as they also may contain information on family history. Further, it is indicated which genes were found highly expressed in the present study (high). Names shaded pink, blue and green belong to teleost MHC class II groups DA, DB and DE, respectively. In the sequences, basic residues are depicted in red font, acidic residues in blue font, and green font residues are more hydrophilic than the orange ones [Hopp TP, Woods KR (1981) Prediction of protein antigenic determinants from amino acid sequences. *Proc Natl Acad Sci USA* 78(6):3824-3828]; cysteines are in purple font. Numbers between brackets in the alignment figures refer to the sequence reference lists (pages 2-3), which provide the species common name, species Latin name, gene name (if given), and database accession.

Text S4A-to-D: Above the alignment interesting motifs that are found in some of the aligned sequences are indicated. Yellow shaded asparagine and histidine residues in the  $\alpha$ 1 and  $\beta$ 1 domain alignments are highly conserved in classical MHC class II for interaction with the backbone of the peptide ligand [Painter CA, Stern LJ (2012) Conformational variation in structures of classical and non-classical MHCII proteins and functional implications. *Immunol Rev* 250(1):144-157] (see also Additional file 6, Table S3). Pink shaded serine and glutamic acid residues in the  $\beta$ 2 domain can interact with CD4 [Wang XX, et al. (2011) Affinity maturation of human CD4 by yeast surface display and crystal structure of a CD4-HLA-DR1 complex. *Proc Natl Acad Sci USA* 108(38):15960-15965] and are highly conserved throughout classical tetrapod MHC class II. The aqua-color shaded tryptophan residue in the  $\alpha$ 1 domain alignment (W43) is critical in classical MHC class II for allowing DM assistance in peptide loading, a function for which in DM the tan-color shaded asparagine residue in the  $\alpha$ 2 domain alignment (N125) is involved [Pos W, et al. (2012) Crystal structure of the HLA-DM-HLA-DR1 complex defines mechanisms for rapid peptide selection. *Cell* 151(7):1557-1568]. Conserved N-glycosylation motifs are shaded gray. The downward arrowhead in Text S4D corresponds with the position where the DA-lineage  $\beta$ 2 domain coding sequences in neoteleost fishes are separated by an unusual intron [first reported by: Ono H, et al. (1993) Exon-intron organization of fish major histocompatibility complex class II B genes. *Immunogenetics* 38(3):223-234] providing evidence that they are monophyletic and derived from a single gene ancestor in an early neoteleost. Deduction based on available information and parsimony suggests that the S3 genomic region (main text Fig. 2) was the genomic site of this neoteleost gene ancestor.

Text S4E: Alignment of transmembrane and cytoplasmic domain regions of MHC class II  $\alpha$  (a) and II  $\beta$  (b). These small domains are difficult to predict reliably from genomic sequences, and therefore we did not attempt to make a comprehensive analysis of teleost molecules. Only a few sequences are compared in order to show principles. For all presented sequences cDNA information is available, except for those of gar (\*). Cart., cartilaginous fish classical type. T.cl., tetrapod classical type. Putative transmembrane regions are underlined according to prediction by TMPRED software ([http://www.ch.embnet.org/software/TMPRED\\_form.html](http://www.ch.embnet.org/software/TMPRED_form.html)).

Classical MHC class II molecules are co-transported to MHC class II loading compartments by binding to invariant chain and do not have proper endosomal sorting motifs themselves. In contrast, DM molecules are transported to these compartments due to their YXX $\Phi$  motif (X can be any residue,  $\Phi$  denotes a hydrophobic residue) in the DMB cytoplasmic tail [Lindstedt R, et al. (1995) The MHC class II molecule H2-M is targeted to an endosomal compartment by a tyrosine-based targeting motif. *Immunity* 3(5): 561-572.]; in the figure these tyrosine-based motifs are shaded yellow. Other endosomal sorting motifs contain “dileucine”(-similar) motifs LL, IL, or LI, for which an acidic residue positioned several residues N-terminal thereof is important for efficiency [Kozik P, et al. (2010) A screen for endocytic motifs. *Traffic* 11(6):843-855]; such motifs are shaded green in the alignment figures. However, although such motif in the DOB cytoplasmic tail has been demonstrated to be functional, transport of DO molecules importantly depends on their interaction with DM [Brunet A, et al. (2000) Functional characterization of a lysosomal sorting motif in the cytoplasmic tail of HLA-DObeta. *J Biol Chem* 275(47):37062-37071].

Gray and blue shading are used to show two conserved sets of small residues glycine, alanine, serine, or cysteine, positioned seven residues apart (presumably positioned above each other at approximately two complete helical turns, forming one side of the helix), which maybe be involved in helix packing and binding between the MHC class II  $\alpha$  and  $\beta$  chains [Cosson P, Bonifacino JS (1992) Role of transmembrane domain interactions in the assembly of class II MHC molecules. *Science* 258(5082):659-662; Moore DT, et al. (2008) Protein-protein interactions in the membrane: Sequence, structural and biological motifs. *Structure Review* 16(7):991-1001]

Pink shading is used to show an ancestral MHC class II  $\beta$  cytoplasmic tail motif which was not previously reported, consisting of a glycine encoded by an intron-interrupted codon and a proline five residues C-terminal thereof.

### **MHC class II alpha sequence references**

- (1) Atlantic salmon, *Salmo salar*, DAA\*0101, GenBank L77086
- (2) rainbow trout, *Oncorhynchus mykiss*, DAA\*0101, GenBank CAB96450
- (3) Arctic char, *Salvelinus alpinus*, DAA, GenBank ACI05079
- (4) Zebrafish, *Danio rerio*, 1.3.4, GenBank AAA16368
- (5) Zebrafish, *Danio rerio*, 11.2, GenBank AAA72019
- (6) Common carp, *Cyprinus carpio*, DXA1\*01, GenBank CAA64707
- (7) Atlantic herring, *Clupea harengus*, DAA\*0101, GenBank CAM34665
- (8) Three-spined stickleback, *Gasterosteus aculeatus*, DAA\*01, GenBank AAU01917
- (9) Three-spined stickleback, *Gasterosteus aculeatus*, DBA\*01, GenBank AAU01919
- (10) Nile tilapia, *Oreochromis niloticus*, DBA\*s01, GenBank AAF66843
- (11) Fort Maguire Aulonocara, *Aulonocara hansbaenschi*, DCA\*s01, GenBank AAF65681
- (12) Nile tilapia, *Oreochromis niloticus*, DAA\*0101, GenBank AF214705
- (13) Zebrafish, *Danio rerio*, DCA, GenBank AL591180
- (14) Red seabream, *Sparus aurata*, EST sequence, GenBank AM965522
- (15) Common carp, *Cyprinus carpio*, GSS sequence, GenBank HN151524
- (16) Japanese loach, *Misgurnus anguillicaudatus*, EST sequence, GenBank BJ838834
- (17) White sturgeon, *Acipenser transmontanus*, EST sequence, GenBank DR975335
- (18) Little skate, *Leucoraja erinacea*, EST sequence, GenBank FL670178

- (19) Nurse shark, *Ginglymostoma cirratum*, pS $\alpha$ 5-1, GenBank AAA49311
- (20) Coelacanth, *Latimeria chalumnae*, Ensembl LatCha1 scaffold JH122224
- (21) African clawed frog, *Xenopus laevis*, DAAf1, GenBank AF454374
- (22) Chicken, *Gallus gallus*, B-LA, GenBank AAR14673
- (23) Human, *Homo sapiens*, HLA-DQA1, GenBank AAA59758
- (24) Human, *Homo sapiens*, HLA-DRA1, GenBank NP\_061984
- (25) Mouse, *Mus musculus*, H2-DOA, GenBank AAB46387
- (26) Human, *Homo sapiens*, HLA-DOA, GenBank AAA60075
- (27) African clawed frog, *Xenopus laevis*, DMA, GenBank AAH61681
- (28) Anole lizard, *Anolis carolinensis*, Ensembl AnoCar2.0 Chr.4
- (29) Chicken, *Gallus gallus*, BMA1, GenBank CAA18966
- (30) Human, *Homo sapiens*, HLA-DMA, GenBank CAA54170

### **MHC class II beta sequence references**

- (31) Atlantic salmon, *Salmo salar*, DAB\*0101, GenBank CAA49725
- (32) Rainbow trout, *Oncorhynchus mykiss*, DAB\*1602, GenBank AF115531
- (33) Arctic char, *Salvelinus alpinus*, DAB, GenBank ACI05078
- (34) Zebrafish, *Danio rerio*, DAB1\*01, GenBank AAA50043
- (35) Zebrafish, *Danio rerio*, DAB2\*01, GenBank AAA50044
- (36) Zebrafish, *Danio rerio*, DAB3\*01, GenBank AAA50045
- (37) Zebrafish, *Danio rerio*, DAB4, GenBank AAA87891
- (38) Zebrafish, *Danio rerio*, DDB, GenBank AAA87893
- (39) Zebrafish, *Danio rerio*, DEB, GenBank AAA87895
- (40) Zebrafish, *Danio rerio*, DFB, GenBank AAA87892
- (41) Common carp, *Cyprinus carpio*, DAB4\*01, GenBank CAA64709
- (42) Three-spined stickleback, *Gasterosteus aculeatus*, DAB\*01, GenBank AAU01918
- (43) Three-spined stickleback, *Gasterosteus aculeatus*, DBB\*01, GenBank AAU01920
- (44) Medaka, *Oryzias latipes*, DAB, GenBank BAA94279
- (45) Medaka, *Oryzias latipes*, DBB, GenBank BAA94280
- (46) Medaka, *Oryzias latipes*, DCB, GenBank BAA94282
- (47) Pigmy swordtail, *Xiphophorus pygmaeus*, DXB\*01, GenBank AAS55044
- (48) Zebrafish, *Danio rerio*, DBB, GenBank BRU08869
- (49) Zebrafish, *Danio rerio*, DCB, GenBank AAA87894
- (50) Fathead minnow, *Pimephales promelas*, EST sequence, GenBank DT151632
- (51) Mississippi paddlefish, *Polyodon spathula*, DAB\*01, GenBank ACZ26346
- (52) Mississippi paddlefish, *Polyodon spathula*, DAB\*02, GenBank ACZ26347
- (53) Mississippi paddlefish, *Polyodon spathula*, DAB\*03, GenBank ACZ26348
- (54) Pacific electric ray, *Torpedo californica*, EST sequence, GenBank EW694773
- (55) Nurse shark, *Ginglymostoma cirratum*, clone 11, GenBank L20274
- (56) Coelacanth, *Latimeria chalumnae*, Ensembl LatCha1 scaffold JH135383
- (57) African clawed frog, *Xenopus laevis*, DAB, GenBank BAA08759
- (58) Chicken, *Gallus gallus*, B-LB, GenBank AAA48948
- (59) Human, *Homo sapiens*, HLA-DQB\*05011, GenBank AAQ88039
- (60) Human, *Homo sapiens*, HLA-DRB1\*010101, GenBank CAM34749
- (61) Mouse, *Mus musculus*, H2-DOB, GenBank AAI27028
- (62) Human, *Homo sapiens*, HLA-DOB, GenBank CAG46631
- (63) African clawed frog, *Xenopus laevis*, DMB, GenBank ABB85336
- (64) Anole lizard, *Anolis carolinensis*, Ensembl AnoCar2.0 Chr.4
- (65) Chicken, *Gallus gallus*, BMB2, GenBank CAA18967
- (66) Human, *Homo sapiens*, HLA-DMB, GenBank AAB60387

**Text S4A: Alpha 1 domain sequence alignment**

|                          |      | W43                                                         |    |
|--------------------------|------|-------------------------------------------------------------|----|
| salmon DAA (1)           | high | 1:VLHID-LVITGCSDS-----GLDMYGLDGEEMWYADFNKQ-----EGVVALPP     | 43 |
| trout DAA (2)            |      | 1:VLHTD-IYINGCSDS-----GVDYGLDGEELWYADFNKK-----EGVVALPP      | 43 |
| Arctic char DAA (3)      |      | 1:LLHID-LYIAGCSDS-----GVDYGLDGEELWYADFNKK-----EVVMPLPP      | 43 |
| D8.35 A1                 |      | 1:IVHDY-FSIHGCSYTDDEEGMAVDGEDMHGIDNEEMWHADYNLK-----TGVLSLPD | 51 |
| D8.35 A2                 | high | 1:VVHED-FAIRGCSDE-----KEDTYGMDEEELWHADFNKQ-----KGVETLPD     | 43 |
| D8.37 A1                 |      | 1:FEHEV-NQIQVCSNTE-----QEFFIGYDGEELWYADIAHR-----RGVKTTPS    | 43 |
| D8.37 A2                 |      | 1:FVREE-LEIYVCSDE-----SEAMVGADGEELWYADFNKQ-----TGIIITLPD    | 43 |
| D8.37 A3                 | high | 1:AEHKD-FGFVGCSDME-----KEFLFGFDGEELFHLDFIRK-----EGVATAPD    | 43 |
| D8.37 A4                 | high | 1:AEHRD-FQFTGCSDE-----KDDLNGFDGEVLYYDFIRK-----EGVVIAPD      | 43 |
| D4 A                     |      | 1:VKHNL-FMFNGCSDE-----KEALYGESEEMWHSDFKLN-----QGVATLPE      | 43 |
| zebrafish (4)            |      | 1:AEHRD-VDFFGCSDE-----KEYLQGFGEELYHSDFIRK-----VGVTAPD       | 43 |
| zebrafish (5)            |      | 1:VVHED-IVMDGCSDE-----KEYISVLDGEEMWYDFSGK-----RGMETLPD      | 43 |
| carp DXA (6)             |      | 1:VVNRD-VQFVGCSDTE-----REFLIGFDGEELWYADFNKQ-----EGVTVTPD    | 43 |
| Atlantic herring DAA (7) |      | 1:IVHVD-IALVGCSDSD-----GKMFGLDGEELWYADFNKQ-----KFIMTLPD     | 43 |
| G131 A1                  | high | 1:GPHKD-IAIVGCSDS-----GEEYGLDGEVWYADFNKQ-----KGVRPQPS       | 43 |
| G131 A2                  |      | 1:GPHKD-IRVLGCSDS-----GENMFGLDGEVWYADFNKQ-----KGVRLPSP      | 43 |
| G131 A3                  |      | 1:GPHKD-IAIDGCSDS-----GKMYGLDGEVWYADFNKQ-----KGVKQPPS       | 43 |
| GVII A                   |      | 1:VPHEA-IRISGCSDS-----GEEFGLDGEELWYADFNKQ-----KGVSLPSP      | 43 |
| stickleback DAA (8)      |      | 1:GPHRD-IAITGCSDS-----GEDMYGLDGEELWYADFNKQ-----KGVKQPPS     | 43 |
| stickleback DBA (9)      |      | 1:GPHED-FAITGCSDS-----GEFMYGLDGEELWYADFNKQ-----KGVKQPPS     | 43 |
| M3 A                     |      | 1:VLHED-FGILGCSYD-----QEYMYALDGEELWYADFNKQ-----TGVPQLP      | 43 |
| M615 A                   |      | 1:VFHED-FQITGCSYD-----EEFMVNLGEEIVYDFKKN-----TEVDAQPS       | 43 |
| M873 A                   | high | 1:VFHED-LAITGCSDS-----GEDMYALDGEVWYADFNKQ-----TGVEPQPP      | 43 |
| F402 A                   |      | 1:-QHED-IRILGCSDL-----GEFMYGLDSEEVWYADFNKQ-----EGVDINPP     | 30 |
| F713 A                   | X    | 1:-QHKD-INIVGCSDL-----GEFMYGLDSEELWYADFNKQ-----EGVYGTTP     | 42 |
| F7533 A                  |      | 1:SQHKD-IGIVGCSDL-----GEFMYGLDSEELWYADFNKQ-----EGVYGTTP     | 43 |
| F7721 A                  |      | 1:SQHKD-IRITGCSDL-----GEDMFGLDSEELWYADFNKQ-----EGVDGTTP     | 43 |
| T19 A                    |      | 1:GQHED-IRIVGCSDF-----GEYMHGLDGEELWYADFNKQ-----EGVYQPPD     | 43 |
| T55 A                    |      | 1:GQHED-IRIVGCSDF-----GEYMYGLDGEELWYADFNKQ-----EGVYQPPD     | 43 |
| T61 A                    |      | 1:GRHED-VHIVGCSDF-----GEDMYGLDGEERWYADFNKQ-----EGVYALPD     | 43 |
| O1 A                     |      | 1:FLHED-IHIVGCSSEN-----GEVMFGLDGEELWYADFNKQ-----IGVSPQPS    | 43 |
| O18 A1                   |      | 1:VLHED-IGIVGCSDS-----GEDMYGLDGEVRYADFNKQ-----EDINSLPP      | 43 |
| O18 A2                   |      | 1:ALHSD-IAINGCSDS-----GEFMYGLDGEELWYADFNKQ-----TGVDAPPD     | 43 |
| O18 A3                   |      | 1:PLHSD-IAIGGCSSES-----GENMYGLDGEELWYADFNKQ-----EFIYQPPD    | 43 |
| O22 A1                   |      | 1:GLHET-SSVSGCSDS-----GEDVLILDDEVVWYADFNKQ-----KGVDSLPA     | 43 |
| O22 A2                   | X    | 1:-LYEM-NSVSGCSDT-----GENVLILDDEVVWYADFNKQ-----KGVDSLPA     | 42 |
| O22 A3                   | X    | 1:-LYEM-NSVSGCSDT-----GEDVLILDDEVVWYADFNKQ-----KGVDSLPA     | 42 |
| O22 A4                   | X    | 1:-LHET-NSISGCSDT-----GEDALILDDEVVWYADFNKQ-----TGVDSLPA     | 42 |
| O22 A5                   | X    | 1:-LYEM-NSVSSCSDT-----GEDVLILDDEVVWYADFNKQ-----KGVDSLPA     | 42 |
| O22 A6                   | X    | 1:-LYEM-NSVSSCSDT-----GEDVLILDDEVVWYADFNKQ-----KGVDSLPA     | 42 |
| O31 A3                   |      | 1:SLHTD-IHIVGCSDFN-----GEVMFGLDREELWYADFNKQ-----MDVYPQPP    | 43 |
| O31 A4                   |      | 1:ALHTD-IHIVGCSDFN-----GEVMFGLDREELWYADFNKQ-----MGVSPQPS    | 43 |
| O39 A                    | X    | 1:GLHGD-VHINGCSDF-----AEDMYGLDGEVAYADFNKQ-----TEVYILPP      | 43 |
| O42 A                    |      | 1:GLHGD-VHINGCSDF-----AEDMYGLDGEVAYADFNKQ-----TEVYILPP      | 43 |
| O79 A1                   |      | 1:DAHGS-NFIIGCSAD-----GENVLILDDEAVWYADFNKQ-----TGVNALPA     | 43 |
| O79 A3                   |      | 1:ALHGD-NWISGCSDT-----GEAVLILDDEAVWYADFNKQ-----EGIYPLPP     | 43 |
| O745 A                   |      | 1:PLHSD-IAVGGCSSES-----EENMYGLDGEELAYDFNKK-----EEIYPLPP     | 43 |
| O845 A                   |      | 1:GLYEM-NSVSGCSDT-----GEDVLILDDEVVWYADFNKQ-----KGVDSLPA     | 43 |
| tilapia DBA (10)         |      | 1:GQHTD-INIVGCSDF-----GEVYGLDGEELWYADFNKQ-----IGVYQPPD      | 43 |
| A.hansbaenschi DCA (11)  |      | 1:ALHTD-IHVVGCSYIH-----GGVMFGLNREELWYADFNKQ-----MDVYPQPP    | 43 |
| salmon DBA               |      | 1:IHHEI-HFIFGCFESS-----DPAVGLIDGDEVFYGFNKNSTCLIADVFTLPK     | 51 |
| GXVII A                  |      | 1:SSHDF-HYTYGCEYS-----EVRVDVLLDGDVVAYADFGRE-----EVVFLIPR    | 44 |
| M5 A                     |      | 1:PRHMF-HFIYGCYETD-----EVRVDLVVDDDTIGYADFTKQ-----EMVCLPY    | 44 |
| O97 A                    |      | 1:QSHNF-HYIYGCYESD-----DVRVDVAVDDDVVAYADFNKE-----EVVVLPH    | 44 |
| salmon DCA               |      | 1:IPHET-VYVLGCKLEKT-----KVKAEEALQLDGEVWYADFNKQ-----QEVTLPE  | 46 |
| M16 A                    |      | 1:VEHEI-SYFIGCPAEG-----STEVLLDFDSEELWYADFNKQ-----AVVFTGPS   | 44 |
| O29 A3                   |      | 1:IPHEM-TYVVGCFVQG-----LDEVQFEFDGEEFLYADFPKE-----EIVYTVPK   | 44 |
| O9 A                     |      | 1:AVHEE-TLFYSCSESG-----DGQVQLHYDGDQITYADFNKQ-----HAVVTAPL   | 44 |
| O33 A                    |      | 1:GRHTL-CHIYGCDFSS-----DTQICAAFDEEVYADFNKQ-----ELIYESKI     | 44 |
| O57 A                    |      | 1:GSIKL-CYTFGCFKSS-----DTQVCLTMDGDEVFYANFNKQ-----SLIYDSKI   | 44 |

|                       |                                                              |    |
|-----------------------|--------------------------------------------------------------|----|
| D8.45 A1              | 1:SYPEF-GFIETCRGSS-----YDKIVFILDTEEAAYKDIKE-----KLVFTLPD     | 44 |
| D8.45 A2              | 1:MDLEY-GLMESCTGSP-----DDEIVFTFNTELAAYLVVVDG-----TLVLTVPN    | 44 |
| zebrafish DCA (13)    | 1:MDLEY-GLMESCTGSP-----DDEIVFTFNTELAAYLVVVDG-----TLVLTVPN    | 44 |
| D8.46 A               | 1:DYHKY-GLIGACGDAD-----QEDFIVQFDDEQLAHVDFKEQ-----KDVITLPE    | 44 |
| D18 A X               | 1:DYHKY-GLIGASGDAD-----QEDFIVQFDDEQLAHVDFKEQ-----KDVITLPE    | 44 |
| salmon DDA            | 1:EQHVF-NVINTRSETE-----EFNMTIVVDDNEYLVHVLNNK-----EGVVTLPE    | 44 |
| spotted gar 501 A2    | 1:TSHLD-INVIGCKSDDP-----VAQDEAQLDGDDEMFYADFDDK-----EMILTLPA  | 45 |
| salmon DEA            | 1:SKHLL-RFLTFCQKNVP-----SDEEYDVEFDGDELFLYVDPITY-----QVERRLSE | 46 |
| seabream DEA (14)     | 1:-----KPPDIEFDGDELLYLDPVTY-----QAVQRLPE                     | 29 |
| spotted gar 615 A     | 1:IRHLD-RLLTFCVSNST-----EAELEKEHDEDEIFVVDLETK-----QSVQRLPE   | 45 |
| sturgeon (17)         | 1:VTHLF-RALVACQTNGT-----LPEDDYELDDDELPHIDFDKK-----EAVQRIPE   | 45 |
| spotted gar 501 A1    | 1:VEHTY-EVAYFCQSENK-----KGSRNEVFDDEMFHIDPDRK-----VDEPRLPE    | 45 |
| little skate (18)     | 1:YRHEE-HLVYLVQDQSP-----DKQFDMLVDDDEVFYMDFKLK-----KEVARIPE   | 45 |
| nurse shark (19)      | 1:YLYDF-TQVYFVQQRSP-----EKHFDVMEDGDEIFYMDFNLK-----KEVARIPE   | 45 |
| coelacanth (20)       | 1:TSLLY-DKTLVCQTAEP-----KVQFNWEIDDELVRVDIDKQ-----KMERLPE     | 45 |
| Xenopus DAA (21)      | 1:VDYFD-YGAMFYQSYGP-----SGEYLFDYEGNEMPHVDLESK-----SVVITLPG   | 45 |
| chicken BLA (22)      | 1:KPHVL-LQAEFYQRSEG--PDKAWAQFGFHFDADELPHVLDAA-----QTVLRLPE   | 49 |
| human DQA (23)        | 1:ADHVASCNVLYQFYGP-----SGQYTHEFDGDEQFYVDLERK-----ETAIRWPE    | 46 |
| human DRA (24)        | 1:EEHVI-IQAEFYLNPDQ-----SGEFMFDFDGDEIFHVDMAKK-----ETVIRLEE   | 45 |
| mouse DOA (25)        | 1:ADHMGSYGPAFYQSYGA-----SGQFHEFDGDEQIFSVDLKNE-----EVRRLPE    | 46 |
| human DOA (26)        | 1:ADHMGSYGPAFYQSYGA-----SGQFHEFDGDEQIFSVDLKKS-----EAVIRLPE   | 46 |
| Xenopus DMA (27)      | 1:QDHSI-KQVLFQCPQSP-----SPVLLKMFDEEQMFQYNFADK-----SVVPRIPN   | 45 |
| anole lizard DMA (28) | 1:PAHLF-SEVFFCQPGDP-----SLGLAQALDQEPLFRFNFTSQ-----QWRSILPE   | 45 |
| chicken DMA (29)      | 1:SLHTL-SEVLFQCPDTP-----SLGLSVAFDSEQLFSFDVPNS-----QWLPLQPD   | 45 |
| human DMA (30)        | 1:QNHTF-LHTVYQDQSP-----SVGLSEAYDEDQLFFDFSQN-----TRVPRLPE     | 45 |

|                          |                                                            |  | N62 | N69 | NxS/T | NxS/T |    |
|--------------------------|------------------------------------------------------------|--|-----|-----|-------|-------|----|
| salmon DAA (1) high      | 44:FA-----DPFTF---PGF-YEQAVGNQGVCKGNLAKCIKAY---KNP-EEKI    |  |     |     |       |       | 82 |
| trout DAA (2)            | 44:FA-----DQISF---PGY-YEQAVGNQRTCKGDLGVDIKAY---KNP-PETI    |  |     |     |       |       | 82 |
| Arctic char DAA (3)      | 44:FA-----DPFTY---PGA-YEQAVGNQGACKANLATSIKAY---KNP-PETI    |  |     |     |       |       | 82 |
| D8.35 A1                 | 52:FG-----DPITF---PRF-YETSVIEMTGCKANIVSLTKIF---NSP-PPEM    |  |     |     |       |       | 90 |
| D8.35 A2 high            | 44:FG-----DPMTF---PGF-YEGSEGEMAVCKSNLALRIKGF---KSP-PPEM    |  |     |     |       |       | 82 |
| D8.37 A1                 | 44:FA-----QYAVI---PDI-YERALAFLDCKYDLHAYIKYF---NNP-PPEM     |  |     |     |       |       | 82 |
| D8.37 A2                 | 44:FA-----DRIGF---PGF-YEISVDSIAGCRRLANNIRGF---KSP-PPAM     |  |     |     |       |       | 82 |
| D8.37 A3 high            | 44:FA-----DPLSF---PGF-YEAGVAQMEVCKQNLATDIRAY---NSP-QEQL    |  |     |     |       |       | 82 |
| D8.37 A4 high            | 44:FA-----DPLSF---PGG-YETGVAQMEVCKQNLATDIKAY---NSP-QEQL    |  |     |     |       |       | 82 |
| D4 A                     | 44:FA-----DPLSF---PGA-YEESVADQEVCKQNLATSIKAY---NSP-PEEM    |  |     |     |       |       | 82 |
| zebrafish (4)            | 44:FA-----DPMSY---PGF-YENSVQMEVCKQDLATDIKAY---NSP-EEQL     |  |     |     |       |       | 82 |
| zebrafish (5)            | 44:FA-----DPFTY---PGT-YEQSLADYETCKHLDVAAKAY---KSP-LEKL     |  |     |     |       |       | 82 |
| carp DXA (6)             | 44:FA-----DPIGF---PGF-YETGVALMEVCKQNLALNIKVY---KPT-DEQL    |  |     |     |       |       | 82 |
| Atlantic herring DAA (7) | 44:FA-----DPFKY---EEGA-YEGAVRDKEVCKQNLQVAIQAY---KSP-AEAE   |  |     |     |       |       | 83 |
| G131 A1 high             | 44:FV-----DPIDY---REGTYETAVGNQQICRNNLKIIDLKAF---KDF-PLEK   |  |     |     |       |       | 83 |
| G131 A2                  | 44:FV-----DPIEF---PGGAYEQAVTDLQICRNNLKTHTVKGL---KDV-PLEK   |  |     |     |       |       | 83 |
| G131 A3                  | 44:FV-----DPIDY---PAGAYELAVANQQTCRNDLKTDLLEAY---KDV-PLEK   |  |     |     |       |       | 83 |
| GVII A                   | 44:FL-----DPITY---PGG-YEVAVAEQQFCRNNLRIDLEAY---K-F-PLER    |  |     |     |       |       | 81 |
| stickleback DAA (8)      | 44:FV-----DPIEF---QEGTYELAVGNQQICRNNLKNRLKGL---KDV-PLEK    |  |     |     |       |       | 83 |
| stickleback DBA (9)      | 44:FV-----DPIDY---QEGAYESAVANQQICRNNLKTHTVKVF---KDV-PLEK   |  |     |     |       |       | 83 |
| M3 A                     | 44:LG-----GHFIN---PDG-YQFAKVEVQVCRNNLKALKKTT---KGL-QLEQ    |  |     |     |       |       | 82 |
| M615 A                   | 44:FV-----GHITY---AGG-YGATVLELQGCRRNDLEVIREF---KDL-PLKQ    |  |     |     |       |       | 82 |
| M873 A high              | 44:FV-----DHVSY---PGG-YEQAVANQQICRNNLKIISRIAM---KDL-PLER   |  |     |     |       |       | 82 |
| F402 A                   | 31:FI-----DPITY---EEGA-YSSAVADLQTCCKTSLDITRKSLL---KDM-PPER |  |     |     |       |       | 70 |
| F713 A X                 | 43:FI-----DPFRY---EEGV-YSQAVTELOTCCKTNLDSERKAY---KDM-PPET  |  |     |     |       |       | 82 |
| F7721 A                  | 44:FI-----DPVRF---EGF-YSTAVTNLQICKSNMDEVVRKGN---KDM-PPET   |  |     |     |       |       | 82 |
| F7533 A                  | 44:FI-----DPFR---PTA---AAVADLQTCCKYNLDDVDRKGN---KDM-PTET   |  |     |     |       |       | 79 |
| T19 A                    | 44:FI-----DPIKY---EGF-YSTAVAVLQICKFNLGIFRKGY---KDM-PREL    |  |     |     |       |       | 82 |
| T55 A                    | 44:FI-----DPLKY---AEDP-YSLAVATLQMKCFNLGIFRKGY---KDM-PREL   |  |     |     |       |       | 83 |
| T61 A                    | 44:FV-----DPLKF---PEGT-YEQAVADQQICKINLGISRKGNN---KDM-PREL  |  |     |     |       |       | 83 |
| O1 A                     | 44:FV-----DPISF---GDGA-YETAVINLYICKTNMQVSEQEM---KDY-PLNH   |  |     |     |       |       | 83 |
| O18 A1                   | 44:FA-----DLITC---PGC-YEQAVANQQVCKQNLQTLRKM---KDY-PLNH     |  |     |     |       |       | 82 |
| O18 A2                   | 44:FI-----GSFNY---QEGA-YENAVANQQICRANLKVDSKGM---KDF-PLNH   |  |     |     |       |       | 83 |
| O18 A3                   | 44:FI-----DPITV---PGG-YESSVAFQHSORENMKLFKGM---KDY-PPEQ     |  |     |     |       |       | 82 |
| O22 A1                   | 44:FA-----DHPHW---KDKM-YEQAVVNNQICRYNLKMMARTAM---KDF-PKQR  |  |     |     |       |       | 83 |
| O22 A2 X                 | 43:FA-----DHPGF---EGK-YEEAVANQQICRQNLKMMARLAM---KDF-PKE-   |  |     |     |       |       | 80 |

|                         |   |                                                            |    |
|-------------------------|---|------------------------------------------------------------|----|
| O22 A3                  | X | 43:FA-----DHPGF---EGK-YEEAVANQQICRQNLKMMARMAM---KDF-P---   | 78 |
| O22 A4                  | X | 43:FA-----DHPHW---QEGM-YEEAVANQQICRQNLKMARSAM---KDF-PKER   | 82 |
| O22 A5                  | X | 43:FA-----DHPSF---EGK-YEEAVANQQVCRQNLKQVARTAM---KDF-PKE-   | 80 |
| O22 A6                  | X | 43:FA-----DHPSF---EGK-YEEAVANQQVCRQNLKQVARTAM---KDF-PKE-   | 80 |
| O31 A3                  |   | 44:FI-----DPISF---GDGA-YETAVSNLYTCRQLLQLSRQGM---KDY-PPLR   | 83 |
| O31 A4                  |   | 44:FI-----DPISF---GAGA-YKTAVSNLNTCRQNLQITREGI---KDF-PPLR   | 83 |
| O39 A                   | X | 44:FA-----EPMIY---PGA-YKQAVTELKVCRHNLKALRAVM---KDY-PSNN    | 82 |
| O42 A                   |   | 44:FA-----EPMIY---PGA-YKQAVTELKVCRHNLKALSVM---KDY-PSNN     | 82 |
| O79 A1                  |   | 44:FV-----DPISF---PGF-YEEAVADQQICKQNLMTVRKAM---KDF-PKEL    | 82 |
| O79 A3                  |   | 44:FV-----DPITF---PGQ-YEQAVANQQICRANLKVTRQAM---KDV-PKEL    | 82 |
| O745 A                  |   | 44:FI-----DPITY---GEDA-YESSVAFQKTCRKNMKQFEGM---KDF-PPEQ    | 83 |
| O845 A                  |   | 44:FA-----DHPSF---EGK-YEEAVANQQICRQNLKMMARTAM---KDF-PKQH   | 82 |
| tilapia DBA (10)        |   | 44:FVV-----NPFHY---QEGT-YEGAVTNVQVCQNALKIVREAM---KDF-PPKH  | 84 |
| A.hansbaenschi DCA (11) |   | 44:FV-----QPISF---GDGA-YNIAVANLYGCRQFLQLSETAM---KDF-PPRR   | 83 |
| salmon DBA              |   | 52:FI-----SITPED---KERA-CEYATISRVWCKDCIAWGKQSE---PKI-PKIK  | 92 |
| GXVII A                 |   | 45:L-----PPFLRD LKKLG-YEFAKSSFTHCRSVLAKAKRAS---PNV-TIPQ    | 85 |
| M5 A                    |   | 45:V-----PPSGKDLKEEA-FKFAKNSIANCHSVLAKAKKAD---HGT-PLRQ     | 85 |
| O97 A                   |   | 45:L-----PQPAKDFKKMA-YGVAKASTAHCHSVLGKAKNAD---PGA-PLRQ     | 85 |
| salmon DCA              |   | 47:FL-----GPFSSSTVRNF-YKNAVKGRRLCDALALWIFEE---KSP-PEVK     | 88 |
| M16 A                   |   | 45:FFKANLSERIQGL---TT-YKNGKKNRIWCQLA-DQYFTA---ETE-ERDK     | 86 |
| O29 A3                  |   | 45:FIFDPSHVLVGL---SI-LKDALDNRDWCLIIITKIAAMEE---KYP-PEEK    | 88 |
| O9 A                    |   | 45:L-----KDLETAI LSWF-FPLALDSRTRCFYLDRAVRLD---NSS-MTL-     | 84 |
| O33 A                   |   | 45:P-----ISFHLF---DA-YKYAVFYRSMCKNDIYR-WKPD---KSV-IKKK     | 81 |
| O57 A                   |   | 45:P-----TAFHVP---YA-YSQALYSQRQCRDFVHDDWKQH---KTI-MNTK     | 82 |
| D8.45 A1                |   | 45:MAN----PQYSLN---DL-RLNDVGI PAFCTE IYHKILSLN---VSEDEPL   | 85 |
| D8.45 A2                |   | 45:FIKDYP-GFYELPL-LDA-SPATVGLTALCKVVYEKTLNLN---VS---EPL    | 87 |
| zebrafish DCA (13)      |   | 45:FIKDYP-GFYELPL-LDA-SPATVGLTALCKVVYEKTLNLN---VS---EPL    | 87 |
| D8.46 A                 |   | 45:FA-----GQAVLP---PI-YVDAKRAEFNCKAYLAVLREVY---ASS-PEVL    | 83 |
| D18 A                   | X | 45:FA-----DLAVFQ---PL-YVDAKRA-FNGKAFLAVLREVY---ASS-PEVL    | 82 |
| salmon DDA              |   | 45:W-----GNYVDC---PI-CVRVAESRRA--DLNNDIKLFN---LET-PEAK     | 80 |
| spotted gar 501 A2      |   | 46:FA-----DSFGVD---PGW-VQGAIANRQICINNLEVAIKAE---NNP-PENT   | 85 |
| salmon DEA              |   | 47:FA-----QQWTPD---PGL-PHEVYVSLGTCQYNIPRCIVGE---KSP-PEAI   | 86 |
| seabream DEA (14)       |   | 30:FA-----KQWTPD---PRL-AEDAYVDLGTCHYNIPIAMKRD---NNT-PEAI   | 69 |
| spotted gar 615 A       |   | 46:FA-----EKWHVG---PEW-PPFAQQEVEVTCRLYL---AAKGE---GFP-EEKL | 83 |
| sturgeon (17)           |   | 46:FA-----KYWSPP---EGA-PARAETDRQTCINNVAVAAKCH---KYP-PERQ   | 85 |
| spotted gar 501 A1      |   | 46:F-----EKWAWN---DSSL-IQGALANLGICENHLKGVMAI---PDE-PAVK    | 85 |
| little skate (18)       |   | 46:FQ-----HITIE---GG-EAGITADIAFAKQNFNVKKNLS---HGS-PEPK     | 83 |
| nurse shark (19)        |   | 46:FA-----HLYMQ---GG-EAGISANIAIVKNNLKVVMNLS---GGT-PEPK     | 83 |
| coelacanth (20)         |   | 46:F-----KGHKID---SL-VEWTRQNIPICEHNLDDLKRT---NGL-LGKT      | 83 |
| Xenopus DAA (21)        |   | 46:L-----EKYTS---YD-PQGGIQLNINVAKYNLDGYKKS---NST-AATS      | 82 |
| chicken BLA (22)        |   | 50:F-----GRFAS---FE-AQGALQNMVAVGKQNLVMIKNS---NRS-QQDF      | 86 |
| human DQA (23)          |   | 47:F-----SKFGG---FD-PQGALRNMAVAKHNLNIMIKRY---NST-AATN      | 83 |
| human DRA (24)          |   | 46:F-----GRFAS---FE-AQGALANIAVDKANLEIMTKRS---NYT-PITN      | 82 |
| mouse DOA (25)          |   | 47:F-----GDFAH---SD-FQSGLMSISMIKAHLDILVERS---NRT-RAVS      | 83 |
| human DOA (26)          |   | 47:F-----GDFAR---FD-PQGGLAGIAAIKAHLDILVERS---NRS-RAIN      | 83 |
| Xenopus DMA (27)        |   | 46:L-----KKWANQDLFSN-SSDLAFDIQLCTEAMQNFTQAVV---NIT-PETK    | 87 |
| anole lizard DMA (28)   |   | 46:L-----QPEEGN---RTS-LDQVQLLGVICQDILQFLTNISE---AYM-PEAK   | 85 |
| chicken DMA (29)        |   | 46:G-----PSWPAD---IEQ-PHELLHDAALCRELLDLLTRITATGPNPM-PEAK   | 87 |
| human DMA (30)          |   | 46:F-----ADWAQE---QGD-APAILFDKEFCWEWMIQQIGPKLD--GKI-PVSR   | 85 |

## Text S4B: Beta 1 domain sequence alignment

|                      | NxS/T                                                | NxS/T                                |    |
|----------------------|------------------------------------------------------|--------------------------------------|----|
| salmon DAB (31) high | 1: DGYFEQVVRQCRY--SSKDLQGI                           | EFIDISYVFNKAEYIRFNSTVGKFGVGY-----TEL | 50 |
| trout DAB (32)       | 1: DGYASDVVTRCLY--SSIDMHGAEFIQSYTFNKVEHLRFN          | STVGGEFVGY-----TEL                   | 50 |
| Arctic char DAB (33) | 1: DGYFLQMVRQCQY--SSKDLHGIESIDSYVFNQVENIRFN          | STVGKYG VGY-----TEV                  | 50 |
| D8.35 B2             | 1: NVYYMYRVSRCIF--SSSNISAMVYFDRTYFNKNLFIQFNSNLGRFEGF | -----NEY                             | 50 |
| D8.35 B3 high        | 1: NVYYTYRWCRCIY--SSPDLSDMVYIDSKYFNKYLFAQFN          | STLGRYVGF-----SEY                    | 50 |
| D8.37 B1             | 1: NVYYRYTWIQCIS--SSKNLSDMVFIESLYFNKYLFTQFNSNIGKYVGF | -----SEY                             | 50 |
| D8.37 B3 high        | 1: DGYDYIKQQCFY--STSDYS DMVYLASYSFNKVVDTQFNSS        | VGKFGVGY-----TEQ                     | 50 |
| D4 B                 | 1: DGYFSTWSQCIY--SYPDLSDMVFILSFNFNKWMFLQFN           | STVGIFVGY-----TEQ                    | 50 |
| zebrafish DAB1 (34)  | 1: DGYQYTMLECIY--STSDYS DMVLLSGS FNKVVVDVQYFN        | STVGKYG VGY-----TEQ                  | 50 |
| zebrafish DAB2 (35)  | 1: DGYDYTKYECIY--STSDYS DMVFLQSYSFNKIVDVKCN          | SQEVKCVGY-----TEQ                    | 50 |
| zebrafish DAB3 (36)  | 1: -----Y--SSSDYS DMVLLISYS FNKVVVDTQFNSS            | VGKFGVGY-----TEQ                     | 38 |
| zebrafish DAB4 (37)  | 1: DGYDYIKQQCFY--STSDYS DMVYLASYSFNKVVDTQFNSS        | VGKFGVGY-----TEQ                     | 50 |
| zebrafish DEB (39)   | 1: DGYHYSRLTKCIF--QLQDLDIGVHDNYIFNKDVYIRFN           | STLGYFVGY-----TEH                    | 50 |
| zebrafish DFB (40)   | 1: DGYSTWSQCIY--SYPDFRDMEFIVGYFNKWMDIQFN             | STVGKYG VGY-----TEQ                  | 50 |
| carp DAB (41)        | 1: DGYEYTMYECVY--STSDYS DMVYLVLSL FNQVVVDVQFNSS      | AVKCVGY-----TEE                      | 50 |
| G131 B1              | 1: DGFMEFVATECVF--NSTELKDI EYIQSYYYNKLEYTRF          | SSSVGKFGVGF-----TER                  | 50 |
| G131 B2 X            | 1: DGFLEFMTDECVF--NSTELKDI EYITSYYYNKLELTRF          | -----                                | 37 |
| G131 B3              | 1: DGFMEFRTDECVF--NSTELKDI EFIRSSYYNKKEDTRF          | SSSVGKFGVGF-----TEQ                  | 50 |
| GIII B               | 1: DGFLEFMTDECVF--NSTELKDI EYIRSSYYNKKLELTRF         | SSSVGKYG VGF-----TEY                 | 50 |
| GVII B               | 1: GGFMEFVKDQCVF--NSTDLKGI EFIRSTYFNKLQYTKF          | SSSVGKFGVGF-----TEQ                  | 50 |
| stickleback DAB (42) | 1: DGFMMFVTDECVF--NSTELKDI EFIRSSYFNKKEDTRF          | SSSVGKFGVGF-----TEQ                  | 50 |
| stickleback DBB (43) | 1: DGFMEFRTFRCVF--NSTELKDI EYIDSYFFNKLELTRF          | SSSVGKFGVGF-----TEY                  | 50 |
| M3 B                 | 1: DGFHYILNRCFLF--NSSDLKDI ENIYSYYNKEEFLRF           | SSSSGKFGVGY-----TEI                  | 50 |
| M615 B               | 1: DGFLEYDMHRCLF--NSSDMKDI EYIYSKHYNKEEVIRF          | SSSLGKYVGY-----TKF                   | 50 |
| M873 B high          | 1: DAFLRYDVDRCVF--NSTDLKDI EYIYSMYYNKKEFTRF          | SSSLGKYVGY-----TEY                   | 50 |
| medaka DAB (44)      | 1: DAFMEYAVNRCEF--NSSDLTDI EYIYSMYYNRKEYARF          | SSSLGKYVGY-----TEF                   | 50 |
| F7533 B              | 1: GGFQSYVVDSCDF--NSTDLKDI EYTRSLYNRVMYARF           | SSRVGKFE GY-----TKY                  | 50 |
| F7721 B X            | 1: GGFQSYRVDRCDF--NSTDLKDI EYSRSHYYNKLMYVRF          | SSSVGKFE GY-----TKD                  | 50 |
| F8524 B X            | 1: GGFQSYRVDRCDF--NSTDLKDI EYSRSHYYNKLMYVRF          | SSSVGKFE GY-----TKD                  | 50 |
| T19 B                | 1: GAFEHYGLRRCDF--TSAEPKDI EYSLSVYYNKLHMAF           | SSSVGKFGVGY-----DKY                  | 50 |
| T61 B X              | 1: GGFHEYVDLCDF--TSAELKDI EYSRSLYNNKHLARF            | SSSVGTFVGF-----TKY                   | 50 |
| O1 B                 | 1: DGFLEYIVDRCDF--NSTELENMEYIYSHYYNKMEYIRF           | SSNVGQYVGF-----TDF                   | 50 |
| O18 B1               | 1: GGFMHYSVDRCNF--NSSEPQDI EYIRSYFRKVEFTRF           | DSSVGKYVGY-----TEY                   | 50 |
| O18 B2               | 1: DGFMEYHVDRCNF--NSTDLKDI EYIYSCYYNKEYARF           | SSSVGKFGVGF-----TKH                  | 50 |
| O18 B3 X             | 1: DGFMYVVSRCDF--NSTELKDI KYIRSYYYNKEYVTRF           | DSDVRKFGVGF-----TGF                  | 50 |
| O22 B1               | 1: DGYEYTTSSRCLF--NSTELRDI EYIRSYYYNKEYVRF           | SSSVGKFGVGY-----TEY                  | 50 |
| O22 B2 X             | 1: -GYEYTTSSRCLF--NSTELRDI EYIRSYYYNRIEYVRF          | SSSVGMFVGY-----TEY                   | 49 |
| O31 B1               | 1: DGFLEYMVERCKF--NSTELKDI MEYIYSHYYNKEYIRF          | SSSVGKYVGV-----TEF                   | 50 |
| O31 B2               | 1: --FLEYIVDRCEF--NSTELKDI MEYIYSHYYNKEYIRF          | SSSVQYVGF-----TEY                    | 48 |
| O31 B3               | 1: DGFLEYIVDRCEF--NSTELKDI MEYIYSHYYNKEYIRF          | SSSVGKYVGV-----TDF                   | 50 |
| O79 B1 X             | 1: DGYELYNDRCLF--NSTELQDVEFIRSCYYNKEYVRF             | SSSDVGKFGVGY-----TDF                 | 41 |
| O79 B2               | 1: DGYEYSSSTRCLF--NSTELKDI EFITSYYYNKEYVRF           | SSSDVGKFGVGY-----TEY                 | 41 |
| O80 B                | 1: DGFMTYRLSRCDF--NSTELKDI QFTDSYYNMI EIRF           | SSNVGKFGVGF-----TDF                  | 50 |
| O745 B               | 1: DGFMYVLSRCDF--NSTELKDI MKYIRSYYYNKEYVTRF          | DSDVRKFGVGY-----TEY                  | 50 |
| O845 B               | 1: DGYEYTTSSRCLF--NSTELRDI EYIRSYYYNKEYVRF           | SSSVGKFGVGY-----TEY                  | 50 |
| OA35 B X             | 1: -GYEYTTSSRCLF--NSTELRDI EYIRSYYYNRIEYVRF          | SSSLGMFVGY-----TEY                   | 49 |
| OA78 B X             | 1: DGYEYTTSSRCLF--NSSELRDI EYVRSYYYNRIEYVRF          | SSSVGMFVGY-----TEY                   | 50 |
| salmon DBB           | 1: DEDFAHDDAWCRF--SSRD LHNMEYILEHFNKILVAQYN          | STTERWTGY-----TAW                    | 50 |
| GXVII B              | 1: HGYFMYADFNCNM--QTARPQQVEYLVDWYFNKEFTMQYN          | STVGKWTGF-----TAA                    | 50 |
| M5 B1                | 1: HGYFMFSDFFCYI--PSRNPKEVQYLIDWYFNMELTMQYN          | NSSVGGWTGF-----TPA                   | 50 |
| M5 B2                | 1: HGYFMFSDFLCYL--PSRNPKEVQYLIDWYFNMELTMQYN          | NSSVGGWTGF-----TPA                   | 23 |
| O97 B1 X             | 1: DGYFMFADFCCVM--HSRDPKTV EYLIDWYFNKEFTMQYN         | STVGKWTGL-----TPA                    | 50 |
| O97 B2 X             | 1: DGYFMFADFCAV--HSRDREVEYLIDWYFNKEFTMQYN            | STVGKWTGL-----TPA                    | 50 |
| salmon DCB           | 1: DGYFGHFEMRCWF--SSEDPRDI EYLLQVYGNKLLGQYN          | STTEKCTVY-----TQW                    | 50 |
| M16 B                | 1: NAFYGHGTLKQCF--TSS--HDLVYLEQVYFNKRLMVQYN          | STLGKYE GY-----TKK                   | 48 |
| O29 B1               | 1: DAYFGYGVVRCFLF--TSKD--DVVYLAQVYLNKMLLQQYN         | NSSLGKYVGY-----TEK                   | 48 |
| O29 B2 X             | 1: -----LIRCLF--TSKD--DVVYLAQIYFNKVLLVQYN            | STLGKYVGY-----TEK                    | 41 |
| O29 B3 X             | 1: -----EQFYFNKVLECCQYN                              | NSSVGKVVGY-----TKN                   | 26 |
| swordtail DXB (47)   | 1: GAFYLSVLERCQS--SLTDGHDVAVLLDQVYFNKILEGQYN         | STAGKVI GY-----TEK                   | 50 |
| O9 B                 | 1: DEKYFHILKTCQFI--EKSSQSDVHYQVQYWYNGLLQAFYN         | NSSTEKVVGF-----THY                   | 51 |

057 B 1: DEDYFQSRACCTF--KGFPHFEDMEYTRIIISLNKIAVLEYNHTRGSWIGF-----TPY 50  
 D18 B 1: HGHYGFVQFTCHM--LGS-LQNVEVTYSIYFDTELLRRFNSTENKAVAY-----TEY 49  
 zebrafish DBB (48) 1: HGHYGFVQFTCHM--LGS-LQNVEVTYSIYFDTELLRRFNSTENKAVAY-----TEY 49  
 D8.45 B1 1: HAYTYAQIQCHV--SDS-LQKIEFIFSVTYNMIELVRYNSTEDTFFGY-----TAI 49  
 D8.45 B2 1: CGNYGYLQSQCRV--LSS-TKKVELIFSFIFNKIEYIRYNSTDQKIVGY-----TEF 49  
 zebrafish DCB (49) 1: CGNYGYLQSQCRV--LSS-TKKVELIFSFIFNKIEYIRYNSTDQKIVGY-----TEF 49  
 salmon DEB 1: GGYQFQGIVDCEY--DDT-IDNMIYFVKNIENQKLTITYDSRVQKYVGF-----GEF 49  
 fathead minnow DEB (50) 1: DVYVFQNIIVECEY--SKVDLSDMVIYIKLVFNQKLLCSYDSRLGKYVGY-----DEF 50  
 spotted gar 501 B1 1: DDFVYFRRSECHF--SASDLRDLVYVRSMTFNGKERVRFNSTVGGKYVGF-----DTW 50  
 spotted gar 615 B 1: DGNMYQFVHDCY--NDH-LEDFLYTRRDIFNKIEILRYDSNIQTFFVGY-----TPL 49  
 paddlefish DAB01 (51) 1: EGYLMQTLVDCEY--SDSSMTDMVYSWNYVFNKQEVVHYDSKIKKYVGN-----TAC 50  
 paddlefish DAB02 (52) 1: EGYLMQTLVDCEY--SDSSMTDMVLSWNYVFNKQEVVHYDSKIKKYVGN-----TAC 50  
 paddlefish DAB03 (53) 1: EGYLMEEMADCEY--SDSSMTDMVYSRSYVFNKQEFIHYSKIKKYVGN-----TAC 50  
 ray (54) 1: GAHSLTKIGGCAF--NSSAPGEWTFYFSKGIYDGEVIWYDFDQRKFVAV-----KGW 50  
 nurse shark(55) 1: GAHSEISLHRCVF--NST--GDWVFLKQQVYDQELIAYYDYNQRKFIAV-----KAW 48  
 coelacanth (56) 1: ISNVEQYQWECHYT--NGT--QDIDFIHRVIYNGQEESYFDSRIGKFTGV-----TEW 49  
 Xenopus (57) 1: EDYVYQYKAQCYFR--NGT--DNVRLLRHYYNLEETDYFDSVGLFIAK-----TEL 49  
 chicken BLB (58) 1: AFFFCGAISECHYL--NGT--ERVRYLQRYIYNRQQTFHFSDVGGKFAVD-----SPL 49  
 human DQB (59) 1: EDFVYQFKGLCYFT--NGT--ERVRGVTRHIYNRREYVRFSDSVGVYRAV-----TPQ 49  
 human DRB (60) 1: PRFLEQVKGHECHF--NGT--ERVRFDRYFYHQEYVRFSDSVGVYRAV-----TEL 49  
 mouse DOB (61) 1: ENFVIQAKADCYFT--NGT--EKVHLLVRFIFNLEEYLHFSDSLGMFVAL-----TEL 49  
 human DOB (62) 1: EDFVIQAKADCYFT--NGT--EKVQFVVRVIFNLEEYVRFSDSVGMFVAL-----TKL 49  
 Xenopus DMB (63) 1: SGFVVQEMIDCSFENNET---ATFHYSLTFNRMTVVAYDATRQKFTYCDPYPCIKQIYMV 57  
 anole lizard DMB (64) 1: GAFVLHLETD CFLSPSGR---ALWANWTMAFNQLPLVCYDNKGGHFLPCGLGEVNPW--FPV 57  
 chicken DMB (65) 1: CAFVVMHASSCP LLANGS---LGSFDLTMAFNKNPLLCDP DVHRFYPCDWGLL----HTV 54  
 human DMB (66) 1: GGFVAHVESTCLLDAGT---PKDFTYICISFNKDLLTCWDEENKMAPCEFGVL----NSL 54

## 81HN82

salmon DAB (31) high 51: GVKNAEAWNSD-----AAVLAVERGELE RYCKHNADLHYST--ILDKT 91  
 trout DAB (32) 51: GLKNAKRLNRG-----QEVVQMRGELERLCEPNADVHYRA--ILDKT 90  
 Arctic char DAB (33) 51: GLKNAETWNGK-----SELARELQLERFCKHNADIHSA--VLDKT 90  
 D8.35 B2 51: GLKLAEFWNNG-----TFVDQEKDVVEFFCKYNSQIYENS--ILDKA 90  
 D8.35 B3 high 51: GIRNAEYWNNG-----TFVEQERNEVERFCKHNAQIRDSA--VISKA 90  
 D8.37 B1 51: GIRNAEFRNND-----TNLLLKKAAVNKVCKNNAINHDKF--IRNKA 91  
 D8.37 B3 high 51: GLIFAENFNKD-----QAYLHQLKAQVDTFCRHNAQIWD SA--VRDKA 91  
 D4 B 51: GVKFAENFNKN-----EAYLQQLRAEVDIFCRHNAE IYESA--VFDKA 91  
 zebrafish DAB1 (34) 51: GVI FARNFNKN-----QAYLQQRKAEVESFCRHNAQISDSA--VRDKA 91  
 zebrafish DAB2 (35) 51: GVKFAENFNKD-----QAILQQLKAQVDTFCRHNAE IYESA--VRDKA 91  
 zebrafish DAB3 (36) 39: GVKSAENFNKN-----QAYLQQLKAGVDTFCRHNAQISDSA--VRDKA 79  
 zebrafish DAB4 (37) 51: GLIFAENFNKD-----QAYLHQLKAQVDTFCRHNAQIWD SA--VRDKA 91  
 zebrafish DEB (39) 51: GVYNAQLWKQR-----YQLLEQERAHEDRFCKYNAE IDYNN--ILGKT 91  
 zebrafish DFB (40) 51: GVKFAENFNKD-----QALLQMKSEVDSICRHNAE IYESA--VFD-- 89  
 carp DAB (41) 51: GVKYAEFNFNKD-----PSVLQDLKTSVDTYCRSNAQ LADSS--VRDKA 91  
 G131 B1 51: GVKNAAAWNNN-----PSYLSRAKAQKEVYCLNHVPVY YNN--MLTKS 91  
 G131 B2 X 37: ----- 37  
 G131 B3 51: GVKYAAWNNKD-----ASYLSAMRAQKEVYCLN NVQIKYDN--ALTKS 91  
 GIII B 51: GVRNAANWNNKD-----ASELIAMRAQKEVYCLNSIQIKYNN--VLT KS 91  
 GVII B 51: GMKNAAAANNND-----NMYMASIRAAKETICQPN IQRMYDN--ILT KS 91  
 stickleback DAB (42) 51: GVKIAANWNNKD-----ASFLSAMKAQKEVYCLNHVPVY YTA--ALTKS 91  
 stickleback DBB (43) 51: GVRNAEYWNNN-----PSYLSAMKAQKEVYCLNHVPVY YSN--ALTKS 91  
 M3 B 51: GVKTAELANND-----PEKMSRRRAEKETFCKPN IDNDYST--ILT KS 91  
 M615 B 51: GVMAAGYWNNKD-----LEGLRERRADKERLCKT NIDLDYLN--ILT KS 91  
 M873 B high 51: GVKTAERANKD-----TSELSARKAQKET YCKHNIDNWKY--MLSKS 91  
 medaka DAB (44) 51: GVKNAERFNKD-----TSELSVRRAQKET YCKHNIDIDYQT--ALS KS 91  
 F7533 B 51: GLFQADYWNNQ-----SSILEGLRETKE S ICQPN I KIDYSN--ILT KS 91  
 F7721 B X 51: GLIQADYWNNI-----SSYLEQMRDEKERYCEPN I KVWYSN--ILT KS 91  
 F8524 B X 51: GLIQADYWNNI-----SSYLEQMRDEKERYCEPN I KVWYSN--ILT KS 91  
 T19 B 51: GQYQADYWNNQ-----SSFLEAMRSSKQRLCQH NIPLWYSH--ILT KS 91  
 T61 B X 51: GLHQADYWNNQ-----SSYLDRLKEEKQRYCHRN IONWYSH--ILT KS 91  
 O1 B 51: GVRLEAVWNNND-----TADLNLMLRKIATYCHN I DINDRA--ILT KS 91  
 O18 B1 51: GVKNAEEWNNKD-----KGNLAAMNAQKEVY CQKKIDNRYNA--ILPKS 91  
 O18 B2 51: GVYNADKWNND-----PAELNNRRAQKERYCHN NIGVDYQV--ALTKS 91  
 O18 B3 X 51: GVKQAKHFNSQ-----PGRLATLKAEKERYCQH NIGI WYSN--VLPKS 91



|                         |   |                                                          |    |
|-------------------------|---|----------------------------------------------------------|----|
| O22 B1                  |   | 51:GVREADQWNKDQGGQSWTRKGGQLAAMRAQKETCYCKPKIDFWYQS--VLTKA | 99 |
| O22 B2                  | X | 50:GVKEAEYFNND-----PGQLAAMRAQKEYCTPNIDLWYRS--VLTKS       | 90 |
| O31 B1                  |   | 51:GENLAKHWNNND-----TEELNSTRSKIIVTYCLNNIDLHDRA--IIAKS    | 91 |
| O31 B2                  |   | 49:GVMLAEILNNN-----TALLNSSRQMITCYCYHNIIDVHDQA--IIAKS     | 89 |
| O31 B3                  |   | 51:GVNLAKRWNNN-----TALLNSTRSKIATYCLSNIGIHDRA--IIAKS      | 91 |
| O79 B1                  | X | 42:GMKNAEMWNKD-----QGYLAAMRAQKETCYCKHNIIDLWYTN--VLSKS    | 82 |
| O79 B2                  |   | 42:GVKNAEYWNKN-----QALLAQMRAQKETCYCPNIGIWIYAD--VLSKS     | 82 |
| O80 B                   |   | 51:GVKTAETWNNI-----PARLASMRAQKGTVCYCKSNIDVRYHK--LTSKS    | 91 |
| O745 B                  |   | 51:GVKKAETWNNND-----QAHMAAFRVEKERYCYTNIIGIWIYRN--ILSKS   | 91 |
| O845 B                  |   | 51:GVREADQWNKDQGGQSWTRKGGQLAAMRAQKETCYCKPKIDFWYQS--VLTKA | 99 |
| OA35 B                  | X | 50:GVKEADQWNND-----PGQLAAMRAQKEYCTPNIDLWYRS--VLTK-       | 89 |
| OA78 B                  | X | 51:GVREADQWNKD-----QGQLAVMRAQKEYCTPNIDLWYRS--VLTKY       | 91 |
| salmon DBB              |   | 51:GVISAEKWNED-----PDEIPRRRTDMGVLCCKPYANRIYNA--TEFMF     | 91 |
| GXVII B                 |   | 51:GLVSAAVFNGN-----HFDVLRKEERRLICVDNVGHALNA--TEDNM       | 91 |
| M5 B1                   |   | 51:GLITAAKFNAD-----KYDVVQRILEREIVCQRSVEMVYNG--TEEAK      | 91 |
| M5 B2                   |   | 24:GLITAAKFNAD-----KHDVVQRILEREIVCQRSVEIYYET--TETAK      | 64 |
| O97 B1                  | X | 51:GLITASQFNED-----KFDVDQRKAEKQLTCVNNVDVAVFNG--VQENI     | 91 |
| O97 B2                  | X | 51:GLITASRFNED-----SADILQRKVEKQLICVNNVDVAVFNI--TVENM     | 91 |
| salmon DCB              |   | 51:MKNFTEACKG-----PAFLADRREEMKKYCSSNVPVYGY--LLDKA        | 91 |
| M16 B                   |   | 49:AKDLADGFSKS-----KPFLEQAVKNREK-CRTHMDLVFE--IQSHP       | 87 |
| O29 B1                  |   | 49:TKEIADNLNKN-----KGFLEHEKKNKEKCRNTNIPLVLD--LISRP       | 87 |
| O29 B2                  | X | 42:LKEVADELNKN-----ERFLEQEKKNEQECRTNIPLVFN--VLSRP        | 80 |
| O29 B3                  | X | 27:GIEFADKLNKD-----KDFMKHEVVKSNLCKRNVQMFYD--GL---        | 62 |
| swordtail DXB (47)      |   | 51:AEAVAILNNN-----PEFITHEIWKTNLCKRNTPLAQK----LLTP        | 88 |
| O9 B                    |   | 52:GKVFADENVKS-----PDYLVKVRNNDLNYFCKVLGAVLYKD--IQVKA     | 92 |
| O57 B                   |   | 51:TIEIAKFWNLN-----PFGTSEAKA----LCSTNLGYIQI--LSNVT       | 86 |
| D18 B                   |   | 50:AMKWANDLNKQ-----PKWLHEQVEKNIADCKLFGETYFP--LVAKT       | 89 |
| zebrafish DBB (48)      |   | 50:AMKWANDLNKQ-----PKWLHEQVEKNIADCKLFGETYFP--LVAKT       | 89 |
| D8.45 B1                |   | 50:GQKFAEEYNKD-----KVLLAQHDFVNLQCRELGDVILPN--AVWLA       | 89 |
| D8.45 B2                |   | 50:GEKFVENYKNN-----TFVLVLAEFGLDNCKKIAKALISDGMLNHVT       | 91 |
| zebrafish DCB (49)      |   | 50:GEKFVENYKNN-----TFVLVLAEFGLIYNCKKIAKALISDGMLNHVT      | 91 |
| salmon DEB              |   | 50:GIRNADRYNSQ-----AWKMAIRKAEVETICRYSAIFFKLS--TLERI      | 90 |
| fathead minnow DEB (50) |   | 51:GIRNADHYNSQ-----GWKMKQRKEELETLCRANARLYVNS--T-RRK      | 90 |
| spotted gar 501 B1      |   | 51:GEKQANYWNGQ-----KDYIARLSADKDRFCKYNVQLMASG--MQDRK      | 91 |
| spotted gar 615 B       |   | 50:GIKYAERFNQD-----KEYLAGLKDDLDNYCKHNAGVYKST--MTDRK      | 90 |
| paddlefish DAB01 (51)   |   | 51:GVKNAEYWNKD-----TAQLAGLLGDVDRYCKHNAELYMLF--TTDRK      | 91 |
| paddlefish DAB02 (52)   |   | 51:GVKNAEYWNKN-----TAQLAGLLGDVDRYCKHNAELYMLF--TTDRK      | 91 |
| paddlefish DAB03 (53)   |   | 51:GVKNAEEWNKD-----TARLAGLLGDVDRYCKRHAELYMLF--TTDRK      | 91 |
| ray (54)                |   | 51:MKGNDRWNK-----EAAESTYQRGLSMCENNIPLYGRE--VLPRR         | 89 |
| nurse shark (55)        |   | 49:MKSNVDRWNR-----EGAEQYESGKAYCEHNIPLVYES--ALARQ         | 87 |
| coelacanth (56)         |   | 50:GKKDADYWNKD-----KENLAQWRIQEDRWCRNNYNWQGW--AVGKQ       | 90 |
| Xenopus DAB (57)        |   | 50:GKPSADYWNSQ-----KETLEQKRAAVDTVCRHNYPDFKPF--TIDRK      | 90 |
| Chicken BLB (58)        |   | 50:GEPQAEYWNSN-----AELLENRMNEVDRFCRHNYGGVESF--TVQRS      | 90 |
| human DQB (59)          |   | 50:GRPVAEYWNSQ-----KEVLEGARASVDRVCRHNYEVAYRG--ILQRR      | 90 |
| human DRB (60)          |   | 50:GRPDAEYWNSQ-----KDLLEQRRAAVDTYCRHNYGVVESF--TVQRR      | 90 |
| mouse DOB (61)          |   | 50:GEPDADQWNKR-----LDLLETSSRAAVNMVCRQKYRLGAPF--TVERN     | 90 |
| human DOB (62)          |   | 50:GQPDAEQWNSR-----LDLLEERSRQAVDGVCRHNYRLGAPF--TVGRK     | 90 |
| Xenopus DMB (63)        |   | 58:AAGIAKKLNKK-----PGIVTRMQQEKSKCQAQVKEFWEN--TMERR       | 97 |
| anole DMA (64)          |   | 58:ASSISQWLDTN-----APPQGPBAR-QACQNQTQPIWKR--TAERR        | 95 |
| chicken DMB (65)        |   | 55:ATLLAAAILNDD-----TTWVQRAEARRACTELAAQFWTH--TALRR       | 94 |
| human DMB (66)          |   | 55:ANVLSQHLNQK-----DTLMQRLRNGLQNCATHTQPFWGS--LTNRT       | 94 |



tilapia DAA (12) 1:-----KNGHPVS-TGVSLSRYPNPKD 20  
 O9 A 1:KAPA-VVIYPMDEAETGKNNTIYCHIRHFYPPSNVTVTRNGIRVT-EGVNLSNPYQTD 58  
 O33 A 1:EPPE-FIIYPRDEVITGEDNTLICFINHFFPPSINIKWTKNDVEVT-VEDPFIKTLSNPD 58  
 O57 A 1:APPE-IIIIYPRDEVMKEEDNSLILIKKFFPPSIKIKWTKNDIEVK-VEDPFIKCLPNPD 58  
 D8.45 A1 1:EPPW-TTVYSRNDVKLNKNTLICHVTFGFFPPVVRVLWTKNNVNVTV-DGSTISRYPNPKD 58  
 D8.45 A2 1:EPPW-VLLYPRNDVKLNKNTLICHVTFGFFPPVVRVLWTKNNVNVTV-DGSTISRYPDND 58  
 zebrafish DCA (13) 1:EPPW-VLLYPRNDVKLNKNTLICHVTFGFFPPVVRVLWTKNNVNVTV-DGSTISRYPDND 58  
 D8.46 A 1:EPPW-SSIYPKSDPQLNLKNTLICHVTFGFFPPVVRVLWTKNNVNVTV-DGSTISRYPNPKD 58  
 D18 A X 1:EPPL-SSIYPKSDPQLNVKNTLICQVTGFFPPVVRVLWTKNNVNVTV-DGSTISRYPNPKD 58  
 salmon DDA 1:VPPE-IKLYAKDEVKLGINNSLVCVFNFFPPVQVKWTKNDENVP-KGVKVGQYATNSD 58  
 spotted gar 501 A2 1:DAPV-NTIYPRDEVELGKPNLTLICLANNFFPPVVKVRWTKNDVDVS-EQATLSRYPNSD 58  
 salmon DEA 1:EVPT-SHIYSQREVELGVPNTLICRVSDFHPTVDVTVTRNEQPVAERTIIQTQYYSNED 59  
 seabream DEA (14) 1:ASPT-SLIYSKQEMELGVPNTLICFVSDFHPPVQITWTRNGQPVDQSDVSQTQYYSNSD 59  
 carp DEA (15) 1:-----FHPPPVNISWMRNGEPVSEQDVSETQYYSNPD 32  
 loach DEA (16) 1:-----FHPPPVNISWTRNGEAVSELDVYETQYYSNPD 32  
 spotted gar 501 A3 X 1:DAPT-AMVYPRDSVELGKPNLTLICSVTFHPMGIGVTVTHNDRPVT-EGVTQTTPLSGRD 58  
 spotted gar 615 A 1:DPPI-SRLYSENEVELGVPNALICFITDFHPAPVKVSWTRNTEPVT-QGFNVTQYYSNKD 58  
 sturgeon (17) 1:VSPR-VTLYPEKDLDELGKPNLTLICFITDFHPAAIKVWTKNTLPVT-EGVSLTQYYSNKD 58  
 spotted gar 501 A1 1:VPPK-PAVFPEEPVELGWPNTLICALNDFTPPTAQLRLWLKNGQPVT-SDVSSTDIYIPLSS 58  
 little skate (18) 1:VPPQ-TAMYPEDPVWGESNTLICLADGFYPPRINMKWKRNNPVT-EGIDTTEYVVKRD 58  
 nurse shark (19) 1:VPPE-VSVYSEDLVWEGQLNTLICFADGFYPPHITMKWRRNNEPMT-BGDNITEFYIKDD 58  
 coelacanth (20) 1:VPPE-VTMYPENQVEFGKANILICFMDNFYPPVLFNTWYKNGNQVS-EGFYNTDFYSKVN 58  
 Xenopus DAA (21) 1:IPPL-ITLYSAKPVVQGEPNILICCVNNIFPPVMNTTFKNGQKIS-DGFSETSFLPAKD 58  
 chicken BLA (22) 1:VTPE-LALFPAEAVSLEEPNVLICADKFWPPVATMEWRRNGAVVS-EGVYDSVYGRPD 58  
 human DQA (23) 1:EVPE-VTVFSKSPVTLGQPNLTLICLVDNIFPPVNVITWLSNGQSVT-EGVSETSFLSKSD 58  
 human DRA (24) 1:VPPE-VTVLTNSPVELREPVLICFIDKFTPPVVNVTVLWRNGKPVTV-TGVSETVFLPRED 58  
 mouse DOA (25) 1:VPPR-VTVLPKTRVELGKPNVLCIVDDIFPPVINVTWLRNSQPIT-KGVAQTSFYSQPN 58  
 human DOA (26) 1:VPPR-VTVLPKSRVELGQPNILICIVDNIFPPVINITWLRNGQTVT-EGVAQTSFYSQPD 58  
 Xenopus DMA (27) 1:GILD-IKVFTLHPLTIGKPNLTVCFISNIIIPDLNITWRKNGILLT-EGISYTGYPALSND 58  
 anole lizard DMA (28) 1:GAPQ-IDVFTLRPLEMGKPNLTVCAASNVPPTISLHWELDGGQPVSSRVSTPSQVSPVQG 59  
 chicken DMA (29) 1:GIPV-ADVFLQQPLQLGYPNTLICMVGNIFFPAITISWQRDGIPTV-DGVTHLTYTPTED 58  
 human DMA (30) 1:GFPI-AEVFTLKLPLEFGKPNLTVCFVSNLFFPMLTVNWQHHSVPV--EGFGPTFVSAVDG 57

salmon DAA (1) high 59:FTLNQFSSLPFTPEEGDIYGCTVEHKG-L-AEPLTRIW 94  
 trout DAA (2) 59:VTFNQFSSLSFTPEEGDIYGCTVEHKA-L-TEPLTRIW 94  
 Arctic char DAA (3) 59:FTLNQFSSLTFTPEEEDIYGCTVEHKGHI-HEPLTRIW 95  
 D8.35 A1 59:GTFNIFSTFRFTPAEGDIYSCRVIHEA-LGQPQAKIY 95  
 D8.35 A2 high 59:GTFNIFSTLKFTPAEGDIYSCMVKHRA-IKDQPQTKTW 95  
 D8.37 A1 59:GTFNIFSTLKFTPAEGDIYSCVNHRT-LQGQPQTRIW 95  
 D8.37 A2 59:GSFNIFSTLKFTPAEGDIYSCVNHRA-LQGQAQTKTW 95  
 D8.37 A3 high 59:GTFNMFSAKFTPAEGDIYSCVVKHRS-IQGQNTTKTW 95  
 D8.37 A4 high 59:GTFNMFSAKFTPAEGDIYSCVVKHRS-IQGQPNTTKTW 95  
 D4 A 59:QTFHMFSSLKIRPAAGDIYGCTVNHAA-LQEQPQTKLW 95  
 zebrafish (4) 59:GTFNMFSAKFTPAEGDIYSCVNHRS-IQGQPNTTKTW 95  
 zebrafish (5) 59:GTYNIFSTLRFTPEGDIYSCSVNHKT-L-EQPQTKAW 94  
 carp DXA (6) 59:GTFNIFSSLKFTPAEGDIYSCVYHKA-LESRFITKTW 95  
 Atlantic herring DAA (7) 60:LSFNQFFTLNFTPEEGDMYCTVEHQA-L-EGPMTREF 95  
 G129 A X 53:RTFNQFSTLEFTPKLGDYSSRVEHLA-L-DHPLVKFY 88  
 G131 A1 high 60:GTFNQFSTLEFTPKLGDYSCMVEHLA-L-DHPLVKFY 95  
 G131 A2 60:GTFNQFSTLKFTPKLGDYSCMVEHLA-L-DHPLVKFY 95  
 G131 A3 60:GTFNQFSTLEFTPKLGDYSCMVEHLA-L-DHPLVKCV 95  
 GVII A 60:GTFNQFSTLEFTPELGDYSCMVEHLA-L-DHPLVRFY 95  
 stickleback DAA (8) 60:GTFNQFSTLEFTPKLGDYSCMVEHLA-L-DHPLVKFY 95  
 stickleback DBA (9) 60:GTFNQFSTLEFTPKLGDYSCMVEHLA-L-DHPLVKFY 95  
 M3 A 58:GTLTQISRLQFVPPQLGDYSCSVVEHQA-L-PEVQTKIW 93  
 M615 A 58:GTFNQISRLQFVPPQLGDYSCSVVEHQA-L-PEVQTKIW 93  
 M873 A high 55:GTFNQISRLQFVPPQLGDYSCSVVEHQA-L-TEVQTKIW 80  
 F402 A 60:GTFNQISRLQFVPPQLGDYSCSVVEHQA-L-SGQDTRMW 95  
 F7533 A 60:GTFNQISRLQFVPPQLGDYSCSVVEHQA-L-SGLDTRMW 95  
 F7721 A 60:GTFNQISRLQFVPPQLGDYSCSVVEHQA-L-SGQDTRMW 95  
 T19 A 60:GTFNQISRLQFVPPQLGDYSCSVVEHQA-L-SEADTRMW 95  
 T55 A 60:GTFNQISRLQFVPPQLGDYSCSVVEHQA-L-SEADTRMW 95

|                         |   |                                            |    |
|-------------------------|---|--------------------------------------------|----|
| T61 A                   |   | 59:GTFQTQISRLDFVPQQGDIYSCRVQHPA-L-SEADARMW | 94 |
| O1 A                    |   | 60:GTFKQIARLQFIPQQGDIYSCVQHLA-L-KEPLTKIY   | 95 |
| O18 A1                  |   | 60:GTFQTQISRLQFTPQQGDIYSCVQHLA-L-TQPATKIY  | 95 |
| O18 A2                  |   | 60:GTFQTQISRLQFTPQLGDIYSCVQHLA-L-TQPLTKIY  | 95 |
| O18 A3                  |   | 60:GTFQTQISRLQFTPQQGDIYSCAVQHLA-L-TQPLTKIY | 95 |
| O22 A1                  |   | 60:GSFQTSKLDVFPKGGDVYACIVEHMA-L-TQPITKVY   | 95 |
| O31 A1                  | X | 55:GTFQTQIARLQFIPQQGDVYSCVQHLA-L-TKPLTKIY  | 90 |
| O31 A2                  | X | 59:GTFQTQIARLKFIH-----CTVEHLA-L-TDPLTKT-   | 87 |
| O31 A3                  |   | 60:GTFQTQIARLKFIIPQQGDVYSCVQHLA-L-TKPLTKIY | 95 |
| O31 A4                  |   | 60:GTFQTQIARLKFIIPQQGDVYSCVQHLA-L-TKPLIKIY | 95 |
| O39 A                   | X | 59:-----                                   | 59 |
| O42 A                   |   | 60:GPFQTQISRLQFTAQLGDIYSCVQHLA-L-TEPLTKIY  | 95 |
| O79 A1                  |   | 60:GSFKQTSRLQFIPKQGDVYSCVQHLA-L-IQPMTKFY   | 95 |
| O79 A2                  | X | 60:GSFKQTSRLDFIPKQGDVYSCVQHLA-L-IQPMTKFY   | 95 |
| O79 A3                  |   | 59:GSFKQTSRLNFIIPKQGDVYSCVQHLA-L-TQPMTKFY  | 94 |
| O79 A4                  | X | 60:GSFKQTSRLDLIPKKRDVYSCVQHLA-L-TQPTTKFD   | 95 |
| O745 A                  |   | 60:GTFQTQISRLQFTPQLGDIYSCAVQHLA-L-TQPLTKIY | 95 |
| O845 A                  |   | 60:GTFQTQTSKLDVFPKGGDVYACIVEHVA-L-TQPLTKVY | 95 |
| OA35 8                  | X | 47:GTFQTSKLDVFPKGGDVYVCIVEHVS-L-TAPLTKIY   | 82 |
| OA78 A                  | X | 59:GTFQTSKLDVFPKGGDVYVCIVEHVS-L-TAPLTKIY   | 94 |
| tilapia DAB (10)        |   | 60:GSFKQTSRLDFTPQLGDMYSCVQHLA-L-TEPLTKIY   | 95 |
| A.hansbaenschi DCA (11) |   | 60:GTFQTQIARLQFIPQQGDVYSCVQHLG-L-TKPLIKIY  | 95 |
| salmon DBA              |   | 59:GTFHQFSSLSFTPQKEDVYICAVAHTA-L-KEPKTREY  | 94 |
| GXVII A                 |   | 59:GTFHRISTLSTTPREGDVYSCVQHLA-L-RRPLASSW   | 94 |
| M5 A                    |   | 59:GTFRGISTLSFTPQKQDVYSCVQHLA-L-ERPRIITW   | 94 |
| O97 A                   |   | 59:GTFHMISTLLFTPQPGDHYICTVEHQA-L-KVPVSKSW  | 94 |
| salmon DCA              |   | 59:GTFHQFSSLSFTPQEGDVYGCIVKHTA-L-EDPKTRFW  | 94 |
| M16 A                   |   | 60:QTFHQFSTLSFTPSWTDVYSCVQHLA-L-ESPKTVLW   | 95 |
| O29 A1                  | X | 58:QIFHQFSTLTFSLSEGDYSCVQHLA-L-ETPQTRIW    | 82 |
| O29 A2                  | X | 59:QTFHQFSTLVFTPSEGDYSCVQHLA-L-ETPQTRIW    | 81 |
| O29 A3                  |   | 59:QTFHQFSTLSTLFTPSEGDYSCVQHLA-L-ETPQTRIW  | 94 |
| tilapia DAA (12)        |   | 21:QTFHQFSTLSTLFTPSEGDYSCVQHLA-L-ETPQTRIW  | 56 |
| O9 A                    |   | 59:GTFNQLASFSFPQSDVVECSVQHLA-L-SRPLITTW    | 94 |
| O33 A                   |   | 59:GTAYVLSYLNFPVPEKGDYSCVQHLA-L-KEPQTRFW   | 94 |
| O57 A                   |   | 59:GTFYVFSHLDFVPEDGDYSCVQHLA-L-TEPLTKLW    | 94 |
| D8.45 A1                |   | 59:GTMNVFSRLSFIPEEGDVYGCIVQHLA-L-QQPQTRTW  | 94 |
| D8.45 A2                |   | 59:RNFNVFSQLSFIPEEGDVYSCVQHLA-L-QQPQTRTW   | 94 |
| zebrafish DCA (13)      |   | 59:RNFNVFSQLSFIPEEGDVYSCVQHLA-L-QQPQTRTW   | 94 |
| D8.46 A                 |   | 59:GTMNVFSRLSFIPEEGDIYSCVQHLA-L-QQPQTRTW   | 94 |
| D18 A                   | X | 59:GTMNVFS*LSFIPEEGDIHSCVQHLA-L-QQPQTRTW   | 93 |
| salmon DDA              |   | 59:YTFYRFSTLTFEPQEGDIYTCIVDHTA-L-DEPLTRTW  | 94 |
| spotted gar 501 A2      |   | 59:ATFYQFSTLSFTPQLGDVYSCVQHLA-L-PEPKTRIW   | 94 |
| salmon DEA              |   | 60:FSFRIFSYLSITPQEGDIYSCVQHLA-L-QEPLTRIW   | 95 |
| seabream DEA (14)       |   | 60:FSFRLSSYLDFTPQQGDIYSCVQHLA-L-RAPLNRFW   | 95 |
| carp DEA (15)           |   | 33:FSLRLSYLNFRPERGDIYTCVQHLA-L-EQDITRFW    | 68 |
| loach DEA (16)          |   | 33:FSFRIFSYLDSPQEGDIYTCVQHLA-L-EQGITRFW    | 68 |
| spotted gar 501 A3      | X | 59:FSFKVFSFLPFTPRLGDVYSCVQHLA-L-PEPLARLW   | 94 |
| spotted gar 615 A       |   | 59:YSLRLSYLSFTPQAGDVYSCVQHLA-L-QEPLTRLW    | 94 |
| sturgeon (17)           |   | 59:FTLQMFYSYLSFTPELGDVYSCVQHLA-L-PETLTTFW  | 94 |
| spotted gar 501 A1      |   | 59:NKFAMFSYLSFTPQEGDIYTCVQHLA-L-SEPVSFVW   | 94 |
| little skate (18)       |   | 59:YTFQRFTYLNFIIPSPGDMYSCVQHLA-L-ERPTTVFW  | 94 |
| nurse shark (19)        |   | 59:FTYRRFSYLSIVPSPGDMYSCVQHLA-L-QDPVTVFW   | 94 |
| coelacanth (20)         |   | 59:YRFRKFSYLNFTPEVVDIYSCVQHLA-L-EEPINKFW   | 94 |
| Xenopus DAA (21)        |   | 59:YSFGRHLHYLAFNPNEHDIYTCVQHLA-L-DRPTRRVW  | 94 |
| chicken BLA (22)        |   | 59:LLFRKFSYLPFVQQRGDVYSCVQHLA-L-EGPVQRMW   | 94 |
| human DQA (23)          |   | 59:HSFFKISYLTFLPSADEIYDCVQHLA-L-DQPLLKHW   | 94 |
| human DRA (24)          |   | 59:HLFRKFHYLPFLPSTEDVYDCVQHLA-L-DEPLLKHW   | 94 |
| mouse DOA (25)          |   | 59:HRFRKFHYLTFLVPSAEDVYDCVQHLA-L-DTPLLQHW  | 94 |
| human DOA (26)          |   | 59:HLFRKFHYLPFVPSAEDVYDCVQHLA-L-DAPLLRHW   | 94 |
| Xenopus DMA (27)        |   | 59:IEYQTFSYLNITPTYTDSYTCNAQ-EG-S-T-TAVAYW  | 92 |
| anole lizard DMA (28)   |   | 60:WVFQAFSYLEITPQEGQVYSCVQHLA-L-PFSSVAFW   | 95 |
| chicken DMA (29)        |   | 59:LGFMRFSYLAVTPHSGDIYACIVTRER-D-NISVVAYW  | 94 |
| human DMA (30)          |   | 58:LSFQAFSYLNFTPEPSDIFSCIVTHEI-D-RYTAIAYW  | 93 |

**Text S4D: Beta 2 domain sequence alignment**

| Sequence             | Position | Sequence                                                         | Position |
|----------------------|----------|------------------------------------------------------------------|----------|
| salmon DAB (31)      | high     | 1:VEPHVRLSSVAPPSGRHPAMLMCSAYDFYPKPIRVTWLRDGREVK-SDVTS-TEELANGD   | 58       |
| trout DAB (32)       |          | 1:VEPHVRLSSVTPPSGRHPAMLMCSAYDFYPKPIRVTWLRDGREVK-SDVTS-TEELANGD   | 58       |
| Arctic char (33)     |          | 1:VEPHVRLSSVTPPSGRHPAMLMCSAYDFYPKPIRVTWLRDGHVVK-SDVTS-TEELANGD   | 58       |
| D8.35 B1             | X        | 1:-----MCSAYDFYPPHINVFWRNGEVMT-SEVTS-TMEMADGD                    | 37       |
| D8.35 B2             |          | 1:VKPKVKLSSVTRAGGRQSTVLMCSAYDFYPPHINVFWRNGEVMT-SEVTS-TMEMADGD    | 58       |
| D8.35 B3             | high     | 1:VKPKVKLSSVTRAGGRHPAVLMCSAYDFYPPHIKISWLRDQGVV-SDVTS-TEEMADGD    | 58       |
| D8.37 B1             |          | 1:VKPKVKLTLVKPAGGRHPAVLMCSAYEFYPPHIRVYWLRNGEVIT-SDVTS-TMEMADGD   | 58       |
| D8.37 B2             | X        | 1:-KPTVVLSSVTQANGRHPAMLI CSAYEFYPRHIKVSWLKGGKSVT-SEVTS-TMEMADGD  | 39       |
| D8.37 B3             | high     | 1:VLPEVTIKSVRQAEGRHPAVLLCSAYEFYPKIKMSWLRDQKEVT-SDVTS-TMEMADGD    | 58       |
| D4 B                 |          | 1:VMPKVNLSLVQKGDGRHPYLLRCSAYDFYPPQIKMSWLRDGRVV--SDVTS-SEQMPNGD   | 57       |
| zebrafish DAB1 (34)  |          | 1:VKPKVTIQSVMQAEKGHPAMLLCDAYEFYPKIKMSWLRDDKVVT-SDVTS-TIEMANGN    | 58       |
| zebrafish DAB2 (35)  |          | 1:VKPKVTMKSVMQAEGRHPAMLLCSAYEFYPKIKMYWLRDQSKVIT-SDVTS-TMEMANGN   | 58       |
| zebrafish DAB3 (36)  |          | 1:VLPEVTIKSVRQAEKGHPAVLLCSAYEFYPKIKMSWLRDQKEVT-SDVTS-TMEMADGD    | 58       |
| zebrafish DAB4 (37)  |          | 1:VLPEVTIKSVRQAEGRHPAVLLCSAYEFYPKIKMSWLRDQKEVT-SDVTS-TMEMADGD    | 58       |
| zebrafish DDB (38)   |          | 1:-KPTVVLSSVTQANGRHPAMLI CSAYEFYPRHIKVSWLKGGKAVT-SEVTS-TMEMADGD  | 57       |
| zebrafish DEB (39)   |          | 1:VKPQVKLNSVKQAGGRQPAVLVCSAYDFYPKRIKVTWLRNGKPV-SDVTS-TEELADGD    | 58       |
| carp DAB (41)        |          | 1:VQPKITLRSARQAGGRPAVLVCSAYEFYPKIKVSWLRDQKEMT-SDVTS-TMEMANGN     | 58       |
| G129 B               | X        | 1:-EYVRLHSETPPGGGPLSMLVCSVYDFYPKKIIVRWTRDGRPET-TGVTS-TDELADGD    | 56       |
| G131 B1              |          | 1:AEPYVRLHSETPPGGGPLSMLVCSVYDFYPKKIIVRWTRDGRPET-TGVTS-TDELADGD   | 58       |
| G131 B2              | X        | 1:AEPYVRLHSETPPGGGPLSMLVCSVYDFYPKKIIVRWTRDGRPET-TGVTS-TDELADGD   | 58       |
| G131 B3              |          | 1:AEPYVRLHSETPPGGGPLSMLVCSVYDFYPKKIIVRWTRDGRPET-TGVTS-TDELADGD   | 58       |
| GIII B               |          | 1:AEPYVRLHSETPPGGGPLSMLVCSVYDFYPKKIIVRWTRDGRPET-TGVTS-TDELADGD   | 58       |
| GVII B               |          | 1:AQPYVRLHSETPLGGRTSSMLVCSVYDFYPPQNIIVRWTRDGRPEA-TGVSS-TDELADGD  | 58       |
| stickleback DAB (42) |          | 1:AEPYVRLHSETPPGGGPLSMLVCSVYDFYPKKIIVRWTRDGRPET-TGVTS-TDELADGD   | 58       |
| stickleback DBB (43) |          | 1:AEPYVRLHSETPPGGGPLSMLVCSVYDFYPKKIIVRWTRDGRPET-TGVTS-TDELADGD   | 58       |
| M3 B                 |          | 1:VQPRVRVQSLEPSGGNHAPAMLI CSVYDFYPKIKVSWLQDQEEVS-SDVTS-TAEMEDGD  | 58       |
| M615 B               |          | 1:VKPSVMIESVTSGGHHPAMLVCSVYDFYPKYIKVSWLRDQEEVS-SDVTS-TTELEDGD    | 58       |
| M873 B               | high     | 1:VQPRVRVQSLAPSGGHHAPAMLVCSVYDFYPKTIRVSWLRGKKEEVS-SDVTS-TAEMEDGD | 58       |
| medaka DAB (44)      |          | 1:VQPRVRVQSLAPSGGHHAPAMLVCSVYDFYPKTIRVSWLRGKKEEVS-SDVTS-TAEMEDGD | 58       |
| medaka DBB (45)      |          | 1:-QPSVMIESVTPSGGHHAPAMLVCSVYDFYPKTIRVSWLRGKKEEVS-SDVTS-TAEMEDGD | 57       |
| medaka DCB (46)      |          | 1:-QPRVRVHSLPSSGNHPAMLI CSVYDFYPKIKVSWLQDQEEVS-SDVTS-TA-----     | 51       |
| F7533 B              |          | 1:VEPTVRVHVVPPAGGHPAMLVCSVYDFYPRYIKVSWQRDQEEVS-QDVT-TDELADGD     | 58       |
| F8524 B              | X        | 1:VEPTVRVHVVPPAGGHPAMLVCSVYDFYPRYIKVSWQRDQEEVS-QDVT-TDELADGD     | 58       |
| T19 B                |          | 1:VLKDFVYVSVAPPAGGHPAMLVCSVYDFYPKIKVSWRRDQEEVS-HDVT-TDELADGD     | 58       |
| T48 B                | X        | 1:-LKDVLVYVSVAPPAGGHAAMLVCSVYDFYPKIKVSGRRDQEEVS-HDVT-TDELADGD    | 57       |
| T61 B                | X        | 1:-LREVVLVSVAPPAGGHA-----S-HDVT-TDELADGD                         | 14       |
| T70 B                | X        | 1:IAPTVRVHLVAPPAGGHAAMLVCSVYDFYPKIKVSWRRDQEEVS-HDVT-TDELADGD     | 58       |
| O1 B1                |          | 1:VQPSVRIKSMTPPSGQHPAMLVCSVYDFFPKIKVSWLRDQQAVS-SDITS-TEEMPNGD    | 58       |
| O18 B1               |          | 1:AKPYVKLHSTMPSSHHAPAMLVCSVYDFFPSEIKVSWQRDQEEVT-SDVTS-TEEMADGD   | 58       |
| O18 B2               |          | 1:AKPYVKLHSTMPASSHHAPAMLVCSVYDFFPKIKVSWLRDQEEVS-SDVTS-TEEMADGD   | 58       |
| O18 B3               | X        | 1:-----EEADGD                                                    | 7        |
| O22 B1               |          | 1:VKPSVRLHSIPPVY-LNPAILVCSVYNFYPKIKVSWLRNGQQVS-PDITS-TVEFANAD    | 57       |
| O31 B1               |          | 1:VQPRVRIKSKTPLSGQHPAMLVCSVYDFFPKIKVSWLRDQEEVY-SDVTS-TEVMPNGD    | 58       |
| O31 B2               |          | 1:VRPRVRIKSKTPLSGQHPAMLVCSVYDFFPNKIKVRWLRDQEEVT-SDVTS-TEVMPNGD   | 58       |
| O31 B3               |          | 1:VRPSVRIKSKTPLSGQHPAMLVCSVYNFFPKIKVSWLRDQQKVT-SDVTS-TQEMPNGD    | 58       |
| O49 B                | X        | 1:-KPYVRLHSTTPAYSQHPAMLVCSVYDFFPKIKVSWLRDQEEVT-SDVTS-TEEMADGD    | 39       |
| O50 B                | X        | 1:-----YQNIPSKIKVSWHRDQEEVT-SDVTS-TEEMEDGD                       | 36       |
| O77 B                | X        | 1:----VKLHSTTPLSSHHPAMLVCSVDFFPKIKVSWHRDQEEVT-SDVTS-TEEMEDGD     | 54       |
| O79 B1               | X        | 1:STPSVRLHSTMAPGCHHPAMLVCSVYDFYPKLIKVSWLRNGQEIT-SDITS-TEEFANGD   | 58       |
| O79 B2               |          | 1:VTPSVRLHSTMAPGCHHPAMLVCSVYDFYPKLIKVSWLRNGQEIT-SDITS-TEEFANGD   | 58       |
| O80 B                |          | 1:AQPTVKLHSTTPLSSHHPAMLVCSVYDFFPKIKVSWHRDQEEVT-SDVTS-TEEMEDGD    | 58       |
| O745 B               |          | 1:AKPYVKLHSTTPDYSHHPAMLVCSVYDFFPKIKVSWLRDQEEVT-SDVTS-TEEMADGD    | 58       |
| O779 B               | X        | 1:-----YDFYPSKIKVSWHTDQEEVT-SDITS-TEEMTDGD                       | 33       |
| O845 B               |          | 1:VKPSVRLHSIPPVY-LNPAILVCSVYNFYPKIKVSWLRNGQQVS-PDITS-TVEFANAD    | 57       |
| OA78 B               | X        | 1:VKPFVRLHWTKPPVDHHPAILACS IYDFYPKYIKVTWLRNGQRVT-SNTTT-TEELPAD   | 58       |
| salmon DBB           |          | 1:VEPNVTLRLEGPSS---DSSLVCSVHFFYPKHIRVTWLRNGEEVT-SDVTS-TDVLANGL   | 55       |
| GXVII B              |          | 1:AAPSURLAEA--SGSGHNTTLVCSAYDFYPRRIRLAWLRDQEEVT-SGATF-SEVTNGN    | 56       |
| M5 B1                |          | 1:VEPNVSLQTV-----DNDSTLECSALDFYPKHIRLTFWSNGQEV-EGVTF-SDVLPNGD    | 54       |
| M5 B2                |          | 1:VEPNVSLQTV-----DNDSTLECSALDFYPKHIRLTFWSNGQEV-EGVTF-SDVLPNGD    | 54       |
| O97 B1               | X        | 1:-APSMTLQEGD-HTSTHDTILVCSVYDFYPKHILVTWYLNQEV-----               | 42       |

|                         |      |                                                                  |    |
|-------------------------|------|------------------------------------------------------------------|----|
| O97 B2                  | X    | 1:AAPSMTLQEGD-HTSSHDTILVCSVYDFYPKHILVTWYLNQEQEVT-E-----          | 45 |
| salmon DCB              |      | 1:VEPYISLRSVEPFSTRHPAMLVCSAYDFYKPIRVMWLKNGQEVTS-SNVTS-TEELVNGD   | 58 |
| M16 B                   |      | 1:VEPSVRVTPVVRQGSSEQAMLACSAYNFYKQIRLTWLRNGEKVI-NYVTS-TEELPDGN    | 58 |
| GXX B                   |      | 1:-EPSVRLRSVHAADSRHPRMLLCTGYGFYKQIRVMWLRNGNNVT-SDVTS-TEELSNGN    | 57 |
| O29 B1                  |      | 1:VKPSVRLRLVESADSKHPGLFMCAYNFYKQIKLTWLRDQKEAT-SNVTS-TDEL PNGN    | 58 |
| swordtail DXB (47)      |      | 1:VEPYVQLRLEKAEYSQHQQMLICSAYDFYKQIKVTWLRDQKEVTS-SDVTS-TDEL PNGN  | 58 |
| O9 B                    |      | 1:VPPVSRLLKSVTSNSSEDSDEVLVCSAYNFYKQIRLSWLRDGVVIP-DPPGMMITEMPGGE  | 59 |
| O33 B1                  | X    | 1:-----STLVCSAYNFYKQIRMMWNRNGQEVTS-TDVSYS-SDVMPDGD               | 40 |
| O33 B2                  | X    | 1:-----D                                                         | 1  |
| O57 B                   |      | 1:DIPTIRVKSVKQHSGGHPAMLVCSAFNFYKQIRMIWLRNQEVT-TGVSY-SEVMPDGD     | 58 |
| D18 B                   |      | 1:VKPEVFRSLREASGKRPALLSCSAYNFYKPHIKLTWMRDDKVVTS-ADVMS-TKVMADGD   | 58 |
| zebrafish DBB (48)      |      | 1:VKPEVFRSLREASGKRPALLSCSAYNFYKPHIKLTWMRDDKVVTS-ADVMS-TKVMADGD   | 58 |
| D8.45 B1                |      | 1:VKPEVIIRSVTAEKGNRKAVLVCSAYDFYKQIKLTWMRDDKVVTS-AELTS-SEVMADGH   | 58 |
| D8.45 B2                |      | 1:VKPEVIIRSVTAEKGNQKAVLVCSAYDFYKQIKLTWMRDDKVVTS-ADVMS-IEEMADGD   | 58 |
| zebrafish DCB (49)      |      | 1:VKPEVIIRSVTAEKGNQKAVLVCSAYDFYKQIKLTWMRDDKVVTS-ADVMS-IEEMADGD   | 58 |
| spotted gar 501 B2      | X    | 1:-EPDVRLSSTKPSQKHPAMLVCSALGFYKQIKVSWLRDQGTVT-SDVTS-TEELADGD     | 57 |
| salmon DEB              |      | 1:VPPIVKVRLLTKPSRYGELSMLECSVLGFYKQEVRSWLRDQRETT-TAVTS-TDTLANGD   | 58 |
| fathead minnow DEB (50) |      | 1:VPPAVTIRPTKKAHYGQLSTLVCHAYNFYKQAINITWLLDQSEVT-GDVTS-TEFMDNGD   | 58 |
| spotted gar 501 B1      |      | 1:IKPEVKIYPAKTASQGHHTMLVCHAHGFYKQIAVSWLRNGQPVSS-SDLTS-MSFASDGD   | 58 |
| spotted gar 615 B       |      | 1:VPPSVKVSATKLLSSKHPTMLVCHVTGFYKQIRITVTVWLRDGLEIK-TDVTS-TDLLANGD | 58 |
| paddlefish DAB01 (51)   |      | 1:IPPSVRVRSMKPFSQHQTMVLCNAFGFYKPREIQMTWLRNGVKT-ADVSS-SELLSDGD    | 58 |
| paddlefish DAB02 (52)   |      | 1:IPPSVRVRSMKPFSQHQTMVLCNVFGFYKPREIQMTWLRNGVKT-ADVSS-SELLSDGD    | 58 |
| paddlefish DAB03 (53)   |      | 1:IPPSVRVRSMKPFSQHQTMVLCNAFGFYKPREIQMTWLRNGVKT-ADVSS-SELLSDGD    | 58 |
| ray (54)                |      | 1:VEPETVVRPKVSSHSGPSALLTCHVTGFYKPEIEVKWLNKGAPEV-TGAIN-TVLLSDGD   | 58 |
| nurse shark (55)        |      | 1:VEPKVTVIRTKESTYVGPSSAILICYAVGFYKPAKISVTWLNKQKVS-DADVT-VELLNGD  | 58 |
| coelacanth (56)         |      | 1:ISPAAVITPTKGMSSSHPNMLVCYVTGFFPSKITVTVWFRNGKEVD-SHVTS-SELLQNGD  | 58 |
| Xenopus DAB (57)        |      | 1:SQPNVKIVNTKTLDEHENLITCFVGGFFPLIKVTWLNKNGIEEG-EQVTS-SELLQNGD    | 58 |
| chicken BLB (58)        |      | 1:VEPKVRVSAALQSGSLPETDRLACYVTGFYKPEIEVKWFLNGREET-ERVVS-TDVMQNGD  | 58 |
| human DQB (59)          |      | 1:VEPTVITISPSRTEALNHHNLLICSVTDFYKQIKVRFWRNDQEE-AGVVS-TPLIRNGD    | 58 |
| human DRB (60)          |      | 1:VEPKVTVYPSKQPLQHNNLLVCSVSGFYKPGSEIEVRFWRNDQEE-AGVVS-TGLIRNGD   | 58 |
| mouse DOB (61)          |      | 1:VPPVTVYPERTPLLQHNNLLICSVTGFYKPGDISVKWFRNGQEE-AGVVS-TGLVNRNGD   | 58 |
| human DOB (62)          |      | 1:VQPEVTVYPERTPLLQHNNLLICSVTGFYKPGDIKIKWFLNGQEE-AGVVS-TGPIRNGD   | 58 |
| Xenopus DMB (63)        |      | 1:VQPSMKVFLPDIHVEGSIHPLVCHVWGFYKPADIVVLWLLNDTILV-KNYTN---AVPVGD  | 56 |
| anole lizard DMB (64)   |      | 1:APPQVLIHVPTRQGPSSARVLSVAVWGFYKPEVDIAWFWNGAPVE-AQQGP-LSLRSNGD   | 58 |
| chicken DMB (65)        |      | 1:TPPQVRIVPIPIISNDPDTVHLLICVWGFYKPAVTIQWLHNLV---ASGD-TKLLPNGD    | 56 |
| human DMB (66)          |      | 1:RPPSVQVAKTTPFNTREPVMVLCYVWGFYKPAEVTITWRKNGKLVMPHSSAH-KTAQPNGD  | 59 |
| E162▼                   |      |                                                                  |    |
| salmon DAB (31)         | high | 59:WYYQIHSHLEYTPRSGE-KISCMVEHISLTEPMVYHW                         | 94 |
| trout DAB (32)          |      | 59:WYYQIHSHLEYTPKSGE-KISCMVEHISLTEPMYHW                          | 94 |
| Arctic char (33)        |      | 59:WYYQIHSHLEYTPKSGE-KISCMVEHNSLTEPMVYHW                         | 94 |
| D8.35 B1                | X    | 38:WYYQIHSSELEYSPKSGE-RISCVIEHASSNKPMIYDW                        | 73 |
| D8.35 B2                |      | 59:WYYQIHSSELEYSPKSGE-RISCVIEHASSNKPMIYDW                        | 94 |
| D8.35 B3                | high | 59:WYYQIHSSELEYSPKSGE-KISCAVEHASSTKPIIYDW                        | 94 |
| D8.37 B1                |      | 59:WYYQIHSSELEYSPKSGE-RISCVIEHASSNKPIITEW                        | 94 |
| D8.37 B2                | X    | 40:WYYQIHSSELEYTPGSGE-KISCLVEHASSSEPMIYDW                        | 75 |
| D8.37 B3                | high | 59:WYYQIHSHLEYTPKSGE-KIQCLVEHASLTQPLTKDW                         | 94 |
| D4 B                    |      | 58:WYYQHSSELVFSPKSGE-TISCMVEHSSLTGPPVIDW                         | 93 |
| zebrafish DAB1 (34)     |      | 59:WYYQIHSHLEYTPKSGE-KIQCVVEHASSTQPIKTEW                         | 94 |
| zebrafish DAB2 (35)     |      | 59:WYYQIHSHLEYTPKNGE-KIQCVVEHASSTQPIKTEW                         | 94 |
| zebrafish DAB3 (36)     |      | 59:WYYQIHSHLEYTPKSGE-KIQCLVEHASLTQPLTKDW                         | 94 |
| zebrafish DAB4 (37)     |      | 59:WYYQIHSHLEYTPKSGE-KIQCLVEHASLTQPLTKDW                         | 94 |
| zebrafish DDB (38)      |      | 58:WYYQIHSSELEYTPRSGE-KISCMVEHASSSEPMIYDW                        | 93 |
| zebrafish DEB (39)      |      | 59:WYYQIHSHLEYTPKSGE-KISCMVDHASSTEPPIIADW                        | 94 |
| carp DAB (41)           |      | 59:WFYQIHSSELEYTPKSGE-KISCMVEHASSFSKPMITDW                       | 94 |
| G129 B                  | X    | 57:-----RSGE-KMSCVVEHISLSKPLVTDW                                 | 79 |
| G131 B1                 |      | 59:WYYQTHSHLEYTPRSGE-KISCVVEHISLSKPLVTDW                         | 94 |
| G131 B2                 | X    | 59:WYYQTHSHLEYTPRSGE-KISCVVEHISLSKPLVTDW                         | 94 |
| G131 B3                 |      | 59:WYYQTHSHLEYTPRSGE-KISCVVEHISLSKPLVTDW                         | 94 |
| GIII B                  |      | 59:WYYQTHSHLEYTPRSGE-KISCVVEHISLSKPLVTDW                         | 94 |
| GVII B                  |      | 59:WYYQTHSYLEYTPRSGE-KIACVVEHISLSKPLVTDW                         | 94 |
| stickleback DAB (42)    |      | 59:WYYQTHSHLEYTPRSGE-KISCVVEHISLSKPLVTDW                         | 94 |
| stickleback DBB (43)    |      | 59:WYYQTHSHLEYTPRSGE-KISCVVEHISLSKPLVTDW                         | 94 |

|                         |                                           |    |
|-------------------------|-------------------------------------------|----|
| M3 B                    | 59:WFYQIHSYLEYTPRSGG-KISCRVEHISLKDPLITDW  | 94 |
| M615 B                  | 59:WYYQIHSHLEYTPRSGE-KISCRVEHASLKDPLITDW  | 94 |
| M873 B high             | 59:WYYQIHSHLEYTPRSGE-KISCKVEHASLKDPLVTEW  | 94 |
| medaka DAB (44)         | 59:WYYQIHSHLEYTPRSGE-KISCKVEHASLKDPLVTDW  | 94 |
| medaka DBB (45)         | 58:WYYQIHSHLEYTPRSGE-KISCKVEHASLKDPLVTEW  | 93 |
| medaka DCB (46)         | 51:-----                                  | 51 |
| F7533 B                 | 59:WFYQLHSHLEYTPRSGE-KISCVVEHASLKTPLVKDW  | 94 |
| F8524 B X               | 59:WFYQLHSHLEYLP-----                     | 71 |
| T19 B                   | 59:WFYQLHSHLEYTPRSGE-KISCVVEHASLKTPLVKDW  | 94 |
| T48 B X                 | 58:WFYQLHSHLEYTPRSGE-KISCVVEHASLKTPLVRDW  | 93 |
| T61 B X                 | 15:WFYQLHSHLEYTPRSGE-KISCVVEHASLKTPLVKDW  | 50 |
| T70 B X                 | 59:WFYQLHSHLEYTPRSGE-KISCVVEHASLKTPLVKDW  | 94 |
| O1 B1                   | 59:WYYQTHSQLEYTPRSGE-KISCVVEHASLKEPLITDW  | 94 |
| O18 B1                  | 59:WYYQTHSHLEYTPRSGE-KISCVVEHASLKEPLITDW  | 94 |
| O18 B2                  | 59:WYYQTHSHLEYTPRSGE-KISCKVEHASLKEPLITDW  | 94 |
| O18 B3 X                | 8:WYYQIHSHLEYTPRSGE-KISCKVEHASLKEPLITDW   | 43 |
| O22 B1                  | 58:WLYQTHSYMEYTPRSGE-KISCMVEHASLKEPLVTDW  | 93 |
| O31 B1                  | 59:WYYQTHSHLEYKPRSGE-KISCVVEHVSLSLEPLITDW | 94 |
| O31 B2                  | 59:WYYQTHSYLEYTPRSGE-KISCVVEHVSLSLEPLITDW | 94 |
| O31 B3                  | 59:WYYQTHSHLEYTPRSGE-NISCVVEHASLKEPLITDW  | 94 |
| O49 B X                 | 40:WYYQTHSHLEHTPRSGE-KISCKVEHASLKEPLITDW  | 75 |
| O50 B X                 | 37:WYYQTHCYLEYTPRSGE-KISCVVEHASLKEPLITNW  | 72 |
| O77 B X                 | 55:WYYQTHCYLEYTPR-----                    | 68 |
| O79 B1 X                | 59:WLYQVHSHLEY-----                       | 69 |
| O79 B2                  | 59:WLYQVHSHLEYMPRSGE-KISCVVEHASLKEPLIINW  | 94 |
| O80 B                   | 59:WYYQTHCYLEYTPRSGE-KISCVVEHASLKEPLITNW  | 94 |
| O745 B                  | 59:WYYQTHSHLEYTPRSGE-KISCKVEHASLKEPLITDW  | 94 |
| O779 B X                | 34:*YYQIHSHLEYTPRSGE-NISCVVEHASLKEPLITDW  | 68 |
| O845 B                  | 58:WLYQTHSYMEYTPRSGE-KISCMVEHASLKEPLVTDW  | 93 |
| OA78 B X                | 59:WFYQTHSYLEYTP-----                     | 71 |
| salmon DBB              | 56:WSYQIQSYLKYTPPTGE-RITCMVEHISQTEPKLYYW  | 91 |
| GXVII B                 | 57:WTYAVHSSLSFTPGGRD-RVSCKVEHAGLQEPALRTW  | 92 |
| M5 B1                   | 55:WTYQAHTYLTLPKQD-HISCMVQHTSLKEPKIYNW    | 90 |
| M5 B2                   | 55:WTYQAHTYLTLPKQD-HISCMVQHTSLKEPKIYNW    | 90 |
| O97 B1 X                | 42:-----                                  | 42 |
| O97 B2 X                | 46:-----RVTCTVEHVSLEPKSSYW                | 68 |
| salmon DCB              | 59:WTYQIHSHLEYTPTPGE-RIPCMVEHFSLTEPKLYDW  | 94 |
| GXX B                   | 58:WLYQIHSYLEFTPRSGG-EISCVVEHASLTQPKVYDW  | 92 |
| M16 B                   | 59:WLYQIHSYLEYTPSPRE-EITCMVEHASPKPKLYNW   | 94 |
| O29 B1                  | 59:WLYQIHSYIEISSKPEGE-KISCVVEHASLTEPKVIDW | 94 |
| swordtail DXB (47)      | 59:WLYQIHTYLEFTPKPGE-KITCMVEHASLKEPSLYDW  | 94 |
| O9 B                    | 60:WRYQIHSYLQHKLNSGQ-NITCMIHRGLQEPQLLKL   | 95 |
| O33 B1 X                | 41:WYYQTHSYLEYIPTSAGE-KIACMVEHLGLSEPMFVWV | 76 |
| O33 B2 X                | 2:WYYQTHSYLEYIPTSAGE-KIACMVEHLGLSEPMFVWV  | 37 |
| O57 B                   | 59:WYYQIHSYLEYTPTHGE-KITCVVEHLSVSEPIIAIW  | 94 |
| D18 B                   | 59:WYYQIHSHLEYFPQPGE-KISCVVEHASSHKPMIYYW  | 94 |
| zebrafish DBB (48)      | 59:WYYQIHSHLEYFPQPGE-KISCVVEHASSHKPMIYYW  | 94 |
| D8.45B1                 | 59:WHYQIHSYLEYFPQTGE-KISCVVDHASSLKPMIYYW  | 94 |
| D8.45B2                 | 59:WYYQIHSHLEYFPQPGE-KISCVVDHASFHKPMIYYW  | 94 |
| zebrafish DCB (49)      | 59:WYYQIHSHLEYFPQPGE-KISCVVDHASFHKPMIYYW  | 94 |
| spotted gar 501 B2 X    | 58:WYYQIHSHLEYTPRAGE-SIVCRVEHSSFATPKELTW  | 93 |
| salmon DEB              | 59:WSYQLHSYLEFRPQRGE-SVSCMVEHPSLDEPLEVWV  | 94 |
| fathead minnow DEB (50) | 59:WRYQMHSHLDLVLRGV-SVSCRVEHSGLEKPLVVQW   | 94 |
| spotted gar 501 B1      | 59:WTYQTLLYLEFTPQGGG-TFECVDHVALDGTCLKLRW  | 94 |
| spotted gar 615 B       | 59:WTYQVHSHLELTPRAGE-TVACRVEHSSLERPLEVTW  | 94 |
| paddlefish DAB01 (51)   | 59:WTYQIHSYLELTPQSGD-SYSCRVEHSSLAEAIEVKW  | 94 |
| paddlefish DAB02 (52)   | 59:WTYQIHSYLELTPQSGD-SYSCRVEHSSLAEAIEVKW  | 94 |
| paddlefish DAB03 (53)   | 59:WTYQIHSYLELTPQSGD-SYSCRVEHSSLAEAIEVKW  | 94 |
| ray (54)                | 59:WTYQVEELLQYHPVSGD-VYTCHVEHVSLETPMTVDW  | 94 |
| nurse shark (55)        | 59:WTYQVRQYLQYEPVYGD-KYTCHVEHSSLTSPMSVDW  | 94 |
| coelacanth (56)         | 59:WTYQIHVFMETPKSGD-VYTCRVEHSSLEDPMELTW   | 94 |
| Xenopus DAB (57)        | 59:WTFEIHVMLETTIKHGD-TFTCRVEHSSLQQPVYLNW  | 94 |
| chicken BLB (58)        | 59:WTYQVLVVLETVPRRGD-SYVCRVEHASLRQPISQAW  | 94 |

|                       |                                                                                                |    |
|-----------------------|------------------------------------------------------------------------------------------------|----|
| human DQB (59)        | 59:WTFQILVMLEMT <b>P</b> QRGD-VYTC <b>H</b> VEHPSLQSPITVEW                                     | 94 |
| human DRB (60)        | 59:WTFQTLVMLE <b>T</b> VPRSGE-VYTC <b>V</b> EHPSVTSPLTVEW                                      | 94 |
| mouse DOB (61)        | 59:WTFQTTVMLE <b>M</b> IP <b>E</b> LGD-IYSCLVEHPGLLRPVSAW                                      | 94 |
| human DOB (62)        | 59:WTFQTVVMLE <b>M</b> T <b>P</b> ELGH-VYTC <b>L</b> V <b>D</b> HSSLLSPISVEW                   | 94 |
| Xenopus DMB (63)      | 57:WTYQI <b>V</b> ALLDMRGSL <b>P</b> ENKYTCVVQHSSLQD <b>P</b> MTEDW                            | 93 |
| anole lizard DMB (64) | 59:WTFQ <b>A</b> ERSLALEPR <b>P</b> RG-IYSCRVNHPSLQ <b>E</b> PIVVEW                            | 94 |
| chicken DMB (65)      | 57:WTYRTQ <b>V</b> ALRA <b>S</b> T <b>A</b> AGS-TYTCS <b>V</b> WHSSLE <b>Q</b> PL <b>Q</b> EDW | 92 |
| human DMB (66)        | 60:WTYQ <b>T</b> LSHLAL <b>T</b> PS <b>Y</b> GD-TYTC <b>V</b> VEHIG <b>A</b> PE <b>P</b> ILRDW | 95 |



## Text S4E: Transmembrane and cytoplasmic domains alignment

### (a) MHC class II $\alpha$ transmembrane/cytoplasmic domains

|       |                     |                                                 |
|-------|---------------------|-------------------------------------------------|
| DA    | salmon DAA (1)      | VFCGVGLTLGLLGVAAGTFFFLIKGNQCN                   |
|       | stickleback DAA (1) | VGPAVFCGVGLTVGLLGVAAGTFFFLIKGNECS               |
|       | zebrafish (4)       | VGPAVFCGVGLVVLGLLGVAAGTFFFLIKGNNCN              |
| DB    | salmon DBA          | PAVFCGVGLTLGLLGVAAGTFFFLIKGNQCN                 |
|       | salmon DCA          | AGPAVFCGVGLTLGLLGVAAGTFFFLIKGNQCN               |
|       | zebrafish D8.46 A   | VFCGVGLALGLLGVAAGTFFFLIKGNQCN                   |
| DE    | salmon DEA          | TAVCVGGVTLGVVGVATGVVFIKAKRSGWALRT               |
|       | loach DEA (16)      | AVLVVGIIVGFIGLVAGIMVIVMSKLELPAV                 |
|       | spotted gar 615 A*  | AVCGVGLTLGLLGVAAGTFFFLIKGNKCN                   |
| cart. | nurse shark (19)    | IICALGLTLGIISAVVGIIILLIKERQRLQAQQHGI            |
| t.cl. | Xenopus DAA (21)    | VICALGLAVGIIGIAGVMLIIGMKQSAAQGRSQR              |
|       | chicken BLA (22)    | ATLWCAVGLAVGIAGIAAGTALILRAVRRNAANRQPG           |
|       | human DQA (23)      | VVCAVGLSVGLMGIVVGVVFIQGLRSV GASRHQGPL           |
| DO    | mouse DOA (25)      | LICGLGLVLGLMGCLLGTVLMITGTRRPSIRR                |
|       | human DOA (26)      | LVCALGLAIGLVGFLVGTVLIIMGTIVSSVPR                |
| DM    | Xenopus DMA (27)    | VLCYLAIAIGIVFLFLGLLFLFLTWKQHRND                 |
|       | chicken DMA (29)    | VLATAVCGAVTALGILLALLGLGLLLSARRRSMWGWQRQQGHPPRTH |
|       | human DMA (30)      | VLCGVAFGLGVLGIIVGIVLIIYFRKPCSGD                 |

### (b) MHC class II $\beta$ transmembrane/cytoplasmic domains

|       |                         |                                                      |
|-------|-------------------------|------------------------------------------------------|
| DA    | salmon DAB (31)         | IAIGASGLVLCAILALAGLI--YKPKSS--GVL                    |
|       | stickleback DAB (42)    | VAIGASGLLILGLTSLAGFI--YKPKAR--GRVLPESH               |
|       | zebrafish DAB (34)      | FAIGASGLVLCIILAIAGLI--YKPKST--GRVLPEN                |
| DB    | salmon DBB              | IVIGVCGLLLVVVFVAGLI--YKPKST--GRVLPESH                |
|       | stickleback GXVII B     | TGFLVGGVCAALLGAACLSGLI--VHRRKYSNLS                   |
|       | salmon DCB              | MVIGACGLLLGVVFIAAGLI--YKPKSTE--GRVLEPTMALPESYGTI     |
|       | swordtail DXB (47)      | IVVGPAGLLLVLFVSIAGFI--YKPKTSN--GQVVVPTTEDVCPPEETL    |
|       | zebrafish D8.45 B1      | IILGAVGLLMGIFTAAAGVI--YKPKQT--GFYRLPVC               |
| DE    | salmon DEB              | MAIGVCSLFIGVAMAIGGVYVWKN----RSGFRRVNR                |
|       | fathead minnow DEB (50) | LAVGCFSELLGLIVAFSA--YIYKRRHR--GFSSLEL                |
|       | spotted gar 615B*       | IVIGVSGLLILGLIITAAGVI--YKPKSS--GRVLPESH              |
|       | paddlefish DAB01 (51)   | IIIGTSGIVLGLVILAAGLI--YKPKAK--GRVLPESH               |
| cart. | ray (54)                | IIVGALGFVFGLLILLAGV---IMRLKNA--KALPDSASHGPRLMGPAIS   |
|       | nurse shark (55)        | IIVGVLGFGFLIILLAGV---IMRLKNA--KALPDS-NHGPRLMGPAVS    |
| t.cl. | Xenopus DAB (57)        | MLTGIIIGFVLGSIFIIIVGLV-VYLRSKK---TMAHFSSVQENLM       |
|       | chicken BLB (58)        | LLTGVGGFVLGLVFLALGLF-VFLRGQK---GRPVAAPGMLN           |
|       | human DQB (59)          | MLSGVGGFVLGLIFLGLGL---IIRQRSRK-G-ESH                 |
| DO    | mouse DOB (61)          | IILSAAAFLGLIVFLVGVV-IHLKAQK---ASVETQ-PGNLASRE-ESHQSP |
|       | human DOB (62)          | MLSGIAAFLGLIFLLVGVV-IQLRAQK---GYVRTQMSGNVSRAVLHPQSC  |
| DM    | Xenopus DMB (63)        | ISIAATVVVFLGLVTLIAGFV--LWRNAKKS-GYIPIPG--YNEGN       |
|       | chicken BMB (65)        | VAVATVVMVLGLSLLFIQVY--CWRAQPPAPGYAPIPGHNYPSGSI       |
|       | human DMB (66)          | VSVSAVTLGLGLIIFSLGVI--SWRRAGHS-SYTPIPGSNYSEGWHIS     |
